# Supplementary material for: Sex-specific attenuation of photoreceptor degeneration by reserpine in a rhodopsin P23H rat model of autosomal dominant retinitis pigmentosa
Source: eLife. 2025 Apr 15;14:RP103888. doi: 10.7554/eLife.103888 (PMC11999695; doi:10.7554/eLife.103888)
Supplement: Figure 5—source data 1. — Comparisons of WT and P23H retinas from female samples only, male samples only, and with both sexes combined. [file elife-103888-fig5-data1.xlsx]

## Sheet: Description
Figure 5–Source Data 1. Differential gene expression between WT and P23H retinas
Worksheets	Description
combined	Output of limma topTable comparisons of WT and P23H retinas with both sexes combined
female only	Output of limma topTable comparisons of WT and P23H retinas from female samples only
male only	Output of limma topTable comparisons of WT and P23H retinas from male samples only

## Sheet: combined
logFC	AveExpr	t	P.Value	adj.P.Val	B	ENSEMBL	name	description
-2.14655	5.18584	-32.8362	5.22234e-16	5.60148e-12	26.4268	ENSRNOG00000017260	Cdr2	cerebellar degeneration-related protein 2 [Source:RGD Symbol;Acc:1310578]
-1.32855	7.73771	-31.0736	1.23692e-15	6.6336e-12	25.9776	ENSRNOG00000055779	Tdrd7	tudor domain containing 7 [Source:RGD Symbol;Acc:619724]
-1.34097	8.88889	-29.9682	2.17704e-15	7.78364e-12	25.441	ENSRNOG00000047799	Gnb5	G protein subunit beta 5 [Source:RGD Symbol;Acc:620759]
-1.82635	5.65969	-28.7662	4.12076e-15	1.10498e-11	24.7156	ENSRNOG00000016353	Nim1k	NIM1 serine/threonine protein kinase [Source:RGD Symbol;Acc:1308116]
2.69387	9.13928	28.1119	5.89615e-15	1.26484e-11	24.5016	ENSRNOG00000028896	A2m	alpha-2-macroglobulin [Source:RGD Symbol;Acc:2004]
-1.4513	7.16649	-26.4689	1.50367e-14	2.68807e-11	23.6386	ENSRNOG00000011815	Sgk1	serum/glucocorticoid regulated kinase 1 [Source:RGD Symbol;Acc:3668]
-1.43024	9.04175	-24.895	3.89035e-14	5.96113e-11	22.7206	ENSRNOG00000017941	Optn	optineurin [Source:RGD Symbol;Acc:628886]
-1.12028	8.70623	-23.5738	9.04092e-14	1.21216e-10	21.9106	ENSRNOG00000005271	Rapgef5	Rap guanine nucleotide exchange factor 5 [Source:RGD Symbol;Acc:1561668]
-0.9422	8.05445	-22.9224	1.39314e-13	1.49428e-10	21.4931	ENSRNOG00000018225	Tp53inp2	tumor protein p53 inducible nuclear protein 2 [Source:RGD Symbol;Acc:735085]
-1.32692	9.21963	-22.971	1.34836e-13	1.49428e-10	21.5174	ENSRNOG00000001205	Agpat3	1-acylglycerol-3-phosphate O-acyltransferase 3 [Source:RGD Symbol;Acc:1305787]
-1.25701	8.31217	-22.7456	1.56979e-13	1.53069e-10	21.3752	ENSRNOG00000019996	Slc16a1	solute carrier family 16 member 1 [Source:RGD Symbol;Acc:3690]
-1.4573	9.39206	-22.6077	1.72403e-13	1.54099e-10	21.2764	ENSRNOG00000046949	Kcnb1	potassium voltage-gated channel subfamily B member 1 [Source:RGD Symbol;Acc:2954]
1.08293	6.73065	22.2393	2.22027e-13	1.70104e-10	21.023	ENSRNOG00000005003	Ptprn2	protein tyrosine phosphatase, receptor type N2 [Source:RGD Symbol;Acc:61904]
-1.27788	7.1666	-22.2964	2.13439e-13	1.70104e-10	21.0743	ENSRNOG00000004162	Pfkfb2	6-phosphofructo-2-kinase/fructose-2,6-biphosphatase 2 [Source:RGD Symbol;Acc:3309]
-1.07409	7.83848	-21.945	2.7254e-13	1.94885e-10	20.8358	ENSRNOG00000010361	Kif3b	kinesin family member 3B [Source:RGD Symbol;Acc:1306815]
3.33152	8.1465	20.9304	5.63871e-13	2.71724e-10	20.1137	ENSRNOG00000011913	Cp	ceruloplasmin [Source:RGD Symbol;Acc:2387]
2.27994	9.03024	20.8256	6.08976e-13	2.71724e-10	20.04	ENSRNOG00000016460	Clu	clusterin [Source:RGD Symbol;Acc:3907]
1.66845	4.48176	20.8905	5.80627e-13	2.71724e-10	19.7999	ENSRNOG00000002610	Carhsp1	calcium regulated heat stable protein 1 [Source:RGD Symbol;Acc:708415]
1.10308	9.04426	20.7855	6.27239e-13	2.71724e-10	20.0122	ENSRNOG00000016163	Slc1a3	solute carrier family 1 member 3 [Source:RGD Symbol;Acc:3698]
-1.16142	9.10444	-21.0534	5.15413e-13	2.71724e-10	20.2053	ENSRNOG00000059715	Cc2d2a	coiled-coil and C2 domain containing 2A [Source:RGD Symbol;Acc:1561042]
-1.38206	5.8434	-20.7193	6.58663e-13	2.71724e-10	19.9516	ENSRNOG00000030776	Sytl2	synaptotagmin-like 2 [Source:RGD Symbol;Acc:1307647]
-1.46072	7.52011	-21.1969	4.64372e-13	2.71724e-10	20.3102	ENSRNOG00000011042	Pdzph1	PDZ and pleckstrin homology domains 1 [Source:RGD Symbol;Acc:1560925]
-1.55231	8.34247	-20.8594	5.9402e-13	2.71724e-10	20.0667	ENSRNOG00000021056	Kcnj14	potassium inwardly-rectifying channel, subfamily J, member 14 [Source:RGD Symbol;Acc:628872]
-1.76003	10.4141	-21.2989	4.31397e-13	2.71724e-10	20.37	ENSRNOG00000004778	Cnga1	cyclic nucleotide gated channel subunit alpha 1 [Source:RGD Symbol;Acc:621815]
-2.18129	5.19749	-20.7626	6.37925e-13	2.71724e-10	19.942	ENSRNOG00000019005	Pde8a	phosphodiesterase 8A [Source:RGD Symbol;Acc:735125]
-2.47215	5.5362	-21.1261	4.88869e-13	2.71724e-10	20.229	ENSRNOG00000013167	Hmgb2	high mobility group box 2 [Source:RGD Symbol;Acc:69291]
1.59931	4.49461	20.426	8.19443e-13	3.03195e-10	19.5284	ENSRNOG00000058692	Slc26a4	solute carrier family 26 member 4 [Source:RGD Symbol;Acc:3293]
-1.03264	9.65004	-20.4376	8.12328e-13	3.03195e-10	19.7546	ENSRNOG00000003633	Rcvrn	recoverin [Source:RGD Symbol;Acc:620258]
-1.16077	8.32001	-20.4255	8.19751e-13	3.03195e-10	19.7481	ENSRNOG00000016928	Cplx4	complexin 4 [Source:RGD Symbol;Acc:1307643]
-2.08506	7.231	-20.2499	9.35574e-13	3.34499e-10	19.617	ENSRNOG00000019701	C1h11orf98	similar to human chromosome 11 open reading frame 98 [Source:RGD Symbol;Acc:1597339]
-1.4041	9.17876	-20.0335	1.1026e-12	3.81501e-10	19.4532	ENSRNOG00000002142	Cds1	CDP-diacylglycerol synthase 1 [Source:RGD Symbol;Acc:621185]
-0.83327	9.96066	-19.7028	1.42196e-12	4.76624e-10	19.1999	ENSRNOG00000012346	Epb41l2	erythrocyte membrane protein band 4.1-like 2 [Source:RGD Symbol;Acc:1563977]
1.65975	6.69391	19.5013	1.66354e-12	5.407e-10	19.0411	ENSRNOG00000019742	Stat3	signal transducer and activator of transcription 3 [Source:RGD Symbol;Acc:3772]
1.31251	7.82591	19.3426	1.88436e-12	5.86832e-10	18.9206	ENSRNOG00000012840	Sparc	secreted protein acidic and cysteine rich [Source:RGD Symbol;Acc:3742]
-0.920865	8.5241	-19.3222	1.91489e-12	5.86832e-10	18.9044	ENSRNOG00000060544	Kdm5b	lysine demethylase 5B [Source:RGD Symbol;Acc:1565602]
-0.998217	8.40624	-19.139	2.21412e-12	6.39102e-10	18.7594	ENSRNOG00000049361	Gas7	growth arrest specific 7 [Source:RGD Symbol;Acc:621550]
-1.26421	6.30717	-19.1125	2.26148e-12	6.39102e-10	18.7392	ENSRNOG00000030069	Faim	Fas apoptotic inhibitory molecule [Source:RGD Symbol;Acc:620572]
-1.32936	6.69107	-19.111	2.26421e-12	6.39102e-10	18.7379	ENSRNOG00000011071	Nt5e	5' nucleotidase, ecto [Source:RGD Symbol;Acc:61956]
-1.11391	8.57974	-18.8722	2.74198e-12	7.35261e-10	18.5459	ENSRNOG00000021793	Tlcd5	TLC domain containing 5 [Source:RGD Symbol;Acc:1565079]
-1.54232	6.40264	-18.8808	2.72295e-12	7.35261e-10	18.5546	ENSRNOG00000049517	Tnfaip3	TNF alpha induced protein 3 [Source:RGD Symbol;Acc:1589275]
-3.43288	2.06931	-18.692	3.17284e-12	8.30046e-10	16.1009	ENSRNOG00000011277	Btg4	BTG anti-proliferation factor 4 [Source:RGD Symbol;Acc:1308809]
0.801429	7.18203	18.56	3.53383e-12	9.02472e-10	18.2932	ENSRNOG00000019549	Akap12	A-kinase anchoring protein 12 [Source:RGD Symbol;Acc:70988]
-2.00582	8.83731	-18.2611	4.52226e-12	1.12804e-09	18.0462	ENSRNOG00000059237	Clul1	clusterin like 1 [Source:RGD Symbol;Acc:1306852]
-0.931694	9.25216	-17.9861	5.69258e-12	1.3877e-09	17.8157	ENSRNOG00000011809	Rpgrip1	RPGR interacting protein 1 [Source:RGD Symbol;Acc:1310807]
-0.812201	6.50661	-17.948	5.87842e-12	1.40115e-09	17.7834	ENSRNOG00000010086	Plagl2	PLAG1 like zinc finger 2 [Source:RGD Symbol;Acc:1307999]
1.67766	5.85861	17.8574	6.34665e-12	1.47987e-09	17.71	ENSRNOG00000016753	Slc14a1	solute carrier family 14 member 1 (Kidd blood group) [Source:RGD Symbol;Acc:3688]
-0.828864	6.01844	-17.7987	6.67144e-12	1.51701e-09	17.6616	ENSRNOG00000015774	Mreg	melanoregulin [Source:RGD Symbol;Acc:1562333]
-1.28779	6.15861	-17.7782	6.78879e-12	1.51701e-09	17.644	ENSRNOG00000061348	Fam53b	family with sequence similarity 53, member B [Source:RGD Symbol;Acc:1310799]
-0.89911	6.54838	-17.5683	8.12609e-12	1.77878e-09	17.4597	ENSRNOG00000015189	Bbs9	Bardet-Biedl syndrome 9 [Source:RGD Symbol;Acc:1308472]
-1.00813	8.78619	-17.4655	8.8798e-12	1.9049e-09	17.3671	ENSRNOG00000013479	Stard7	StAR-related lipid transfer domain containing 7 [Source:RGD Symbol;Acc:1307613]
-0.754275	8.39132	-17.3795	9.56748e-12	2.01217e-09	17.2904	ENSRNOG00000048898	Wasf3	WASP family member 3 [Source:RGD Symbol;Acc:1592807]
-0.871586	7.64348	-17.3453	9.85715e-12	2.01841e-09	17.259	ENSRNOG00000043498	Sik2	salt-inducible kinase 2 [Source:RGD Symbol;Acc:1559698]
-1.07437	8.88986	-17.29	1.03435e-11	2.01841e-09	17.214	ENSRNOG00000046741	Itsn2	intersectin 2 [Source:RGD Symbol;Acc:1590890]
-1.5101	11.8341	-17.3144	1.01261e-11	2.01841e-09	17.2484	ENSRNOG00000002517	Pdc	phosducin [Source:RGD Symbol;Acc:3277]
-1.81144	5.27095	-17.2893	1.03498e-11	2.01841e-09	17.227	ENSRNOG00000059055	Hsbp1l1	heat shock factor binding protein 1-like 1 [Source:RGD Symbol;Acc:2301798]
-1.43364	5.32399	-17.0128	1.32008e-11	2.52842e-09	16.985	ENSRNOG00000022268	Pnpla3	patatin-like phospholipase domain containing 3 [Source:RGD Symbol;Acc:1595843]
-0.814129	6.57564	-16.8962	1.4644e-11	2.75563e-09	16.864	ENSRNOG00000006067	Aifm1	apoptosis inducing factor, mitochondria associated 1 [Source:RGD Symbol;Acc:620817]
-1.08789	6.96403	-16.7175	1.71873e-11	3.17847e-09	16.7004	ENSRNOG00000007323	Ric8b	RIC8 guanine nucleotide exchange factor B [Source:RGD Symbol;Acc:631419]
-0.869529	7.81216	-16.5704	1.96313e-11	3.56891e-09	16.5632	ENSRNOG00000006689	Chd7	chromodomain helicase DNA binding protein 7 [Source:RGD Symbol;Acc:1311921]
-1.3835	4.33023	-16.525	2.04584e-11	3.65728e-09	16.5276	ENSRNOG00000025946	Igf2bp2	insulin-like growth factor 2 mRNA binding protein 2 [Source:RGD Symbol;Acc:1305614]
-0.966491	8.20102	-16.4319	2.22726e-11	3.91633e-09	16.4362	ENSRNOG00000007764	Frmd4b	FERM domain containing 4B [Source:RGD Symbol;Acc:620172]
2.62654	3.97984	16.2825	2.55474e-11	4.4197e-09	15.8441	ENSRNOG00000002520	Litaf	lipopolysaccharide-induced TNF factor [Source:RGD Symbol;Acc:69294]
-0.784411	8.65266	-16.2314	2.67817e-11	4.5597e-09	16.251	ENSRNOG00000001072	Cers4	ceramide synthase 4 [Source:RGD Symbol;Acc:1309303]
1.87333	3.45166	16.1956	2.76839e-11	4.63964e-09	15.7512	ENSRNOG00000014797	Tmbim1	transmembrane BAX inhibitor motif containing 1 [Source:RGD Symbol;Acc:1359409]
-0.998348	7.16645	-16.1653	2.8471e-11	4.69815e-09	16.1877	ENSRNOG00000019086	Gucy2f	guanylate cyclase 2F [Source:RGD Symbol;Acc:620439]
-0.928285	9.0906	-16.0534	3.15968e-11	5.13497e-09	16.0864	ENSRNOG00000012479	Impg1	interphotoreceptor matrix proteoglycan 1 [Source:RGD Symbol;Acc:620499]
-2.56536	4.54511	-15.983	3.37501e-11	5.40304e-09	16.0029	ENSRNOG00000011648	Aqp1	aquaporin 1 [Source:RGD Symbol;Acc:2141]
-1.00774	7.24845	-15.5954	4.87273e-11	7.68602e-09	15.6399	ENSRNOG00000055382	Hcn1	hyperpolarization-activated cyclic nucleotide-gated potassium channel 1 [Source:RGD Symbol;Acc:620688]
-3.18647	3.66769	-15.5335	5.17119e-11	8.03858e-09	15.5706	ENSRNOG00000028311	Cnpy1	canopy FGF signaling regulator 1 [Source:RGD Symbol;Acc:1583296]
-0.865526	6.43506	-15.4658	5.51987e-11	8.45801e-09	15.5249	ENSRNOG00000036576	Zdhhc6	zinc finger DHHC-type palmitoyltransferase 6 [Source:RGD Symbol;Acc:1304657]
-0.876505	8.06291	-15.3349	6.26568e-11	9.46559e-09	15.3848	ENSRNOG00000024085	Tmem237	transmembrane protein 237 [Source:RGD Symbol;Acc:1306705]
0.75995	6.17053	15.2953	6.51205e-11	9.56825e-09	15.3725	ENSRNOG00000014613	Ddah1	dimethylarginine dimethylaminohydrolase 1 [Source:RGD Symbol;Acc:70968]
-1.5066	6.07338	-15.3001	6.48199e-11	9.56825e-09	15.3766	ENSRNOG00000015499	Serinc4	serine incorporator 4 [Source:RGD Symbol;Acc:1566077]
-0.562661	8.49803	-15.2332	6.91904e-11	1.00289e-08	15.2857	ENSRNOG00000014846	Anp32a	acidic nuclear phosphoprotein 32 family member A [Source:RGD Symbol;Acc:11508551]
1.59773	7.91987	15.1854	7.2508e-11	1.03696e-08	15.2386	ENSRNOG00000017123	B2m	beta-2 microglobulin [Source:RGD Symbol;Acc:2189]
3.38584	3.77446	15.1468	7.53105e-11	1.06287e-08	14.729	ENSRNOG00000033192	Osmr	oncostatin M receptor [Source:RGD Symbol;Acc:1302983]
1.43958	4.23935	15.1095	7.81297e-11	1.08834e-08	15.1715	ENSRNOG00000020667	Shisa5	shisa family member 5 [Source:RGD Symbol;Acc:1359661]
0.743542	6.11968	15.0946	7.92802e-11	1.0902e-08	15.1761	ENSRNOG00000014276	Plce1	phospholipase C, epsilon 1 [Source:RGD Symbol;Acc:69424]
-1.63662	5.45663	-15.0809	8.03637e-11	1.09112e-08	15.1801	ENSRNOG00000056553	Rdh12	retinol dehydrogenase 12 [Source:RGD Symbol;Acc:1310462]
1.10573	5.87061	14.987	8.81862e-11	1.1329e-08	15.0782	ENSRNOG00000013526	Rassf4	Ras association domain family member 4 [Source:RGD Symbol;Acc:1307785]
0.917017	4.28118	14.9809	8.87225e-11	1.1329e-08	15.0688	ENSRNOG00000053607	Fam217b	family with sequence similarity 217, member B [Source:RGD Symbol;Acc:1311952]
0.730182	5.00457	15.0269	8.47672e-11	1.1329e-08	15.1384	ENSRNOG00000011032	Lhfpl2	LHFPL tetraspan subfamily member 2 [Source:RGD Symbol;Acc:1309869]
-1.13741	9.46981	-15.0047	8.66479e-11	1.1329e-08	15.0656	ENSRNOG00000007304	Herc3	HECT and RLD domain containing E3 ubiquitin protein ligase 3 [Source:RGD Symbol;Acc:1307803]
-1.19635	7.11489	-14.9908	8.78507e-11	1.1329e-08	15.0464	ENSRNOG00000017022	Cerk	ceramide kinase [Source:RGD Symbol;Acc:1305019]
2.21392	6.68763	14.9664	9.00093e-11	1.13581e-08	15.0615	ENSRNOG00000048088	Mest	mesoderm specific transcript [Source:RGD Symbol;Acc:1594589]
-0.876925	7.15933	-14.874	9.86884e-11	1.23085e-08	14.9213	ENSRNOG00000016172	Ric1	RIC1 homolog, RAB6A GEF complex partner 1 [Source:RGD Symbol;Acc:1310016]
-1.27478	6.24728	-14.8397	1.02125e-10	1.25907e-08	14.9026	ENSRNOG00000007443	Jag1	jagged canonical Notch ligand 1 [Source:RGD Symbol;Acc:2937]
1.53859	5.48014	14.825	1.03641e-10	1.26324e-08	14.9321	ENSRNOG00000010997	Ednrb	endothelin receptor type B [Source:RGD Symbol;Acc:2536]
-1.43961	10.6534	-14.7743	1.09047e-10	1.3142e-08	14.8464	ENSRNOG00000016638	Gnb1	G protein subunit beta 1 [Source:RGD Symbol;Acc:2718]
2.40515	5.37744	14.7075	1.16641e-10	1.3901e-08	14.8208	ENSRNOG00000053272	Chi3l1	chitinase 3 like 1 [Source:RGD Symbol;Acc:620874]
0.973367	5.38247	14.5546	1.3618e-10	1.58768e-08	14.6549	ENSRNOG00000007177	Poglut3	protein O-glucosyltransferase 3 [Source:RGD Symbol;Acc:1562027]
-0.720211	5.55772	-14.5644	1.34825e-10	1.58768e-08	14.6471	ENSRNOG00000019346	NA	NA
-0.85921	8.49243	-14.5035	1.43457e-10	1.63694e-08	14.5424	ENSRNOG00000014562	Hnrnpf	heterogeneous nuclear ribonucleoprotein F [Source:RGD Symbol;Acc:620366]
-4.01173	2.47296	-14.512	1.4222e-10	1.63694e-08	12.9563	ENSRNOG00000006860	Itk	IL2-inducible T-cell kinase [Source:RGD Symbol;Acc:1311618]
-0.997257	7.69551	-14.4306	1.54581e-10	1.7453e-08	14.4626	ENSRNOG00000000895	Rabgef1	RAB guanine nucleotide exchange factor 1 [Source:RGD Symbol;Acc:1307295]
-0.979419	4.61209	-14.387	1.6166e-10	1.80118e-08	14.4955	ENSRNOG00000025704	Yod1	YOD1 deubiquitinase [Source:RGD Symbol;Acc:1359726]
-1.38988	3.35275	-14.3796	1.62889e-10	1.80118e-08	14.4452	ENSRNOG00000008775	Lrguk	leucine-rich repeats and guanylate kinase domain containing [Source:RGD Symbol;Acc:1308226]
0.632483	5.93458	14.2557	1.85106e-10	2.02596e-08	14.3234	ENSRNOG00000018683	Dock1	dedicator of cyto-kinesis 1 [Source:RGD Symbol;Acc:1566072]
1.84151	6.92693	14.2383	1.88493e-10	2.0422e-08	14.299	ENSRNOG00000032871	Mlc1	modulator of VRAC current 1 [Source:RGD Symbol;Acc:1308552]
-0.72944	8.26561	-14.2147	1.93153e-10	2.06293e-08	14.2369	ENSRNOG00000026171	Bbs4	Bardet-Biedl syndrome 4 [Source:RGD Symbol;Acc:1309134]
-1.45009	10.427	-14.2093	1.94253e-10	2.06293e-08	14.2566	ENSRNOG00000000065	Pde6b	phosphodiesterase 6B [Source:RGD Symbol;Acc:1311039]
-0.804271	8.64969	-14.1755	2.01194e-10	2.11569e-08	14.1977	ENSRNOG00000012820	Add3	adducin 3 [Source:RGD Symbol;Acc:2043]
2.62479	2.74997	14.1567	2.05187e-10	2.13674e-08	12.6942	ENSRNOG00000055251	Prtg	protogenin [Source:RGD Symbol;Acc:1307157]
-1.61508	4.44557	-14.1042	2.16748e-10	2.23542e-08	14.2086	ENSRNOG00000013728	Polg2	DNA polymerase gamma 2, accessory subunit [Source:RGD Symbol;Acc:1305128]
3.11214	3.86444	13.9731	2.48746e-10	2.541e-08	13.594	ENSRNOG00000005229	Sec16b	SEC16 homolog B, endoplasmic reticulum export factor [Source:RGD Symbol;Acc:621658]
-2.01441	7.47375	-13.9629	2.51414e-10	2.54402e-08	13.9753	ENSRNOG00000061572	Smarcd1	SWI/SNF related, matrix associated, actin dependent regulator of chromatin, subfamily d, member 1 [Source:RGD Symbol;Acc:1305406]
1.38275	6.9274	13.897	2.69564e-10	2.70219e-08	13.9107	ENSRNOG00000014787	Cabp5	calcium binding protein 5 [Source:RGD Symbol;Acc:1308108]
-0.605265	6.81002	-13.856	2.81549e-10	2.7962e-08	13.8563	ENSRNOG00000012763	Cwf19l1	CWF19 like cell cycle control factor 1 [Source:RGD Symbol;Acc:1304716]
-1.36732	3.47246	-13.7541	3.13847e-10	3.08837e-08	13.8303	ENSRNOG00000026056	Ccnb1ip1	cyclin B1 interacting protein 1 [Source:RGD Symbol;Acc:1561930]
1.19044	4.60957	13.6745	3.41777e-10	3.33264e-08	13.7576	ENSRNOG00000010697	Hadh	hydroxyacyl-CoA dehydrogenase [Source:RGD Symbol;Acc:69321]
-4.35152	0.545022	-13.6581	3.47857e-10	3.36136e-08	9.13039	ENSRNOG00000061244	NA	NA
0.620353	6.25832	13.6353	3.56473e-10	3.41387e-08	13.639	ENSRNOG00000013072	Plxna4	plexin A4 [Source:RGD Symbol;Acc:1308074]
1.03164	7.1606	13.5833	3.77068e-10	3.5169e-08	13.5626	ENSRNOG00000018087	Vim	vimentin [Source:RGD Symbol;Acc:621646]
-0.896925	6.32723	-13.587	3.75557e-10	3.5169e-08	13.573	ENSRNOG00000047427	Cdan1	codanin 1 [Source:RGD Symbol;Acc:1306771]
-1.66737	6.10162	-13.5867	3.75688e-10	3.5169e-08	13.6033	ENSRNOG00000005957	Slc4a7	solute carrier family 4 member 7 [Source:RGD Symbol;Acc:621208]
-0.783686	5.99243	-13.5691	3.82893e-10	3.54044e-08	13.5661	ENSRNOG00000045654	Hspa1a	heat shock protein family A (Hsp70) member 1A [Source:RGD Symbol;Acc:2840]
-1.06958	7.30664	-13.5433	3.9373e-10	3.57894e-08	13.5052	ENSRNOG00000014713	Csgalnact2	chondroitin sulfate N-acetylgalactosaminyltransferase 2 [Source:RGD Symbol;Acc:1563660]
-1.42628	4.52167	-13.5447	3.93139e-10	3.57894e-08	13.6163	ENSRNOG00000038825	Fabp12	fatty acid binding protein 12 [Source:RGD Symbol;Acc:1565000]
1.61944	5.26867	13.5038	4.10958e-10	3.67328e-08	13.5651	ENSRNOG00000014961	Pdpn	podoplanin [Source:RGD Symbol;Acc:61819]
0.724404	9.43224	13.5045	4.10658e-10	3.67328e-08	13.4751	ENSRNOG00000018651	Agtpbp1	ATP/GTP binding carboxypeptidase 1 [Source:RGD Symbol;Acc:1306307]
1.52873	4.91487	13.4856	4.19136e-10	3.71541e-08	13.5479	ENSRNOG00000033321	Hmgb2l1	high mobility group box 2-like 1 [Source:RGD Symbol;Acc:1564519]
1.46092	4.53791	13.4662	4.28096e-10	3.76373e-08	13.5346	ENSRNOG00000029184	Epha6	Eph receptor A6 [Source:RGD Symbol;Acc:1304614]
-1.03308	6.51999	-13.4547	4.33463e-10	3.77993e-08	13.4187	ENSRNOG00000000323	Prdm1	PR/SET domain 1 [Source:RGD Symbol;Acc:1311765]
-0.559647	6.71263	-13.412	4.54157e-10	3.88869e-08	13.366	ENSRNOG00000022015	Cntrl	centriolin [Source:RGD Symbol;Acc:1305317]
-0.821572	8.4928	-13.3994	4.60436e-10	3.88869e-08	13.3494	ENSRNOG00000012495	Podxl	podocalyxin-like [Source:RGD Symbol;Acc:621878]
-0.988369	8.56135	-13.4064	4.56934e-10	3.88869e-08	13.3576	ENSRNOG00000012566	Kcnv2	potassium voltage-gated channel modifier subfamily V member 2 [Source:RGD Symbol;Acc:1309271]
-1.33891	6.79361	-13.4174	4.51495e-10	3.88869e-08	13.3829	ENSRNOG00000050949	Ttc39c	tetratricopeptide repeat domain 39C [Source:RGD Symbol;Acc:1585423]
-0.830211	6.03056	-13.3746	4.73084e-10	3.9643e-08	13.3531	ENSRNOG00000052204	Tbc1d24	TBC1 domain family, member 24 [Source:RGD Symbol;Acc:1306143]
1.42236	5.59795	13.3589	4.81286e-10	4.00176e-08	13.3944	ENSRNOG00000014524	S1pr3	sphingosine-1-phosphate receptor 3 [Source:RGD Symbol;Acc:1583843]
-1.07999	4.4599	-13.2843	5.22404e-10	4.31024e-08	13.3234	ENSRNOG00000010888	Ankrd33b	ankyrin repeat domain 33B [Source:RGD Symbol;Acc:1564227]
0.719147	7.97279	13.2106	5.66644e-10	4.60441e-08	13.1343	ENSRNOG00000011918	Vsx2	visual system homeobox 2 [Source:RGD Symbol;Acc:621215]
-1.31365	7.75921	-13.2106	5.66633e-10	4.60441e-08	13.1325	ENSRNOG00000007172	Map4k3	mitogen-activated protein kinase kinase kinase kinase 3 [Source:RGD Symbol;Acc:621280]
-0.659236	8.47412	-13.1907	5.79262e-10	4.67155e-08	13.1131	ENSRNOG00000007393	Ndrg1	N-myc downstream regulated 1 [Source:RGD Symbol;Acc:1307303]
-0.846206	9.05856	-13.142	6.11411e-10	4.89403e-08	13.0637	ENSRNOG00000004464	Sel1l	SEL1L adaptor subunit of ERAD E3 ubiquitin ligase [Source:RGD Symbol;Acc:620147]
0.907158	6.48236	13.1277	6.21219e-10	4.9357e-08	13.0674	ENSRNOG00000057569	Ahnak	AHNAK nucleoprotein [Source:RGD Symbol;Acc:619779]
0.712076	4.93327	13.0697	6.62687e-10	5.22646e-08	13.0763	ENSRNOG00000019490	Slc20a2	solute carrier family 20 member 2 [Source:RGD Symbol;Acc:3699]
-0.647736	5.24583	-13.031	6.91987e-10	5.37844e-08	12.997	ENSRNOG00000004927	Supt7l	SPT7 like, STAGA complex subunit gamma [Source:RGD Symbol;Acc:1562206]
-1.01351	6.66803	-13.035	6.88893e-10	5.37844e-08	12.9383	ENSRNOG00000010309	Nfyb	nuclear transcription factor Y subunit beta [Source:RGD Symbol;Acc:3172]
0.998663	3.49174	13.0139	7.05332e-10	5.44273e-08	12.9993	ENSRNOG00000053869	Ppp1r3d	protein phosphatase 1, regulatory subunit 3D [Source:RGD Symbol;Acc:1586306]
-0.712599	7.31556	-12.9746	7.37143e-10	5.60752e-08	12.8617	ENSRNOG00000052934	Nol11	nucleolar protein 11 [Source:RGD Symbol;Acc:1584081]
-0.941467	6.91522	-12.9763	7.35712e-10	5.60752e-08	12.8661	ENSRNOG00000015582	Me2	malic enzyme 2 [Source:RGD Symbol;Acc:1310321]
1.30939	4.81459	12.9292	7.7572e-10	5.85942e-08	12.9306	ENSRNOG00000004448	Acss3	acyl-CoA synthetase short-chain family member 3 [Source:RGD Symbol;Acc:1307051]
-1.12948	7.72347	-12.8951	8.06086e-10	6.04621e-08	12.7737	ENSRNOG00000017405	Raly	RALY heterogeneous nuclear ribonucleoprotein [Source:RGD Symbol;Acc:1307228]
-0.862802	6.74161	-12.8602	8.38519e-10	6.24581e-08	12.7396	ENSRNOG00000029131	Frmpd2	FERM and PDZ domain containing 2 [Source:RGD Symbol;Acc:1565652]
-0.695747	5.56869	-12.8524	8.45936e-10	6.2576e-08	12.7703	ENSRNOG00000038200	Rttn	rotatin [Source:RGD Symbol;Acc:1306706]
-0.605364	5.48936	-12.8359	8.61904e-10	6.33204e-08	12.7597	ENSRNOG00000051420	Cables2	Cdk5 and Abl enzyme substrate 2 [Source:RGD Symbol;Acc:1310089]
2.50434	3.57166	12.7873	9.10769e-10	6.64551e-08	12.4444	ENSRNOG00000005177	Cryzl2	crystallin zeta like 2 [Source:RGD Symbol;Acc:1304982]
-1.0949	6.71643	-12.7619	9.37519e-10	6.79448e-08	12.6196	ENSRNOG00000028623	Agpat5	1-acylglycerol-3-phosphate O-acyltransferase 5 [Source:RGD Symbol;Acc:1306405]
-1.24719	10.2525	-12.7188	9.84727e-10	7.08872e-08	12.5959	ENSRNOG00000009773	Elovl4	ELOVL fatty acid elongase 4 [Source:RGD Symbol;Acc:1305630]
-0.750921	7.86562	-12.7106	9.93979e-10	7.10761e-08	12.5547	ENSRNOG00000002338	Dgke	diacylglycerol kinase epsilon [Source:RGD Symbol;Acc:1560914]
-0.823136	4.03189	-12.7031	1.00251e-09	7.12115e-08	12.6887	ENSRNOG00000042580	Zfp866	zinc finger protein 866 [Source:RGD Symbol;Acc:2318899]
-1.04581	6.43696	-12.6803	1.02903e-09	7.24721e-08	12.5304	ENSRNOG00000007596	Rffl	ring finger and FYVE-like domain containing E3 ubiquitin protein ligase [Source:RGD Symbol;Acc:727916]
-1.26714	7.75346	-12.675	1.03534e-09	7.24721e-08	12.5129	ENSRNOG00000002054	Glmn	glomulin, FKBP associated protein [Source:RGD Symbol;Acc:1588600]
-1.38342	4.31664	-12.6706	1.04053e-09	7.24721e-08	12.6355	ENSRNOG00000048071	LOC100911776	coiled-coil domain-containing protein 89-like [Source:RGD Symbol;Acc:6490972]
-0.545613	6.94224	-12.6518	1.06318e-09	7.31007e-08	12.4908	ENSRNOG00000007324	Plxna2	plexin A2 [Source:RGD Symbol;Acc:1305325]
-3.39842	2.70486	-12.6557	1.05845e-09	7.31007e-08	12.3791	ENSRNOG00000027331	Ppef1	protein phosphatase with EF-hand domain 1 [Source:RGD Symbol;Acc:1562772]
-1.38617	3.13474	-12.6322	1.08739e-09	7.42886e-08	12.5918	ENSRNOG00000022509	NA	NA
-1.69059	12.1068	-12.6171	1.10642e-09	7.51104e-08	12.5156	ENSRNOG00000008807	Rp1	RP1, axonemal microtubule associated [Source:RGD Symbol;Acc:1596713]
-0.799532	7.54647	-12.5158	1.24342e-09	8.38801e-08	12.3237	ENSRNOG00000005480	Ybx3	Y box binding protein 3 [Source:RGD Symbol;Acc:621056]
0.851186	5.79221	12.4834	1.29105e-09	8.65485e-08	12.3604	ENSRNOG00000011775	Mfap3l	microfibril associated protein 3 like [Source:RGD Symbol;Acc:1311274]
-0.562164	7.79191	-12.4185	1.39211e-09	9.27442e-08	12.2079	ENSRNOG00000010633	Acsl1	acyl-CoA synthetase long-chain family member 1 [Source:RGD Symbol;Acc:2015]
-0.996774	7.6534	-12.3951	1.43059e-09	9.47195e-08	12.1807	ENSRNOG00000006832	Zdhhc5	zinc finger DHHC-type palmitoyltransferase 5 [Source:RGD Symbol;Acc:1589737]
0.624011	5.27379	12.38	1.45614e-09	9.58193e-08	12.2633	ENSRNOG00000002347	Rgl1	ral guanine nucleotide dissociation stimulator,-like 1 [Source:RGD Symbol;Acc:1308947]
0.56592	8.19334	12.2134	1.77056e-09	1.15799e-07	11.9628	ENSRNOG00000033280	Pam	peptidylglycine alpha-amidating monooxygenase [Source:RGD Symbol;Acc:3252]
0.536487	6.67667	12.1842	1.83277e-09	1.19141e-07	11.9503	ENSRNOG00000050206	Shank2	SH3 and multiple ankyrin repeat domains 2 [Source:RGD Symbol;Acc:628772]
0.67944	5.29526	12.1261	1.96344e-09	1.26867e-07	11.9595	ENSRNOG00000010680	Med12l	mediator complex subunit 12L [Source:RGD Symbol;Acc:1592212]
1.201	5.12575	12.0935	2.04117e-09	1.31099e-07	11.9445	ENSRNOG00000014064	Ctsh	cathepsin H [Source:RGD Symbol;Acc:2447]
2.76589	3.33455	12.0721	2.09376e-09	1.33676e-07	11.7775	ENSRNOG00000014504	Il1r1	interleukin 1 receptor type 1 [Source:RGD Symbol;Acc:2892]
-0.825416	5.44584	-12.0574	2.13074e-09	1.34437e-07	11.8465	ENSRNOG00000059461	B4galt1	beta-1,4-galactosyltransferase 1 [Source:RGD Symbol;Acc:620900]
-0.827238	5.48671	-12.0606	2.12258e-09	1.34437e-07	11.8496	ENSRNOG00000015285	Lrp4	LDL receptor related protein 4 [Source:RGD Symbol;Acc:619731]
-0.769336	7.82259	-12.0389	2.1783e-09	1.36634e-07	11.747	ENSRNOG00000039980	Slc25a5	solute carrier family 25 member 5 [Source:RGD Symbol;Acc:620353]
0.719356	5.39961	12.0092	2.25704e-09	1.40486e-07	11.8003	ENSRNOG00000017879	Gab1	GRB2-associated binding protein 1 [Source:RGD Symbol;Acc:1311085]
-0.777869	5.01705	-12.0059	2.26591e-09	1.40486e-07	11.8103	ENSRNOG00000036842	Smug1	single-strand-selective monofunctional uracil-DNA glycosylase 1 [Source:RGD Symbol;Acc:631403]
0.852329	4.80791	11.9676	2.37246e-09	1.46139e-07	11.8063	ENSRNOG00000019018	Plat	plasminogen activator, tissue type [Source:RGD Symbol;Acc:3342]
-0.886416	9.07045	-11.9635	2.38433e-09	1.46139e-07	11.6655	ENSRNOG00000007286	Mdm1	Mdm1 nuclear protein [Source:RGD Symbol;Acc:1561092]
0.902569	4.05893	11.9198	2.51271e-09	1.53132e-07	11.7857	ENSRNOG00000014966	LOC690000	similar to CG3740-PA [Source:RGD Symbol;Acc:1585208]
0.92267	4.53463	11.8878	2.61158e-09	1.58259e-07	11.7234	ENSRNOG00000003972	Tshr	thyroid stimulating hormone receptor [Source:RGD Symbol;Acc:3911]
3.27943	3.26757	11.853	2.72396e-09	1.63225e-07	11.2599	ENSRNOG00000031743	Gbp2	guanylate binding protein 2 [Source:RGD Symbol;Acc:621810]
1.60986	4.9508	11.8574	2.7093e-09	1.63225e-07	11.6902	ENSRNOG00000000723	NA	NA
0.571753	8.33671	11.8421	2.76008e-09	1.6447e-07	11.5054	ENSRNOG00000013484	Gsta1	glutathione S-transferase alpha 1 [Source:RGD Symbol;Acc:2753]
-1.51721	7.05812	-11.8075	2.87815e-09	1.70558e-07	11.4632	ENSRNOG00000009019	Slc6a6	solute carrier family 6 member 6 [Source:RGD Symbol;Acc:61912]
3.86401	3.98529	11.7411	3.12012e-09	1.83881e-07	11.1436	ENSRNOG00000011971	C1s	complement C1s [Source:RGD Symbol;Acc:619983]
-0.585113	10.1504	-11.7326	3.15269e-09	1.84786e-07	11.3958	ENSRNOG00000016047	Macf1	microtubule-actin crosslinking factor 1 [Source:RGD Symbol;Acc:1306057]
0.483251	7.64881	11.7277	3.17161e-09	1.84884e-07	11.3616	ENSRNOG00000058003	Spon1	spondin 1 [Source:RGD Symbol;Acc:619918]
1.70458	7.31353	11.7215	3.19577e-09	1.85286e-07	11.39	ENSRNOG00000061215	Crym	crystallin, mu [Source:RGD Symbol;Acc:620943]
2.05893	2.91525	11.6251	3.5964e-09	2.07392e-07	11.1366	ENSRNOG00000057989	Zp2	zona pellucida glycoprotein 2 [Source:RGD Symbol;Acc:620605]
1.11925	3.94312	11.6	3.70887e-09	2.12735e-07	11.4004	ENSRNOG00000005478	Fkbp9	FKBP prolyl isomerase 9 [Source:RGD Symbol;Acc:1549757]
-1.20581	7.27362	-11.5834	3.78571e-09	2.15987e-07	11.1774	ENSRNOG00000010780	Dlc1	DLC1 Rho GTPase activating protein [Source:RGD Symbol;Acc:68416]
1.60294	4.5383	11.578	3.81076e-09	2.16265e-07	11.3521	ENSRNOG00000013948	Zc3hav1	zinc finger CCCH-type containing, antiviral 1 [Source:RGD Symbol;Acc:628694]
-0.691792	7.03404	-11.5732	3.83372e-09	2.16424e-07	11.1709	ENSRNOG00000012146	Pomt2	protein-O-mannosyltransferase 2 [Source:RGD Symbol;Acc:1586427]
-0.557975	6.32164	-11.5476	3.95665e-09	2.22194e-07	11.1627	ENSRNOG00000056658	Xylt1	xylosyltransferase 1 [Source:RGD Symbol;Acc:620093]
-0.982845	6.03167	-11.4893	4.25278e-09	2.3758e-07	11.1115	ENSRNOG00000006002	Stk35	serine/threonine kinase 35 [Source:RGD Symbol;Acc:1310247]
-1.2427	5.93526	-11.4692	4.36006e-09	2.42311e-07	11.065	ENSRNOG00000008986	Diaph3	diaphanous-related formin 3 [Source:RGD Symbol;Acc:1593287]
-0.72685	8.46442	-11.4637	4.39017e-09	2.42727e-07	11.0289	ENSRNOG00000017930	Lpcat1	lysophosphatidylcholine acyltransferase 1 [Source:RGD Symbol;Acc:1311599]
-0.756625	6.08473	-11.4595	4.41299e-09	2.42737e-07	11.046	ENSRNOG00000010950	Cep41	centrosomal protein 41 [Source:RGD Symbol;Acc:1562034]
-1.01398	7.11354	-11.4428	4.5058e-09	2.46578e-07	10.9979	ENSRNOG00000010137	Xpo4	exportin 4 [Source:RGD Symbol;Acc:1312015]
-0.776199	6.57818	-11.3943	4.78616e-09	2.60591e-07	10.945	ENSRNOG00000000802	Tbc1d32	TBC1 domain family, member 32 [Source:RGD Symbol;Acc:2323599]
1.24134	6.73635	11.3867	4.83205e-09	2.60728e-07	10.9527	ENSRNOG00000001607	Adamts1	ADAM metallopeptidase with thrombospondin type 1 motif, 1 [Source:RGD Symbol;Acc:621241]
0.814296	4.69153	11.3858	4.83729e-09	2.60728e-07	11.0872	ENSRNOG00000024651	Greb1	growth regulating estrogen receptor binding 1 [Source:RGD Symbol;Acc:1564091]
0.650442	6.64639	11.3725	4.91833e-09	2.6377e-07	10.929	ENSRNOG00000009037	Sulf1	sulfatase 1 [Source:RGD Symbol;Acc:708554]
1.06078	3.88991	11.3352	5.15379e-09	2.74796e-07	11.0762	ENSRNOG00000043304	Apcdd1	APC down-regulated 1 [Source:RGD Symbol;Acc:1589962]
0.49888	6.96292	11.3319	5.17515e-09	2.74796e-07	10.871	ENSRNOG00000009049	Usp11	ubiquitin specific peptidase 11 [Source:RGD Symbol;Acc:1303052]
0.602392	6.20052	11.3189	5.26049e-09	2.77951e-07	10.8936	ENSRNOG00000000940	Flt1	Fms related receptor tyrosine kinase 1 [Source:RGD Symbol;Acc:2621]
3.30629	1.34529	11.2884	5.46587e-09	2.87018e-07	7.85583	ENSRNOG00000024952	Atp8b1	ATPase phospholipid transporting 8B1 [Source:RGD Symbol;Acc:1308488]
-0.881751	6.18587	-11.2823	5.50777e-09	2.87018e-07	10.8189	ENSRNOG00000000609	Ipmk	inositol polyphosphate multikinase [Source:RGD Symbol;Acc:620954]
-0.945214	7.13273	-11.2817	5.51236e-09	2.87018e-07	10.7888	ENSRNOG00000008618	Tex10	testis expressed 10 [Source:RGD Symbol;Acc:1312045]
-0.855291	5.08955	-11.271	5.58676e-09	2.89486e-07	10.8779	ENSRNOG00000012514	Abhd17b	abhydrolase domain containing 17B, depalmitoylase [Source:RGD Symbol;Acc:1305246]
0.683388	4.53011	11.2568	5.68788e-09	2.91967e-07	10.9289	ENSRNOG00000045668	Ifnar2	interferon alpha and beta receptor subunit 2 [Source:RGD Symbol;Acc:1583177]
-0.765892	4.77547	-11.2528	5.71631e-09	2.91967e-07	10.8787	ENSRNOG00000009851	Slc38a9	solute carrier family 38, member 9 [Source:RGD Symbol;Acc:1311881]
-0.894702	6.69131	-11.2545	5.70417e-09	2.91967e-07	10.7653	ENSRNOG00000042821	Cd59	CD59 molecule [Source:RGD Symbol;Acc:2311]
0.803964	4.99358	11.2318	5.8697e-09	2.96974e-07	10.8891	ENSRNOG00000011150	Arsb	arylsulfatase B [Source:RGD Symbol;Acc:2158]
0.78035	5.0905	11.233	5.86109e-09	2.96974e-07	10.8616	ENSRNOG00000004466	Fam210b	family with sequence similarity 210, member B [Source:RGD Symbol;Acc:1311378]
-1.08422	9.50979	-11.2215	5.94699e-09	2.99471e-07	10.7321	ENSRNOG00000048847	Wdr17	WD repeat domain 17 [Source:RGD Symbol;Acc:1590843]
2.06082	3.3795	11.1529	6.48714e-09	3.25145e-07	10.7489	ENSRNOG00000011796	C1r	complement C1r [Source:RGD Symbol;Acc:1309091]
0.828217	6.14258	11.0971	6.96459e-09	3.47452e-07	10.6285	ENSRNOG00000004132	Lasp1	LIM and SH3 protein 1 [Source:RGD Symbol;Acc:68408]
-0.758901	7.95632	-11.0829	7.09168e-09	3.52154e-07	10.5301	ENSRNOG00000004201	Rims2	regulating synaptic membrane exocytosis 2 [Source:RGD Symbol;Acc:620001]
0.530285	9.98089	11.0576	7.32464e-09	3.60386e-07	10.5214	ENSRNOG00000046829	Kdr	kinase insert domain receptor [Source:RGD Symbol;Acc:2965]
-0.876635	6.67142	-11.0611	7.29147e-09	3.60386e-07	10.5051	ENSRNOG00000021013	Stx3	syntaxin 3 [Source:RGD Symbol;Acc:621005]
-0.679977	5.07596	-11.0514	7.38289e-09	3.61593e-07	10.5979	ENSRNOG00000047873	Sec22c	SEC22 homolog C, vesicle trafficking protein [Source:RGD Symbol;Acc:1590146]
-0.467741	9.11737	-11.0442	7.45118e-09	3.63279e-07	10.4905	ENSRNOG00000006336	Fyco1	FYVE and coiled-coil domain autophagy adaptor 1 [Source:RGD Symbol;Acc:1309069]
-1.5732	1.83577	-11.0263	7.62356e-09	3.70001e-07	10.4671	ENSRNOG00000029055	Ttk	Ttk protein kinase [Source:RGD Symbol;Acc:1305558]
-0.580514	5.88487	-11.0001	7.88486e-09	3.8096e-07	10.4721	ENSRNOG00000020317	Rab5if	RAB5 interacting factor [Source:RGD Symbol;Acc:1307752]
-0.52985	5.09615	-10.9781	8.11088e-09	3.90123e-07	10.5015	ENSRNOG00000024889	Snip1	Smad nuclear interacting protein 1 [Source:RGD Symbol;Acc:1359268]
-0.761118	4.81354	-10.9369	8.55224e-09	4.09146e-07	10.4586	ENSRNOG00000036980	Zgrf1	zinc finger, GRF-type containing 1 [Source:RGD Symbol;Acc:1305834]
-2.72561	0.771871	-10.9342	8.58269e-09	4.09146e-07	8.39844	ENSRNOG00000048264	H4f3	H1.3 linker histone, cluster member [Source:RGD Symbol;Acc:1585568]
-0.730493	7.55363	-10.9252	8.68211e-09	4.10304e-07	10.323	ENSRNOG00000023561	Ano2	anoctamin 2 [Source:RGD Symbol;Acc:1591606]
-0.827863	6.00566	-10.9217	8.72173e-09	4.10304e-07	10.3495	ENSRNOG00000007221	Dut	deoxyuridine triphosphatase [Source:RGD Symbol;Acc:620849]
-1.02065	3.96803	-10.9248	8.68739e-09	4.10304e-07	10.5281	ENSRNOG00000021493	Prdm9	PR/SET domain 9 [Source:RGD Symbol;Acc:1305247]
-0.629112	7.81563	-10.8937	9.04314e-09	4.23567e-07	10.278	ENSRNOG00000013061	Tusc3	tumor suppressor candidate 3 [Source:RGD Symbol;Acc:1303318]
0.839046	3.83849	10.8776	9.23298e-09	4.30578e-07	10.497	ENSRNOG00000014034	Olfml2a	olfactomedin-like 2A [Source:RGD Symbol;Acc:1311651]
0.53029	7.25229	10.8252	9.88259e-09	4.58877e-07	10.196	ENSRNOG00000004438	Cntn1	contactin 1 [Source:RGD Symbol;Acc:621300]
-0.559396	8.06417	-10.8117	1.00581e-08	4.65012e-07	10.1701	ENSRNOG00000019534	Ap2a2	adaptor related protein complex 2 subunit alpha 2 [Source:RGD Symbol;Acc:71015]
0.922098	5.14572	10.8042	1.01566e-08	4.67551e-07	10.2995	ENSRNOG00000008193	Cd46	CD46 molecule [Source:RGD Symbol;Acc:3061]
0.841069	6.64251	10.798	1.0239e-08	4.69331e-07	10.1741	ENSRNOG00000005159	Fam135b	family with sequence similarity 135, member B [Source:RGD Symbol;Acc:1308133]
-0.586077	5.93894	-10.7164	1.13913e-08	5.19926e-07	10.0801	ENSRNOG00000009143	Lrrc57	leucine rich repeat containing 57 [Source:RGD Symbol;Acc:1307128]
4.24358	5.48259	10.709	1.15018e-08	5.22745e-07	10.2855	ENSRNOG00000002919	Gfap	glial fibrillary acidic protein [Source:RGD Symbol;Acc:2679]
2.34625	2.58152	10.7029	1.15951e-08	5.24763e-07	9.93951	ENSRNOG00000005883	Nek10	NIMA-related kinase 10 [Source:RGD Symbol;Acc:1564342]
-0.98942	6.18513	-10.6544	1.23576e-08	5.56922e-07	9.98196	ENSRNOG00000005577	Desi1	desumoylating isopeptidase 1 [Source:RGD Symbol;Acc:1305776]
-0.683391	6.49793	-10.6471	1.24768e-08	5.59941e-07	9.96058	ENSRNOG00000021440	Pptc7	protein phosphatase targeting COQ7 [Source:RGD Symbol;Acc:1310383]
-0.830202	6.99759	-10.6256	1.28352e-08	5.73628e-07	9.91754	ENSRNOG00000029316	Gtf2f2	general transcription factor IIF subunit 2 [Source:RGD Symbol;Acc:620772]
2.25765	4.5632	10.6096	1.31086e-08	5.83413e-07	10.1571	ENSRNOG00000008465	Tmem176b	transmembrane protein 176B [Source:RGD Symbol;Acc:708403]
-0.536244	10.5182	-10.6057	1.31771e-08	5.84039e-07	9.93103	ENSRNOG00000043387	Cpe	carboxypeptidase E [Source:RGD Symbol;Acc:2394]
-0.456986	7.08687	-10.6007	1.32634e-08	5.85446e-07	9.88688	ENSRNOG00000013281	Mib1	MIB E3 ubiquitin protein ligase 1 [Source:RGD Symbol;Acc:1307195]
0.937398	5.55173	10.575	1.37222e-08	6.00751e-07	9.96701	ENSRNOG00000007650	Cd63	Cd63 molecule [Source:RGD Symbol;Acc:62080]
-2.20239	2.7805	-10.5768	1.36891e-08	6.00751e-07	10.091	ENSRNOG00000007078	Ccn4	cellular communication network factor 4 [Source:RGD Symbol;Acc:69431]
-0.687448	5.55001	-10.5643	1.3919e-08	6.0689e-07	9.89758	ENSRNOG00000037225	Tyms	thymidylate synthetase [Source:RGD Symbol;Acc:3921]
0.437543	7.22043	10.5527	1.4134e-08	6.13772e-07	9.82758	ENSRNOG00000004680	Kif5c	kinesin family member 5C [Source:RGD Symbol;Acc:1308539]
1.00673	6.81701	10.4953	1.52537e-08	6.57075e-07	9.75806	ENSRNOG00000012580	Ccdc141	coiled-coil domain containing 141 [Source:RGD Symbol;Acc:1593250]
-0.598321	5.19837	-10.4978	1.52024e-08	6.57075e-07	9.85083	ENSRNOG00000047053	Thyn1	thymocyte nuclear protein 1 [Source:RGD Symbol;Acc:1359525]
-0.591071	9.29693	-10.4704	1.57693e-08	6.71195e-07	9.71979	ENSRNOG00000003098	Prom1	prominin 1 [Source:RGD Symbol;Acc:69367]
-0.819456	4.50412	-10.4732	1.571e-08	6.71195e-07	9.8763	ENSRNOG00000016023	Kank1	KN motif and ankyrin repeat domains 1 [Source:RGD Symbol;Acc:1307714]
-1.13325	6.85498	-10.4743	1.56872e-08	6.71195e-07	9.71214	ENSRNOG00000026662	Plekhf2	pleckstrin homology and FYVE domain containing 2 [Source:RGD Symbol;Acc:1312029]
-0.799985	4.30678	-10.4654	1.58733e-08	6.72954e-07	9.90401	ENSRNOG00000024012	Pex10	peroxisomal biogenesis factor 10 [Source:RGD Symbol;Acc:1591776]
-2.59771	2.10266	-10.4618	1.59502e-08	6.7355e-07	9.30571	ENSRNOG00000002659	Ciita	class II, major histocompatibility complex, transactivator [Source:RGD Symbol;Acc:619813]
-1.46754	6.03206	-10.3661	1.81325e-08	7.62704e-07	9.6543	ENSRNOG00000018528	Nrl	neural retina leucine zipper [Source:RGD Symbol;Acc:1305197]
-1.06064	8.13832	-10.3432	1.86997e-08	7.8349e-07	9.53	ENSRNOG00000007821	Dyrk2	dual specificity tyrosine phosphorylation regulated kinase 2 [Source:RGD Symbol;Acc:1312039]
-1.02276	3.43567	-10.3333	1.89491e-08	7.89542e-07	9.77352	ENSRNOG00000000955	Lnx2	ligand of numb-protein X 2 [Source:RGD Symbol;Acc:1308222]
-1.19462	4.285	-10.3317	1.89914e-08	7.89542e-07	9.69032	ENSRNOG00000005037	Kif18a	kinesin family member 18A [Source:RGD Symbol;Acc:1561740]
-0.676704	5.73226	-10.2917	2.00437e-08	8.3007e-07	9.5362	ENSRNOG00000016949	Slc25a33	solute carrier family 25 member 33 [Source:RGD Symbol;Acc:1583942]
-0.720411	7.48869	-10.2529	2.11255e-08	8.71509e-07	9.40057	ENSRNOG00000015329	Kpna2	karyopherin subunit alpha 2 [Source:RGD Symbol;Acc:621419]
-0.805361	5.0202	-10.25	2.12078e-08	8.71553e-07	9.51739	ENSRNOG00000020701	Brca1	BRCA1, DNA repair associated [Source:RGD Symbol;Acc:2218]
-0.681261	4.82194	-10.2375	2.15709e-08	8.83089e-07	9.52363	ENSRNOG00000011528	Alg14	ALG14, UDP-N-acetylglucosaminyltransferase subunit [Source:RGD Symbol;Acc:1312003]
-0.502603	5.73314	-10.188	2.30713e-08	9.40925e-07	9.36869	ENSRNOG00000006619	Dnajc9	DnaJ heat shock protein family (Hsp40) member C9 [Source:RGD Symbol;Acc:1305009]
-0.585531	5.03596	-10.174	2.35145e-08	9.55364e-07	9.40747	ENSRNOG00000009664	Ankrd42	ankyrin repeat domain 42 [Source:RGD Symbol;Acc:1310789]
0.950056	4.75167	10.17	2.36429e-08	9.56958e-07	9.49158	ENSRNOG00000015401	Mapk4	mitogen-activated protein kinase 4 [Source:RGD Symbol;Acc:3047]
0.491917	4.88464	10.1625	2.38883e-08	9.63255e-07	9.44569	ENSRNOG00000018198	Dapk1	death associated protein kinase 1 [Source:RGD Symbol;Acc:1311629]
-0.574701	7.44059	-10.1493	2.43196e-08	9.76976e-07	9.25376	ENSRNOG00000002021	Son	SON DNA and RNA binding protein [Source:RGD Symbol;Acc:1309013]
-1.17334	2.97531	-10.1438	2.45039e-08	9.80706e-07	9.53565	ENSRNOG00000033335	Cenpi	centromere protein I [Source:RGD Symbol;Acc:2631]
-0.60552	7.74396	-10.1385	2.46839e-08	9.84237e-07	9.23955	ENSRNOG00000017035	Cep120	centrosomal protein 120 [Source:RGD Symbol;Acc:1565619]
-0.423682	6.35047	-10.1294	2.49915e-08	9.92809e-07	9.25221	ENSRNOG00000000785	Trim39	tripartite motif-containing 39 [Source:RGD Symbol;Acc:1303115]
-0.614287	4.85677	-10.1201	2.5311e-08	1.00179e-06	9.36713	ENSRNOG00000028652	Map10	microtubule-associated protein 10 [Source:RGD Symbol;Acc:1308644]
-0.561992	5.9328	-10.1157	2.5463e-08	1.0041e-06	9.26853	ENSRNOG00000011921	Dusp4	dual specificity phosphatase 4 [Source:RGD Symbol;Acc:620625]
-0.505668	4.9407	-10.113	2.55584e-08	1.00417e-06	9.34043	ENSRNOG00000010178	Cgrrf1	cell growth regulator with ring finger domain 1 [Source:RGD Symbol;Acc:620803]
1.03702	3.83516	10.0677	2.71955e-08	1.02058e-06	9.43317	ENSRNOG00000008683	Alk	ALK receptor tyrosine kinase [Source:RGD Symbol;Acc:628622]
0.998368	3.85006	10.0673	2.72129e-08	1.02058e-06	9.42157	ENSRNOG00000026186	Syde2	synapse defective Rho GTPase homolog 2 [Source:RGD Symbol;Acc:1564206]
0.685339	5.91978	10.0738	2.69692e-08	1.02058e-06	9.2344	ENSRNOG00000025151	Ildr2	immunoglobulin-like domain containing receptor 2 [Source:RGD Symbol;Acc:1596420]
0.530314	8.24659	10.0872	2.64798e-08	1.02058e-06	9.1697	ENSRNOG00000028362	Unc80	unc-80 homolog, NALCN channel complex subunit [Source:RGD Symbol;Acc:1309976]
0.486967	6.19995	10.0957	2.61734e-08	1.02058e-06	9.23481	ENSRNOG00000004585	Tmtc2	transmembrane O-mannosyltransferase targeting cadherins 2 [Source:RGD Symbol;Acc:1309848]
-0.576905	7.87639	-10.0887	2.64239e-08	1.02058e-06	9.16978	ENSRNOG00000002643	Ugdh	UDP-glucose 6-dehydrogenase [Source:RGD Symbol;Acc:621879]
-0.582827	6.8645	-10.0819	2.66723e-08	1.02058e-06	9.16449	ENSRNOG00000018477	Otud4	OTU deubiquitinase 4 [Source:RGD Symbol;Acc:1305606]
-0.62278	6.07883	-10.0749	2.69314e-08	1.02058e-06	9.18381	ENSRNOG00000054497	Taf4	TATA-box binding protein associated factor 4 [Source:RGD Symbol;Acc:1588072]
-0.688862	5.01594	-10.091	2.63395e-08	1.02058e-06	9.29339	ENSRNOG00000049019	Tmem170a	transmembrane protein 170A [Source:RGD Symbol;Acc:1559505]
-1.28656	8.91526	-10.0711	2.70719e-08	1.02058e-06	9.1576	ENSRNOG00000006967	Xiap	X-linked inhibitor of apoptosis [Source:RGD Symbol;Acc:620692]
-1.34434	3.24441	-10.0759	2.6891e-08	1.02058e-06	9.43242	ENSRNOG00000052954	Cfap210	cilia and flagella associated protein 210 [Source:RGD Symbol;Acc:1308818]
-1.4066	7.82453	-10.0701	2.7108e-08	1.02058e-06	9.14863	ENSRNOG00000008209	St3gal1	ST3 beta-galactoside alpha-2,3-sialyltransferase 1 [Source:RGD Symbol;Acc:1309373]
-1.41092	7.3448	-10.0781	2.68106e-08	1.02058e-06	9.15852	ENSRNOG00000042658	Nxnl1	nucleoredoxin-like 1 [Source:RGD Symbol;Acc:1308296]
-0.635463	4.27572	-10.0509	2.78321e-08	1.04017e-06	9.33454	ENSRNOG00000000937	Slc46a3	solute carrier family 46, member 3 [Source:RGD Symbol;Acc:1307594]
-1.3719	4.32856	-10.046	2.80196e-08	1.04353e-06	9.31348	ENSRNOG00000018716	Dennd2c	DENN domain containing 2C [Source:RGD Symbol;Acc:1308197]
-0.64326	6.26729	-10.0203	2.90314e-08	1.07748e-06	9.09712	ENSRNOG00000018082	Slc26a2	solute carrier family 26 member 2 [Source:RGD Symbol;Acc:620622]
-0.499468	6.79511	-10.011	2.94068e-08	1.08765e-06	9.06774	ENSRNOG00000004193	Klhl12	kelch-like family member 12 [Source:RGD Symbol;Acc:628717]
0.726246	4.56556	9.97214	3.10272e-08	1.14268e-06	9.22149	ENSRNOG00000002671	Nme2	NME/NM23 nucleoside diphosphate kinase 2 [Source:RGD Symbol;Acc:619877]
0.458145	6.80016	9.97026	3.11078e-08	1.14268e-06	9.01751	ENSRNOG00000010889	Fbxw7	F-box and WD repeat domain containing 7 [Source:RGD Symbol;Acc:2321145]
0.901532	4.19514	9.9382	3.25208e-08	1.19051e-06	9.20188	ENSRNOG00000047817	Enox1	ecto-NOX disulfide-thiol exchanger 1 [Source:RGD Symbol;Acc:1306118]
0.700542	6.69776	9.91248	3.37032e-08	1.22959e-06	8.94179	ENSRNOG00000007546	Asns	asparagine synthetase (glutamine-hydrolyzing) [Source:RGD Symbol;Acc:2162]
0.59536	4.29898	9.90467	3.40712e-08	1.2349e-06	9.14124	ENSRNOG00000028198	Sh2b3	SH2B adaptor protein 3 [Source:RGD Symbol;Acc:68411]
-0.694965	6.51028	-9.90322	3.414e-08	1.2349e-06	8.91959	ENSRNOG00000004863	Mpped2	metallophosphoesterase domain containing 2 [Source:RGD Symbol;Acc:735060]
-0.775163	11.8011	-9.90208	3.41939e-08	1.2349e-06	8.98443	ENSRNOG00000010546	Gngt1	G protein subunit gamma transducin 1 [Source:RGD Symbol;Acc:1595475]
-0.816982	4.96823	-9.89208	3.46729e-08	1.24799e-06	9.04476	ENSRNOG00000000576	Anapc16	anaphase promoting complex subunit 16 [Source:RGD Symbol;Acc:2321124]
-0.879337	8.76741	-9.88433	3.50493e-08	1.25732e-06	8.88676	ENSRNOG00000002618	Ivns1abp	influenza virus NS1A binding protein [Source:RGD Symbol;Acc:1306290]
0.640746	8.43171	9.86832	3.58398e-08	1.28139e-06	8.85857	ENSRNOG00000011989	Vat1l	vesicle amine transport 1-like [Source:RGD Symbol;Acc:1598315]
1.01934	4.93471	9.86308	3.6103e-08	1.28652e-06	9.05091	ENSRNOG00000008283	B4galt5	beta-1,4-galactosyltransferase 5 [Source:RGD Symbol;Acc:1310062]
0.498869	6.10078	9.84105	3.72304e-08	1.3223e-06	8.87658	ENSRNOG00000018839	Ntrk2	neurotrophic receptor tyrosine kinase 2 [Source:RGD Symbol;Acc:3213]
-0.792433	5.17986	-9.83405	3.75964e-08	1.33089e-06	8.94578	ENSRNOG00000022726	Lrit2	leucine-rich repeat, Ig-like and transmembrane domains 2 [Source:RGD Symbol;Acc:1564668]
-1.7644	5.12804	-9.81755	3.84742e-08	1.35748e-06	8.88968	ENSRNOG00000013057	Prc1	protein regulator of cytokinesis 1 [Source:RGD Symbol;Acc:1311754]
-1.31731	10.7198	-9.79822	3.95302e-08	1.39017e-06	8.80881	ENSRNOG00000017404	Pcmtd2	protein-L-isoaspartate (D-aspartate) O-methyltransferase domain containing 2 [Source:RGD Symbol;Acc:1305684]
0.466208	4.78736	9.79457	3.97329e-08	1.39273e-06	8.93949	ENSRNOG00000011882	Gab2	GRB2-associated binding protein 2 [Source:RGD Symbol;Acc:621367]
0.852248	4.78187	9.78804	4.00984e-08	1.40096e-06	8.92521	ENSRNOG00000003338	Pmp22	peripheral myelin protein 22 [Source:RGD Symbol;Acc:3359]
-0.895145	6.83702	-9.77907	4.06065e-08	1.41411e-06	8.72838	ENSRNOG00000033134	Mef2c	myocyte enhancer factor 2C [Source:RGD Symbol;Acc:1563119]
-1.10996	2.45423	-9.77059	4.1093e-08	1.42642e-06	9.01666	ENSRNOG00000018631	Enkur	enkurin, TRPC channel interacting protein [Source:RGD Symbol;Acc:1309839]
-0.591359	7.22837	-9.75477	4.20167e-08	1.45052e-06	8.68915	ENSRNOG00000017231	Adam9	ADAM metallopeptidase domain 9 [Source:RGD Symbol;Acc:621473]
-1.22986	6.21938	-9.75407	4.20579e-08	1.45052e-06	8.70728	ENSRNOG00000054900	Dnaaf6	dynein axonemal assembly factor 6 [Source:RGD Symbol;Acc:1566312]
-0.719239	4.80127	-9.74641	4.25139e-08	1.46155e-06	8.82191	ENSRNOG00000002253	Wdr5b	WD repeat domain 5B [Source:RGD Symbol;Acc:1308567]
-0.957281	4.6011	-9.73838	4.29972e-08	1.47344e-06	8.8797	ENSRNOG00000015718	RGD1307461	similar to RIKEN cDNA 6430571L13 gene; similar to g20 protein [Source:RGD Symbol;Acc:1307461]
-2.85606	1.36493	-9.73205	4.3382e-08	1.4819e-06	8.34547	ENSRNOG00000004179	Nts	neurotensin [Source:RGD Symbol;Acc:621612]
-0.557481	5.09128	-9.7256	4.37783e-08	1.49068e-06	8.76568	ENSRNOG00000007578	Zfp830	zinc finger protein 830 [Source:RGD Symbol;Acc:1562573]
-1.31239	7.20319	-9.69617	4.56341e-08	1.54896e-06	8.61987	ENSRNOG00000030434	Rs1	retinoschisin 1 [Source:RGD Symbol;Acc:1642515]
0.399414	6.12975	9.6827	4.65112e-08	1.57375e-06	8.63827	ENSRNOG00000002214	Klhl8	kelch-like family member 8 [Source:RGD Symbol;Acc:1304685]
-0.539966	5.65022	-9.6773	4.68678e-08	1.58083e-06	8.65659	ENSRNOG00000001781	Lmln	leishmanolysin like peptidase [Source:RGD Symbol;Acc:1311465]
1.36892	4.71647	9.67263	4.71784e-08	1.58136e-06	8.77366	ENSRNOG00000016496	Ctsc	cathepsin C [Source:RGD Symbol;Acc:2445]
0.536787	7.33925	9.67468	4.70417e-08	1.58136e-06	8.57902	ENSRNOG00000000233	Grm6	glutamate metabotropic receptor 6 [Source:RGD Symbol;Acc:2747]
1.05917	3.68286	9.65839	4.81389e-08	1.60853e-06	8.86437	ENSRNOG00000000142	Plxdc2	plexin domain containing 2 [Source:RGD Symbol;Acc:1305962]
-0.580022	6.86835	-9.65308	4.85026e-08	1.61565e-06	8.54721	ENSRNOG00000009580	Lca5	lebercilin LCA5 [Source:RGD Symbol;Acc:1308555]
0.457717	6.18307	9.64246	4.92384e-08	1.63508e-06	8.57569	ENSRNOG00000006645	Ryr3	ryanodine receptor 3 [Source:RGD Symbol;Acc:68952]
0.649645	7.8285	9.63363	4.98591e-08	1.65058e-06	8.51327	ENSRNOG00000007110	Ankrd6	ankyrin repeat domain 6 [Source:RGD Symbol;Acc:1583731]
-0.694153	4.91815	-9.63037	5.00902e-08	1.65313e-06	8.64602	ENSRNOG00000029321	Ccser1	coiled-coil serine-rich protein 1 [Source:RGD Symbol;Acc:1565731]
-1.12178	4.03648	-9.61135	5.14623e-08	1.6932e-06	8.70621	ENSRNOG00000000716	Htr1f	5-hydroxytryptamine receptor 1F [Source:RGD Symbol;Acc:71083]
-0.672338	8.09026	-9.60272	5.20976e-08	1.70887e-06	8.4689	ENSRNOG00000012037	Galnt7	polypeptide N-acetylgalactosaminyltransferase 7 [Source:RGD Symbol;Acc:620362]
0.650409	6.90582	9.59882	5.23876e-08	1.71314e-06	8.47789	ENSRNOG00000009539	Khdrbs3	KH RNA binding domain containing, signal transduction associated 3 [Source:RGD Symbol;Acc:620921]
-0.499458	5.54113	-9.59206	5.28937e-08	1.72443e-06	8.53764	ENSRNOG00000003281	Mcm9	minichromosome maintenance 9 homologous recombination repair factor [Source:RGD Symbol;Acc:1560557]
0.749839	5.32542	9.58919	5.31107e-08	1.72626e-06	8.58961	ENSRNOG00000016361	Plcd4	phospholipase C, delta 4 [Source:RGD Symbol;Acc:621025]
0.492663	5.42908	9.5805	5.37722e-08	1.74248e-06	8.55284	ENSRNOG00000009542	Kcnh5	potassium voltage-gated channel subfamily H member 5 [Source:RGD Symbol;Acc:621417]
-0.787513	10.5038	-9.57625	5.40987e-08	1.74778e-06	8.47406	ENSRNOG00000013330	Cdhr1	cadherin-related family member 1 [Source:RGD Symbol;Acc:620420]
0.443962	7.08517	9.56293	5.51359e-08	1.77594e-06	8.41949	ENSRNOG00000060687	Slc24a3	solute carrier family 24 member 3 [Source:RGD Symbol;Acc:69256]
-0.485567	8.31293	-9.52489	5.82155e-08	1.86604e-06	8.35554	ENSRNOG00000048205	Ube2h	ubiquitin-conjugating enzyme E2H [Source:RGD Symbol;Acc:2319288]
-0.577109	5.20117	-9.5241	5.82811e-08	1.86604e-06	8.46252	ENSRNOG00000011492	LOC108348302	zinc finger protein 709-like [Source:RGD Symbol;Acc:11429468]
0.619269	7.1449	9.51689	5.88856e-08	1.8742e-06	8.34979	ENSRNOG00000018417	Naa35	N(alpha)-acetyltransferase 35, NatC auxiliary subunit [Source:RGD Symbol;Acc:621771]
0.343567	7.35712	9.51846	5.87539e-08	1.8742e-06	8.34743	ENSRNOG00000007462	Septin8	septin 8 [Source:RGD Symbol;Acc:1308449]
-1.31771	7.69316	-9.50358	6.00197e-08	1.90465e-06	8.32079	ENSRNOG00000009322	Ccdc126	coiled-coil domain containing 126 [Source:RGD Symbol;Acc:1561171]
0.995947	4.65	9.49122	6.10928e-08	1.93104e-06	8.5408	ENSRNOG00000053631	Tdrd9	tudor domain containing 9 [Source:RGD Symbol;Acc:1306942]
0.488487	5.21918	9.48787	6.13872e-08	1.93104e-06	8.45517	ENSRNOG00000014264	Phactr1	phosphatase and actin regulator 1 [Source:RGD Symbol;Acc:1303187]
-0.474057	6.9179	-9.48654	6.15038e-08	1.93104e-06	8.30292	ENSRNOG00000062295	Gm9918	predicted gene 9918 [Source:RGD Symbol;Acc:15014772]
-0.825169	5.55432	-9.48578	6.15715e-08	1.93104e-06	8.3912	ENSRNOG00000012597	Rmc1	regulator of MON1-CCZ1 [Source:RGD Symbol;Acc:1311805]
1.05306	3.05215	9.48309	6.18096e-08	1.93159e-06	8.63257	ENSRNOG00000004226	Irak3	interleukin-1 receptor-associated kinase 3 [Source:RGD Symbol;Acc:1308846]
-0.41028	7.47389	-9.48152	6.19493e-08	1.93159e-06	8.28736	ENSRNOG00000002708	Phf8	PHD finger protein 8 [Source:RGD Symbol;Acc:1561065]
1.87815	2.46124	9.4574	6.41336e-08	1.9939e-06	8.41126	ENSRNOG00000012262	Depdc7	DEP domain containing 7 [Source:RGD Symbol;Acc:1309720]
-0.532548	7.59835	-9.45058	6.47659e-08	2.00774e-06	8.2407	ENSRNOG00000031328	Zfp110	zinc finger protein 110 [Source:RGD Symbol;Acc:1306339]
-0.631301	6.91757	-9.4467	6.51283e-08	2.01316e-06	8.24153	ENSRNOG00000006649	Thrb	thyroid hormone receptor beta [Source:RGD Symbol;Acc:3858]
0.615733	5.04506	9.43271	6.64539e-08	2.04236e-06	8.37869	ENSRNOG00000005573	Ntn4	netrin 4 [Source:RGD Symbol;Acc:1565947]
-0.514157	5.63955	-9.43455	6.62779e-08	2.04236e-06	8.29558	ENSRNOG00000006541	Nup107	nucleoporin 107 [Source:RGD Symbol;Acc:621160]
-0.752245	4.5796	-9.42714	6.69894e-08	2.05294e-06	8.38514	ENSRNOG00000009965	Pih1d2	PIH1 domain containing 2 [Source:RGD Symbol;Acc:1310503]
-0.478325	5.74228	-9.41771	6.79063e-08	2.07511e-06	8.25997	ENSRNOG00000015212	Hspa14	heat shock protein family A (Hsp70) member 14 [Source:RGD Symbol;Acc:1303296]
-0.479167	6.29186	-9.40456	6.92073e-08	2.10886e-06	8.20395	ENSRNOG00000003599	Utp3	UTP3, small subunit processome component [Source:RGD Symbol;Acc:1308540]
-1.01166	7.88525	-9.39828	6.98384e-08	2.12206e-06	8.16775	ENSRNOG00000019645	Osbp2	oxysterol binding protein 2 [Source:RGD Symbol;Acc:1310505]
0.632721	4.85997	9.37676	7.20455e-08	2.17067e-06	8.32112	ENSRNOG00000060614	Pxdn	peroxidasin [Source:RGD Symbol;Acc:1560694]
-0.384847	6.65839	-9.3774	7.19789e-08	2.17067e-06	8.14932	ENSRNOG00000021815	Lig3	DNA ligase 3 [Source:RGD Symbol;Acc:1309875]
-0.439364	5.56507	-9.37869	7.18446e-08	2.17067e-06	8.22905	ENSRNOG00000025629	Prpf3	pre-mRNA processing factor 3 [Source:RGD Symbol;Acc:1310555]
0.692008	7.47325	9.35176	7.47022e-08	2.24441e-06	8.09656	ENSRNOG00000002524	Gpr37	G protein-coupled receptor 37 [Source:RGD Symbol;Acc:619848]
-0.709776	5.23485	-9.33866	7.61346e-08	2.27493e-06	8.17781	ENSRNOG00000002153	Cep135	centrosomal protein 135 [Source:RGD Symbol;Acc:1310726]
-0.938189	7.73471	-9.3386	7.61421e-08	2.27493e-06	8.0742	ENSRNOG00000013620	Cdk13	cyclin-dependent kinase 13 [Source:RGD Symbol;Acc:1311226]
1.18853	5.75635	9.33247	7.68227e-08	2.28866e-06	8.15131	ENSRNOG00000010478	Serpina3n	serine (or cysteine) peptidase inhibitor, clade A, member 3N [Source:RGD Symbol;Acc:3747]
0.921069	3.61332	9.33062	7.70285e-08	2.28866e-06	8.39037	ENSRNOG00000042189	Rab31	RAB31, member RAS oncogene family [Source:RGD Symbol;Acc:628598]
-0.553111	4.65874	-9.30786	7.96199e-08	2.35912e-06	8.20575	ENSRNOG00000012679	Oard1	O-acyl-ADP-ribose deacylase 1 [Source:RGD Symbol;Acc:1308299]
-0.500947	6.334	-9.30402	8.00657e-08	2.3593e-06	8.05434	ENSRNOG00000030639	Usp13	ubiquitin specific peptidase 13 [Source:RGD Symbol;Acc:1306044]
-0.671857	4.70693	-9.30418	8.00466e-08	2.3593e-06	8.18943	ENSRNOG00000005374	Lyar	Ly1 antibody reactive [Source:RGD Symbol;Acc:1305352]
0.636673	4.52098	9.27448	8.35859e-08	2.45628e-06	8.20724	ENSRNOG00000038459	Ulk3	unc-51 like kinase 3 [Source:RGD Symbol;Acc:1587417]
0.441145	6.87788	9.27247	8.38312e-08	2.45676e-06	7.98879	ENSRNOG00000002182	Septin11	septin 11 [Source:RGD Symbol;Acc:1307405]
-1.66582	2.35589	-9.26739	8.44557e-08	2.46832e-06	8.3221	ENSRNOG00000001270	Hvcn1	hydrogen voltage-gated channel 1 [Source:RGD Symbol;Acc:1310788]
2.10388	3.18853	9.26488	8.47653e-08	2.47063e-06	8.31217	ENSRNOG00000020716	Axl	Axl receptor tyrosine kinase [Source:RGD Symbol;Acc:620028]
2.20572	1.78949	9.25418	8.60992e-08	2.49653e-06	7.58065	ENSRNOG00000009385	Pik3cg	phosphatidylinositol-4,5-bisphosphate 3-kinase, catalytic subunit gamma [Source:RGD Symbol;Acc:1306468]
0.514893	4.78883	9.25402	8.61193e-08	2.49653e-06	8.14352	ENSRNOG00000049349	Tafa5	TAFA chemokine like family member 5 [Source:RGD Symbol;Acc:1562115]
-1.1917	8.56731	-9.25181	8.63986e-08	2.49787e-06	7.95138	ENSRNOG00000003434	Ro60	Ro60, Y RNA binding protein [Source:RGD Symbol;Acc:1305083]
0.508632	6.258	9.24958	8.66802e-08	2.49928e-06	7.9871	ENSRNOG00000003931	Arsg	arylsulfatase G [Source:RGD Symbol;Acc:1306571]
0.572733	4.6451	9.22076	9.0413e-08	2.59992e-06	8.119	ENSRNOG00000024757	Endod1	endonuclease domain containing 1 [Source:RGD Symbol;Acc:1310444]
1.40326	6.94785	9.20493	9.25338e-08	2.65379e-06	7.89436	ENSRNOG00000014079	Stat4	signal transducer and activator of transcription 4 [Source:RGD Symbol;Acc:1305747]
-1.02607	2.42412	-9.19572	9.37919e-08	2.6827e-06	8.22132	ENSRNOG00000012729	Mfsd8	major facilitator superfamily domain containing 8 [Source:RGD Symbol;Acc:1310132]
2.47085	3.54022	9.19241	9.42488e-08	2.6886e-06	8.21081	ENSRNOG00000017328	Pter	phosphotriesterase related [Source:RGD Symbol;Acc:61313]
0.951833	4.45212	9.18205	9.56934e-08	2.71175e-06	8.0819	ENSRNOG00000002061	Ptpn13	protein tyrosine phosphatase, non-receptor type 13 [Source:RGD Symbol;Acc:1563360]
-0.759598	6.03807	-9.18116	9.58187e-08	2.71175e-06	7.86895	ENSRNOG00000058724	Thap6	THAP domain containing 6 [Source:RGD Symbol;Acc:1310094]
-0.859018	4.20569	-9.18359	9.5478e-08	2.71175e-06	8.08021	ENSRNOG00000014659	Ebpl	EBP like [Source:RGD Symbol;Acc:1304571]
4.14883	2.93315	9.16734	9.77847e-08	2.74565e-06	7.43604	ENSRNOG00000006367	Slc5a8	solute carrier family 5 member 8 [Source:RGD Symbol;Acc:1564146]
0.741769	4.13894	9.16832	9.76435e-08	2.74565e-06	8.10817	ENSRNOG00000007636	Cadps2	calcium dependent secretion activator 2 [Source:RGD Symbol;Acc:1559440]
-0.508235	6.3566	-9.16966	9.74515e-08	2.74565e-06	7.84033	ENSRNOG00000010096	Azi2	5-azacytidine induced 2 [Source:RGD Symbol;Acc:1310530]
-0.451753	5.08406	-9.14542	1.00991e-07	2.82827e-06	7.90548	ENSRNOG00000010556	Intu	inturned planar cell polarity protein [Source:RGD Symbol;Acc:1309446]
-0.36743	7.16506	-9.11879	1.05034e-07	2.93384e-06	7.74479	ENSRNOG00000024632	Atf6	activating transcription factor 6 [Source:RGD Symbol;Acc:1305471]
0.853723	4.17533	9.10736	1.06821e-07	2.96831e-06	8.04115	ENSRNOG00000012556	Isl1	ISL LIM homeobox 1 [Source:RGD Symbol;Acc:61957]
-0.5708	4.25678	-9.10853	1.06638e-07	2.96831e-06	7.96332	ENSRNOG00000008978	Trmt12	tRNA methyltransferase 12 [Source:RGD Symbol;Acc:1307127]
-0.585128	5.23811	-9.09165	1.09332e-07	3.03021e-06	7.81646	ENSRNOG00000036697	Mafg	MAF bZIP transcription factor G [Source:RGD Symbol;Acc:619953]
-0.539853	5.26551	-9.08732	1.10034e-07	3.04183e-06	7.80471	ENSRNOG00000014089	Map3k2	mitogen activated protein kinase kinase kinase 2 [Source:RGD Symbol;Acc:620967]
-0.518049	7.23966	-9.0781	1.11545e-07	3.07567e-06	7.68078	ENSRNOG00000053518	Zscan26	zinc finger and SCAN domain containing 26 [Source:RGD Symbol;Acc:727885]
1.1797	3.16667	9.07128	1.12678e-07	3.09893e-06	8.0476	ENSRNOG00000026036	Pdyn	prodynorphin [Source:RGD Symbol;Acc:62054]
-0.433633	6.52873	-9.06463	1.13793e-07	3.1216e-06	7.67272	ENSRNOG00000012264	Alkbh1	alkB homolog 1, histone H2A dioxygenase [Source:RGD Symbol;Acc:1308327]
-0.550354	5.58295	-9.05744	1.15013e-07	3.14038e-06	7.74089	ENSRNOG00000012928	Prmt9	protein arginine methyltransferase 9 [Source:RGD Symbol;Acc:1306157]
-0.550867	9.87629	-9.05714	1.15063e-07	3.14038e-06	7.67704	ENSRNOG00000002051	Synj1	synaptojanin 1 [Source:RGD Symbol;Acc:69434]
-0.419296	6.07206	-9.04628	1.16932e-07	3.18328e-06	7.68215	ENSRNOG00000012923	Rprd1b	regulation of nuclear pre-mRNA domain containing 1B [Source:RGD Symbol;Acc:1304782]
-0.849611	4.26887	-9.02874	1.20018e-07	3.25902e-06	7.82009	ENSRNOG00000043186	Ppil6	peptidylprolyl isomerase like 6 [Source:RGD Symbol;Acc:1592581]
1.87083	1.88276	9.02635	1.20445e-07	3.26177e-06	7.46704	ENSRNOG00000003538	Adamts4	ADAM metallopeptidase with thrombospondin type 1 motif, 4 [Source:RGD Symbol;Acc:621242]
0.537293	4.99449	9.02478	1.20727e-07	3.26177e-06	7.7665	ENSRNOG00000002180	Tbc1d1	TBC1 domain family member 1 [Source:RGD Symbol;Acc:1304562]
-1.0472	5.53047	-9.01493	1.22509e-07	3.3016e-06	7.67752	ENSRNOG00000010050	Stard9	StAR-related lipid transfer domain containing 9 [Source:RGD Symbol;Acc:1593360]
0.669237	4.09437	9.01247	1.22958e-07	3.30538e-06	7.8786	ENSRNOG00000000123	Rnf19b	ring finger protein 19B [Source:RGD Symbol;Acc:1305470]
1.2432	3.80632	8.9991	1.2543e-07	3.36341e-06	7.88947	ENSRNOG00000008196	Parp12	poly (ADP-ribose) polymerase family, member 12 [Source:RGD Symbol;Acc:1308628]
0.951278	4.77426	8.99302	1.26571e-07	3.38553e-06	7.74597	ENSRNOG00000012460	Cntf	ciliary neurotrophic factor [Source:RGD Symbol;Acc:2370]
1.23246	6.57811	8.98302	1.28473e-07	3.42785e-06	7.56614	ENSRNOG00000030715	Cfh	complement factor H [Source:RGD Symbol;Acc:620428]
3.17579	3.62908	8.9729	1.30426e-07	3.47134e-06	7.81235	ENSRNOG00000015746	Kcng4	potassium voltage-gated channel modifier subfamily G member 4 [Source:RGD Symbol;Acc:1308553]
-1.85615	1.53435	-8.97114	1.3077e-07	3.47187e-06	7.8239	ENSRNOG00000037600	Sim1	SIM bHLH transcription factor 1 [Source:RGD Symbol;Acc:1309949]
2.0416	2.60083	8.96642	1.31694e-07	3.47919e-06	7.73931	ENSRNOG00000008816	Gpnmb	glycoprotein nmb [Source:RGD Symbol;Acc:71008]
-0.397972	5.80724	-8.96693	1.31594e-07	3.47919e-06	7.57299	ENSRNOG00000004807	Arf2	ADP-ribosylation factor 2 [Source:RGD Symbol;Acc:621271]
2.33168	3.15267	8.95981	1.33001e-07	3.50507e-06	7.83221	ENSRNOG00000023708	Tmem176a	transmembrane protein 176A [Source:RGD Symbol;Acc:1310725]
-0.598573	6.45346	-8.95328	1.34305e-07	3.53078e-06	7.51485	ENSRNOG00000013583	Tbc1d8	TBC1 domain family, member 8 [Source:RGD Symbol;Acc:1595491]
-0.932791	3.93377	-8.94343	1.36298e-07	3.5744e-06	7.73795	ENSRNOG00000017581	C2h5orf34	similar to human chromosome 5 open reading frame 34 [Source:RGD Symbol;Acc:1306227]
-0.808433	6.24893	-8.93681	1.37654e-07	3.60117e-06	7.48822	ENSRNOG00000052721	Kdm6a	lysine demethylase 6A [Source:RGD Symbol;Acc:9275041]
1.33304	4.74359	8.93298	1.38446e-07	3.61307e-06	7.66627	ENSRNOG00000029342	Scn7a	sodium voltage-gated channel alpha subunit 7 [Source:RGD Symbol;Acc:61922]
-0.496263	5.57217	-8.9137	1.42503e-07	3.70992e-06	7.5249	ENSRNOG00000016998	Atxn1	ataxin 1 [Source:RGD Symbol;Acc:3624]
-0.436018	6.48779	-8.90734	1.4387e-07	3.73197e-06	7.44052	ENSRNOG00000006514	Vezt	vezatin, adherens junctions transmembrane protein [Source:RGD Symbol;Acc:1359117]
-1.9387	11.5178	-8.90652	1.44046e-07	3.73197e-06	7.49285	ENSRNOG00000017589	Gnat1	G protein subunit alpha transducin 1 [Source:RGD Symbol;Acc:1304683]
-0.414593	6.50374	-8.88568	1.48625e-07	3.84134e-06	7.40183	ENSRNOG00000056041	Ipo8	importin 8 [Source:RGD Symbol;Acc:1593688]
2.08131	1.9178	8.8793	1.50058e-07	3.86903e-06	7.07502	ENSRNOG00000016750	Cyp26a1	cytochrome P450, family 26, subfamily a, polypeptide 1 [Source:RGD Symbol;Acc:620161]
2.47461	7.12222	8.86819	1.52586e-07	3.92479e-06	7.46759	ENSRNOG00000015541	Gnb3	G protein subunit beta 3 [Source:RGD Symbol;Acc:708344]
-0.608158	5.58931	-8.84747	1.57421e-07	4.03947e-06	7.42337	ENSRNOG00000001138	Taok3	TAO kinase 3 [Source:RGD Symbol;Acc:1562861]
-1.06062	3.2281	-8.8445	1.58128e-07	4.04793e-06	7.68615	ENSRNOG00000051510	Ccdc113	coiled-coil domain containing 113 [Source:RGD Symbol;Acc:1565763]
0.479166	6.36529	8.84218	1.58681e-07	4.05242e-06	7.36041	ENSRNOG00000030151	Thsd7a	thrombospondin type 1 domain containing 7A [Source:RGD Symbol;Acc:1566201]
-0.742796	8.74483	-8.84059	1.59063e-07	4.05253e-06	7.32129	ENSRNOG00000007889	Aipl1	aryl hydrocarbon receptor-interacting protein-like 1 [Source:RGD Symbol;Acc:70906]
0.505248	6.49639	8.8354	1.60311e-07	4.07464e-06	7.34046	ENSRNOG00000007152	Bhlhe40	basic helix-loop-helix family, member e40 [Source:RGD Symbol;Acc:68439]
0.866439	4.69017	8.83035	1.61538e-07	4.09612e-06	7.55472	ENSRNOG00000014453	Anxa5	annexin A5 [Source:RGD Symbol;Acc:2120]
-1.21871	2.24739	-8.79727	1.69818e-07	4.29593e-06	7.64627	ENSRNOG00000045889	LOC688282	RIKEN cDNA 6030468B19 gene [Source:MGI Symbol;Acc:MGI:1924977]
-0.999806	3.65876	-8.78918	1.71909e-07	4.33859e-06	7.52526	ENSRNOG00000052607	Snora12	small nucleolar RNA, H/ACA box 12 [Source:RGD Symbol;Acc:41366654]
-0.731546	7.39021	-8.76852	1.77376e-07	4.46605e-06	7.203	ENSRNOG00000050500	Tob2	transducer of ERBB2, 2 [Source:RGD Symbol;Acc:1359722]
-0.760944	4.16452	-8.75989	1.79712e-07	4.51427e-06	7.46827	ENSRNOG00000018052	Cnksr3	Cnksr family member 3 [Source:RGD Symbol;Acc:1307544]
-1.60248	7.23758	-8.73037	1.87956e-07	4.71032e-06	7.17765	ENSRNOG00000006116	Hk2	hexokinase 2 [Source:RGD Symbol;Acc:2797]
0.865548	3.30826	8.68952	2.00021e-07	4.98935e-06	7.48494	ENSRNOG00000012791	Ajuba	ajuba LIM protein [Source:RGD Symbol;Acc:620407]
0.618234	4.19764	8.68994	1.99893e-07	4.98935e-06	7.36022	ENSRNOG00000007707	Zfp467	zinc finger protein 467 [Source:RGD Symbol;Acc:1561603]
0.600317	5.78928	8.68261	2.02141e-07	5.03054e-06	7.18176	ENSRNOG00000017434	Mgat3	beta-1,4-mannosyl-glycoprotein 4-beta-N-acetylglucosaminyltransferase [Source:RGD Symbol;Acc:3084]
0.900385	4.9087	8.67576	2.04267e-07	5.07168e-06	7.2808	ENSRNOG00000048723	Pros1	protein S [Source:RGD Symbol;Acc:620971]
1.8768	2.08488	8.67159	2.05572e-07	5.08057e-06	7.13058	ENSRNOG00000000907	Alox5ap	arachidonate 5-lipoxygenase activating protein [Source:RGD Symbol;Acc:2097]
-0.62798	5.17013	-8.67165	2.05555e-07	5.08057e-06	7.19061	ENSRNOG00000012140	Cep89	centrosomal protein 89 [Source:RGD Symbol;Acc:1311730]
0.57405	7.6047	8.65098	2.12154e-07	5.23119e-06	7.02074	ENSRNOG00000021441	Reln	reelin [Source:RGD Symbol;Acc:3553]
2.40245	2.30715	8.6418	2.15156e-07	5.24982e-06	6.87337	ENSRNOG00000011054	Laptm5	lysosomal protein transmembrane 5 [Source:RGD Symbol;Acc:621838]
0.816572	5.23897	8.64587	2.13819e-07	5.24982e-06	7.17456	ENSRNOG00000020875	Celf3	CUGBP, Elav-like family member 3 [Source:RGD Symbol;Acc:1563168]
0.472841	7.74213	8.64309	2.14732e-07	5.24982e-06	7.00189	ENSRNOG00000047931	Tmsb4x	thymosin beta 4, X-linked [Source:RGD Symbol;Acc:621622]
-0.413041	8.96842	-8.64119	2.15357e-07	5.24982e-06	7.00915	ENSRNOG00000052583	Zfp106	zinc finger protein 106 [Source:RGD Symbol;Acc:1593644]
-2.06825	0.820946	-8.64226	2.15005e-07	5.24982e-06	6.93141	ENSRNOG00000009797	Aqp3	aquaporin 3 (Gill blood group) [Source:RGD Symbol;Acc:68428]
-0.856379	5.90254	-8.63756	2.16556e-07	5.26708e-06	7.03466	ENSRNOG00000008247	Ikbip	IKBKB interacting protein [Source:RGD Symbol;Acc:1305457]
0.442731	4.91405	8.62794	2.19775e-07	5.33327e-06	7.17056	ENSRNOG00000008016	Ckap4	cytoskeleton-associated protein 4 [Source:RGD Symbol;Acc:1311989]
1.16201	6.84362	8.6244	2.2097e-07	5.35016e-06	7.0247	ENSRNOG00000011931	Smarca2	SWI/SNF related, matrix associated, actin dependent regulator of chromatin, subfamily a, member 2 [Source:RGD Symbol;Acc:1302988]
-2.15066	3.75089	-8.60354	2.28158e-07	5.51177e-06	7.26498	ENSRNOG00000028765	Ttc24	tetratricopeptide repeat domain 24 [Source:RGD Symbol;Acc:2319887]
1.33414	3.71857	8.60074	2.29143e-07	5.52312e-06	7.33098	ENSRNOG00000040266	Cdkl4	cyclin-dependent kinase-like 4 [Source:RGD Symbol;Acc:1583704]
-0.758583	6.3882	-8.58238	2.35701e-07	5.66844e-06	6.92145	ENSRNOG00000009745	Ppp3cc	protein phosphatase 3 catalytic subunit gamma [Source:RGD Symbol;Acc:621616]
-0.644699	9.27044	-8.57589	2.38066e-07	5.71251e-06	6.91163	ENSRNOG00000051615	Hmgn2	high mobility group nucleosomal binding domain 2 [Source:RGD Symbol;Acc:620649]
-0.46464	5.35813	-8.57275	2.39222e-07	5.72285e-06	7.00043	ENSRNOG00000053510	Hcfc2	host cell factor C2 [Source:RGD Symbol;Acc:1307385]
-0.770762	7.95077	-8.5718	2.39571e-07	5.72285e-06	6.88779	ENSRNOG00000014434	Chd1	chromodomain helicase DNA binding protein 1 [Source:RGD Symbol;Acc:1306794]
-0.940586	3.36792	-8.57037	2.40097e-07	5.72285e-06	7.23717	ENSRNOG00000004968	Ncapg2	non-SMC condensin II complex, subunit G2 [Source:RGD Symbol;Acc:1308406]
0.433061	6.8773	8.56136	2.43454e-07	5.76861e-06	6.88962	ENSRNOG00000012448	Chrnb3	cholinergic receptor nicotinic beta 3 subunit [Source:RGD Symbol;Acc:621544]
-0.718204	5.23256	-8.56089	2.43631e-07	5.76861e-06	6.9859	ENSRNOG00000057384	Nfatc2ip	nuclear factor of activated T-cells 2 interacting protein [Source:RGD Symbol;Acc:1359096]
-0.901866	4.13002	-8.56298	2.42846e-07	5.76861e-06	7.14303	ENSRNOG00000050647	Hspa1b	heat shock protein family A (Hsp70) member 1B [Source:RGD Symbol;Acc:1593284]
0.571356	5.47824	8.55399	2.46233e-07	5.8174e-06	6.99368	ENSRNOG00000003121	Rtn4rl1	reticulon 4 receptor-like 1 [Source:RGD Symbol;Acc:727812]
0.756928	3.44383	8.54011	2.51564e-07	5.93027e-06	7.2335	ENSRNOG00000002832	Slc16a2	solute carrier family 16 member 2 [Source:RGD Symbol;Acc:628608]
-1.7691	1.61511	-8.52558	2.57272e-07	6.04941e-06	6.98758	ENSRNOG00000032596	RT1-T24-3	RT1 class I, locus T24, gene 3 [Source:RGD Symbol;Acc:1624211]
-1.97145	2.32929	-8.52439	2.57746e-07	6.04941e-06	7.1289	ENSRNOG00000047517	Oxld1	oxidoreductase-like domain containing 1 [Source:RGD Symbol;Acc:1590060]
-0.617282	6.34726	-8.52248	2.5851e-07	6.0541e-06	6.82708	ENSRNOG00000018657	Scrn3	secernin 3 [Source:RGD Symbol;Acc:1305064]
0.388836	8.20265	8.51926	2.59799e-07	6.06295e-06	6.80533	ENSRNOG00000015124	Gpam	glycerol-3-phosphate acyltransferase, mitochondrial [Source:RGD Symbol;Acc:61847]
-0.742035	7.40122	-8.51871	2.60018e-07	6.06295e-06	6.80071	ENSRNOG00000006644	Kdm4c	lysine demethylase 4C [Source:RGD Symbol;Acc:1307528]
-1.13374	3.54695	-8.51277	2.6242e-07	6.10568e-06	7.10527	ENSRNOG00000038819	C16h4orf47	similar to human chromosome 4 open reading frame 47 [Source:RGD Symbol;Acc:1564308]
-0.868328	6.58615	-8.50739	2.64611e-07	6.14332e-06	6.80929	ENSRNOG00000019020	Bbs2	Bardet-Biedl syndrome 2 [Source:RGD Symbol;Acc:71091]
-0.578789	6.64871	-8.49537	2.69581e-07	6.24519e-06	6.77552	ENSRNOG00000010903	Crb1	crumbs cell polarity complex component 1 [Source:RGD Symbol;Acc:1309947]
0.673042	5.45952	8.46628	2.82022e-07	6.49135e-06	6.88114	ENSRNOG00000024435	Galnt17	polypeptide N-acetylgalactosaminyltransferase 17 [Source:RGD Symbol;Acc:1563452]
-0.957485	6.32731	-8.46785	2.81336e-07	6.49135e-06	6.73845	ENSRNOG00000001654	Cpox	coproporphyrinogen oxidase [Source:RGD Symbol;Acc:1311817]
-1.04323	1.87903	-8.46715	2.81639e-07	6.49135e-06	7.09005	ENSRNOG00000013318	Ccdc150	coiled-coil domain containing 150 [Source:RGD Symbol;Acc:1304775]
-0.359543	7.42646	-8.44926	2.89578e-07	6.651e-06	6.69133	ENSRNOG00000013729	RGD1306271	similar to KIAA1549 protein [Source:RGD Symbol;Acc:1306271]
-0.419106	5.74093	-8.42785	2.99385e-07	6.84692e-06	6.72768	ENSRNOG00000043357	Zfp407	zinc finger protein 407 [Source:RGD Symbol;Acc:1310645]
-1.19102	6.71751	-8.42862	2.99027e-07	6.84692e-06	6.70113	ENSRNOG00000007687	Sema7a	semaphorin 7A (John Milton Hagen blood group) [Source:RGD Symbol;Acc:1305192]
1.19897	4.47573	8.42048	3.02841e-07	6.9024e-06	6.91728	ENSRNOG00000019776	Sh3gl3	SH3 domain containing GRB2 like 3, endophilin A3 [Source:RGD Symbol;Acc:620578]
-0.683172	6.77631	-8.41993	3.03098e-07	6.9024e-06	6.64808	ENSRNOG00000014341	Btbd10	BTB domain containing 10 [Source:RGD Symbol;Acc:1306301]
1.10606	4.2672	8.41443	3.05709e-07	6.94712e-06	6.96172	ENSRNOG00000016257	Cotl1	coactosin-like F-actin binding protein 1 [Source:RGD Symbol;Acc:1305498]
0.514651	5.4358	8.41137	3.07172e-07	6.9656e-06	6.761	ENSRNOG00000009951	Aif1l	allograft inflammatory factor 1-like [Source:RGD Symbol;Acc:1305081]
-1.54058	1.63586	-8.40864	3.08481e-07	6.98052e-06	6.89312	ENSRNOG00000054495	Cldn2	claudin 2 [Source:RGD Symbol;Acc:1560247]
0.422197	9.8531	8.4061	3.09705e-07	6.99348e-06	6.64907	ENSRNOG00000046005	Scd2	stearoyl-Coenzyme A desaturase 2 [Source:RGD Symbol;Acc:621177]
1.06658	4.73287	8.40045	3.1245e-07	7.04063e-06	6.87129	ENSRNOG00000019041	Psme1	proteasome activator subunit 1 [Source:RGD Symbol;Acc:3429]
1.14322	2.43039	8.39626	3.14495e-07	7.07186e-06	7.00734	ENSRNOG00000060348	Zdhhc23	zinc finger DHHC-type palmitoyltransferase 23 [Source:RGD Symbol;Acc:1303254]
0.611848	5.31338	8.39034	3.17416e-07	7.12259e-06	6.75033	ENSRNOG00000004695	Celf5	CUGBP, Elav-like family member 5 [Source:RGD Symbol;Acc:1565016]
0.610776	5.46988	8.38068	3.22245e-07	7.21586e-06	6.72954	ENSRNOG00000014751	Ret	ret proto-oncogene [Source:RGD Symbol;Acc:3556]
-0.848135	4.72461	-8.37498	3.2513e-07	7.26529e-06	6.73685	ENSRNOG00000011376	Bbof1	basal body orientation factor 1 [Source:RGD Symbol;Acc:1560978]
-0.379974	5.84851	-8.36795	3.28721e-07	7.33027e-06	6.62954	ENSRNOG00000025222	Pcid2	PCI domain containing 2 [Source:RGD Symbol;Acc:1307041]
-0.541213	5.1239	-8.36263	3.31472e-07	7.37628e-06	6.68021	ENSRNOG00000018193	Poc5	POC5 centriolar protein [Source:RGD Symbol;Acc:1310597]
1.02094	3.36493	8.35824	3.33758e-07	7.39646e-06	6.96583	ENSRNOG00000020811	Il6r	interleukin 6 receptor [Source:RGD Symbol;Acc:2902]
-0.801144	3.71095	-8.35931	3.33196e-07	7.39646e-06	6.87354	ENSRNOG00000023548	Sned1	sushi, nidogen and EGF-like domains 1 [Source:RGD Symbol;Acc:1566079]
0.855418	3.46072	8.34559	3.40435e-07	7.52889e-06	6.95608	ENSRNOG00000048433	Tshz2	teashirt zinc finger homeobox 2 [Source:RGD Symbol;Acc:6490867]
1.16599	4.72326	8.34046	3.43184e-07	7.54537e-06	6.73379	ENSRNOG00000018570	C1qtnf3	C1q and TNF related 3 [Source:RGD Symbol;Acc:1305010]
0.77031	4.78348	8.34026	3.43291e-07	7.54537e-06	6.74432	ENSRNOG00000042980	Adam19	ADAM metallopeptidase domain 19 [Source:RGD Symbol;Acc:1585017]
0.343412	6.25348	8.3418	3.42463e-07	7.54537e-06	6.57085	ENSRNOG00000029871	Slc8a3	solute carrier family 8 member A3 [Source:RGD Symbol;Acc:620197]
-0.673812	7.13398	-8.33881	3.44074e-07	7.54712e-06	6.51111	ENSRNOG00000008524	Glcci1	glucocorticoid induced 1 [Source:RGD Symbol;Acc:1563612]
0.770383	5.21348	8.32102	3.53811e-07	7.74486e-06	6.67736	ENSRNOG00000042320	Slc41a1	solute carrier family 41 member 1 [Source:RGD Symbol;Acc:1311397]
-1.62384	1.15011	-8.30944	3.60305e-07	7.87095e-06	6.62908	ENSRNOG00000007395	Baat	bile acid CoA:amino acid N-acyltransferase [Source:RGD Symbol;Acc:2190]
-1.20941	3.72422	-8.30254	3.64234e-07	7.93738e-06	6.80959	ENSRNOG00000020344	Sntb2	syntrophin, beta 2 [Source:RGD Symbol;Acc:1592340]
-2.41315	2.29527	-8.30151	3.64826e-07	7.93738e-06	6.88424	ENSRNOG00000052915	NA	NA
0.699643	4.54087	8.2846	3.74667e-07	8.13497e-06	6.68007	ENSRNOG00000033608	Cd276	Cd276 molecule [Source:RGD Symbol;Acc:727815]
-0.880632	6.40592	-8.27751	3.7887e-07	8.20961e-06	6.42775	ENSRNOG00000059876	Fsd1l	fibronectin type III and SPRY domain containing 1-like [Source:RGD Symbol;Acc:1564809]
-0.971022	2.46219	-8.27449	3.80678e-07	8.23216e-06	6.85301	ENSRNOG00000000917	Nupr2	nuclear protein 2, transcriptional regulator [Source:RGD Symbol;Acc:1560258]
1.63459	2.99882	8.27142	3.82523e-07	8.23883e-06	6.85522	ENSRNOG00000017191	Trim5	tripartite motif-containing 5 [Source:RGD Symbol;Acc:1304579]
-0.35941	7.6434	-8.27199	3.82182e-07	8.23883e-06	6.40249	ENSRNOG00000011854	Dennd11	DENN domain containing 11 [Source:RGD Symbol;Acc:1563986]
-1.02608	5.61399	-8.26657	3.85459e-07	8.28543e-06	6.45148	ENSRNOG00000016216	Sft2d3	SFT2 domain containing 3 [Source:RGD Symbol;Acc:1561764]
0.416272	6.27269	8.26437	3.86802e-07	8.29768e-06	6.4378	ENSRNOG00000026866	Syn3	synapsin III [Source:RGD Symbol;Acc:3799]
-0.547464	3.55797	-8.26074	3.89023e-07	8.32866e-06	6.72825	ENSRNOG00000056062	LOC100912787	zinc finger protein 850-like [Source:RGD Symbol;Acc:6485475]
-1.18379	2.42399	-8.2565	3.91632e-07	8.36783e-06	6.80865	ENSRNOG00000008086	Dpf3	double PHD fingers 3 [Source:RGD Symbol;Acc:1309052]
-0.614596	4.23222	-8.25508	3.92509e-07	8.36989e-06	6.60778	ENSRNOG00000061612	Zfp184	zinc finger protein 184 [Source:RGD Symbol;Acc:1304798]
-1.04497	4.06915	-8.24951	3.95978e-07	8.4271e-06	6.61745	ENSRNOG00000015423	Ccna2	cyclin A2 [Source:RGD Symbol;Acc:621059]
1.73741	3.95867	8.24761	3.97169e-07	8.43276e-06	6.74632	ENSRNOG00000002045	Anxa3	annexin A3 [Source:RGD Symbol;Acc:2119]
-0.989095	8.58597	-8.24658	3.97816e-07	8.43276e-06	6.36931	ENSRNOG00000005464	Lgalsl	galectin-like [Source:RGD Symbol;Acc:1307414]
0.659929	5.58955	8.23739	4.03633e-07	8.53918e-06	6.47858	ENSRNOG00000012787	Tmem164	transmembrane protein 164 [Source:RGD Symbol;Acc:1563286]
0.778097	4.60829	8.23461	4.05413e-07	8.55995e-06	6.59625	ENSRNOG00000000924	Slc7a1	solute carrier family 7 member 1 [Source:RGD Symbol;Acc:3716]
0.341241	7.40763	8.23282	4.06562e-07	8.56735e-06	6.3434	ENSRNOG00000004602	Rnf145	ring finger protein 145 [Source:RGD Symbol;Acc:1309561]
-0.590251	6.04816	-8.19824	4.29439e-07	9.0317e-06	6.32263	ENSRNOG00000055365	Edem1	ER degradation enhancing alpha-mannosidase like protein 1 [Source:RGD Symbol;Acc:1563633]
-0.693078	8.47999	-8.19646	4.30649e-07	9.03942e-06	6.2854	ENSRNOG00000020330	Wdr47	WD repeat domain 47 [Source:RGD Symbol;Acc:1309181]
0.426426	6.41071	8.19323	4.32861e-07	9.0681e-06	6.31496	ENSRNOG00000012148	Trio	trio Rho guanine nucleotide exchange factor [Source:RGD Symbol;Acc:1308360]
0.953208	3.07899	8.16611	4.51906e-07	9.44863e-06	6.68127	ENSRNOG00000060984	Dnah7	dynein, axonemal, heavy chain 7 [Source:RGD Symbol;Acc:621798]
-0.72565	7.9423	-8.15108	4.62837e-07	9.65834e-06	6.20545	ENSRNOG00000003901	Cfap36	cilia and flagella associated protein 36 [Source:RGD Symbol;Acc:1311732]
-0.714782	6.39916	-8.13871	4.72043e-07	9.83133e-06	6.19909	ENSRNOG00000005045	Ppp2r5e	protein phosphatase 2 regulatory subunit B', epsilon [Source:RGD Symbol;Acc:1305657]
0.307805	7.3584	8.12904	4.79372e-07	9.96462e-06	6.17343	ENSRNOG00000011705	Stmn2	stathmin 2 [Source:RGD Symbol;Acc:68947]
-0.41543	7.29991	-8.12239	4.84484e-07	1.00514e-05	6.16017	ENSRNOG00000020056	Retreg3	reticulophagy regulator family member 3 [Source:RGD Symbol;Acc:1561189]
-0.442738	5.66153	-8.11369	4.91255e-07	1.01722e-05	6.2258	ENSRNOG00000018411	Pold3	DNA polymerase delta 3, accessory subunit [Source:RGD Symbol;Acc:1312027]
-1.17346	7.32515	-8.11109	4.93296e-07	1.01948e-05	6.13792	ENSRNOG00000022166	Ammecr1	AMMECR nuclear protein 1 [Source:RGD Symbol;Acc:1561004]
1.0988	6.57438	8.10174	5.00714e-07	1.03282e-05	6.20552	ENSRNOG00000060098	Ptms	parathymosin [Source:RGD Symbol;Acc:621529]
1.24027	2.73746	8.09341	5.07426e-07	1.04465e-05	6.58175	ENSRNOG00000060237	Inhbb	inhibin subunit beta B [Source:RGD Symbol;Acc:2913]
-2.21385	1.87693	-8.0884	5.11507e-07	1.05104e-05	6.13319	ENSRNOG00000053811	Arg2	arginase 2 [Source:RGD Symbol;Acc:2151]
-0.318746	6.14977	-8.07974	5.18643e-07	1.06367e-05	6.12597	ENSRNOG00000006069	Eif2ak3	eukaryotic translation initiation factor 2 alpha kinase 3 [Source:RGD Symbol;Acc:70884]
0.46049	9.10407	8.07776	5.20282e-07	1.06499e-05	6.09743	ENSRNOG00000031890	Ncam1	neural cell adhesion molecule 1 [Source:RGD Symbol;Acc:67378]
0.945901	5.52303	8.06314	5.32609e-07	1.08815e-05	6.1715	ENSRNOG00000026128	Cpne8	copine 8 [Source:RGD Symbol;Acc:1307939]
1.24857	3.82782	8.06024	5.35092e-07	1.09114e-05	6.4075	ENSRNOG00000013902	P2ry12	purinergic receptor P2Y12 [Source:RGD Symbol;Acc:621681]
1.1619	3.16157	8.05638	5.38413e-07	1.09583e-05	6.52391	ENSRNOG00000016831	Serpinh1	serpin family H member 1 [Source:RGD Symbol;Acc:69302]
-0.732706	4.96808	-8.05133	5.42791e-07	1.10265e-05	6.18608	ENSRNOG00000049856	Zfp617	zinc finger protein 617 [Source:RGD Symbol;Acc:2319713]
0.667895	3.92406	8.03305	5.5895e-07	1.13333e-05	6.38675	ENSRNOG00000000925	Psph	phosphoserine phosphatase [Source:RGD Symbol;Acc:1308764]
-0.452473	5.27689	-8.03151	5.60329e-07	1.13398e-05	6.12811	ENSRNOG00000025286	Pank2	pantothenate kinase 2 [Source:RGD Symbol;Acc:1305169]
0.604664	5.96506	8.02225	5.68736e-07	1.14882e-05	6.05963	ENSRNOG00000008116	Plpp3	phospholipid phosphatase 3 [Source:RGD Symbol;Acc:620454]
0.864842	3.1154	8.00691	5.82934e-07	1.16676e-05	6.42855	ENSRNOG00000008356	Myo5c	myosin VC [Source:RGD Symbol;Acc:1309994]
0.53218	4.86238	8.00814	5.81781e-07	1.16676e-05	6.16496	ENSRNOG00000053200	Dock10	dedicator of cytokinesis 10 [Source:RGD Symbol;Acc:1561963]
-0.558825	3.93409	-8.0081	5.81819e-07	1.16676e-05	6.25782	ENSRNOG00000005274	Vrk1	VRK serine/threonine kinase 1 [Source:RGD Symbol;Acc:1306069]
-0.796591	9.53473	-8.00703	5.82826e-07	1.16676e-05	5.99133	ENSRNOG00000010819	Hspa4l	heat shock protein family A (Hsp70) member 4 like [Source:RGD Symbol;Acc:1306528]
-0.856254	7.69343	-8.00678	5.83055e-07	1.16676e-05	5.96525	ENSRNOG00000012255	Ktn1	kinectin 1 [Source:RGD Symbol;Acc:1308719]
-1.05869	6.30206	-7.99952	5.89914e-07	1.17829e-05	5.99986	ENSRNOG00000027392	Ccdc187	coiled-coil domain containing 187 [Source:RGD Symbol;Acc:1565512]
0.524014	5.35211	7.99696	5.92355e-07	1.18097e-05	6.11402	ENSRNOG00000015614	Ppp1r16b	protein phosphatase 1, regulatory subunit 16B [Source:RGD Symbol;Acc:1589460]
-0.701495	4.75967	-7.99113	5.97939e-07	1.18989e-05	6.10591	ENSRNOG00000014240	Trmt11	tRNA methyltransferase 11 homolog [Source:RGD Symbol;Acc:727798]
1.1718	3.28448	7.98805	6.0092e-07	1.19361e-05	6.41691	ENSRNOG00000006956	Adamtsl1	ADAMTS-like 1 [Source:RGD Symbol;Acc:1306439]
-0.672508	5.6114	-7.98332	6.0551e-07	1.2005e-05	6.00784	ENSRNOG00000006622	Cry1	cryptochrome circadian regulator 1 [Source:RGD Symbol;Acc:735083]
0.740518	8.02467	7.98183	6.06969e-07	1.20117e-05	5.92585	ENSRNOG00000032922	Dclk1	doublecortin-like kinase 1 [Source:RGD Symbol;Acc:68437]
-0.566086	7.27734	-7.98014	6.08623e-07	1.20223e-05	5.91973	ENSRNOG00000016187	Tmem67	transmembrane protein 67 [Source:RGD Symbol;Acc:1586167]
-0.359165	7.46632	-7.9701	6.18563e-07	1.21932e-05	5.90407	ENSRNOG00000004841	Akap6	A-kinase anchoring protein 6 [Source:RGD Symbol;Acc:69412]
-0.56051	4.77768	-7.96912	6.1955e-07	1.21932e-05	6.11	ENSRNOG00000036719	Samd10	sterile alpha motif domain containing 10 [Source:RGD Symbol;Acc:1563203]
-0.410628	7.5986	-7.96599	6.22684e-07	1.22324e-05	5.89612	ENSRNOG00000000236	Zfp207	zinc finger protein 207 [Source:RGD Symbol;Acc:1308121]
2.45055	3.44405	7.9619	6.26811e-07	1.2291e-05	6.30675	ENSRNOG00000054548	Srpk3	SRSF protein kinase 3 [Source:RGD Symbol;Acc:727856]
-0.484829	5.99116	-7.95028	6.38684e-07	1.2501e-05	5.91636	ENSRNOG00000003946	Tor1aip1	torsin 1A interacting protein 1 [Source:RGD Symbol;Acc:628851]
0.944602	3.5928	7.94316	6.46082e-07	1.26227e-05	6.24838	ENSRNOG00000036829	Nckap1l	NCK associated protein 1 like [Source:RGD Symbol;Acc:1312032]
0.526957	7.11037	7.94136	6.47966e-07	1.26365e-05	5.86556	ENSRNOG00000057221	Scn3b	sodium voltage-gated channel beta subunit 3 [Source:RGD Symbol;Acc:621657]
-1.06236	2.93772	-7.93848	6.50994e-07	1.26725e-05	6.32037	ENSRNOG00000006575	Ccdc96	coiled-coil domain containing 96 [Source:RGD Symbol;Acc:1305153]
0.763101	3.86373	7.93036	6.59607e-07	1.28169e-05	6.18889	ENSRNOG00000003613	Mid1	midline 1 [Source:RGD Symbol;Acc:2640]
-1.21072	3.22322	-7.92655	6.63691e-07	1.2873e-05	6.2076	ENSRNOG00000010345	Ssmem1	serine-rich single-pass membrane protein 1 [Source:RGD Symbol;Acc:1559502]
0.582208	6.50603	7.92199	6.6861e-07	1.28994e-05	5.87974	ENSRNOG00000014508	Mgll	monoglyceride lipase [Source:RGD Symbol;Acc:71039]
0.564823	5.17391	7.91862	6.72269e-07	1.28994e-05	5.98892	ENSRNOG00000026705	Dgki	diacylglycerol kinase, iota [Source:RGD Symbol;Acc:735049]
0.325216	8.29907	7.92238	6.68185e-07	1.28994e-05	5.82809	ENSRNOG00000061543	Ap2b1	adaptor related protein complex 2 subunit beta 1 [Source:RGD Symbol;Acc:71048]
-0.56533	8.59718	-7.92149	6.69148e-07	1.28994e-05	5.83053	ENSRNOG00000052061	Ppef2	protein phosphatase with EF-hand domain 2 [Source:RGD Symbol;Acc:1307093]
-0.602211	6.75502	-7.91996	6.70813e-07	1.28994e-05	5.82674	ENSRNOG00000054264	Nfatc3	nuclear factor of activated T-cells 3 [Source:RGD Symbol;Acc:1308692]
-0.786035	5.30239	-7.91955	6.71254e-07	1.28994e-05	5.91634	ENSRNOG00000061862	Zbtb10	zinc finger and BTB domain containing 10 [Source:RGD Symbol;Acc:708377]
-0.468666	6.92472	-7.91162	6.79938e-07	1.30232e-05	5.81153	ENSRNOG00000012654	Vps36	vacuolar protein sorting 36 homolog [Source:RGD Symbol;Acc:1309754]
0.979379	4.4963	7.90735	6.8467e-07	1.30756e-05	6.1184	ENSRNOG00000056184	Lrp2	LDL receptor related protein 2 [Source:RGD Symbol;Acc:68407]
0.714036	3.58584	7.90695	6.85111e-07	1.30756e-05	6.21505	ENSRNOG00000039582	Cspg4b	chondroitin sulfate proteoglycan 4B [Source:RGD Symbol;Acc:1561161]
0.560421	7.16562	7.89597	6.9743e-07	1.32871e-05	5.7865	ENSRNOG00000000875	Fhl1	four and a half LIM domains 1 [Source:RGD Symbol;Acc:2615]
1.13582	3.65796	7.89452	6.99068e-07	1.32947e-05	6.21014	ENSRNOG00000003183	Fmod	fibromodulin [Source:RGD Symbol;Acc:619769]
0.542563	4.38755	7.89312	7.00659e-07	1.33014e-05	6.06144	ENSRNOG00000003929	Pcdh19	protocadherin 19 [Source:RGD Symbol;Acc:1565392]
-1.3989	2.22294	-7.87924	7.16639e-07	1.35807e-05	6.24058	ENSRNOG00000004476	Wif1	Wnt inhibitory factor 1 [Source:RGD Symbol;Acc:619774]
-0.619723	7.4741	-7.871	7.26302e-07	1.37154e-05	5.73628	ENSRNOG00000027921	Rlf	RLF zinc finger [Source:RGD Symbol;Acc:1305297]
-0.650169	3.30868	-7.87197	7.25162e-07	1.37154e-05	6.12423	ENSRNOG00000007292	Spdl1	spindle apparatus coiled-coil protein 1 [Source:RGD Symbol;Acc:1306908]
-0.287325	6.81506	-7.86662	7.31497e-07	1.37892e-05	5.74082	ENSRNOG00000005016	Tmed4	transmembrane p24 trafficking protein 4 [Source:RGD Symbol;Acc:1306319]
-0.921555	7.94668	-7.8593	7.40274e-07	1.39301e-05	5.71973	ENSRNOG00000001689	Arl6	ADP-ribosylation factor like GTPase 6 [Source:RGD Symbol;Acc:1305535]
0.882575	4.39801	7.8564	7.43767e-07	1.39677e-05	5.97512	ENSRNOG00000006068	Tmem117	transmembrane protein 117 [Source:RGD Symbol;Acc:1562562]
0.846978	3.02493	7.85549	7.44873e-07	1.39677e-05	6.20396	ENSRNOG00000016346	Prkcd	protein kinase C, delta [Source:RGD Symbol;Acc:67383]
-0.592012	8.34689	-7.8478	7.54271e-07	1.41192e-05	5.70411	ENSRNOG00000034013	Acaca	acetyl-CoA carboxylase alpha [Source:RGD Symbol;Acc:621248]
0.51555	8.14576	7.84603	7.56444e-07	1.41352e-05	5.70096	ENSRNOG00000010217	Prrc2b	proline-rich coiled-coil 2B [Source:RGD Symbol;Acc:1595906]
-0.66364	4.91889	-7.84486	7.57892e-07	1.41377e-05	5.85233	ENSRNOG00000004493	Tasp1	taspase 1 [Source:RGD Symbol;Acc:1308591]
-0.879974	5.1168	-7.83816	7.66211e-07	1.4268e-05	5.79235	ENSRNOG00000050469	Gng11	G protein subunit gamma 11 [Source:RGD Symbol;Acc:621515]
0.462526	5.21417	7.83374	7.71763e-07	1.43465e-05	5.8443	ENSRNOG00000028746	Gsto1	glutathione S-transferase omega 1 [Source:RGD Symbol;Acc:70952]
0.578171	5.92287	7.83183	7.74171e-07	1.43664e-05	5.77259	ENSRNOG00000007646	Sipa1l1	signal-induced proliferation-associated 1 like 1 [Source:RGD Symbol;Acc:708497]
0.435833	5.04159	7.82682	7.80516e-07	1.44362e-05	5.84909	ENSRNOG00000024825	Fam163a	family with sequence similarity 163, member A [Source:RGD Symbol;Acc:1565760]
-0.485025	5.1429	-7.82674	7.80629e-07	1.44362e-05	5.80965	ENSRNOG00000012726	Zbtb5	zinc finger and BTB domain containing 5 [Source:RGD Symbol;Acc:1307367]
0.483819	6.21192	7.82182	7.86915e-07	1.45275e-05	5.71864	ENSRNOG00000016550	Dclk2	doublecortin-like kinase 2 [Source:RGD Symbol;Acc:1308384]
0.501236	4.33896	7.81466	7.96182e-07	1.4603e-05	5.93103	ENSRNOG00000020081	As3mt	arsenite methyltransferase [Source:RGD Symbol;Acc:621325]
0.351612	8.75913	7.81535	7.95278e-07	1.4603e-05	5.65285	ENSRNOG00000015093	Sparcl1	SPARC like 1 [Source:RGD Symbol;Acc:2531]
-0.492149	6.35891	-7.81452	7.96363e-07	1.4603e-05	5.66538	ENSRNOG00000017502	Sike1	suppressor of IKBKE 1 [Source:RGD Symbol;Acc:1311316]
-0.810561	2.97892	-7.81445	7.9645e-07	1.4603e-05	6.06407	ENSRNOG00000010071	C2h4orf46	similar to human chromosome 4 open reading frame 46 [Source:RGD Symbol;Acc:1560010]
7.45596	-0.267747	7.81192	7.99747e-07	1.46384e-05	-0.276536	ENSRNOG00000011040	Tomm70-ps1	translocase of outer mitochondrial membrane 70, pseudogene 1 [Source:RGD Symbol;Acc:1595482]
0.383754	8.76766	7.80567	8.07964e-07	1.47636e-05	5.6368	ENSRNOG00000046996	Pea15	proliferation and apoptosis adaptor protein 15 [Source:RGD Symbol;Acc:1306055]
-3.69125	0.823427	-7.80235	8.12363e-07	1.48187e-05	4.29163	ENSRNOG00000013433	Gnrh1	gonadotropin releasing hormone 1 [Source:RGD Symbol;Acc:2720]
-0.761987	6.85858	-7.79623	8.20526e-07	1.49422e-05	5.6269	ENSRNOG00000014538	Nxnl2	nucleoredoxin-like 2 [Source:RGD Symbol;Acc:1594820]
0.332975	6.01011	7.75969	8.71161e-07	1.58374e-05	5.62437	ENSRNOG00000002079	Mapk10	mitogen activated protein kinase 10 [Source:RGD Symbol;Acc:3663]
-0.89836	8.76129	-7.74709	8.8937e-07	1.61411e-05	5.53904	ENSRNOG00000016779	Fam120a	family with sequence similarity 120A [Source:RGD Symbol;Acc:1306643]
-1.47704	4.55198	-7.7448	8.92726e-07	1.61746e-05	5.82307	ENSRNOG00000013954	Alpl	alkaline phosphatase, biomineralization associated [Source:RGD Symbol;Acc:2100]
-0.529331	7.02395	-7.73061	9.13783e-07	1.65282e-05	5.50232	ENSRNOG00000007690	Cmpk2	cytidine/uridine monophosphate kinase 2 [Source:RGD Symbol;Acc:1305881]
-0.591199	6.30732	-7.724	9.23773e-07	1.66808e-05	5.51937	ENSRNOG00000019943	Slc7a6	solute carrier family 7 member 6 [Source:RGD Symbol;Acc:1309193]
-0.334677	6.60278	-7.72096	9.28417e-07	1.67365e-05	5.50221	ENSRNOG00000021129	Garre1	granule associated Rac and RHOG effector 1 [Source:RGD Symbol;Acc:1308428]
0.700533	4.42231	7.70547	9.52398e-07	1.714e-05	5.72343	ENSRNOG00000051100	NA	NA
-0.644552	5.7494	-7.70422	9.54366e-07	1.71466e-05	5.5206	ENSRNOG00000002884	Blzf1	basic leucine zipper nuclear factor 1 [Source:RGD Symbol;Acc:1562452]
-0.532222	6.22199	-7.69482	9.69274e-07	1.73853e-05	5.46613	ENSRNOG00000047984	Mrps22	mitochondrial ribosomal protein S22 [Source:RGD Symbol;Acc:1585674]
0.438696	4.81047	7.69109	9.75252e-07	1.74634e-05	5.64342	ENSRNOG00000006628	Dusp16	dual specificity phosphatase 16 [Source:RGD Symbol;Acc:1310721]
1.17543	2.01862	7.6895	9.77816e-07	1.74801e-05	5.85568	ENSRNOG00000002413	Gpc4	glypican 4 [Source:RGD Symbol;Acc:1359399]
-0.43745	7.94375	-7.68495	9.85187e-07	1.75826e-05	5.42288	ENSRNOG00000003882	Cep350	centrosomal protein 350 [Source:RGD Symbol;Acc:621162]
0.503176	5.29655	7.68329	9.87887e-07	1.76015e-05	5.5654	ENSRNOG00000005879	Maml2	mastermind-like transcriptional coactivator 2 [Source:RGD Symbol;Acc:1587536]
-1.28717	4.63166	-7.68116	9.91366e-07	1.76342e-05	5.58972	ENSRNOG00000016459	Eif3j	eukaryotic translation initiation factor 3, subunit J [Source:RGD Symbol;Acc:1593338]
-0.554212	6.67825	-7.67489	1.00169e-06	1.77588e-05	5.4135	ENSRNOG00000020392	Stxbp3	syntaxin binding protein 3 [Source:RGD Symbol;Acc:619968]
-1.04649	4.80474	-7.67545	1.00077e-06	1.77588e-05	5.57239	ENSRNOG00000005615	Gadd45a	growth arrest and DNA-damage-inducible, alpha [Source:RGD Symbol;Acc:2654]
0.4628	4.59673	7.66401	1.01985e-06	1.80511e-05	5.63049	ENSRNOG00000005033	Acvr1	activin A receptor type 1 [Source:RGD Symbol;Acc:620200]
2.03345	1.67623	7.66129	1.02446e-06	1.80874e-05	5.31015	ENSRNOG00000005620	Lcp2	lymphocyte cytosolic protein 2 [Source:RGD Symbol;Acc:619743]
-0.696345	6.74398	-7.66081	1.02528e-06	1.80874e-05	5.38873	ENSRNOG00000014886	Fam107b	family with sequence similarity 107, member B [Source:RGD Symbol;Acc:1561482]
0.587214	7.87483	7.6505	1.0429e-06	1.8338e-05	5.36588	ENSRNOG00000003512	Gabra1	gamma-aminobutyric acid type A receptor subunit alpha 1 [Source:RGD Symbol;Acc:61855]
-0.509054	8.41137	-7.65064	1.04267e-06	1.8338e-05	5.36856	ENSRNOG00000030667	Ppm1b	protein phosphatase, Mg2+/Mn2+ dependent, 1B [Source:RGD Symbol;Acc:3374]
0.591135	4.51863	7.64736	1.04835e-06	1.83735e-05	5.63675	ENSRNOG00000004279	Adgra3	adhesion G protein-coupled receptor A3 [Source:RGD Symbol;Acc:1304914]
-0.520493	4.53893	-7.64749	1.04812e-06	1.83735e-05	5.581	ENSRNOG00000028341	Alkbh5	alkB homolog 5, RNA demethylase [Source:RGD Symbol;Acc:1309496]
0.716957	4.7166	7.64128	1.05896e-06	1.84989e-05	5.64132	ENSRNOG00000009411	Chn2	chimerin 2 [Source:RGD Symbol;Acc:620140]
0.383892	6.70414	7.6415	1.05857e-06	1.84989e-05	5.3714	ENSRNOG00000023312	Lonrf2	LON peptidase N-terminal domain and ring finger 2 [Source:RGD Symbol;Acc:1562137]
1.65494	2.91713	7.63632	1.06768e-06	1.86211e-05	5.8452	ENSRNOG00000016873	Msrb2	methionine sulfoxide reductase B2 [Source:RGD Symbol;Acc:1306026]
-0.675596	7.30205	-7.63461	1.07072e-06	1.86438e-05	5.33475	ENSRNOG00000059593	Cetn2	centrin 2 [Source:RGD Symbol;Acc:620247]
0.350535	7.07617	7.63242	1.0746e-06	1.86811e-05	5.34467	ENSRNOG00000008000	Syt13	synaptotagmin 13 [Source:RGD Symbol;Acc:621877]
1.26086	2.91379	7.62102	1.09512e-06	1.89932e-05	5.83173	ENSRNOG00000001192	Gltp	glycolipid transfer protein [Source:RGD Symbol;Acc:1564442]
-1.49304	2.90167	-7.62048	1.0961e-06	1.89932e-05	5.83078	ENSRNOG00000016525	Susd3	sushi domain containing 3 [Source:RGD Symbol;Acc:1310933]
1.68203	1.94908	7.61296	1.10987e-06	1.9139e-05	5.72908	ENSRNOG00000017803	Apbb1ip	amyloid beta precursor protein binding family B member 1 interacting protein [Source:RGD Symbol;Acc:1304795]
1.01583	5.08171	7.61296	1.10986e-06	1.9139e-05	5.54703	ENSRNOG00000029535	Nrbp2	nuclear receptor binding protein 2 [Source:RGD Symbol;Acc:1591749]
-1.38256	4.05458	-7.61452	1.107e-06	1.9139e-05	5.55751	ENSRNOG00000026310	Marchf1	membrane associated ring-CH-type finger 1 [Source:RGD Symbol;Acc:1305148]
3.65405	1.82431	7.61139	1.11275e-06	1.91579e-05	4.46733	ENSRNOG00000010208	Timp1	TIMP metallopeptidase inhibitor 1 [Source:RGD Symbol;Acc:621675]
0.67531	3.89447	7.60604	1.1227e-06	1.92673e-05	5.62563	ENSRNOG00000038480	Ppp1r36	protein phosphatase 1, regulatory subunit 36 [Source:RGD Symbol;Acc:1309051]
-0.611891	5.99015	-7.60642	1.12198e-06	1.92673e-05	5.32985	ENSRNOG00000049633	Flvcr1	FLVCR heme transporter 1 [Source:RGD Symbol;Acc:1596541]
0.321019	8.36482	7.60479	1.12502e-06	1.92763e-05	5.28904	ENSRNOG00000009636	Scrn1	secernin 1 [Source:RGD Symbol;Acc:1560999]
-1.50655	5.83105	-7.59928	1.13537e-06	1.94227e-05	5.3477	ENSRNOG00000032902	Ybx1-ps20	Y box binding protein 1, pseudogene 20 [Source:RGD Symbol;Acc:1590933]
-0.696465	4.99667	-7.59758	1.13858e-06	1.94387e-05	5.46326	ENSRNOG00000020202	Asrgl1	asparaginase and isoaspartyl peptidase 1 [Source:RGD Symbol;Acc:708526]
-0.824547	4.11524	-7.59686	1.13994e-06	1.94387e-05	5.5421	ENSRNOG00000032136	Cdc42ep3	CDC42 effector protein 3 [Source:RGD Symbol;Acc:1305858]
-1.05083	3.09871	-7.59168	1.1498e-06	1.95758e-05	5.66617	ENSRNOG00000005918	C8h11orf71	similar to human chromosome 11 open reading frame 71 [Source:RGD Symbol;Acc:1563941]
1.89898	3.16964	7.58516	1.16234e-06	1.97266e-05	5.77734	ENSRNOG00000008301	Tagln2	transgelin 2 [Source:RGD Symbol;Acc:1310840]
0.650263	3.76823	7.5854	1.16188e-06	1.97266e-05	5.626	ENSRNOG00000046264	Pcdhb7	protocadherin beta 7 [Source:RGD Symbol;Acc:1309422]
-0.769858	4.39215	-7.58319	1.16616e-06	1.97602e-05	5.48396	ENSRNOG00000026085	Rabl3	RAB, member of RAS oncogene family-like 3 [Source:RGD Symbol;Acc:1306436]
-0.84225	3.24112	-7.579	1.17431e-06	1.9867e-05	5.64275	ENSRNOG00000047848	Cbr1l1	carbonyl reductase 1 like 1 [Source:RGD Symbol;Acc:2286]
-0.379637	8.16422	-7.57544	1.18129e-06	1.99536e-05	5.23665	ENSRNOG00000007241	Fnbp4	formin binding protein 4 [Source:RGD Symbol;Acc:1309238]
-0.466663	8.15524	-7.56299	1.20605e-06	2.03397e-05	5.21513	ENSRNOG00000007542	Scg5	secretogranin V [Source:RGD Symbol;Acc:3669]
-0.402782	5.10043	-7.55771	1.21671e-06	2.04874e-05	5.35464	ENSRNOG00000021330	Sprtn	SprT-like N-terminal domain [Source:RGD Symbol;Acc:1559496]
-1.18461	5.60546	-7.54826	1.23604e-06	2.07801e-05	5.25269	ENSRNOG00000033729	LOC102556967	zinc finger protein 484-like [Source:RGD Symbol;Acc:7510716]
-0.439737	4.90481	-7.54427	1.2443e-06	2.08863e-05	5.35251	ENSRNOG00000019760	Oxnad1	oxidoreductase NAD-binding domain containing 1 [Source:RGD Symbol;Acc:1311534]
-1.69877	2.6377	-7.54186	1.24932e-06	2.09379e-05	5.70116	ENSRNOG00000019100	Kif2c	kinesin family member 2C [Source:RGD Symbol;Acc:620239]
-0.508711	6.70369	-7.53979	1.25365e-06	2.09775e-05	5.18132	ENSRNOG00000022745	RGD1306502	RIKEN cDNA 6030458C11 gene [Source:MGI Symbol;Acc:MGI:1925127]
-0.864666	6.74305	-7.53705	1.25939e-06	2.10409e-05	5.17149	ENSRNOG00000007127	Bbs5	Bardet-Biedl syndrome 5 [Source:RGD Symbol;Acc:1310718]
-0.531727	3.20857	-7.52991	1.27449e-06	2.1194e-05	5.58054	ENSRNOG00000005433	Shq1	SHQ1, H/ACA ribonucleoprotein assembly factor [Source:RGD Symbol;Acc:1310610]
-0.574216	5.22811	-7.53029	1.27369e-06	2.1194e-05	5.29047	ENSRNOG00000006976	Med6	mediator complex subunit 6 [Source:RGD Symbol;Acc:1310296]
-1.06625	2.3913	-7.53011	1.27407e-06	2.1194e-05	5.68871	ENSRNOG00000031494	Armh1	armadillo-like helical domain containing 1 [Source:RGD Symbol;Acc:1563714]
-0.604061	6.36721	-7.52743	1.2798e-06	2.12494e-05	5.17594	ENSRNOG00000053428	Ccpg1	cell cycle progression 1 [Source:RGD Symbol;Acc:1311261]
0.377218	6.57027	7.52266	1.29003e-06	2.13862e-05	5.17859	ENSRNOG00000006818	Arl6ip5	ADP-ribosylation factor like GTPase 6 interacting protein 5 [Source:RGD Symbol;Acc:708572]
-0.634026	8.8179	-7.51851	1.29902e-06	2.1502e-05	5.14695	ENSRNOG00000012760	Chtop	chromatin target of PRMT1 [Source:RGD Symbol;Acc:1359407]
0.965369	4.71428	7.51697	1.30237e-06	2.15242e-05	5.39474	ENSRNOG00000012062	Npc2	NPC intracellular cholesterol transporter 2 [Source:RGD Symbol;Acc:628756]
0.547497	4.58991	7.51538	1.30583e-06	2.15481e-05	5.39324	ENSRNOG00000006388	Pygl	glycogen phosphorylase L [Source:RGD Symbol;Acc:620687]
0.471649	5.56874	7.51225	1.31268e-06	2.1628e-05	5.25068	ENSRNOG00000003453	Lypd1	Ly6/Plaur domain containing 1 [Source:RGD Symbol;Acc:1549754]
-0.976545	4.26636	-7.51129	1.3148e-06	2.16296e-05	5.40133	ENSRNOG00000014869	Wdr31	WD repeat domain 31 [Source:RGD Symbol;Acc:1309367]
0.536693	4.40841	7.50716	1.32392e-06	2.17464e-05	5.39158	ENSRNOG00000033261	Fam107a	family with sequence similarity 107, member A [Source:RGD Symbol;Acc:1306327]
0.68384	5.66967	7.50127	1.33703e-06	2.19282e-05	5.23168	ENSRNOG00000034126	NA	NA
0.65854	4.55871	7.49334	1.35492e-06	2.21538e-05	5.37371	ENSRNOG00000026842	Nnt	nicotinamide nucleotide transhydrogenase [Source:RGD Symbol;Acc:1587346]
-0.748715	6.39491	-7.4935	1.35456e-06	2.21538e-05	5.1082	ENSRNOG00000008767	Atg4c	autophagy related 4C, cysteine peptidase [Source:RGD Symbol;Acc:1598323]
1.44184	2.89352	7.48619	1.37125e-06	2.23763e-05	5.61631	ENSRNOG00000009227	Aplnr	apelin receptor [Source:RGD Symbol;Acc:621645]
-0.408954	6.26987	-7.48556	1.3727e-06	2.23763e-05	5.10551	ENSRNOG00000032700	Zbtb34	zinc finger and BTB domain containing 34 [Source:RGD Symbol;Acc:1596130]
0.702315	4.91855	7.45118	1.45428e-06	2.36701e-05	5.2459	ENSRNOG00000008001	Rab3b	RAB3B, member RAS oncogene family [Source:RGD Symbol;Acc:620922]
0.41026	6.24309	7.4489	1.45985e-06	2.37249e-05	5.07712	ENSRNOG00000045779	Rtl5	retrotransposon Gag like 5 [Source:RGD Symbol;Acc:6490575]
1.19522	2.06585	7.4324	1.50096e-06	2.43454e-05	5.442	ENSRNOG00000021787	Zfp217	zinc finger protein 217 [Source:RGD Symbol;Acc:1308451]
0.816725	2.81318	7.43176	1.50258e-06	2.43454e-05	5.52666	ENSRNOG00000014171	Tnfsf13	TNF superfamily member 13 [Source:RGD Symbol;Acc:1305871]
-0.367122	7.60438	-7.42107	1.52989e-06	2.47505e-05	4.96654	ENSRNOG00000010881	Trak2	trafficking kinesin protein 2 [Source:RGD Symbol;Acc:620915]
-0.698476	3.62346	-7.41666	1.54128e-06	2.48973e-05	5.34407	ENSRNOG00000022155	C4h3orf20	similar to human chromosome 3 open reading frame 20 [Source:RGD Symbol;Acc:1560289]
1.30451	4.49514	7.40899	1.56137e-06	2.5146e-05	5.24428	ENSRNOG00000017307	Prss23	serine protease 23 [Source:RGD Symbol;Acc:1359545]
0.432214	6.41902	7.40913	1.561e-06	2.5146e-05	4.98477	ENSRNOG00000002626	Car10	carbonic anhydrase 10 [Source:RGD Symbol;Acc:2322930]
0.361198	6.0316	7.4016	1.58094e-06	2.54105e-05	5.01565	ENSRNOG00000055401	Kcnc1	potassium voltage-gated channel subfamily C member 1 [Source:RGD Symbol;Acc:2955]
-0.394851	5.94658	-7.40101	1.58253e-06	2.54105e-05	4.98674	ENSRNOG00000024027	Lemd3	LEM domain containing 3 [Source:RGD Symbol;Acc:1596822]
-0.299056	10.9175	-7.39566	1.59689e-06	2.56027e-05	4.98647	ENSRNOG00000051170	Ddx17	DEAD-box helicase 17 [Source:RGD Symbol;Acc:1304945]
1.09535	2.60819	7.39406	1.6012e-06	2.56336e-05	5.46783	ENSRNOG00000021966	Il17rd	interleukin 17 receptor D [Source:RGD Symbol;Acc:1565237]
0.806466	5.50014	7.3911	1.60921e-06	2.57234e-05	5.03679	ENSRNOG00000024620	Mamdc2	MAM domain containing 2 [Source:RGD Symbol;Acc:1305129]
0.575011	5.70983	7.38489	1.62619e-06	2.59562e-05	5.02958	ENSRNOG00000020451	Cd81	Cd81 molecule [Source:RGD Symbol;Acc:2315]
-1.05697	7.22861	-7.38143	1.63574e-06	2.60697e-05	4.91368	ENSRNOG00000022044	Cabp4	calcium binding protein 4 [Source:RGD Symbol;Acc:1306083]
0.782462	3.91141	7.38046	1.63842e-06	2.60738e-05	5.29878	ENSRNOG00000008332	Smo	smoothened, frizzled class receptor [Source:RGD Symbol;Acc:3726]
0.690252	6.32534	7.37764	1.64625e-06	2.61596e-05	4.93902	ENSRNOG00000019556	Cd9	CD9 molecule [Source:RGD Symbol;Acc:2318]
0.466433	4.85485	7.37528	1.65282e-06	2.62251e-05	5.10486	ENSRNOG00000015072	Ptgr1	prostaglandin reductase 1 [Source:RGD Symbol;Acc:621195]
-0.909315	6.3975	-7.37329	1.65841e-06	2.6275e-05	4.89788	ENSRNOG00000008641	Gnpnat1	glucosamine-phosphate N-acetyltransferase 1 [Source:RGD Symbol;Acc:1563144]
-1.02976	4.76651	-7.37052	1.66619e-06	2.63592e-05	5.03438	ENSRNOG00000060486	Ptges3l1	prostaglandin E synthase 3-like 1 [Source:RGD Symbol;Acc:1359350]
-1.36729	3.23359	-7.36701	1.67612e-06	2.64773e-05	5.25875	ENSRNOG00000056434	Scarna18b	small Cajal body-specific RNA 18B [Source:RGD Symbol;Acc:41216273]
0.921032	4.47748	7.36567	1.67993e-06	2.64984e-05	5.21146	ENSRNOG00000020060	Atf5	activating transcription factor 5 [Source:RGD Symbol;Acc:628902]
-0.443688	7.28036	-7.36297	1.68761e-06	2.65805e-05	4.86501	ENSRNOG00000019768	Ncoa4	nuclear receptor coactivator 4 [Source:RGD Symbol;Acc:1563014]
-0.354932	5.82395	-7.35915	1.69857e-06	2.67138e-05	4.93326	ENSRNOG00000061795	Rbm4b	RNA binding motif protein 4B [Source:RGD Symbol;Acc:1359343]
-0.565829	7.48052	-7.35426	1.7127e-06	2.68966e-05	4.84853	ENSRNOG00000008156	Tgs1	trimethylguanosine synthase 1 [Source:RGD Symbol;Acc:1309953]
0.649351	4.83186	7.34279	1.74634e-06	2.73432e-05	5.07472	ENSRNOG00000019246	Psme2	proteasome activator subunit 2 [Source:RGD Symbol;Acc:3430]
-0.406534	7.12298	-7.34196	1.74878e-06	2.73432e-05	4.82973	ENSRNOG00000045752	Rrm1	ribonucleotide reductase catalytic subunit M1 [Source:RGD Symbol;Acc:1592569]
-0.87345	5.29031	-7.34198	1.74872e-06	2.73432e-05	4.97312	ENSRNOG00000007637	Acer2	alkaline ceramidase 2 [Source:RGD Symbol;Acc:1304629]
-0.3533	8.29854	-7.34064	1.7527e-06	2.73645e-05	4.82984	ENSRNOG00000014436	Ppip5k1	diphosphoinositol pentakisphosphate kinase 1 [Source:RGD Symbol;Acc:1311552]
1.77471	2.7212	7.33651	1.76502e-06	2.75168e-05	5.33552	ENSRNOG00000027839	Ptk2b	protein tyrosine kinase 2 beta [Source:RGD Symbol;Acc:628758]
0.625517	5.70792	7.33376	1.77329e-06	2.75728e-05	4.91154	ENSRNOG00000021938	Lrrtm4	leucine rich repeat transmembrane neuronal 4 [Source:RGD Symbol;Acc:1560707]
0.539511	5.88792	7.3336	1.77375e-06	2.75728e-05	4.88447	ENSRNOG00000001964	Cd47	Cd47 molecule [Source:RGD Symbol;Acc:2308]
-0.498515	5.09178	-7.32593	1.797e-06	2.78938e-05	4.95219	ENSRNOG00000027145	Rora	RAR-related orphan receptor A [Source:RGD Symbol;Acc:1308419]
-0.795001	7.66601	-7.32025	1.81442e-06	2.81235e-05	4.78938	ENSRNOG00000024967	Uqcrb	ubiquinol-cytochrome c reductase binding protein [Source:RGD Symbol;Acc:1311971]
1.48877	3.57177	7.31693	1.82468e-06	2.8201e-05	5.29518	ENSRNOG00000012988	Lix1	limb and CNS expressed 1 [Source:RGD Symbol;Acc:1309454]
0.487112	5.8343	7.31729	1.82357e-06	2.8201e-05	4.8705	ENSRNOG00000020388	Inpp5f	inositol polyphosphate-5-phosphatase F [Source:RGD Symbol;Acc:1305777]
0.664693	3.68246	7.31557	1.82889e-06	2.82254e-05	5.16277	ENSRNOG00000018865	Adamts12	ADAM metallopeptidase with thrombospondin type 1 motif, 12 [Source:RGD Symbol;Acc:1307323]
-0.94287	3.23097	-7.31403	1.83369e-06	2.82589e-05	5.16707	ENSRNOG00000004534	Spdya	speedy/RINGO cell cycle regulator family member A [Source:RGD Symbol;Acc:621730]
-0.361876	6.28909	-7.30916	1.84895e-06	2.84532e-05	4.80411	ENSRNOG00000015250	Mettl14	methyltransferase 14, N6-adenosine-methyltransferase subunit [Source:RGD Symbol;Acc:1304822]
-0.548793	3.97921	-7.30189	1.87193e-06	2.87655e-05	5.08589	ENSRNOG00000039024	Spice1	spindle and centriole associated protein 1 [Source:RGD Symbol;Acc:1310729]
-0.380628	5.34026	-7.29998	1.87804e-06	2.88182e-05	4.87659	ENSRNOG00000024563	Ganc	glucosidase, alpha; neutral C [Source:RGD Symbol;Acc:2660]
-0.623218	6.17988	-7.2983	1.88342e-06	2.88594e-05	4.78122	ENSRNOG00000017712	Cartpt	CART prepropeptide [Source:RGD Symbol;Acc:2272]
0.809143	4.47621	7.29741	1.88625e-06	2.88613e-05	5.0852	ENSRNOG00000016358	Apba2	amyloid beta precursor protein binding family A member 2 [Source:RGD Symbol;Acc:620845]
-0.747314	4.47064	-7.29658	1.88893e-06	2.88613e-05	4.96388	ENSRNOG00000006921	Rbl1	RB transcriptional corepressor like 1 [Source:RGD Symbol;Acc:1595511]
-0.763016	4.09615	-7.29246	1.90223e-06	2.90232e-05	5.06106	ENSRNOG00000008459	Anapc13	anaphase promoting complex subunit 13 [Source:RGD Symbol;Acc:1583270]
-0.460159	5.14256	-7.28252	1.9347e-06	2.94767e-05	4.86048	ENSRNOG00000023431	LOC102555635	zinc finger protein 39-like [Source:RGD Symbol;Acc:7511312]
-0.417885	5.48473	-7.28022	1.9423e-06	2.95086e-05	4.82098	ENSRNOG00000007853	Prdm10	PR/SET domain 10 [Source:RGD Symbol;Acc:1560384]
-1.00339	7.18196	-7.28049	1.9414e-06	2.95086e-05	4.74399	ENSRNOG00000001194	Rrp1b	ribosomal RNA processing 1B [Source:RGD Symbol;Acc:1305633]
0.957255	4.36043	7.27528	1.95871e-06	2.97158e-05	5.00385	ENSRNOG00000002305	Slc15a2	solute carrier family 15 member 2 [Source:RGD Symbol;Acc:61972]
1.32075	3.86768	7.27197	1.96979e-06	2.98417e-05	5.07062	ENSRNOG00000061379	C7	complement C7 [Source:RGD Symbol;Acc:620318]
0.340739	6.88594	7.26652	1.9882e-06	3.00781e-05	4.71562	ENSRNOG00000003694	Prox1	prospero homeobox 1 [Source:RGD Symbol;Acc:1306890]
-0.661819	4.25378	-7.25928	2.01291e-06	3.0409e-05	4.93458	ENSRNOG00000047019	Bbip1	BBSome interacting protein 1 [Source:RGD Symbol;Acc:6498801]
0.668522	3.85124	7.25057	2.04306e-06	3.08211e-05	5.05025	ENSRNOG00000015461	Serpine2	serpin family E member 2 [Source:RGD Symbol;Acc:3748]
-0.402001	5.39243	-7.249	2.04853e-06	3.08603e-05	4.77465	ENSRNOG00000008297	Oser1	oxidative stress responsive serine-rich 1 [Source:RGD Symbol;Acc:1303142]
0.656188	6.35295	7.24505	2.0624e-06	3.1e-05	4.71293	ENSRNOG00000007290	Atp1a2	ATPase Na+/K+ transporting subunit alpha 2 [Source:RGD Symbol;Acc:2168]
0.612855	3.65459	7.24472	2.06358e-06	3.1e-05	5.05298	ENSRNOG00000015118	Cpped1	calcineurin-like phosphoesterase domain containing 1 [Source:RGD Symbol;Acc:1306568]
0.378565	6.77934	7.24145	2.07512e-06	3.11298e-05	4.67306	ENSRNOG00000007104	Itpr1	inositol 1,4,5-trisphosphate receptor, type 1 [Source:RGD Symbol;Acc:2933]
-0.512704	4.46824	-7.23928	2.08284e-06	3.12019e-05	4.91201	ENSRNOG00000007333	Wdr20	WD repeat domain 20 [Source:RGD Symbol;Acc:1306499]
-0.449531	4.92784	-7.23036	2.11486e-06	3.16374e-05	4.81704	ENSRNOG00000026783	Smyd4	SET and MYND domain containing 4 [Source:RGD Symbol;Acc:1307369]
0.874227	3.73759	7.22053	2.15073e-06	3.21223e-05	5.04576	ENSRNOG00000027299	NA	NA
-0.311359	6.85532	-7.21985	2.15326e-06	3.21223e-05	4.62152	ENSRNOG00000056944	Arhgap24	Rho GTPase activating protein 24 [Source:RGD Symbol;Acc:1306669]
1.30066	3.51062	7.21852	2.15817e-06	3.21409e-05	5.1282	ENSRNOG00000046414	NA	NA
-0.69874	2.91356	-7.21788	2.16051e-06	3.21409e-05	5.08327	ENSRNOG00000006661	Rad51c	RAD51 paralog C [Source:RGD Symbol;Acc:1563765]
-0.940495	5.09806	-7.21684	2.16438e-06	3.2154e-05	4.73532	ENSRNOG00000058663	Suz12	SUZ12 polycomb repressive complex 2 subunit [Source:RGD Symbol;Acc:1593621]
-0.755403	7.55623	-7.21234	2.18113e-06	3.23579e-05	4.60519	ENSRNOG00000016635	Katnip	katanin interacting protein [Source:RGD Symbol;Acc:1595846]
4.3175	2.03448	7.20704	2.20102e-06	3.26079e-05	3.95418	ENSRNOG00000010645	Lgals3	galectin 3 [Source:RGD Symbol;Acc:69356]
0.747659	3.75441	7.20414	2.21198e-06	3.268e-05	5.03189	ENSRNOG00000019316	Sh3bp4	SH3-domain binding protein 4 [Source:RGD Symbol;Acc:620219]
-0.461251	7.62976	-7.20475	2.20967e-06	3.268e-05	4.58509	ENSRNOG00000050321	Zzz3	zinc finger, ZZ-type containing 3 [Source:RGD Symbol;Acc:1565468]
-0.406272	7.09007	-7.19825	2.23444e-06	3.29664e-05	4.57772	ENSRNOG00000000340	Rtraf	RNA transcription, translation and transport factor [Source:RGD Symbol;Acc:1304704]
-0.494988	7.23273	-7.1958	2.24385e-06	3.30598e-05	4.56887	ENSRNOG00000013356	Snapin	SNAP-associated protein [Source:RGD Symbol;Acc:1560377]
0.70135	3.75039	7.19116	2.26176e-06	3.3278e-05	4.95382	ENSRNOG00000013265	Tgfbr2	transforming growth factor, beta receptor 2 [Source:RGD Symbol;Acc:69651]
-0.404073	4.8873	-7.1869	2.27836e-06	3.34762e-05	4.72458	ENSRNOG00000010659	Gabpb1	GA binding protein transcription factor subunit beta 1 [Source:RGD Symbol;Acc:1560391]
-0.652859	6.57645	-7.18502	2.28574e-06	3.35387e-05	4.56339	ENSRNOG00000012698	Chsy1	chondroitin sulfate synthase 1 [Source:RGD Symbol;Acc:1311904]
-0.387644	6.76776	-7.18414	2.28918e-06	3.35434e-05	4.56814	ENSRNOG00000016011	Plekhg1	pleckstrin homology and RhoGEF domain containing G1 [Source:RGD Symbol;Acc:1583676]
-0.356034	9.32726	-7.18125	2.30059e-06	3.36187e-05	4.56406	ENSRNOG00000050585	Pgam1	phosphoglycerate mutase 1 [Source:RGD Symbol;Acc:3312]
-0.435744	6.49244	-7.18195	2.29781e-06	3.36187e-05	4.57252	ENSRNOG00000011059	Ttbk2	tau tubulin kinase 2 [Source:RGD Symbol;Acc:1311661]
-0.621496	6.24218	-7.17718	2.31673e-06	3.38084e-05	4.5699	ENSRNOG00000033351	Zfp869	zinc finger protein 869 [Source:RGD Symbol;Acc:2320746]
0.872439	5.70959	7.17465	2.32682e-06	3.38635e-05	4.62344	ENSRNOG00000011861	Aadat	aminoadipate aminotransferase [Source:RGD Symbol;Acc:2948]
-0.59392	2.93288	-7.17542	2.32372e-06	3.38635e-05	5.01216	ENSRNOG00000033433	Csrnp1	cysteine and serine rich nuclear protein 1 [Source:RGD Symbol;Acc:1305999]
2.20557	1.84891	7.16539	2.36415e-06	3.43603e-05	4.84628	ENSRNOG00000010266	Cd180	CD180 molecule [Source:RGD Symbol;Acc:1308170]
0.487164	9.04213	7.16155	2.37981e-06	3.45141e-05	4.52346	ENSRNOG00000011739	Dennd4a	DENN domain containing 4A [Source:RGD Symbol;Acc:1562639]
0.35276	5.38272	7.16122	2.38117e-06	3.45141e-05	4.6479	ENSRNOG00000008806	Clip4	CAP-GLY domain containing linker protein family, member 4 [Source:RGD Symbol;Acc:1311049]
0.890991	5.02226	7.16009	2.3858e-06	3.45346e-05	4.69251	ENSRNOG00000015088	Prune2	prune homolog 2 with BCH domain [Source:RGD Symbol;Acc:1311350]
-0.606598	8.15982	-7.15847	2.39245e-06	3.45841e-05	4.50794	ENSRNOG00000019913	Mta2	metastasis associated 1 family, member 2 [Source:RGD Symbol;Acc:1306743]
0.468702	5.20746	7.15486	2.40733e-06	3.47057e-05	4.664	ENSRNOG00000015321	Moxd1	monooxygenase, DBH-like 1 [Source:RGD Symbol;Acc:1310033]
-1.47381	1.27999	-7.15539	2.40517e-06	3.47057e-05	5.01999	ENSRNOG00000016987	Pstpip2	proline-serine-threonine phosphatase-interacting protein 2 [Source:RGD Symbol;Acc:1563090]
0.34939	6.22291	7.15077	2.42435e-06	3.49041e-05	4.5481	ENSRNOG00000012333	Kbtbd11	kelch repeat and BTB domain containing 11 [Source:RGD Symbol;Acc:1563576]
-2.37169	1.3485	-7.14636	2.44285e-06	3.51233e-05	4.60166	ENSRNOG00000022331	Ccdc78	coiled-coil domain containing 78 [Source:RGD Symbol;Acc:1560244]
-0.394282	8.65557	-7.14243	2.45943e-06	3.53144e-05	4.48368	ENSRNOG00000014836	Ralgapb	Ral GTPase activating protein non-catalytic subunit beta [Source:RGD Symbol;Acc:1306861]
-0.331399	6.52463	-7.13573	2.48799e-06	3.56768e-05	4.4913	ENSRNOG00000001629	Get1	guided entry of tail-anchored proteins factor 1 [Source:RGD Symbol;Acc:735104]
0.86414	4.78137	7.12324	2.54213e-06	3.64044e-05	4.71742	ENSRNOG00000001235	Gna12	G protein subunit alpha 12 [Source:RGD Symbol;Acc:71018]
0.798318	3.22679	7.11808	2.56488e-06	3.65836e-05	4.91846	ENSRNOG00000032208	Eda	ectodysplasin-A [Source:RGD Symbol;Acc:1563178]
0.405798	6.35584	7.11809	2.56482e-06	3.65836e-05	4.47351	ENSRNOG00000023197	Zfp608	zinc finger protein 608 [Source:RGD Symbol;Acc:1306824]
-0.740618	4.14609	-7.11833	2.56377e-06	3.65836e-05	4.69841	ENSRNOG00000012980	Hyls1	HYLS1, centriolar and ciliogenesis associated [Source:RGD Symbol;Acc:1594169]
0.472737	6.15906	7.11593	2.57438e-06	3.66704e-05	4.5121	ENSRNOG00000030547	Dpp6	dipeptidyl peptidase like 6 [Source:RGD Symbol;Acc:68402]
3.19944	1.29983	7.10682	2.6152e-06	3.70831e-05	3.88827	ENSRNOG00000048222	Nlrc5	NLR family, CARD domain containing 5 [Source:RGD Symbol;Acc:1309166]
1.33495	4.12343	7.10605	2.61872e-06	3.70831e-05	4.8265	ENSRNOG00000011599	Gldc	glycine decarboxylase [Source:RGD Symbol;Acc:1308660]
0.81107	3.53904	7.10741	2.61256e-06	3.70831e-05	4.83204	ENSRNOG00000012508	Slc39a8	solute carrier family 39 member 8 [Source:RGD Symbol;Acc:1308236]
-0.341282	6.81797	-7.10562	2.62064e-06	3.70831e-05	4.42647	ENSRNOG00000027300	Ttc7b	tetratricopeptide repeat domain 7B [Source:RGD Symbol;Acc:1305920]
-1.14649	5.57633	-7.10681	2.61524e-06	3.70831e-05	4.47668	ENSRNOG00000018987	Crebzf	CREB/ATF bZIP transcription factor [Source:RGD Symbol;Acc:1565584]
-0.563097	7.34902	-7.10449	2.62575e-06	3.71064e-05	4.40777	ENSRNOG00000005196	Slc12a6	solute carrier family 12, member 6 [Source:RGD Symbol;Acc:1311335]
0.90232	3.10433	7.10037	2.64451e-06	3.73223e-05	4.9182	ENSRNOG00000013944	Zc3hav1l	zinc finger CCCH-type containing, antiviral 1 like [Source:RGD Symbol;Acc:1309236]
0.468672	9.79243	7.0996	2.64803e-06	3.7323e-05	4.42802	ENSRNOG00000019834	Hsp90ab1	heat shock protein 90 alpha family class B member 1 [Source:RGD Symbol;Acc:1303075]
6.2366	-0.588951	7.08285	2.72588e-06	3.83195e-05	-0.284547	ENSRNOG00000017412	AABR07001512.1	None
-0.702948	5.28748	-7.0829	2.72564e-06	3.83195e-05	4.52297	ENSRNOG00000028448	Elovl1	ELOVL fatty acid elongase 1 [Source:RGD Symbol;Acc:1587151]
-0.711718	6.6126	-7.0748	2.7641e-06	3.88059e-05	4.36287	ENSRNOG00000030237	Cox7c	cytochrome c oxidase subunit 7C [Source:RGD Symbol;Acc:2300145]
0.699601	4.9178	7.07188	2.77815e-06	3.89522e-05	4.60486	ENSRNOG00000045816	Gria1	glutamate ionotropic receptor AMPA type subunit 1 [Source:RGD Symbol;Acc:621531]
-0.381018	5.36141	-7.06591	2.80701e-06	3.92845e-05	4.45605	ENSRNOG00000007984	Amer1	APC membrane recruitment protein 1 [Source:RGD Symbol;Acc:1560322]
-0.46698	6.40708	-7.06546	2.80918e-06	3.92845e-05	4.35889	ENSRNOG00000011513	Gla	galactosidase, alpha [Source:RGD Symbol;Acc:1589721]
-2.15788	3.02885	-7.06461	2.81334e-06	3.92915e-05	4.76764	ENSRNOG00000009582	Rpe65	retinoid isomerohydrolase RPE65 [Source:RGD Symbol;Acc:621396]
-0.516225	5.01802	-7.06221	2.82505e-06	3.94037e-05	4.48417	ENSRNOG00000001489	Tbp	TATA box binding protein [Source:RGD Symbol;Acc:67398]
0.494357	6.38025	7.05596	2.85582e-06	3.97813e-05	4.37205	ENSRNOG00000012802	Tenm3	teneurin transmembrane protein 3 [Source:RGD Symbol;Acc:1306641]
1.28868	5.49338	7.04949	2.88808e-06	4.01784e-05	4.53987	ENSRNOG00000057125	Ddr1	discoidin domain receptor tyrosine kinase 1 [Source:RGD Symbol;Acc:2252]
0.373021	5.91082	7.04802	2.89542e-06	4.02284e-05	4.39331	ENSRNOG00000014975	Zfp483	zinc finger protein 483 [Source:RGD Symbol;Acc:727958]
-0.666962	5.98462	-7.04605	2.90534e-06	4.03139e-05	4.34103	ENSRNOG00000012343	Pdp2	pyruvate dehydrogenase phosphatase catalytic subunit 2 [Source:RGD Symbol;Acc:628812]
3.10193	3.56631	7.04377	2.91686e-06	4.04215e-05	4.85955	ENSRNOG00000000443	NA	NA
0.734644	4.91578	7.04298	2.92088e-06	4.0425e-05	4.54711	ENSRNOG00000025394	Tanc1	tetratricopeptide repeat, ankyrin repeat and coiled-coil containing 1 [Source:RGD Symbol;Acc:1302949]
0.521835	3.60391	7.03846	2.94389e-06	4.05489e-05	4.71298	ENSRNOG00000012292	Alg8	ALG8, alpha-1,3-glucosyltransferase [Source:RGD Symbol;Acc:1305468]
-0.571942	9.45064	-7.03834	2.94451e-06	4.05489e-05	4.31306	ENSRNOG00000019848	Rbm39	RNA binding motif protein 39 [Source:RGD Symbol;Acc:1310071]
-0.58137	4.36301	-7.03825	2.94495e-06	4.05489e-05	4.53639	ENSRNOG00000023035	Smim8	small integral membrane protein 8 [Source:RGD Symbol;Acc:1305158]
-0.625246	8.35724	-7.03958	2.93815e-06	4.05489e-05	4.29636	ENSRNOG00000009819	Vezf1	vascular endothelial zinc finger 1 [Source:RGD Symbol;Acc:1308058]
-0.702228	8.26643	-7.03294	2.97228e-06	4.08726e-05	4.28367	ENSRNOG00000019273	Capn7	calpain 7 [Source:RGD Symbol;Acc:1304855]
0.534269	4.79553	7.02878	2.99383e-06	4.10462e-05	4.53015	ENSRNOG00000012815	Chst10	carbohydrate sulfotransferase 10 [Source:RGD Symbol;Acc:621216]
0.473331	4.93712	7.02766	2.99964e-06	4.10462e-05	4.47312	ENSRNOG00000011517	Tnfrsf21	TNF receptor superfamily member 21 [Source:RGD Symbol;Acc:1307308]
-0.533078	5.34815	-7.02755	3.00021e-06	4.10462e-05	4.38462	ENSRNOG00000012692	Riok2	RIO kinase 2 [Source:RGD Symbol;Acc:1311588]
-0.829241	9.2622	-7.02772	2.99934e-06	4.10462e-05	4.29104	ENSRNOG00000012790	Lrit1	leucine-rich repeat, Ig-like and transmembrane domains 1 [Source:RGD Symbol;Acc:628607]
-0.728542	3.87774	-7.02506	3.01323e-06	4.11719e-05	4.60001	ENSRNOG00000059276	LOC498265	cDNA sequence BC055324 [Source:MGI Symbol;Acc:MGI:3590554]
1.60557	3.91634	7.02317	3.02316e-06	4.1255e-05	4.66705	ENSRNOG00000023334	Parp14	poly (ADP-ribose) polymerase family, member 14 [Source:RGD Symbol;Acc:1310490]
-0.310114	5.87656	-7.01603	3.0609e-06	4.1717e-05	4.31795	ENSRNOG00000013565	Zfp507	zinc finger protein 507 [Source:RGD Symbol;Acc:1307017]
0.471604	7.58454	7.01467	3.06815e-06	4.17627e-05	4.24796	ENSRNOG00000008479	Slc8a1	solute carrier family 8 member A1 [Source:RGD Symbol;Acc:3717]
0.546257	3.62443	7.01233	3.08072e-06	4.18806e-05	4.68998	ENSRNOG00000028207	Colgalt2	collagen beta(1-O)galactosyltransferase 2 [Source:RGD Symbol;Acc:1304702]
1.36501	2.59933	7.00518	3.11925e-06	4.23328e-05	4.82298	ENSRNOG00000013907	Sall1	spalt-like transcription factor 1 [Source:RGD Symbol;Acc:1309916]
0.970022	4.284	7.0047	3.12188e-06	4.23328e-05	4.52084	ENSRNOG00000003346	Fancb	FA complementation group B [Source:RGD Symbol;Acc:1561555]
-1.01117	7.02531	-7.00258	3.13339e-06	4.24353e-05	4.2256	ENSRNOG00000017882	Camk1d	calcium/calmodulin-dependent protein kinase ID [Source:RGD Symbol;Acc:1560691]
0.332812	7.14597	7.00098	3.14218e-06	4.25006e-05	4.23088	ENSRNOG00000022429	Minar2	membrane integral NOTCH2 associated receptor 2 [Source:RGD Symbol;Acc:1312005]
-0.282808	8.8277	-6.99509	3.17455e-06	4.28844e-05	4.22235	ENSRNOG00000020235	Hnrnpl	heterogeneous nuclear ribonucleoprotein L [Source:RGD Symbol;Acc:71059]
-0.639086	4.0204	-6.9891	3.20786e-06	4.32798e-05	4.5145	ENSRNOG00000015735	Zswim1	zinc finger, SWIM-type containing 1 [Source:RGD Symbol;Acc:1305715]
0.801412	5.13184	6.9881	3.21347e-06	4.33011e-05	4.35678	ENSRNOG00000006084	Cngb3	cyclic nucleotide gated channel subunit beta 3 [Source:RGD Symbol;Acc:1565364]
1.36219	5.42451	6.97371	3.29517e-06	4.43463e-05	4.32253	ENSRNOG00000059538	Clec2g	C-type lectin domain family 2, member G [Source:RGD Symbol;Acc:1563148]
-0.291865	5.55762	-6.97271	3.30089e-06	4.43677e-05	4.27247	ENSRNOG00000020110	B4gat1	beta-1,4-glucuronyltransferase 1 [Source:RGD Symbol;Acc:1309541]
1.42338	4.13799	6.96777	3.32952e-06	4.46406e-05	4.49243	ENSRNOG00000018517	Trim21	tripartite motif-containing 21 [Source:RGD Symbol;Acc:1305795]
1.14204	2.75412	6.96827	3.32658e-06	4.46406e-05	4.7389	ENSRNOG00000013309	Pik3ap1	phosphoinositide-3-kinase adaptor protein 1 [Source:RGD Symbol;Acc:1307744]
0.925137	2.62985	6.96359	3.35387e-06	4.48899e-05	4.74195	ENSRNOG00000018681	Nes	nestin [Source:RGD Symbol;Acc:3162]
0.579286	5.88702	6.96315	3.35649e-06	4.48899e-05	4.26549	ENSRNOG00000008364	Cat	catalase [Source:RGD Symbol;Acc:2279]
0.510028	6.57892	6.95881	3.38199e-06	4.51746e-05	4.19521	ENSRNOG00000055809	NA	NA
-0.653384	5.40636	-6.955	3.40462e-06	4.54203e-05	4.25201	ENSRNOG00000010090	Ccdc174	coiled-coil domain containing 174 [Source:RGD Symbol;Acc:1305225]
-0.48051	5.11948	-6.95194	3.42289e-06	4.55507e-05	4.28993	ENSRNOG00000015322	NA	NA
-0.672274	6.13438	-6.9521	3.42191e-06	4.55507e-05	4.16923	ENSRNOG00000009808	Ift80	intraflagellar transport 80 [Source:RGD Symbol;Acc:1312006]
0.525817	5.1256	6.94458	3.46722e-06	4.60835e-05	4.32671	ENSRNOG00000002092	Hunk	hormonally upregulated Neu-associated kinase [Source:RGD Symbol;Acc:1565091]
2.16082	2.59335	6.94284	3.47779e-06	4.61668e-05	4.65346	ENSRNOG00000004537	Rxrg	retinoid X receptor gamma [Source:RGD Symbol;Acc:620046]
-0.708408	2.89199	-6.93386	3.53286e-06	4.68399e-05	4.59145	ENSRNOG00000000588	Slc16a10	solute carrier family 16 member 10 [Source:RGD Symbol;Acc:69197]
-0.432099	5.72819	-6.93004	3.55656e-06	4.70958e-05	4.18323	ENSRNOG00000031671	Rasgef1a	RasGEF domain family, member 1A [Source:RGD Symbol;Acc:1305836]
-0.78646	6.79625	-6.92235	3.60478e-06	4.76755e-05	4.08318	ENSRNOG00000013253	Armc1	armadillo repeat containing 1 [Source:RGD Symbol;Acc:1560393]
-0.404545	6.07433	-6.90623	3.70815e-06	4.89823e-05	4.09953	ENSRNOG00000015796	Msh2	mutS homolog 2 [Source:RGD Symbol;Acc:620786]
0.83691	3.85151	6.90406	3.72228e-06	4.91084e-05	4.42894	ENSRNOG00000006472	Hspa2	heat shock protein family A (Hsp70) member 2 [Source:RGD Symbol;Acc:620664]
-1.30654	3.00889	-6.8992	3.75418e-06	4.94685e-05	4.48708	ENSRNOG00000003695	Mgat4d	MGAT4 family, member D [Source:RGD Symbol;Acc:1310572]
-0.272225	6.08814	-6.89567	3.77753e-06	4.97151e-05	4.08929	ENSRNOG00000019428	Higd1a	HIG1 hypoxia inducible domain family, member 1A [Source:RGD Symbol;Acc:620215]
-0.490676	9.36924	-6.89446	3.78552e-06	4.97592e-05	4.05086	ENSRNOG00000033765	Eif1	eukaryotic translation initiation factor 1 [Source:RGD Symbol;Acc:1306308]
0.635485	5.97688	6.89337	3.79282e-06	4.97941e-05	4.12398	ENSRNOG00000002050	Igfbp7	insulin-like growth factor binding protein 7 [Source:RGD Symbol;Acc:1306201]
0.673228	5.44399	6.89133	3.8064e-06	4.98504e-05	4.15979	ENSRNOG00000010358	Sh3rf1	SH3 domain containing ring finger 1 [Source:RGD Symbol;Acc:735154]
0.634911	4.70041	6.89142	3.80577e-06	4.98504e-05	4.30374	ENSRNOG00000029366	Prrt2	proline-rich transmembrane protein 2 [Source:RGD Symbol;Acc:1564195]
-0.520157	7.45551	-6.88692	3.83599e-06	5.01766e-05	4.01484	ENSRNOG00000000648	Jmjd1c	jumonji domain containing 1C [Source:RGD Symbol;Acc:708458]
1.40563	2.65038	6.88393	3.85621e-06	5.03184e-05	4.61216	ENSRNOG00000017311	Me3	malic enzyme 3 [Source:RGD Symbol;Acc:1311070]
-0.430092	5.70528	-6.8844	3.85303e-06	5.03184e-05	4.08513	ENSRNOG00000007678	Zfp263	zinc finger protein 263 [Source:RGD Symbol;Acc:1307301]
0.393464	6.4433	6.87913	3.88892e-06	5.05897e-05	4.03908	ENSRNOG00000007610	Gdf11	growth differentiation factor 11 [Source:RGD Symbol;Acc:2673]
-0.467571	7.52615	-6.87964	3.88538e-06	5.05897e-05	4.00379	ENSRNOG00000016306	Adgrv1	adhesion G protein-coupled receptor V1 [Source:RGD Symbol;Acc:1562101]
-0.711998	4.37175	-6.8788	3.89115e-06	5.05897e-05	4.2555	ENSRNOG00000020024	Taf7	TATA-box binding protein associated factor 7 [Source:RGD Symbol;Acc:1309935]
-0.35952	5.66865	-6.87398	3.92428e-06	5.09586e-05	4.06649	ENSRNOG00000013660	Cog6	component of oligomeric golgi complex 6 [Source:RGD Symbol;Acc:1303283]
-0.389567	6.56033	-6.8723	3.93588e-06	5.10255e-05	4.01662	ENSRNOG00000015913	Tspan5	tetraspanin 5 [Source:RGD Symbol;Acc:1303176]
-0.49383	8.05272	-6.87186	3.93894e-06	5.10255e-05	3.98999	ENSRNOG00000030232	Hacd3	3-hydroxyacyl-CoA dehydratase 3 [Source:RGD Symbol;Acc:1565496]
0.605191	6.17141	6.86185	4.00893e-06	5.18695e-05	4.02525	ENSRNOG00000007713	Tmcc3	transmembrane and coiled-coil domain family 3 [Source:RGD Symbol;Acc:1307241]
0.809293	5.52631	6.86026	4.02013e-06	5.19518e-05	4.14888	ENSRNOG00000015603	Prkce	protein kinase C, epsilon [Source:RGD Symbol;Acc:61925]
0.504306	4.10927	6.85718	4.04205e-06	5.21722e-05	4.30882	ENSRNOG00000057867	Mns1	meiosis-specific nuclear structural 1 [Source:RGD Symbol;Acc:1549718]
-0.426112	6.3882	-6.85181	4.08046e-06	5.25415e-05	3.98022	ENSRNOG00000005362	Rab3ip	RAB3A interacting protein [Source:RGD Symbol;Acc:620650]
-0.98049	5.46132	-6.85209	4.0784e-06	5.25415e-05	4.03075	ENSRNOG00000029370	Abhd3	abhydrolase domain containing 3, phospholipase [Source:RGD Symbol;Acc:1310655]
-0.880359	6.87113	-6.83919	4.1722e-06	5.36583e-05	3.93191	ENSRNOG00000001120	Med13l	mediator complex subunit 13L [Source:RGD Symbol;Acc:1305884]
-0.553735	7.50121	-6.83563	4.19849e-06	5.39317e-05	3.92099	ENSRNOG00000005884	Emc7	ER membrane protein complex subunit 7 [Source:RGD Symbol;Acc:1305045]
2.12452	2.58009	6.83413	4.20965e-06	5.39929e-05	4.50881	ENSRNOG00000000853	Aif1	allograft inflammatory factor 1 [Source:RGD Symbol;Acc:61924]
-0.880154	5.99421	-6.83363	4.21332e-06	5.39929e-05	3.95263	ENSRNOG00000010760	E2f5	E2F transcription factor 5 [Source:RGD Symbol;Acc:621357]
2.41877	0.84186	6.83212	4.22458e-06	5.40412e-05	3.33683	ENSRNOG00000020679	Icam1	intercellular adhesion molecule 1 [Source:RGD Symbol;Acc:2857]
0.564344	4.97189	6.83161	4.22842e-06	5.40412e-05	4.14345	ENSRNOG00000001255	Mlxip	MLX interacting protein [Source:RGD Symbol;Acc:1560774]
0.330711	4.61556	6.8311	4.2322e-06	5.40412e-05	4.17094	ENSRNOG00000005124	Plekhh2	pleckstrin homology, MyTH4 and FERM domain containing H2 [Source:RGD Symbol;Acc:1304935]
-0.598333	6.34243	-6.82837	4.25261e-06	5.42372e-05	3.93029	ENSRNOG00000016034	Cnot9	CCR4-NOT transcription complex subunit 9 [Source:RGD Symbol;Acc:1311495]
0.362273	5.137	6.82016	4.31474e-06	5.48991e-05	4.0705	ENSRNOG00000012826	Creb3l2	cAMP responsive element binding protein 3-like 2 [Source:RGD Symbol;Acc:1306040]
-0.384632	6.93679	-6.82025	4.31404e-06	5.48991e-05	3.89791	ENSRNOG00000001773	Senp2	SUMO specific peptidase 2 [Source:RGD Symbol;Acc:708378]
-0.651785	5.70796	-6.81886	4.32468e-06	5.49603e-05	3.96573	ENSRNOG00000017619	Aldh1a1	aldehyde dehydrogenase 1 family, member A1 [Source:RGD Symbol;Acc:2087]
-0.703497	3.14288	-6.81637	4.3437e-06	5.51367e-05	4.39023	ENSRNOG00000017548	Fam53a	family with sequence similarity 53, member A [Source:RGD Symbol;Acc:1563315]
0.406651	6.15386	6.8093	4.3983e-06	5.57638e-05	3.94681	ENSRNOG00000058739	Snn	stannin [Source:RGD Symbol;Acc:3730]
-0.712853	4.14198	-6.80863	4.40356e-06	5.57646e-05	4.15147	ENSRNOG00000021272	Mcm8	minichromosome maintenance 8 homologous recombination repair factor [Source:RGD Symbol;Acc:1305218]
0.450533	4.83153	6.80469	4.43433e-06	5.60881e-05	4.07863	ENSRNOG00000001204	Ankrd13a	ankyrin repeat domain 13a [Source:RGD Symbol;Acc:1308577]
-0.455748	5.30949	-6.80084	4.46464e-06	5.64049e-05	3.97831	ENSRNOG00000027278	Pramef8	PRAME family member 8 [Source:RGD Symbol;Acc:1564061]
0.35312	5.77432	6.79898	4.47934e-06	5.6524e-05	3.9503	ENSRNOG00000043103	Frrs1l	ferric-chelate reductase 1-like [Source:RGD Symbol;Acc:1309978]
-0.384559	6.13739	-6.79248	4.53111e-06	5.71101e-05	3.88855	ENSRNOG00000012106	Dnaja4	DnaJ heat shock protein family (Hsp40) member A4 [Source:RGD Symbol;Acc:1310035]
-0.687841	6.69113	-6.79074	4.54512e-06	5.72194e-05	3.86164	ENSRNOG00000009097	Immt	inner membrane mitochondrial protein [Source:RGD Symbol;Acc:1310684]
-0.51988	5.63923	-6.7895	4.55513e-06	5.72783e-05	3.9305	ENSRNOG00000019222	Tfdp1	transcription factor Dp-1 [Source:RGD Symbol;Acc:1560344]
0.384103	7.56605	6.78831	4.5647e-06	5.73313e-05	3.84137	ENSRNOG00000054775	Arf3	ADP-ribosylation factor 3 [Source:RGD Symbol;Acc:621273]
-0.939086	1.99897	-6.78707	4.57474e-06	5.73902e-05	4.44932	ENSRNOG00000008956	Cdkn2c	cyclin-dependent kinase inhibitor 2C [Source:RGD Symbol;Acc:2325]
0.443352	7.31841	6.78565	4.58625e-06	5.74675e-05	3.84661	ENSRNOG00000010389	Ndrg2	NDRG family member 2 [Source:RGD Symbol;Acc:621874]
0.265381	7.02493	6.78361	4.60287e-06	5.76084e-05	3.84391	ENSRNOG00000016013	Gprc5b	G protein-coupled receptor, class C, group 5, member B [Source:RGD Symbol;Acc:1309510]
-0.566541	8.21035	-6.7759	4.66614e-06	5.8274e-05	3.81646	ENSRNOG00000011341	Rictor	RPTOR independent companion of MTOR, complex 2 [Source:RGD Symbol;Acc:1307224]
-0.659625	5.59741	-6.77581	4.66692e-06	5.8274e-05	3.88716	ENSRNOG00000023216	Ccdc17	coiled-coil domain containing 17 [Source:RGD Symbol;Acc:1598211]
-0.275442	6.25423	-6.77445	4.67817e-06	5.83466e-05	3.84894	ENSRNOG00000010042	Wdfy2	WD repeat and FYVE domain containing 2 [Source:RGD Symbol;Acc:1307337]
-0.723706	3.61649	-6.77265	4.6931e-06	5.84648e-05	4.19034	ENSRNOG00000002192	Rell1	RELT-like 1 [Source:RGD Symbol;Acc:1307468]
-0.421589	4.68009	-6.76353	4.76963e-06	5.93493e-05	4.02429	ENSRNOG00000030416	Zfp870	zinc finger protein 870 [Source:RGD Symbol;Acc:1597136]
0.526635	7.40014	6.75558	4.83743e-06	6.01231e-05	3.78957	ENSRNOG00000028498	Wdr1	WD repeat domain 1 [Source:RGD Symbol;Acc:1305789]
-0.272376	7.63212	-6.75444	4.84723e-06	6.01752e-05	3.77412	ENSRNOG00000017251	Wdr55	WD repeat domain 55 [Source:RGD Symbol;Acc:1305640]
-0.517348	6.48301	-6.75064	4.88004e-06	6.05125e-05	3.78541	ENSRNOG00000002860	Ccdc181	coiled-coil domain containing 181 [Source:RGD Symbol;Acc:1309708]
0.512691	4.91822	6.74745	4.90774e-06	6.07857e-05	3.98353	ENSRNOG00000004314	Ppm1h	protein phosphatase, Mg2+/Mn2+ dependent, 1H [Source:RGD Symbol;Acc:1309528]
0.792637	7.32504	6.74008	4.97244e-06	6.1516e-05	3.75233	ENSRNOG00000013674	Megf10	multiple EGF-like domains 10 [Source:RGD Symbol;Acc:735084]
0.709582	2.83671	6.73643	5.00477e-06	6.18238e-05	4.36402	ENSRNOG00000003276	Myo1d	myosin ID [Source:RGD Symbol;Acc:621321]
0.348358	5.56318	6.73597	5.00884e-06	6.18238e-05	3.86656	ENSRNOG00000000440	Pbx2	PBX homeobox 2 [Source:RGD Symbol;Acc:1303084]
1.03158	4.02429	6.73405	5.02598e-06	6.19639e-05	4.11975	ENSRNOG00000015812	Tm4sf1	transmembrane 4 L six family member 1 [Source:RGD Symbol;Acc:1309652]
-0.262011	6.3803	-6.73145	5.04929e-06	6.21086e-05	3.76246	ENSRNOG00000012004	Ubap1	ubiquitin-associated protein 1 [Source:RGD Symbol;Acc:1305186]
-0.651412	3.18638	-6.73145	5.04926e-06	6.21086e-05	4.16934	ENSRNOG00000004412	Mtbp	MDM2 binding protein [Source:RGD Symbol;Acc:1565672]
-0.641922	6.18336	-6.73018	5.06067e-06	6.21773e-05	3.75917	ENSRNOG00000031993	Prim1	DNA primase subunit 1 [Source:RGD Symbol;Acc:621380]
0.370428	5.15104	6.72862	5.07475e-06	6.22789e-05	3.90662	ENSRNOG00000024112	Dgkq	diacylglycerol kinase, theta [Source:RGD Symbol;Acc:2320722]
0.506193	5.15243	6.72671	5.09205e-06	6.24198e-05	3.89619	ENSRNOG00000004281	Cobl	cordon-bleu WH2 repeat protein [Source:RGD Symbol;Acc:1312002]
0.786507	6.72674	6.72398	5.11678e-06	6.26513e-05	3.74413	ENSRNOG00000019077	Lipa	lipase A, lysosomal acid type [Source:RGD Symbol;Acc:3008]
0.774826	4.50961	6.72253	5.13007e-06	6.27018e-05	4.00349	ENSRNOG00000008236	Decr1	2,4-dienoyl-CoA reductase 1 [Source:RGD Symbol;Acc:70999]
-0.493995	5.8733	-6.72225	5.13259e-06	6.27018e-05	3.79167	ENSRNOG00000021693	Fam149a	family with sequence similarity 149, member A [Source:RGD Symbol;Acc:1586153]
0.809117	4.35263	6.7175	5.17615e-06	6.3162e-05	4.06426	ENSRNOG00000005390	Nup210	nucleoporin 210 [Source:RGD Symbol;Acc:69339]
-0.555039	3.14251	-6.70998	5.24591e-06	6.39405e-05	4.17086	ENSRNOG00000061893	Leng1	leukocyte receptor cluster member 1 [Source:RGD Symbol;Acc:1307933]
0.496115	4.86686	6.70841	5.2606e-06	6.40468e-05	3.91786	ENSRNOG00000002680	Lamc1	laminin subunit gamma 1 [Source:RGD Symbol;Acc:621052]
1.78196	1.40182	6.69521	5.38583e-06	6.54566e-05	3.955	ENSRNOG00000028460	Lrrc8e	leucine rich repeat containing 8 VRAC subunit E [Source:RGD Symbol;Acc:1311979]
-0.352399	6.08902	-6.69492	5.3886e-06	6.54566e-05	3.72393	ENSRNOG00000054468	Fam219b	family with sequence similarity 219, member B [Source:RGD Symbol;Acc:1310727]
-0.640849	5.92246	-6.69366	5.4008e-06	6.55305e-05	3.70712	ENSRNOG00000016740	NA	NA
1.58612	2.38675	6.69194	5.41732e-06	6.56567e-05	4.24133	ENSRNOG00000002341	Trim25	tripartite motif-containing 25 [Source:RGD Symbol;Acc:1594396]
0.362024	6.19134	6.68486	5.48627e-06	6.63902e-05	3.70597	ENSRNOG00000051837	Nwd2	NACHT and WD repeat domain containing 2 [Source:RGD Symbol;Acc:1563065]
-0.52315	3.44305	-6.68445	5.49022e-06	6.63902e-05	4.08358	ENSRNOG00000052869	Pierce2	piercer of microtubule wall 2 [Source:RGD Symbol;Acc:1594626]
-0.68694	4.36982	-6.68326	5.50191e-06	6.64566e-05	3.88318	ENSRNOG00000000249	Mettl23	methyltransferase like 23 [Source:RGD Symbol;Acc:1306284]
-0.328515	7.55238	-6.68161	5.51817e-06	6.6578e-05	3.63949	ENSRNOG00000033411	Usp12	ubiquitin specific peptidase 12 [Source:RGD Symbol;Acc:1308045]
0.651343	5.76852	6.67854	5.54851e-06	6.68689e-05	3.7731	ENSRNOG00000006235	Nell2	neural EGFL like 2 [Source:RGD Symbol;Acc:620999]
1.64704	1.4946	6.67226	5.61105e-06	6.75418e-05	4.03135	ENSRNOG00000003357	Col3a1	collagen type III alpha 1 chain [Source:RGD Symbol;Acc:71029]
1.02756	6.02882	6.67105	5.62324e-06	6.75418e-05	3.76795	ENSRNOG00000016592	Gnai2	G protein subunit alpha i2 [Source:RGD Symbol;Acc:620243]
0.755781	3.79986	6.67136	5.62008e-06	6.75418e-05	4.03584	ENSRNOG00000003114	B4galt4	beta-1,4-galactosyltransferase 4 [Source:RGD Symbol;Acc:1307880]
0.64006	3.15302	6.6675	5.65894e-06	6.78946e-05	4.14223	ENSRNOG00000012473	Cflar	CASP8 and FADD-like apoptosis regulator [Source:RGD Symbol;Acc:620847]
-0.431717	4.84566	-6.66378	5.69672e-06	6.82716e-05	3.81962	ENSRNOG00000029740	Slc35g1	solute carrier family 35, member G1 [Source:RGD Symbol;Acc:1595908]
1.02217	4.32122	6.66232	5.71157e-06	6.83731e-05	3.98359	ENSRNOG00000033051	Slc22a15	solute carrier family 22, member 15 [Source:RGD Symbol;Acc:1311184]
-0.450917	3.91438	-6.65898	5.74578e-06	6.87059e-05	3.93725	ENSRNOG00000045561	Uqcc3	ubiquinol-cytochrome c reductase complex assembly factor 3 [Source:RGD Symbol;Acc:1597344]
0.321197	6.53937	6.65654	5.77098e-06	6.89304e-05	3.63374	ENSRNOG00000059705	Elmo1	engulfment and cell motility 1 [Source:RGD Symbol;Acc:1308182]
-0.443316	5.55319	-6.65366	5.80071e-06	6.92085e-05	3.68017	ENSRNOG00000061139	Taf1a	TATA-box binding protein associated factor, RNA polymerase I subunit A [Source:RGD Symbol;Acc:1305698]
0.756677	4.8431	6.65048	5.8338e-06	6.95259e-05	3.85663	ENSRNOG00000010447	Tmod2	tropomodulin 2 [Source:RGD Symbol;Acc:61948]
0.961881	3.92612	6.64114	5.93214e-06	7.04749e-05	3.96721	ENSRNOG00000038999	RT1-A1	RT1 class Ia, locus A1 [Source:RGD Symbol;Acc:1595924]
-0.54374	5.19177	-6.64174	5.92584e-06	7.04749e-05	3.69091	ENSRNOG00000012166	Adal	adenosine deaminase-like [Source:RGD Symbol;Acc:1359517]
-0.678379	5.90055	-6.64105	5.93314e-06	7.04749e-05	3.61034	ENSRNOG00000048101	Zfp397	zinc finger protein 397 [Source:RGD Symbol;Acc:6504280]
0.49772	8.13566	6.63923	5.95248e-06	7.05484e-05	3.56698	ENSRNOG00000014083	Iqsec3	IQ motif and Sec7 domain ArfGEF 3 [Source:RGD Symbol;Acc:1593191]
0.309684	7.01998	6.63949	5.94976e-06	7.05484e-05	3.57834	ENSRNOG00000050983	Hpcal4	hippocalcin-like 4 [Source:RGD Symbol;Acc:708491]
-0.683266	8.50983	-6.63222	6.02772e-06	7.13613e-05	3.55605	ENSRNOG00000010150	Strbp	spermatid perinuclear RNA binding protein [Source:RGD Symbol;Acc:620673]
-0.273503	6.27171	-6.63158	6.03464e-06	7.13645e-05	3.58154	ENSRNOG00000027124	Tdg	thymine-DNA glycosylase [Source:RGD Symbol;Acc:620959]
-0.950984	4.81021	-6.62778	6.07586e-06	7.17728e-05	3.70959	ENSRNOG00000009338	NA	NA
-1.05713	4.52485	-6.6259	6.09642e-06	7.19364e-05	3.84219	ENSRNOG00000038119	AABR07034706.1	RIKEN cDNA A930003A15 gene [Source:MGI Symbol;Acc:MGI:1915412]
0.752463	6.00942	6.62458	6.11088e-06	7.20278e-05	3.60022	ENSRNOG00000027540	Eeig2	EEIG family member 2 [Source:RGD Symbol;Acc:1310037]
-0.813556	5.48562	-6.62266	6.13196e-06	7.21969e-05	3.61283	ENSRNOG00000020274	Taf5	TATA-box binding protein associated factor 5 [Source:RGD Symbol;Acc:1311332]
-0.407904	6.58102	-6.61888	6.17361e-06	7.26077e-05	3.53901	ENSRNOG00000010602	Birc2	baculoviral IAP repeat-containing 2 [Source:RGD Symbol;Acc:620690]
1.05081	3.90823	6.61258	6.24375e-06	7.33522e-05	3.89487	ENSRNOG00000004737	Cd48	Cd48 molecule [Source:RGD Symbol;Acc:620620]
-1.41485	1.44641	-6.60962	6.27712e-06	7.35829e-05	4.1521	ENSRNOG00000054767	LOC252890	Z39 small nucleolar RNA [Source:RGD Symbol;Acc:727842]
-6.16873	-1.1752	-6.60971	6.27601e-06	7.35829e-05	0.0186438	ENSRNOG00000054418	AABR07005779.3	None
-0.439804	4.82732	-6.60885	6.28579e-06	7.36041e-05	3.69638	ENSRNOG00000017102	Cmtr2	cap methyltransferase 2 [Source:RGD Symbol;Acc:1309394]
0.480605	4.99737	6.6032	6.34987e-06	7.41925e-05	3.71054	ENSRNOG00000007410	Dab1	DAB adaptor protein 1 [Source:RGD Symbol;Acc:628770]
-0.389252	5.32473	-6.60369	6.34423e-06	7.41925e-05	3.62094	ENSRNOG00000022260	Senp1	SUMO specific peptidase 1 [Source:RGD Symbol;Acc:1310275]
0.842771	4.36976	6.6025	6.35781e-06	7.42044e-05	3.78514	ENSRNOG00000030104	Vom2r44	vomeronasal 2 receptor 44 [Source:RGD Symbol;Acc:708515]
-0.475124	4.47174	-6.60161	6.36799e-06	7.42424e-05	3.76343	ENSRNOG00000012020	Nsun4	NOP2/Sun RNA methyltransferase 4 [Source:RGD Symbol;Acc:1559652]
-0.342711	7.00614	-6.60076	6.37767e-06	7.42746e-05	3.49542	ENSRNOG00000043099	Ddx21	DExD-box helicase 21 [Source:RGD Symbol;Acc:1307306]
0.899634	5.0917	6.59019	6.49996e-06	7.56166e-05	3.7249	ENSRNOG00000024923	Nnat	neuronatin [Source:RGD Symbol;Acc:620155]
0.653021	6.17626	6.5889	6.51512e-06	7.5711e-05	3.55583	ENSRNOG00000052113	Ppp1r9b	protein phosphatase 1, regulatory subunit 9B [Source:RGD Symbol;Acc:632281]
-0.521857	7.66696	-6.5817	6.59997e-06	7.6614e-05	3.45421	ENSRNOG00000056984	Baz2b	bromodomain adjacent to zinc finger domain, 2B [Source:RGD Symbol;Acc:1309801]
0.515431	3.8963	6.5793	6.62852e-06	7.68621e-05	3.87271	ENSRNOG00000059456	Grk3	G protein-coupled receptor kinase 3 [Source:RGD Symbol;Acc:2063]
1.93707	2.38072	6.56989	6.74183e-06	7.80916e-05	4.06882	ENSRNOG00000022884	Cd84	CD84 molecule [Source:RGD Symbol;Acc:1564553]
0.985234	4.48344	6.56569	6.79301e-06	7.85996e-05	3.79904	ENSRNOG00000013391	Sorbs2	sorbin and SH3 domain containing 2 [Source:RGD Symbol;Acc:620061]
0.506959	6.14758	6.56498	6.80163e-06	7.86145e-05	3.48469	ENSRNOG00000052725	Shisal1	shisa like 1 [Source:RGD Symbol;Acc:1566029]
-0.792616	1.99223	-6.56118	6.84834e-06	7.90692e-05	4.06885	ENSRNOG00000001618	Ripk4	receptor-interacting serine-threonine kinase 4 [Source:RGD Symbol;Acc:1311691]
-0.757915	4.6836	-6.55994	6.86371e-06	7.91614e-05	3.60618	ENSRNOG00000000778	Znrd1as1	ZNRD1 antisense RNA 1 [Source:RGD Symbol;Acc:1564067]
-0.285675	6.4968	-6.55527	6.9217e-06	7.97445e-05	3.43536	ENSRNOG00000009255	NA	NA
-0.850366	4.87184	-6.55343	6.9447e-06	7.99237e-05	3.63913	ENSRNOG00000009881	Fam161a	FAM161 centrosomal protein A [Source:RGD Symbol;Acc:1304999]
-0.788584	4.93641	-6.54927	6.99695e-06	8.04387e-05	3.53781	ENSRNOG00000009782	Efcab7	EF-hand calcium binding domain 7 [Source:RGD Symbol;Acc:1561825]
-0.459365	7.21268	-6.54617	7.03612e-06	8.08024e-05	3.38847	ENSRNOG00000010800	Hadhb	hydroxyacyl-CoA dehydrogenase trifunctional multienzyme complex subunit beta [Source:RGD Symbol;Acc:620513]
0.949138	3.45217	6.54451	7.05731e-06	8.08878e-05	3.91823	ENSRNOG00000010833	Mthfd2	methylenetetrahydrofolate dehydrogenase (NADP+ dependent) 2, methenyltetrahydrofolate cyclohydrolase [Source:RGD Symbol;Acc:1311313]
-1.16498	7.66104	-6.5444	7.05864e-06	8.08878e-05	3.38651	ENSRNOG00000005512	Ndufa4	Ndufa4, mitochondrial complex associated [Source:RGD Symbol;Acc:1584719]
0.636521	4.36754	6.54263	7.08122e-06	8.09873e-05	3.67873	ENSRNOG00000014143	Col24a1	collagen type XXIV alpha 1 chain [Source:RGD Symbol;Acc:1565539]
-0.325419	6.79229	-6.54254	7.08242e-06	8.09873e-05	3.39832	ENSRNOG00000009934	Emc3	ER membrane protein complex subunit 3 [Source:RGD Symbol;Acc:1311566]
3.1377	2.52517	6.54007	7.11398e-06	8.12615e-05	3.89651	ENSRNOG00000015498	Il17rb	interleukin 17 receptor B [Source:RGD Symbol;Acc:1311392]
-0.726322	6.62525	-6.53894	7.12856e-06	8.13414e-05	3.38392	ENSRNOG00000014002	St7l	suppression of tumorigenicity 7-like [Source:RGD Symbol;Acc:1359336]
1.50188	3.91633	6.53212	7.2168e-06	8.22607e-05	3.77304	ENSRNOG00000003059	Optc	opticin [Source:RGD Symbol;Acc:1304916]
-0.344034	4.95205	-6.52603	7.29667e-06	8.30829e-05	3.5231	ENSRNOG00000014891	Ptar1	protein prenyltransferase alpha subunit repeat containing 1 [Source:RGD Symbol;Acc:708369]
-0.675761	5.89806	-6.51784	7.4055e-06	8.42327e-05	3.38487	ENSRNOG00000006858	Pyurf	PIGY upstream open reading frame [Source:RGD Symbol;Acc:1565524]
-0.34228	6.12287	-6.51653	7.42305e-06	8.43428e-05	3.38475	ENSRNOG00000055531	Saa4	serum amyloid A4 [Source:RGD Symbol;Acc:1307371]
1.97439	1.53689	6.5137	7.46115e-06	8.4418e-05	3.56398	ENSRNOG00000017020	Inpp5d	inositol polyphosphate-5-phosphatase D [Source:RGD Symbol;Acc:2914]
-0.462112	3.70827	-6.51474	7.44711e-06	8.4418e-05	3.70902	ENSRNOG00000015052	Star	steroidogenic acute regulatory protein [Source:RGD Symbol;Acc:3770]
-0.988478	3.06466	-6.51415	7.45507e-06	8.4418e-05	3.90376	ENSRNOG00000014909	Sh2d5	SH2 domain containing 5 [Source:RGD Symbol;Acc:1305952]
-1.04021	6.02224	-6.5143	7.45306e-06	8.4418e-05	3.36067	ENSRNOG00000010274	Smc4	structural maintenance of chromosomes 4 [Source:RGD Symbol;Acc:1306680]
1.60129	1.83472	6.51276	7.47377e-06	8.44717e-05	3.88535	ENSRNOG00000018759	Slc45a2	solute carrier family 45, member 2 [Source:RGD Symbol;Acc:1306690]
-0.457389	4.55976	-6.51198	7.48432e-06	8.45019e-05	3.57107	ENSRNOG00000025388	Mrpl33	mitochondrial ribosomal protein L33 [Source:RGD Symbol;Acc:2322809]
1.41846	1.88741	6.51033	7.50671e-06	8.45151e-05	3.89747	ENSRNOG00000010489	Samd4a	sterile alpha motif domain containing 4A [Source:RGD Symbol;Acc:1310361]
1.07955	3.63102	6.50924	7.52153e-06	8.45151e-05	3.89968	ENSRNOG00000050169	Pet100	PET100 cytochrome c oxidase chaperone [Source:RGD Symbol;Acc:1585222]
-0.351961	5.64051	-6.51074	7.50107e-06	8.45151e-05	3.40962	ENSRNOG00000022347	Atpsckmt	ATP synthase c subunit lysine N-methyltransferase [Source:RGD Symbol;Acc:1560629]
-0.441987	7.27714	-6.50987	7.51289e-06	8.45151e-05	3.32038	ENSRNOG00000013413	Rorb	RAR-related orphan receptor B [Source:RGD Symbol;Acc:1306778]
-0.460356	6.69217	-6.50899	7.52489e-06	8.45151e-05	3.32971	ENSRNOG00000014462	Fnta	farnesyltransferase, CAAX box, alpha [Source:RGD Symbol;Acc:2625]
1.67853	4.24157	6.5074	7.54663e-06	8.45822e-05	3.66569	ENSRNOG00000043451	Spp1	secreted phosphoprotein 1 [Source:RGD Symbol;Acc:3752]
0.555153	3.85933	6.50787	7.54014e-06	8.45822e-05	3.70875	ENSRNOG00000030285	Epha3	Eph receptor A3 [Source:RGD Symbol;Acc:68389]
-0.818459	5.56894	-6.50619	7.56318e-06	8.46792e-05	3.38905	ENSRNOG00000046338	NA	NA
-0.288604	6.7369	-6.5005	7.6414e-06	8.54658e-05	3.31687	ENSRNOG00000021289	Rbbp5	RB binding protein 5, histone lysine methyltransferase complex subunit [Source:RGD Symbol;Acc:1305532]
-1.10666	4.22216	-6.49829	7.672e-06	8.57186e-05	3.54836	ENSRNOG00000010515	Trim59	tripartite motif-containing 59 [Source:RGD Symbol;Acc:1311956]
-0.411525	4.86976	-6.49604	7.70329e-06	8.59786e-05	3.48747	ENSRNOG00000003038	Sft2d2	SFT2 domain containing 2 [Source:RGD Symbol;Acc:1310623]
-0.491281	3.71442	-6.48942	7.79629e-06	8.68863e-05	3.64725	ENSRNOG00000019979	B3galt6	Beta-1,3-galactosyltransferase 6 [Source:RGD Symbol;Acc:1309558]
-0.503211	8.05354	-6.4891	7.80082e-06	8.68863e-05	3.28409	ENSRNOG00000015425	Ssx2ip	SSX family member 2 interacting protein [Source:RGD Symbol;Acc:708490]
-1.0018	12.4536	-6.48683	7.83297e-06	8.7154e-05	3.39771	ENSRNOG00000011144	Rho	rhodopsin [Source:RGD Symbol;Acc:3573]
-0.580075	7.74991	-6.48588	7.84647e-06	8.72137e-05	3.27616	ENSRNOG00000011937	Sgtb	small glutamine rich tetratricopeptide repeat co-chaperone beta [Source:RGD Symbol;Acc:727976]
-0.73417	7.88505	-6.48475	7.86244e-06	8.73008e-05	3.27503	ENSRNOG00000014084	Sp1	Sp1 transcription factor [Source:RGD Symbol;Acc:3738]
0.32684	6.70598	6.48375	7.87681e-06	8.73698e-05	3.29495	ENSRNOG00000013147	Cacna1d	calcium voltage-gated channel subunit alpha1 D [Source:RGD Symbol;Acc:70973]
-0.480057	4.48209	-6.48241	7.89586e-06	8.74906e-05	3.52786	ENSRNOG00000057815	Ccdc191	coiled-coil domain containing 191 [Source:RGD Symbol;Acc:1566314]
5.23903	0.722141	6.47724	7.97028e-06	8.81808e-05	1.32791	ENSRNOG00000009390	Edn2	endothelin 2 [Source:RGD Symbol;Acc:2533]
0.290107	5.77602	6.47694	7.97459e-06	8.81808e-05	3.36594	ENSRNOG00000052289	Ptdss1	phosphatidylserine synthase 1 [Source:RGD Symbol;Acc:1308949]
0.42346	5.37262	6.46993	8.07664e-06	8.91899e-05	3.39504	ENSRNOG00000002449	Maged2	MAGE family member D2 [Source:RGD Symbol;Acc:70899]
-0.440644	5.62592	-6.46953	8.08247e-06	8.91899e-05	3.32924	ENSRNOG00000002443	Mfap3	microfibril associated protein 3 [Source:RGD Symbol;Acc:1359463]
0.683985	5.95532	6.46314	8.17673e-06	9.01373e-05	3.30944	ENSRNOG00000010593	Ctnnal1	catenin alpha-like 1 [Source:RGD Symbol;Acc:1311434]
0.441466	5.62393	6.46192	8.19487e-06	9.02445e-05	3.34964	ENSRNOG00000003063	Phka1	phosphorylase kinase regulatory subunit alpha 1 [Source:RGD Symbol;Acc:621522]
-0.652153	7.88942	-6.4608	8.21148e-06	9.03346e-05	3.23004	ENSRNOG00000051965	Smad4	SMAD family member 4 [Source:RGD Symbol;Acc:3033]
-0.392973	6.88587	-6.45828	8.24913e-06	9.06559e-05	3.22939	ENSRNOG00000017230	Cox15	cytochrome c oxidase assembly homolog COX15 [Source:RGD Symbol;Acc:1312043]
-0.627663	10.2526	-6.45328	8.32442e-06	9.13897e-05	3.26313	ENSRNOG00000021168	Anp32e	acidic nuclear phosphoprotein 32 family member E [Source:RGD Symbol;Acc:1310611]
0.529915	3.86181	6.4501	8.37261e-06	9.18248e-05	3.60796	ENSRNOG00000007102	Acss1	acyl-CoA synthetase short-chain family member 1 [Source:RGD Symbol;Acc:1306246]
-0.272907	6.64709	-6.44723	8.41646e-06	9.22113e-05	3.22876	ENSRNOG00000031827	Arih2	ariadne RBR E3 ubiquitin protein ligase 2 [Source:RGD Symbol;Acc:1305839]
-0.495289	5.55401	-6.44364	8.47152e-06	9.27199e-05	3.28211	ENSRNOG00000004360	Gemin2	gem (nuclear organelle) associated protein 2 [Source:RGD Symbol;Acc:620842]
-0.284657	8.60818	-6.43921	8.54007e-06	9.32798e-05	3.19683	ENSRNOG00000003689	Nono	non-POU domain containing, octamer-binding [Source:RGD Symbol;Acc:1549738]
-0.449432	6.72285	-6.43935	8.53782e-06	9.32798e-05	3.19938	ENSRNOG00000058973	Atad2b	ATPase family, AAA domain containing 2B [Source:RGD Symbol;Acc:1566199]
1.40719	4.12915	6.43657	8.58108e-06	9.34423e-05	3.54387	ENSRNOG00000049115	Ccr5	C-C motif chemokine receptor 5 [Source:RGD Symbol;Acc:620596]
0.883926	2.3241	6.43671	8.57894e-06	9.34423e-05	3.85398	ENSRNOG00000004666	Prr5l	proline rich 5 like [Source:RGD Symbol;Acc:1309969]
-0.532791	6.47966	-6.43726	8.57029e-06	9.34423e-05	3.22896	ENSRNOG00000002129	Lrrc8b	leucine rich repeat containing 8 VRAC subunit B [Source:RGD Symbol;Acc:1563429]
-0.838552	6.04899	-6.42812	8.71407e-06	9.47943e-05	3.19578	ENSRNOG00000009045	Alg6	ALG6, alpha-1,3-glucosyltransferase [Source:RGD Symbol;Acc:1308815]
3.89919	4.47766	6.42574	8.75182e-06	9.51084e-05	3.82078	ENSRNOG00000046834	C3	complement C3 [Source:RGD Symbol;Acc:2232]
-0.372076	6.64032	-6.42132	8.82259e-06	9.57804e-05	3.16767	ENSRNOG00000020782	Pspc1	paraspeckle component 1 [Source:RGD Symbol;Acc:1310122]
0.363596	6.56968	6.41595	8.90935e-06	9.66246e-05	3.17543	ENSRNOG00000005905	Pde4b	phosphodiesterase 4B [Source:RGD Symbol;Acc:3280]
-0.606318	2.90046	-6.41288	8.95927e-06	9.70678e-05	3.6877	ENSRNOG00000057945	Fancg	FA complementation group G [Source:RGD Symbol;Acc:1587477]
0.535729	4.59978	6.41008	9.00503e-06	9.74651e-05	3.40971	ENSRNOG00000011700	Ptprm	protein tyrosine phosphatase, receptor type, M [Source:RGD Symbol;Acc:620776]
-0.784079	4.90254	-6.40935	9.01712e-06	9.74976e-05	3.35078	ENSRNOG00000027463	Adamts3	ADAM metallopeptidase with thrombospondin type 1, motif 3 [Source:RGD Symbol;Acc:1310750]
0.494813	3.54041	6.40674	9.06013e-06	9.7864e-05	3.57478	ENSRNOG00000059322	N4bp2l1	NEDD4 binding protein 2-like 1 [Source:RGD Symbol;Acc:1595713]
-1.10692	5.49318	-6.40578	9.07593e-06	9.79361e-05	3.27065	ENSRNOG00000049075	Fabp5	fatty acid binding protein 5 [Source:RGD Symbol;Acc:70997]
2.25374	2.73938	6.39618	9.23626e-06	9.9566e-05	3.77999	ENSRNOG00000016117	Myof	myoferlin [Source:RGD Symbol;Acc:1564216]
0.468348	4.47097	6.39543	9.24879e-06	9.96009e-05	3.40898	ENSRNOG00000005853	Tacr1	tachykinin receptor 1 [Source:RGD Symbol;Acc:3811]
-0.556778	6.48818	-6.39343	9.28265e-06	9.98653e-05	3.11534	ENSRNOG00000026132	Trdmt1	tRNA aspartic acid methyltransferase 1 [Source:RGD Symbol;Acc:1306292]
-0.400978	8.00309	-6.39115	9.32135e-06	0.000100181	3.09984	ENSRNOG00000014691	Ric3	RIC3 acetylcholine receptor chaperone [Source:RGD Symbol;Acc:1588939]
0.345947	5.17934	6.38501	9.42642e-06	0.000101209	3.26509	ENSRNOG00000009076	Ttpal	alpha tocopherol transfer protein like [Source:RGD Symbol;Acc:1305754]
-0.507306	5.01318	-6.38376	9.44796e-06	0.000101339	3.24192	ENSRNOG00000016273	Fam136a	family with sequence similarity 136, member A [Source:RGD Symbol;Acc:1304825]
1.1206	1.84082	6.38103	9.49524e-06	0.000101643	3.70041	ENSRNOG00000000172	Sqor	sulfide quinone oxidoreductase [Source:RGD Symbol;Acc:1564504]
-0.396377	8.71999	-6.38147	9.48756e-06	0.000101643	3.09039	ENSRNOG00000018569	Ahcyl1	adenosylhomocysteinase-like 1 [Source:RGD Symbol;Acc:1309768]
-0.44782	4.78946	-6.37873	9.53523e-06	0.000101969	3.27366	ENSRNOG00000031197	F8	coagulation factor VIII [Source:RGD Symbol;Acc:727845]
0.319729	7.41452	6.3779	9.54962e-06	0.000102021	3.07801	ENSRNOG00000009198	Rab6b	RAB6B, member RAS oncogene family [Source:RGD Symbol;Acc:1309958]
0.805693	4.64865	6.3717	9.6585e-06	0.000103082	3.3842	ENSRNOG00000019147	Stom	stomatin [Source:RGD Symbol;Acc:1305109]
-0.421171	5.36299	-6.36881	9.7095e-06	0.000103523	3.17463	ENSRNOG00000005346	Tmem128	transmembrane protein 128 [Source:RGD Symbol;Acc:1310481]
-0.501146	6.98255	-6.36744	9.7339e-06	0.00010368	3.05672	ENSRNOG00000012982	Map9	microtubule-associated protein 9 [Source:RGD Symbol;Acc:1560368]
-0.814418	8.06254	-6.36469	9.78304e-06	0.0001041	3.0513	ENSRNOG00000058643	Zfp281	zinc finger protein 281 [Source:RGD Symbol;Acc:1305139]
-0.471878	3.58836	-6.36128	9.84418e-06	0.000104647	3.46152	ENSRNOG00000012322	Pex7	peroxisomal biogenesis factor 7 [Source:RGD Symbol;Acc:1308483]
-1.49297	5.55421	-6.35501	9.95772e-06	0.000105749	3.11058	ENSRNOG00000002100	LOC108348180	signal recognition particle subunit SRP72-like [Source:RGD Symbol;Acc:11405956]
-0.509631	4.91271	-6.3483	1.00808e-05	0.00010695	3.2016	ENSRNOG00000046666	NA	NA
-0.317317	6.0493	-6.3467	1.01104e-05	0.000107056	3.06685	ENSRNOG00000021215	Rbm8a	RNA binding motif protein 8A [Source:RGD Symbol;Acc:1310099]
-0.353627	8.37276	-6.34668	1.01107e-05	0.000107056	3.02032	ENSRNOG00000010037	Epb41	erythrocyte membrane protein band 4.1 [Source:RGD Symbol;Acc:1564762]
0.694284	3.96118	6.34487	1.01444e-05	0.000107306	3.41496	ENSRNOG00000018859	Pik3ip1	phosphoinositide-3-kinase interacting protein 1 [Source:RGD Symbol;Acc:1311203]
-0.442568	8.96664	-6.33478	1.03336e-05	0.0001092	3.00575	ENSRNOG00000000248	Srsf2	serine and arginine rich splicing factor 2 [Source:RGD Symbol;Acc:1359422]
-0.486443	6.3838	-6.3294	1.0436e-05	0.000110174	3.02343	ENSRNOG00000001158	Abcg1	ATP binding cassette subfamily G member 1 [Source:RGD Symbol;Acc:620294]
-0.351992	7.64071	-6.32806	1.04616e-05	0.000110336	2.97901	ENSRNOG00000061058	Csde1	cold shock domain containing E1 [Source:RGD Symbol;Acc:619726]
-0.797447	2.9492	-6.31907	1.06355e-05	0.000112059	3.55981	ENSRNOG00000019022	Fam89a	family with sequence similarity 89, member A [Source:RGD Symbol;Acc:1309879]
0.695939	4.15056	6.31821	1.06523e-05	0.000112126	3.34597	ENSRNOG00000012404	Thrsp	thyroid hormone responsive [Source:RGD Symbol;Acc:3859]
5.98263	-0.373934	6.31695	1.0677e-05	0.000112166	-0.287941	ENSRNOG00000032844	RT1-Da	RT1 class II, locus Da [Source:RGD Symbol;Acc:1593283]
-0.83092	8.54812	-6.31737	1.06689e-05	0.000112166	2.9676	ENSRNOG00000030572	Smc5	structural maintenance of chromosomes 5 [Source:RGD Symbol;Acc:1307492]
0.726604	3.4752	6.31549	1.07057e-05	0.000112247	3.44868	ENSRNOG00000058111	Itga2	integrin subunit alpha 2 [Source:RGD Symbol;Acc:621632]
-0.752205	6.585	-6.3158	1.06995e-05	0.000112247	2.96448	ENSRNOG00000038449	Tigd2	tigger transposable element derived 2 [Source:RGD Symbol;Acc:1559612]
-0.405545	4.79074	-6.31309	1.07529e-05	0.000112413	3.16784	ENSRNOG00000019840	Mdp1	magnesium-dependent phosphatase 1 [Source:RGD Symbol;Acc:1311147]
-0.767557	6.62591	-6.31357	1.07435e-05	0.000112413	2.96581	ENSRNOG00000020361	Ip6k2	inositol hexakisphosphate kinase 2 [Source:RGD Symbol;Acc:620529]
-1.00665	5.56443	-6.31382	1.07386e-05	0.000112413	3.02595	ENSRNOG00000050490	Mir3064	microRNA 3064 [Source:RGD Symbol;Acc:9685093]
-0.456196	6.33777	-6.31247	1.07651e-05	0.000112431	2.97112	ENSRNOG00000028215	Nup160	nucleoporin 160 [Source:RGD Symbol;Acc:1311052]
-0.994478	5.12606	-6.30436	1.09268e-05	0.000114008	3.12307	ENSRNOG00000010952	Ift122	intraflagellar transport 122 [Source:RGD Symbol;Acc:1311302]
1.04269	2.37647	6.29307	1.11558e-05	0.000116172	3.5989	ENSRNOG00000025115	Exph5	exophilin 5 [Source:RGD Symbol;Acc:1560308]
-0.509718	6.2661	-6.2934	1.1149e-05	0.000116172	2.93936	ENSRNOG00000051868	RGD1561277	RGD1561277 [Source:RGD Symbol;Acc:1561277]
-0.38618	4.65165	-6.29087	1.12009e-05	0.000116528	3.12458	ENSRNOG00000026690	Kin	Kin17 DNA and RNA binding protein [Source:RGD Symbol;Acc:1596107]
-0.794908	6.8424	-6.28888	1.1242e-05	0.000116843	2.9069	ENSRNOG00000006244	Lztfl1	leucine zipper transcription factor-like 1 [Source:RGD Symbol;Acc:1306628]
-0.575019	6.57036	-6.28565	1.1309e-05	0.000117426	2.9109	ENSRNOG00000009658	Rnf19a	ring finger protein 19A, RBR E3 ubiquitin protein ligase [Source:RGD Symbol;Acc:1307807]
1.13558	5.55436	6.28385	1.13465e-05	0.000117587	3.08499	ENSRNOG00000001295	S100b	S100 calcium binding protein B [Source:RGD Symbol;Acc:3615]
-0.584777	4.93762	-6.28389	1.13456e-05	0.000117587	3.05213	ENSRNOG00000008049	Max	MYC associated factor X [Source:RGD Symbol;Acc:621101]
-0.275716	8.52427	-6.27882	1.14521e-05	0.000118567	2.89301	ENSRNOG00000002940	Ankrd17	ankyrin repeat domain 17 [Source:RGD Symbol;Acc:1562348]
0.375977	7.52704	6.2695	1.16501e-05	0.000120501	2.87565	ENSRNOG00000017939	Chn1	chimerin 1 [Source:RGD Symbol;Acc:620139]
2.28559	2.60671	6.26751	1.16929e-05	0.000120827	3.5576	ENSRNOG00000015972	Ano5	anoctamin 5 [Source:RGD Symbol;Acc:1564265]
-0.273234	7.15442	-6.26624	1.17203e-05	0.000120993	2.86583	ENSRNOG00000032254	Sin3a	SIN3 transcription regulator family member A [Source:RGD Symbol;Acc:1311598]
-0.603398	7.19561	-6.26338	1.17822e-05	0.000121515	2.85662	ENSRNOG00000014215	Klf9	KLF transcription factor 9 [Source:RGD Symbol;Acc:70934]
-1.64544	2.39895	-6.25887	1.18805e-05	0.000122412	3.50077	ENSRNOG00000008609	Capn3	calpain 3 [Source:RGD Symbol;Acc:2269]
1.91691	1.6363	6.25739	1.1913e-05	0.000122628	3.39734	ENSRNOG00000008602	Steap4	STEAP4 metalloreductase [Source:RGD Symbol;Acc:1560331]
-0.570421	8.33882	-6.25582	1.19476e-05	0.000122866	2.84739	ENSRNOG00000016790	Kmt5b	lysine methyltransferase 5B [Source:RGD Symbol;Acc:1311637]
-0.75691	6.74117	-6.25357	1.19972e-05	0.000123259	2.84193	ENSRNOG00000011655	Dcaf10	DDB1 and CUL4 associated factor 10 [Source:RGD Symbol;Acc:1304730]
-0.598529	6.34422	-6.25121	1.20496e-05	0.000123679	2.85659	ENSRNOG00000001108	N4bp2l2	NEDD4 binding protein 2-like 2 [Source:RGD Symbol;Acc:1359603]
0.782786	3.73857	6.24133	1.22711e-05	0.000125832	3.2556	ENSRNOG00000015225	Gramd2b	GRAM domain containing 2B [Source:RGD Symbol;Acc:1311016]
0.276553	7.34967	6.2402	1.22969e-05	0.000125976	2.81677	ENSRNOG00000010311	Dzip1	DAZ interacting zinc finger protein 1 [Source:RGD Symbol;Acc:1307701]
-0.602918	7.56953	-6.23635	1.23845e-05	0.000126752	2.80427	ENSRNOG00000007106	Sos1	SOS Ras/Rac guanine nucleotide exchange factor 1 [Source:RGD Symbol;Acc:1310949]
-0.738344	6.87886	-6.23519	1.2411e-05	0.000126902	2.80367	ENSRNOG00000013662	Erich6	glutamate-rich 6 [Source:RGD Symbol;Acc:1559451]
0.832944	7.07109	6.23231	1.24771e-05	0.000127457	2.8457	ENSRNOG00000016863	Pnma8b	PNMA family member 8B [Source:RGD Symbol;Acc:1560435]
-0.547921	7.13336	-6.23004	1.25297e-05	0.000127872	2.80677	ENSRNOG00000007478	Cry2	cryptochrome circadian regulator 2 [Source:RGD Symbol;Acc:620935]
-0.63413	5.68978	-6.22926	1.25476e-05	0.000127933	2.85876	ENSRNOG00000004218	Klhl28	kelch-like family member 28 [Source:RGD Symbol;Acc:1311326]
0.353779	5.09644	6.22226	1.27111e-05	0.000129477	2.97681	ENSRNOG00000052022	Pnma3	PNMA family member 3 [Source:RGD Symbol;Acc:1563752]
0.622642	3.69545	6.22075	1.27466e-05	0.000129715	3.2047	ENSRNOG00000008180	Lyn	LYN proto-oncogene, Src family tyrosine kinase [Source:RGD Symbol;Acc:621017]
0.575726	2.91305	6.22015	1.27607e-05	0.000129735	3.39231	ENSRNOG00000020514	Sox6	SRY-box transcription factor 6 [Source:RGD Symbol;Acc:1309000]
-0.812717	2.59485	-6.21926	1.27818e-05	0.000129827	3.30966	ENSRNOG00000047748	AABR07038567.1	None
1.86108	2.29036	6.2176	1.2821e-05	0.000130103	3.3923	ENSRNOG00000017354	Zyx	zyxin [Source:RGD Symbol;Acc:620698]
2.33171	1.10152	6.21695	1.28364e-05	0.000130135	3.13432	ENSRNOG00000046452	Fcgr2b	Fc gamma receptor 2B [Source:RGD Symbol;Acc:631331]
1.31298	2.81739	6.21115	1.29748e-05	0.000131414	3.38515	ENSRNOG00000021726	Tlr3	toll-like receptor 3 [Source:RGD Symbol;Acc:735171]
0.464571	5.21409	6.21006	1.3001e-05	0.000131555	2.9544	ENSRNOG00000004027	Aldh9a1	aldehyde dehydrogenase 9 family, member A1 [Source:RGD Symbol;Acc:68409]
0.965273	3.90561	6.20515	1.31197e-05	0.000132631	3.24298	ENSRNOG00000028892	Prr36	proline rich 36 [Source:RGD Symbol;Acc:1566084]
0.319377	6.05986	6.203	1.3172e-05	0.000132954	2.82499	ENSRNOG00000013971	Psat1	phosphoserine aminotransferase 1 [Source:RGD Symbol;Acc:735170]
-0.246416	7.95899	-6.20282	1.31764e-05	0.000132954	2.74254	ENSRNOG00000020668	Cpsf7	cleavage and polyadenylation specific factor 7 [Source:RGD Symbol;Acc:1305441]
0.761981	3.67418	6.19517	1.33642e-05	0.000134454	3.25047	ENSRNOG00000014371	Cdh13	cadherin 13 [Source:RGD Symbol;Acc:619745]
0.395014	8.35688	6.19557	1.33543e-05	0.000134454	2.73343	ENSRNOG00000027864	Ppia	peptidylprolyl isomerase A [Source:RGD Symbol;Acc:3372]
0.343482	6.27884	6.19598	1.33442e-05	0.000134454	2.78749	ENSRNOG00000019400	Dag1	dystroglycan 1 [Source:RGD Symbol;Acc:621890]
-0.262381	7.32456	-6.19473	1.33752e-05	0.000134454	2.72817	ENSRNOG00000018691	Ccnl2	cyclin L2 [Source:RGD Symbol;Acc:1309149]
0.95097	4.13655	6.19374	1.33996e-05	0.000134573	3.08899	ENSRNOG00000021156	Vegfb	vascular endothelial growth factor B [Source:RGD Symbol;Acc:619799]
0.26558	7.25836	6.19309	1.34158e-05	0.00013461	2.73072	ENSRNOG00000017060	Ryr2	ryanodine receptor 2 [Source:RGD Symbol;Acc:620314]
-0.375271	9.26306	-6.18815	1.35392e-05	0.000135721	2.73312	ENSRNOG00000027191	Birc6	baculoviral IAP repeat-containing 6 [Source:RGD Symbol;Acc:1307247]
1.02951	1.91946	6.18355	1.36551e-05	0.000136628	3.40566	ENSRNOG00000019357	Tax1bp3	Tax1 binding protein 3 [Source:RGD Symbol;Acc:1308924]
0.421798	6.18849	6.18362	1.36534e-05	0.000136628	2.79127	ENSRNOG00000004752	Nalcn	sodium leak channel, non-selective [Source:RGD Symbol;Acc:628710]
-0.729035	9.08792	-6.18124	1.37137e-05	0.000137086	2.71828	ENSRNOG00000008331	Washc4	WASH complex subunit 4 [Source:RGD Symbol;Acc:1309995]
-0.773883	4.32375	-6.17535	1.38643e-05	0.000138462	2.9584	ENSRNOG00000051256	R3hcc1l	R3H domain and coiled-coil containing 1-like [Source:RGD Symbol;Acc:1307934]
0.27015	7.23696	6.1719	1.39533e-05	0.000139221	2.68851	ENSRNOG00000000565	Sgpl1	sphingosine-1-phosphate lyase 1 [Source:RGD Symbol;Acc:628599]
-0.770859	3.10466	-6.17094	1.39781e-05	0.000139339	3.22549	ENSRNOG00000006470	Camk1g	calcium/calmodulin-dependent protein kinase IG [Source:RGD Symbol;Acc:621800]
1.36787	2.53531	6.1691	1.4026e-05	0.000139687	3.38182	ENSRNOG00000033747	Sp110	SP110 nuclear body protein [Source:RGD Symbol;Acc:1310173]
0.718351	2.62131	6.16827	1.40474e-05	0.000139705	3.28539	ENSRNOG00000021704	Atp8b5p	ATPase, class I, type 8B, member 5, pseudogene [Source:RGD Symbol;Acc:1587460]
-0.349859	6.60392	-6.16803	1.40538e-05	0.000139705	2.69195	ENSRNOG00000020860	Tdrkh	tudor and KH domain containing [Source:RGD Symbol;Acc:1311196]
-0.362333	6.37518	-6.16681	1.40855e-05	0.00013989	2.69679	ENSRNOG00000012718	Zfp451	zinc finger protein 451 [Source:RGD Symbol;Acc:1305865]
0.711461	4.13493	6.16361	1.41695e-05	0.000140554	3.08891	ENSRNOG00000003550	Acbd6	acyl-CoA binding domain containing 6 [Source:RGD Symbol;Acc:1305030]
0.689121	4.787	6.16326	1.41786e-05	0.000140554	2.96613	ENSRNOG00000003614	Mgat5	alpha-1,6-mannosylglycoprotein 6-beta-N-acetylglucosaminyltransferase [Source:RGD Symbol;Acc:620100]
0.657477	3.45518	6.16097	1.42392e-05	0.000141024	3.18417	ENSRNOG00000010984	Anxa11	annexin A11 [Source:RGD Symbol;Acc:1309911]
3.04317	0.463928	6.15765	1.43271e-05	0.000141764	1.96011	ENSRNOG00000061650	Cdhr4	cadherin-related family member 4 [Source:RGD Symbol;Acc:1306603]
1.12634	5.00579	6.14912	1.45561e-05	0.000143897	2.95638	ENSRNOG00000003148	NA	NA
0.443286	6.95211	6.14426	1.46881e-05	0.000145064	2.65252	ENSRNOG00000004317	Vipr2	vasoactive intestinal peptide receptor 2 [Source:RGD Symbol;Acc:3962]
-0.508674	4.86151	-6.14378	1.47011e-05	0.000145064	2.7995	ENSRNOG00000009297	Chchd1	coiled-coil-helix-coiled-coil-helix domain containing 1 [Source:RGD Symbol;Acc:1307134]
1.21116	4.80827	6.14232	1.47412e-05	0.00014525	2.97832	ENSRNOG00000003649	Qsox1	quiescin sulfhydryl oxidase 1 [Source:RGD Symbol;Acc:68957]
-0.656299	11.1536	-6.1421	1.47471e-05	0.00014525	2.70248	ENSRNOG00000017816	Pde6a	phosphodiesterase 6A [Source:RGD Symbol;Acc:1306835]
0.499508	3.48329	6.14116	1.47729e-05	0.000145371	3.14252	ENSRNOG00000047473	LOC100909434	protocadherin-16-like [Source:RGD Symbol;Acc:6503563]
0.461277	6.28024	6.13482	1.4948e-05	0.000146959	2.65969	ENSRNOG00000001575	Grik1	glutamate ionotropic receptor kainate type subunit 1 [Source:RGD Symbol;Acc:2732]
-0.534253	5.18968	-6.13239	1.50158e-05	0.000147491	2.77786	ENSRNOG00000009117	Otub2	OTU deubiquitinase, ubiquitin aldehyde binding 2 [Source:RGD Symbol;Acc:1306688]
0.509866	4.40449	6.13063	1.50651e-05	0.000147825	2.92351	ENSRNOG00000020657	Shc1	SHC adaptor protein 1 [Source:RGD Symbol;Acc:620446]
-0.320637	7.77166	-6.13019	1.50774e-05	0.000147825	2.60263	ENSRNOG00000011413	Scp2	sterol carrier protein 2 [Source:RGD Symbol;Acc:3642]
-0.655786	6.00435	-6.12346	1.52676e-05	0.000149552	2.63083	ENSRNOG00000052445	Kdm7a	lysine demethylase 7A [Source:RGD Symbol;Acc:1592650]
1.08944	3.75818	6.12241	1.52974e-05	0.000149708	3.14027	ENSRNOG00000011271	Mcc	MCC regulator of WNT signaling pathway [Source:RGD Symbol;Acc:1561988]
0.80561	3.98161	6.11478	1.55162e-05	0.000151711	3.04547	ENSRNOG00000014452	Zfhx3	zinc finger homeobox 3 [Source:RGD Symbol;Acc:1560268]
0.41614	4.35281	6.11337	1.55571e-05	0.000151973	2.88922	ENSRNOG00000021206	Plaat3	phospholipase A and acyltransferase 3 [Source:RGD Symbol;Acc:2829]
1.23112	3.55037	6.1022	1.58842e-05	0.000155027	3.14706	ENSRNOG00000004332	Egfr	epidermal growth factor receptor [Source:RGD Symbol;Acc:2543]
-0.365794	4.79716	-6.10068	1.59292e-05	0.000155324	2.74281	ENSRNOG00000018491	Chchd5	coiled-coil-helix-coiled-coil-helix domain containing 5 [Source:RGD Symbol;Acc:1307809]
-0.57255	4.97194	-6.09864	1.59899e-05	0.000155775	2.69512	ENSRNOG00000062108	Tomm5	translocase of outer mitochondrial membrane 5 [Source:RGD Symbol;Acc:1596808]
-0.468186	5.08189	-6.09325	1.61517e-05	0.000157208	2.69343	ENSRNOG00000003908	Cep128	centrosomal protein 128 [Source:RGD Symbol;Acc:1595693]
-0.499165	8.29082	-6.0902	1.62439e-05	0.000157962	2.52999	ENSRNOG00000010861	Atad1	ATPase family, AAA domain containing 1 [Source:RGD Symbol;Acc:1308570]
-0.76982	5.98113	-6.08835	1.62999e-05	0.000158363	2.56181	ENSRNOG00000004829	Immp1l	inner mitochondrial membrane peptidase subunit 1 [Source:RGD Symbol;Acc:1587441]
-0.636891	5.80453	-6.08677	1.63481e-05	0.000158688	2.58156	ENSRNOG00000010843	Nhlrc3	NHL repeat containing 3 [Source:RGD Symbol;Acc:1565414]
0.355989	4.88585	6.08599	1.63718e-05	0.000158774	2.73907	ENSRNOG00000026704	Drp2	dystrophin related protein 2 [Source:RGD Symbol;Acc:621750]
0.964889	4.51564	6.07884	1.65919e-05	0.000160763	2.84894	ENSRNOG00000007657	Col27a1	collagen type XXVII alpha 1 chain [Source:RGD Symbol;Acc:735115]
0.44521	7.4631	6.07117	1.68315e-05	0.000162937	2.49559	ENSRNOG00000018566	Ctsl	cathepsin L [Source:RGD Symbol;Acc:2448]
0.712653	3.92165	6.06469	1.70366e-05	0.000164626	2.9175	ENSRNOG00000025781	Sec31b	SEC31 homolog B, COPII coat complex component [Source:RGD Symbol;Acc:1598329]
-0.53457	7.70965	-6.06509	1.70238e-05	0.000164626	2.47685	ENSRNOG00000000585	Amd1	adenosylmethionine decarboxylase 1 [Source:RGD Symbol;Acc:2104]
0.31587	5.08666	6.06325	1.70824e-05	0.000164919	2.67362	ENSRNOG00000008274	Xpc	XPC complex subunit, DNA damage recognition and repair factor [Source:RGD Symbol;Acc:1305760]
-0.576111	5.58609	-6.05926	1.72104e-05	0.000166006	2.57129	ENSRNOG00000027230	Fhod3	formin homology 2 domain containing 3 [Source:RGD Symbol;Acc:2322319]
0.841987	4.30485	6.0576	1.72638e-05	0.000166372	2.8925	ENSRNOG00000012480	Pxylp1	2-phosphoxylose phosphatase 1 [Source:RGD Symbol;Acc:1359617]
0.369163	6.49531	6.05621	1.73089e-05	0.000166656	2.50501	ENSRNOG00000032150	Adcy2	adenylate cyclase 2 [Source:RGD Symbol;Acc:619965]
-0.373698	7.96114	-6.05368	1.7391e-05	0.000167171	2.45649	ENSRNOG00000001064	Sbno1	strawberry notch homolog 1 [Source:RGD Symbol;Acc:1310005]
-0.88813	7.00305	-6.0536	1.73936e-05	0.000167171	2.45539	ENSRNOG00000033133	Nae1	NEDD8 activating enzyme E1 subunit 1 [Source:RGD Symbol;Acc:619945]
2.48413	2.1398	6.05152	1.74615e-05	0.000167674	2.96195	ENSRNOG00000000419	NA	NA
0.286016	6.08715	6.04135	1.77971e-05	0.000170592	2.49948	ENSRNOG00000007686	Septin3	septin 3 [Source:RGD Symbol;Acc:621745]
-0.562915	5.62694	-6.04155	1.77905e-05	0.000170592	2.55439	ENSRNOG00000013774	Lmnb1	lamin B1 [Source:RGD Symbol;Acc:620522]
-0.7864	3.55096	-6.03996	1.78435e-05	0.000170883	2.81751	ENSRNOG00000051669	AABR07040855.1	proteasome 26S subunit, non-ATPase 10 [Source:RGD Symbol;Acc:620350]
-0.376186	5.42681	-6.03835	1.78972e-05	0.000171092	2.54784	ENSRNOG00000001161	NA	NA
-0.63098	4.01951	-6.03844	1.78943e-05	0.000171092	2.7375	ENSRNOG00000038789	Cenpl	centromere protein L [Source:RGD Symbol;Acc:1311868]
0.417172	4.84088	6.03646	1.79608e-05	0.000171395	2.65907	ENSRNOG00000029938	Pik3c2b	phosphatidylinositol-4-phosphate 3-kinase, catalytic subunit type 2 beta [Source:RGD Symbol;Acc:1306541]
-0.762844	9.7347	-6.03692	1.79453e-05	0.000171395	2.45686	ENSRNOG00000012892	Abca4	ATP binding cassette subfamily A member 4 [Source:RGD Symbol;Acc:1309445]
-0.44923	5.72367	-6.03094	1.81476e-05	0.000173023	2.47847	ENSRNOG00000004288	Ptrh2	peptidyl-tRNA hydrolase 2 [Source:RGD Symbol;Acc:1306819]
-0.709813	6.16212	-6.03034	1.81679e-05	0.000173063	2.43556	ENSRNOG00000006114	Cfap69	cilia and flagella associated protein 69 [Source:RGD Symbol;Acc:6496360]
0.392008	7.40259	6.02936	1.82015e-05	0.000173229	2.41627	ENSRNOG00000000902	Hsph1	heat shock protein family H (Hsp110) member 1 [Source:RGD Symbol;Acc:1311609]
1.71653	2.0687	6.0245	1.8368e-05	0.000174659	3.02928	ENSRNOG00000011153	Il17ra	interleukin 17 receptor A [Source:RGD Symbol;Acc:1306559]
0.49724	2.94851	6.01863	1.85714e-05	0.000176436	2.97273	ENSRNOG00000022698	Vsig10	V-set and immunoglobulin domain containing 10 [Source:RGD Symbol;Acc:1565800]
-1.04123	6.8497	-6.01625	1.86542e-05	0.000177066	2.429	ENSRNOG00000017883	Camsap1	calmodulin regulated spectrin-associated protein 1 [Source:RGD Symbol;Acc:1565022]
-0.799487	4.60842	-6.00827	1.89357e-05	0.000179579	2.57442	ENSRNOG00000033740	Lurap1l	leucine rich adaptor protein 1-like [Source:RGD Symbol;Acc:1308059]
-0.518662	5.68057	-6.0025	1.91422e-05	0.000181377	2.44176	ENSRNOG00000050087	Mphosph6	M phase phosphoprotein 6 [Source:RGD Symbol;Acc:1591222]
-0.716757	7.48721	-5.99342	1.94713e-05	0.000184333	2.33766	ENSRNOG00000032825	Rpl30l2	ribosomal protein L30-like 2 [Source:RGD Symbol;Acc:2318953]
-0.74626	6.69409	-5.98584	1.97507e-05	0.000186813	2.33057	ENSRNOG00000017215	RGD1308601	RIKEN cDNA 8030462N17 gene [Source:MGI Symbol;Acc:MGI:2444951]
0.462399	7.21192	5.98342	1.9841e-05	0.000187337	2.33691	ENSRNOG00000006756	Maged1	MAGE family member D1 [Source:RGD Symbol;Acc:70898]
-0.388721	4.58112	-5.98367	1.98314e-05	0.000187337	2.56484	ENSRNOG00000015631	Ippk	inositol-pentakisphosphate 2-kinase [Source:RGD Symbol;Acc:1311271]
0.903312	3.78717	5.97947	1.99887e-05	0.000188565	2.71885	ENSRNOG00000017874	Cd53	Cd53 molecule [Source:RGD Symbol;Acc:2310]
-0.51428	6.39369	-5.97687	2.0087e-05	0.000189326	2.3548	ENSRNOG00000005138	Pip4k2c	phosphatidylinositol-5-phosphate 4-kinase type 2 gamma [Source:RGD Symbol;Acc:621711]
-0.423257	5.30746	-5.97597	2.01208e-05	0.000189459	2.43107	ENSRNOG00000039829	Rpp14	ribonuclease P/MRP subunit p14 [Source:RGD Symbol;Acc:1305436]
-0.692572	6.2483	-5.97556	2.01364e-05	0.000189459	2.32834	ENSRNOG00000042679	Lcor	ligand dependent nuclear receptor corepressor [Source:RGD Symbol;Acc:1311704]
-0.630469	3.3298	-5.97229	2.02606e-05	0.00019046	2.74336	ENSRNOG00000056654	Dnaaf4	dynein axonemal assembly factor 4 [Source:RGD Symbol;Acc:1549760]
0.793978	2.49623	5.97125	2.03003e-05	0.000190642	3.00289	ENSRNOG00000018359	Smad7	SMAD family member 7 [Source:RGD Symbol;Acc:69314]
0.723492	3.61201	5.97086	2.03155e-05	0.000190642	2.74278	ENSRNOG00000009871	Piwil2	piwi-like RNA-mediated gene silencing 2 [Source:RGD Symbol;Acc:1306964]
0.645601	5.1519	5.96883	2.03929e-05	0.000191201	2.50576	ENSRNOG00000030253	Tafa3	TAFA chemokine like family member 3 [Source:RGD Symbol;Acc:1587462]
-0.581167	3.41188	-5.96559	2.05178e-05	0.000192204	2.78422	ENSRNOG00000021312	Dnaaf5	dynein, axonemal, assembly factor 5 [Source:RGD Symbol;Acc:1566028]
0.796603	4.55183	5.96419	2.05719e-05	0.000192477	2.62988	ENSRNOG00000002807	Septin9	septin 9 [Source:RGD Symbol;Acc:708523]
0.344697	6.03416	5.96391	2.05827e-05	0.000192477	2.35639	ENSRNOG00000015840	Hsd17b4	hydroxysteroid (17-beta) dehydrogenase 4 [Source:RGD Symbol;Acc:621806]
1.37237	3.83657	5.96068	2.07084e-05	0.000193351	2.87371	ENSRNOG00000014963	Adgrg1	adhesion G protein-coupled receptor G1 [Source:RGD Symbol;Acc:628617]
1.29213	2.5633	5.96012	2.07304e-05	0.000193351	3.00161	ENSRNOG00000028801	Gsap	gamma-secretase activating protein [Source:RGD Symbol;Acc:1563271]
-0.385416	8.31525	-5.96042	2.07187e-05	0.000193351	2.27959	ENSRNOG00000010601	Srpk2	SRSF protein kinase 2 [Source:RGD Symbol;Acc:1305107]
1.66811	1.57026	5.95953	2.07534e-05	0.000193398	2.95999	ENSRNOG00000042477	Clrn1	clarin 1 [Source:RGD Symbol;Acc:628779]
0.325152	7.11129	5.95598	2.08925e-05	0.000194525	2.28358	ENSRNOG00000005291	Slc38a1	solute carrier family 38, member 1 [Source:RGD Symbol;Acc:69645]
2.10195	2.38124	5.94946	2.11512e-05	0.000196685	2.94158	ENSRNOG00000011821	S100a4	S100 calcium-binding protein A4 [Source:RGD Symbol;Acc:3245]
-0.605432	6.08442	-5.9492	2.11612e-05	0.000196685	2.28958	ENSRNOG00000014148	Ap5m1	adaptor related protein complex 5 subunit mu 1 [Source:RGD Symbol;Acc:1308087]
0.229875	6.66254	5.94695	2.12513e-05	0.000197352	2.2752	ENSRNOG00000020430	Wdr11	WD repeat domain 11 [Source:RGD Symbol;Acc:1587347]
-0.576866	6.01806	-5.94528	2.13182e-05	0.000197802	2.28883	ENSRNOG00000010523	Naa20	N(alpha)-acetyltransferase 20, NatB catalytic subunit [Source:RGD Symbol;Acc:1307713]
-0.39355	6.62839	-5.94236	2.1436e-05	0.000198723	2.25187	ENSRNOG00000033973	Ccdc177	coiled-coil domain containing 177 [Source:RGD Symbol;Acc:1561115]
-0.775171	2.27907	-5.94022	2.15229e-05	0.000199357	2.90154	ENSRNOG00000004566	Arhgef15	Rho guanine nucleotide exchange factor 15 [Source:RGD Symbol;Acc:1306961]
0.3647	4.95239	5.93306	2.18157e-05	0.000201894	2.45848	ENSRNOG00000010534	Ankrd50	ankyrin repeat domain containing 50 [Source:RGD Symbol;Acc:1311665]
0.345917	7.6638	5.93194	2.18615e-05	0.000202138	2.22127	ENSRNOG00000005796	Ctnna1	catenin alpha 1 [Source:RGD Symbol;Acc:1359485]
-0.456086	6.31246	-5.9315	2.18798e-05	0.000202138	2.24539	ENSRNOG00000050343	Jmy	junction mediating and regulatory protein, p53 cofactor [Source:RGD Symbol;Acc:1585601]
-0.56334	3.79349	-5.93086	2.19063e-05	0.000202209	2.57989	ENSRNOG00000018782	Gmnn	geminin, DNA replication inhibitor [Source:RGD Symbol;Acc:1308137]
2.01237	4.11857	5.92561	2.21247e-05	0.000204049	2.847	ENSRNOG00000016687	Ssc5d	scavenger receptor cysteine rich family member with 5 domains [Source:RGD Symbol;Acc:1565772]
-0.466225	9.32402	-5.92492	2.21535e-05	0.00020414	2.22799	ENSRNOG00000056186	NA	NA
-0.304103	6.40337	-5.9196	2.23771e-05	0.00020567	2.22275	ENSRNOG00000000581	Cdc40	cell division cycle 40 [Source:RGD Symbol;Acc:1307063]
-0.310031	7.31554	-5.91972	2.23722e-05	0.00020567	2.1982	ENSRNOG00000054446	Sltm	SAFB-like, transcription modulator [Source:RGD Symbol;Acc:1307526]
-0.629535	6.20815	-5.91975	2.23708e-05	0.00020567	2.22254	ENSRNOG00000015140	Trmt13	tRNA methyltransferase 13 homolog [Source:RGD Symbol;Acc:1565211]
-0.313689	6.19678	-5.9165	2.25087e-05	0.000206349	2.23132	ENSRNOG00000016105	Xrcc5	X-ray repair cross complementing 5 [Source:RGD Symbol;Acc:3976]
-0.450929	5.43206	-5.91732	2.24738e-05	0.000206349	2.2968	ENSRNOG00000039848	Taf9	TATA-box binding protein associated factor 9 [Source:RGD Symbol;Acc:727861]
-0.921084	9.14244	-5.91605	2.25279e-05	0.000206349	2.20968	ENSRNOG00000006380	Srsf6	serine and arginine rich splicing factor 6 [Source:RGD Symbol;Acc:1359241]
-1.22614	6.88533	-5.91645	2.25108e-05	0.000206349	2.24917	ENSRNOG00000018430	Grk1	G protein-coupled receptor kinase 1 [Source:RGD Symbol;Acc:619712]
0.5726	3.32547	5.91457	2.25907e-05	0.000206442	2.74421	ENSRNOG00000031397	Stk32b	serine/threonine kinase 32B [Source:RGD Symbol;Acc:1306173]
-0.395635	5.03102	-5.9151	2.25684e-05	0.000206442	2.37398	ENSRNOG00000014935	Twnk	twinkle mtDNA helicase [Source:RGD Symbol;Acc:1307884]
-0.844327	7.62567	-5.91445	2.25958e-05	0.000206442	2.18513	ENSRNOG00000056940	Cited2	Cbp/p300-interacting transactivator, with Glu/Asp-rich carboxy-terminal domain, 2 [Source:RGD Symbol;Acc:620112]
5.17501	-0.892178	5.90991	2.27909e-05	0.000208047	-0.854959	ENSRNOG00000030729	NA	NA
0.806685	5.42306	5.90938	2.28136e-05	0.000208077	2.39612	ENSRNOG00000005332	Csdc2	cold shock domain containing C2 [Source:RGD Symbol;Acc:628780]
0.843568	5.57047	5.90045	2.32019e-05	0.000211433	2.32165	ENSRNOG00000003289	Lap3	leucine aminopeptidase 3 [Source:RGD Symbol;Acc:1307985]
-0.501875	5.66648	-5.90002	2.3221e-05	0.000211433	2.23655	ENSRNOG00000055292	LOC120102832	RNA-binding protein 12B-A-like [Source:RGD Symbol;Acc:41100894]
-0.355653	6.29921	-5.89939	2.32487e-05	0.000211506	2.19264	ENSRNOG00000004035	Krr1	KRR1, small subunit processome component homolog [Source:RGD Symbol;Acc:1306183]
1.58828	2.99419	5.89681	2.33624e-05	0.000212193	2.88283	ENSRNOG00000018509	Cx3cr1	C-X3-C motif chemokine receptor 1 [Source:RGD Symbol;Acc:620137]
-1.11618	3.27421	-5.89678	2.33637e-05	0.000212193	2.62395	ENSRNOG00000015813	Ubr2	ubiquitin protein ligase E3 component n-recognin 2 [Source:RGD Symbol;Acc:1593237]
-0.357962	5.33476	-5.8905	2.36431e-05	0.000214367	2.2599	ENSRNOG00000049686	Mrpl40	mitochondrial ribosomal protein L40 [Source:RGD Symbol;Acc:1565444]
-0.941678	7.31966	-5.89065	2.36365e-05	0.000214367	2.13812	ENSRNOG00000029956	Zfp654	zinc finger protein 654 [Source:RGD Symbol;Acc:1308321]
-1.18284	2.15442	-5.88952	2.36871e-05	0.000214585	2.88165	ENSRNOG00000033520	Wdr97	WD repeat domain 97 [Source:RGD Symbol;Acc:1562063]
0.343031	7.225	5.88572	2.38582e-05	0.000215769	2.13666	ENSRNOG00000047574	Nrxn3	neurexin 3 [Source:RGD Symbol;Acc:620212]
-0.539967	5.82604	-5.88591	2.38495e-05	0.000215769	2.18457	ENSRNOG00000020605	Pstk	phosphoseryl-tRNA kinase [Source:RGD Symbol;Acc:1564300]
-0.601578	3.36003	-5.883	2.39812e-05	0.0002167	2.57309	ENSRNOG00000027511	RGD1562272	similar to TAF11 RNA polymerase II, TATA box binding protein (TBP)-associated factor [Source:RGD Symbol;Acc:1562272]
-0.495968	8.29818	-5.88007	2.4115e-05	0.000217725	2.12318	ENSRNOG00000052664	Tnks2	tankyrase 2 [Source:RGD Symbol;Acc:1305026]
0.724637	3.55984	5.87779	2.42193e-05	0.000218482	2.64094	ENSRNOG00000010381	Mknk1	MAPK interacting serine/threonine kinase 1 [Source:RGD Symbol;Acc:1559603]
-0.646312	8.25315	-5.87649	2.4279e-05	0.000218838	2.11628	ENSRNOG00000004093	Rhot1	ras homolog family member T1 [Source:RGD Symbol;Acc:1307023]
-0.715436	9.84282	-5.87489	2.43526e-05	0.000219316	2.14475	ENSRNOG00000003256	Ccng1	cyclin G1 [Source:RGD Symbol;Acc:2295]
-0.626192	7.19054	-5.86826	2.46605e-05	0.000221903	2.09493	ENSRNOG00000052469	Bmpr1a	bone morphogenetic protein receptor type 1A [Source:RGD Symbol;Acc:70989]
-0.545949	5.72746	-5.86605	2.47642e-05	0.000222649	2.20383	ENSRNOG00000052704	Dnah10	dynein, axonemal, heavy chain 10 [Source:RGD Symbol;Acc:619988]
-0.344485	5.58399	-5.86342	2.48881e-05	0.000223576	2.1851	ENSRNOG00000047896	Kctd10	potassium channel tetramerization domain containing 10 [Source:RGD Symbol;Acc:1591979]
0.620275	8.30006	5.86159	2.49747e-05	0.000224166	2.08679	ENSRNOG00000002418	Tgfb2	transforming growth factor, beta 2 [Source:RGD Symbol;Acc:70491]
-0.307497	9.48909	-5.86099	2.50028e-05	0.000224231	2.10624	ENSRNOG00000058249	Pgk1	phosphoglycerate kinase 1 [Source:RGD Symbol;Acc:619878]
0.364359	4.20906	5.85851	2.51211e-05	0.000225104	2.39725	ENSRNOG00000022636	Alpk1	alpha-kinase 1 [Source:RGD Symbol;Acc:1304613]
1.69913	2.50465	5.85662	2.52111e-05	0.000225722	2.80262	ENSRNOG00000021412	Slfn13	schlafen family member 13 [Source:RGD Symbol;Acc:1359139]
-0.592248	4.43261	-5.85333	2.53692e-05	0.000226948	2.36781	ENSRNOG00000000245	Slc16a6	solute carrier family 16, member 6 [Source:RGD Symbol;Acc:735117]
0.452116	5.62085	5.84281	2.5881e-05	0.000231333	2.20231	ENSRNOG00000014135	Rab11fip4	RAB11 family interacting protein 4 [Source:RGD Symbol;Acc:1305063]
0.37864	7.37444	5.84057	2.59914e-05	0.000231994	2.05267	ENSRNOG00000026787	Disp2	dispatched RND transporter family member 2 [Source:RGD Symbol;Acc:1309569]
-0.329114	5.28787	-5.84043	2.59982e-05	0.000231994	2.1806	ENSRNOG00000018128	Unc50	unc-50 inner nuclear membrane RNA binding protein [Source:RGD Symbol;Acc:621749]
-0.284397	6.30921	-5.83939	2.60497e-05	0.000232067	2.07149	ENSRNOG00000010099	Asb8	ankyrin repeat and SOCS box-containing 8 [Source:RGD Symbol;Acc:1309246]
-0.746495	9.39249	-5.83952	2.6043e-05	0.000232067	2.06519	ENSRNOG00000056458	Cep290	centrosomal protein 290 [Source:RGD Symbol;Acc:1311640]
-0.538108	6.72651	-5.83765	2.61358e-05	0.000232641	2.04253	ENSRNOG00000015274	Ddx20	DEAD-box helicase 20 [Source:RGD Symbol;Acc:621744]
-0.862261	2.07366	-5.83601	2.62174e-05	0.000233174	2.70999	ENSRNOG00000022511	Tgap1	GTPase activating protein testicular GAP1 [Source:RGD Symbol;Acc:1359558]
-0.610312	6.78972	-5.83159	2.64388e-05	0.000234948	2.02825	ENSRNOG00000025701	Nifk	nucleolar protein interacting with the FHA domain of MKI67 [Source:RGD Symbol;Acc:708462]
1.09562	3.82179	5.82993	2.65224e-05	0.000235496	2.42225	ENSRNOG00000000195	LOC108348048	von Willebrand factor A domain-containing protein 5A [Source:RGD Symbol;Acc:11476240]
-0.389082	8.91857	-5.82593	2.67246e-05	0.000237095	2.02629	ENSRNOG00000017801	Atf4	activating transcription factor 4 [Source:RGD Symbol;Acc:621863]
-0.540714	5.93295	-5.82449	2.67983e-05	0.000237552	2.05744	ENSRNOG00000010566	Cep44	centrosomal protein 44 [Source:RGD Symbol;Acc:1308517]
0.30729	4.94936	5.82209	2.69207e-05	0.00023844	2.21431	ENSRNOG00000007926	Map2k5	mitogen activated protein kinase kinase 5 [Source:RGD Symbol;Acc:61890]
-0.250663	7.34288	-5.81587	2.72411e-05	0.000241079	1.99516	ENSRNOG00000023760	Plekhm3	pleckstrin homology domain containing M3 [Source:RGD Symbol;Acc:1307151]
0.863471	2.90125	5.81329	2.73752e-05	0.000242067	2.68444	ENSRNOG00000007307	Syde1	synapse defective Rho GTPase homolog 1 [Source:RGD Symbol;Acc:1305857]
-0.779201	2.70742	-5.81284	2.73988e-05	0.000242075	2.61637	ENSRNOG00000006311	Ccr9	C-C motif chemokine receptor 9 [Source:RGD Symbol;Acc:628750]
0.801523	2.63488	5.81107	2.74912e-05	0.000242372	2.62246	ENSRNOG00000019659	Aspa	aspartoacylase [Source:RGD Symbol;Acc:621693]
-0.435846	4.68692	-5.8109	2.75002e-05	0.000242372	2.24214	ENSRNOG00000022455	Cptp	ceramide-1-phosphate transfer protein [Source:RGD Symbol;Acc:1359656]
-0.658492	5.90434	-5.81125	2.74817e-05	0.000242372	2.03005	ENSRNOG00000013692	Abhd18	abhydrolase domain containing 18 [Source:RGD Symbol;Acc:1563987]
-0.52632	7.27928	-5.80795	2.76552e-05	0.000243538	1.97669	ENSRNOG00000059348	Ube2b	ubiquitin-conjugating enzyme E2B [Source:RGD Symbol;Acc:708345]
0.404444	4.87657	5.80535	2.77922e-05	0.000244544	2.18778	ENSRNOG00000028872	Rai14	retinoic acid induced 14 [Source:RGD Symbol;Acc:1305942]
0.875892	2.49709	5.8001	2.80713e-05	0.000246798	2.69172	ENSRNOG00000016758	Loxl2	lysyl oxidase-like 2 [Source:RGD Symbol;Acc:1308435]
-0.569002	6.78802	-5.79875	2.81437e-05	0.000247231	1.96464	ENSRNOG00000025025	Dnttip2	deoxynucleotidyltransferase, terminal, interacting protein 2 [Source:RGD Symbol;Acc:6497192]
-0.592923	8.09794	-5.79731	2.82212e-05	0.000247576	1.96004	ENSRNOG00000008129	Pla2r1	phospholipase A2 receptor 1 [Source:RGD Symbol;Acc:1309777]
-0.99629	8.43675	-5.79716	2.82291e-05	0.000247576	1.96909	ENSRNOG00000015623	Guca1b	guanylate cyclase activator 1B [Source:RGD Symbol;Acc:1308191]
-0.719289	6.83577	-5.79597	2.82933e-05	0.000247937	1.95659	ENSRNOG00000016767	Ggps1	geranylgeranyl diphosphate synthase 1 [Source:RGD Symbol;Acc:1359680]
1.31718	3.05144	5.78509	2.88863e-05	0.000252809	2.62248	ENSRNOG00000005825	Lyz2	lysozyme 2 [Source:RGD Symbol;Acc:3026]
-0.931264	7.19695	-5.78491	2.88965e-05	0.000252809	1.93139	ENSRNOG00000014031	Esco1	establishment of sister chromatid cohesion N-acetyltransferase 1 [Source:RGD Symbol;Acc:1596873]
0.365545	6.16536	5.78202	2.90559e-05	0.00025379	2.00017	ENSRNOG00000006729	Slc24a4	solute carrier family 24 member 4 [Source:RGD Symbol;Acc:1305926]
-0.373019	7.84561	-5.78233	2.90386e-05	0.00025379	1.92806	ENSRNOG00000009381	Mapk6	mitogen-activated protein kinase 6 [Source:RGD Symbol;Acc:62087]
-0.427999	6.14912	-5.78066	2.91314e-05	0.000254242	1.96697	ENSRNOG00000015059	Mcfd2	multiple coagulation factor deficiency 2 [Source:RGD Symbol;Acc:628690]
-0.830734	8.73102	-5.77981	2.91789e-05	0.000254449	1.93431	ENSRNOG00000024647	Ppp4r2	protein phosphatase 4, regulatory subunit 2 [Source:RGD Symbol;Acc:1307312]
0.682481	3.37385	5.77799	2.92801e-05	0.000255124	2.4606	ENSRNOG00000060571	Peds1	plasmanylethanolamine desaturase 1 [Source:RGD Symbol;Acc:1309093]
-0.633323	2.68989	-5.77455	2.94729e-05	0.000256596	2.51825	ENSRNOG00000013596	Dimt1	DIM1 rRNA methyltransferase and ribosome maturation factor [Source:RGD Symbol;Acc:1311752]
1.63865	2.90499	5.77013	2.97226e-05	0.000258351	2.64734	ENSRNOG00000002208	Shroom3	shroom family member 3 [Source:RGD Symbol;Acc:1310470]
-0.652665	6.92396	-5.77055	2.96992e-05	0.000258351	1.90624	ENSRNOG00000000387	Dna2	DNA replication helicase/nuclease 2 [Source:RGD Symbol;Acc:1306791]
-0.306698	6.62782	-5.76958	2.97538e-05	0.000258413	1.92458	ENSRNOG00000004050	Snrk	SNF related kinase [Source:RGD Symbol;Acc:69653]
-0.646135	7.50261	-5.76415	3.00643e-05	0.000260897	1.90146	ENSRNOG00000031773	Cngb1	cyclic nucleotide gated channel subunit beta 1 [Source:RGD Symbol;Acc:621809]
-0.39667	4.47393	-5.76175	3.02024e-05	0.000261885	2.13774	ENSRNOG00000016360	Gps2	G protein pathway suppressor 2 [Source:RGD Symbol;Acc:1562746]
0.3588	4.59556	5.75795	3.04227e-05	0.000263581	2.1553	ENSRNOG00000016246	Tshz1	teashirt zinc finger homeobox 1 [Source:RGD Symbol;Acc:1311684]
0.614429	5.91783	5.75382	3.06636e-05	0.000265454	2.00656	ENSRNOG00000003442	Adora1	adenosine A1 receptor [Source:RGD Symbol;Acc:2048]
0.712054	3.0875	5.74912	3.09401e-05	0.000267632	2.45044	ENSRNOG00000010840	Adamtsl3	ADAMTS-like 3 [Source:RGD Symbol;Acc:1305155]
0.931811	4.90372	5.74462	3.12075e-05	0.000269728	2.06893	ENSRNOG00000013280	Olfm4	olfactomedin 4 [Source:RGD Symbol;Acc:1311708]
0.573411	6.47809	5.74074	3.14402e-05	0.000271301	1.91546	ENSRNOG00000058938	Camkv	CaM kinase-like vesicle-associated [Source:RGD Symbol;Acc:621488]
0.441498	4.66399	5.74113	3.14165e-05	0.000271301	2.1013	ENSRNOG00000001608	Nxpe3	neurexophilin and PC-esterase domain family, member 3 [Source:RGD Symbol;Acc:1584648]
-0.302817	5.86026	-5.73814	3.15972e-05	0.000272437	1.91504	ENSRNOG00000011690	Rmdn3	regulator of microtubule dynamics 3 [Source:RGD Symbol;Acc:1308697]
0.832531	4.54656	5.73203	3.19689e-05	0.000275226	2.1728	ENSRNOG00000060464	Plxna3	plexin A3 [Source:RGD Symbol;Acc:1584973]
-0.467324	5.24513	-5.73197	3.1972e-05	0.000275226	1.98055	ENSRNOG00000007851	Psma3	proteasome 20S subunit alpha 3 [Source:RGD Symbol;Acc:61844]
0.926013	4.19716	5.72933	3.21344e-05	0.000276403	2.15817	ENSRNOG00000042426	Cyp4v3	cytochrome P450, family 4, subfamily v, polypeptide 3 [Source:RGD Symbol;Acc:708530]
3.32122	0.900495	5.72734	3.22567e-05	0.000277232	1.79094	ENSRNOG00000019142	Fas	Fas cell surface death receptor [Source:RGD Symbol;Acc:619831]
-0.565605	6.66564	-5.72688	3.22854e-05	0.000277256	1.82523	ENSRNOG00000003329	Ppm1d	protein phosphatase, Mg2+/Mn2+ dependent, 1D [Source:RGD Symbol;Acc:1305460]
-0.28468	8.30558	-5.72557	3.23664e-05	0.000277729	1.8204	ENSRNOG00000019145	Kdm2a	lysine demethylase 2A [Source:RGD Symbol;Acc:1309419]
-0.437492	6.74348	-5.72461	3.24259e-05	0.000278018	1.82179	ENSRNOG00000022812	Ercc5	ERCC excision repair 5, endonuclease [Source:RGD Symbol;Acc:1586176]
-0.401571	7.34481	-5.72209	3.25831e-05	0.000279143	1.80878	ENSRNOG00000004831	Arid2	AT-rich interaction domain 2 [Source:RGD Symbol;Acc:1311105]
-0.706249	5.38959	-5.72144	3.26236e-05	0.000279266	1.92087	ENSRNOG00000012951	Kctd9	potassium channel tetramerization domain containing 9 [Source:RGD Symbol;Acc:1312010]
0.493893	7.70436	5.7172	3.28899e-05	0.000281321	1.80836	ENSRNOG00000012950	Efr3b	EFR3 homolog B [Source:RGD Symbol;Acc:1310845]
-0.445423	4.38684	-5.71588	3.29732e-05	0.000281809	2.07688	ENSRNOG00000013589	Cxcl12	C-X-C motif chemokine ligand 12 [Source:RGD Symbol;Acc:3651]
-0.728888	5.59935	-5.71252	3.31857e-05	0.000283399	1.89638	ENSRNOG00000057924	Or2a52	olfactory receptor family 2 subfamily A member 52 [Source:RGD Symbol;Acc:1587195]
-0.384328	5.9763	-5.70747	3.35086e-05	0.000285929	1.83305	ENSRNOG00000004301	Dcaf13	DDB1 and CUL4 associated factor 13 [Source:RGD Symbol;Acc:1308458]
1.01789	4.29214	5.70555	3.36325e-05	0.000286687	2.24313	ENSRNOG00000003517	Tbx2	T-box transcription factor 2 [Source:RGD Symbol;Acc:1311014]
0.254369	7.83129	5.70526	3.36509e-05	0.000286687	1.7779	ENSRNOG00000001227	Adarb1	adenosine deaminase, RNA-specific, B1 [Source:RGD Symbol;Acc:2033]
-0.271891	6.62966	-5.69886	3.4067e-05	0.000290002	1.78879	ENSRNOG00000054725	Gtf3c4	general transcription factor IIIC subunit 4 [Source:RGD Symbol;Acc:1592609]
0.590345	4.13038	5.69824	3.41074e-05	0.000290116	2.16608	ENSRNOG00000000599	Lama4	laminin subunit alpha 4 [Source:RGD Symbol;Acc:1560062]
-0.328182	5.73049	-5.69663	3.42128e-05	0.000290782	1.85023	ENSRNOG00000011696	Lifr	LIF receptor subunit alpha [Source:RGD Symbol;Acc:621431]
1.90205	1.31664	5.69333	3.44305e-05	0.0002924	2.40079	ENSRNOG00000033697	Casp4	caspase 4 [Source:RGD Symbol;Acc:621757]
0.438287	7.58986	5.69147	3.45537e-05	0.000293214	1.75986	ENSRNOG00000025235	Tmem130	transmembrane protein 130 [Source:RGD Symbol;Acc:1563248]
-0.349004	4.70582	-5.68498	3.49865e-05	0.000296653	1.95238	ENSRNOG00000048708	Exosc1	exosome component 1 [Source:RGD Symbol;Acc:1591855]
-0.466825	4.60683	-5.68362	3.50784e-05	0.000297196	1.97065	ENSRNOG00000024066	Fundc2	FUN14 domain containing 2 [Source:RGD Symbol;Acc:1560916]
-0.314949	7.46275	-5.68225	3.5171e-05	0.000297746	1.73038	ENSRNOG00000000923	Cct6a	chaperonin containing TCP1 subunit 6A [Source:RGD Symbol;Acc:1304763]
-0.490366	4.88048	-5.68178	3.52025e-05	0.000297778	1.92184	ENSRNOG00000048138	Zfp566	zinc finger protein 566 [Source:RGD Symbol;Acc:1563239]
-0.355981	6.00472	-5.67918	3.5379e-05	0.000299035	1.78097	ENSRNOG00000019749	Ube2j2	ubiquitin-conjugating enzyme E2, J2 [Source:RGD Symbol;Acc:1359523]
-0.628846	6.45158	-5.67812	3.54507e-05	0.000299373	1.73648	ENSRNOG00000015818	NA	NA
-0.68057	3.12681	-5.67777	3.54748e-05	0.000299373	2.22319	ENSRNOG00000049913	NA	NA
1.16501	1.80572	5.67631	3.55741e-05	0.000299975	2.5011	ENSRNOG00000025641	Gml	glycosylphosphatidylinositol anchored molecule like [Source:RGD Symbol;Acc:1307850]
-0.549798	6.89477	-5.67341	3.5773e-05	0.000301415	1.72054	ENSRNOG00000002904	Arr3	arrestin 3 [Source:RGD Symbol;Acc:621385]
-0.528984	6.02755	-5.66781	3.61606e-05	0.000304442	1.74383	ENSRNOG00000055093	Cep43	centrosomal protein 43 [Source:RGD Symbol;Acc:1583370]
1.40517	2.14568	5.66502	3.63547e-05	0.000305835	2.47109	ENSRNOG00000012881	Fgl2	fibrinogen-like 2 [Source:RGD Symbol;Acc:620170]
0.4219	4.30309	5.66418	3.6414e-05	0.000306094	2.04619	ENSRNOG00000008061	Nuak1	NUAK family kinase 1 [Source:RGD Symbol;Acc:1309956]
-0.558736	4.65802	-5.66167	3.659e-05	0.000307333	1.95338	ENSRNOG00000010386	H2ax	H2A.X variant histone [Source:RGD Symbol;Acc:1566119]
-0.436915	6.5026	-5.65902	3.67767e-05	0.000308659	1.70169	ENSRNOG00000010482	Impa1	inositol monophosphatase 1 [Source:RGD Symbol;Acc:69254]
0.273454	5.29148	5.6582	3.68351e-05	0.000308908	1.85107	ENSRNOG00000017635	Inpp5a	inositol polyphosphate-5-phosphatase A [Source:RGD Symbol;Acc:1306168]
-0.341981	4.55946	-5.65463	3.70889e-05	0.000310793	1.94306	ENSRNOG00000002926	Uap1	UDP-N-acetylglucosamine pyrophosphorylase 1 [Source:RGD Symbol;Acc:1561967]
-0.81011	4.46702	-5.65079	3.73638e-05	0.000312853	1.89336	ENSRNOG00000030131	Zscan30	zinc finger and SCAN domain containing 30 [Source:RGD Symbol;Acc:1306095]
0.395754	6.45652	5.64872	3.75131e-05	0.000313858	1.70514	ENSRNOG00000011015	Hivep2	HIVEP zinc finger 2 [Source:RGD Symbol;Acc:61988]
-0.54976	6.3589	-5.64639	3.76817e-05	0.000315022	1.67841	ENSRNOG00000015585	Suv39h2	SUV39H2 histone lysine methyltransferase [Source:RGD Symbol;Acc:1306969]
-0.282065	4.84919	-5.64577	3.77271e-05	0.000315157	1.85441	ENSRNOG00000009742	Rad52	RAD52 homolog, DNA repair protein [Source:RGD Symbol;Acc:1304975]
0.700049	3.15669	5.64295	3.79322e-05	0.000316623	2.31181	ENSRNOG00000016752	Crispld2	cysteine-rich secretory protein LCCL domain containing 2 [Source:RGD Symbol;Acc:620860]
1.2411	3.62866	5.63906	3.82181e-05	0.000318761	2.31222	ENSRNOG00000012053	S100a16	S100 calcium binding protein A16 [Source:RGD Symbol;Acc:1306770]
0.322474	5.1379	5.63597	3.84459e-05	0.000320412	1.80908	ENSRNOG00000012074	Ifngr1	interferon gamma receptor 1 [Source:RGD Symbol;Acc:620570]
0.418607	6.45314	5.6354	3.8488e-05	0.000320514	1.67437	ENSRNOG00000014678	Fzd5	frizzled class receptor 5 [Source:RGD Symbol;Acc:631406]
0.550281	7.27421	5.63492	3.85241e-05	0.000320566	1.66187	ENSRNOG00000019317	Cplx3	complexin 3 [Source:RGD Symbol;Acc:1560104]
-0.335494	6.62098	-5.63433	3.85678e-05	0.00032068	1.65721	ENSRNOG00000014209	Utp6	UTP6 small subunit processome component [Source:RGD Symbol;Acc:1311017]
-0.892423	3.96715	-5.63257	3.86986e-05	0.000321519	1.94119	ENSRNOG00000021918	Cep76	centrosomal protein 76 [Source:RGD Symbol;Acc:1305183]
-0.379918	4.9453	-5.62978	3.89075e-05	0.000322755	1.80743	ENSRNOG00000011382	Wdr33	WD repeat domain 33 [Source:RGD Symbol;Acc:1309230]
-0.418919	6.16913	-5.63007	3.88857e-05	0.000322755	1.65911	ENSRNOG00000051258	NA	NA
-0.619693	4.35009	-5.629	3.89657e-05	0.000322988	1.88718	ENSRNOG00000011663	Rnf7	ring finger protein 7 [Source:RGD Symbol;Acc:1311048]
-0.337052	6.18954	-5.628	3.90414e-05	0.000323365	1.65974	ENSRNOG00000003980	Ttc1	tetratricopeptide repeat domain 1 [Source:RGD Symbol;Acc:1359604]
0.444898	4.97159	5.6255	3.92298e-05	0.000324425	1.85116	ENSRNOG00000004353	Ppfia2	PTPRF interacting protein alpha 2 [Source:RGD Symbol;Acc:1305021]
-0.751427	2.46045	-5.62577	3.92092e-05	0.000324425	2.32433	ENSRNOG00000053675	Dhh	desert hedgehog signaling molecule [Source:RGD Symbol;Acc:620711]
0.330755	6.51637	5.62421	3.93273e-05	0.000324981	1.66203	ENSRNOG00000011421	Smap2	small ArfGAP2 [Source:RGD Symbol;Acc:1308418]
0.533915	6.58713	5.62026	3.96285e-05	0.000327218	1.67605	ENSRNOG00000020937	Ubtf	upstream binding transcription factor [Source:RGD Symbol;Acc:3927]
-0.471485	7.16309	-5.61973	3.96688e-05	0.000327298	1.60684	ENSRNOG00000022202	Trappc8	trafficking protein particle complex subunit 8 [Source:RGD Symbol;Acc:1309102]
0.703324	4.65897	5.61644	3.99214e-05	0.000327919	1.89562	ENSRNOG00000027220	NA	NA
0.44275	3.60804	5.61791	3.98085e-05	0.000327919	2.06017	ENSRNOG00000005993	Oxsm	3-oxoacyl-ACP synthase, mitochondrial [Source:RGD Symbol;Acc:1311092]
-0.270398	6.78737	-5.61599	3.99563e-05	0.000327919	1.60913	ENSRNOG00000010676	Smarce1	SWI/SNF related, matrix associated, actin dependent regulator of chromatin, subfamily e, member 1 [Source:RGD Symbol;Acc:1304726]
-0.280077	7.37031	-5.61596	3.99581e-05	0.000327919	1.60212	ENSRNOG00000007128	Nop56	NOP56 ribonucleoprotein [Source:RGD Symbol;Acc:1308892]
-0.345225	4.5435	-5.61635	3.99281e-05	0.000327919	1.86224	ENSRNOG00000018766	Rrp8	ribosomal RNA processing 8 [Source:RGD Symbol;Acc:1308302]
-0.411688	6.61399	-5.6178	3.98165e-05	0.000327919	1.61584	ENSRNOG00000032297	Msmo1	methylsterol monooxygenase 1 [Source:RGD Symbol;Acc:620281]
-1.07534	3.43952	-5.61611	3.99471e-05	0.000327919	2.0687	ENSRNOG00000000572	Chst3	carbohydrate sulfotransferase 3 [Source:RGD Symbol;Acc:620355]
-0.738569	5.60134	-5.61365	4.01366e-05	0.000329133	1.66709	ENSRNOG00000013390	Kbtbd8	kelch repeat and BTB domain containing 8 [Source:RGD Symbol;Acc:1563166]
-0.667241	4.56014	-5.60878	4.05158e-05	0.000331988	1.7996	ENSRNOG00000050645	Tprkb	Tp53rk binding protein [Source:RGD Symbol;Acc:1309786]
-0.734143	6.02651	-5.6076	4.06085e-05	0.000332494	1.61771	ENSRNOG00000026610	Akirin1	akirin 1 [Source:RGD Symbol;Acc:1585989]
0.482938	3.22818	5.60718	4.06413e-05	0.000332509	2.14189	ENSRNOG00000020073	Pcdhb8	protocadherin beta 8 [Source:RGD Symbol;Acc:1309895]
-0.599551	5.40977	-5.60591	4.07412e-05	0.000333072	1.67338	ENSRNOG00000013322	Pola1	DNA polymerase alpha 1, catalytic subunit [Source:RGD Symbol;Acc:621816]
0.352159	4.91873	5.60273	4.0992e-05	0.000334867	1.80313	ENSRNOG00000016932	Simc1	SUMO-interacting motifs containing 1 [Source:RGD Symbol;Acc:2319689]
0.721294	5.23898	5.60109	4.11224e-05	0.000335677	1.73061	ENSRNOG00000005956	Erich5	glutamate-rich 5 [Source:RGD Symbol;Acc:1590540]
0.560403	3.12109	5.60062	4.11592e-05	0.000335721	2.19742	ENSRNOG00000006278	Tspyl5	TSPY-like 5 [Source:RGD Symbol;Acc:1311262]
0.725431	4.39671	5.59989	4.12171e-05	0.000335938	1.89679	ENSRNOG00000027002	Mast4	microtubule associated serine/threonine kinase family member 4 [Source:RGD Symbol;Acc:1310139]
-0.433709	7.12004	-5.5982	4.13527e-05	0.000336787	1.56505	ENSRNOG00000011222	Dynll1	dynein light chain LC8-type 1 [Source:RGD Symbol;Acc:619866]
0.640243	3.43969	5.59411	4.16807e-05	0.000338722	2.07988	ENSRNOG00000005058	Lpcat4	lysophosphatidylcholine acyltransferase 4 [Source:RGD Symbol;Acc:1311177]
0.44133	6.91457	5.59405	4.16849e-05	0.000338722	1.56624	ENSRNOG00000021984	Rgs7	regulator of G-protein signaling 7 [Source:RGD Symbol;Acc:3570]
-0.274023	7.16962	-5.59428	4.16666e-05	0.000338722	1.56028	ENSRNOG00000045918	Jarid2	jumonji and AT-rich interaction domain containing 2 [Source:RGD Symbol;Acc:1591663]
0.554987	4.91156	5.59354	4.17263e-05	0.000338801	1.7731	ENSRNOG00000042478	Adam22	ADAM metallopeptidase domain 22 [Source:RGD Symbol;Acc:1585016]
-0.244421	7.07348	-5.59285	4.17819e-05	0.000338996	1.55853	ENSRNOG00000003496	Tbc1d9	TBC1 domain family member 9 [Source:RGD Symbol;Acc:1308221]
-0.477321	6.92714	-5.59222	4.18332e-05	0.000339155	1.55432	ENSRNOG00000016447	RGD1310553	similar to expressed sequence AI597479 [Source:RGD Symbol;Acc:1310553]
0.268114	5.84724	5.59109	4.19242e-05	0.000339637	1.63946	ENSRNOG00000026050	Epb41l4a	erythrocyte membrane protein band 4.1 like 4A [Source:RGD Symbol;Acc:1306034]
0.970544	2.41534	5.58969	4.20382e-05	0.000340303	2.26633	ENSRNOG00000022320	Primpol	primase and DNA directed polymerase [Source:RGD Symbol;Acc:1562119]
-0.544578	5.59726	-5.58886	4.21052e-05	0.000340589	1.62798	ENSRNOG00000009296	Snapc1	small nuclear RNA activating complex, polypeptide 1 [Source:RGD Symbol;Acc:1304671]
0.5819	3.73173	5.58529	4.23971e-05	0.000342463	2.0187	ENSRNOG00000021176	Mtmr11	myotubularin related protein 11 [Source:RGD Symbol;Acc:1589965]
0.491877	5.41047	5.58525	4.24007e-05	0.000342463	1.72681	ENSRNOG00000050994	Cttn	cortactin [Source:RGD Symbol;Acc:619839]
-0.602884	4.60682	-5.58434	4.2475e-05	0.000342805	1.77515	ENSRNOG00000008752	Nrf1	nuclear respiratory factor 1 [Source:RGD Symbol;Acc:1304603]
-0.303032	7.62367	-5.5836	4.2536e-05	0.00034293	1.53485	ENSRNOG00000017758	Ns5atp4	NS5A transactivated protein 4 [Source:RGD Symbol;Acc:1359625]
-0.705898	6.70089	-5.58337	4.25545e-05	0.00034293	1.53939	ENSRNOG00000033346	LOC100361636	vasculin-like protein 1-like [Source:RGD Symbol;Acc:2319736]
-0.359668	6.05248	-5.57529	4.32249e-05	0.000348071	1.57855	ENSRNOG00000011379	Ccndbp1	cyclin D1 binding protein 1 [Source:RGD Symbol;Acc:1304669]
0.547144	4.37071	5.57321	4.33993e-05	0.000349213	1.8528	ENSRNOG00000052219	Gm2a	ganglioside GM2 activator [Source:RGD Symbol;Acc:628651]
0.478022	3.99553	5.57265	4.34468e-05	0.000349333	1.90407	ENSRNOG00000022598	Trerf1	transcriptional regulating factor 1 [Source:RGD Symbol;Acc:1307167]
0.477136	4.8999	5.56421	4.41623e-05	0.000354554	1.76546	ENSRNOG00000056697	Kcnab1	potassium voltage-gated channel subfamily A regulatory beta subunit 1 [Source:RGD Symbol;Acc:61827]
-1.02487	1.99159	-5.56434	4.41513e-05	0.000354554	2.21621	ENSRNOG00000023026	Fbxo48	F-box protein 48 [Source:RGD Symbol;Acc:1309073]
0.362224	8.24918	5.56379	4.41985e-05	0.000354579	1.50134	ENSRNOG00000005299	Kif5a	kinesin family member 5A [Source:RGD Symbol;Acc:1303035]
-1.68558	2.64339	-5.56284	4.42796e-05	0.000354965	2.09882	ENSRNOG00000012396	Rgr	retinal G protein coupled receptor [Source:RGD Symbol;Acc:1309174]
0.956262	2.93906	5.5581	4.46877e-05	0.000357969	2.20485	ENSRNOG00000026585	Lrrc66	leucine rich repeat containing 66 [Source:RGD Symbol;Acc:1306094]
-0.328909	6.77352	-5.55497	4.496e-05	0.000359396	1.48898	ENSRNOG00000007047	Eps8	epidermal growth factor receptor pathway substrate 8 [Source:RGD Symbol;Acc:1310590]
-0.469776	8.84982	-5.55489	4.49664e-05	0.000359396	1.49064	ENSRNOG00000034037	Zfp266	zinc finger protein 266 [Source:RGD Symbol;Acc:1308643]
-0.632803	6.65415	-5.55508	4.49503e-05	0.000359396	1.48501	ENSRNOG00000007735	Pigm	phosphatidylinositol glycan anchor biosynthesis, class M [Source:RGD Symbol;Acc:71041]
-0.579717	8.26008	-5.55127	4.52836e-05	0.000361393	1.47544	ENSRNOG00000016971	Zfp612	zinc finger protein 612 [Source:RGD Symbol;Acc:1307197]
-0.769707	5.44707	-5.55157	4.52573e-05	0.000361393	1.56338	ENSRNOG00000009176	Mkrn2	makorin, ring finger protein, 2 [Source:RGD Symbol;Acc:1310618]
0.352582	6.57257	5.55032	4.5367e-05	0.000361789	1.50595	ENSRNOG00000013186	G3bp1	G3BP stress granule assembly factor 1 [Source:RGD Symbol;Acc:621140]
-0.756922	2.22558	-5.5489	4.54913e-05	0.000362511	2.22711	ENSRNOG00000017975	Dnajb13	DnaJ heat shock protein family (Hsp40) member B13 [Source:RGD Symbol;Acc:1359131]
0.302042	6.46316	5.54772	4.55955e-05	0.000363072	1.49853	ENSRNOG00000017911	Tcaf1	TRPM8 channel-associated factor 1 [Source:RGD Symbol;Acc:1565474]
0.597206	3.27466	5.54698	4.56617e-05	0.000363329	2.01151	ENSRNOG00000004821	Sntb1	syntrophin, beta 1 [Source:RGD Symbol;Acc:1307728]
0.743807	5.1118	5.54318	4.59987e-05	0.000365638	1.64142	ENSRNOG00000042224	Cyp2j10	cytochrome P450, family 2, subfamily j, polypeptide 10 [Source:RGD Symbol;Acc:1563215]
0.440402	6.0309	5.54294	4.602e-05	0.000365638	1.53922	ENSRNOG00000001065	Cyth3	cytohesin 3 [Source:RGD Symbol;Acc:620399]
-0.267511	7.68345	-5.54221	4.60857e-05	0.000365888	1.45285	ENSRNOG00000006559	Akap8	A-kinase anchoring protein 8 [Source:RGD Symbol;Acc:620832]
-0.604566	5.88863	-5.54124	4.61724e-05	0.000366306	1.49585	ENSRNOG00000010397	Agbl3	AGBL carboxypeptidase 3 [Source:RGD Symbol;Acc:1561995]
-0.607045	6.23715	-5.53608	4.66368e-05	0.000369717	1.46422	ENSRNOG00000006261	Papolg	poly(A) polymerase gamma [Source:RGD Symbol;Acc:1310337]
-0.479314	6.86356	-5.53484	4.67493e-05	0.000370335	1.44329	ENSRNOG00000034078	Mxi1	MAX interactor 1, dimerization protein [Source:RGD Symbol;Acc:3128]
-0.772073	8.10415	-5.52734	4.74341e-05	0.000375482	1.42908	ENSRNOG00000003738	Ush2a	usherin [Source:RGD Symbol;Acc:628777]
-0.448337	6.64649	-5.52607	4.75515e-05	0.000375856	1.43084	ENSRNOG00000014493	Golga1	golgin A1 [Source:RGD Symbol;Acc:1311305]
-0.449915	5.9029	-5.52629	4.75309e-05	0.000375856	1.47409	ENSRNOG00000010608	Cep162	centrosomal protein 162 [Source:RGD Symbol;Acc:1307365]
-0.231174	6.41781	-5.52119	4.80041e-05	0.000379155	1.44737	ENSRNOG00000018125	Sephs1	selenophosphate synthetase 1 [Source:RGD Symbol;Acc:1311182]
0.438246	4.14106	5.51933	4.81779e-05	0.000380247	1.77686	ENSRNOG00000013257	Hecw2	HECT, C2 and WW domain containing E3 ubiquitin protein ligase 2 [Source:RGD Symbol;Acc:1593244]
0.967519	3.32567	5.51571	4.85177e-05	0.000382605	2.03426	ENSRNOG00000009149	Jam3	junctional adhesion molecule 3 [Source:RGD Symbol;Acc:1303248]
0.611482	4.20946	5.51539	4.8548e-05	0.000382605	1.78958	ENSRNOG00000007057	Csmd2	CUB and Sushi multiple domains 2 [Source:RGD Symbol;Acc:1565728]
-0.636783	5.15271	-5.51485	4.8599e-05	0.000382726	1.53058	ENSRNOG00000001593	Lnpk	lunapark, ER junction formation factor [Source:RGD Symbol;Acc:1312042]
0.339617	7.63847	5.51394	4.86856e-05	0.000383127	1.39834	ENSRNOG00000005667	Astn1	astrotactin 1 [Source:RGD Symbol;Acc:727799]
-0.440877	4.29096	-5.51324	4.8751e-05	0.00038336	1.68004	ENSRNOG00000006515	Klhl15	kelch-like family member 15 [Source:RGD Symbol;Acc:1563101]
1.74681	4.32271	5.51195	4.88738e-05	0.000384044	1.80887	ENSRNOG00000000777	RT1-S3	RT1 class Ib, locus S3 [Source:RGD Symbol;Acc:735037]
-0.456185	3.57183	-5.51093	4.89712e-05	0.000384307	1.8168	ENSRNOG00000010553	Pnma1	PNMA family member 1 [Source:RGD Symbol;Acc:621230]
-0.536526	7.60602	-5.51084	4.89789e-05	0.000384307	1.3896	ENSRNOG00000029410	LOC108348870	60S ribosomal protein L21-like [Source:RGD Symbol;Acc:11423435]
-0.812156	6.60226	-5.50911	4.91439e-05	0.00038532	1.39397	ENSRNOG00000005256	Zc3h15	zinc finger CCCH-type containing 15 [Source:RGD Symbol;Acc:1359234]
5.46369	-0.284415	5.50778	4.92715e-05	0.000386038	-0.590722	ENSRNOG00000032240	Gbp5	guanylate binding protein 5 [Source:RGD Symbol;Acc:1311040]
4.12812	2.07521	5.50473	4.95647e-05	0.000388052	1.68555	ENSRNOG00000015078	Ifitm3	interferon induced transmembrane protein 3 [Source:RGD Symbol;Acc:1595844]
1.41024	1.52395	5.50416	4.9619e-05	0.000388193	2.12375	ENSRNOG00000020298	Bag3	BAG cochaperone 3 [Source:RGD Symbol;Acc:1307794]
0.503348	3.29406	5.50292	4.97394e-05	0.000388852	1.90413	ENSRNOG00000022286	Dmrtc1b	DMRT-like family C1b [Source:RGD Symbol;Acc:1596820]
0.512837	6.08774	5.49968	5.00538e-05	0.000391002	1.43573	ENSRNOG00000047137	Erbin	erbb2 interacting protein [Source:RGD Symbol;Acc:1562952]
-0.329569	5.45689	-5.49896	5.01238e-05	0.000391002	1.49252	ENSRNOG00000051061	Prep	prolyl endopeptidase [Source:RGD Symbol;Acc:620841]
-0.495188	5.93788	-5.49905	5.01152e-05	0.000391002	1.42753	ENSRNOG00000010852	Nup205	nucleoporin 205 [Source:RGD Symbol;Acc:1309413]
0.908209	4.84768	5.49612	5.04011e-05	0.000392799	1.71324	ENSRNOG00000004805	Stac2	SH3 and cysteine rich domain 2 [Source:RGD Symbol;Acc:1305548]
-1.27039	8.01491	-5.49585	5.04274e-05	0.000392799	1.38134	ENSRNOG00000019858	Rom1	retinal outer segment membrane protein 1 [Source:RGD Symbol;Acc:1306070]
-0.431643	7.64988	-5.49449	5.05614e-05	0.000393557	1.35695	ENSRNOG00000014549	Arhgef26	Rho guanine nucleotide exchange factor 26 [Source:RGD Symbol;Acc:1562559]
-1.14166	3.14748	-5.49349	5.066e-05	0.000394039	1.90754	ENSRNOG00000001288	Gpr146	G protein-coupled receptor 146 [Source:RGD Symbol;Acc:1560731]
0.308319	5.77117	5.49296	5.07122e-05	0.000394158	1.46913	ENSRNOG00000021265	Cds2	CDP-diacylglycerol synthase 2 [Source:RGD Symbol;Acc:621186]
0.837785	2.64588	5.49187	5.08202e-05	0.000394283	2.09516	ENSRNOG00000020578	Ceacam1	CEA cell adhesion molecule 1 [Source:RGD Symbol;Acc:67396]
0.397178	5.06605	5.49131	5.08752e-05	0.000394283	1.54423	ENSRNOG00000016874	Zfp521	zinc finger protein 521 [Source:RGD Symbol;Acc:1307345]
-0.769226	1.9122	-5.49156	5.08504e-05	0.000394283	2.10286	ENSRNOG00000014513	Rexo5	RNA exonuclease 5 [Source:RGD Symbol;Acc:1305412]
-0.876638	8.3182	-5.49242	5.07658e-05	0.000394283	1.36532	ENSRNOG00000051911	Rbp3	retinol binding protein 3 [Source:RGD Symbol;Acc:3545]
0.492409	4.1709	5.4908	5.09256e-05	0.000394389	1.75092	ENSRNOG00000051688	Syt15	synaptotagmin 15 [Source:RGD Symbol;Acc:727964]
-0.282313	6.1845	-5.48631	5.13725e-05	0.000397276	1.39611	ENSRNOG00000042179	Cfap20	cilia and flagella associated protein 20 [Source:RGD Symbol;Acc:1308493]
-0.361961	4.87556	-5.4864	5.13634e-05	0.000397276	1.56047	ENSRNOG00000048288	Taf12	TATA-box binding protein associated factor 12 [Source:RGD Symbol;Acc:1592841]
-0.45072	8.39798	-5.48158	5.18483e-05	0.000400666	1.3377	ENSRNOG00000005310	Cul1	cullin 1 [Source:RGD Symbol;Acc:1308157]
5.61811	0.802668	5.47988	5.20199e-05	0.000401703	-0.0177324	ENSRNOG00000018735	Cd74	CD74 molecule [Source:RGD Symbol;Acc:2313]
0.232796	5.80742	5.47847	5.21627e-05	0.000402226	1.41949	ENSRNOG00000005228	Gnptab	N-acetylglucosamine-1-phosphate transferase subunits alpha and beta [Source:RGD Symbol;Acc:1564821]
-0.340452	6.15253	-5.47873	5.21367e-05	0.000402226	1.37359	ENSRNOG00000014285	Ssh2	slingshot protein phosphatase 2 [Source:RGD Symbol;Acc:1309389]
-0.49154	6.81797	-5.47528	5.24883e-05	0.000404447	1.32439	ENSRNOG00000013411	Nup155	nucleoporin 155 [Source:RGD Symbol;Acc:621199]
1.22834	4.15051	5.47461	5.25564e-05	0.000404681	1.77539	ENSRNOG00000013751	Plpbp	pyridoxal phosphate binding protein [Source:RGD Symbol;Acc:1308962]
0.510894	4.83925	5.46533	5.35149e-05	0.000411765	1.56915	ENSRNOG00000012953	Arsa	arylsulfatase A [Source:RGD Symbol;Acc:1310381]
0.304363	5.15451	5.46251	5.38108e-05	0.000413449	1.47629	ENSRNOG00000004581	Zdhhc9	zinc finger DHHC-type palmitoyltransferase 9 [Source:RGD Symbol;Acc:1561389]
-0.443249	5.31904	-5.46282	5.37778e-05	0.000413449	1.44842	ENSRNOG00000060994	NA	NA
-0.521001	5.38293	-5.4587	5.42116e-05	0.000416086	1.39414	ENSRNOG00000031406	Hps3	HPS3, biogenesis of lysosomal organelles complex 2 subunit 1 [Source:RGD Symbol;Acc:1310548]
-0.604302	3.53271	-5.45851	5.42316e-05	0.000416086	1.6907	ENSRNOG00000010172	Mkrn3	makorin, ring finger protein, 3 [Source:RGD Symbol;Acc:1311197]
-0.596875	6.55625	-5.44965	5.51769e-05	0.000423036	1.27852	ENSRNOG00000014511	Alg10	ALG10, alpha-1,2-glucosyltransferase [Source:RGD Symbol;Acc:708500]
0.293168	5.67898	5.44909	5.52378e-05	0.0004232	1.37485	ENSRNOG00000010379	Celf1	CUGBP, Elav-like family member 1 [Source:RGD Symbol;Acc:1307721]
-0.570653	7.81257	-5.44416	5.57713e-05	0.000426983	1.25734	ENSRNOG00000012806	Rbbp6	RB binding protein 6, ubiquitin ligase [Source:RGD Symbol;Acc:1311964]
-0.285998	5.87536	-5.44315	5.58813e-05	0.000427452	1.32689	ENSRNOG00000027756	Usf3	upstream transcription factor family member 3 [Source:RGD Symbol;Acc:1560175]
-0.798436	4.00484	-5.44287	5.59123e-05	0.000427452	1.64888	ENSRNOG00000013690	Clba1	clathrin binding box of aftiphilin containing 1 [Source:RGD Symbol;Acc:1307315]
-0.96197	2.80349	-5.43868	5.63716e-05	0.000430657	1.80644	ENSRNOG00000023116	Agmo	alkylglycerol monooxygenase [Source:RGD Symbol;Acc:1312038]
0.836426	2.36566	5.43694	5.65633e-05	0.000431813	2.0365	ENSRNOG00000027259	Faxdc2	fatty acid hydroxylase domain containing 2 [Source:RGD Symbol;Acc:1586284]
-0.574438	6.79992	-5.43086	5.72393e-05	0.000436663	1.2346	ENSRNOG00000025651	Ikzf5	IKAROS family zinc finger 5 [Source:RGD Symbol;Acc:1310965]
-0.257502	6.76517	-5.42794	5.75665e-05	0.000438848	1.24514	ENSRNOG00000060005	Surf4	surfeit 4 [Source:RGD Symbol;Acc:1561980]
-0.297162	8.13197	-5.42638	5.77425e-05	0.000439877	1.22439	ENSRNOG00000004402	Lpgat1	lysophosphatidylglycerol acyltransferase 1 [Source:RGD Symbol;Acc:1585897]
-0.970674	2.61782	-5.42253	5.81782e-05	0.000442881	1.76731	ENSRNOG00000002012	Donson	DNA replication fork stabilization factor DONSON [Source:RGD Symbol;Acc:1306823]
-0.546287	5.75488	-5.41692	5.88197e-05	0.000447447	1.3042	ENSRNOG00000019154	Zmynd8	zinc finger, MYND-type containing 8 [Source:RGD Symbol;Acc:1309544]
1.04673	2.95872	5.4158	5.89487e-05	0.000447559	1.96467	ENSRNOG00000004873	Prkch	protein kinase C, eta [Source:RGD Symbol;Acc:621888]
-0.254242	7.62554	-5.4157	5.89596e-05	0.000447559	1.19971	ENSRNOG00000009474	Ddx42	DEAD-box helicase 42 [Source:RGD Symbol;Acc:1304909]
-0.509001	4.75752	-5.41638	5.88816e-05	0.000447559	1.42326	ENSRNOG00000016559	Tm2d2	TM2 domain containing 2 [Source:RGD Symbol;Acc:1306769]
0.475544	6.44478	5.41438	5.91129e-05	0.000448405	1.25995	ENSRNOG00000005281	Stx16	syntaxin 16 [Source:RGD Symbol;Acc:1309423]
-0.726039	3.67306	-5.41373	5.91872e-05	0.000448651	1.61309	ENSRNOG00000017373	Rhobtb2	Rho-related BTB domain containing 2 [Source:RGD Symbol;Acc:1309924]
-0.3702	6.57626	-5.41063	5.95478e-05	0.000451066	1.21548	ENSRNOG00000024019	Ccdc6	coiled-coil domain containing 6 [Source:RGD Symbol;Acc:1587433]
-0.581985	7.99882	-5.40981	5.9643e-05	0.000451468	1.18982	ENSRNOG00000006523	Atl2	atlastin GTPase 2 [Source:RGD Symbol;Acc:1305125]
-0.821536	7.32838	-5.40612	6.00759e-05	0.000454424	1.17912	ENSRNOG00000013587	Fam135a	family with sequence similarity 135, member A [Source:RGD Symbol;Acc:1304927]
1.7209	1.39909	5.40356	6.03768e-05	0.000456111	1.83618	ENSRNOG00000007377	Slit3	slit guidance ligand 3 [Source:RGD Symbol;Acc:69311]
-0.346623	5.9596	-5.4035	6.03839e-05	0.000456111	1.23092	ENSRNOG00000020216	Gmpr2	guanosine monophosphate reductase 2 [Source:RGD Symbol;Acc:628875]
-2.19074	3.1343	-5.4008	6.0704e-05	0.000458206	1.88699	ENSRNOG00000058133	Ppm1n	protein phosphatase, Mg2+/Mn2+ dependent 1N [Source:RGD Symbol;Acc:1562091]
0.753595	5.2272	5.39961	6.08455e-05	0.000458951	1.40511	ENSRNOG00000031081	Stat2	signal transducer and activator of transcription 2 [Source:RGD Symbol;Acc:1311649]
-0.25258	6.34747	-5.39882	6.09394e-05	0.000459014	1.20177	ENSRNOG00000000068	Ppp2r5a	protein phosphatase 2, regulatory subunit B', alpha [Source:RGD Symbol;Acc:1308022]
-0.716535	6.26521	-5.39886	6.09356e-05	0.000459014	1.18468	ENSRNOG00000021839	Cep126	centrosomal protein 126 [Source:RGD Symbol;Acc:1563556]
-0.398341	6.74306	-5.39465	6.14398e-05	0.000462458	1.16833	ENSRNOG00000058914	Rbx1	ring-box 1 [Source:RGD Symbol;Acc:1308453]
-0.392395	7.7178	-5.39118	6.1858e-05	0.000465279	1.15028	ENSRNOG00000001238	Rsrc2	arginine and serine rich coiled-coil 2 [Source:RGD Symbol;Acc:1564882]
0.774343	3.32854	5.38965	6.20439e-05	0.000466323	1.76266	ENSRNOG00000018231	Nacc2	NACC family member 2 [Source:RGD Symbol;Acc:1309292]
0.559241	2.60624	5.38932	6.20836e-05	0.000466323	1.85384	ENSRNOG00000042070	Ticam2	TIR domain containing adaptor molecule 2 [Source:RGD Symbol;Acc:1308258]
-0.500901	5.9206	-5.37877	6.33812e-05	0.000475736	1.18378	ENSRNOG00000001243	Zcchc8	zinc finger CCHC-type containing 8 [Source:RGD Symbol;Acc:1309774]
-2.0752	1.11992	-5.37736	6.35561e-05	0.000476716	1.94411	ENSRNOG00000042277	LOC108352809	40S ribosomal protein S12 pseudogene [Source:RGD Symbol;Acc:11400929]
0.596585	4.44285	5.37411	6.39623e-05	0.000479287	1.45739	ENSRNOG00000004711	Mta1	metastasis associated 1 [Source:RGD Symbol;Acc:621018]
-0.631116	5.05451	-5.3739	6.39884e-05	0.000479287	1.26194	ENSRNOG00000001816	Rfc4	replication factor C subunit 4 [Source:RGD Symbol;Acc:1310142]
-0.433218	6.72157	-5.37352	6.40363e-05	0.000479311	1.12601	ENSRNOG00000026942	RGD1311595	similar to KIAA2026 protein [Source:RGD Symbol;Acc:1311595]
0.498335	6.06894	5.37282	6.4125e-05	0.000479641	1.18147	ENSRNOG00000004624	Rnd3	Rho family GTPase 3 [Source:RGD Symbol;Acc:1359690]
-0.241556	6.53096	-5.37244	6.4172e-05	0.000479657	1.13674	ENSRNOG00000004526	Cox7a2l	cytochrome c oxidase subunit 7A2 like [Source:RGD Symbol;Acc:1306111]
0.519654	7.37334	5.37033	6.44386e-05	0.000481315	1.13448	ENSRNOG00000003365	Cadm3	cell adhesion molecule 3 [Source:RGD Symbol;Acc:1307035]
-0.626805	4.17543	-5.36971	6.45173e-05	0.000481568	1.43828	ENSRNOG00000042777	Zfp28	zinc finger protein 28 [Source:RGD Symbol;Acc:7679103]
-0.297458	5.7231	-5.3684	6.46832e-05	0.000482135	1.18911	ENSRNOG00000030932	Zfp14	ZFP14 zinc finger protein [Source:RGD Symbol;Acc:1560188]
-0.640997	8.24363	-5.36872	6.46423e-05	0.000482135	1.11018	ENSRNOG00000052513	Wapl	WAPL cohesin release factor [Source:RGD Symbol;Acc:1590924]
2.63684	1.84193	5.36735	6.4816e-05	0.000482693	1.50081	ENSRNOG00000039754	Rab7b	Rab7b, member RAS oncogene family [Source:RGD Symbol;Acc:1562617]
-0.466776	8.63045	-5.3671	6.4848e-05	0.000482693	1.11121	ENSRNOG00000007834	Cand1	cullin-associated and neddylation-dissociated 1 [Source:RGD Symbol;Acc:620479]
-0.409043	4.555	-5.3655	6.50525e-05	0.000483878	1.33428	ENSRNOG00000002713	Zfp672	zinc finger protein 672 [Source:RGD Symbol;Acc:1359094]
-0.55086	3.72765	-5.36472	6.51513e-05	0.000484278	1.49623	ENSRNOG00000004275	Egfl6	EGF-like-domain, multiple 6 [Source:RGD Symbol;Acc:1563321]
-0.653109	5.5545	-5.36213	6.54836e-05	0.000486411	1.21789	ENSRNOG00000024934	Npat	nuclear protein, co-activator of histone transcription [Source:RGD Symbol;Acc:1311947]
0.398762	7.28383	5.36092	6.56395e-05	0.000487232	1.09351	ENSRNOG00000018350	Shtn1	shootin 1 [Source:RGD Symbol;Acc:1311558]
-0.317482	4.8626	-5.36006	6.57506e-05	0.000487719	1.29963	ENSRNOG00000020692	Tmem216	transmembrane protein 216 [Source:RGD Symbol;Acc:1304607]
-0.34648	3.89241	-5.35782	6.60403e-05	0.000489529	1.46763	ENSRNOG00000003979	Zranb3	zinc finger RANBP2-type containing 3 [Source:RGD Symbol;Acc:1564952]
-0.575517	8.03024	-5.35738	6.60969e-05	0.00048961	1.08466	ENSRNOG00000015686	Cert1	ceramide transporter 1 [Source:RGD Symbol;Acc:1309131]
-0.409808	4.21224	-5.35417	6.65144e-05	0.000492363	1.42973	ENSRNOG00000061995	NA	NA
2.7175	1.06319	5.35124	6.68985e-05	0.000494523	1.49112	ENSRNOG00000015859	Chdh	choline dehydrogenase [Source:RGD Symbol;Acc:735166]
-1.19104	5.04362	-5.35141	6.68757e-05	0.000494523	1.30687	ENSRNOG00000019873	B3gat3	beta-1,3-glucuronyltransferase 3 [Source:RGD Symbol;Acc:1311968]
0.342766	5.29988	5.34019	6.83661e-05	0.000505024	1.23102	ENSRNOG00000005616	Ncoa3	nuclear receptor coactivator 3 [Source:RGD Symbol;Acc:620109]
-0.318309	4.75842	-5.3382	6.86345e-05	0.000506658	1.2643	ENSRNOG00000021469	Ccdc14	coiled-coil domain containing 14 [Source:RGD Symbol;Acc:1562189]
0.581853	4.79534	5.33743	6.87384e-05	0.000506781	1.32639	ENSRNOG00000060821	Rnf114	ring finger protein 114 [Source:RGD Symbol;Acc:1303139]
0.335999	4.53266	5.33737	6.87457e-05	0.000506781	1.33893	ENSRNOG00000002227	Kit	KIT proto-oncogene receptor tyrosine kinase [Source:RGD Symbol;Acc:620568]
-0.474579	4.40306	-5.33526	6.90319e-05	0.000508541	1.3018	ENSRNOG00000012409	Exosc3	exosome component 3 [Source:RGD Symbol;Acc:1304739]
-0.309258	8.82839	-5.33414	6.91845e-05	0.000509316	1.04781	ENSRNOG00000028449	Rpl9	ribosomal protein L9 [Source:RGD Symbol;Acc:62049]
0.881261	3.92713	5.33176	6.95082e-05	0.000511348	1.57494	ENSRNOG00000019850	Speg	striated muscle enriched protein kinase [Source:RGD Symbol;Acc:2124]
0.732978	5.0022	5.33023	6.9718e-05	0.000512539	1.29692	ENSRNOG00000017120	Abhd2	abhydrolase domain containing 2, acylglycerol lipase [Source:RGD Symbol;Acc:1311389]
0.786159	3.78729	5.32942	6.98293e-05	0.000512655	1.57103	ENSRNOG00000027871	Rapgefl1	Rap guanine nucleotide exchange factor like 1 [Source:RGD Symbol;Acc:1563269]
0.323207	5.32612	5.32971	6.97893e-05	0.000512655	1.173	ENSRNOG00000004189	Helb	DNA helicase B [Source:RGD Symbol;Acc:1560103]
0.56665	4.50409	5.32258	7.0775e-05	0.000518676	1.35969	ENSRNOG00000005662	Grm7	glutamate metabotropic receptor 7 [Source:RGD Symbol;Acc:619857]
0.566216	2.6891	5.3225	7.07862e-05	0.000518676	1.71373	ENSRNOG00000005093	Lgr6	leucine-rich repeat-containing G protein-coupled receptor 6 [Source:RGD Symbol;Acc:1560339]
-0.290344	8.81146	-5.32244	7.07945e-05	0.000518676	1.02407	ENSRNOG00000021614	Kmt2e	lysine methyltransferase 2E [Source:RGD Symbol;Acc:1309641]
-0.438659	6.73217	-5.32154	7.09197e-05	0.000519238	1.01882	ENSRNOG00000034022	Taf2	TATA-box binding protein associated factor 2 [Source:RGD Symbol;Acc:621487]
-0.662323	8.05947	-5.31824	7.13823e-05	0.000522263	1.00626	ENSRNOG00000014945	Kpna3	karyopherin subunit alpha 3 [Source:RGD Symbol;Acc:1311339]
-1.28235	3.02038	-5.3179	7.14301e-05	0.000522263	1.7559	ENSRNOG00000027911	Stkld1	serine/threonine kinase-like domain containing 1 [Source:RGD Symbol;Acc:1307355]
-0.906127	2.16149	-5.31728	7.15169e-05	0.000522541	1.71666	ENSRNOG00000004440	Fignl1	fidgetin-like 1 [Source:RGD Symbol;Acc:1307112]
0.536466	3.25036	5.31167	7.23104e-05	0.000527979	1.54773	ENSRNOG00000008554	Slc9a9	solute carrier family 9 member A9 [Source:RGD Symbol;Acc:1560736]
0.629346	5.9636	5.31095	7.24138e-05	0.000528375	1.06052	ENSRNOG00000015036	Ccn2	cellular communication network factor 2 [Source:RGD Symbol;Acc:621392]
-0.325263	5.37329	-5.30738	7.29241e-05	0.000531736	1.12069	ENSRNOG00000025724	Mtf1	metal-regulatory transcription factor 1 [Source:RGD Symbol;Acc:1308956]
-0.406525	4.4463	-5.30637	7.30688e-05	0.000532429	1.2555	ENSRNOG00000006898	Mrps16	mitochondrial ribosomal protein S16 [Source:RGD Symbol;Acc:1582995]
-1.21982	2.5495	-5.30568	7.31681e-05	0.000532791	1.55768	ENSRNOG00000021472	Ermn	ermin [Source:RGD Symbol;Acc:1308367]
-0.237468	6.62839	-5.30371	7.34525e-05	0.000534499	0.994406	ENSRNOG00000003822	Slu7	SLU7 homolog, splicing factor [Source:RGD Symbol;Acc:631432]
-0.2923	5.5421	-5.29947	7.40689e-05	0.000538619	1.07274	ENSRNOG00000031731	Fam216a	family with sequence similarity 216, member A [Source:RGD Symbol;Acc:1310861]
-0.421813	5.41857	-5.29875	7.41735e-05	0.000539015	1.06859	ENSRNOG00000017876	Dnajc21	DnaJ heat shock protein family (Hsp40) member C21 [Source:RGD Symbol;Acc:621729]
0.92446	3.40643	5.29684	7.44544e-05	0.000540324	1.56021	ENSRNOG00000020580	Shfl	shiftless antiviral inhibitor of ribosomal frameshifting [Source:RGD Symbol;Acc:1565995]
-0.508239	8.2711	-5.29694	7.44395e-05	0.000540324	0.965448	ENSRNOG00000028176	Elmod2	ELMO domain containing 2 [Source:RGD Symbol;Acc:1587598]
0.262656	6.50921	5.29612	7.45599e-05	0.000540723	0.999976	ENSRNOG00000028335	Fat4	FAT atypical cadherin 4 [Source:RGD Symbol;Acc:1564291]
-0.944406	5.95286	-5.29456	7.47896e-05	0.000542022	1.08456	ENSRNOG00000047225	Tma7	translation machinery associated 7 homolog [Source:RGD Symbol;Acc:1584795]
0.648333	2.92191	5.29374	7.49101e-05	0.000542529	1.63119	ENSRNOG00000045948	Arl10	ADP-ribosylation factor like GTPase 10 [Source:RGD Symbol;Acc:1303298]
-0.313565	6.63168	-5.29323	7.49849e-05	0.000542704	0.968427	ENSRNOG00000007234	Cyp51	cytochrome P450, family 51 [Source:RGD Symbol;Acc:2481]
0.905877	3.60314	5.29239	7.51099e-05	0.000543243	1.43609	ENSRNOG00000018297	Ocln	occludin [Source:RGD Symbol;Acc:620089]
1.15627	4.64495	5.28728	7.58707e-05	0.000548253	1.37067	ENSRNOG00000020144	Rusf1	RUS family member 1 [Source:RGD Symbol;Acc:1310127]
-0.360386	4.70853	-5.28705	7.59049e-05	0.000548253	1.18418	ENSRNOG00000052959	Zscan12	zinc finger and SCAN domain containing 12 [Source:RGD Symbol;Acc:628738]
0.723092	3.92268	5.28577	7.60962e-05	0.000549263	1.45943	ENSRNOG00000004589	Galnt16	polypeptide N-acetylgalactosaminyltransferase 16 [Source:RGD Symbol;Acc:1310202]
-0.609693	5.59651	-5.28543	7.61472e-05	0.000549263	1.01328	ENSRNOG00000033906	Zfp667	zinc finger protein 667 [Source:RGD Symbol;Acc:1359114]
-0.331033	6.03896	-5.28419	7.63332e-05	0.000550235	0.988459	ENSRNOG00000018550	Ncbp3	nuclear cap binding subunit 3 [Source:RGD Symbol;Acc:1308139]
-0.306035	7.03005	-5.28261	7.65717e-05	0.000551584	0.934067	ENSRNOG00000001032	Ccz1b	CCZ1 homolog B, vacuolar protein trafficking and biogenesis associated [Source:RGD Symbol;Acc:1306410]
0.654861	3.15648	5.28155	7.67317e-05	0.000551995	1.59821	ENSRNOG00000001259	Cux2	cut-like homeobox 2 [Source:RGD Symbol;Acc:1305967]
-1.18394	4.80701	-5.28157	7.67294e-05	0.000551995	1.10526	ENSRNOG00000003563	Blmh	bleomycin hydrolase [Source:RGD Symbol;Acc:1304668]
-0.547116	3.73159	-5.28102	7.68122e-05	0.000552203	1.314	ENSRNOG00000055079	Ndufaf2	NADH:ubiquinone oxidoreductase complex assembly factor 2 [Source:RGD Symbol;Acc:1560158]
0.402267	4.44004	5.27982	7.69951e-05	0.000552903	1.23254	ENSRNOG00000015232	Pip5k1b	phosphatidylinositol-4-phosphate 5-kinase type 1 beta [Source:RGD Symbol;Acc:1310914]
-0.634397	8.16054	-5.2797	7.70126e-05	0.000552903	0.929772	ENSRNOG00000011586	Ccnl1	cyclin L1 [Source:RGD Symbol;Acc:620864]
0.930526	2.91426	5.27867	7.71692e-05	0.000553287	1.68345	ENSRNOG00000012966	Acadl	acyl-CoA dehydrogenase, long chain [Source:RGD Symbol;Acc:2011]
-0.407923	5.83675	-5.27876	7.71551e-05	0.000553287	1.01226	ENSRNOG00000018610	Pde6d	phosphodiesterase 6D [Source:RGD Symbol;Acc:1306204]
1.25567	4.44308	5.27329	7.79927e-05	0.000558817	1.37516	ENSRNOG00000021087	Lgi4	leucine-rich repeat LGI family, member 4 [Source:RGD Symbol;Acc:735035]
-0.781264	3.85762	-5.27246	7.81206e-05	0.00055936	1.31238	ENSRNOG00000000493	Snrpc	small nuclear ribonucleoprotein polypeptide C [Source:RGD Symbol;Acc:1306065]
-0.373659	5.73711	-5.27073	7.83879e-05	0.0005609	1.01253	ENSRNOG00000052814	Ankrd27	ankyrin repeat domain 27 [Source:RGD Symbol;Acc:1307106]
-0.405991	3.89142	-5.26643	7.90562e-05	0.000565304	1.26204	ENSRNOG00000049505	Nup43	nucleoporin 43 [Source:RGD Symbol;Acc:1596513]
-0.94531	1.70652	-5.266	7.91235e-05	0.000565409	1.69028	ENSRNOG00000062220	Cenpp	centromere protein P [Source:RGD Symbol;Acc:1589530]
-0.756094	4.87494	-5.26459	7.93433e-05	0.000566602	1.06256	ENSRNOG00000048961	Bhlhe41	basic helix-loop-helix family, member e41 [Source:RGD Symbol;Acc:70900]
3.4387	1.8897	5.26378	7.94709e-05	0.000567091	1.31042	ENSRNOG00000046254	Adgre1	adhesion G protein-coupled receptor E1 [Source:RGD Symbol;Acc:1359214]
-0.611007	4.64172	-5.26348	7.95176e-05	0.000567091	1.09936	ENSRNOG00000001074	Mphosph9	M-phase phosphoprotein 9 [Source:RGD Symbol;Acc:1598368]
0.982822	2.19384	5.25653	8.06159e-05	0.000573792	1.70033	ENSRNOG00000055650	Pou2f2	POU class 2 homeobox 2 [Source:RGD Symbol;Acc:621690]
0.717285	3.00389	5.25652	8.06176e-05	0.000573792	1.56303	ENSRNOG00000027936	Ccdc8	coiled-coil domain containing 8 [Source:RGD Symbol;Acc:1359717]
-0.583274	6.53869	-5.25665	8.05983e-05	0.000573792	0.890373	ENSRNOG00000010027	Atr	ATR serine/threonine kinase [Source:RGD Symbol;Acc:1305796]
0.600023	4.93571	5.25299	8.11828e-05	0.000577431	1.0767	ENSRNOG00000002461	Nid1	nidogen 1 [Source:RGD Symbol;Acc:3178]
-0.485137	7.97074	-5.2487	8.18731e-05	0.000581956	0.864843	ENSRNOG00000014916	Lats1	large tumor suppressor kinase 1 [Source:RGD Symbol;Acc:1564085]
-0.589067	6.20021	-5.24829	8.19406e-05	0.00058205	0.893566	ENSRNOG00000043210	Ppp3r1	protein phosphatase 3, regulatory subunit B, alpha [Source:RGD Symbol;Acc:69230]
-0.378047	10.1897	-5.24669	8.21996e-05	0.000583375	0.905424	ENSRNOG00000038436	Bltp1	bridge-like lipid transfer protein family member 1 [Source:RGD Symbol;Acc:1307100]
-0.476057	6.9921	-5.24646	8.2236e-05	0.000583375	0.860187	ENSRNOG00000017728	Edrf1	erythroid differentiation regulatory factor 1 [Source:RGD Symbol;Acc:1306820]
-0.285682	8.22073	-5.24014	8.32716e-05	0.000590331	0.849696	ENSRNOG00000009642	Cct4	chaperonin containing TCP1 subunit 4 [Source:RGD Symbol;Acc:727937]
-0.653928	4.13021	-5.23906	8.34482e-05	0.000591193	1.17217	ENSRNOG00000001043	Ddx55	DEAD-box helicase 55 [Source:RGD Symbol;Acc:2324094]
0.540999	5.79551	5.23743	8.37176e-05	0.000592045	0.97506	ENSRNOG00000027024	Rgs16	regulator of G-protein signaling 16 [Source:RGD Symbol;Acc:1589741]
0.499507	4.43941	5.237	8.37894e-05	0.000592045	1.13902	ENSRNOG00000006738	Fbxo32	F-box protein 32 [Source:RGD Symbol;Acc:620373]
0.296114	5.21228	5.23709	8.37747e-05	0.000592045	1.01922	ENSRNOG00000029798	Lrrc4c	leucine rich repeat containing 4C [Source:RGD Symbol;Acc:1311013]
-0.259848	5.68682	-5.2375	8.3707e-05	0.000592045	0.930558	ENSRNOG00000012702	Nfya	nuclear transcription factor Y subunit alpha [Source:RGD Symbol;Acc:70976]
0.410448	5.20519	5.23266	8.45114e-05	0.000596754	1.03261	ENSRNOG00000052707	Cacna1a	calcium voltage-gated channel subunit alpha1 A [Source:RGD Symbol;Acc:2244]
-0.368545	5.99124	-5.23097	8.47943e-05	0.000598358	0.876281	ENSRNOG00000052787	Rsl24d1	ribosomal L24 domain containing 1 [Source:RGD Symbol;Acc:1309784]
-0.564332	5.87371	-5.23022	8.49205e-05	0.000598854	0.879997	ENSRNOG00000005710	Rbm7	RNA binding motif protein 7 [Source:RGD Symbol;Acc:1308017]
-0.794773	6.82074	-5.22989	8.49765e-05	0.000598856	0.82689	ENSRNOG00000032258	Swt1	SWT1 RNA endoribonuclease homolog [Source:RGD Symbol;Acc:1308695]
-0.563536	6.97689	-5.22887	8.51483e-05	0.000599672	0.82423	ENSRNOG00000020004	Rbm34	RNA binding motif protein 34 [Source:RGD Symbol;Acc:1310161]
0.727734	4.61151	5.22303	8.6138e-05	0.000606244	1.16545	ENSRNOG00000001795	Itgb5	integrin subunit beta 5 [Source:RGD Symbol;Acc:628869]
0.61909	2.78373	5.21695	8.71817e-05	0.000612786	1.53929	ENSRNOG00000010060	Panx1	Pannexin 1 [Source:RGD Symbol;Acc:735204]
-0.86112	6.914	-5.21727	8.71262e-05	0.000612786	0.800247	ENSRNOG00000003242	Gulp1	GULP PTB domain containing engulfment adaptor 1 [Source:RGD Symbol;Acc:1306380]
-0.267853	5.83485	-5.21442	8.76198e-05	0.000615461	0.884631	ENSRNOG00000019811	Timm23	translocase of inner mitochondrial membrane 23 [Source:RGD Symbol;Acc:3863]
1.01859	2.79735	5.21355	8.77707e-05	0.000615715	1.63567	ENSRNOG00000023951	Tbc1d30	TBC1 domain family, member 30 [Source:RGD Symbol;Acc:1305255]
0.541474	3.87148	5.21365	8.77532e-05	0.000615715	1.2515	ENSRNOG00000002032	Ifngr2	interferon gamma receptor 2 [Source:RGD Symbol;Acc:1307532]
-0.460981	6.50073	-5.21306	8.78552e-05	0.000615905	0.80517	ENSRNOG00000021264	Pcna	proliferating cell nuclear antigen [Source:RGD Symbol;Acc:3269]
0.52703	3.03293	5.21246	8.79589e-05	0.00061623	1.39215	ENSRNOG00000039076	Spaca6	sperm acrosome associated 6 [Source:RGD Symbol;Acc:1588836]
0.716305	4.26834	5.21093	8.82263e-05	0.000617699	1.20063	ENSRNOG00000013503	Cdh24	cadherin 24 [Source:RGD Symbol;Acc:1560161]
1.09526	3.02181	5.20582	8.91236e-05	0.000623575	1.56278	ENSRNOG00000000858	Sapcd1	suppressor APC domain containing 1 [Source:RGD Symbol;Acc:1359359]
-0.394377	7.01519	-5.20293	8.96365e-05	0.000626754	0.783991	ENSRNOG00000018680	Rpl17	ribosomal protein L17 [Source:RGD Symbol;Acc:1303019]
-0.477841	6.12497	-5.20047	9.00749e-05	0.000629409	0.803654	ENSRNOG00000001256	Atxn2	ataxin 2 [Source:RGD Symbol;Acc:1306637]
0.289508	5.04741	5.20012	9.01377e-05	0.000629438	0.959646	ENSRNOG00000015385	Pink1	PTEN induced kinase 1 [Source:RGD Symbol;Acc:1305769]
-0.393439	7.16207	-5.19768	9.05738e-05	0.000632072	0.760528	ENSRNOG00000011621	LOC100911576	heterogeneous nuclear ribonucleoproteins C1/C2-like [Source:RGD Symbol;Acc:6491888]
0.366394	6.43784	5.19539	9.09858e-05	0.000634534	0.809509	ENSRNOG00000005457	Lamp5	lysosomal-associated membrane protein family, member 5 [Source:RGD Symbol;Acc:1306991]
0.674253	3.25018	5.19178	9.16396e-05	0.000638679	1.36991	ENSRNOG00000055751	P3h2	prolyl 3-hydroxylase 2 [Source:RGD Symbol;Acc:1304568]
0.374346	5.05073	5.19145	9.16995e-05	0.000638681	0.940136	ENSRNOG00000036960	Abcc9	ATP binding cassette subfamily C member 9 [Source:RGD Symbol;Acc:3787]
-0.389813	4.92611	-5.19091	9.17984e-05	0.000638955	0.922236	ENSRNOG00000023220	Cnot11	CCR4-NOT transcription complex, subunit 11 [Source:RGD Symbol;Acc:1560909]
-0.631706	8.76131	-5.18842	9.2252e-05	0.000641696	0.752875	ENSRNOG00000008704	Tmem97	transmembrane protein 97 [Source:RGD Symbol;Acc:1307423]
-0.323566	4.97671	-5.18439	9.29929e-05	0.00064643	0.916738	ENSRNOG00000008757	Tmem218	transmembrane protein 218 [Source:RGD Symbol;Acc:1311364]
4.86301	0.151283	5.18229	9.3382e-05	0.000648714	-0.45155	ENSRNOG00000043416	Bcl3	BCL3, transcription coactivator [Source:RGD Symbol;Acc:1589465]
-0.3705	6.51193	-5.18153	9.35227e-05	0.000649272	0.74439	ENSRNOG00000014521	Armc8	armadillo repeat containing 8 [Source:RGD Symbol;Acc:1310477]
0.493519	5.63223	5.17692	9.43827e-05	0.000654818	0.879115	ENSRNOG00000017974	Gprin1	G protein-regulated inducer of neurite outgrowth 1 [Source:RGD Symbol;Acc:1308762]
-0.257175	7.24171	-5.1759	9.45734e-05	0.000655717	0.716839	ENSRNOG00000021748	Las1l	LAS1-like, ribosome biogenesis factor [Source:RGD Symbol;Acc:1565755]
-0.262111	6.72226	-5.16862	9.59497e-05	0.00066483	0.715987	ENSRNOG00000020284	Prkar2a	protein kinase cAMP-dependent type II regulatory subunit alpha [Source:RGD Symbol;Acc:3393]
0.67519	5.91634	5.16465	9.67107e-05	0.00066967	0.819026	ENSRNOG00000008354	Slc9a8	solute carrier family 9 member A8 [Source:RGD Symbol;Acc:1308193]
-0.40463	7.84646	-5.1634	9.69504e-05	0.000670897	0.690798	ENSRNOG00000017938	Btaf1	B-TFIID TATA-box binding protein associated factor 1 [Source:RGD Symbol;Acc:1564130]
1.2563	1.85716	5.1619	9.72399e-05	0.000672298	1.55103	ENSRNOG00000015948	Slc1a5	solute carrier family 1 member 5 [Source:RGD Symbol;Acc:708512]
1.07298	3.15066	5.16156	9.73058e-05	0.000672298	1.25469	ENSRNOG00000000655	Ptprc	protein tyrosine phosphatase, receptor type, C [Source:RGD Symbol;Acc:3451]
-0.272398	5.75111	-5.16105	9.74036e-05	0.000672298	0.772062	ENSRNOG00000017593	Mtr	5-methyltetrahydrofolate-homocysteine methyltransferase [Source:RGD Symbol;Acc:621283]
-0.382865	3.87167	-5.16129	9.73577e-05	0.000672298	1.06416	ENSRNOG00000031721	Dnajc30	DnaJ heat shock protein family (Hsp40) member C30 [Source:RGD Symbol;Acc:1595783]
0.294931	4.81611	5.16019	9.75702e-05	0.000672582	0.931537	ENSRNOG00000003479	Rnf150	ring finger protein 150 [Source:RGD Symbol;Acc:1304572]
-0.442067	7.31571	-5.16029	9.75508e-05	0.000672582	0.682929	ENSRNOG00000028129	Fktn	fukutin [Source:RGD Symbol;Acc:1310087]
0.489452	6.87638	5.15951	9.77026e-05	0.000673062	0.724119	ENSRNOG00000006075	Fez1	fasciculation and elongation protein zeta 1 [Source:RGD Symbol;Acc:619708]
-0.271597	7.67043	-5.15909	9.77848e-05	0.000673196	0.681197	ENSRNOG00000024779	Polr2b	RNA polymerase II subunit B [Source:RGD Symbol;Acc:1309477]
-0.623547	5.10919	-5.15847	9.79046e-05	0.000673589	0.816201	ENSRNOG00000015516	Zng1a	Zn regulated GTPase metalloprotein activator 1A [Source:RGD Symbol;Acc:708495]
0.381861	4.68241	5.15746	9.81014e-05	0.00067451	0.93029	ENSRNOG00000015054	Rcbtb2	RCC1 and BTB domain containing protein 2 [Source:RGD Symbol;Acc:735048]
0.506963	3.89305	5.15635	9.83184e-05	0.000675569	1.13215	ENSRNOG00000013017	Arnt2	aryl hydrocarbon receptor nuclear translocator 2 [Source:RGD Symbol;Acc:2154]
0.818608	5.68263	5.15513	9.85578e-05	0.000676781	0.768257	ENSRNOG00000029841	Cdh19	cadherin 19 [Source:RGD Symbol;Acc:1307169]
-0.537433	5.89614	-5.1539	9.87982e-05	0.000677997	0.722094	ENSRNOG00000015233	Etfa	electron transfer flavoprotein subunit alpha [Source:RGD Symbol;Acc:628747]
-0.390889	5.24565	-5.14942	9.96815e-05	0.000683621	0.815253	ENSRNOG00000033809	Mlh1	mutL homolog 1 [Source:RGD Symbol;Acc:620937]
1.26179	2.49899	5.14883	9.97989e-05	0.000683989	1.52508	ENSRNOG00000029682	Clic1	chloride intracellular channel 1 [Source:RGD Symbol;Acc:1303043]
0.349911	4.98286	5.14765	0.000100034	0.000685165	0.868177	ENSRNOG00000009113	Marcksl1	MARCKS-like 1 [Source:RGD Symbol;Acc:621197]
0.726324	5.62812	5.14724	0.000100116	0.000685284	0.762291	ENSRNOG00000000164	Lamp2	lysosomal-associated membrane protein 2 [Source:RGD Symbol;Acc:2990]
-0.49658	7.00664	-5.14679	0.000100205	0.000685462	0.65677	ENSRNOG00000007688	Sms	spermine synthase [Source:RGD Symbol;Acc:1564826]
0.823069	2.64379	5.14352	0.000100859	0.000689493	1.40879	ENSRNOG00000029127	Parp16	poly (ADP-ribose) polymerase family, member 16 [Source:RGD Symbol;Acc:1306243]
0.311005	5.86424	5.1423	0.000101103	0.00069072	0.733347	ENSRNOG00000008830	Nfe2l1	NFE2 like bZIP transcription factor 1 [Source:RGD Symbol;Acc:1311972]
-0.325448	4.55066	-5.14194	0.000101176	0.00069078	0.903424	ENSRNOG00000050857	Fut10	fucosyltransferase 10 [Source:RGD Symbol;Acc:1359164]
-0.340289	4.37274	-5.1412	0.000101325	0.000691358	0.921745	ENSRNOG00000014618	Med31	mediator complex subunit 31 [Source:RGD Symbol;Acc:1309457]
1.21168	3.79285	5.1358	0.000102419	0.000698379	1.2606	ENSRNOG00000042785	Sesn2	sestrin 2 [Source:RGD Symbol;Acc:1566319]
-0.340929	4.75822	-5.13487	0.000102609	0.000698783	0.852955	ENSRNOG00000020049	Slc7a6os	solute carrier family 7, member 6 opposite strand [Source:RGD Symbol;Acc:708394]
-0.51634	3.72889	-5.13497	0.00010259	0.000698783	1.01105	ENSRNOG00000034084	Ggct	gamma-glutamyl cyclotransferase [Source:RGD Symbol;Acc:1304876]
0.617327	3.38428	5.13356	0.000102877	0.000700164	1.22366	ENSRNOG00000010643	Kank2	KN motif and ankyrin repeat domains 2 [Source:RGD Symbol;Acc:2320289]
-4.35992	0.547488	-5.1313	0.00010334	0.000702873	0.825211	ENSRNOG00000006025	Lamb3	laminin subunit beta 3 [Source:RGD Symbol;Acc:1562668]
1.22128	1.5803	5.13091	0.000103422	0.000702983	1.50036	ENSRNOG00000013967	Blnk	B-cell linker [Source:RGD Symbol;Acc:1561933]
-0.860265	5.46857	-5.1304	0.000103527	0.000703249	0.707018	ENSRNOG00000003829	Ap3s1	adaptor related protein complex 3 subunit sigma 1 [Source:RGD Symbol;Acc:1311115]
-0.484281	7.62859	-5.12899	0.000103817	0.000704772	0.619225	ENSRNOG00000000157	Atg12	autophagy related 12 [Source:RGD Symbol;Acc:1306306]
-0.488605	7.11739	-5.12524	0.000104596	0.000709614	0.623064	ENSRNOG00000004973	Ppp2r5c	protein phosphatase 2, regulatory subunit B', gamma [Source:RGD Symbol;Acc:1585097]
-0.312795	7.58865	-5.12117	0.000105447	0.000714823	0.604863	ENSRNOG00000030247	Eif4ebp3	eukaryotic translation initiation factor 4E binding protein 3 [Source:RGD Symbol;Acc:2324556]
-0.942836	5.87406	-5.12093	0.000105497	0.000714823	0.736428	ENSRNOG00000008323	Pitpnm3	PITPNM family member 3 [Source:RGD Symbol;Acc:1308200]
-0.249407	5.92768	-5.1202	0.00010565	0.000715404	0.672491	ENSRNOG00000001040	Pms2	PMS1 homolog 2, mismatch repair system component [Source:RGD Symbol;Acc:1305483]
0.719986	3.49948	5.1189	0.000105925	0.000716812	1.21724	ENSRNOG00000027944	Pnma8a	PNMA family member 8A [Source:RGD Symbol;Acc:1310803]
0.390037	6.05533	5.11744	0.000106233	0.000718446	0.669767	ENSRNOG00000034025	Ptprj	protein tyrosine phosphatase, receptor type, J [Source:RGD Symbol;Acc:3454]
0.856407	4.6451	5.11666	0.000106398	0.000718653	0.899481	ENSRNOG00000000512	Slc26a8	solute carrier family 26 member 8 [Source:RGD Symbol;Acc:1308898]
-0.779104	6.07209	-5.11683	0.000106362	0.000718653	0.631555	ENSRNOG00000007253	Cbll1	Cbl proto-oncogene like 1 [Source:RGD Symbol;Acc:1310703]
-0.458691	8.37255	-5.11472	0.00010681	0.000720983	0.596893	ENSRNOG00000003679	Med13	mediator complex subunit 13 [Source:RGD Symbol;Acc:1304829]
-0.339586	6.58002	-5.10911	0.000108012	0.00072864	0.594558	ENSRNOG00000006000	Cdk12	cyclin-dependent kinase 12 [Source:RGD Symbol;Acc:621111]
-0.467316	4.61245	-5.10767	0.000108322	0.00073027	0.80247	ENSRNOG00000013059	Aste1	asteroid homolog 1 [Source:RGD Symbol;Acc:1304643]
-0.455275	3.89181	-5.10465	0.000108976	0.000734216	0.95676	ENSRNOG00000018510	Cdk7	cyclin-dependent kinase 7 [Source:RGD Symbol;Acc:621124]
0.35422	4.46885	5.10335	0.000109259	0.000735664	0.861344	ENSRNOG00000049880	Tmem200c	transmembrane protein 200C [Source:RGD Symbol;Acc:1561734]
0.400185	4.64261	5.10241	0.000109463	0.000736573	0.845604	ENSRNOG00000004932	Sel1l3	SEL1L family member 3 [Source:RGD Symbol;Acc:1562860]
0.506665	6.46488	5.10075	0.000109828	0.000738565	0.633812	ENSRNOG00000032828	Mapk8ip2	mitogen-activated protein kinase 8 interacting protein 2 [Source:RGD Symbol;Acc:1309727]
1.07365	3.64452	5.09642	0.000110778	0.000744491	1.19934	ENSRNOG00000001103	Sdk1	sidekick cell adhesion molecule 1 [Source:RGD Symbol;Acc:1560686]
-0.330426	7.37779	-5.09358	0.000111408	0.000748252	0.54845	ENSRNOG00000002710	Cnst	consortin, connexin sorting protein [Source:RGD Symbol;Acc:1564833]
-0.279529	5.05538	-5.09001	0.000112205	0.000753136	0.720828	ENSRNOG00000008892	Parp2	poly (ADP-ribose) polymerase 2 [Source:RGD Symbol;Acc:1310568]
-0.405776	5.57992	-5.08964	0.000112288	0.000753222	0.634559	ENSRNOG00000026913	Bbs10	Bardet-Biedl syndrome 10 [Source:RGD Symbol;Acc:1560748]
-0.685426	7.1758	-5.08895	0.000112442	0.000753784	0.537342	ENSRNOG00000002828	Tob1	transducer of ErbB-2.1 [Source:RGD Symbol;Acc:621126]
-0.336646	8.40298	-5.08829	0.00011259	0.000754305	0.542817	ENSRNOG00000016067	Ckap5	cytoskeleton associated protein 5 [Source:RGD Symbol;Acc:1563596]
0.294958	7.01984	5.08744	0.000112781	0.000754641	0.547241	ENSRNOG00000019476	Agap1	ArfGAP with GTPase domain, ankyrin repeat and PH domain 1 [Source:RGD Symbol;Acc:1309244]
-0.649217	6.73086	-5.08772	0.00011272	0.000754641	0.540315	ENSRNOG00000022736	Cdkn2aip	CDKN2A interacting protein [Source:RGD Symbol;Acc:1305302]
-1.3096	3.60066	-5.0848	0.000113378	0.000758164	1.16914	ENSRNOG00000013631	Slc31a2	solute carrier family 31 member 2 [Source:RGD Symbol;Acc:1307963]
-0.467338	3.49768	-5.08407	0.000113543	0.000758795	1.00799	ENSRNOG00000010636	Coa7	cytochrome c oxidase assembly factor 7 [Source:RGD Symbol;Acc:1305274]
-0.386735	4.86007	-5.08294	0.0001138	0.000760006	0.703062	ENSRNOG00000008222	Timm9	translocase of inner mitochondrial membrane 9 [Source:RGD Symbol;Acc:621656]
-0.809174	5.8841	-5.08265	0.000113866	0.000760006	0.568216	ENSRNOG00000051563	Giot1	gonadotropin inducible ovarian transcription factor 1 [Source:RGD Symbol;Acc:620184]
-0.467396	7.12006	-5.08192	0.000114031	0.000760162	0.523815	ENSRNOG00000042951	Xrn1	5'-3' exoribonuclease 1 [Source:RGD Symbol;Acc:1309713]
-0.570859	6.67207	-5.08213	0.000113984	0.000760162	0.530625	ENSRNOG00000003578	Fem1c	fem-1 homolog C [Source:RGD Symbol;Acc:1309322]
4.28807	-0.212499	5.08113	0.000114211	0.000760885	-0.817371	ENSRNOG00000017392	Fgf2	fibroblast growth factor 2 [Source:RGD Symbol;Acc:2609]
-0.296307	5.26141	-5.07938	0.000114612	0.000762701	0.657297	ENSRNOG00000033176	Zrsr2	zinc finger (CCCH type), RNA binding motif and serine/arginine rich 2 [Source:RGD Symbol;Acc:1559763]
-0.478826	3.90234	-5.07932	0.000114626	0.000762701	0.883698	ENSRNOG00000023086	LOC100360828	cAMP-regulated phosphoprotein 19-like [Source:RGD Symbol;Acc:2321330]
-0.387687	7.57424	-5.07871	0.000114763	0.000763144	0.516604	ENSRNOG00000007895	Pdhb	pyruvate dehydrogenase E1 subunit beta [Source:RGD Symbol;Acc:1359146]
0.549082	3.44608	5.07829	0.00011486	0.000763315	1.00537	ENSRNOG00000016119	Fzd7	frizzled class receptor 7 [Source:RGD Symbol;Acc:2321905]
-0.28119	7.84452	-5.07668	0.000115231	0.000765306	0.514497	ENSRNOG00000018851	Ppp2r2b	protein phosphatase 2, regulatory subunit B, beta [Source:RGD Symbol;Acc:631441]
-0.319987	7.23582	-5.0722	0.000116267	0.000771709	0.50448	ENSRNOG00000002724	Prpsap2	phosphoribosyl pyrophosphate synthetase-associated protein 2 [Source:RGD Symbol;Acc:620207]
-0.6818	6.96677	-5.06755	0.000117351	0.00077842	0.495186	ENSRNOG00000011358	Hipk3	homeodomain interacting protein kinase 3 [Source:RGD Symbol;Acc:619884]
0.239591	5.65208	5.06234	0.000118578	0.000786077	0.599994	ENSRNOG00000017954	Prelid3a	PRELI domain containing 3A [Source:RGD Symbol;Acc:1582858]
-0.603919	5.60771	-5.06156	0.000118765	0.00078683	0.622567	ENSRNOG00000014798	Cstpp1	centriolar satellite-associated tubulin polyglutamylase complex regulator 1 [Source:RGD Symbol;Acc:1309540]
-0.583367	5.08947	-5.05632	0.000120016	0.000794623	0.622097	ENSRNOG00000003643	Tab3	TGF-beta activated kinase 1 (MAP3K7) binding protein 3 [Source:RGD Symbol;Acc:1594527]
0.760348	2.79958	5.04995	0.000121554	0.000804314	1.18207	ENSRNOG00000012757	Nek3	NIMA-related kinase 3 [Source:RGD Symbol;Acc:1307419]
-0.446959	7.58404	-5.04877	0.00012184	0.000805709	0.455426	ENSRNOG00000019175	Ercc6l2	ERCC excision repair 6 like 2 [Source:RGD Symbol;Acc:1561537]
-1.26895	2.34868	-5.04814	0.000121995	0.000806232	1.31215	ENSRNOG00000015641	Exoc3l1	exocyst complex component 3-like 1 [Source:RGD Symbol;Acc:1311132]
0.45443	4.53715	5.04701	0.00012227	0.000807058	0.768404	ENSRNOG00000024874	Prtfdc1	phosphoribosyl transferase domain containing 1 [Source:RGD Symbol;Acc:1310177]
-0.740037	9.52047	-5.04702	0.000122268	0.000807058	0.482622	ENSRNOG00000029885	Stag2	stromal antigen 2 [Source:RGD Symbol;Acc:1562042]
0.46648	5.50676	5.04503	0.000122755	0.000809763	0.610856	ENSRNOG00000018796	Herpud1	homocysteine inducible ER protein with ubiquitin like domain 1 [Source:RGD Symbol;Acc:620818]
-0.349404	6.44426	-5.04255	0.000123367	0.000812797	0.4655	ENSRNOG00000050441	NA	NA
-0.709633	5.95379	-5.04265	0.000123342	0.000812797	0.483565	ENSRNOG00000016298	Lysmd3	LysM domain containing 3 [Source:RGD Symbol;Acc:1308805]
-0.409582	5.44997	-5.04159	0.000123603	0.000813854	0.558559	ENSRNOG00000016643	Lpcat2	lysophosphatidylcholine acyltransferase 2 [Source:RGD Symbol;Acc:2325051]
0.76405	2.99468	5.04095	0.000123763	0.000814408	1.1529	ENSRNOG00000018841	Sox8	SRY-box transcription factor 8 [Source:RGD Symbol;Acc:1309072]
0.780059	2.30306	5.03996	0.000124008	0.000815516	1.24005	ENSRNOG00000051166	AABR07021503.1	None
-0.235241	7.4884	-5.03754	0.000124609	0.000818519	0.434353	ENSRNOG00000030628	Eif4a1	eukaryotic translation initiation factor 4A1 [Source:RGD Symbol;Acc:735141]
-0.632691	6.3486	-5.03751	0.000124617	0.000818519	0.453682	ENSRNOG00000013946	Rnf149	ring finger protein 149 [Source:RGD Symbol;Acc:1308460]
0.319787	4.99463	5.03711	0.000124717	0.000818675	0.638923	ENSRNOG00000032042	Zfta	zinc finger translocation associated [Source:RGD Symbol;Acc:1560108]
0.663052	3.60631	5.03311	0.000125719	0.000824259	0.956348	ENSRNOG00000010813	Tspan14	tetraspanin 14 [Source:RGD Symbol;Acc:1305714]
-0.710602	6.82788	-5.0331	0.000125721	0.000824259	0.426528	ENSRNOG00000028899	Zbtb33	zinc finger and BTB domain containing 33 [Source:RGD Symbol;Acc:1566309]
0.394103	4.48647	5.03201	0.000125998	0.000825567	0.722369	ENSRNOG00000024751	Macroh2a2	macroH2A.2 histone [Source:RGD Symbol;Acc:1561371]
0.533808	4.79145	5.0251	0.000127752	0.000836039	0.674094	ENSRNOG00000006509	Srgap3	SLIT-ROBO Rho GTPase activating protein 3 [Source:RGD Symbol;Acc:1563152]
-0.603298	7.45177	-5.02512	0.000127748	0.000836039	0.406399	ENSRNOG00000017904	Nol7	nucleolar protein 7 [Source:RGD Symbol;Acc:1565934]
-0.325245	5.5438	-5.02428	0.000127963	0.000836911	0.502648	ENSRNOG00000006941	Thumpd3	THUMP domain containing 3 [Source:RGD Symbol;Acc:1560852]
1.63719	1.26189	5.02372	0.000128107	0.000837173	1.06525	ENSRNOG00000010626	Sphk1	sphingosine kinase 1 [Source:RGD Symbol;Acc:620048]
0.350126	5.76689	5.02351	0.000128159	0.000837173	0.501375	ENSRNOG00000014476	Evl	Enah/Vasp-like [Source:RGD Symbol;Acc:621150]
-0.577693	6.41875	-5.02121	0.000128751	0.000840524	0.415879	ENSRNOG00000020179	Nt5c2	5'-nucleotidase, cytosolic II [Source:RGD Symbol;Acc:2323387]
-0.40106	6.97124	-5.01975	0.000129131	0.000842263	0.400432	ENSRNOG00000019272	Gkap1	G kinase anchoring protein 1 [Source:RGD Symbol;Acc:1306955]
-0.673887	4.28231	-5.01958	0.000129174	0.000842263	0.66829	ENSRNOG00000059442	Pde12	phosphodiesterase 12 [Source:RGD Symbol;Acc:1310975]
0.505865	4.69616	5.01851	0.000129451	0.000843556	0.711026	ENSRNOG00000012362	Cacng3	calcium voltage-gated channel auxiliary subunit gamma 3 [Source:RGD Symbol;Acc:628803]
-0.470332	7.62975	-5.0182	0.000129531	0.000843562	0.392931	ENSRNOG00000017838	Snrnp27	small nuclear ribonucleoprotein U4/U6.U5 subunit 27 [Source:RGD Symbol;Acc:1310925]
0.353207	4.68974	5.01639	0.000130003	0.00084561	0.65124	ENSRNOG00000009267	B3gnt2	UDP-GlcNAc:betaGal beta-1,3-N-acetylglucosaminyltransferase 2 [Source:RGD Symbol;Acc:1310077]
-1.12505	6.19873	-5.01648	0.000129977	0.00084561	0.508329	ENSRNOG00000048226	Hmgn1	high mobility group nucleosome binding domain 1 [Source:RGD Symbol;Acc:1307761]
0.536154	6.06359	5.01513	0.000130332	0.000847234	0.448137	ENSRNOG00000014142	Ogfrl1	opioid growth factor receptor-like 1 [Source:RGD Symbol;Acc:1308498]
0.577958	3.29336	5.00877	0.000132003	0.000857059	0.975697	ENSRNOG00000023812	Raver2	ribonucleoprotein, PTB-binding 2 [Source:RGD Symbol;Acc:1307610]
-0.279436	5.0614	-5.00878	0.000132	0.000857059	0.557899	ENSRNOG00000002813	Dars2	aspartyl-tRNA synthetase 2 (mitochondrial) [Source:RGD Symbol;Acc:1308286]
-0.259702	7.59393	-5.00816	0.000132163	0.000857581	0.373018	ENSRNOG00000011014	Copg2	COPI coat complex subunit gamma 2 [Source:RGD Symbol;Acc:1566215]
0.815003	2.75702	5.00773	0.000132279	0.000857812	1.15284	ENSRNOG00000009264	Erc1	ELKS/RAB6-interacting/CAST family member 1 [Source:RGD Symbol;Acc:628733]
0.307438	4.6912	5.0013	0.000133996	0.00086842	0.622587	ENSRNOG00000031232	Nrp2	neuropilin 2 [Source:RGD Symbol;Acc:621442]
-0.546447	4.51721	-4.99988	0.000134376	0.000870358	0.593077	ENSRNOG00000017233	Mmachc	metabolism of cobalamin associated C [Source:RGD Symbol;Acc:1310806]
-0.330699	6.01719	-4.9993	0.000134533	0.000870851	0.410643	ENSRNOG00000012860	Tmem184c	transmembrane protein 184C [Source:RGD Symbol;Acc:727852]
0.405283	4.96224	4.99669	0.000135239	0.000874891	0.56134	ENSRNOG00000000316	Sobp	sine oculis binding protein homolog [Source:RGD Symbol;Acc:1560479]
0.624474	3.2826	4.9923	0.000136437	0.000881582	0.908691	ENSRNOG00000005770	Sostdc1	sclerostin domain containing 1 [Source:RGD Symbol;Acc:628877]
-0.31653	5.85001	-4.99258	0.000136359	0.000881582	0.417001	ENSRNOG00000045738	Ak4	adenylate kinase 4 [Source:RGD Symbol;Acc:2078]
-0.336741	4.89629	-4.99174	0.000136588	0.000882026	0.54226	ENSRNOG00000004091	Cwc25	CWC25 spliceosome-associated protein homolog [Source:RGD Symbol;Acc:1305258]
-0.858505	2.11434	-4.98986	0.000137107	0.000884842	1.12087	ENSRNOG00000052563	LOC120102747	small nucleolar RNA U89 [Source:RGD Symbol;Acc:41081789]
0.558628	5.22097	4.98658	0.000138013	0.000890039	0.488605	ENSRNOG00000053303	Bend4	BEN domain containing 4 [Source:RGD Symbol;Acc:1584735]
-0.27081	6.47922	-4.98634	0.000138078	0.000890039	0.355872	ENSRNOG00000007402	LOC103694242	60S ribosomal protein L7 pseudogene [Source:RGD Symbol;Acc:9114442]
-0.597019	2.37498	-4.98566	0.000138268	0.000890728	1.0373	ENSRNOG00000000956	Rasl11a	RAS-like family 11 member A [Source:RGD Symbol;Acc:1303231]
-0.495377	4.8518	-4.98358	0.000138845	0.000893906	0.512854	ENSRNOG00000028155	Dnaaf2	dynein, axonemal, assembly factor 2 [Source:RGD Symbol;Acc:1310311]
0.791302	4.93629	4.98215	0.000139244	0.000895939	0.624701	ENSRNOG00000008425	Nav1	neuron navigator 1 [Source:RGD Symbol;Acc:1590261]
0.288983	4.74102	4.98083	0.000139614	0.000897782	0.563573	ENSRNOG00000017272	Mrps27	mitochondrial ribosomal protein S27 [Source:RGD Symbol;Acc:1311829]
-0.830865	3.44486	-4.97933	0.000140035	0.00089995	0.730144	ENSRNOG00000038330	C2h4orf33	similar to human chromosome 4 open reading frame 33 [Source:RGD Symbol;Acc:1359508]
0.238388	7.03565	4.97801	0.000140408	0.000900997	0.325746	ENSRNOG00000012283	Chrna6	cholinergic receptor nicotinic alpha 6 subunit [Source:RGD Symbol;Acc:69281]
-0.59314	10.2927	-4.97844	0.000140287	0.000900997	0.365188	ENSRNOG00000048795	Top2b	DNA topoisomerase II beta [Source:RGD Symbol;Acc:1586156]
-0.75797	1.97504	-4.97786	0.00014045	0.000900997	1.13269	ENSRNOG00000055677	LOC681303	similar to tumor endothelial marker 8 isoform 1 precursor [Source:RGD Symbol;Acc:1596785]
-0.821321	8.73007	-4.97669	0.00014078	0.000902571	0.321512	ENSRNOG00000057464	Fmr1	fragile X messenger ribonucleoprotein 1 [Source:RGD Symbol;Acc:2623]
0.65631	2.39343	4.97485	0.0001413	0.000905369	1.11363	ENSRNOG00000002312	Atp10d	ATPase phospholipid transporting 10D (putative) [Source:RGD Symbol;Acc:1588541]
-0.756273	3.67317	-4.97366	0.00014164	0.000907001	0.706982	ENSRNOG00000054806	NA	NA
2.7816	1.09244	4.97328	0.000141747	0.000907147	0.854801	ENSRNOG00000005214	Plek	pleckstrin [Source:RGD Symbol;Acc:1308269]
0.604425	5.54592	4.97122	0.000142335	0.000910367	0.448065	ENSRNOG00000058645	Tnc	tenascin C [Source:RGD Symbol;Acc:621057]
0.504154	3.85963	4.97003	0.000142677	0.000912008	0.713345	ENSRNOG00000029244	Pcdhb10	protocadherin beta 10 [Source:RGD Symbol;Acc:1308364]
0.476434	5.07074	4.96771	0.000143343	0.000915725	0.486558	ENSRNOG00000030759	Nhs	NHS actin remodeling regulator [Source:RGD Symbol;Acc:1561818]
-1.01481	1.55113	-4.96327	0.000144627	0.000923377	1.11447	ENSRNOG00000050249	LOC102551633	sperm motility kinase W-like [Source:RGD Symbol;Acc:7576862]
0.358592	4.78965	4.96082	0.000145341	0.000927379	0.536303	ENSRNOG00000043171	Ier3ip1	immediate early response 3 interacting protein 1 [Source:RGD Symbol;Acc:155663513]
-0.347167	4.51955	-4.95988	0.000145616	0.000928585	0.548607	ENSRNOG00000016239	Ptgr3	prostaglandin reductase 3 [Source:RGD Symbol;Acc:1309999]
0.608332	3.40293	4.95829	0.000146084	0.000931013	0.818956	ENSRNOG00000024457	Cyct	cytochrome c, testis [Source:RGD Symbol;Acc:2452]
0.365589	5.3452	4.95787	0.000146207	0.000931248	0.415694	ENSRNOG00000024533	Eogt	EGF domain specific O-linked N-acetylglucosamine transferase [Source:RGD Symbol;Acc:1359357]
0.69932	3.8367	4.95728	0.000146379	0.000931537	0.685814	ENSRNOG00000024799	Cd93	CD93 molecule [Source:RGD Symbol;Acc:621251]
-0.517369	4.37172	-4.95712	0.000146426	0.000931537	0.540206	ENSRNOG00000026328	Gpr137c	G protein-coupled receptor 137C [Source:RGD Symbol;Acc:1563070]
0.449457	8.68821	4.95671	0.000146548	0.00093176	0.276994	ENSRNOG00000004067	Nrcam	neuronal cell adhesion molecule [Source:RGD Symbol;Acc:3209]
0.528116	3.40432	4.95438	0.000147236	0.000935164	0.787375	ENSRNOG00000017783	Sfrp1	secreted frizzled-related protein 1 [Source:RGD Symbol;Acc:621074]
0.488292	7.88006	4.9543	0.000147258	0.000935164	0.273884	ENSRNOG00000021182	Sv2a	synaptic vesicle glycoprotein 2a [Source:RGD Symbol;Acc:619715]
0.68902	4.31089	4.95303	0.000147637	0.000937016	0.677361	ENSRNOG00000060105	Astn2	astrotactin 2 [Source:RGD Symbol;Acc:2320342]
0.868195	5.17486	4.95265	0.000147749	0.000937172	0.531342	ENSRNOG00000027770	Trpm3	transient receptor potential cation channel, subfamily M, member 3 [Source:RGD Symbol;Acc:1304888]
-0.72601	8.17883	-4.9521	0.000147913	0.000937656	0.262548	ENSRNOG00000060479	Sp3	Sp3 transcription factor [Source:RGD Symbol;Acc:1583765]
-0.320694	6.22344	-4.94792	0.000149162	0.000945016	0.285485	ENSRNOG00000003873	Cpd	carboxypeptidase D [Source:RGD Symbol;Acc:2393]
-0.654304	4.77023	-4.94726	0.000149359	0.000945706	0.440544	ENSRNOG00000004572	Zfp472	zinc finger protein 472 [Source:RGD Symbol;Acc:727944]
0.430856	4.95963	4.94673	0.00014952	0.000946169	0.455462	ENSRNOG00000013552	Scd	stearoyl-CoA desaturase [Source:RGD Symbol;Acc:621176]
-0.235458	7.24805	-4.9451	0.00015001	0.000947589	0.246233	ENSRNOG00000010711	Dicer1	dicer 1 ribonuclease III [Source:RGD Symbol;Acc:1309381]
-0.263902	7.57833	-4.94522	0.000149975	0.000947589	0.244017	ENSRNOG00000017781	Dnajc7	DnaJ heat shock protein family (Hsp40) member C7 [Source:RGD Symbol;Acc:1303226]
-1.00885	4.1034	-4.94555	0.000149873	0.000947589	0.535768	ENSRNOG00000046153	NA	NA
1.09743	1.97638	4.94393	0.000150364	0.000949268	1.15127	ENSRNOG00000056772	Col4a6	collagen type IV alpha 6 chain [Source:RGD Symbol;Acc:1589724]
0.880885	4.44921	4.94182	0.000151003	0.000952738	0.586378	ENSRNOG00000021201	Txnip	thioredoxin interacting protein [Source:RGD Symbol;Acc:620886]
0.829643	3.19135	4.94045	0.000151419	0.000954704	0.945385	ENSRNOG00000016281	Col4a1	collagen type IV alpha 1 chain [Source:RGD Symbol;Acc:1307148]
-0.313452	3.78557	-4.94021	0.000151492	0.000954704	0.64082	ENSRNOG00000059059	Skp2	S-phase kinase associated protein 2 [Source:RGD Symbol;Acc:1562456]
-0.407811	5.64028	-4.93679	0.000152542	0.00096071	0.307721	ENSRNOG00000011114	Tbpl1	TATA-box binding protein like 1 [Source:RGD Symbol;Acc:1597456]
-0.624467	6.20589	-4.93652	0.000152624	0.00096071	0.253908	ENSRNOG00000016692	Hsdl2	hydroxysteroid dehydrogenase like 2 [Source:RGD Symbol;Acc:1305387]
0.756221	3.68017	4.93445	0.00015326	0.000964147	0.790538	ENSRNOG00000033217	Esam	endothelial cell adhesion molecule [Source:RGD Symbol;Acc:1303286]
0.523519	3.78201	4.93207	0.000153995	0.000967636	0.658463	ENSRNOG00000011720	L3mbtl3	L3MBTL histone methyl-lysine binding protein 3 [Source:RGD Symbol;Acc:1305474]
-0.346601	5.37826	-4.93224	0.000153943	0.000967636	0.340867	ENSRNOG00000010783	Mak16	MAK16 homolog [Source:RGD Symbol;Acc:1311297]
-0.559253	6.6362	-4.93174	0.000154099	0.000967718	0.224644	ENSRNOG00000061236	NA	NA
-0.213399	7.10287	-4.92974	0.000154722	0.000971065	0.217969	ENSRNOG00000004068	Ncoa1	nuclear receptor coactivator 1 [Source:RGD Symbol;Acc:1309046]
-0.201557	8.63883	-4.929	0.00015495	0.000971458	0.219696	ENSRNOG00000051671	Herc1	HECT and RLD domain containing E3 ubiquitin protein ligase family member 1 [Source:RGD Symbol;Acc:1306366]
-0.393988	5.92074	-4.92866	0.000155056	0.000971458	0.267067	ENSRNOG00000002721	Ndufb4	NADH:ubiquinone oxidoreductase subunit B4 [Source:RGD Symbol;Acc:1307072]
-0.504346	7.89593	-4.92879	0.000155018	0.000971458	0.211344	ENSRNOG00000021492	Rbbp4	RB binding protein 4, chromatin remodeling factor [Source:RGD Symbol;Acc:1593768]
-0.24072	7.32281	-4.92804	0.000155252	0.000972115	0.209498	ENSRNOG00000008912	Aqr	aquarius intron-binding spliceosomal factor [Source:RGD Symbol;Acc:1306223]
0.319869	4.98379	4.9273	0.000155484	0.000973003	0.424214	ENSRNOG00000034075	Ube2ql1	ubiquitin-conjugating enzyme E2Q family-like 1 [Source:RGD Symbol;Acc:1598121]
0.598892	4.45959	4.92613	0.000155851	0.000974725	0.521991	ENSRNOG00000026861	Zscan18	zinc finger and SCAN domain containing 18 [Source:RGD Symbol;Acc:1560671]
-0.359541	5.79955	-4.92389	0.000156556	0.000978565	0.282388	ENSRNOG00000004735	Gzf1	GDNF-inducible zinc finger protein 1 [Source:RGD Symbol;Acc:1562321]
-0.387488	6.88334	-4.923	0.000156834	0.000979734	0.212078	ENSRNOG00000005411	Aftph	aftiphilin [Source:RGD Symbol;Acc:1311920]
1.33442	2.01555	4.92104	0.000157457	0.000983052	1.10863	ENSRNOG00000011276	Tmem254	transmembrane protein 254 [Source:RGD Symbol;Acc:1305689]
-0.562878	8.40639	-4.92053	0.000157618	0.000983487	0.199962	ENSRNOG00000004477	Ublcp1	ubiquitin-like domain containing CTD phosphatase 1 [Source:RGD Symbol;Acc:1310386]
0.95434	1.50023	4.91986	0.000157832	0.000984251	1.10651	ENSRNOG00000002664	Emp2	epithelial membrane protein 2 [Source:RGD Symbol;Acc:1359629]
-0.736187	7.08074	-4.91932	0.000158004	0.000984748	0.190274	ENSRNOG00000006364	Dld	dihydrolipoamide dehydrogenase [Source:RGD Symbol;Acc:735073]
1.07787	1.81483	4.9174	0.000158615	0.000987983	1.09707	ENSRNOG00000029756	P2ry13	purinergic receptor P2Y13 [Source:RGD Symbol;Acc:1302941]
-0.474483	3.79684	-4.91648	0.00015891	0.00098876	0.596496	ENSRNOG00000005576	Rpia	ribose 5-phosphate isomerase A [Source:RGD Symbol;Acc:1311377]
-0.661088	7.04962	-4.91643	0.000158924	0.00098876	0.18433	ENSRNOG00000012558	Orc2	origin recognition complex, subunit 2 [Source:RGD Symbol;Acc:1311844]
-1.45684	1.14403	-4.9151	0.000159352	0.000990845	1.07839	ENSRNOG00000028477	Med8	mediator complex subunit 8 [Source:RGD Symbol;Acc:1305552]
1.11057	3.7609	4.91337	0.000159909	0.000992586	0.805155	ENSRNOG00000020813	Ltbp3	latent transforming growth factor beta binding protein 3 [Source:RGD Symbol;Acc:62057]
-0.481944	5.27275	-4.91383	0.00015976	0.000992586	0.304095	ENSRNOG00000049062	Trappc2b	trafficking protein particle complex 2B [Source:RGD Symbol;Acc:6499350]
-0.846804	6.72211	-4.91358	0.00015984	0.000992586	0.182162	ENSRNOG00000007203	Psmc6	proteasome 26S subunit, ATPase 6 [Source:RGD Symbol;Acc:1308825]
-0.324036	5.60327	-4.91228	0.000160261	0.000994194	0.283914	ENSRNOG00000019439	Polr2g	RNA polymerase II subunit G [Source:RGD Symbol;Acc:621284]
-0.321376	5.48412	-4.91158	0.000160487	0.000995022	0.283697	ENSRNOG00000037715	Actmap	actin maturation protease [Source:RGD Symbol;Acc:1560854]
-0.373915	3.58113	-4.90885	0.000161372	0.00099993	0.609242	ENSRNOG00000009220	Tmem17	transmembrane protein 17 [Source:RGD Symbol;Acc:1310566]
-0.614013	4.11365	-4.90546	0.00016248	0.00100621	0.46377	ENSRNOG00000018063	Rad1	RAD1 checkpoint DNA exonuclease [Source:RGD Symbol;Acc:1306496]
-0.689732	5.42628	-4.90368	0.000163064	0.00100925	0.334218	ENSRNOG00000056955	Bicdl1	BICD family like cargo adaptor 1 [Source:RGD Symbol;Acc:1310292]
-0.319021	4.77735	-4.90224	0.000163537	0.00101159	0.368561	ENSRNOG00000019473	Dcun1d2	defective in cullin neddylation 1 domain containing 2 [Source:RGD Symbol;Acc:1582994]
0.441473	5.95412	4.90185	0.000163667	0.00101181	0.222616	ENSRNOG00000031398	Mab21l2	mab-21 like 2 [Source:RGD Symbol;Acc:1595520]
-0.60923	4.52378	-4.90095	0.000163966	0.00101307	0.449858	ENSRNOG00000011332	Clspn	claspin [Source:RGD Symbol;Acc:1309083]
-0.320485	6.65524	-4.89905	0.000164593	0.00101637	0.161049	ENSRNOG00000060262	Prps1	phosphoribosyl pyrophosphate synthetase 1 [Source:RGD Symbol;Acc:61955]
-0.300688	4.93782	-4.89876	0.000164691	0.00101638	0.343167	ENSRNOG00000057372	NA	NA
0.483418	4.52294	4.89811	0.000164907	0.00101713	0.483267	ENSRNOG00000008082	Rgs6	regulator of G-protein signaling 6 [Source:RGD Symbol;Acc:3569]
0.751998	3.40811	4.89634	0.000165495	0.00101959	0.81525	ENSRNOG00000012630	Rhoc	ras homolog family member C [Source:RGD Symbol;Acc:1304965]
-0.296531	6.38875	-4.89659	0.000165414	0.00101959	0.173759	ENSRNOG00000003461	Zfp330	zinc finger protein 330 [Source:RGD Symbol;Acc:1307510]
0.372458	4.23092	4.8937	0.000166378	0.00102444	0.495449	ENSRNOG00000009646	Nyx	nyctalopin [Source:RGD Symbol;Acc:1561300]
-0.254552	6.05708	-4.89338	0.000166487	0.00102452	0.192254	ENSRNOG00000029304	Aggf1	angiogenic factor with G patch and FHA domains 1 [Source:RGD Symbol;Acc:1310888]
0.612082	2.98944	4.89225	0.000166869	0.00102628	0.783629	ENSRNOG00000052506	Ak3	adenylate kinase 3 [Source:RGD Symbol;Acc:619885]
-0.490642	5.51552	-4.89159	0.000167089	0.00102705	0.225408	ENSRNOG00000015573	Ctbs	chitobiase [Source:RGD Symbol;Acc:621338]
-0.537016	4.12014	-4.88801	0.000168301	0.0010339	0.447037	ENSRNOG00000014212	Mettl21a	methyltransferase 21A, HSPA lysine [Source:RGD Symbol;Acc:7651604]
-0.485919	8.20911	-4.88304	0.00017	0.00104375	0.119953	ENSRNOG00000042848	Jam2	junctional adhesion molecule 2 [Source:RGD Symbol;Acc:1561692]
0.943929	4.78169	4.87949	0.000171222	0.00105064	0.46057	ENSRNOG00000032410	Mtus2	microtubule associated scaffold protein 2 [Source:RGD Symbol;Acc:1562533]
-0.529134	3.8975	-4.8792	0.000171322	0.00105066	0.458579	ENSRNOG00000004145	Prorsd1	prolyl-tRNA synthetase associated domain containing 1 [Source:RGD Symbol;Acc:1308179]
-0.260308	6.82712	-4.8762	0.000172364	0.00105625	0.109878	ENSRNOG00000003795	Angel2	angel homolog 2 [Source:RGD Symbol;Acc:1305056]
-0.471595	6.06085	-4.87601	0.00017243	0.00105625	0.182445	ENSRNOG00000018518	Prr14	proline rich 14 [Source:RGD Symbol;Acc:1594592]
-0.437457	4.96372	-4.87504	0.000172767	0.00105771	0.264964	ENSRNOG00000011461	Ap3m1	adaptor related protein complex 3 subunit mu 1 [Source:RGD Symbol;Acc:620417]
-0.30761	5.8976	-4.87364	0.000173255	0.00106009	0.161528	ENSRNOG00000012841	Alg11	ALG11, alpha-1,2-mannosyltransferase [Source:RGD Symbol;Acc:1564725]
-0.408649	6.80882	-4.87293	0.000173506	0.00106041	0.100796	ENSRNOG00000031203	Scfd1	sec1 family domain containing 1 [Source:RGD Symbol;Acc:619828]
-0.472168	3.76895	-4.87301	0.000173477	0.00106041	0.504504	ENSRNOG00000011028	AABR07054096.1	cilia and flagella associated protein 61 [Source:RGD Symbol;Acc:1311519]
-0.318311	7.63008	-4.87173	0.000173926	0.00106238	0.0923047	ENSRNOG00000014331	Zfp717	zinc finger protein 717 [Source:RGD Symbol;Acc:2319964]
-0.293946	8.82886	-4.86766	0.000175364	0.00107033	0.0965382	ENSRNOG00000004207	Eml5	EMAP like 5 [Source:RGD Symbol;Acc:1303275]
-0.699652	6.273	-4.86747	0.000175428	0.00107033	0.10317	ENSRNOG00000040279	Slf1	SMC5-SMC6 complex localization factor 1 [Source:RGD Symbol;Acc:1304857]
-0.495018	5.17329	-4.86664	0.000175723	0.00107051	0.222214	ENSRNOG00000016186	Zfp709	zinc finger protein 709 [Source:RGD Symbol;Acc:628698]
-0.613033	7.04389	-4.86663	0.000175727	0.00107051	0.0817421	ENSRNOG00000051756	Zfp62	zinc finger protein 62 [Source:RGD Symbol;Acc:1560191]
-0.626559	4.95427	-4.86655	0.000175757	0.00107051	0.266241	ENSRNOG00000014139	Sclt1	sodium channel and clathrin linker 1 [Source:RGD Symbol;Acc:628721]
0.433819	3.09169	4.86472	0.000176407	0.00107325	0.680032	ENSRNOG00000016737	Tcerg1l	transcription elongation regulator 1-like [Source:RGD Symbol;Acc:1562437]
-0.289285	5.41521	-4.8649	0.000176342	0.00107325	0.200307	ENSRNOG00000023509	Irs2	insulin receptor substrate 2 [Source:RGD Symbol;Acc:69316]
1.7398	2.00336	4.86408	0.000176637	0.00107404	0.995636	ENSRNOG00000037371	Xaf1	XIAP associated factor 1 [Source:RGD Symbol;Acc:1585988]
-0.511913	6.52523	-4.86297	0.000177032	0.00107523	0.0906774	ENSRNOG00000026239	Arid4a	AT-rich interaction domain 4A [Source:RGD Symbol;Acc:1307442]
-0.741989	6.23359	-4.86318	0.000176958	0.00107523	0.100649	ENSRNOG00000014456	Coq10b	coenzyme Q10B [Source:RGD Symbol;Acc:1359509]
0.748248	2.12038	4.86152	0.000177554	0.00107738	0.911247	ENSRNOG00000001807	Sspn	sarcospan [Source:RGD Symbol;Acc:1559723]
-0.429042	6.66477	-4.86142	0.000177589	0.00107738	0.0817347	ENSRNOG00000053659	C1h11orf58	similar to human chromosome 11 open reading frame 58 [Source:RGD Symbol;Acc:1311703]
-0.48205	7.96622	-4.86067	0.000177858	0.00107841	0.0716206	ENSRNOG00000015692	Taok1	TAO kinase 1 [Source:RGD Symbol;Acc:708455]
-0.320739	5.26211	-4.86038	0.000177962	0.00107843	0.212865	ENSRNOG00000019109	Thap11	THAP domain containing 11 [Source:RGD Symbol;Acc:1310268]
0.480635	3.4121	4.85874	0.000178551	0.00108139	0.639786	ENSRNOG00000013304	Arg1	arginase 1 [Source:RGD Symbol;Acc:2150]
-0.259845	6.82035	-4.85755	0.000178982	0.00108277	0.0785401	ENSRNOG00000005538	Psmd11	proteasome 26S subunit, non-ATPase 11 [Source:RGD Symbol;Acc:1306450]
-0.28834	4.68847	-4.85775	0.000178911	0.00108277	0.319508	ENSRNOG00000017993	Abcb10	ATP binding cassette subfamily B member 10 [Source:RGD Symbol;Acc:1311222]
-0.663588	2.88926	-4.8557	0.000179654	0.00108623	0.609753	ENSRNOG00000037124	Fam227b	family with sequence similarity 227, member B [Source:RGD Symbol;Acc:1359452]
-0.486866	7.40752	-4.85289	0.000180678	0.0010918	0.052634	ENSRNOG00000005387	Rbm3	RNA binding motif protein 3 [Source:RGD Symbol;Acc:620145]
0.668707	3.42452	4.85216	0.000180944	0.00109252	0.676331	ENSRNOG00000004458	Ston2	stonin 2 [Source:RGD Symbol;Acc:1311502]
0.383831	6.19859	4.85201	0.000180999	0.00109252	0.125178	ENSRNOG00000036798	Dusp3	dual specificity phosphatase 3 [Source:RGD Symbol;Acc:1560049]
-0.72968	4.29359	-4.85027	0.000181638	0.00109575	0.311424	ENSRNOG00000008309	Rpa3	replication protein A3 [Source:RGD Symbol;Acc:1306810]
0.924845	4.53874	4.84995	0.000181754	0.00109583	0.423286	ENSRNOG00000032660	NA	NA
-0.620864	6.40273	-4.84363	0.000184093	0.00110931	0.0525063	ENSRNOG00000014515	Cdc14a	cell division cycle 14A [Source:RGD Symbol;Acc:1304649]
-0.530172	4.85895	-4.84185	0.000184758	0.00111158	0.221951	ENSRNOG00000027326	Tada2b	transcriptional adaptor 2B [Source:RGD Symbol;Acc:1561605]
-0.752958	7.50007	-4.84179	0.00018478	0.00111158	0.0298927	ENSRNOG00000006749	Tmtc3	transmembrane O-mannosyltransferase targeting cadherins 3 [Source:RGD Symbol;Acc:1306351]
-0.861293	1.79139	-4.84204	0.000184688	0.00111158	0.865723	ENSRNOG00000006731	Spc25	SPC25 component of NDC80 kinetochore complex [Source:RGD Symbol;Acc:1307811]
-0.543299	7.15267	-4.83714	0.000186527	0.00112146	0.0206281	ENSRNOG00000060349	Fam3c	FAM3 metabolism regulating signaling molecule C [Source:RGD Symbol;Acc:735193]
-0.473763	6.39831	-4.83673	0.000186683	0.00112177	0.0415973	ENSRNOG00000019723	Cpne1	copine 1 [Source:RGD Symbol;Acc:1311148]
-0.401128	7.75864	-4.83543	0.000187176	0.0011241	0.0178307	ENSRNOG00000010591	Kdm5a	lysine demethylase 5A [Source:RGD Symbol;Acc:1305429]
-0.536352	4.43345	-4.83351	0.000187902	0.0011272	0.272752	ENSRNOG00000019455	Ap4b1	adaptor related protein complex 4 subunit beta 1 [Source:RGD Symbol;Acc:1310529]
-0.713162	5.36391	-4.83359	0.000187871	0.0011272	0.116749	ENSRNOG00000018808	Vip	vasoactive intestinal peptide [Source:RGD Symbol;Acc:621647]
-0.694953	6.16232	-4.83309	0.000188065	0.00112755	0.037746	ENSRNOG00000008075	Ift74	intraflagellar transport 74 [Source:RGD Symbol;Acc:1359704]
0.945248	1.98906	4.83087	0.000188909	0.00113198	0.894294	ENSRNOG00000000906	Medag	mesenteric estrogen-dependent adipogenesis [Source:RGD Symbol;Acc:1307396]
0.765114	4.04999	4.82893	0.000189654	0.00113271	0.503809	ENSRNOG00000015220	Crtac1	cartilage acidic protein 1 [Source:RGD Symbol;Acc:621085]
0.375299	7.62951	4.8289	0.000189665	0.00113271	0.0107933	ENSRNOG00000003707	Zmym3	zinc finger MYM-type containing 3 [Source:RGD Symbol;Acc:1564967]
-0.424626	8.39631	-4.82969	0.000189363	0.00113271	0.0123108	ENSRNOG00000015540	Ppp6r3	protein phosphatase 6, regulatory subunit 3 [Source:RGD Symbol;Acc:1307145]
-0.44245	5.64478	-4.83	0.000189244	0.00113271	0.0893742	ENSRNOG00000010825	Snapc3	small nuclear RNA activating complex, polypeptide 3 [Source:RGD Symbol;Acc:1305172]
-0.443309	5.59377	-4.83012	0.000189197	0.00113271	0.0917428	ENSRNOG00000037160	Bloc1s6	biogenesis of lysosomal organelles complex 1 subunit 6 [Source:RGD Symbol;Acc:1310208]
-0.504427	4.18015	-4.82896	0.00018964	0.00113271	0.321912	ENSRNOG00000017741	Nudt5	nudix hydrolase 5 [Source:RGD Symbol;Acc:1359284]
-0.55561	6.56722	-4.82723	0.000190306	0.00113591	0.0119366	ENSRNOG00000043370	Fubp1	far upstream element binding protein 1 [Source:RGD Symbol;Acc:1591892]
1.00244	4.22412	4.82602	0.000190776	0.00113789	0.339296	ENSRNOG00000019478	Irf9	interferon regulatory factor 9 [Source:RGD Symbol;Acc:1308766]
0.527651	4.21766	4.82582	0.00019085	0.00113789	0.334121	ENSRNOG00000012721	Ednra	endothelin receptor type A [Source:RGD Symbol;Acc:2535]
0.806328	2.89649	4.8252	0.000191094	0.00113871	0.651238	ENSRNOG00000009401	Lmo2	LIM domain only 2 [Source:RGD Symbol;Acc:1307101]
0.932183	2.86265	4.82452	0.000191353	0.00113913	0.702401	ENSRNOG00000031004	Cyp2j3	cytochrome P450, family 2, subfamily j, polypeptide 3 [Source:RGD Symbol;Acc:631442]
0.568752	6.21177	4.82419	0.000191483	0.00113913	0.0992528	ENSRNOG00000047505	Tubb4a	tubulin, beta 4A class IVa [Source:RGD Symbol;Acc:619730]
-0.478186	6.90543	-4.82443	0.000191389	0.00113913	-0.00310187	ENSRNOG00000001598	Usp16	ubiquitin specific peptidase 16 [Source:RGD Symbol;Acc:1307192]
-0.389488	3.67407	-4.82218	0.000192265	0.00114315	0.392805	ENSRNOG00000025252	Yars2	tyrosyl-tRNA synthetase 2 [Source:RGD Symbol;Acc:1311696]
0.897582	5.79307	4.82131	0.000192602	0.00114414	0.0758279	ENSRNOG00000005048	Trhr	thyrotropin releasing hormone receptor [Source:RGD Symbol;Acc:3904]
0.524838	4.13086	4.8212	0.000192646	0.00114414	0.408178	ENSRNOG00000005592	Brinp2	BMP/retinoic acid inducible neural specific 2 [Source:RGD Symbol;Acc:708419]
0.52533	4.77014	4.81931	0.000193384	0.00114789	0.224701	ENSRNOG00000005686	Suclg2	succinate-CoA ligase GDP-forming subunit beta [Source:RGD Symbol;Acc:1305008]
-0.607204	6.66996	-4.81751	0.00019409	0.00115144	-0.0137589	ENSRNOG00000005753	LOC108349244	putative bifunctional UDP-N-acetylglucosamine transferase and deubiquitinase ALG13 [Source:RGD Symbol;Acc:11453602]
-0.321413	5.22396	-4.81468	0.00019521	0.00115744	0.119315	ENSRNOG00000007817	Kctd6	potassium channel tetramerization domain containing 6 [Source:RGD Symbol;Acc:1308208]
-0.266245	5.49388	-4.81317	0.000195807	0.00116034	0.100404	ENSRNOG00000008891	Ift20	intraflagellar transport 20 [Source:RGD Symbol;Acc:1309400]
0.288325	5.60132	4.81261	0.00019603	0.00116103	0.0915107	ENSRNOG00000009983	Lrrc42	leucine rich repeat containing 42 [Source:RGD Symbol;Acc:1308919]
0.368758	4.53306	4.80517	0.000199009	0.00117802	0.256874	ENSRNOG00000009372	Tacr3	tachykinin receptor 3 [Source:RGD Symbol;Acc:3810]
0.644155	2.65639	4.80334	0.000199745	0.00118172	0.750994	ENSRNOG00000002852	Myo19	myosin XIX [Source:RGD Symbol;Acc:1559961]
0.519219	4.54579	4.80306	0.000199861	0.00118176	0.289887	ENSRNOG00000005438	Pcsk2	proprotein convertase subtilisin/kexin type 2 [Source:RGD Symbol;Acc:3273]
1.0894	1.5413	4.79929	0.000201395	0.00118969	0.878305	ENSRNOG00000039745	Pm20d1	peptidase M20 domain containing 1 [Source:RGD Symbol;Acc:1564063]
0.863238	2.19299	4.79921	0.000201425	0.00118969	0.803186	ENSRNOG00000045558	Cd34	CD34 molecule [Source:RGD Symbol;Acc:1306863]
0.599871	3.09088	4.79393	0.000203597	0.0012012	0.546315	ENSRNOG00000028156	Pld1	phospholipase D1 [Source:RGD Symbol;Acc:3349]
-0.805487	5.57442	-4.79412	0.000203518	0.0012012	0.0124386	ENSRNOG00000006340	Memo1	mediator of cell motility 1 [Source:RGD Symbol;Acc:1309929]
0.843068	5.19137	4.79332	0.000203848	0.00120202	0.215798	ENSRNOG00000018220	Pde4dip	phosphodiesterase 4D interacting protein [Source:RGD Symbol;Acc:708410]
0.441148	7.89114	4.79274	0.000204088	0.00120278	-0.068903	ENSRNOG00000010748	Mtus1	microtubule associated scaffold protein 1 [Source:RGD Symbol;Acc:631381]
-0.598782	10.4563	-4.78896	0.000205661	0.00121138	-0.0187399	ENSRNOG00000043006	Epm2aip1	EPM2A interacting protein 1 [Source:RGD Symbol;Acc:1310977]
-0.330943	5.75927	-4.78841	0.000205891	0.00121207	-0.00110137	ENSRNOG00000021628	Wdr89	WD repeat domain 89 [Source:RGD Symbol;Acc:1307393]
-0.278421	4.71432	-4.7871	0.000206437	0.00121461	0.147147	ENSRNOG00000007785	Trmt5	tRNA methyltransferase 5 [Source:RGD Symbol;Acc:1306567]
0.381115	6.16908	4.78586	0.000206958	0.00121568	-0.0233316	ENSRNOG00000014030	Synm	synemin [Source:RGD Symbol;Acc:727872]
-0.374598	10.2268	-4.78634	0.000206756	0.00121568	-0.0342132	ENSRNOG00000011160	Sv2b	synaptic vesicle glycoprotein 2b [Source:RGD Symbol;Acc:619716]
-0.399297	6.67067	-4.78588	0.000206949	0.00121568	-0.0766447	ENSRNOG00000003825	Wdr75	WD repeat domain 75 [Source:RGD Symbol;Acc:1564869]
0.833809	3.09715	4.78526	0.00020721	0.00121583	0.654416	ENSRNOG00000003841	Kcnh1	potassium voltage-gated channel subfamily H member 1 [Source:RGD Symbol;Acc:68398]
-0.41469	3.86356	-4.78541	0.000207147	0.00121583	0.302802	ENSRNOG00000028941	Zbed3	zinc finger, BED-type containing 3 [Source:RGD Symbol;Acc:1309665]
4.017	2.881	4.78426	0.000207629	0.00121762	0.817142	ENSRNOG00000051158	NA	NA
-0.426976	9.21818	-4.78347	0.000207962	0.00121891	-0.0689155	ENSRNOG00000008393	Tax1bp1	Tax1 binding protein 1 [Source:RGD Symbol;Acc:708579]
0.839225	5.72427	4.78137	0.000208853	0.00122212	0.0657565	ENSRNOG00000023373	Sec24b	SEC24 homolog B, COPII coat complex component [Source:RGD Symbol;Acc:1309358]
-0.419825	7.18705	-4.78177	0.000208681	0.00122212	-0.0935045	ENSRNOG00000011480	Tubgcp5	tubulin, gamma complex associated protein 5 [Source:RGD Symbol;Acc:1304689]
-0.598365	3.06859	-4.7816	0.000208753	0.00122212	0.427077	ENSRNOG00000012270	Med26	mediator complex subunit 26 [Source:RGD Symbol;Acc:1309524]
-0.479481	4.829	-4.77724	0.000210609	0.00123107	0.131097	ENSRNOG00000014543	Tbc1d2b	TBC1 domain family, member 2B [Source:RGD Symbol;Acc:1307436]
-0.790913	3.66384	-4.77724	0.00021061	0.00123107	0.411747	ENSRNOG00000004980	Rangrf	RAN guanine nucleotide release factor [Source:RGD Symbol;Acc:1563195]
1.48646	3.93656	4.77612	0.000211088	0.00123295	0.589284	ENSRNOG00000005041	Crip2	cysteine-rich protein 2 [Source:RGD Symbol;Acc:1302959]
0.215836	5.2724	4.77595	0.000211163	0.00123295	0.0643329	ENSRNOG00000003508	Ergic1	endoplasmic reticulum-golgi intermediate compartment 1 [Source:RGD Symbol;Acc:1585015]
-0.445265	6.12908	-4.77243	0.000212679	0.00124113	-0.0773975	ENSRNOG00000002291	Brwd3	bromodomain and WD repeat domain containing 3 [Source:RGD Symbol;Acc:1559445]
0.357017	3.70943	4.76584	0.000215543	0.00125716	0.318779	ENSRNOG00000048978	Nphp3	nephrocystin 3 [Source:RGD Symbol;Acc:1563856]
-0.467191	8.06126	-4.76556	0.000215666	0.00125719	-0.123785	ENSRNOG00000009956	Wnk1	WNK lysine deficient protein kinase 1 [Source:RGD Symbol;Acc:621141]
1.33138	2.00456	4.76146	0.000217472	0.00126703	0.763213	ENSRNOG00000019179	Ggta1	glycoprotein alpha-galactosyltransferase 1 [Source:RGD Symbol;Acc:629476]
-1.0269	1.50764	-4.75897	0.000218573	0.00127276	0.797853	ENSRNOG00000047401	Gfy	golgi-associated, olfactory signaling regulator [Source:RGD Symbol;Acc:6500406]
0.656836	3.11246	4.75766	0.000219156	0.00127545	0.582517	ENSRNOG00000003049	Hsd17b10	hydroxysteroid (17-beta) dehydrogenase 10 [Source:RGD Symbol;Acc:69231]
0.256958	8.15361	4.75645	0.000219695	0.0012779	-0.141564	ENSRNOG00000019482	Gnao1	G protein subunit alpha o1 [Source:RGD Symbol;Acc:628732]
0.500902	3.82227	4.75351	0.000221011	0.00128451	0.299753	ENSRNOG00000027017	Rnasel	ribonuclease L [Source:RGD Symbol;Acc:727933]
-0.54555	5.40538	-4.75338	0.00022107	0.00128451	-0.0478125	ENSRNOG00000020670	Atrip	ATR interacting protein [Source:RGD Symbol;Acc:1626390]
1.06364	5.76422	4.753	0.00022124	0.0012848	0.0909301	ENSRNOG00000020577	Pip5k1c	phosphatidylinositol-4-phosphate 5-kinase type 1 gamma [Source:RGD Symbol;Acc:1309938]
-0.340398	4.13745	-4.75151	0.000221912	0.001288	0.196567	ENSRNOG00000015551	Fuca2	alpha-L-fucosidase 2 [Source:RGD Symbol;Acc:1303053]
0.57808	3.29871	4.74934	0.000222894	0.001293	0.502859	ENSRNOG00000008706	Tbx3	T-box transcription factor 3 [Source:RGD Symbol;Acc:735203]
-0.36854	6.83698	-4.74823	0.000223399	0.00129523	-0.155735	ENSRNOG00000016921	Klhl11	kelch-like family member 11 [Source:RGD Symbol;Acc:1306673]
-0.245888	6.45079	-4.74564	0.000224577	0.00130136	-0.129037	ENSRNOG00000050790	Dcaf12	DDB1 and CUL4 associated factor 12 [Source:RGD Symbol;Acc:1594034]
-0.267035	8.13678	-4.74428	0.000225202	0.00130427	-0.167575	ENSRNOG00000014689	Zbtb4	zinc finger and BTB domain containing 4 [Source:RGD Symbol;Acc:1307184]
0.720748	3.5448	4.74329	0.000225652	0.00130618	0.406612	ENSRNOG00000018878	Ssh3	slingshot protein phosphatase 3 [Source:RGD Symbol;Acc:1308679]
-0.415518	4.7485	-4.7408	0.000226797	0.00131164	0.0273029	ENSRNOG00000024601	Taf11	TATA-box binding protein associated factor 11 [Source:RGD Symbol;Acc:1305626]
-0.473398	7.02381	-4.74071	0.00022684	0.00131164	-0.177124	ENSRNOG00000019957	Lrig2	leucine-rich repeats and immunoglobulin-like domains 2 [Source:RGD Symbol;Acc:1309554]
-0.42026	4.69983	-4.73938	0.000227457	0.0013145	0.0685459	ENSRNOG00000002254	Tmem33	transmembrane protein 33 [Source:RGD Symbol;Acc:708371]
0.336381	4.68164	4.73808	0.000228057	0.00131682	0.106338	ENSRNOG00000010468	NA	NA
0.252872	5.59987	4.73798	0.000228105	0.00131682	-0.0453668	ENSRNOG00000013287	Sall2	spalt-like transcription factor 2 [Source:RGD Symbol;Acc:1309272]
-0.587676	5.24798	-4.73543	0.000229292	0.00132296	-0.0657717	ENSRNOG00000010795	Cnot4	CCR4-NOT transcription complex, subunit 4 [Source:RGD Symbol;Acc:1310318]
-0.943868	5.54193	-4.73351	0.000230187	0.00132741	-0.12221	ENSRNOG00000013431	Rsbn1l	round spermatid basic protein 1-like [Source:RGD Symbol;Acc:1308748]
0.783926	3.69978	4.73314	0.00023036	0.0013277	0.430393	ENSRNOG00000018830	Aff3	ALF transcription elongation factor 3 [Source:RGD Symbol;Acc:1308527]
-0.558286	7.58204	-4.73263	0.0002306	0.00132837	-0.195722	ENSRNOG00000004415	Togaram1	TOG array regulator of axonemal microtubules 1 [Source:RGD Symbol;Acc:1310474]
0.332252	5.52792	4.73193	0.000230931	0.00132956	-0.0542427	ENSRNOG00000000519	Stk38	serine/threonine kinase 38 [Source:RGD Symbol;Acc:1309455]
0.667661	4.50077	4.73125	0.000231249	0.00133068	0.186731	ENSRNOG00000033653	Mpp3	MAGUK p55 scaffold protein 3 [Source:RGD Symbol;Acc:620015]
2.27408	4.41996	4.73013	0.000231776	0.00133196	0.201216	ENSRNOG00000001963	Mx2	MX dynamin like GTPase 2 [Source:RGD Symbol;Acc:628821]
-0.380914	7.76466	-4.72999	0.000231844	0.00133196	-0.200196	ENSRNOG00000001053	Tmed2	transmembrane p24 trafficking protein 2 [Source:RGD Symbol;Acc:69243]
-0.459256	8.71563	-4.73026	0.000231714	0.00133196	-0.188869	ENSRNOG00000056371	Pik3ca	phosphatidylinositol-4,5-bisphosphate 3-kinase, catalytic subunit alpha [Source:RGD Symbol;Acc:620916]
-0.256206	7.35835	-4.72787	0.000232844	0.00133698	-0.202681	ENSRNOG00000013602	Usp48	ubiquitin specific peptidase 48 [Source:RGD Symbol;Acc:735213]
-0.267899	6.53181	-4.72518	0.000234122	0.0013436	-0.194127	ENSRNOG00000058588	Nfxl1	nuclear transcription factor, X-box binding-like 1 [Source:RGD Symbol;Acc:1359201]
-0.454263	7.51855	-4.7242	0.000234591	0.00134558	-0.213407	ENSRNOG00000059334	Fbxl3	F-box and leucine-rich repeat protein 3 [Source:RGD Symbol;Acc:1305660]
-0.256755	6.7791	-4.72362	0.000234871	0.00134646	-0.199417	ENSRNOG00000006718	Rbm33	RNA binding motif protein 33 [Source:RGD Symbol;Acc:1310651]
0.679095	7.29459	4.72263	0.000235341	0.00134843	-0.195163	ENSRNOG00000047387	NA	NA
-0.489583	3.9215	-4.72134	0.000235964	0.00135128	0.139174	ENSRNOG00000023274	Lrrc28	leucine rich repeat containing 28 [Source:RGD Symbol;Acc:1307209]
0.224586	6.54149	4.7197	0.000236751	0.00135506	-0.180867	ENSRNOG00000021091	Trank1	tetratricopeptide repeat and ankyrin repeat containing 1 [Source:RGD Symbol;Acc:1563130]
-0.719589	8.43176	-4.71767	0.000237732	0.00135996	-0.21816	ENSRNOG00000039994	Upf3b	UPF3B, regulator of nonsense mediated mRNA decay [Source:RGD Symbol;Acc:1560264]
0.519388	6.13199	4.7152	0.000238932	0.00136609	-0.137738	ENSRNOG00000017558	Tubb2a	tubulin, beta 2A class IIa [Source:RGD Symbol;Acc:1588452]
0.496819	6.00244	4.71109	0.000240939	0.00137683	-0.118591	ENSRNOG00000061230	L1cam	L1 cell adhesion molecule [Source:RGD Symbol;Acc:619777]
-0.378244	5.85225	-4.71082	0.000241074	0.00137687	-0.1453	ENSRNOG00000000524	RGD735065	similar to GI:13385412-like protein splice form I [Source:RGD Symbol;Acc:735065]
-0.259575	6.17739	-4.71014	0.000241406	0.00137803	-0.192954	ENSRNOG00000009566	Phf12	PHD finger protein 12 [Source:RGD Symbol;Acc:1305731]
0.516265	5.17218	4.70786	0.000242529	0.00138307	0.0195343	ENSRNOG00000009350	Sez6	seizure related 6 homolog [Source:RGD Symbol;Acc:619780]
0.286274	4.59775	4.70783	0.000242546	0.00138307	0.026758	ENSRNOG00000019464	Ttc9c	tetratricopeptide repeat domain 9C [Source:RGD Symbol;Acc:1359253]
-0.257195	7.44148	-4.70599	0.000243457	0.00138752	-0.249901	ENSRNOG00000013841	Dcaf1	DDB1 and CUL4 associated factor 1 [Source:RGD Symbol;Acc:1305176]
-0.509082	6.7569	-4.70546	0.000243717	0.00138827	-0.246203	ENSRNOG00000027923	Mynn	myoneurin [Source:RGD Symbol;Acc:1307889]
-0.518937	2.4404	-4.70439	0.000244249	0.00139056	0.411952	ENSRNOG00000000378	NA	NA
-0.348336	8.51697	-4.70387	0.000244513	0.00139132	-0.246977	ENSRNOG00000013505	Vdac2	voltage-dependent anion channel 2 [Source:RGD Symbol;Acc:621576]
-0.654207	3.65185	-4.70228	0.000245306	0.0013951	0.142389	ENSRNOG00000010316	Magohb	mago homolog B, exon junction complex subunit [Source:RGD Symbol;Acc:1597384]
0.711166	7.23348	4.70112	0.000245886	0.00139765	-0.21765	ENSRNOG00000047781	Slc25a23	solute carrier family 25 member 23 [Source:RGD Symbol;Acc:1588586]
-0.312505	7.30175	-4.70061	0.00024614	0.00139836	-0.2609	ENSRNOG00000024194	Rsf1	remodeling and spacing factor 1 [Source:RGD Symbol;Acc:1311245]
-0.410876	5.65339	-4.70001	0.000246443	0.00139933	-0.144784	ENSRNOG00000006983	Nr2c1	nuclear receptor subfamily 2, group C, member 1 [Source:RGD Symbol;Acc:3200]
0.75818	4.74403	4.69946	0.000246716	0.00140015	0.0904524	ENSRNOG00000017078	Selenon	selenoprotein N [Source:RGD Symbol;Acc:1304574]
-0.69045	5.40348	-4.69852	0.000247193	0.00140211	-0.164698	ENSRNOG00000021384	Ankrd44	ankyrin repeat domain 44 [Source:RGD Symbol;Acc:1561893]
-0.541603	3.86712	-4.69789	0.000247511	0.00140317	0.0913232	ENSRNOG00000036661	Rab40b	Rab40b, member RAS oncogene family [Source:RGD Symbol;Acc:1305663]
-0.431946	3.5465	-4.69578	0.000248574	0.00140846	0.172557	ENSRNOG00000054963	Rhbdd1	rhomboid domain containing 1 [Source:RGD Symbol;Acc:1306477]
-0.557538	6.48354	-4.69184	0.000250582	0.00141908	-0.267137	ENSRNOG00000003150	Mpc2	mitochondrial pyruvate carrier 2 [Source:RGD Symbol;Acc:1563422]
0.375258	6.68103	4.69009	0.000251477	0.00142293	-0.258561	ENSRNOG00000005018	Scn2a	sodium voltage-gated channel alpha subunit 2 [Source:RGD Symbol;Acc:3632]
-0.533171	9.83983	-4.68999	0.000251527	0.00142293	-0.246171	ENSRNOG00000020650	Slc17a7	solute carrier family 17 member 7 [Source:RGD Symbol;Acc:620101]
0.481405	4.02742	4.68968	0.000251686	0.00142308	0.103609	ENSRNOG00000057556	Pdzrn3	PDZ domain containing RING finger 3 [Source:RGD Symbol;Acc:1305250]
0.361053	3.28878	4.68891	0.00025208	0.00142451	0.312271	ENSRNOG00000015383	Asxl3	ASXL transcriptional regulator 3 [Source:RGD Symbol;Acc:1305869]
-0.272322	5.37918	-4.68842	0.000252336	0.00142451	-0.129125	ENSRNOG00000016472	Marchf4	membrane associated ring-CH-type finger 4 [Source:RGD Symbol;Acc:1590797]
-0.470929	4.45942	-4.68841	0.000252338	0.00142451	-0.030775	ENSRNOG00000024557	Cep112	centrosomal protein 112 [Source:RGD Symbol;Acc:1564168]
0.208165	6.62721	4.68772	0.000252697	0.00142579	-0.261478	ENSRNOG00000001068	Rac1	Rac family small GTPase 1 [Source:RGD Symbol;Acc:619755]
3.02151	1.83622	4.68568	0.000253751	0.00143099	0.487785	ENSRNOG00000018669	Insl3	insulin-like 3 [Source:RGD Symbol;Acc:620117]
-0.489143	4.12943	-4.68535	0.000253917	0.00143117	0.0866798	ENSRNOG00000051529	Opn1mw	opsin 1, medium wave sensitive [Source:RGD Symbol;Acc:620978]
1.17174	2.92291	4.68348	0.00025489	0.0014359	0.490753	ENSRNOG00000016289	Bmpr1b	bone morphogenetic protein receptor type 1B [Source:RGD Symbol;Acc:1595863]
-0.407618	5.15235	-4.68254	0.000255381	0.00143791	-0.158626	ENSRNOG00000017119	Ciao2a	cytosolic iron-sulfur assembly component 2A [Source:RGD Symbol;Acc:1307481]
-0.83473	4.57369	-4.68215	0.000255583	0.00143829	-0.0850108	ENSRNOG00000003634	Zfp354a	zinc finger protein 354A [Source:RGD Symbol;Acc:2967]
0.548126	3.16573	4.68121	0.000256075	0.0014403	0.350281	ENSRNOG00000009450	Hcn4	hyperpolarization activated cyclic nucleotide-gated potassium channel 4 [Source:RGD Symbol;Acc:71065]
-0.311441	8.9972	-4.6805	0.000256447	0.00144164	-0.28763	ENSRNOG00000010975	Adnp	activity-dependent neuroprotector homeobox [Source:RGD Symbol;Acc:71030]
0.40339	8.35096	4.67938	0.000257032	0.00144342	-0.298112	ENSRNOG00000018309	Chd4	chromodomain helicase DNA binding protein 4 [Source:RGD Symbol;Acc:620064]
-0.597814	6.89847	-4.67958	0.000256927	0.00144342	-0.303208	ENSRNOG00000015925	Zfp131	zinc finger protein 131 [Source:RGD Symbol;Acc:1307638]
0.504647	3.6833	4.67882	0.000257324	0.0014437	0.214948	ENSRNOG00000019582	Mthfd1l	methylenetetrahydrofolate dehydrogenase (NADP+ dependent) 1-like [Source:RGD Symbol;Acc:1307311]
-0.324367	6.49728	-4.67877	0.000257352	0.0014437	-0.29181	ENSRNOG00000002342	Aldh3a2	aldehyde dehydrogenase 3 family, member A2 [Source:RGD Symbol;Acc:61866]
-0.319257	5.63403	-4.67842	0.000257533	0.00144396	-0.219338	ENSRNOG00000016384	Pik3cb	phosphatidylinositol-4,5-bisphosphate 3-kinase, catalytic subunit beta [Source:RGD Symbol;Acc:620917]
-0.424004	7.00787	-4.67301	0.000260394	0.00145924	-0.316259	ENSRNOG00000018816	Cox5a	cytochrome c oxidase subunit 5A [Source:RGD Symbol;Acc:620607]
0.575047	3.75904	4.67194	0.000260965	0.00146168	0.107887	ENSRNOG00000020470	Slc25a24	solute carrier family 25 member 24 [Source:RGD Symbol;Acc:1311982]
0.618695	6.66241	4.66882	0.000262631	0.00147024	-0.255186	ENSRNOG00000059683	Mpp2	MAGUK p55 scaffold protein 2 [Source:RGD Symbol;Acc:620014]
1.40115	2.58141	4.66643	0.000263914	0.00147665	0.610836	ENSRNOG00000014783	Pgghg	protein-glucosylgalactosylhydroxylysine glucosidase [Source:RGD Symbol;Acc:1306015]
-0.444046	6.68091	-4.66401	0.000265222	0.0014832	-0.330039	ENSRNOG00000018179	Glt8d1	glycosyltransferase 8 domain containing 1 [Source:RGD Symbol;Acc:1359293]
-0.530821	5.13005	-4.66274	0.000265912	0.00148628	-0.20086	ENSRNOG00000009208	Pibf1	progesterone immunomodulatory binding factor 1 [Source:RGD Symbol;Acc:1305077]
-0.415572	3.56625	-4.66105	0.000266829	0.00149063	0.106191	ENSRNOG00000001736	Bdh1	3-hydroxybutyrate dehydrogenase 1 [Source:RGD Symbol;Acc:620131]
-0.604471	9.95929	-4.66029	0.000267243	0.00149216	-0.302578	ENSRNOG00000056246	Gls	glutaminase [Source:RGD Symbol;Acc:2707]
-0.341623	8.04296	-4.65969	0.000267574	0.00149324	-0.344004	ENSRNOG00000029592	Srsf11	serine and arginine rich splicing factor 11 [Source:RGD Symbol;Acc:1559953]
-3.68088	-0.235536	-4.65514	0.00027007	0.00150638	0.190127	ENSRNOG00000055138	Cldn16	claudin 16 [Source:RGD Symbol;Acc:620322]
-0.356775	4.30777	-4.65288	0.000271324	0.00151259	-0.0584626	ENSRNOG00000029415	Uqcc4	ubiquinol-cytochrome c reductase complex assembly factor 4 [Source:RGD Symbol;Acc:1565784]
0.382019	4.42773	4.649	0.000273483	0.00152383	-0.0267218	ENSRNOG00000025012	Chat	choline O-acetyltransferase [Source:RGD Symbol;Acc:1304627]
-0.258372	5.27863	-4.64369	0.000276465	0.00153885	-0.235216	ENSRNOG00000005344	Nol10	nucleolar protein 10 [Source:RGD Symbol;Acc:1359447]
-0.612884	3.68266	-4.64388	0.000276356	0.00153885	0.0282778	ENSRNOG00000003472	Atp11c	ATPase phospholipid transporting 11C [Source:RGD Symbol;Acc:1564481]
0.599308	4.6118	4.63796	0.000279721	0.00155512	-0.0643545	ENSRNOG00000015991	Npr2	natriuretic peptide receptor 2 [Source:RGD Symbol;Acc:620851]
0.452301	3.31607	4.63753	0.000279969	0.00155512	0.208316	ENSRNOG00000024793	Kctd21	potassium channel tetramerization domain containing 21 [Source:RGD Symbol;Acc:1559529]
-0.379993	7.89702	-4.63768	0.000279885	0.00155512	-0.391014	ENSRNOG00000007814	Kdm3a	lysine demethylase 3A [Source:RGD Symbol;Acc:708351]
-0.78085	5.80374	-4.63778	0.000279827	0.00155512	-0.342826	ENSRNOG00000038085	Rpe	ribulose-5-phosphate-3-epimerase [Source:RGD Symbol;Acc:1564890]
-0.809623	2.10683	-4.6354	0.000281192	0.00156111	0.377563	ENSRNOG00000004524	Desi2	desumoylating isopeptidase 2 [Source:RGD Symbol;Acc:1359392]
-0.73654	3.8907	-4.63513	0.000281345	0.00156115	-0.0388872	ENSRNOG00000021525	Nbeal1	neurobeachin-like 1 [Source:RGD Symbol;Acc:1594799]
0.446052	5.19489	4.6333	0.000282401	0.0015662	-0.185074	ENSRNOG00000017149	Fam131b	family with sequence similarity 131, member B [Source:RGD Symbol;Acc:1560653]
-0.234161	6.92004	-4.63248	0.000282872	0.001568	-0.393664	ENSRNOG00000000511	Srpk1	SRSF protein kinase 1 [Source:RGD Symbol;Acc:1308272]
-0.539466	6.03056	-4.63172	0.000283312	0.00156963	-0.369086	ENSRNOG00000000546	Nt5dc1	5'-nucleotidase domain containing 1 [Source:RGD Symbol;Acc:1305214]
-0.598513	7.45527	-4.6289	0.000284955	0.00157792	-0.397452	ENSRNOG00000009719	C2cd2l	C2CD2-like [Source:RGD Symbol;Acc:1310281]
-0.339987	4.48764	-4.62775	0.000285627	0.00158082	-0.124318	ENSRNOG00000000641	Nrbf2	nuclear receptor binding factor 2 [Source:RGD Symbol;Acc:61937]
-0.788985	4.98233	-4.62701	0.000286058	0.00158239	-0.258277	ENSRNOG00000014630	Iws1	interacts with SUPT6H, CTD assembly factor 1 [Source:RGD Symbol;Acc:1304762]
-0.40773	5.5748	-4.62648	0.000286367	0.00158329	-0.318832	ENSRNOG00000029416	Zfp952	zinc finger protein 952 [Source:RGD Symbol;Acc:2322464]
-0.731543	4.80642	-4.62518	0.000287132	0.0015867	-0.235886	ENSRNOG00000005376	Mad2l1	mitotic arrest deficient 2 like 1 [Source:RGD Symbol;Acc:1310889]
-0.427433	5.74997	-4.62222	0.000288876	0.00159551	-0.358626	ENSRNOG00000022938	Ap4e1	adaptor related protein complex 4 subunit epsilon 1 [Source:RGD Symbol;Acc:1562199]
0.358502	3.40556	4.62009	0.000290136	0.00160164	0.113075	ENSRNOG00000004417	Fam117a	family with sequence similarity 117, member A [Source:RGD Symbol;Acc:1561062]
1.39011	2.47904	4.61938	0.000290555	0.00160313	0.511519	ENSRNOG00000000564	Tbata	thymus, brain and testes associated [Source:RGD Symbol;Acc:1561665]
1.98569	0.882682	4.61807	0.000291338	0.00160459	0.237477	ENSRNOG00000024631	Chadl	chondroadherin-like [Source:RGD Symbol;Acc:6504353]
-0.205127	7.77993	-4.61865	0.000290989	0.00160459	-0.429833	ENSRNOG00000011237	Zc3h13	zinc finger CCCH type containing 13 [Source:RGD Symbol;Acc:1307729]
-0.466675	6.05599	-4.61794	0.000291417	0.00160459	-0.37221	ENSRNOG00000012015	Lrrc49	leucine rich repeat containing 49 [Source:RGD Symbol;Acc:1309466]
-0.501821	4.71943	-4.61827	0.000291219	0.00160459	-0.217871	ENSRNOG00000005180	Vstm2a	V-set and transmembrane domain containing 2A [Source:RGD Symbol;Acc:1596197]
-0.441806	5.47729	-4.61711	0.000291911	0.00160639	-0.329633	ENSRNOG00000017826	Mtrr	5-methyltetrahydrofolate-homocysteine methyltransferase reductase [Source:RGD Symbol;Acc:1308671]
-0.720007	1.98506	-4.61689	0.000292043	0.00160639	0.362047	ENSRNOG00000003950	Lvrn	laeverin [Source:RGD Symbol;Acc:1562779]
-0.364917	6.54883	-4.61617	0.000292475	0.00160794	-0.420737	ENSRNOG00000008927	Hbp1	HMG-box transcription factor 1 [Source:RGD Symbol;Acc:620444]
-0.562142	5.31879	-4.61571	0.000292746	0.00160861	-0.33069	ENSRNOG00000039567	Trmt10c	tRNA methyltransferase 10C, mitochondrial RNase P subunit [Source:RGD Symbol;Acc:1306333]
-0.311927	5.28344	-4.61479	0.0002933	0.00161082	-0.309885	ENSRNOG00000011213	Blm	BLM RecQ like helicase [Source:RGD Symbol;Acc:1308810]
0.403387	4.85809	4.61217	0.000294879	0.00161866	-0.218005	ENSRNOG00000004111	Soat1	sterol O-acyltransferase 1 [Source:RGD Symbol;Acc:621641]
-0.260028	5.8236	-4.61063	0.000295807	0.0016221	-0.375342	ENSRNOG00000055036	RGD1311164	similar to DNA segment, Chr 6, Wayne State University 163, expressed [Source:RGD Symbol;Acc:1311164]
-0.46819	6.71726	-4.61063	0.000295806	0.0016221	-0.440603	ENSRNOG00000001613	Zbtb11	zinc finger and BTB domain containing 11 [Source:RGD Symbol;Acc:1308275]
0.623946	2.27208	4.6087	0.00029698	0.0016277	0.434662	ENSRNOG00000007654	Lrig3	leucine-rich repeats and immunoglobulin-like domains 3 [Source:RGD Symbol;Acc:1561255]
1.29568	3.01503	4.60666	0.00029822	0.00163366	0.322151	ENSRNOG00000028085	Tmem255a	transmembrane protein 255A [Source:RGD Symbol;Acc:727788]
0.254102	6.93824	4.60362	0.000300082	0.00164302	-0.449769	ENSRNOG00000002258	Tmem150c	transmembrane protein 150C [Source:RGD Symbol;Acc:1306105]
0.248497	5.12196	4.60334	0.000300259	0.00164315	-0.280014	ENSRNOG00000002240	Slc49a4	solute carrier family 49 member 4 [Source:RGD Symbol;Acc:1310939]
-0.554189	4.61365	-4.603	0.000300468	0.00164346	-0.158619	ENSRNOG00000058916	Ccdc65	coiled-coil domain containing 65 [Source:RGD Symbol;Acc:1595842]
0.571925	3.1703	4.6019	0.000301142	0.0016463	0.226583	ENSRNOG00000029049	Zdhhc14	zinc finger DHHC-type palmitoyltransferase 14 [Source:RGD Symbol;Acc:1565877]
-0.485156	4.12381	-4.59847	0.000303265	0.00165707	-0.152364	ENSRNOG00000006888	Gcfc2	GC-rich sequence DNA-binding factor 2 [Source:RGD Symbol;Acc:1304792]
0.375954	3.53411	4.59819	0.000303441	0.00165718	0.0273496	ENSRNOG00000013408	Npas2	neuronal PAS domain protein 2 [Source:RGD Symbol;Acc:1309681]
1.17709	2.20833	4.59605	0.000304775	0.00166362	0.493512	ENSRNOG00000019305	Sh3tc2	SH3 domain and tetratricopeptide repeats 2 [Source:RGD Symbol;Acc:1309038]
0.317103	7.17512	4.59406	0.000306021	0.00166957	-0.475466	ENSRNOG00000012629	Rab23	RAB23, member RAS oncogene family [Source:RGD Symbol;Acc:1306867]
1.23357	1.74985	4.59343	0.000306414	0.00167087	0.484403	ENSRNOG00000025625	Rnase4	ribonuclease A family member 4 [Source:RGD Symbol;Acc:61823]
2.57556	1.53436	4.59243	0.000307045	0.00167261	0.168712	ENSRNOG00000031312	Tnfrsf1a	TNF receptor superfamily member 1A [Source:RGD Symbol;Acc:621237]
-0.340035	6.86303	-4.59247	0.000307019	0.00167261	-0.480169	ENSRNOG00000010807	Cox6c	cytochrome c oxidase subunit 6C [Source:RGD Symbol;Acc:620616]
0.533912	7.04474	4.59067	0.000308149	0.00167607	-0.448951	ENSRNOG00000014230	Map1a	microtubule-associated protein 1A [Source:RGD Symbol;Acc:3042]
-0.202306	8.42044	-4.591	0.00030794	0.00167607	-0.482556	ENSRNOG00000023360	Fus	Fus RNA binding protein [Source:RGD Symbol;Acc:1308864]
-0.400207	3.77555	-4.59075	0.000308099	0.00167607	-0.0857466	ENSRNOG00000050552	Snap23	synaptosome associated protein 23 [Source:RGD Symbol;Acc:620221]
-0.576377	7.75717	-4.58959	0.000308835	0.00167895	-0.492033	ENSRNOG00000053859	Ranbp6	RAN binding protein 6 [Source:RGD Symbol;Acc:1305165]
-0.349205	6.49059	-4.58786	0.000309932	0.00168406	-0.474759	ENSRNOG00000013623	Amer2	APC membrane recruitment protein 2 [Source:RGD Symbol;Acc:1559605]
-0.238934	5.25411	-4.58754	0.000310135	0.00168431	-0.342428	ENSRNOG00000017092	Zfp169	zinc finger protein 169 [Source:RGD Symbol;Acc:1304631]
0.542583	3.74606	4.58674	0.000310642	0.00168621	0.0633009	ENSRNOG00000019221	Gstm4	glutathione S-transferase mu 4 [Source:RGD Symbol;Acc:1565825]
0.376106	7.86238	4.58591	0.000311172	0.00168823	-0.492696	ENSRNOG00000000774	Gabbr1	gamma-aminobutyric acid type B receptor subunit 1 [Source:RGD Symbol;Acc:621537]
-0.225949	5.57479	-4.585	0.000311752	0.00169014	-0.399559	ENSRNOG00000056610	Cog5	component of oligomeric golgi complex 5 [Source:RGD Symbol;Acc:1563296]
-0.335017	7.99834	-4.58487	0.000311839	0.00169014	-0.500025	ENSRNOG00000017674	Ctcf	CCCTC-binding factor [Source:RGD Symbol;Acc:621344]
0.301064	6.43758	4.58296	0.000313059	0.00169589	-0.470053	ENSRNOG00000010824	Parp8	poly (ADP-ribose) polymerase family, member 8 [Source:RGD Symbol;Acc:1587384]
-0.342211	5.26773	-4.58261	0.000313282	0.00169625	-0.375815	ENSRNOG00000043105	Lyrm2	LYR motif containing 2 [Source:RGD Symbol;Acc:1597334]
0.403474	4.00748	4.57888	0.000315687	0.0017084	-0.0786125	ENSRNOG00000025023	Stat6	signal transducer and activator of transcription 6 [Source:RGD Symbol;Acc:1309063]
-0.662902	7.04061	-4.57755	0.000316551	0.00171222	-0.518045	ENSRNOG00000009125	Dis3	DIS3 homolog, exosome endoribonuclease and 3'-5' exoribonuclease [Source:RGD Symbol;Acc:1304646]
1.55254	3.69411	4.57724	0.000316753	0.00171245	-0.0283943	ENSRNOG00000022218	Ifi44	interferon-induced protein 44 [Source:RGD Symbol;Acc:1310523]
-0.399107	4.59297	-4.57689	0.00031698	0.00171281	-0.273673	ENSRNOG00000061415	Taf1b	TATA-box binding protein associated factor, RNA polymerase I subunit B [Source:RGD Symbol;Acc:1596058]
0.801319	3.43193	4.57641	0.000317293	0.00171364	0.140799	ENSRNOG00000014251	Capn5	calpain 5 [Source:RGD Symbol;Acc:620084]
-0.973167	5.61766	-4.57585	0.000317659	0.00171475	-0.451125	ENSRNOG00000007237	Id2	inhibitor of DNA binding 2 [Source:RGD Symbol;Acc:2859]
0.550181	3.18458	4.57467	0.000318427	0.00171803	0.0512323	ENSRNOG00000012228	Skap2	src kinase associated phosphoprotein 2 [Source:RGD Symbol;Acc:620159]
-0.385585	6.05019	-4.57385	0.000318964	0.00172007	-0.483272	ENSRNOG00000023807	Ccnyl1	cyclin Y-like 1 [Source:RGD Symbol;Acc:1310683]
0.184386	6.56312	4.57239	0.000319918	0.00172434	-0.486524	ENSRNOG00000045665	Amigo1	adhesion molecule with Ig like domain 1 [Source:RGD Symbol;Acc:1303079]
1.1399	2.70127	4.56993	0.000321534	0.00173112	0.355316	ENSRNOG00000014168	Xylb	xylulokinase [Source:RGD Symbol;Acc:1307372]
-0.260124	5.00608	-4.56974	0.00032166	0.00173112	-0.352391	ENSRNOG00000011543	Fam118b	family with sequence similarity 118, member B [Source:RGD Symbol;Acc:1307173]
-0.592083	7.44166	-4.57017	0.000321375	0.00173112	-0.53401	ENSRNOG00000013121	Mier3	MIER family member 3 [Source:RGD Symbol;Acc:1311241]
0.370915	3.72934	4.56869	0.000322352	0.00173398	-0.076826	ENSRNOG00000020066	Pcdhb11	protocadherin beta 11 [Source:RGD Symbol;Acc:1309608]
0.365365	5.00387	4.56839	0.00032255	0.00173417	-0.336084	ENSRNOG00000013190	Rnaset2	ribonuclease T2 [Source:RGD Symbol;Acc:1309918]
-0.362251	6.25673	-4.56645	0.000323841	0.00174024	-0.491471	ENSRNOG00000003019	Ubn1	ubinuclein 1 [Source:RGD Symbol;Acc:1311582]
-0.979269	8.14445	-4.56602	0.000324122	0.00174088	-0.535491	ENSRNOG00000002874	Rbm25	RNA binding motif protein 25 [Source:RGD Symbol;Acc:1308755]
0.72384	2.16759	4.56534	0.000324578	0.00174246	0.386121	ENSRNOG00000046204	Tspan15	tetraspanin 15 [Source:RGD Symbol;Acc:1588304]
-0.390369	3.71601	-4.56325	0.000325975	0.00174908	-0.118065	ENSRNOG00000022657	NA	NA
[truncated: 8,727 more rows]

## Sheet: female only
logFC	AveExpr	t	P.Value	adj.P.Val	B	ENSEMBL	name	description
-1.29564	8.88889	-20.4074	8.30936e-13	1.84471e-09	19.6856	ENSRNOG00000047799	Gnb5	G protein subunit beta 5 [Source:RGD Symbol;Acc:620759]
-1.33677	7.73771	-21.9986	2.62505e-13	1.84471e-09	20.7961	ENSRNOG00000055779	Tdrd7	tudor domain containing 7 [Source:RGD Symbol;Acc:619724]
-1.68279	9.21963	-20.5323	7.56834e-13	1.84471e-09	19.7712	ENSRNOG00000001205	Agpat3	1-acylglycerol-3-phosphate O-acyltransferase 3 [Source:RGD Symbol;Acc:1305787]
-1.98352	5.65969	-20.796	6.22417e-13	1.84471e-09	19.8308	ENSRNOG00000016353	Nim1k	NIM1 serine/threonine protein kinase [Source:RGD Symbol;Acc:1308116]
-2.01589	5.18584	-20.3617	8.59924e-13	1.84471e-09	19.4605	ENSRNOG00000017260	Cdr2	cerebellar degeneration-related protein 2 [Source:RGD Symbol;Acc:1310578]
4.18659	8.1465	18.8311	2.83443e-12	4.07639e-09	18.4936	ENSRNOG00000011913	Cp	ceruloplasmin [Source:RGD Symbol;Acc:2387]
1.83841	4.49461	18.7445	3.04038e-12	4.07639e-09	18.263	ENSRNOG00000058692	Slc26a4	solute carrier family 26 member 4 [Source:RGD Symbol;Acc:3293]
-1.879	9.17876	-18.894	2.69424e-12	4.07639e-09	18.5427	ENSRNOG00000002142	Cds1	CDP-diacylglycerol synthase 1 [Source:RGD Symbol;Acc:621185]
-1.49275	8.32001	-18.5055	3.69543e-12	4.40413e-09	18.2388	ENSRNOG00000016928	Cplx4	complexin 4 [Source:RGD Symbol;Acc:1307643]
-1.28318	9.65004	-17.9072	6.08448e-12	6.52622e-09	17.7444	ENSRNOG00000003633	Rcvrn	recoverin [Source:RGD Symbol;Acc:620258]
2.34058	9.13928	17.5145	8.51141e-12	8.29939e-09	17.4179	ENSRNOG00000028896	A2m	alpha-2-macroglobulin [Source:RGD Symbol;Acc:2004]
-1.83487	8.34247	-17.3562	9.76351e-12	8.72695e-09	17.2826	ENSRNOG00000021056	Kcnj14	potassium inwardly-rectifying channel, subfamily J, member 14 [Source:RGD Symbol;Acc:628872]
-1.55446	9.39206	-17.0263	1.30439e-11	1.07622e-08	16.995	ENSRNOG00000046949	Kcnb1	potassium voltage-gated channel subfamily B member 1 [Source:RGD Symbol;Acc:2954]
3.51773	5.37744	16.7088	1.73222e-11	1.24606e-08	16.6893	ENSRNOG00000053272	Chi3l1	chitinase 3 like 1 [Source:RGD Symbol;Acc:620874]
-1.31107	8.31217	-16.7022	1.74258e-11	1.24606e-08	16.7094	ENSRNOG00000019996	Slc16a1	solute carrier family 16 member 1 [Source:RGD Symbol;Acc:3690]
-1.14738	7.83848	-16.5185	2.05798e-11	1.37962e-08	16.5441	ENSRNOG00000010361	Kif3b	kinesin family member 3B [Source:RGD Symbol;Acc:1306815]
-0.946954	8.05445	-16.248	2.63737e-11	1.56675e-08	16.2972	ENSRNOG00000018225	Tp53inp2	tumor protein p53 inducible nuclear protein 2 [Source:RGD Symbol;Acc:735085]
-1.32818	7.1666	-16.1929	2.77534e-11	1.56675e-08	16.247	ENSRNOG00000004162	Pfkfb2	6-phosphofructo-2-kinase/fructose-2,6-biphosphatase 2 [Source:RGD Symbol;Acc:3309]
-1.60174	7.52011	-16.2826	2.55434e-11	1.56675e-08	16.3295	ENSRNOG00000011042	Pdzph1	PDZ and pleckstrin homology domains 1 [Source:RGD Symbol;Acc:1560925]
1.58027	4.48176	15.8999	3.64896e-11	1.77903e-08	15.9055	ENSRNOG00000002610	Carhsp1	calcium regulated heat stable protein 1 [Source:RGD Symbol;Acc:708415]
1.19866	9.04426	15.9822	3.37758e-11	1.77903e-08	16.0513	ENSRNOG00000016163	Slc1a3	solute carrier family 1 member 3 [Source:RGD Symbol;Acc:3698]
-1.07596	8.5241	-15.931	3.54369e-11	1.77903e-08	16.0031	ENSRNOG00000060544	Kdm5b	lysine demethylase 5B [Source:RGD Symbol;Acc:1565602]
-2.15564	10.6534	-15.6654	4.5575e-11	2.12538e-08	15.7549	ENSRNOG00000016638	Gnb1	G protein subunit beta 1 [Source:RGD Symbol;Acc:2718]
-1.05141	8.70623	-15.5981	4.86011e-11	2.17206e-08	15.6882	ENSRNOG00000005271	Rapgef5	Rap guanine nucleotide exchange factor 5 [Source:RGD Symbol;Acc:1561668]
-1.1941	7.16649	-15.2427	6.85538e-11	2.94123e-08	15.3443	ENSRNOG00000011815	Sgk1	serum/glucocorticoid regulated kinase 1 [Source:RGD Symbol;Acc:3668]
-1.82161	6.40264	-15.149	7.51496e-11	3.10021e-08	15.2587	ENSRNOG00000049517	Tnfaip3	TNF alpha induced protein 3 [Source:RGD Symbol;Acc:1589275]
-1.45324	6.30717	-15.0562	8.23417e-11	3.2711e-08	15.1675	ENSRNOG00000030069	Faim	Fas apoptotic inhibitory molecule [Source:RGD Symbol;Acc:620572]
2.4083	3.97984	14.9061	9.55776e-11	3.6613e-08	14.8871	ENSRNOG00000002520	Litaf	lipopolysaccharide-induced TNF factor [Source:RGD Symbol;Acc:69294]
2.3273	2.74997	14.73	1.14023e-10	3.82191e-08	14.1874	ENSRNOG00000055251	Prtg	protogenin [Source:RGD Symbol;Acc:1307157]
-1.08756	6.54838	-14.784	1.07997e-10	3.82191e-08	14.8937	ENSRNOG00000015189	Bbs9	Bardet-Biedl syndrome 9 [Source:RGD Symbol;Acc:1308472]
-1.19946	9.04175	-14.7356	1.13377e-10	3.82191e-08	14.8409	ENSRNOG00000017941	Optn	optineurin [Source:RGD Symbol;Acc:628886]
-1.49329	6.69107	-14.794	1.06912e-10	3.82191e-08	14.9046	ENSRNOG00000011071	Nt5e	5' nucleotidase, ecto [Source:RGD Symbol;Acc:61956]
4.07681	3.77446	14.5107	1.42415e-10	4.49277e-08	14.0762	ENSRNOG00000033192	Osmr	oncostatin M receptor [Source:RGD Symbol;Acc:1302983]
1.7541	5.85861	14.5366	1.38703e-10	4.49277e-08	14.6462	ENSRNOG00000016753	Slc14a1	solute carrier family 14 member 1 (Kidd blood group) [Source:RGD Symbol;Acc:3688]
-1.06617	8.40624	-14.4286	1.5489e-10	4.74673e-08	14.5244	ENSRNOG00000049361	Gas7	growth arrest specific 7 [Source:RGD Symbol;Acc:621550]
1.94367	6.9274	14.2517	1.8589e-10	5.38879e-08	14.3394	ENSRNOG00000014787	Cabp5	calcium binding protein 5 [Source:RGD Symbol;Acc:1308108]
-1.51339	6.15861	-14.2731	1.81812e-10	5.38879e-08	14.3795	ENSRNOG00000061348	Fam53b	family with sequence similarity 53, member B [Source:RGD Symbol;Acc:1310799]
2.64538	2.91525	14.0737	2.23769e-10	6.25345e-08	13.7594	ENSRNOG00000057989	Zp2	zona pellucida glycoprotein 2 [Source:RGD Symbol;Acc:620605]
1.75975	3.45166	14.0408	2.31628e-10	6.25345e-08	13.982	ENSRNOG00000014797	Tmbim1	transmembrane BAX inhibitor motif containing 1 [Source:RGD Symbol;Acc:1359409]
-1.04472	7.81216	-14.0343	2.33207e-10	6.25345e-08	14.1108	ENSRNOG00000006689	Chd7	chromodomain helicase DNA binding protein 7 [Source:RGD Symbol;Acc:1311921]
-2.00703	10.427	-13.8925	2.70864e-10	7.08608e-08	13.9743	ENSRNOG00000000065	Pde6b	phosphodiesterase 6B [Source:RGD Symbol;Acc:1311039]
2.0394	7.91987	13.8105	2.95516e-10	7.3714e-08	13.8704	ENSRNOG00000017123	B2m	beta-2 microglobulin [Source:RGD Symbol;Acc:2189]
1.83747	4.81459	13.8216	2.92034e-10	7.3714e-08	13.9128	ENSRNOG00000004448	Acss3	acyl-CoA synthetase short-chain family member 3 [Source:RGD Symbol;Acc:1307051]
1.88801	5.48014	13.7415	3.18078e-10	7.75387e-08	13.8252	ENSRNOG00000010997	Ednrb	endothelin receptor type B [Source:RGD Symbol;Acc:2536]
1.27977	3.49174	13.6831	3.38619e-10	8.07118e-08	13.6853	ENSRNOG00000053869	Ppp1r3d	protein phosphatase 1, regulatory subunit 3D [Source:RGD Symbol;Acc:1586306]
1.98207	4.91487	13.5896	3.74485e-10	8.36817e-08	13.6672	ENSRNOG00000033321	Hmgb2l1	high mobility group box 2-like 1 [Source:RGD Symbol;Acc:1564519]
1.20182	5.38247	13.6107	3.66062e-10	8.36817e-08	13.6822	ENSRNOG00000007177	Poglut3	protein O-glucosyltransferase 3 [Source:RGD Symbol;Acc:1562027]
-1.56258	7.11489	-13.5947	3.72422e-10	8.36817e-08	13.6468	ENSRNOG00000017022	Cerk	ceramide kinase [Source:RGD Symbol;Acc:1305019]
1.31589	5.87061	13.4675	4.27472e-10	9.35727e-08	13.5142	ENSRNOG00000013526	Rassf4	Ras association domain family member 4 [Source:RGD Symbol;Acc:1307785]
-3.54368	4.54511	-13.3929	4.63741e-10	9.94817e-08	13.3024	ENSRNOG00000011648	Aqp1	aquaporin 1 [Source:RGD Symbol;Acc:2141]
-0.817314	8.39132	-13.301	5.12882e-10	1.07866e-07	13.3143	ENSRNOG00000048898	Wasf3	WASP family member 3 [Source:RGD Symbol;Acc:1592807]
1.82149	4.53791	13.2562	5.38811e-10	1.09187e-07	13.3065	ENSRNOG00000029184	Epha6	Eph receptor A6 [Source:RGD Symbol;Acc:1304614]
-2.45476	6.10162	-13.255	5.39523e-10	1.09187e-07	13.3023	ENSRNOG00000005957	Slc4a7	solute carrier family 4 member 7 [Source:RGD Symbol;Acc:621208]
-1.28306	5.8434	-13.1722	5.91283e-10	1.16972e-07	13.2014	ENSRNOG00000030776	Sytl2	synaptotagmin-like 2 [Source:RGD Symbol;Acc:1307647]
-1.64272	7.72347	-13.1593	5.99802e-10	1.16972e-07	13.1583	ENSRNOG00000017405	Raly	RALY heterogeneous nuclear ribonucleoprotein [Source:RGD Symbol;Acc:1307228]
1.05227	5.39961	13.0635	6.67304e-10	1.26533e-07	13.0791	ENSRNOG00000017879	Gab1	GRB2-associated binding protein 1 [Source:RGD Symbol;Acc:1311085]
0.989033	9.43224	13.0566	6.72422e-10	1.26533e-07	13.0457	ENSRNOG00000018651	Agtpbp1	ATP/GTP binding carboxypeptidase 1 [Source:RGD Symbol;Acc:1306307]
-1.8772	6.79361	-12.9164	7.87018e-10	1.45544e-07	12.8999	ENSRNOG00000050949	Ttc39c	tetratricopeptide repeat domain 39C [Source:RGD Symbol;Acc:1585423]
0.849949	6.73065	12.8648	8.3416e-10	1.51647e-07	12.8218	ENSRNOG00000005003	Ptprn2	protein tyrosine phosphatase, receptor type N2 [Source:RGD Symbol;Acc:61904]
0.873453	8.33671	12.7919	9.06105e-10	1.61981e-07	12.7357	ENSRNOG00000013484	Gsta1	glutathione S-transferase alpha 1 [Source:RGD Symbol;Acc:2753]
-0.93166	9.25216	-12.6961	1.01057e-09	1.77694e-07	12.6332	ENSRNOG00000011809	Rpgrip1	RPGR interacting protein 1 [Source:RGD Symbol;Acc:1310807]
3.57162	3.98529	12.6521	1.0628e-09	1.83865e-07	12.5183	ENSRNOG00000011971	C1s	complement C1s [Source:RGD Symbol;Acc:619983]
-1.05239	8.20102	-12.6269	1.09398e-09	1.86255e-07	12.5454	ENSRNOG00000007764	Frmd4b	FERM domain containing 4B [Source:RGD Symbol;Acc:620172]
2.71268	3.86444	12.5754	1.16084e-09	1.94152e-07	12.4567	ENSRNOG00000005229	Sec16b	SEC16 homolog B, endoplasmic reticulum export factor [Source:RGD Symbol;Acc:621658]
-1.98773	5.19749	-12.5637	1.17657e-09	1.94152e-07	12.5336	ENSRNOG00000019005	Pde8a	phosphodiesterase 8A [Source:RGD Symbol;Acc:735125]
2.5836	2.46124	12.4999	1.26655e-09	2.05833e-07	12.0742	ENSRNOG00000012262	Depdc7	DEP domain containing 7 [Source:RGD Symbol;Acc:1309720]
-2.60396	7.47375	-12.4713	1.30923e-09	2.09595e-07	12.3778	ENSRNOG00000061572	Smarcd1	SWI/SNF related, matrix associated, actin dependent regulator of chromatin, subfamily d, member 1 [Source:RGD Symbol;Acc:1305406]
0.999837	4.53011	12.3875	1.44342e-09	2.27678e-07	12.3312	ENSRNOG00000045668	Ifnar2	interferon alpha and beta receptor subunit 2 [Source:RGD Symbol;Acc:1583177]
-2.65435	6.03206	-12.3405	1.52484e-09	2.37035e-07	12.2709	ENSRNOG00000018528	Nrl	neural retina leucine zipper [Source:RGD Symbol;Acc:1305197]
-2.17452	4.44557	-12.309	1.58216e-09	2.42432e-07	12.2237	ENSRNOG00000013728	Polg2	DNA polymerase gamma 2, accessory subunit [Source:RGD Symbol;Acc:1305128]
3.18264	2.58152	12.2408	1.7144e-09	2.54278e-07	11.5856	ENSRNOG00000005883	Nek10	NIMA-related kinase 10 [Source:RGD Symbol;Acc:1564342]
0.783966	5.00457	12.2328	1.73059e-09	2.54278e-07	12.1381	ENSRNOG00000011032	Lhfpl2	LHFPL tetraspan subfamily member 2 [Source:RGD Symbol;Acc:1309869]
-1.78092	6.07338	-12.2446	1.70667e-09	2.54278e-07	12.1364	ENSRNOG00000015499	Serinc4	serine incorporator 4 [Source:RGD Symbol;Acc:1566077]
-2.00146	5.45663	-12.1758	1.85113e-09	2.68314e-07	12.0799	ENSRNOG00000056553	Rdh12	retinol dehydrogenase 12 [Source:RGD Symbol;Acc:1310462]
-0.812843	6.01844	-12.163	1.87945e-09	2.68786e-07	12.0252	ENSRNOG00000015774	Mreg	melanoregulin [Source:RGD Symbol;Acc:1562333]
-1.04534	8.4928	-12.0363	2.18504e-09	3.08378e-07	11.8426	ENSRNOG00000012495	Podxl	podocalyxin-like [Source:RGD Symbol;Acc:621878]
-1.11647	6.96403	-11.9758	2.34922e-09	3.27244e-07	11.7755	ENSRNOG00000007323	Ric8b	RIC8 guanine nucleotide exchange factor B [Source:RGD Symbol;Acc:631419]
1.1258	7.82591	11.9117	2.53741e-09	3.48927e-07	11.6844	ENSRNOG00000012840	Sparc	secreted protein acidic and cysteine rich [Source:RGD Symbol;Acc:3742]
0.871069	4.93327	11.892	2.5985e-09	3.52803e-07	11.7334	ENSRNOG00000019490	Slc20a2	solute carrier family 20 member 2 [Source:RGD Symbol;Acc:3699]
3.64056	3.33455	11.7186	3.20729e-09	4.19529e-07	11.2341	ENSRNOG00000014504	Il1r1	interleukin 1 receptor type 1 [Source:RGD Symbol;Acc:2892]
1.25669	6.64251	11.7266	3.17598e-09	4.19529e-07	11.4602	ENSRNOG00000005159	Fam135b	family with sequence similarity 135, member B [Source:RGD Symbol;Acc:1308133]
-2.03728	5.5362	-11.7238	3.18666e-09	4.19529e-07	11.5219	ENSRNOG00000013167	Hmgb2	high mobility group box 2 [Source:RGD Symbol;Acc:69291]
1.54244	6.81701	11.6742	3.38618e-09	4.37592e-07	11.3921	ENSRNOG00000012580	Ccdc141	coiled-coil domain containing 141 [Source:RGD Symbol;Acc:1593250]
2.18755	3.57166	11.6449	3.50998e-09	4.46674e-07	11.4088	ENSRNOG00000005177	Cryzl2	crystallin zeta like 2 [Source:RGD Symbol;Acc:1304982]
-0.910151	9.10444	-11.638	3.53974e-09	4.46674e-07	11.3574	ENSRNOG00000059715	Cc2d2a	coiled-coil and C2 domain containing 2A [Source:RGD Symbol;Acc:1561042]
3.92309	1.34529	11.5995	3.71142e-09	4.62891e-07	8.24074	ENSRNOG00000024952	Atp8b1	ATPase phospholipid transporting 8B1 [Source:RGD Symbol;Acc:1308488]
-1.44717	6.03167	-11.5858	3.77464e-09	4.65365e-07	11.333	ENSRNOG00000006002	Stk35	serine/threonine kinase 35 [Source:RGD Symbol;Acc:1310247]
2.18587	6.57811	11.5757	3.8218e-09	4.65825e-07	11.2754	ENSRNOG00000030715	Cfh	complement factor H [Source:RGD Symbol;Acc:620428]
3.6057	3.26757	11.4776	4.31474e-09	5.15342e-07	10.935	ENSRNOG00000031743	Gbp2	guanylate binding protein 2 [Source:RGD Symbol;Acc:621810]
1.28996	6.69391	11.4665	4.37492e-09	5.15342e-07	11.1366	ENSRNOG00000019742	Stat3	signal transducer and activator of transcription 3 [Source:RGD Symbol;Acc:3772]
-1.41305	4.33023	-11.4574	4.42453e-09	5.15342e-07	11.2276	ENSRNOG00000025946	Igf2bp2	insulin-like growth factor 2 mRNA binding protein 2 [Source:RGD Symbol;Acc:1305614]
-1.66334	4.6011	-11.4546	4.44024e-09	5.15342e-07	11.2241	ENSRNOG00000015718	RGD1307461	similar to RIKEN cDNA 6430571L13 gene; similar to g20 protein [Source:RGD Symbol;Acc:1307461]
-3.49746	11.5178	-11.4495	4.46828e-09	5.15342e-07	11.1524	ENSRNOG00000017589	Gnat1	G protein subunit alpha transducin 1 [Source:RGD Symbol;Acc:1304683]
-1.33465	10.4141	-11.4134	4.67342e-09	5.33267e-07	11.0945	ENSRNOG00000004778	Cnga1	cyclic nucleotide gated channel subunit alpha 1 [Source:RGD Symbol;Acc:621815]
-1.00298	7.16645	-11.3788	4.87989e-09	5.50966e-07	11.0253	ENSRNOG00000019086	Gucy2f	guanylate cyclase 2F [Source:RGD Symbol;Acc:620439]
-1.06287	5.73226	-11.2342	5.85237e-09	6.53881e-07	10.8949	ENSRNOG00000016949	Slc25a33	solute carrier family 25 member 33 [Source:RGD Symbol;Acc:1583942]
1.5585	4.77426	11.1898	6.18986e-09	6.84458e-07	10.8635	ENSRNOG00000012460	Cntf	ciliary neurotrophic factor [Source:RGD Symbol;Acc:2370]
-1.06189	7.55363	-11.1756	6.3027e-09	6.89824e-07	10.7604	ENSRNOG00000023561	Ano2	anoctamin 2 [Source:RGD Symbol;Acc:1591606]
-1.36179	5.32399	-11.1651	6.38685e-09	6.91973e-07	10.8183	ENSRNOG00000022268	Pnpla3	patatin-like phospholipase domain containing 3 [Source:RGD Symbol;Acc:1595843]
1.0597	7.8285	11.1375	6.61468e-09	7.09491e-07	10.7055	ENSRNOG00000007110	Ankrd6	ankyrin repeat domain 6 [Source:RGD Symbol;Acc:1583731]
1.02991	4.69153	11.086	7.06317e-09	7.50094e-07	10.7351	ENSRNOG00000024651	Greb1	growth regulating estrogen receptor binding 1 [Source:RGD Symbol;Acc:1564091]
-0.762636	6.32164	-11.0347	7.54252e-09	7.93147e-07	10.6036	ENSRNOG00000056658	Xylt1	xylosyltransferase 1 [Source:RGD Symbol;Acc:620093]
0.685671	6.25832	11.0089	7.79548e-09	8.11789e-07	10.556	ENSRNOG00000013072	Plxna4	plexin A4 [Source:RGD Symbol;Acc:1308074]
-1.78037	4.52167	-10.9886	8.00164e-09	8.25246e-07	10.6439	ENSRNOG00000038825	Fabp12	fatty acid binding protein 12 [Source:RGD Symbol;Acc:1565000]
1.6807	5.13184	10.9743	8.15007e-09	8.26938e-07	10.5569	ENSRNOG00000006084	Cngb3	cyclic nucleotide gated channel subunit beta 3 [Source:RGD Symbol;Acc:1565364]
-2.13975	7.20319	-10.9722	8.17224e-09	8.26938e-07	10.5111	ENSRNOG00000030434	Rs1	retinoschisin 1 [Source:RGD Symbol;Acc:1642515]
-1.6019	7.231	-10.9114	8.83842e-09	8.85989e-07	10.4183	ENSRNOG00000019701	C1h11orf98	similar to human chromosome 11 open reading frame 98 [Source:RGD Symbol;Acc:1597339]
0.730305	6.17053	10.835	9.758e-09	9.69114e-07	10.3299	ENSRNOG00000014613	Ddah1	dimethylarginine dimethylaminohydrolase 1 [Source:RGD Symbol;Acc:70968]
2.0056	4.71647	10.8043	1.0156e-08	9.90301e-07	10.3738	ENSRNOG00000016496	Ctsc	cathepsin C [Source:RGD Symbol;Acc:2445]
-0.971735	6.03056	-10.8087	1.0098e-08	9.90301e-07	10.3236	ENSRNOG00000052204	Tbc1d24	TBC1 domain family, member 24 [Source:RGD Symbol;Acc:1306143]
-1.25863	5.17986	-10.5936	1.33897e-08	1.29386e-06	10.0998	ENSRNOG00000022726	Lrit2	leucine-rich repeat, Ig-like and transmembrane domains 2 [Source:RGD Symbol;Acc:1564668]
-0.848748	6.43506	-10.5773	1.36801e-08	1.31011e-06	9.98854	ENSRNOG00000036576	Zdhhc6	zinc finger DHHC-type palmitoyltransferase 6 [Source:RGD Symbol;Acc:1304657]
0.784474	8.24659	10.5605	1.39882e-08	1.32777e-06	9.94035	ENSRNOG00000028362	Unc80	unc-80 homolog, NALCN channel complex subunit [Source:RGD Symbol;Acc:1309976]
1.83898	4.5383	10.529	1.45846e-08	1.34857e-06	10.0195	ENSRNOG00000013948	Zc3hav1	zinc finger CCCH-type containing, antiviral 1 [Source:RGD Symbol;Acc:628694]
-0.744127	5.55772	-10.5307	1.45524e-08	1.34857e-06	9.96686	ENSRNOG00000019346	NA	NA
-3.11068	2.06931	-10.5316	1.45351e-08	1.34857e-06	8.95925	ENSRNOG00000011277	Btg4	BTG anti-proliferation factor 4 [Source:RGD Symbol;Acc:1308809]
1.21438	4.23935	10.4849	1.54672e-08	1.41796e-06	9.98052	ENSRNOG00000020667	Shisa5	shisa family member 5 [Source:RGD Symbol;Acc:1359661]
1.23735	3.68246	10.4609	1.59686e-08	1.45152e-06	9.96174	ENSRNOG00000018865	Adamts12	ADAM metallopeptidase with thrombospondin type 1 motif, 12 [Source:RGD Symbol;Acc:1307323]
1.73849	5.70959	10.4524	1.61514e-08	1.4558e-06	9.8331	ENSRNOG00000011861	Aadat	aminoadipate aminotransferase [Source:RGD Symbol;Acc:2948]
4.9184	2.93315	10.437	1.64887e-08	1.47381e-06	9.17755	ENSRNOG00000006367	Slc5a8	solute carrier family 5 member 8 [Source:RGD Symbol;Acc:1564146]
1.08007	7.47325	10.3912	1.7531e-08	1.55403e-06	9.70549	ENSRNOG00000002524	Gpr37	G protein-coupled receptor 37 [Source:RGD Symbol;Acc:619848]
1.58054	9.03024	10.375	1.79171e-08	1.57523e-06	9.69172	ENSRNOG00000016460	Clu	clusterin [Source:RGD Symbol;Acc:3907]
-2.13794	6.71751	-10.3299	1.90369e-08	1.66008e-06	9.67396	ENSRNOG00000007687	Sema7a	semaphorin 7A (John Milton Hagen blood group) [Source:RGD Symbol;Acc:1305192]
-2.79374	7.23758	-10.2754	2.04894e-08	1.77233e-06	9.60237	ENSRNOG00000006116	Hk2	hexokinase 2 [Source:RGD Symbol;Acc:2797]
1.13135	4.60957	10.2552	2.1059e-08	1.80703e-06	9.64499	ENSRNOG00000010697	Hadh	hydroxyacyl-CoA dehydrogenase [Source:RGD Symbol;Acc:69321]
-0.613754	9.96066	-10.2406	2.14792e-08	1.82846e-06	9.52626	ENSRNOG00000012346	Epb41l2	erythrocyte membrane protein band 4.1-like 2 [Source:RGD Symbol;Acc:1563977]
-0.698901	8.65266	-10.204	2.25747e-08	1.90658e-06	9.45567	ENSRNOG00000001072	Cers4	ceramide synthase 4 [Source:RGD Symbol;Acc:1309303]
0.800149	6.64639	10.1366	2.47463e-08	2.0642e-06	9.35956	ENSRNOG00000009037	Sulf1	sulfatase 1 [Source:RGD Symbol;Acc:708554]
-0.910471	8.46442	-10.1343	2.48258e-08	2.0642e-06	9.35596	ENSRNOG00000017930	Lpcat1	lysophosphatidylcholine acyltransferase 1 [Source:RGD Symbol;Acc:1311599]
1.24898	3.85006	10.1216	2.52601e-08	2.08415e-06	9.50492	ENSRNOG00000026186	Syde2	synapse defective Rho GTPase homolog 2 [Source:RGD Symbol;Acc:1564206]
-0.627611	6.81002	-10.1136	2.55377e-08	2.09097e-06	9.33326	ENSRNOG00000012763	Cwf19l1	CWF19 like cell cycle control factor 1 [Source:RGD Symbol;Acc:1304716]
2.56884	1.78949	9.9939	3.01076e-08	2.44647e-06	8.65369	ENSRNOG00000009385	Pik3cg	phosphatidylinositol-4,5-bisphosphate 3-kinase, catalytic subunit gamma [Source:RGD Symbol;Acc:1306468]
-1.52706	7.88525	-9.97817	3.07694e-08	2.48145e-06	9.13671	ENSRNOG00000019645	Osbp2	oxysterol binding protein 2 [Source:RGD Symbol;Acc:1310505]
2.02683	3.82782	9.94678	3.21364e-08	2.52344e-06	9.26921	ENSRNOG00000013902	P2ry12	purinergic receptor P2Y12 [Source:RGD Symbol;Acc:621681]
1.95588	4.74359	9.94465	3.22312e-08	2.52344e-06	9.20446	ENSRNOG00000029342	Scn7a	sodium voltage-gated channel alpha subunit 7 [Source:RGD Symbol;Acc:61922]
1.84535	4.72326	9.94799	3.20823e-08	2.52344e-06	9.21018	ENSRNOG00000018570	C1qtnf3	C1q and TNF related 3 [Source:RGD Symbol;Acc:1305010]
-0.64199	6.50661	-9.94831	3.20681e-08	2.52344e-06	9.10706	ENSRNOG00000010086	Plagl2	PLAG1 like zinc finger 2 [Source:RGD Symbol;Acc:1307999]
1.56967	5.52303	9.89257	3.46496e-08	2.69313e-06	9.06545	ENSRNOG00000026128	Cpne8	copine 8 [Source:RGD Symbol;Acc:1307939]
-1.24628	4.16452	-9.8822	3.51533e-08	2.71262e-06	9.18198	ENSRNOG00000018052	Cnksr3	Cnksr family member 3 [Source:RGD Symbol;Acc:1307544]
1.47327	6.73635	9.87173	3.567e-08	2.71903e-06	8.98453	ENSRNOG00000001607	Adamts1	ADAM metallopeptidase with thrombospondin type 1 motif, 1 [Source:RGD Symbol;Acc:621241]
-1.96075	7.18196	-9.87026	3.57434e-08	2.71903e-06	9.00504	ENSRNOG00000001194	Rrp1b	ribosomal RNA processing 1B [Source:RGD Symbol;Acc:1305633]
2.75946	3.91633	9.86153	3.61811e-08	2.72359e-06	9.13612	ENSRNOG00000003059	Optc	opticin [Source:RGD Symbol;Acc:1304916]
2.51717	3.18853	9.84019	3.72754e-08	2.72359e-06	9.11554	ENSRNOG00000020716	Axl	Axl receptor tyrosine kinase [Source:RGD Symbol;Acc:620028]
1.40635	2.62131	9.84118	3.72239e-08	2.72359e-06	9.11327	ENSRNOG00000021704	Atp8b5p	ATPase, class I, type 8B, member 5, pseudogene [Source:RGD Symbol;Acc:1587460]
1.3601	3.07899	9.84566	3.69914e-08	2.72359e-06	9.13597	ENSRNOG00000060984	Dnah7	dynein, axonemal, heavy chain 7 [Source:RGD Symbol;Acc:621798]
-0.945726	6.74161	-9.8392	3.73268e-08	2.72359e-06	8.95136	ENSRNOG00000029131	Frmpd2	FERM and PDZ domain containing 2 [Source:RGD Symbol;Acc:1565652]
-1.08859	4.30678	-9.85859	3.63298e-08	2.72359e-06	9.13624	ENSRNOG00000024012	Pex10	peroxisomal biogenesis factor 10 [Source:RGD Symbol;Acc:1591776]
-0.698825	7.64348	-9.80753	3.90178e-08	2.82774e-06	8.88784	ENSRNOG00000043498	Sik2	salt-inducible kinase 2 [Source:RGD Symbol;Acc:1559698]
1.8042	4.284	9.79421	3.97529e-08	2.84178e-06	9.02188	ENSRNOG00000003346	Fancb	FA complementation group B [Source:RGD Symbol;Acc:1561555]
-0.964811	5.58931	-9.79363	3.97853e-08	2.84178e-06	8.95211	ENSRNOG00000001138	Taok3	TAO kinase 3 [Source:RGD Symbol;Acc:1562861]
-0.971439	5.48671	-9.78968	4.00065e-08	2.84178e-06	8.95232	ENSRNOG00000015285	Lrp4	LDL receptor related protein 4 [Source:RGD Symbol;Acc:619731]
-0.511796	8.49803	-9.78429	4.03103e-08	2.84453e-06	8.85821	ENSRNOG00000014846	Anp32a	acidic nuclear phosphoprotein 32 family member A [Source:RGD Symbol;Acc:11508551]
0.919688	6.48236	9.77714	4.07164e-08	2.85441e-06	8.85442	ENSRNOG00000057569	Ahnak	AHNAK nucleoprotein [Source:RGD Symbol;Acc:619779]
0.969462	7.16562	9.76108	4.16454e-08	2.90058e-06	8.81713	ENSRNOG00000000875	Fhl1	four and a half LIM domains 1 [Source:RGD Symbol;Acc:2615]
0.649189	6.11968	9.74232	4.27593e-08	2.93997e-06	8.82071	ENSRNOG00000014276	Plce1	phospholipase C, epsilon 1 [Source:RGD Symbol;Acc:69424]
-0.828837	7.03404	-9.74596	4.25406e-08	2.93997e-06	8.80775	ENSRNOG00000012146	Pomt2	protein-O-mannosyltransferase 2 [Source:RGD Symbol;Acc:1586427]
1.42393	4.39801	9.72137	4.40396e-08	2.98967e-06	8.90328	ENSRNOG00000006068	Tmem117	transmembrane protein 117 [Source:RGD Symbol;Acc:1562562]
1.1313	4.19514	9.72338	4.39151e-08	2.98967e-06	8.92738	ENSRNOG00000047817	Enox1	ecto-NOX disulfide-thiol exchanger 1 [Source:RGD Symbol;Acc:1306118]
-1.93391	7.82453	-9.70635	4.4983e-08	3.03451e-06	8.75015	ENSRNOG00000008209	St3gal1	ST3 beta-galactoside alpha-2,3-sialyltransferase 1 [Source:RGD Symbol;Acc:1309373]
0.578309	5.93458	9.6851	4.63536e-08	3.10743e-06	8.74688	ENSRNOG00000018683	Dock1	dedicator of cyto-kinesis 1 [Source:RGD Symbol;Acc:1566072]
1.67355	2.63488	9.66683	4.75675e-08	3.169e-06	8.86811	ENSRNOG00000019659	Aspa	aspartoacylase [Source:RGD Symbol;Acc:621693]
0.891893	5.0905	9.61738	5.10233e-08	3.37824e-06	8.71444	ENSRNOG00000004466	Fam210b	family with sequence similarity 210, member B [Source:RGD Symbol;Acc:1311378]
0.975672	4.53463	9.6086	5.16639e-08	3.39968e-06	8.74569	ENSRNOG00000003972	Tshr	thyroid stimulating hormone receptor [Source:RGD Symbol;Acc:3911]
-0.799776	8.57974	-9.55855	5.54815e-08	3.62863e-06	8.53265	ENSRNOG00000021793	Tlcd5	TLC domain containing 5 [Source:RGD Symbol;Acc:1565079]
-2.07581	12.4536	-9.54589	5.64933e-08	3.67241e-06	8.58685	ENSRNOG00000011144	Rho	rhodopsin [Source:RGD Symbol;Acc:3573]
1.08986	4.78187	9.51844	5.87554e-08	3.79645e-06	8.5882	ENSRNOG00000003338	Pmp22	peripheral myelin protein 22 [Source:RGD Symbol;Acc:3359]
0.822161	5.04506	9.46708	6.3247e-08	4.0622e-06	8.49368	ENSRNOG00000005573	Ntn4	netrin 4 [Source:RGD Symbol;Acc:1565947]
-1.13616	4.96823	-9.45728	6.41442e-08	4.0953e-06	8.52276	ENSRNOG00000000576	Anapc16	anaphase promoting complex subunit 16 [Source:RGD Symbol;Acc:2321124]
2.24459	2.60083	9.44605	6.51896e-08	4.13742e-06	8.4905	ENSRNOG00000008816	Gpnmb	glycoprotein nmb [Source:RGD Symbol;Acc:71008]
0.624582	6.87788	9.43805	6.5945e-08	4.16074e-06	8.34787	ENSRNOG00000002182	Septin11	septin 11 [Source:RGD Symbol;Acc:1307405]
1.17866	3.61332	9.3996	6.97049e-08	4.37225e-06	8.50622	ENSRNOG00000042189	Rab31	RAB31, member RAS oncogene family [Source:RGD Symbol;Acc:628598]
0.608007	6.18307	9.38296	7.14025e-08	4.45269e-06	8.28648	ENSRNOG00000006645	Ryr3	ryanodine receptor 3 [Source:RGD Symbol;Acc:68952]
2.60903	3.54022	9.35214	7.46607e-08	4.60236e-06	8.45117	ENSRNOG00000017328	Pter	phosphotriesterase related [Source:RGD Symbol;Acc:61313]
1.22615	8.02467	9.3534	7.4525e-08	4.60236e-06	8.22159	ENSRNOG00000032922	Dclk1	doublecortin-like kinase 1 [Source:RGD Symbol;Acc:68437]
2.51013	1.94908	9.33343	7.67148e-08	4.65865e-06	8.08542	ENSRNOG00000017803	Apbb1ip	amyloid beta precursor protein binding family B member 1 interacting protein [Source:RGD Symbol;Acc:1304795]
2.03769	5.68263	9.33198	7.68769e-08	4.65865e-06	8.23695	ENSRNOG00000029841	Cdh19	cadherin 19 [Source:RGD Symbol;Acc:1307169]
1.54088	5.02226	9.33279	7.67864e-08	4.65865e-06	8.28926	ENSRNOG00000015088	Prune2	prune homolog 2 with BCH domain [Source:RGD Symbol;Acc:1311350]
-0.736484	5.57217	-9.32422	7.77487e-08	4.68502e-06	8.26202	ENSRNOG00000016998	Atxn1	ataxin 1 [Source:RGD Symbol;Acc:3624]
1.07141	5.70792	9.31787	7.84689e-08	4.702e-06	8.21241	ENSRNOG00000021938	Lrrtm4	leucine rich repeat transmembrane neuronal 4 [Source:RGD Symbol;Acc:1560707]
0.895867	9.04213	9.30859	7.95348e-08	4.73939e-06	8.16473	ENSRNOG00000011739	Dennd4a	DENN domain containing 4A [Source:RGD Symbol;Acc:1562639]
1.02453	5.14572	9.30044	8.0484e-08	4.76945e-06	8.22981	ENSRNOG00000008193	Cd46	CD46 molecule [Source:RGD Symbol;Acc:3061]
-0.733241	5.9328	-9.23191	8.89483e-08	5.21344e-06	8.10163	ENSRNOG00000011921	Dusp4	dual specificity phosphatase 4 [Source:RGD Symbol;Acc:620625]
-1.13722	11.8341	-9.23564	8.84643e-08	5.21344e-06	8.12131	ENSRNOG00000002517	Pdc	phosducin [Source:RGD Symbol;Acc:3277]
0.900153	6.69776	9.22236	9.02011e-08	5.25814e-06	8.03047	ENSRNOG00000007546	Asns	asparagine synthetase (glutamine-hydrolyzing) [Source:RGD Symbol;Acc:2162]
1.30377	3.16667	9.21179	9.16082e-08	5.3113e-06	8.24952	ENSRNOG00000026036	Pdyn	prodynorphin [Source:RGD Symbol;Acc:62054]
0.925902	5.88792	9.18499	9.52811e-08	5.46516e-06	8.00283	ENSRNOG00000001964	Cd47	Cd47 molecule [Source:RGD Symbol;Acc:2308]
-1.08991	7.39021	-9.1858	9.51676e-08	5.46516e-06	7.97702	ENSRNOG00000050500	Tob2	transducer of ERBB2, 2 [Source:RGD Symbol;Acc:1359722]
1.42541	6.00942	9.16642	9.79166e-08	5.5569e-06	7.96832	ENSRNOG00000027540	Eeig2	EEIG family member 2 [Source:RGD Symbol;Acc:1310037]
0.808385	4.86238	9.16896	9.75525e-08	5.5569e-06	8.06136	ENSRNOG00000053200	Dock10	dedicator of cytokinesis 10 [Source:RGD Symbol;Acc:1561963]
1.97357	4.90372	9.15043	1.00248e-07	5.64658e-06	8.02884	ENSRNOG00000013280	Olfm4	olfactomedin 4 [Source:RGD Symbol;Acc:1311708]
-1.06545	10.5038	-9.14839	1.0055e-07	5.64658e-06	7.95494	ENSRNOG00000013330	Cdhr1	cadherin-related family member 1 [Source:RGD Symbol;Acc:620420]
-0.864398	6.32723	-9.14253	1.01421e-07	5.66584e-06	7.93795	ENSRNOG00000047427	Cdan1	codanin 1 [Source:RGD Symbol;Acc:1306771]
-1.14257	5.55432	-9.11436	1.05724e-07	5.87563e-06	7.95833	ENSRNOG00000012597	Rmc1	regulator of MON1-CCZ1 [Source:RGD Symbol;Acc:1311805]
1.35832	3.53904	9.06984	1.12918e-07	6.2431e-06	8.03047	ENSRNOG00000012508	Slc39a8	solute carrier family 39 member 8 [Source:RGD Symbol;Acc:1308236]
0.613242	9.98089	9.03227	1.19391e-07	6.50953e-06	7.76266	ENSRNOG00000046829	Kdr	kinase insert domain receptor [Source:RGD Symbol;Acc:2965]
-0.895587	5.44584	-9.03133	1.19558e-07	6.50953e-06	7.83759	ENSRNOG00000059461	B4galt1	beta-1,4-galactosyltransferase 1 [Source:RGD Symbol;Acc:620900]
-0.939347	5.17013	-9.03292	1.19276e-07	6.50953e-06	7.86613	ENSRNOG00000012140	Cep89	centrosomal protein 89 [Source:RGD Symbol;Acc:1311730]
0.581951	8.20265	9.02322	1.21007e-07	6.55518e-06	7.7234	ENSRNOG00000015124	Gpam	glycerol-3-phosphate acyltransferase, mitochondrial [Source:RGD Symbol;Acc:61847]
1.75475	2.75412	9.00979	1.23449e-07	6.65385e-06	7.95177	ENSRNOG00000013309	Pik3ap1	phosphoinositide-3-kinase adaptor protein 1 [Source:RGD Symbol;Acc:1307744]
1.33474	2.43039	8.99855	1.25533e-07	6.73233e-06	7.91061	ENSRNOG00000060348	Zdhhc23	zinc finger DHHC-type palmitoyltransferase 23 [Source:RGD Symbol;Acc:1303254]
0.925812	5.96506	8.98064	1.2893e-07	6.87968e-06	7.69119	ENSRNOG00000008116	Plpp3	phospholipid phosphatase 3 [Source:RGD Symbol;Acc:620454]
0.713265	4.99449	8.97735	1.29563e-07	6.87968e-06	7.76457	ENSRNOG00000002180	Tbc1d1	TBC1 domain family member 1 [Source:RGD Symbol;Acc:1304562]
1.515	4.36043	8.97293	1.30421e-07	6.89113e-06	7.80951	ENSRNOG00000002305	Slc15a2	solute carrier family 15 member 2 [Source:RGD Symbol;Acc:61972]
-0.548348	6.94224	-8.96444	1.32084e-07	6.94477e-06	7.64063	ENSRNOG00000007324	Plxna2	plexin A2 [Source:RGD Symbol;Acc:1305325]
0.66299	5.29526	8.94975	1.35016e-07	7.06428e-06	7.69659	ENSRNOG00000010680	Med12l	mediator complex subunit 12L [Source:RGD Symbol;Acc:1592212]
0.598887	5.27379	8.9258	1.39943e-07	7.25134e-06	7.66394	ENSRNOG00000002347	Rgl1	ral guanine nucleotide dissociation stimulator,-like 1 [Source:RGD Symbol;Acc:1308947]
-4.61926	2.47296	-8.92606	1.39888e-07	7.25134e-06	6.40527	ENSRNOG00000006860	Itk	IL2-inducible T-cell kinase [Source:RGD Symbol;Acc:1311618]
-1.38682	8.83731	-8.91542	1.42138e-07	7.32967e-06	7.57211	ENSRNOG00000059237	Clul1	clusterin like 1 [Source:RGD Symbol;Acc:1306852]
1.04382	3.88991	8.90748	1.4384e-07	7.38193e-06	7.7679	ENSRNOG00000043304	Apcdd1	APC down-regulated 1 [Source:RGD Symbol;Acc:1589962]
0.822748	7.11037	8.88674	1.48388e-07	7.54317e-06	7.51027	ENSRNOG00000057221	Scn3b	sodium voltage-gated channel beta subunit 3 [Source:RGD Symbol;Acc:621657]
-2.01499	8.3182	-8.88778	1.48156e-07	7.54317e-06	7.52502	ENSRNOG00000051911	Rbp3	retinol binding protein 3 [Source:RGD Symbol;Acc:3545]
1.90237	2.99882	8.85545	1.55541e-07	7.86947e-06	7.73346	ENSRNOG00000017191	Trim5	tripartite motif-containing 5 [Source:RGD Symbol;Acc:1304579]
-0.647846	8.06417	-8.84451	1.58124e-07	7.96264e-06	7.44906	ENSRNOG00000019534	Ap2a2	adaptor related protein complex 2 subunit alpha 2 [Source:RGD Symbol;Acc:71015]
1.11425	5.12575	8.80307	1.68334e-07	8.43715e-06	7.48619	ENSRNOG00000014064	Ctsh	cathepsin H [Source:RGD Symbol;Acc:2447]
-2.63783	4.55198	-8.79946	1.69255e-07	8.44387e-06	7.63235	ENSRNOG00000013954	Alpl	alkaline phosphatase, biomineralization associated [Source:RGD Symbol;Acc:2100]
-1.16175	4.99667	-8.76787	1.77552e-07	8.81676e-06	7.48952	ENSRNOG00000020202	Asrgl1	asparaginase and isoaspartyl peptidase 1 [Source:RGD Symbol;Acc:708526]
1.74426	3.3795	8.7526	1.81714e-07	8.9723e-06	7.58044	ENSRNOG00000011796	C1r	complement C1r [Source:RGD Symbol;Acc:1309091]
-2.67417	6.88533	-8.75027	1.82357e-07	8.9723e-06	7.37281	ENSRNOG00000018430	Grk1	G protein-coupled receptor kinase 1 [Source:RGD Symbol;Acc:619712]
-0.717952	5.99243	-8.72466	1.89593e-07	9.28575e-06	7.31066	ENSRNOG00000045654	Hspa1a	heat shock protein family A (Hsp70) member 1A [Source:RGD Symbol;Acc:2840]
1.50713	3.80632	8.71424	1.92626e-07	9.39141e-06	7.47727	ENSRNOG00000008196	Parp12	poly (ADP-ribose) polymerase family, member 12 [Source:RGD Symbol;Acc:1308628]
-1.79077	7.22861	-8.70072	1.96636e-07	9.5435e-06	7.24684	ENSRNOG00000022044	Cabp4	calcium binding protein 4 [Source:RGD Symbol;Acc:1306083]
-0.872267	4.77768	-8.69618	1.98002e-07	9.56651e-06	7.38718	ENSRNOG00000036719	Samd10	sterile alpha motif domain containing 10 [Source:RGD Symbol;Acc:1563203]
-2.60094	3.66769	-8.68746	2.00651e-07	9.65106e-06	7.46679	ENSRNOG00000028311	Cnpy1	canopy FGF signaling regulator 1 [Source:RGD Symbol;Acc:1583296]
0.822092	7.58454	8.6807	2.02731e-07	9.70755e-06	7.18858	ENSRNOG00000008479	Slc8a1	solute carrier family 8 member A1 [Source:RGD Symbol;Acc:3717]
-1.03134	8.74483	-8.66911	2.06352e-07	9.83705e-06	7.18247	ENSRNOG00000007889	Aipl1	aryl hydrocarbon receptor-interacting protein-like 1 [Source:RGD Symbol;Acc:70906]
3.35844	5.48259	8.64955	2.12618e-07	1.00909e-05	7.32453	ENSRNOG00000002919	Gfap	glial fibrillary acidic protein [Source:RGD Symbol;Acc:2679]
1.27202	5.50014	8.64453	2.14259e-07	1.0124e-05	7.20267	ENSRNOG00000024620	Mamdc2	MAM domain containing 2 [Source:RGD Symbol;Acc:1305129]
-1.28686	7.55623	-8.63759	2.16548e-07	1.01873e-05	7.13128	ENSRNOG00000016635	Katnip	katanin interacting protein [Source:RGD Symbol;Acc:1595846]
-1.01972	6.47966	-8.63326	2.17988e-07	1.02102e-05	7.15678	ENSRNOG00000002129	Lrrc8b	leucine rich repeat containing 8 VRAC subunit B [Source:RGD Symbol;Acc:1563429]
1.45292	4.36976	8.62794	2.19774e-07	1.02491e-05	7.28435	ENSRNOG00000030104	Vom2r44	vomeronasal 2 receptor 44 [Source:RGD Symbol;Acc:708515]
2.27152	5.42451	8.62083	2.22184e-07	1.03051e-05	7.18503	ENSRNOG00000059538	Clec2g	C-type lectin domain family 2, member G [Source:RGD Symbol;Acc:1563148]
1.47672	5.23898	8.61874	2.22897e-07	1.03051e-05	7.17357	ENSRNOG00000005956	Erich5	glutamate-rich 5 [Source:RGD Symbol;Acc:1590540]
-0.591774	6.57564	-8.61345	2.24712e-07	1.03445e-05	7.10424	ENSRNOG00000006067	Aifm1	apoptosis inducing factor, mitochondria associated 1 [Source:RGD Symbol;Acc:620817]
1.12144	3.05215	8.6033	2.28242e-07	1.04621e-05	7.35714	ENSRNOG00000004226	Irak3	interleukin-1 receptor-associated kinase 3 [Source:RGD Symbol;Acc:1308846]
-0.565371	5.56507	-8.58482	2.34819e-07	1.07177e-05	7.12408	ENSRNOG00000025629	Prpf3	pre-mRNA processing factor 3 [Source:RGD Symbol;Acc:1310555]
1.07262	3.1154	8.56165	2.43344e-07	1.10131e-05	7.28729	ENSRNOG00000008356	Myo5c	myosin VC [Source:RGD Symbol;Acc:1309994]
-1.06338	6.24728	-8.56305	2.42822e-07	1.10131e-05	7.04964	ENSRNOG00000007443	Jag1	jagged canonical Notch ligand 1 [Source:RGD Symbol;Acc:2937]
0.722725	4.20906	8.53155	2.54913e-07	1.14882e-05	7.16017	ENSRNOG00000022636	Alpk1	alpha-kinase 1 [Source:RGD Symbol;Acc:1304613]
0.807491	4.80791	8.51564	2.61256e-07	1.17248e-05	7.08709	ENSRNOG00000019018	Plat	plasminogen activator, tissue type [Source:RGD Symbol;Acc:3342]
1.87413	1.9178	8.48508	2.73916e-07	1.2191e-05	6.96097	ENSRNOG00000016750	Cyp26a1	cytochrome P450, family 26, subfamily a, polypeptide 1 [Source:RGD Symbol;Acc:620161]
-2.8228	8.01491	-8.48769	2.72809e-07	1.2191e-05	6.91307	ENSRNOG00000019858	Rom1	retinal outer segment membrane protein 1 [Source:RGD Symbol;Acc:1306070]
2.04689	3.86768	8.45702	2.86104e-07	1.26808e-05	7.08134	ENSRNOG00000061379	C7	complement C7 [Source:RGD Symbol;Acc:620318]
2.37637	2.38072	8.45066	2.88945e-07	1.27017e-05	7.10319	ENSRNOG00000022884	Cd84	CD84 molecule [Source:RGD Symbol;Acc:1564553]
1.57497	2.73746	8.45223	2.88243e-07	1.27017e-05	7.12783	ENSRNOG00000060237	Inhbb	inhibin subunit beta B [Source:RGD Symbol;Acc:2913]
1.35629	6.72674	8.44169	2.93004e-07	1.27978e-05	6.81153	ENSRNOG00000019077	Lipa	lipase A, lysosomal acid type [Source:RGD Symbol;Acc:3008]
-1.3478	7.50261	-8.44057	2.93517e-07	1.27978e-05	6.82188	ENSRNOG00000031773	Cngb1	cyclic nucleotide gated channel subunit beta 1 [Source:RGD Symbol;Acc:621809]
0.48831	7.64881	8.4272	2.99687e-07	1.30139e-05	6.78616	ENSRNOG00000058003	Spon1	spondin 1 [Source:RGD Symbol;Acc:619918]
1.77112	6.94785	8.41861	3.03726e-07	1.30885e-05	6.77751	ENSRNOG00000014079	Stat4	signal transducer and activator of transcription 4 [Source:RGD Symbol;Acc:1305747]
0.789905	6.90582	8.41836	3.03844e-07	1.30885e-05	6.77473	ENSRNOG00000009539	Khdrbs3	KH RNA binding domain containing, signal transduction associated 3 [Source:RGD Symbol;Acc:620921]
0.998139	3.89447	8.39522	3.1501e-07	1.35152e-05	6.97539	ENSRNOG00000038480	Ppp1r36	protein phosphatase 1, regulatory subunit 36 [Source:RGD Symbol;Acc:1309051]
-0.760303	4.27572	-8.37965	3.22763e-07	1.37927e-05	6.93964	ENSRNOG00000000937	Slc46a3	solute carrier family 46, member 3 [Source:RGD Symbol;Acc:1307594]
-2.10894	6.8497	-8.36974	3.27804e-07	1.39525e-05	6.75253	ENSRNOG00000017883	Camsap1	calmodulin regulated spectrin-associated protein 1 [Source:RGD Symbol;Acc:1565022]
0.967736	4.95963	8.36427	3.30621e-07	1.40167e-05	6.80008	ENSRNOG00000013552	Scd	stearoyl-CoA desaturase [Source:RGD Symbol;Acc:621176]
2.13429	5.79307	8.35707	3.34366e-07	1.41197e-05	6.72005	ENSRNOG00000005048	Trhr	thyrotropin releasing hormone receptor [Source:RGD Symbol;Acc:3904]
-2.02904	8.43675	-8.31793	3.55535e-07	1.49548e-05	6.62424	ENSRNOG00000015623	Guca1b	guanylate cyclase activator 1B [Source:RGD Symbol;Acc:1308191]
1.02141	5.95412	8.29846	3.66582e-07	1.52544e-05	6.60805	ENSRNOG00000031398	Mab21l2	mab-21 like 2 [Source:RGD Symbol;Acc:1595520]
0.86771	7.1606	8.29786	3.66924e-07	1.52544e-05	6.57874	ENSRNOG00000018087	Vim	vimentin [Source:RGD Symbol;Acc:621646]
-1.33512	9.83983	-8.29923	3.66134e-07	1.52544e-05	6.61032	ENSRNOG00000020650	Slc17a7	solute carrier family 17 member 7 [Source:RGD Symbol;Acc:620101]
-0.586411	8.47412	-8.28238	3.75977e-07	1.55704e-05	6.56114	ENSRNOG00000007393	Ndrg1	N-myc downstream regulated 1 [Source:RGD Symbol;Acc:1307303]
0.992149	6.17141	8.2627	3.87819e-07	1.59377e-05	6.54117	ENSRNOG00000007713	Tmcc3	transmembrane and coiled-coil domain family 3 [Source:RGD Symbol;Acc:1307241]
0.63292	7.97279	8.26371	3.87204e-07	1.59377e-05	6.52372	ENSRNOG00000011918	Vsx2	visual system homeobox 2 [Source:RGD Symbol;Acc:621215]
-0.632085	6.76776	-8.25443	3.92914e-07	1.60855e-05	6.52731	ENSRNOG00000016011	Plekhg1	pleckstrin homology and RhoGEF domain containing G1 [Source:RGD Symbol;Acc:1583676]
1.36555	4.01224	8.25129	3.94868e-07	1.6104e-05	6.71681	ENSRNOG00000054695	Calcrl	calcitonin receptor like receptor [Source:RGD Symbol;Acc:2255]
1.35767	7.32504	8.22701	4.10309e-07	1.66704e-05	6.46238	ENSRNOG00000013674	Megf10	multiple EGF-like domains 10 [Source:RGD Symbol;Acc:735084]
0.489375	7.18203	8.1981	4.2953e-07	1.73854e-05	6.41722	ENSRNOG00000019549	Akap12	A-kinase anchoring protein 12 [Source:RGD Symbol;Acc:70988]
0.522575	6.80016	8.18606	4.37815e-07	1.76541e-05	6.40143	ENSRNOG00000010889	Fbxw7	F-box and WD repeat domain containing 7 [Source:RGD Symbol;Acc:2321145]
-1.25255	5.27095	-8.178	4.43451e-07	1.78144e-05	6.50355	ENSRNOG00000059055	Hsbp1l1	heat shock factor binding protein 1-like 1 [Source:RGD Symbol;Acc:2301798]
0.939337	3.94312	8.17027	4.4893e-07	1.79673e-05	6.62347	ENSRNOG00000005478	Fkbp9	FKBP prolyl isomerase 9 [Source:RGD Symbol;Acc:1549757]
1.24758	4.93571	8.1376	4.72877e-07	1.86264e-05	6.44	ENSRNOG00000002461	Nid1	nidogen 1 [Source:RGD Symbol;Acc:3178]
0.729743	4.85997	8.13806	4.72535e-07	1.86264e-05	6.4661	ENSRNOG00000060614	Pxdn	peroxidasin [Source:RGD Symbol;Acc:1560694]
-0.870034	8.34689	-8.14008	4.71011e-07	1.86264e-05	6.32827	ENSRNOG00000034013	Acaca	acetyl-CoA carboxylase alpha [Source:RGD Symbol;Acc:621248]
-1.66663	2.93772	-8.136	4.74082e-07	1.86264e-05	6.63275	ENSRNOG00000006575	Ccdc96	coiled-coil domain containing 96 [Source:RGD Symbol;Acc:1305153]
-1.82192	3.72422	-8.13668	4.73573e-07	1.86264e-05	6.63674	ENSRNOG00000020344	Sntb2	syntrophin, beta 2 [Source:RGD Symbol;Acc:1592340]
1.12853	3.44608	8.13064	4.78149e-07	1.87176e-05	6.58352	ENSRNOG00000016119	Fzd7	frizzled class receptor 7 [Source:RGD Symbol;Acc:2321905]
0.713282	5.29655	8.12623	4.81521e-07	1.87811e-05	6.39035	ENSRNOG00000005879	Maml2	mastermind-like transcriptional coactivator 2 [Source:RGD Symbol;Acc:1587536]
1.51726	6.68763	8.12045	4.85982e-07	1.88864e-05	6.31046	ENSRNOG00000048088	Mest	mesoderm specific transcript [Source:RGD Symbol;Acc:1594589]
-1.95784	4.52485	-8.11746	4.88308e-07	1.89083e-05	6.55115	ENSRNOG00000038119	AABR07034706.1	RIKEN cDNA A930003A15 gene [Source:MGI Symbol;Acc:MGI:1915412]
0.641802	4.29898	8.11104	4.93338e-07	1.90343e-05	6.48	ENSRNOG00000028198	Sh2b3	SH2B adaptor protein 3 [Source:RGD Symbol;Acc:68411]
-2.1473	5.95286	-8.10155	5.00865e-07	1.92555e-05	6.39185	ENSRNOG00000047225	Tma7	translation machinery associated 7 homolog [Source:RGD Symbol;Acc:1584795]
-1.44468	9.7347	-8.07671	5.21163e-07	1.99643e-05	6.24625	ENSRNOG00000012892	Abca4	ATP binding cassette subfamily A member 4 [Source:RGD Symbol;Acc:1309445]
-0.743869	5.01705	-8.06985	5.26913e-07	2.0078e-05	6.34586	ENSRNOG00000036842	Smug1	single-strand-selective monofunctional uracil-DNA glycosylase 1 [Source:RGD Symbol;Acc:631403]
-1.00933	7.13336	-8.06871	5.27876e-07	2.0078e-05	6.21992	ENSRNOG00000007478	Cry2	cryptochrome circadian regulator 2 [Source:RGD Symbol;Acc:620935]
1.53364	3.78717	8.05716	5.37739e-07	2.03809e-05	6.42342	ENSRNOG00000017874	Cd53	Cd53 molecule [Source:RGD Symbol;Acc:2310]
1.85441	1.67623	8.03244	5.59493e-07	2.11307e-05	6.29688	ENSRNOG00000005620	Lcp2	lymphocyte cytosolic protein 2 [Source:RGD Symbol;Acc:619743]
-0.566957	10.1504	-8.01975	5.71024e-07	2.14905e-05	6.16173	ENSRNOG00000016047	Macf1	microtubule-actin crosslinking factor 1 [Source:RGD Symbol;Acc:1306057]
-0.634088	5.65022	-7.9992	5.90218e-07	2.21353e-05	6.17411	ENSRNOG00000001781	Lmln	leishmanolysin like peptidase [Source:RGD Symbol;Acc:1311465]
1.11643	3.68286	7.99249	5.96627e-07	2.21726e-05	6.3692	ENSRNOG00000000142	Plxdc2	plexin domain containing 2 [Source:RGD Symbol;Acc:1305962]
1.00276	3.86373	7.99167	5.97417e-07	2.21726e-05	6.33595	ENSRNOG00000003613	Mid1	midline 1 [Source:RGD Symbol;Acc:2640]
-0.760611	6.45346	-7.99458	5.94625e-07	2.21726e-05	6.11428	ENSRNOG00000013583	Tbc1d8	TBC1 domain family, member 8 [Source:RGD Symbol;Acc:1595491]
-0.870222	4.21224	-7.98376	6.0509e-07	2.238e-05	6.32257	ENSRNOG00000061995	NA	NA
2.48757	1.84891	7.97857	6.10172e-07	2.24134e-05	6.21229	ENSRNOG00000010266	Cd180	CD180 molecule [Source:RGD Symbol;Acc:1308170]
1.08461	5.08144	7.98016	6.0861e-07	2.24134e-05	6.16222	ENSRNOG00000030930	Samsn1	SAM domain, SH3 domain and nuclear localization signals, 1 [Source:RGD Symbol;Acc:620926]
0.893557	3.65459	7.97432	6.14367e-07	2.24905e-05	6.33088	ENSRNOG00000015118	Cpped1	calcineurin-like phosphoesterase domain containing 1 [Source:RGD Symbol;Acc:1306568]
-1.19877	11.1536	-7.95609	6.32716e-07	2.30834e-05	6.07988	ENSRNOG00000017816	Pde6a	phosphodiesterase 6A [Source:RGD Symbol;Acc:1306835]
1.19672	5.22097	7.94977	6.3922e-07	2.30851e-05	6.0966	ENSRNOG00000053303	Bend4	BEN domain containing 4 [Source:RGD Symbol;Acc:1584735]
-1.14567	4.43261	-7.95178	6.37139e-07	2.30851e-05	6.24367	ENSRNOG00000000245	Slc16a6	solute carrier family 16, member 6 [Source:RGD Symbol;Acc:735117]
-1.4929	2.9492	-7.95172	6.37207e-07	2.30851e-05	6.34827	ENSRNOG00000019022	Fam89a	family with sequence similarity 89, member A [Source:RGD Symbol;Acc:1309879]
-0.649557	8.78619	-7.94058	6.48783e-07	2.33518e-05	6.00436	ENSRNOG00000013479	Stard7	StAR-related lipid transfer domain containing 7 [Source:RGD Symbol;Acc:1307613]
2.16673	4.13799	7.93457	6.55126e-07	2.35013e-05	6.21732	ENSRNOG00000018517	Trim21	tripartite motif-containing 21 [Source:RGD Symbol;Acc:1305795]
-0.664243	8.49243	-7.91559	6.75582e-07	2.41543e-05	5.95792	ENSRNOG00000014562	Hnrnpf	heterogeneous nuclear ribonucleoprotein F [Source:RGD Symbol;Acc:620366]
0.872533	6.91457	7.90646	6.85653e-07	2.43837e-05	5.93504	ENSRNOG00000021984	Rgs7	regulator of G-protein signaling 7 [Source:RGD Symbol;Acc:3570]
-1.78916	7.40332	-7.90566	6.86545e-07	2.43837e-05	5.95762	ENSRNOG00000004143	Adipor1	adiponectin receptor 1 [Source:RGD Symbol;Acc:1303151]
1.81063	2.30715	7.89728	6.95947e-07	2.4555e-05	6.23955	ENSRNOG00000011054	Laptm5	lysosomal protein transmembrane 5 [Source:RGD Symbol;Acc:621838]
0.516554	8.19334	7.89923	6.93745e-07	2.4555e-05	5.92483	ENSRNOG00000033280	Pam	peptidylglycine alpha-amidating monooxygenase [Source:RGD Symbol;Acc:3252]
0.752206	4.40841	7.88292	7.12367e-07	2.49701e-05	6.09723	ENSRNOG00000033261	Fam107a	family with sequence similarity 107, member A [Source:RGD Symbol;Acc:1306327]
0.549884	5.42908	7.8839	7.11237e-07	2.49701e-05	5.98948	ENSRNOG00000009542	Kcnh5	potassium voltage-gated channel subfamily H member 5 [Source:RGD Symbol;Acc:621417]
-1.78347	3.06466	-7.87928	7.16599e-07	2.50366e-05	6.23977	ENSRNOG00000014909	Sh2d5	SH2 domain containing 5 [Source:RGD Symbol;Acc:1305952]
0.710981	5.79221	7.87423	7.22504e-07	2.5161e-05	5.93829	ENSRNOG00000011775	Mfap3l	microfibril associated protein 3 like [Source:RGD Symbol;Acc:1311274]
-1.12431	5.28748	-7.87009	7.27386e-07	2.5249e-05	6.01819	ENSRNOG00000028448	Elovl1	ELOVL fatty acid elongase 1 [Source:RGD Symbol;Acc:1587151]
2.24743	4.12915	7.85595	7.44314e-07	2.57532e-05	6.08938	ENSRNOG00000049115	Ccr5	C-C motif chemokine receptor 5 [Source:RGD Symbol;Acc:620596]
0.920444	6.32648	7.8539	7.46803e-07	2.57563e-05	5.85978	ENSRNOG00000004731	Ano3	anoctamin 3 [Source:RGD Symbol;Acc:1308873]
2.20617	4.0541	7.84784	7.54212e-07	2.59285e-05	6.09616	ENSRNOG00000057159	Rsl1	regulator of sex limited protein 1 [Source:RGD Symbol;Acc:1587849]
1.39712	5.75635	7.83257	7.7323e-07	2.64973e-05	5.89122	ENSRNOG00000010478	Serpina3n	serine (or cysteine) peptidase inhibitor, clade A, member 3N [Source:RGD Symbol;Acc:3747]
-3.58123	2.10266	-7.82394	7.84202e-07	2.67877e-05	5.17251	ENSRNOG00000002659	Ciita	class II, major histocompatibility complex, transactivator [Source:RGD Symbol;Acc:619813]
1.94914	2.81739	7.81486	7.95916e-07	2.71016e-05	6.13821	ENSRNOG00000021726	Tlr3	toll-like receptor 3 [Source:RGD Symbol;Acc:735171]
0.716781	8.43171	7.80951	8.02906e-07	2.71671e-05	5.77695	ENSRNOG00000011989	Vat1l	vesicle amine transport 1-like [Source:RGD Symbol;Acc:1598315]
0.600204	7.58655	7.81123	8.00657e-07	2.71671e-05	5.77383	ENSRNOG00000008298	Dock7	dedicator of cytokinesis 7 [Source:RGD Symbol;Acc:1309790]
-0.67673	4.85677	-7.8025	8.12161e-07	2.73938e-05	5.93303	ENSRNOG00000028652	Map10	microtubule-associated protein 10 [Source:RGD Symbol;Acc:1308644]
0.930238	4.42231	7.78257	8.39094e-07	2.81254e-05	5.91717	ENSRNOG00000051100	NA	NA
-0.685342	8.88986	-7.7844	8.36571e-07	2.81254e-05	5.74455	ENSRNOG00000046741	Itsn2	intersectin 2 [Source:RGD Symbol;Acc:1590890]
-1.58754	4.07863	-7.77891	8.4414e-07	2.82064e-05	6.02524	ENSRNOG00000001079	Daglb	diacylglycerol lipase, beta [Source:RGD Symbol;Acc:1310193]
-0.780425	4.46824	-7.76787	8.59551e-07	2.85214e-05	5.92893	ENSRNOG00000007333	Wdr20	WD repeat domain 20 [Source:RGD Symbol;Acc:1306499]
-1.76162	2.42399	-7.76977	8.56882e-07	2.85214e-05	5.91133	ENSRNOG00000008086	Dpf3	double PHD fingers 3 [Source:RGD Symbol;Acc:1309052]
-4.14763	0.545022	-7.76646	8.61545e-07	2.85214e-05	3.3499	ENSRNOG00000061244	NA	NA
-1.036	5.62694	-7.74708	8.89382e-07	2.93524e-05	5.77943	ENSRNOG00000013774	Lmnb1	lamin B1 [Source:RGD Symbol;Acc:620522]
-0.883793	7.6534	-7.74509	8.92296e-07	2.93582e-05	5.66776	ENSRNOG00000006832	Zdhhc5	zinc finger DHHC-type palmitoyltransferase 5 [Source:RGD Symbol;Acc:1589737]
0.598835	4.28118	7.74208	8.96715e-07	2.94134e-05	5.88436	ENSRNOG00000053607	Fam217b	family with sequence similarity 217, member B [Source:RGD Symbol;Acc:1311952]
1.35032	6.53354	7.73835	9.02239e-07	2.95043e-05	5.66064	ENSRNOG00000053086	Selenop	selenoprotein P [Source:RGD Symbol;Acc:3660]
-0.471981	7.08687	-7.72932	9.15726e-07	2.98543e-05	5.64348	ENSRNOG00000013281	Mib1	MIB E3 ubiquitin protein ligase 1 [Source:RGD Symbol;Acc:1307195]
1.16298	5.26867	7.7267	9.19691e-07	2.98927e-05	5.75207	ENSRNOG00000014961	Pdpn	podoplanin [Source:RGD Symbol;Acc:61819]
-0.525324	6.81797	-7.72416	9.23541e-07	2.99272e-05	5.6442	ENSRNOG00000027300	Ttc7b	tetratricopeptide repeat domain 7B [Source:RGD Symbol;Acc:1305920]
1.61581	2.41534	7.71303	9.40619e-07	3.0235e-05	5.98244	ENSRNOG00000022320	Primpol	primase and DNA directed polymerase [Source:RGD Symbol;Acc:1562119]
0.607194	6.35584	7.71246	9.41496e-07	3.0235e-05	5.62743	ENSRNOG00000023197	Zfp608	zinc finger protein 608 [Source:RGD Symbol;Acc:1306824]
-1.13253	6.58615	-7.71371	9.39561e-07	3.0235e-05	5.64804	ENSRNOG00000019020	Bbs2	Bardet-Biedl syndrome 2 [Source:RGD Symbol;Acc:71091]
2.06582	2.65038	7.69126	9.74986e-07	3.11697e-05	5.9357	ENSRNOG00000017311	Me3	malic enzyme 3 [Source:RGD Symbol;Acc:1311070]
0.489084	4.88464	7.69037	9.76416e-07	3.11697e-05	5.71308	ENSRNOG00000018198	Dapk1	death associated protein kinase 1 [Source:RGD Symbol;Acc:1311629]
1.60517	3.90823	7.68663	9.82454e-07	3.11769e-05	5.83081	ENSRNOG00000004737	Cd48	Cd48 molecule [Source:RGD Symbol;Acc:620620]
-1.48358	4.87184	-7.68712	9.81667e-07	3.11769e-05	5.79243	ENSRNOG00000009881	Fam161a	FAM161 centrosomal protein A [Source:RGD Symbol;Acc:1304999]
1.02298	6.21778	7.68055	9.92366e-07	3.13062e-05	5.57383	ENSRNOG00000002146	Pkd2	polycystin 2, transient receptor potential cation channel [Source:RGD Symbol;Acc:1559992]
-0.662198	5.58295	-7.68076	9.92021e-07	3.13062e-05	5.65059	ENSRNOG00000012928	Prmt9	protein arginine methyltransferase 9 [Source:RGD Symbol;Acc:1306157]
-0.629144	9.0906	-7.67845	9.95813e-07	3.13228e-05	5.56808	ENSRNOG00000012479	Impg1	interphotoreceptor matrix proteoglycan 1 [Source:RGD Symbol;Acc:620499]
-1.64567	5.16795	-7.65218	1.04002e-06	3.26176e-05	5.71547	ENSRNOG00000017489	Gse1	Gse1 coiled-coil protein [Source:RGD Symbol;Acc:1562686]
2.03736	3.15267	7.64233	1.05711e-06	3.3057e-05	5.86362	ENSRNOG00000023708	Tmem176a	transmembrane protein 176A [Source:RGD Symbol;Acc:1310725]
0.592666	7.33925	7.63832	1.06416e-06	3.31808e-05	5.48035	ENSRNOG00000000233	Grm6	glutamate metabotropic receptor 6 [Source:RGD Symbol;Acc:2747]
2.53469	3.62908	7.62973	1.07941e-06	3.35588e-05	5.83934	ENSRNOG00000015746	Kcng4	potassium voltage-gated channel modifier subfamily G member 4 [Source:RGD Symbol;Acc:1308553]
1.39786	4.47573	7.62323	1.09111e-06	3.38244e-05	5.65921	ENSRNOG00000019776	Sh3gl3	SH3 domain containing GRB2 like 3, endophilin A3 [Source:RGD Symbol;Acc:620578]
1.60554	4.19716	7.62118	1.09482e-06	3.38417e-05	5.66648	ENSRNOG00000042426	Cyp4v3	cytochrome P450, family 4, subfamily v, polypeptide 3 [Source:RGD Symbol;Acc:708530]
0.571956	6.258	7.61922	1.0984e-06	3.38546e-05	5.47082	ENSRNOG00000003931	Arsg	arylsulfatase G [Source:RGD Symbol;Acc:1306571]
-0.55289	8.26561	-7.6093	1.11663e-06	3.43179e-05	5.43752	ENSRNOG00000026171	Bbs4	Bardet-Biedl syndrome 4 [Source:RGD Symbol;Acc:1309134]
0.97611	8.68821	7.60366	1.12714e-06	3.4542e-05	5.43104	ENSRNOG00000004067	Nrcam	neuronal cell adhesion molecule [Source:RGD Symbol;Acc:3209]
-1.39795	7.45527	-7.59315	1.147e-06	3.50506e-05	5.42023	ENSRNOG00000009719	C2cd2l	C2CD2-like [Source:RGD Symbol;Acc:1310281]
1.02135	4.45212	7.59057	1.15194e-06	3.51013e-05	5.59841	ENSRNOG00000002061	Ptpn13	protein tyrosine phosphatase, non-receptor type 13 [Source:RGD Symbol;Acc:1563360]
-0.651431	5.9773	-7.58678	1.15922e-06	3.52232e-05	5.46529	ENSRNOG00000053814	Synrg	synergin, gamma [Source:RGD Symbol;Acc:620684]
1.36453	2.37647	7.58319	1.16616e-06	3.53341e-05	5.77386	ENSRNOG00000025115	Exph5	exophilin 5 [Source:RGD Symbol;Acc:1560308]
-0.94384	5.18968	-7.58082	1.17077e-06	3.53739e-05	5.5346	ENSRNOG00000009117	Otub2	OTU deubiquitinase, ubiquitin aldehyde binding 2 [Source:RGD Symbol;Acc:1306688]
-1.154	9.53082	-7.57702	1.17819e-06	3.5498e-05	5.40082	ENSRNOG00000013009	Ldha	lactate dehydrogenase A [Source:RGD Symbol;Acc:2996]
1.75586	2.59933	7.57142	1.18923e-06	3.57302e-05	5.75455	ENSRNOG00000013907	Sall1	spalt-like transcription factor 1 [Source:RGD Symbol;Acc:1309916]
0.993666	8.25332	7.56218	1.20767e-06	3.60822e-05	5.35476	ENSRNOG00000006305	Slc38a2	solute carrier family 38, member 2 [Source:RGD Symbol;Acc:69420]
0.488914	7.08517	7.56261	1.2068e-06	3.60822e-05	5.35241	ENSRNOG00000060687	Slc24a3	solute carrier family 24 member 3 [Source:RGD Symbol;Acc:69256]
-0.497314	6.07206	-7.55713	1.21789e-06	3.62865e-05	5.39895	ENSRNOG00000012923	Rprd1b	regulation of nuclear pre-mRNA domain containing 1B [Source:RGD Symbol;Acc:1304782]
1.22878	5.9636	7.5538	1.22468e-06	3.63875e-05	5.37429	ENSRNOG00000015036	Ccn2	cellular communication network factor 2 [Source:RGD Symbol;Acc:621392]
1.82266	1.88276	7.54846	1.23563e-06	3.66114e-05	5.51009	ENSRNOG00000003538	Adamts4	ADAM metallopeptidase with thrombospondin type 1 motif, 4 [Source:RGD Symbol;Acc:621242]
1.09623	4.49721	7.54288	1.24718e-06	3.6852e-05	5.49462	ENSRNOG00000029212	Vcan	versican [Source:RGD Symbol;Acc:619940]
-0.562923	5.88487	-7.54043	1.2523e-06	3.69016e-05	5.3764	ENSRNOG00000020317	Rab5if	RAB5 interacting factor [Source:RGD Symbol;Acc:1307752]
1.92701	3.95867	7.53211	1.26983e-06	3.73156e-05	5.5845	ENSRNOG00000002045	Anxa3	annexin A3 [Source:RGD Symbol;Acc:2119]
-0.827968	6.51999	-7.52794	1.2787e-06	3.74736e-05	5.32133	ENSRNOG00000000323	Prdm1	PR/SET domain 1 [Source:RGD Symbol;Acc:1311765]
0.678343	5.8343	7.50919	1.31943e-06	3.85223e-05	5.30761	ENSRNOG00000020388	Inpp5f	inositol polyphosphate-5-phosphatase F [Source:RGD Symbol;Acc:1305777]
0.578751	7.74213	7.50818	1.32167e-06	3.85223e-05	5.25791	ENSRNOG00000047931	Tmsb4x	thymosin beta 4, X-linked [Source:RGD Symbol;Acc:621622]
1.20443	3.75904	7.49366	1.3542e-06	3.92571e-05	5.50324	ENSRNOG00000020470	Slc25a24	solute carrier family 25 member 24 [Source:RGD Symbol;Acc:1311982]
-0.922375	6.39369	-7.49516	1.35078e-06	3.92571e-05	5.28618	ENSRNOG00000005138	Pip4k2c	phosphatidylinositol-5-phosphate 4-kinase type 2 gamma [Source:RGD Symbol;Acc:621711]
0.911216	7.89896	7.48104	1.38314e-06	3.99207e-05	5.21222	ENSRNOG00000004342	Ahr	aryl hydrocarbon receptor [Source:RGD Symbol;Acc:2074]
0.748931	3.83849	7.48044	1.38453e-06	3.99207e-05	5.50347	ENSRNOG00000014034	Olfml2a	olfactomedin-like 2A [Source:RGD Symbol;Acc:1311651]
0.781787	7.28383	7.47862	1.38878e-06	3.99358e-05	5.20567	ENSRNOG00000018350	Shtn1	shootin 1 [Source:RGD Symbol;Acc:1311558]
0.614884	5.32612	7.46481	1.42134e-06	4.06541e-05	5.27546	ENSRNOG00000004189	Helb	DNA helicase B [Source:RGD Symbol;Acc:1560103]
-0.89606	8.15982	-7.46562	1.41942e-06	4.06541e-05	5.19031	ENSRNOG00000019913	Mta2	metastasis associated 1 family, member 2 [Source:RGD Symbol;Acc:1306743]
-1.00248	5.72746	-7.46282	1.4261e-06	4.06816e-05	5.29088	ENSRNOG00000052704	Dnah10	dynein, axonemal, heavy chain 10 [Source:RGD Symbol;Acc:619988]
-0.570131	6.334	-7.44564	1.46789e-06	4.17629e-05	5.18865	ENSRNOG00000030639	Usp13	ubiquitin specific peptidase 13 [Source:RGD Symbol;Acc:1306044]
1.33674	2.98304	7.42884	1.50998e-06	4.27337e-05	5.49147	ENSRNOG00000031163	Nfkbiz	NFKB inhibitor zeta [Source:RGD Symbol;Acc:1310834]
1.12974	3.61201	7.42953	1.50822e-06	4.27337e-05	5.4081	ENSRNOG00000009871	Piwil2	piwi-like RNA-mediated gene silencing 2 [Source:RGD Symbol;Acc:1306964]
-1.24787	5.53047	-7.42486	1.52014e-06	4.2908e-05	5.22883	ENSRNOG00000010050	Stard9	StAR-related lipid transfer domain containing 9 [Source:RGD Symbol;Acc:1593360]
-0.599742	8.06291	-7.41232	1.55262e-06	4.37097e-05	5.09612	ENSRNOG00000024085	Tmem237	transmembrane protein 237 [Source:RGD Symbol;Acc:1306705]
0.970169	5.44399	7.40694	1.56676e-06	4.39924e-05	5.16591	ENSRNOG00000010358	Sh3rf1	SH3 domain containing ring finger 1 [Source:RGD Symbol;Acc:735154]
1.57984	5.93144	7.4037	1.57535e-06	4.4118e-05	5.1134	ENSRNOG00000058646	Zfp36l1	zinc finger protein 36, C3H type-like 1 [Source:RGD Symbol;Acc:62009]
1.15622	3.2826	7.39863	1.58889e-06	4.42756e-05	5.41031	ENSRNOG00000005770	Sostdc1	sclerostin domain containing 1 [Source:RGD Symbol;Acc:628877]
0.949026	6.32534	7.3985	1.58923e-06	4.42756e-05	5.08964	ENSRNOG00000019556	Cd9	CD9 molecule [Source:RGD Symbol;Acc:2318]
0.510264	6.27269	7.382	1.63416e-06	4.54093e-05	5.06298	ENSRNOG00000026866	Syn3	synapsin III [Source:RGD Symbol;Acc:3799]
3.14793	2.60671	7.37824	1.64459e-06	4.5581e-05	5.42783	ENSRNOG00000015972	Ano5	anoctamin 5 [Source:RGD Symbol;Acc:1564265]
2.0588	2.58009	7.37366	1.65736e-06	4.56776e-05	5.43342	ENSRNOG00000000853	Aif1	allograft inflammatory factor 1 [Source:RGD Symbol;Acc:61924]
-0.510778	6.48779	-7.37242	1.66085e-06	4.56776e-05	5.05015	ENSRNOG00000006514	Vezt	vezatin, adherens junctions transmembrane protein [Source:RGD Symbol;Acc:1359117]
-0.6407	5.33971	-7.37508	1.6534e-06	4.56776e-05	5.16302	ENSRNOG00000008850	Ttc5	tetratricopeptide repeat domain 5 [Source:RGD Symbol;Acc:1311284]
-1.11839	4.09615	-7.36516	1.68138e-06	4.60063e-05	5.30616	ENSRNOG00000008459	Anapc13	anaphase promoting complex subunit 13 [Source:RGD Symbol;Acc:1583270]
-1.91861	4.76692	-7.36653	1.6775e-06	4.60063e-05	5.29399	ENSRNOG00000013039	Add1	adducin 1 [Source:RGD Symbol;Acc:2041]
-1.04627	3.41188	-7.35197	1.71936e-06	4.69257e-05	5.3709	ENSRNOG00000021312	Dnaaf5	dynein, axonemal, assembly factor 5 [Source:RGD Symbol;Acc:1566028]
1.08273	4.21766	7.34377	1.74341e-06	4.73413e-05	5.20478	ENSRNOG00000012721	Ednra	endothelin receptor type A [Source:RGD Symbol;Acc:2535]
1.05432	5.95532	7.34526	1.73903e-06	4.73413e-05	5.01111	ENSRNOG00000010593	Ctnnal1	catenin alpha-like 1 [Source:RGD Symbol;Acc:1311434]
0.652272	4.9739	7.33114	1.78117e-06	4.82445e-05	5.08668	ENSRNOG00000001843	Bcl6	BCL6, transcription repressor [Source:RGD Symbol;Acc:1309345]
1.78846	1.83472	7.32416	1.80242e-06	4.86629e-05	5.29021	ENSRNOG00000018759	Slc45a2	solute carrier family 45, member 2 [Source:RGD Symbol;Acc:1306690]
1.56215	2.89352	7.32309	1.80569e-06	4.86629e-05	5.3362	ENSRNOG00000009227	Aplnr	apelin receptor [Source:RGD Symbol;Acc:621645]
-0.467354	5.84851	-7.3161	1.82725e-06	4.88756e-05	4.99045	ENSRNOG00000025222	Pcid2	PCI domain containing 2 [Source:RGD Symbol;Acc:1307041]
-1.02018	6.85858	-7.3161	1.82725e-06	4.88756e-05	4.94684	ENSRNOG00000014538	Nxnl2	nucleoredoxin-like 2 [Source:RGD Symbol;Acc:1594820]
-1.73503	5.74274	-7.31767	1.82239e-06	4.88756e-05	5.07323	ENSRNOG00000042289	Plcxd2	phosphatidylinositol-specific phospholipase C, X domain containing 2 [Source:RGD Symbol;Acc:1563504]
1.40385	5.62812	7.30995	1.84645e-06	4.92468e-05	4.97339	ENSRNOG00000000164	Lamp2	lysosomal-associated membrane protein 2 [Source:RGD Symbol;Acc:2990]
-1.26576	5.29031	-7.30872	1.85031e-06	4.92468e-05	5.06584	ENSRNOG00000007637	Acer2	alkaline ceramidase 2 [Source:RGD Symbol;Acc:1304629]
1.29811	3.71857	7.30075	1.87558e-06	4.97957e-05	5.20988	ENSRNOG00000040266	Cdkl4	cyclin-dependent kinase-like 4 [Source:RGD Symbol;Acc:1583704]
2.23989	2.7249	7.2983	1.88339e-06	4.98797e-05	5.29902	ENSRNOG00000039759	Gpr34	G protein-coupled receptor 34 [Source:RGD Symbol;Acc:1563681]
-0.843974	4.4457	-7.29633	1.88974e-06	4.99245e-05	5.15009	ENSRNOG00000022767	Elfn1	extracellular leucine-rich repeat and fibronectin type III domain containing 1 [Source:RGD Symbol;Acc:1308787]
0.938357	5.73694	7.28898	1.91354e-06	5.0429e-05	4.93064	ENSRNOG00000004874	Flrt3	fibronectin leucine rich transmembrane protein 3 [Source:RGD Symbol;Acc:1566005]
0.85219	4.44187	7.2843	1.92885e-06	5.07079e-05	5.06033	ENSRNOG00000005437	Rida	reactive intermediate imine deaminase A homolog [Source:RGD Symbol;Acc:70940]
1.07508	6.06359	7.28172	1.93733e-06	5.08062e-05	4.89743	ENSRNOG00000014142	Ogfrl1	opioid growth factor receptor-like 1 [Source:RGD Symbol;Acc:1308498]
-0.714582	4.61209	-7.27847	1.9481e-06	5.09643e-05	5.06533	ENSRNOG00000025704	Yod1	YOD1 deubiquitinase [Source:RGD Symbol;Acc:1359726]
-0.660621	4.84566	-7.27552	1.95789e-06	5.10958e-05	5.0346	ENSRNOG00000029740	Slc35g1	solute carrier family 35, member G1 [Source:RGD Symbol;Acc:1595908]
-1.50474	5.42628	-7.26106	2.00681e-06	5.22452e-05	5.00157	ENSRNOG00000056955	Bicdl1	BICD family like cargo adaptor 1 [Source:RGD Symbol;Acc:1310292]
-1.24188	4.61365	-7.25952	2.01207e-06	5.22554e-05	5.06799	ENSRNOG00000058916	Ccdc65	coiled-coil domain containing 65 [Source:RGD Symbol;Acc:1595842]
1.09526	3.10433	7.25609	2.02389e-06	5.22766e-05	5.18406	ENSRNOG00000013944	Zc3hav1l	zinc finger CCCH-type containing, antiviral 1 like [Source:RGD Symbol;Acc:1309236]
1.02331	3.22679	7.25364	2.03238e-06	5.22766e-05	5.17589	ENSRNOG00000032208	Eda	ectodysplasin-A [Source:RGD Symbol;Acc:1563178]
0.48209	7.14597	7.25583	2.02479e-06	5.22766e-05	4.81826	ENSRNOG00000022429	Minar2	membrane integral NOTCH2 associated receptor 2 [Source:RGD Symbol;Acc:1312005]
-0.51781	5.547	-7.25371	2.03214e-06	5.22766e-05	4.91767	ENSRNOG00000009536	Pgp	phosphoglycolate phosphatase [Source:RGD Symbol;Acc:1307773]
0.815392	3.85933	7.24421	2.06539e-06	5.26209e-05	5.08697	ENSRNOG00000030285	Epha3	Eph receptor A3 [Source:RGD Symbol;Acc:68389]
-0.571273	8.37276	-7.24449	2.06438e-06	5.26209e-05	4.80505	ENSRNOG00000010037	Epb41	erythrocyte membrane protein band 4.1 [Source:RGD Symbol;Acc:1564762]
-0.732124	8.59718	-7.24546	2.06096e-06	5.26209e-05	4.80974	ENSRNOG00000052061	Ppef2	protein phosphatase with EF-hand domain 2 [Source:RGD Symbol;Acc:1307093]
-1.12711	5.56188	-7.2467	2.0566e-06	5.26209e-05	4.95146	ENSRNOG00000052990	Cers5	ceramide synthase 5 [Source:RGD Symbol;Acc:1311597]
-1.53999	5.91001	-7.23982	2.08093e-06	5.28912e-05	4.91789	ENSRNOG00000021359	Mtfr1	mitochondrial fission regulator 1 [Source:RGD Symbol;Acc:1304936]
1.58077	6.34548	7.23024	2.1153e-06	5.36377e-05	4.78896	ENSRNOG00000025587	Plagl1	PLAG1 like zinc finger 1 [Source:RGD Symbol;Acc:3014]
2.08205	2.14568	7.22643	2.12913e-06	5.38608e-05	5.18084	ENSRNOG00000012881	Fgl2	fibrinogen-like 2 [Source:RGD Symbol;Acc:620170]
-1.96213	5.87406	-7.21819	2.15936e-06	5.44972e-05	4.89582	ENSRNOG00000008323	Pitpnm3	PITPNM family member 3 [Source:RGD Symbol;Acc:1308200]
2.4185	1.57026	7.21234	2.18111e-06	5.4917e-05	4.95846	ENSRNOG00000042477	Clrn1	clarin 1 [Source:RGD Symbol;Acc:628779]
0.55288	4.81047	7.21075	2.18706e-06	5.49377e-05	4.903	ENSRNOG00000006628	Dusp16	dual specificity phosphatase 16 [Source:RGD Symbol;Acc:1310721]
-2.61661	3.75089	-7.20877	2.19452e-06	5.49962e-05	5.07828	ENSRNOG00000028765	Ttc24	tetratricopeptide repeat domain 24 [Source:RGD Symbol;Acc:2319887]
0.577552	6.41902	7.19508	2.2466e-06	5.60397e-05	4.72748	ENSRNOG00000002626	Car10	carbonic anhydrase 10 [Source:RGD Symbol;Acc:2322930]
-0.78184	7.63063	-7.19576	2.24402e-06	5.60397e-05	4.71779	ENSRNOG00000015732	Bcl2l2	Bcl2-like 2 [Source:RGD Symbol;Acc:620717]
1.29595	2.01862	7.19068	2.26363e-06	5.62467e-05	5.08819	ENSRNOG00000002413	Gpc4	glypican 4 [Source:RGD Symbol;Acc:1359399]
0.504623	6.70598	7.19023	2.26539e-06	5.62467e-05	4.71167	ENSRNOG00000013147	Cacna1d	calcium voltage-gated channel subunit alpha1 D [Source:RGD Symbol;Acc:70973]
-1.70867	4.1176	-7.17691	2.31779e-06	5.74147e-05	5.02376	ENSRNOG00000028523	Tctn1	tectonic family member 1 [Source:RGD Symbol;Acc:1566266]
1.07369	8.30006	7.17168	2.33871e-06	5.77995e-05	4.67467	ENSRNOG00000002418	Tgfb2	transforming growth factor, beta 2 [Source:RGD Symbol;Acc:70491]
1.00738	4.1591	7.16816	2.35293e-06	5.80172e-05	4.89404	ENSRNOG00000017155	Nck2	NCK adaptor protein 2 [Source:RGD Symbol;Acc:1305965]
-0.769956	9.46981	-7.16347	2.37194e-06	5.83519e-05	4.6832	ENSRNOG00000007304	Herc3	HECT and RLD domain containing E3 ubiquitin protein ligase 3 [Source:RGD Symbol;Acc:1307803]
0.738165	6.28024	7.15894	2.39049e-06	5.86737e-05	4.66695	ENSRNOG00000001575	Grik1	glutamate ionotropic receptor kainate type subunit 1 [Source:RGD Symbol;Acc:2732]
0.716566	5.15243	7.15709	2.39812e-06	5.87265e-05	4.75609	ENSRNOG00000004281	Cobl	cordon-bleu WH2 repeat protein [Source:RGD Symbol;Acc:1312002]
1.07624	3.0875	7.15398	2.41098e-06	5.8907e-05	5.01369	ENSRNOG00000010840	Adamtsl3	ADAMTS-like 3 [Source:RGD Symbol;Acc:1305155]
0.558089	5.1379	7.14526	2.44745e-06	5.96622e-05	4.74368	ENSRNOG00000012074	Ifngr1	interferon gamma receptor 1 [Source:RGD Symbol;Acc:620570]
1.06671	3.36493	7.14128	2.46428e-06	5.98006e-05	4.98197	ENSRNOG00000020811	Il6r	interleukin 6 receptor [Source:RGD Symbol;Acc:2902]
-0.755015	4.68692	-7.14256	2.45886e-06	5.98006e-05	4.83513	ENSRNOG00000022455	Cptp	ceramide-1-phosphate transfer protein [Source:RGD Symbol;Acc:1359656]
1.27286	4.70925	7.13889	2.47448e-06	5.99125e-05	4.77096	ENSRNOG00000031709	Ppfibp1	PPFIA binding protein 1 [Source:RGD Symbol;Acc:1310010]
-1.28372	3.2281	-7.13664	2.48409e-06	6.00099e-05	5.01676	ENSRNOG00000051510	Ccdc113	coiled-coil domain containing 113 [Source:RGD Symbol;Acc:1565763]
1.16031	8.6643	7.11712	2.56913e-06	6.11386e-05	4.58399	ENSRNOG00000016456	Il33	interleukin 33 [Source:RGD Symbol;Acc:1311155]
1.12054	3.5928	7.12434	2.53732e-06	6.11386e-05	4.9226	ENSRNOG00000036829	Nckap1l	NCK associated protein 1 like [Source:RGD Symbol;Acc:1312032]
0.926332	7.89114	7.12103	2.55183e-06	6.11386e-05	4.58128	ENSRNOG00000010748	Mtus1	microtubule associated scaffold protein 1 [Source:RGD Symbol;Acc:631381]
0.663185	4.87657	7.11922	2.5598e-06	6.11386e-05	4.72196	ENSRNOG00000028872	Rai14	retinoic acid induced 14 [Source:RGD Symbol;Acc:1305942]
0.621995	5.42273	7.11967	2.55785e-06	6.11386e-05	4.66238	ENSRNOG00000015654	Ghr	growth hormone receptor [Source:RGD Symbol;Acc:2687]
-0.413369	6.65839	-7.11676	2.57072e-06	6.11386e-05	4.5925	ENSRNOG00000021815	Lig3	DNA ligase 3 [Source:RGD Symbol;Acc:1309875]
-2.55767	6.40279	-7.1181	2.56477e-06	6.11386e-05	4.70811	ENSRNOG00000015402	Guca1a	guanylate cyclase activator 1A [Source:RGD Symbol;Acc:1308712]
0.632042	5.19194	7.11038	2.59918e-06	6.16789e-05	4.66534	ENSRNOG00000004048	Lrrk2	leucine-rich repeat kinase 2 [Source:RGD Symbol;Acc:1561168]
3.70096	2.03448	7.10685	2.61507e-06	6.17824e-05	4.56464	ENSRNOG00000010645	Lgals3	galectin 3 [Source:RGD Symbol;Acc:69356]
0.401559	6.12975	7.10768	2.61134e-06	6.17824e-05	4.59104	ENSRNOG00000002214	Klhl8	kelch-like family member 8 [Source:RGD Symbol;Acc:1304685]
0.442301	7.34967	7.10256	2.63454e-06	6.21056e-05	4.54662	ENSRNOG00000010311	Dzip1	DAZ interacting zinc finger protein 1 [Source:RGD Symbol;Acc:1307701]
1.10522	3.73498	7.09025	2.69121e-06	6.33026e-05	4.80928	ENSRNOG00000002751	Zdhhc15	zinc finger DHHC-type palmitoyltransferase 15 [Source:RGD Symbol;Acc:1562075]
-1.83427	5.08636	-7.07709	2.7532e-06	6.46188e-05	4.75759	ENSRNOG00000001216	Trpm2	transient receptor potential cation channel, subfamily M, member 2 [Source:RGD Symbol;Acc:1311889]
-0.453316	7.79191	-7.07107	2.78205e-06	6.51535e-05	4.49381	ENSRNOG00000010633	Acsl1	acyl-CoA synthetase long-chain family member 1 [Source:RGD Symbol;Acc:2015]
1.03889	4.50961	7.06582	2.80746e-06	6.53207e-05	4.66955	ENSRNOG00000008236	Decr1	2,4-dienoyl-CoA reductase 1 [Source:RGD Symbol;Acc:70999]
0.523527	4.78883	7.06671	2.80312e-06	6.53207e-05	4.65495	ENSRNOG00000049349	Tafa5	TAFA chemokine like family member 5 [Source:RGD Symbol;Acc:1562115]
-1.01207	3.35275	-7.06707	2.80139e-06	6.53207e-05	4.86349	ENSRNOG00000008775	Lrguk	leucine-rich repeats and guanylate kinase domain containing [Source:RGD Symbol;Acc:1308226]
0.64047	7.1449	7.06013	2.83529e-06	6.58253e-05	4.47173	ENSRNOG00000018417	Naa35	N(alpha)-acetyltransferase 35, NatC auxiliary subunit [Source:RGD Symbol;Acc:621771]
0.56812	4.59673	7.05516	2.85982e-06	6.62515e-05	4.65545	ENSRNOG00000005033	Acvr1	activin A receptor type 1 [Source:RGD Symbol;Acc:620200]
0.71251	6.26567	7.04856	2.89272e-06	6.68693e-05	4.47066	ENSRNOG00000011168	Micu2	mitochondrial calcium uptake 2 [Source:RGD Symbol;Acc:619739]
1.00456	4.91244	7.04708	2.90018e-06	6.68976e-05	4.58598	ENSRNOG00000039470	AC131360.1	protocadherin beta 18 [Source:MGI Symbol;Acc:MGI:2136756]
-2.32819	2.90167	-7.03258	2.97411e-06	6.84557e-05	4.82942	ENSRNOG00000016525	Susd3	sushi domain containing 3 [Source:RGD Symbol;Acc:1310933]
-0.952949	4.15861	-7.02511	3.01299e-06	6.92019e-05	4.71599	ENSRNOG00000003837	NA	NA
-0.559833	6.22047	-7.02325	3.02274e-06	6.92776e-05	4.4524	ENSRNOG00000009364	NA	NA
0.662668	4.68974	7.02174	3.03066e-06	6.9311e-05	4.58244	ENSRNOG00000009267	B3gnt2	UDP-GlcNAc:betaGal beta-1,3-N-acetylglucosaminyltransferase 2 [Source:RGD Symbol;Acc:1310077]
2.18192	4.88227	7.01738	3.05373e-06	6.969e-05	4.52888	ENSRNOG00000051922	AABR07059663.1	None
1.79524	3.82179	7.01269	3.07876e-06	7.0112e-05	4.69589	ENSRNOG00000000195	LOC108348048	von Willebrand factor A domain-containing protein 5A [Source:RGD Symbol;Acc:11476240]
0.542696	7.10315	7.00546	3.11776e-06	7.07775e-05	4.37387	ENSRNOG00000012364	Prickle2	prickle planar cell polarity protein 2 [Source:RGD Symbol;Acc:1306723]
-1.20055	5.60771	-7.00483	3.12118e-06	7.07775e-05	4.50445	ENSRNOG00000014798	Cstpp1	centriolar satellite-associated tubulin polyglutamylase complex regulator 1 [Source:RGD Symbol;Acc:1309540]
0.869294	4.43941	7.00261	3.13324e-06	7.09011e-05	4.56099	ENSRNOG00000006738	Fbxo32	F-box protein 32 [Source:RGD Symbol;Acc:620373]
1.36547	4.51865	6.99569	3.17126e-06	7.1607e-05	4.55287	ENSRNOG00000013321	Dock11	dedicator of cytokinesis 11 [Source:RGD Symbol;Acc:1564707]
-1.0926	3.14288	-6.99451	3.17779e-06	7.1607e-05	4.79214	ENSRNOG00000017548	Fam53a	family with sequence similarity 53, member A [Source:RGD Symbol;Acc:1563315]
-1.9427	7.1296	-6.9919	3.19224e-06	7.1782e-05	4.39511	ENSRNOG00000046326	Rp1l1	RP1 like 1 [Source:RGD Symbol;Acc:1586886]
0.551487	4.60225	6.98791	3.21454e-06	7.20929e-05	4.52637	ENSRNOG00000022505	Slc17a4	solute carrier family 17, member 4 [Source:RGD Symbol;Acc:1584758]
-1.34799	6.30206	-6.98702	3.21951e-06	7.20929e-05	4.4116	ENSRNOG00000027392	Ccdc187	coiled-coil domain containing 187 [Source:RGD Symbol;Acc:1565512]
-0.783516	5.87196	-6.98071	3.25514e-06	7.27388e-05	4.4178	ENSRNOG00000059268	Ppp1r10	protein phosphatase 1, regulatory subunit 10 [Source:RGD Symbol;Acc:620079]
0.805373	7.98224	6.97923	3.26355e-06	7.27752e-05	4.32837	ENSRNOG00000006857	Ndnf	neuron-derived neurotrophic factor [Source:RGD Symbol;Acc:1311080]
1.10813	2.06585	6.9731	3.29865e-06	7.34052e-05	4.76961	ENSRNOG00000021787	Zfp217	zinc finger protein 217 [Source:RGD Symbol;Acc:1308451]
0.787259	3.76823	6.96484	3.34659e-06	7.43177e-05	4.61401	ENSRNOG00000046264	Pcdhb7	protocadherin beta 7 [Source:RGD Symbol;Acc:1309422]
1.92023	3.15066	6.96204	3.36301e-06	7.43538e-05	4.69031	ENSRNOG00000000655	Ptprc	protein tyrosine phosphatase, receptor type, C [Source:RGD Symbol;Acc:3451]
1.33773	4.02429	6.96233	3.36127e-06	7.43538e-05	4.56257	ENSRNOG00000015812	Tm4sf1	transmembrane 4 L six family member 1 [Source:RGD Symbol;Acc:1309652]
0.742355	8.3065	6.96102	3.369e-06	7.43538e-05	4.29885	ENSRNOG00000003392	Grsf1	G-rich RNA sequence binding factor 1 [Source:RGD Symbol;Acc:1310858]
-0.791892	6.69131	-6.95669	3.39457e-06	7.47642e-05	4.31151	ENSRNOG00000042821	Cd59	CD59 molecule [Source:RGD Symbol;Acc:2311]
2.24035	2.73938	6.95397	3.41072e-06	7.48127e-05	4.72703	ENSRNOG00000016117	Myof	myoferlin [Source:RGD Symbol;Acc:1564216]
-0.415106	6.64709	-6.95415	3.40964e-06	7.48127e-05	4.30312	ENSRNOG00000031827	Arih2	ariadne RBR E3 ubiquitin protein ligase 2 [Source:RGD Symbol;Acc:1305839]
-0.68051	7.69551	-6.94654	3.45536e-06	7.56371e-05	4.27163	ENSRNOG00000000895	Rabgef1	RAB guanine nucleotide exchange factor 1 [Source:RGD Symbol;Acc:1307295]
1.73397	1.91306	6.94413	3.46996e-06	7.58021e-05	4.71998	ENSRNOG00000010263	Cldn11	claudin 11 [Source:RGD Symbol;Acc:71081]
-0.77699	6.18587	-6.93252	3.54113e-06	7.7105e-05	4.29104	ENSRNOG00000000609	Ipmk	inositol polyphosphate multikinase [Source:RGD Symbol;Acc:620954]
-0.78851	5.10702	-6.93206	3.54398e-06	7.7105e-05	4.41337	ENSRNOG00000007681	Brd3	bromodomain containing 3 [Source:RGD Symbol;Acc:1308925]
-0.662137	7.48672	-6.92956	3.55955e-06	7.7287e-05	4.2428	ENSRNOG00000003970	Tnpo2	transportin 2 [Source:RGD Symbol;Acc:1310356]
0.792345	8.25501	6.91624	3.6436e-06	7.86343e-05	4.21788	ENSRNOG00000005711	Ptprd	protein tyrosine phosphatase, receptor type, D [Source:RGD Symbol;Acc:1561090]
0.61379	5.20746	6.91733	3.63664e-06	7.86343e-05	4.34031	ENSRNOG00000015321	Moxd1	monooxygenase, DBH-like 1 [Source:RGD Symbol;Acc:1310033]
-0.394604	7.16506	-6.91802	3.63227e-06	7.86343e-05	4.22281	ENSRNOG00000024632	Atf6	activating transcription factor 6 [Source:RGD Symbol;Acc:1305471]
0.486646	5.97872	6.91363	3.6603e-06	7.88362e-05	4.24942	ENSRNOG00000010303	Trim32	tripartite motif-containing 32 [Source:RGD Symbol;Acc:1305238]
1.33416	4.25329	6.90767	3.6988e-06	7.95057e-05	4.42601	ENSRNOG00000004160	Prps2	phosphoribosyl pyrophosphate synthetase 2 [Source:RGD Symbol;Acc:3415]
0.480344	6.70414	6.90228	3.7339e-06	8.00996e-05	4.19542	ENSRNOG00000023312	Lonrf2	LON peptidase N-terminal domain and ring finger 2 [Source:RGD Symbol;Acc:1562137]
0.918493	7.36756	6.88347	3.85933e-06	8.26251e-05	4.15287	ENSRNOG00000042833	Prp2l1	proline rich protein 2-like 1 [Source:RGD Symbol;Acc:735046]
1.33698	7.13664	6.8822	3.86799e-06	8.26455e-05	4.15121	ENSRNOG00000023969	Herc6	HECT and RLD domain containing E3 ubiquitin protein ligase family member 6 [Source:RGD Symbol;Acc:1561739]
-0.509394	6.08902	-6.8768	3.90484e-06	8.3267e-05	4.19442	ENSRNOG00000054468	Fam219b	family with sequence similarity 219, member B [Source:RGD Symbol;Acc:1310727]
3.45592	1.10152	6.8602	4.02063e-06	8.55659e-05	3.82541	ENSRNOG00000046452	Fcgr2b	Fc gamma receptor 2B [Source:RGD Symbol;Acc:631331]
-1.74988	5.49318	-6.8412	4.15743e-06	8.83023e-05	4.24392	ENSRNOG00000049075	Fabp5	fatty acid binding protein 5 [Source:RGD Symbol;Acc:70997]
-0.627794	7.24845	-6.83965	4.16884e-06	8.83696e-05	4.08025	ENSRNOG00000055382	Hcn1	hyperpolarization-activated cyclic nucleotide-gated potassium channel 1 [Source:RGD Symbol;Acc:620688]
1.17409	4.52569	6.83292	4.21861e-06	8.92482e-05	4.24671	ENSRNOG00000006144	Cntn3	contactin 3 [Source:RGD Symbol;Acc:3253]
1.63832	2.08488	6.82873	4.24996e-06	8.97344e-05	4.48454	ENSRNOG00000000907	Alox5ap	arachidonate 5-lipoxygenase activating protein [Source:RGD Symbol;Acc:2097]
0.734653	3.66861	6.8251	4.27723e-06	9.01326e-05	4.36563	ENSRNOG00000058157	Ldlrad3	low density lipoprotein receptor class A domain containing 3 [Source:RGD Symbol;Acc:1307846]
-1.35623	4.32856	-6.8224	4.29769e-06	9.03863e-05	4.30996	ENSRNOG00000018716	Dennd2c	DENN domain containing 2C [Source:RGD Symbol;Acc:1308197]
-2.1521	7.13652	-6.82074	4.31033e-06	9.04747e-05	4.09077	ENSRNOG00000019914	Tlcd3b	TLC domain containing 3B [Source:RGD Symbol;Acc:1308215]
-0.493775	7.29991	-6.8177	4.33349e-06	9.07832e-05	4.0401	ENSRNOG00000020056	Retreg3	reticulophagy regulator family member 3 [Source:RGD Symbol;Acc:1561189]
1.31389	3.8367	6.81384	4.36318e-06	9.1227e-05	4.34285	ENSRNOG00000024799	Cd93	CD93 molecule [Source:RGD Symbol;Acc:621251]
2.20198	2.50465	6.80969	4.39527e-06	9.17191e-05	4.48826	ENSRNOG00000021412	Slfn13	schlafen family member 13 [Source:RGD Symbol;Acc:1359139]
-0.403088	6.71263	-6.80718	4.41483e-06	9.17702e-05	4.03124	ENSRNOG00000022015	Cntrl	centriolin [Source:RGD Symbol;Acc:1305317]
-1.21534	4.90254	-6.80823	4.40665e-06	9.17702e-05	4.23727	ENSRNOG00000027463	Adamts3	ADAM metallopeptidase with thrombospondin type 1, motif 3 [Source:RGD Symbol;Acc:1310750]
0.599838	6.54171	6.80079	4.46503e-06	9.26342e-05	4.01325	ENSRNOG00000021012	Rfx5	regulatory factor X5 [Source:RGD Symbol;Acc:1311677]
0.881657	4.65	6.79711	4.49419e-06	9.30592e-05	4.18004	ENSRNOG00000053631	Tdrd9	tudor domain containing 9 [Source:RGD Symbol;Acc:1306942]
0.617229	6.43758	6.7914	4.53981e-06	9.38228e-05	4.00075	ENSRNOG00000010824	Parp8	poly (ADP-ribose) polymerase family, member 8 [Source:RGD Symbol;Acc:1587384]
0.714442	5.9228	6.78751	4.57116e-06	9.4154e-05	4.01999	ENSRNOG00000011195	Prkra	protein activator of interferon induced protein kinase EIF2AK2 [Source:RGD Symbol;Acc:1306707]
-1.3447	8.10415	-6.78724	4.57339e-06	9.4154e-05	3.98783	ENSRNOG00000003738	Ush2a	usherin [Source:RGD Symbol;Acc:628777]
1.29851	5.48297	6.78488	4.59251e-06	9.42364e-05	4.0624	ENSRNOG00000042220	Vsx1	visual system homeobox 1 [Source:RGD Symbol;Acc:1305667]
0.629825	4.19764	6.78339	4.60463e-06	9.42364e-05	4.22585	ENSRNOG00000007707	Zfp467	zinc finger protein 467 [Source:RGD Symbol;Acc:1561603]
-0.60036	5.72819	-6.78347	4.60401e-06	9.42364e-05	4.06063	ENSRNOG00000031671	Rasgef1a	RasGEF domain family, member 1A [Source:RGD Symbol;Acc:1305836]
-0.915897	4.20569	-6.78242	4.61254e-06	9.42364e-05	4.25151	ENSRNOG00000014659	Ebpl	EBP like [Source:RGD Symbol;Acc:1304571]
-0.742154	6.3838	-6.77979	4.63412e-06	9.44973e-05	4.01073	ENSRNOG00000001158	Abcg1	ATP binding cassette subfamily G member 1 [Source:RGD Symbol;Acc:620294]
-1.31508	6.59734	-6.77822	4.64699e-06	9.45799e-05	4.02264	ENSRNOG00000010953	Icmt	isoprenylcysteine carboxyl methyltransferase [Source:RGD Symbol;Acc:621618]
1.07229	1.73521	6.7743	4.67942e-06	9.50595e-05	4.4328	ENSRNOG00000049052	Sgk3	serum/glucocorticoid regulated kinase family, member 3 [Source:RGD Symbol;Acc:620242]
1.08458	7.10985	6.76458	4.76073e-06	9.65286e-05	3.9371	ENSRNOG00000011944	Snx10	sorting nexin 10 [Source:RGD Symbol;Acc:1305782]
0.925006	7.84889	6.75964	4.80269e-06	9.71956e-05	3.93033	ENSRNOG00000006865	Laptm4a	lysosomal protein transmembrane 4 alpha [Source:RGD Symbol;Acc:735179]
0.857885	7.11087	6.75238	4.86493e-06	9.82268e-05	3.91516	ENSRNOG00000008765	Zfhx4	zinc finger homeobox 4 [Source:RGD Symbol;Acc:1563022]
0.7326	5.15517	6.75157	4.87196e-06	9.82268e-05	4.03016	ENSRNOG00000019937	Kcnk1	potassium two pore domain channel subfamily K member 1 [Source:RGD Symbol;Acc:621447]
-1.80543	7.17579	-6.7478	4.90469e-06	9.87012e-05	3.94984	ENSRNOG00000018526	Dlg4	discs large MAGUK scaffold protein 4 [Source:RGD Symbol;Acc:68424]
0.997507	6.53272	6.74526	4.92682e-06	9.89608e-05	3.91035	ENSRNOG00000009715	Me1	malic enzyme 1 [Source:RGD Symbol;Acc:3074]
0.958201	4.49038	6.74355	4.94183e-06	9.90767e-05	4.09239	ENSRNOG00000024040	Mb21d2	Mab-21 domain containing 2 [Source:RGD Symbol;Acc:1559643]
0.913862	5.10664	6.73671	5.00224e-06	0.000100101	3.99828	ENSRNOG00000038319	Akr1c19	aldo-keto reductase family 1, member C19 [Source:RGD Symbol;Acc:1562954]
1.37931	2.89649	6.71967	5.15622e-06	0.00010299	4.27446	ENSRNOG00000009401	Lmo2	LIM domain only 2 [Source:RGD Symbol;Acc:1307101]
1.13424	2.16565	6.71334	5.21461e-06	0.00010372	4.32874	ENSRNOG00000028470	Gdpd4	glycerophosphodiester phosphodiesterase domain containing 4 [Source:RGD Symbol;Acc:1585799]
1.08486	4.9508	6.71257	5.22177e-06	0.00010372	3.99502	ENSRNOG00000000723	NA	NA
0.976867	4.77014	6.71304	5.2174e-06	0.00010372	4.00575	ENSRNOG00000005686	Suclg2	succinate-CoA ligase GDP-forming subunit beta [Source:RGD Symbol;Acc:1305008]
0.609378	4.52098	6.71049	5.2412e-06	0.000103913	4.05243	ENSRNOG00000038459	Ulk3	unc-51 like kinase 3 [Source:RGD Symbol;Acc:1587417]
1.12405	6.92693	6.69343	5.40295e-06	0.000106923	3.81573	ENSRNOG00000032871	Mlc1	modulator of VRAC current 1 [Source:RGD Symbol;Acc:1308552]
0.504515	6.46316	6.69044	5.43187e-06	0.000107297	3.81734	ENSRNOG00000017911	Tcaf1	TRPM8 channel-associated factor 1 [Source:RGD Symbol;Acc:1565474]
-1.70459	6.54257	-6.68486	5.48623e-06	0.000108172	3.87126	ENSRNOG00000007931	Gucy2d	guanylate cyclase 2D, retinal [Source:RGD Symbol;Acc:620438]
0.789018	7.44526	6.68287	5.50577e-06	0.000108358	3.78731	ENSRNOG00000020384	Fam13b	family with sequence similarity 13, member B [Source:RGD Symbol;Acc:1310484]
0.604407	4.39778	6.68177	5.51659e-06	0.000108372	3.99207	ENSRNOG00000003704	Fam184b	family with sequence similarity 184, member B [Source:RGD Symbol;Acc:1564950]
-3.38654	6.50382	-6.67986	5.53545e-06	0.000108543	3.98682	ENSRNOG00000033262	Reep6	receptor accessory protein 6 [Source:RGD Symbol;Acc:1309508]
0.627953	5.17391	6.66795	5.65444e-06	0.000110473	3.88095	ENSRNOG00000026705	Dgki	diacylglycerol kinase, iota [Source:RGD Symbol;Acc:735049]
0.521979	5.95453	6.66813	5.65258e-06	0.000110473	3.80993	ENSRNOG00000001833	Mcm4	minichromosome maintenance complex component 4 [Source:RGD Symbol;Acc:3060]
1.04731	5.46536	6.66388	5.69565e-06	0.000111076	3.82261	ENSRNOG00000023533	Dipk1a	divergent protein kinase domain 1A [Source:RGD Symbol;Acc:1308581]
-0.540226	5.37918	-6.66175	5.7174e-06	0.000111297	3.87599	ENSRNOG00000016472	Marchf4	membrane associated ring-CH-type finger 4 [Source:RGD Symbol;Acc:1590797]
0.523125	6.56968	6.65807	5.75516e-06	0.000111829	3.75573	ENSRNOG00000005905	Pde4b	phosphodiesterase 4B [Source:RGD Symbol;Acc:3280]
1.46629	4.27721	6.65596	5.7769e-06	0.000112049	3.97295	ENSRNOG00000014658	Zfp423	zinc finger protein 423 [Source:RGD Symbol;Acc:621664]
1.45288	4.43291	6.65158	5.8224e-06	0.000112728	3.89096	ENSRNOG00000018831	Klk5	kallikrein related-peptidase 5 [Source:RGD Symbol;Acc:1593461]
-0.772052	6.40187	-6.64894	5.84994e-06	0.000113057	3.767	ENSRNOG00000036664	Narf	nuclear prelamin A recognition factor [Source:RGD Symbol;Acc:1310894]
0.865062	4.36754	6.64393	5.90263e-06	0.00011387	3.95016	ENSRNOG00000014143	Col24a1	collagen type XXIV alpha 1 chain [Source:RGD Symbol;Acc:1565539]
-1.44859	4.00484	-6.64278	5.91479e-06	0.000113899	4.07559	ENSRNOG00000013690	Clba1	clathrin binding box of aftiphilin containing 1 [Source:RGD Symbol;Acc:1307315]
-1.23375	5.40335	-6.6411	5.93266e-06	0.000114039	3.87366	ENSRNOG00000000477	Daxx	death-domain associated protein [Source:RGD Symbol;Acc:621227]
-1.3248	7.3448	-6.63152	6.03529e-06	0.000115804	3.70739	ENSRNOG00000042658	Nxnl1	nucleoredoxin-like 1 [Source:RGD Symbol;Acc:1308296]
2.6232	1.82431	6.62732	6.08095e-06	0.000116472	3.95249	ENSRNOG00000010208	Timp1	TIMP metallopeptidase inhibitor 1 [Source:RGD Symbol;Acc:621675]
0.544517	7.6638	6.62383	6.11902e-06	0.000116992	3.67934	ENSRNOG00000005796	Ctnna1	catenin alpha 1 [Source:RGD Symbol;Acc:1359485]
0.973611	4.52717	6.62078	6.15262e-06	0.000117425	3.8718	ENSRNOG00000029614	Robo1	roundabout guidance receptor 1 [Source:RGD Symbol;Acc:61941]
2.83894	1.29983	6.60994	6.2735e-06	0.000119314	3.7275	ENSRNOG00000048222	Nlrc5	NLR family, CARD domain containing 5 [Source:RGD Symbol;Acc:1309166]
1.30082	2.8381	6.60946	6.2789e-06	0.000119314	4.04286	ENSRNOG00000056455	LOC120097580	small nucleolar RNA SNORA16B/SNORA16A family [Source:RGD Symbol;Acc:41169148]
0.715995	4.74201	6.60892	6.28494e-06	0.000119314	3.82691	ENSRNOG00000043513	Cyp4x1	cytochrome P450, family 4, subfamily x, polypeptide 1 [Source:RGD Symbol;Acc:628719]
-0.614704	4.03189	-6.60549	6.32376e-06	0.000119627	3.94365	ENSRNOG00000042580	Zfp866	zinc finger protein 866 [Source:RGD Symbol;Acc:2318899]
-3.296	1.87693	-6.60578	6.32054e-06	0.000119627	3.26629	ENSRNOG00000053811	Arg2	arginase 2 [Source:RGD Symbol;Acc:2151]
0.658211	4.68241	6.59959	6.39118e-06	0.00012069	3.81811	ENSRNOG00000015054	Rcbtb2	RCC1 and BTB domain containing protein 2 [Source:RGD Symbol;Acc:735048]
-2.21487	1.61511	-6.59352	6.46119e-06	0.000121797	3.82154	ENSRNOG00000032596	RT1-T24-3	RT1 class I, locus T24, gene 3 [Source:RGD Symbol;Acc:1624211]
1.0058	2.39226	6.59227	6.47576e-06	0.000121858	4.10328	ENSRNOG00000005519	Grm3	glutamate metabotropic receptor 3 [Source:RGD Symbol;Acc:2744]
-0.743316	5.36024	-6.58666	6.54137e-06	0.000122877	3.74302	ENSRNOG00000007407	Ndufa12	NADH:ubiquinone oxidoreductase subunit A12 [Source:RGD Symbol;Acc:1311462]
0.901548	3.78201	6.58324	6.58175e-06	0.000123419	3.90957	ENSRNOG00000011720	L3mbtl3	L3MBTL histone methyl-lysine binding protein 3 [Source:RGD Symbol;Acc:1305474]
1.00993	6.57398	6.57971	6.62367e-06	0.000123989	3.60393	ENSRNOG00000058057	AABR07019403.1	UDP-glucose glycoprotein glucosyltransferase 2 [Source:RGD Symbol;Acc:1563520]
0.70845	4.52189	6.57569	6.6717e-06	0.00012467	3.79309	ENSRNOG00000002035	Paqr3	progestin and adipoQ receptor family member 3 [Source:RGD Symbol;Acc:1310426]
-1.62549	3.66384	-6.56713	6.77531e-06	0.000126386	4.00651	ENSRNOG00000004980	Rangrf	RAN guanine nucleotide release factor [Source:RGD Symbol;Acc:1563195]
-0.393383	9.11737	-6.56213	6.83664e-06	0.000126829	3.58316	ENSRNOG00000006336	Fyco1	FYVE and coiled-coil domain autophagy adaptor 1 [Source:RGD Symbol;Acc:1309069]
-0.464859	6.9179	-6.56306	6.82519e-06	0.000126829	3.57928	ENSRNOG00000062295	Gm9918	predicted gene 9918 [Source:RGD Symbol;Acc:15014772]
-0.549618	7.15933	-6.56134	6.84634e-06	0.000126829	3.57072	ENSRNOG00000016172	Ric1	RIC1 homolog, RAB6A GEF complex partner 1 [Source:RGD Symbol;Acc:1310016]
-2.19923	5.04362	-6.56367	6.81776e-06	0.000126829	3.82034	ENSRNOG00000019873	B3gat3	beta-1,3-glucuronyltransferase 3 [Source:RGD Symbol;Acc:1311968]
0.624291	4.4024	6.55883	6.87736e-06	0.000127184	3.79059	ENSRNOG00000013535	Cdh6	cadherin 6 [Source:RGD Symbol;Acc:2322]
-2.11449	6.69067	-6.55102	6.97487e-06	0.000128765	3.64914	ENSRNOG00000054770	Rdh11	retinol dehydrogenase 11 [Source:RGD Symbol;Acc:1312001]
-0.672608	5.65759	-6.54791	7.01419e-06	0.000129268	3.64342	ENSRNOG00000017608	C2cd3	C2 domain containing 3 centriole elongation regulator [Source:RGD Symbol;Acc:1307366]
0.700731	6.45421	6.54548	7.04492e-06	0.000129612	3.54566	ENSRNOG00000010146	Ndn	necdin, MAGE family member [Source:RGD Symbol;Acc:1310526]
1.36164	5.72404	6.54436	7.05918e-06	0.000129652	3.57808	ENSRNOG00000009997	Erap1	endoplasmic reticulum aminopeptidase 1 [Source:RGD Symbol;Acc:708542]
-1.1233	2.45423	-6.54286	7.07833e-06	0.000129781	4.0372	ENSRNOG00000018631	Enkur	enkurin, TRPC channel interacting protein [Source:RGD Symbol;Acc:1309839]
-1.16805	7.72123	-6.5415	7.0957e-06	0.000129878	3.53457	ENSRNOG00000057706	Kdm5c	lysine demethylase 5C [Source:RGD Symbol;Acc:1560601]
0.575789	4.83153	6.53735	7.14899e-06	0.000130187	3.67557	ENSRNOG00000001204	Ankrd13a	ankyrin repeat domain 13a [Source:RGD Symbol;Acc:1308577]
-1.082	3.13474	-6.53808	7.13957e-06	0.000130187	3.96642	ENSRNOG00000022509	NA	NA
-2.23641	6.69181	-6.53782	7.14298e-06	0.000130187	3.61416	ENSRNOG00000043215	Rtbdn	retbindin [Source:RGD Symbol;Acc:1308534]
-1.14707	11.6864	-6.53467	7.18377e-06	0.000130599	3.59927	ENSRNOG00000018185	Sag	S-antigen visual arrestin [Source:RGD Symbol;Acc:3619]
-2.6682	3.02038	-6.52459	7.31568e-06	0.000132772	3.96094	ENSRNOG00000027911	Stkld1	serine/threonine kinase-like domain containing 1 [Source:RGD Symbol;Acc:1307355]
-0.484293	9.48909	-6.51733	7.41226e-06	0.000134297	3.50741	ENSRNOG00000058249	Pgk1	phosphoglycerate kinase 1 [Source:RGD Symbol;Acc:619878]
1.78484	1.4946	6.50931	7.52049e-06	0.000135344	3.84442	ENSRNOG00000003357	Col3a1	collagen type III alpha 1 chain [Source:RGD Symbol;Acc:71029]
-0.661958	4.47174	-6.50973	7.51487e-06	0.000135344	3.72069	ENSRNOG00000012020	Nsun4	NOP2/Sun RNA methyltransferase 4 [Source:RGD Symbol;Acc:1559652]
-1.41651	4.82806	-6.5099	7.51251e-06	0.000135344	3.73602	ENSRNOG00000001681	Vps26c	VPS26 endosomal protein sorting factor C [Source:RGD Symbol;Acc:1306879]
-2.2962	2.6377	-6.50994	7.51204e-06	0.000135344	3.97988	ENSRNOG00000019100	Kif2c	kinesin family member 2C [Source:RGD Symbol;Acc:620239]
1.187	2.12038	6.50087	7.63634e-06	0.000137198	3.96311	ENSRNOG00000001807	Sspn	sarcospan [Source:RGD Symbol;Acc:1559723]
-1.51042	5.12606	-6.49546	7.71145e-06	0.000138316	3.64785	ENSRNOG00000010952	Ift122	intraflagellar transport 122 [Source:RGD Symbol;Acc:1311302]
1.53134	4.94816	6.49446	7.72546e-06	0.000138336	3.57998	ENSRNOG00000005215	Klhl4	kelch-like family member 4 [Source:RGD Symbol;Acc:1565441]
0.671294	6.2557	6.49033	7.78336e-06	0.000139141	3.45399	ENSRNOG00000060599	Gabrb3	gamma-aminobutyric acid type A receptor subunit beta 3 [Source:RGD Symbol;Acc:2651]
0.722306	7.49135	6.48849	7.80945e-06	0.000139375	3.42788	ENSRNOG00000033119	Plcb4	phospholipase C, beta 4 [Source:RGD Symbol;Acc:3345]
-1.32509	3.67958	-6.48683	7.83287e-06	0.00013956	3.84813	ENSRNOG00000002575	Sap30l	SAP30-like [Source:RGD Symbol;Acc:1309585]
0.639227	5.05073	6.48121	7.91314e-06	0.000140291	3.56073	ENSRNOG00000036960	Abcc9	ATP binding cassette subfamily C member 9 [Source:RGD Symbol;Acc:3787]
-0.891432	6.06085	-6.48286	7.88953e-06	0.000140291	3.49507	ENSRNOG00000018518	Prr14	proline rich 14 [Source:RGD Symbol;Acc:1594592]
-1.37061	5.60732	-6.482	7.90172e-06	0.000140291	3.56862	ENSRNOG00000031208	NA	NA
-0.458963	6.49925	-6.47882	7.94741e-06	0.000140667	3.44259	ENSRNOG00000047628	Khsrp	KH-type splicing regulatory protein [Source:RGD Symbol;Acc:621828]
-0.714406	3.44305	-6.47686	7.9757e-06	0.000140935	3.80566	ENSRNOG00000052869	Pierce2	piercer of microtubule wall 2 [Source:RGD Symbol;Acc:1594626]
-0.885179	3.96803	-6.47093	8.06202e-06	0.000141994	3.72123	ENSRNOG00000021493	Prdm9	PR/SET domain 9 [Source:RGD Symbol;Acc:1305247]
-0.886883	3.62346	-6.47092	8.06212e-06	0.000141994	3.78834	ENSRNOG00000022155	C4h3orf20	similar to human chromosome 3 open reading frame 20 [Source:RGD Symbol;Acc:1560289]
1.68079	3.66739	6.45967	8.22836e-06	0.000144447	3.69465	ENSRNOG00000038574	Rassf9	Ras association domain family member 9 [Source:RGD Symbol;Acc:621329]
0.747442	6.25694	6.46033	8.21852e-06	0.000144447	3.39871	ENSRNOG00000042690	Zmat4	zinc finger, matrin type 4 [Source:RGD Symbol;Acc:1584398]
0.814295	6.06894	6.44727	8.41582e-06	0.000147497	3.3829	ENSRNOG00000004624	Rnd3	Rho family GTPase 3 [Source:RGD Symbol;Acc:1359690]
-0.761765	4.4599	-6.44368	8.47096e-06	0.000148221	3.58536	ENSRNOG00000010888	Ankrd33b	ankyrin repeat domain 33B [Source:RGD Symbol;Acc:1564227]
0.758009	3.15302	6.44264	8.487e-06	0.00014826	3.75116	ENSRNOG00000012473	Cflar	CASP8 and FADD-like apoptosis regulator [Source:RGD Symbol;Acc:620847]
0.820416	2.93635	6.44068	8.51729e-06	0.000148547	3.75104	ENSRNOG00000012759	Col19a1	collagen type XIX alpha 1 chain [Source:RGD Symbol;Acc:1308920]
-0.566657	8.71999	-6.43849	8.55129e-06	0.000148898	3.34767	ENSRNOG00000018569	Ahcyl1	adenosylhomocysteinase-like 1 [Source:RGD Symbol;Acc:1309768]
0.856032	5.59795	6.43719	8.57141e-06	0.000149006	3.42182	ENSRNOG00000014524	S1pr3	sphingosine-1-phosphate receptor 3 [Source:RGD Symbol;Acc:1583843]
0.456436	5.77432	6.43026	8.68013e-06	0.000150652	3.38441	ENSRNOG00000043103	Frrs1l	ferric-chelate reductase 1-like [Source:RGD Symbol;Acc:1309978]
-3.07607	4.47626	-6.42598	8.74808e-06	0.000151586	3.79879	ENSRNOG00000031706	RGD1563601	similar to Tpi1 protein [Source:RGD Symbol;Acc:1563601]
-0.515448	6.56033	-6.42405	8.77885e-06	0.000151874	3.33689	ENSRNOG00000015913	Tspan5	tetraspanin 5 [Source:RGD Symbol;Acc:1303176]
0.868276	3.01404	6.41524	8.92082e-06	0.000153812	3.72212	ENSRNOG00000056894	St6galnac3	ST6 N-acetylgalactosaminide alpha-2,6-sialyltransferase 3 [Source:RGD Symbol;Acc:3677]
0.624518	5.06605	6.41488	8.92666e-06	0.000153812	3.42706	ENSRNOG00000016874	Zfp521	zinc finger protein 521 [Source:RGD Symbol;Acc:1307345]
0.499137	6.36409	6.41444	8.93388e-06	0.000153812	3.31111	ENSRNOG00000012045	Adgrb3	adhesion G protein-coupled receptor B3 [Source:RGD Symbol;Acc:1309703]
-1.25339	8.81684	-6.41333	8.95196e-06	0.000153876	3.30345	ENSRNOG00000010348	Cacna1f	calcium voltage-gated channel subunit alpha1 F [Source:RGD Symbol;Acc:621535]
-1.16024	6.94291	-6.40851	9.03088e-06	0.000154984	3.30999	ENSRNOG00000008961	Mapre3	microtubule-associated protein, RP/EB family, member 3 [Source:RGD Symbol;Acc:1359297]
1.49788	4.49514	6.40021	9.1685e-06	0.000156985	3.51652	ENSRNOG00000017307	Prss23	serine protease 23 [Source:RGD Symbol;Acc:1359545]
0.746111	3.85124	6.39972	9.17674e-06	0.000156985	3.56514	ENSRNOG00000015461	Serpine2	serpin family E member 2 [Source:RGD Symbol;Acc:3748]
0.901712	5.5939	6.39604	9.23858e-06	0.000157736	3.32291	ENSRNOG00000061073	Zfp275	zinc finger protein 275 [Source:RGD Symbol;Acc:1564630]
0.63841	3.70943	6.39452	9.2643e-06	0.000157736	3.58425	ENSRNOG00000048978	Nphp3	nephrocystin 3 [Source:RGD Symbol;Acc:1563856]
-0.510433	6.0547	-6.39188	9.30889e-06	0.000157736	3.3057	ENSRNOG00000020658	Aarsd1	alanyl-tRNA synthetase domain containing 1 [Source:RGD Symbol;Acc:1561650]
-1.41118	5.28371	-6.39296	9.29065e-06	0.000157736	3.44507	ENSRNOG00000018233	Gas6	growth arrest specific 6 [Source:RGD Symbol;Acc:61913]
-1.4115	3.86529	-6.39408	9.27174e-06	0.000157736	3.63115	ENSRNOG00000022623	Ttll12	tubulin tyrosine ligase like 12 [Source:RGD Symbol;Acc:1305319]
-1.52851	3.5185	-6.39242	9.29984e-06	0.000157736	3.71924	ENSRNOG00000009902	Lrrc46	leucine rich repeat containing 46 [Source:RGD Symbol;Acc:1303311]
0.578053	7.47604	6.38916	9.35525e-06	0.000158272	3.2423	ENSRNOG00000006490	Neo1	neogenin 1 [Source:RGD Symbol;Acc:619837]
0.746209	4.85809	6.38405	9.44292e-06	0.000159253	3.38766	ENSRNOG00000004111	Soat1	sterol O-acyltransferase 1 [Source:RGD Symbol;Acc:621641]
-0.3845	7.42646	-6.38443	9.43642e-06	0.000159253	3.23722	ENSRNOG00000013729	RGD1306271	similar to KIAA1549 protein [Source:RGD Symbol;Acc:1306271]
-1.57419	4.90955	-6.38223	9.47438e-06	0.000159532	3.48039	ENSRNOG00000061097	Lrit3	leucine-rich repeat, Ig-like and transmembrane domains 3 [Source:RGD Symbol;Acc:1559637]
1.29235	3.23094	6.38077	9.4997e-06	0.000159599	3.6134	ENSRNOG00000023549	Samd5	sterile alpha motif domain containing 5 [Source:RGD Symbol;Acc:1311012]
-0.643654	6.82287	-6.38029	9.5081e-06	0.000159599	3.24809	ENSRNOG00000005218	Sf3a1	splicing factor 3A subunit 1 [Source:RGD Symbol;Acc:1311477]
-1.82638	3.38004	-6.37389	9.61987e-06	0.000161223	3.73358	ENSRNOG00000027480	Tmem116	transmembrane protein 116 [Source:RGD Symbol;Acc:1596066]
-0.851686	6.44198	-6.36543	9.76967e-06	0.000163478	3.24614	ENSRNOG00000005724	Map3k7	mitogen activated protein kinase kinase kinase 7 [Source:RGD Symbol;Acc:1309438]
-0.510647	5.19837	-6.35521	9.95407e-06	0.000166064	3.31512	ENSRNOG00000047053	Thyn1	thymocyte nuclear protein 1 [Source:RGD Symbol;Acc:1359525]
-2.76994	0.771871	-6.35515	9.95518e-06	0.000166064	2.40777	ENSRNOG00000048264	H4f3	H1.3 linker histone, cluster member [Source:RGD Symbol;Acc:1585568]
-0.416657	6.52463	-6.35399	9.97631e-06	0.000166158	3.2042	ENSRNOG00000001629	Get1	guided entry of tail-anchored proteins factor 1 [Source:RGD Symbol;Acc:735104]
1.50374	3.80681	6.35193	1.0014e-05	0.000166269	3.4749	ENSRNOG00000052287	Bsph1	binder of sperm protein homolog 1 [Source:RGD Symbol;Acc:1594649]
1.46748	4.5632	6.35251	1.00034e-05	0.000166269	3.43576	ENSRNOG00000008465	Tmem176b	transmembrane protein 176B [Source:RGD Symbol;Acc:708403]
1.00504	8.7632	6.35056	1.00393e-05	0.000166431	3.1836	ENSRNOG00000023148	Col11a1	collagen type XI alpha 1 chain [Source:RGD Symbol;Acc:2372]
1.48357	2.56553	6.34292	1.01806e-05	0.000167481	3.65921	ENSRNOG00000049674	NA	NA
0.706007	5.74143	6.34429	1.01551e-05	0.000167481	3.21579	ENSRNOG00000010131	Rin2	Ras and Rab interactor 2 [Source:RGD Symbol;Acc:1305873]
-0.632774	5.73711	-6.34319	1.01755e-05	0.000167481	3.24812	ENSRNOG00000052814	Ankrd27	ankyrin repeat domain 27 [Source:RGD Symbol;Acc:1307106]
-1.90335	3.73417	-6.34517	1.01387e-05	0.000167481	3.61316	ENSRNOG00000008553	Mthfr	methylenetetrahydrofolate reductase [Source:RGD Symbol;Acc:1309952]
-2.53607	3.80161	-6.34358	1.01683e-05	0.000167481	3.62953	ENSRNOG00000000857	Msh5	mutS homolog 5 [Source:RGD Symbol;Acc:1303008]
0.899877	7.48325	6.32272	1.05646e-05	0.000173531	3.11709	ENSRNOG00000013481	Cdh11	cadherin 11 [Source:RGD Symbol;Acc:619742]
0.646443	4.66399	6.31038	1.08066e-05	0.000177235	3.28163	ENSRNOG00000001608	Nxpe3	neurexophilin and PC-esterase domain family, member 3 [Source:RGD Symbol;Acc:1584648]
0.856732	6.17676	6.30627	1.08883e-05	0.000178303	3.11039	ENSRNOG00000025372	Glce	glucuronic acid epimerase [Source:RGD Symbol;Acc:1565253]
1.3605	3.94466	6.30495	1.09149e-05	0.000178465	3.36394	ENSRNOG00000024365	Ect2	epithelial cell transforming 2 [Source:RGD Symbol;Acc:1308524]
0.634485	3.54041	6.29981	1.10184e-05	0.000179884	3.43528	ENSRNOG00000059322	N4bp2l1	NEDD4 binding protein 2-like 1 [Source:RGD Symbol;Acc:1595713]
0.918205	3.4752	6.2949	1.11182e-05	0.000181237	3.44881	ENSRNOG00000058111	Itga2	integrin subunit alpha 2 [Source:RGD Symbol;Acc:621632]
0.974566	5.75198	6.28898	1.124e-05	0.000182945	3.10299	ENSRNOG00000013202	Akap7	A-kinase anchoring protein 7 [Source:RGD Symbol;Acc:1303071]
-1.12371	4.52378	-6.28779	1.12645e-05	0.000183066	3.32265	ENSRNOG00000011332	Clspn	claspin [Source:RGD Symbol;Acc:1309083]
-2.57015	2.34868	-6.28626	1.12964e-05	0.000183306	3.4779	ENSRNOG00000015641	Exoc3l1	exocyst complex component 3-like 1 [Source:RGD Symbol;Acc:1311132]
1.01596	3.85151	6.28419	1.13393e-05	0.000183725	3.37411	ENSRNOG00000006472	Hspa2	heat shock protein family A (Hsp70) member 2 [Source:RGD Symbol;Acc:620664]
0.79769	5.97078	6.28115	1.14031e-05	0.000183924	3.07823	ENSRNOG00000019319	Fchsd2	FCH and double SH3 domains 2 [Source:RGD Symbol;Acc:1304812]
-1.09571	3.71469	-6.28115	1.1403e-05	0.000183924	3.45927	ENSRNOG00000000818	Ppp1r18	protein phosphatase 1, regulatory subunit 18 [Source:RGD Symbol;Acc:1309543]
-1.29426	6.26536	-6.28224	1.13803e-05	0.000183924	3.13036	ENSRNOG00000005096	Bzw2	basic leucine zipper and W2 domains 2 [Source:RGD Symbol;Acc:621507]
0.497353	6.4433	6.2783	1.1463e-05	0.000184613	3.05442	ENSRNOG00000007610	Gdf11	growth differentiation factor 11 [Source:RGD Symbol;Acc:2673]
0.920059	5.9496	6.27608	1.15099e-05	0.00018509	3.06523	ENSRNOG00000007359	Gca	grancalcin [Source:RGD Symbol;Acc:1306589]
0.932656	4.59507	6.27022	1.16348e-05	0.000186819	3.21263	ENSRNOG00000023851	Igsf3	immunoglobulin superfamily, member 3 [Source:RGD Symbol;Acc:1307796]
0.617935	5.71415	6.26604	1.17246e-05	0.000187979	3.07131	ENSRNOG00000001958	Ift57	intraflagellar transport 57 [Source:RGD Symbol;Acc:1305947]
-0.668478	7.01519	-6.26074	1.18396e-05	0.00018954	3.01073	ENSRNOG00000018680	Rpl17	ribosomal protein L17 [Source:RGD Symbol;Acc:1303019]
-0.712535	5.85225	-6.25478	1.19705e-05	0.00019135	3.07777	ENSRNOG00000000524	RGD735065	similar to GI:13385412-like protein splice form I [Source:RGD Symbol;Acc:735065]
1.52078	1.80572	6.24645	1.21557e-05	0.000194022	3.50483	ENSRNOG00000025641	Gml	glycosylphosphatidylinositol anchored molecule like [Source:RGD Symbol;Acc:1307850]
1.22228	2.55981	6.24285	1.22369e-05	0.000195026	3.46161	ENSRNOG00000004869	Dach2	dachshund family transcription factor 2 [Source:RGD Symbol;Acc:1561687]
0.460766	6.19134	6.2398	1.23058e-05	0.000195834	2.98998	ENSRNOG00000051837	Nwd2	NACHT and WD repeat domain containing 2 [Source:RGD Symbol;Acc:1563065]
1.2684	5.69946	6.23696	1.23706e-05	0.000196283	3.00396	ENSRNOG00000030183	Plod2	procollagen lysine, 2-oxoglutarate 5-dioxygenase 2 [Source:RGD Symbol;Acc:3353]
-0.963164	7.85251	-6.23745	1.23594e-05	0.000196283	2.96286	ENSRNOG00000008218	Atp6v0e2	ATPase, H+ transporting V0 subunit e2 [Source:RGD Symbol;Acc:1303238]
2.94613	2.52517	6.23449	1.2427e-05	0.000196831	3.48724	ENSRNOG00000015498	Il17rb	interleukin 17 receptor B [Source:RGD Symbol;Acc:1311392]
0.750418	4.37431	6.23385	1.24419e-05	0.000196831	3.18128	ENSRNOG00000018662	Amacr	alpha-methylacyl-CoA racemase [Source:RGD Symbol;Acc:3048]
-0.871	4.65802	-6.23099	1.25077e-05	0.000197581	3.18553	ENSRNOG00000010386	H2ax	H2A.X variant histone [Source:RGD Symbol;Acc:1566119]
0.428402	6.10078	6.23015	1.25271e-05	0.000197597	2.98188	ENSRNOG00000018839	Ntrk2	neurotrophic receptor tyrosine kinase 2 [Source:RGD Symbol;Acc:3213]
0.720362	5.37285	6.22646	1.26127e-05	0.000197852	3.02356	ENSRNOG00000052572	Aff2	ALF transcription elongation factor 2 [Source:RGD Symbol;Acc:1565592]
0.636873	6.45314	6.22815	1.25733e-05	0.000197852	2.95124	ENSRNOG00000014678	Fzd5	frizzled class receptor 5 [Source:RGD Symbol;Acc:631406]
-1.63137	6.48675	-6.22691	1.26023e-05	0.000197852	3.01343	ENSRNOG00000013890	Crx	cone-rod homeobox [Source:RGD Symbol;Acc:620511]
-2.65779	3.60066	-6.22628	1.26171e-05	0.000197852	3.48049	ENSRNOG00000013631	Slc31a2	solute carrier family 31 member 2 [Source:RGD Symbol;Acc:1307963]
-0.914107	4.12943	-6.22249	1.27056e-05	0.000198833	3.24897	ENSRNOG00000051529	Opn1mw	opsin 1, medium wave sensitive [Source:RGD Symbol;Acc:620978]
-1.55272	4.03084	-6.22202	1.27167e-05	0.000198833	3.32595	ENSRNOG00000050742	Dnmbp	dynamin binding protein [Source:RGD Symbol;Acc:1583840]
1.34852	3.57177	6.21939	1.27787e-05	0.000199394	3.28918	ENSRNOG00000012988	Lix1	limb and CNS expressed 1 [Source:RGD Symbol;Acc:1309454]
-2.11956	6.19873	-6.21892	1.27898e-05	0.000199394	3.08624	ENSRNOG00000048226	Hmgn1	high mobility group nucleosome binding domain 1 [Source:RGD Symbol;Acc:1307761]
-1.42965	7.68424	-6.21699	1.28354e-05	0.000199815	2.93155	ENSRNOG00000003800	Rgs9	regulator of G-protein signaling 9 [Source:RGD Symbol;Acc:3572]
0.690103	5.30471	6.21181	1.29589e-05	0.000201445	3.00469	ENSRNOG00000011313	Sorcs1	sortilin-related VPS10 domain containing receptor 1 [Source:RGD Symbol;Acc:1305910]
0.958705	4.60965	6.20986	1.30058e-05	0.000201602	3.08956	ENSRNOG00000009531	Col9a3	collagen type IX alpha 3 chain [Source:RGD Symbol;Acc:1310255]
0.856815	5.50933	6.20945	1.30157e-05	0.000201602	2.98299	ENSRNOG00000001645	Filip1l	filamin A interacting protein 1-like [Source:RGD Symbol;Acc:1565927]
0.828498	4.83171	6.20905	1.30254e-05	0.000201602	3.04953	ENSRNOG00000017258	Ica1l	islet cell autoantigen 1-like [Source:RGD Symbol;Acc:735110]
-0.449928	6.65827	-6.20642	1.3089e-05	0.000202294	2.92011	ENSRNOG00000011732	Psmb7	proteasome 20S subunit beta 7 [Source:RGD Symbol;Acc:621093]
0.563942	4.93712	6.20196	1.31973e-05	0.000203676	3.05368	ENSRNOG00000011517	Tnfrsf21	TNF receptor superfamily member 21 [Source:RGD Symbol;Acc:1307308]
2.95519	4.47766	6.19711	1.33163e-05	0.000204922	3.20908	ENSRNOG00000046834	C3	complement C3 [Source:RGD Symbol;Acc:2232]
-0.482919	9.93862	-6.19759	1.33044e-05	0.000204922	2.91717	ENSRNOG00000002840	Atp5f1b	ATP synthase F1 subunit beta [Source:RGD Symbol;Acc:621368]
-0.637772	7.40014	-6.18985	1.34966e-05	0.000207399	2.87303	ENSRNOG00000014635	Clta	clathrin, light chain A [Source:RGD Symbol;Acc:70919]
1.12465	5.1118	6.18619	1.35885e-05	0.000208462	2.99716	ENSRNOG00000042224	Cyp2j10	cytochrome P450, family 2, subfamily j, polypeptide 10 [Source:RGD Symbol;Acc:1563215]
0.910371	6.80716	6.18478	1.36241e-05	0.000208462	2.85843	ENSRNOG00000033531	Cacna2d1	calcium voltage-gated channel auxiliary subunit alpha2delta 1 [Source:RGD Symbol;Acc:2247]
0.81226	4.91156	6.1849	1.36211e-05	0.000208462	3.00551	ENSRNOG00000042478	Adam22	ADAM metallopeptidase domain 22 [Source:RGD Symbol;Acc:1585016]
0.634596	4.13894	6.18164	1.37034e-05	0.000209378	3.12782	ENSRNOG00000007636	Cadps2	calcium dependent secretion activator 2 [Source:RGD Symbol;Acc:1559440]
2.55412	1.15521	6.17625	1.3841e-05	0.000211178	3.29848	ENSRNOG00000010806	Npvf	neuropeptide VF precursor [Source:RGD Symbol;Acc:61815]
0.649945	6.14758	6.17449	1.38863e-05	0.000211569	2.86605	ENSRNOG00000052725	Shisal1	shisa like 1 [Source:RGD Symbol;Acc:1566029]
-0.710168	5.31904	-6.16805	1.40533e-05	0.00021381	2.9696	ENSRNOG00000060994	NA	NA
1.40206	5.78118	6.16337	1.41757e-05	0.000215062	2.86336	ENSRNOG00000059016	Tspan12	tetraspanin 12 [Source:RGD Symbol;Acc:1311102]
1.00125	4.7815	6.16346	1.41735e-05	0.000215062	2.95855	ENSRNOG00000004378	Abca5	ATP binding cassette subfamily A member 5 [Source:RGD Symbol;Acc:628661]
2.4401	1.31664	6.15763	1.43277e-05	0.00021645	3.15815	ENSRNOG00000033697	Casp4	caspase 4 [Source:RGD Symbol;Acc:621757]
0.651905	9.55628	6.15891	1.42936e-05	0.00021645	2.83494	ENSRNOG00000016271	Itm2b	integral membrane protein 2B [Source:RGD Symbol;Acc:620727]
0.437606	9.8531	6.15771	1.43255e-05	0.00021645	2.83695	ENSRNOG00000046005	Scd2	stearoyl-Coenzyme A desaturase 2 [Source:RGD Symbol;Acc:621177]
1.15297	6.28697	6.15226	1.44713e-05	0.0002183	2.80979	ENSRNOG00000003350	Mospd2	motile sperm domain containing 2 [Source:RGD Symbol;Acc:1563952]
-1.12283	6.60606	-6.15153	1.44909e-05	0.0002183	2.84597	ENSRNOG00000012546	Frmpd1	FERM and PDZ domain containing 1 [Source:RGD Symbol;Acc:1305229]
0.975172	7.85259	6.14385	1.46993e-05	0.000220511	2.78013	ENSRNOG00000011501	Atp1b3	ATPase Na+/K+ transporting subunit beta 3 [Source:RGD Symbol;Acc:2172]
-0.695173	6.52945	-6.14478	1.46739e-05	0.000220511	2.81711	ENSRNOG00000018992	Dpysl3	dihydropyrimidinase-like 3 [Source:RGD Symbol;Acc:2410]
[truncated: 10,012 more rows]

## Sheet: male only
logFC	AveExpr	t	P.Value	adj.P.Val	B	ENSEMBL	name	description
[truncated: 10,726 more rows]
