# Supplementary material for: Sex-specific attenuation of photoreceptor degeneration by reserpine in a rhodopsin P23H rat model of autosomal dominant retinitis pigmentosa
Source: eLife. 2025 Apr 15;14:RP103888. doi: 10.7554/eLife.103888 (PMC11999695; doi:10.7554/eLife.103888)
Supplement: Figure 6—source data 1. — Comparisons of untreated and reserpine treated P23H retinas from female samples only, male samples only, and with both sexes combined. [file elife-103888-fig6-data1.xlsx]

## Sheet: Description
Figure 6–Source Data 1. Differential gene expression in P23H retinas after reserpine treatment.
Worksheets	Description
combined	Output of limma topTable comparisons of untreated and reserpine treated P23H retinas with both sexes combined
female only	Output of limma topTable comparisons of untreated and reserpine treated P23H retinas from female samples only
male only	Output of limma topTable comparisons of untreated and reserpine treated P23H retinas from male samples only

## Sheet: combined
logFC	AveExpr	t	P.Value	adj.P.Val	B	ENSEMBL	name	description
1.03929	2.99834	5.13315	0.000102961	0.676307	-2.90363	ENSRNOG00000005964	Nr4a3	nuclear receptor subfamily 4, group A, member 3 [Source:RGD Symbol;Acc:61882]
0.855981	3.18857	4.99481	0.00013575	0.676307	-2.68508	ENSRNOG00000001189	Sik1	salt-inducible kinase 1 [Source:RGD Symbol;Acc:69407]
0.475144	6.44198	4.68866	0.000252212	0.676307	-1.56611	ENSRNOG00000005724	Map3k7	mitogen activated protein kinase kinase kinase 7 [Source:RGD Symbol;Acc:1309438]
-0.618864	5.75635	-4.70326	0.000244816	0.676307	-1.63327	ENSRNOG00000010478	Serpina3n	serine (or cysteine) peptidase inhibitor, clade A, member 3N [Source:RGD Symbol;Acc:3747]
-0.380667	4.37101	-4.49059	0.000378468	0.81189	-2.49247	ENSRNOG00000050183	NA	NA
0.396585	5.65339	4.24238	0.000632436	0.920232	-2.0992	ENSRNOG00000006983	Nr2c1	nuclear receptor subfamily 2, group C, member 1 [Source:RGD Symbol;Acc:3200]
0.303542	6.18849	4.32448	0.000533362	0.920232	-1.85936	ENSRNOG00000004752	Nalcn	sodium leak channel, non-selective [Source:RGD Symbol;Acc:628710]
-0.562661	3.26757	-4.20304	0.000686356	0.920232	-2.60264	ENSRNOG00000031743	Gbp2	guanylate binding protein 2 [Source:RGD Symbol;Acc:621810]
-0.211256	6.73065	-4.1188	0.000818057	0.974943	-1.97441	ENSRNOG00000005003	Ptprn2	protein tyrosine phosphatase, receptor type N2 [Source:RGD Symbol;Acc:61904]
4.69217	-2.04744	1.39909	0.18104	0.999831	-4.59186	ENSRNOG00000016877	Shisa7	shisa family member 7 [Source:RGD Symbol;Acc:1583944]
3.66115	-0.932144	1.09396	0.290311	0.999831	-4.59357	ENSRNOG00000031475	Col16a1	collagen type XVI alpha 1 chain [Source:RGD Symbol;Acc:1310982]
3.53563	0.530485	1.25715	0.226898	0.999831	-4.59287	ENSRNOG00000004650	Begain	brain-enriched guanylate kinase-associated [Source:RGD Symbol;Acc:708347]
3.22899	0.830235	0.586323	0.565911	0.999831	-4.59821	ENSRNOG00000018285	Kcna2	potassium voltage-gated channel subfamily A member 2 [Source:RGD Symbol;Acc:2950]
3.06759	1.14253	1.41167	0.177366	0.999831	-4.58789	ENSRNOG00000026979	Matcap2	microtubule associated tyrosine carboxypeptidase 2 [Source:RGD Symbol;Acc:1561444]
3.00634	0.0676813	1.83938	0.0846573	0.999831	-4.58678	ENSRNOG00000021316	Tmem98	transmembrane protein 98 [Source:RGD Symbol;Acc:1359736]
2.96374	0.709954	2.44758	0.0264164	0.999831	-4.55622	ENSRNOG00000058243	Rfx8	regulatory factor X8 [Source:RGD Symbol;Acc:1560724]
2.95579	1.01369	1.62194	0.124525	0.999831	-4.58296	ENSRNOG00000033090	Ltbp1	latent transforming growth factor beta binding protein 1 [Source:RGD Symbol;Acc:68379]
2.89956	1.8172	0.470849	0.64416	0.999831	-4.59968	ENSRNOG00000017447	Eif2s2	eukaryotic translation initiation factor 2 subunit beta [Source:RGD Symbol;Acc:735192]
2.81072	0.306726	0.842116	0.412244	0.999831	-4.5963	ENSRNOG00000054782	Ppp3cb	protein phosphatase 3 catalytic subunit beta [Source:RGD Symbol;Acc:3383]
2.79977	4.09397	2.66926	0.0168902	0.999831	-4.33113	ENSRNOG00000019106	LOC100365810	40S ribosomal protein S17-like [Source:RGD Symbol;Acc:2318277]
2.79388	-0.642682	0.558298	0.584438	0.999831	-4.59835	ENSRNOG00000008523	Faf1	Fas associated factor 1 [Source:RGD Symbol;Acc:70987]
2.79179	1.73344	1.50099	0.153006	0.999831	-4.58482	ENSRNOG00000010877	Alg9	ALG9, alpha-1,2-mannosyltransferase [Source:RGD Symbol;Acc:1311272]
2.78018	-1.14807	0.633723	0.535296	0.999831	-4.59736	ENSRNOG00000002121	Lrrc8d	leucine rich repeat containing 8 VRAC subunit D [Source:RGD Symbol;Acc:1309601]
2.75379	1.50296	1.71888	0.105093	0.999831	-4.58161	ENSRNOG00000037430	Chfr	checkpoint with forkhead and ring finger domains [Source:RGD Symbol;Acc:1306360]
2.72286	0.57562	1.0803	0.296166	0.999831	-4.59454	ENSRNOG00000013594	Acp2	acid phosphatase 2, lysosomal [Source:RGD Symbol;Acc:2021]
2.65023	0.550239	0.778887	0.447514	0.999831	-4.59809	ENSRNOG00000012603	Sestd1	SEC14 and spectrin domain containing 1 [Source:RGD Symbol;Acc:1562244]
2.62752	0.364919	1.41681	0.175884	0.999831	-4.58976	ENSRNOG00000004200	Sybu	syntabulin [Source:RGD Symbol;Acc:1564335]
2.62671	1.13973	0.679394	0.506684	0.999831	-4.59738	ENSRNOG00000056907	Nipbl	NIPBL, cohesin loading factor [Source:RGD Symbol;Acc:1306393]
2.52282	0.770225	0.837131	0.414957	0.999831	-4.59668	ENSRNOG00000016217	Gtpbp4	GTP binding protein 4 [Source:RGD Symbol;Acc:620783]
2.51547	1.76777	1.62777	0.123275	0.999831	-4.58317	ENSRNOG00000015753	Epn1	Epsin 1 [Source:RGD Symbol;Acc:619772]
2.51396	0.775218	2.23919	0.0398393	0.999831	-4.57093	ENSRNOG00000018655	Adsl	adenylosuccinate lyase [Source:RGD Symbol;Acc:1307617]
2.49999	0.257846	2.12025	0.0501148	0.999831	-4.57761	ENSRNOG00000024905	Drc1	dynein regulatory complex subunit 1 [Source:RGD Symbol;Acc:1359318]
2.48578	1.73573	1.04003	0.313926	0.999831	-4.59433	ENSRNOG00000009318	Ttll5	tubulin tyrosine ligase like 5 [Source:RGD Symbol;Acc:1563583]
2.46125	1.39675	1.1044	0.285894	0.999831	-4.59254	ENSRNOG00000003835	Slc43a2	solute carrier family 43 member 2 [Source:RGD Symbol;Acc:1305819]
2.43807	1.16226	2.05789	0.0564278	0.999831	-4.56866	ENSRNOG00000009340	Zbtb6	zinc finger and BTB domain containing 6 [Source:RGD Symbol;Acc:1306007]
2.39133	3.08502	1.50427	0.152167	0.999831	-4.57856	ENSRNOG00000013603	Dffa	DNA fragmentation factor subunit alpha [Source:RGD Symbol;Acc:620334]
2.37134	1.56966	1.98006	0.0653219	0.999831	-4.57147	ENSRNOG00000048985	NA	NA
2.33071	1.63392	1.71784	0.105286	0.999831	-4.5819	ENSRNOG00000061424	Map3k3	mitogen activated protein kinase kinase kinase 3 [Source:RGD Symbol;Acc:1304575]
2.30974	0.93874	1.55774	0.139026	0.999831	-4.58408	ENSRNOG00000003590	Tom1l2	target of myb1 like 2 membrane trafficking protein [Source:RGD Symbol;Acc:1306728]
2.25324	0.682899	1.05804	0.30589	0.999831	-4.59474	ENSRNOG00000001849	Mapk1	mitogen activated protein kinase 1 [Source:RGD Symbol;Acc:70500]
2.24003	2.13465	3.07374	0.00732858	0.999831	-4.37248	ENSRNOG00000016910	Ralgps1	Ral GEF with PH domain and SH3 binding motif 1 [Source:RGD Symbol;Acc:2319500]
2.23505	2.55877	2.29146	0.035974	0.999831	-4.49996	ENSRNOG00000016680	Nsd1	nuclear receptor binding SET domain protein 1 [Source:RGD Symbol;Acc:1307748]
2.21686	0.76296	1.19122	0.251091	0.999831	-4.59215	ENSRNOG00000058545	Arhgap4	Rho GTPase activating protein 4 [Source:RGD Symbol;Acc:628901]
2.21235	0.753391	1.56423	0.137499	0.999831	-4.56489	ENSRNOG00000025979	Gramd2a	GRAM domain containing 2A [Source:RGD Symbol;Acc:1564007]
2.20173	-2.37427	0.730255	0.475885	0.999831	-4.59619	ENSRNOG00000002595	Dpp10	dipeptidyl peptidase like 10 [Source:RGD Symbol;Acc:1306427]
2.1769	2.17496	0.764466	0.455815	0.999831	-4.59974	ENSRNOG00000015030	Tjp2	tight junction protein 2 [Source:RGD Symbol;Acc:619807]
2.15002	0.0227087	1.74892	0.0996298	0.999831	-4.58422	ENSRNOG00000001215	Cfap410	cilia and flagella associated protein 410 [Source:RGD Symbol;Acc:1309594]
2.11257	2.32407	2.11243	0.0508687	0.999831	-4.49326	ENSRNOG00000012939	Abca7	ATP binding cassette subfamily A member 7 [Source:RGD Symbol;Acc:1303134]
2.08968	0.763713	0.808732	0.430636	0.999831	-4.5974	ENSRNOG00000019798	Stub1	STIP1 homology and U-box containing protein 1 [Source:RGD Symbol;Acc:1306167]
2.08803	0.122099	1.00143	0.331657	0.999831	-4.59532	ENSRNOG00000009177	Fcer1a	Fc epsilon receptor Ia [Source:RGD Symbol;Acc:2597]
2.06369	-0.499449	1.11267	0.282431	0.999831	-4.59338	ENSRNOG00000001368	Rph3a	rabphilin 3A [Source:RGD Symbol;Acc:620073]
2.04046	-1.13394	0.64816	0.526156	0.999831	-4.5971	ENSRNOG00000007838	Ddx47	DEAD-box helicase 47 [Source:RGD Symbol;Acc:1310437]
2.03871	-0.0165807	1.59507	0.13043	0.999831	-4.58731	ENSRNOG00000016665	Tpra1	transmembrane protein adipocyte associated 1 [Source:RGD Symbol;Acc:620858]
2.02562	-0.893592	1.05477	0.307336	0.999831	-4.59477	ENSRNOG00000020363	Med25	mediator complex subunit 25 [Source:RGD Symbol;Acc:1305137]
2.0228	0.637335	1.48393	0.15743	0.999831	-4.58637	ENSRNOG00000013162	Zcchc12	zinc finger CCHC-type containing 12 [Source:RGD Symbol;Acc:1359439]
1.99356	0.658661	2.07608	0.0545152	0.999831	-4.57558	ENSRNOG00000014684	Npr1	natriuretic peptide receptor 1 [Source:RGD Symbol;Acc:3195]
1.96878	0.784763	0.63048	0.537361	0.999831	-4.59771	ENSRNOG00000017671	Rasa3	RAS p21 protein activator 3 [Source:RGD Symbol;Acc:69365]
1.94014	0.997781	1.21934	0.240543	0.999831	-4.59182	ENSRNOG00000012561	Arhgef10	Rho guanine nucleotide exchange factor 10 [Source:RGD Symbol;Acc:1565043]
1.93949	1.35444	1.69476	0.109665	0.999831	-4.56506	ENSRNOG00000021164	Stip1	stress-induced phosphoprotein 1 [Source:RGD Symbol;Acc:621599]
1.92139	1.32934	1.6085	0.12745	0.999831	-4.58161	ENSRNOG00000013624	Uevld	UEV and lactate/malate dehyrogenase domains [Source:RGD Symbol;Acc:1587416]
1.87627	1.18599	1.71872	0.105122	0.999831	-4.53999	ENSRNOG00000026108	Tcof1	treacle ribosome biogenesis factor 1 [Source:RGD Symbol;Acc:1309850]
1.85904	-0.414305	0.835394	0.415905	0.999831	-4.59604	ENSRNOG00000007529	Bmf	Bcl2 modifying factor [Source:RGD Symbol;Acc:628658]
1.84024	0.691986	1.80665	0.0898283	0.999831	-4.54896	ENSRNOG00000008100	Rgs20	regulator of G-protein signaling 20 [Source:RGD Symbol;Acc:1586146]
1.80149	0.315016	0.995275	0.334547	0.999831	-4.59557	ENSRNOG00000058412	Morf4l1	mortality factor 4 like 1 [Source:RGD Symbol;Acc:1307938]
1.79771	-0.80755	0.353397	0.728445	0.999831	-4.59819	ENSRNOG00000012192	Znf740	zinc finger protein 740 [Source:RGD Symbol;Acc:1589052]
1.79262	3.45081	1.59147	0.131239	0.999831	-4.53588	ENSRNOG00000013506	Zfand6	zinc finger AN1-type containing 6 [Source:RGD Symbol;Acc:1359317]
1.78459	0.103642	1.22031	0.240183	0.999831	-4.59233	ENSRNOG00000009033	Cntn2	contactin 2 [Source:RGD Symbol;Acc:3821]
1.78054	1.39551	1.12573	0.277028	0.999831	-4.59182	ENSRNOG00000008256	Mrpl38	mitochondrial ribosomal protein L38 [Source:RGD Symbol;Acc:1311180]
1.76935	-0.537319	0.646361	0.52729	0.999831	-4.59699	ENSRNOG00000036691	Mcrip1	MAPK regulated co-repressor interacting protein 1 [Source:RGD Symbol;Acc:1311925]
1.76453	1.51061	1.40134	0.180378	0.999831	-4.58785	ENSRNOG00000013429	Tbl3	transducin (beta)-like 3 [Source:RGD Symbol;Acc:1305142]
1.75297	1.16963	1.26299	0.224847	0.999831	-4.58805	ENSRNOG00000029194	Dhx30	DExH-box helicase 30 [Source:RGD Symbol;Acc:1308888]
1.72086	-0.630879	1.32455	0.204093	0.999831	-4.59049	ENSRNOG00000025448	Limd2	LIM domain containing 2 [Source:RGD Symbol;Acc:1309967]
1.69078	0.178731	0.51792	0.611664	0.999831	-4.59885	ENSRNOG00000018412	Sfi1	SFI1 centrin binding protein [Source:RGD Symbol;Acc:1560636]
1.6366	1.29142	1.04176	0.313147	0.999831	-4.59397	ENSRNOG00000022870	Smad5	SMAD family member 5 [Source:RGD Symbol;Acc:620158]
1.61505	0.469975	1.63151	0.122479	0.999831	-4.58233	ENSRNOG00000015450	Ppp1r16a	protein phosphatase 1, regulatory subunit 16A [Source:RGD Symbol;Acc:1307962]
1.59442	2.90632	1.60038	0.129245	0.999831	-4.54853	ENSRNOG00000029209	Rnf13	ring finger protein 13 [Source:RGD Symbol;Acc:1594062]
1.58536	3.09382	1.48162	0.158039	0.999831	-4.5601	ENSRNOG00000020102	Sirt2	sirtuin 2 [Source:RGD Symbol;Acc:621481]
1.57687	1.41203	1.82924	0.0862308	0.999831	-4.55302	ENSRNOG00000020014	Myh14	myosin heavy chain 14 [Source:RGD Symbol;Acc:1306821]
1.57635	-0.643386	0.963409	0.349804	0.999831	-4.59535	ENSRNOG00000021053	Lsr	lipolysis stimulated lipoprotein receptor [Source:RGD Symbol;Acc:69236]
1.56351	1.31608	1.33348	0.201213	0.999831	-4.58031	ENSRNOG00000009812	Sbf2	SET binding factor 2 [Source:RGD Symbol;Acc:1588657]
1.56046	2.81173	1.62098	0.124732	0.999831	-4.55303	ENSRNOG00000001182	Ndufv3	NADH:ubiquinone oxidoreductase subunit V3 [Source:RGD Symbol;Acc:621020]
1.54739	2.9023	2.40214	0.0289174	0.999831	-4.42483	ENSRNOG00000058662	Ano8	anoctamin 8 [Source:RGD Symbol;Acc:1563946]
1.54633	-0.297463	0.979195	0.342187	0.999831	-4.59541	ENSRNOG00000004346	Notch3	notch receptor 3 [Source:RGD Symbol;Acc:620761]
1.53816	1.99572	1.54621	0.141776	0.999831	-4.54886	ENSRNOG00000053529	AABR07025757.1	None
1.53721	1.87239	1.02935	0.31876	0.999831	-4.59435	ENSRNOG00000033593	Osbpl9	oxysterol binding protein-like 9 [Source:RGD Symbol;Acc:1311508]
1.51674	3.55196	1.71602	0.105625	0.999831	-4.50971	ENSRNOG00000018475	Eif4enif1	eukaryotic translation initiation factor 4E nuclear import factor 1 [Source:RGD Symbol;Acc:1560908]
1.51613	3.17535	1.37717	0.187591	0.999831	-4.55518	ENSRNOG00000010574	Ptpn1	protein tyrosine phosphatase, non-receptor type 1 [Source:RGD Symbol;Acc:61965]
1.49376	-0.918223	0.726684	0.47801	0.999831	-4.59679	ENSRNOG00000027992	Dscam	DS cell adhesion molecule [Source:RGD Symbol;Acc:619992]
1.49158	3.75298	1.712	0.10638	0.999831	-4.47419	ENSRNOG00000016907	Ppp5c	protein phosphatase 5, catalytic subunit [Source:RGD Symbol;Acc:68415]
1.4892	1.1502	2.34252	0.0325385	0.999831	-4.52682	ENSRNOG00000049714	Asap3	ArfGAP with SH3 domain, ankyrin repeat and PH domain 3 [Source:RGD Symbol;Acc:1593929]
1.4818	2.10196	1.69511	0.109597	0.999831	-4.46093	ENSRNOG00000025645	Abca13	ATP binding cassette subfamily A member 13 [Source:RGD Symbol;Acc:1305895]
1.46043	-0.902517	0.621637	0.543014	0.999831	-4.59692	ENSRNOG00000015335	Rpl13	ribosomal protein L13 [Source:RGD Symbol;Acc:621179]
1.45035	-1.1752	1.25931	0.22614	0.999831	-4.59386	ENSRNOG00000054418	AABR07005779.3	None
1.44934	2.54631	1.64297	0.120066	0.999831	-4.54549	ENSRNOG00000009713	Oxa1l	OXA1L, mitochondrial inner membrane protein [Source:RGD Symbol;Acc:1585024]
1.44309	3.0559	1.78584	0.0932598	0.999831	-4.51718	ENSRNOG00000049531	Usp19	ubiquitin specific peptidase 19 [Source:RGD Symbol;Acc:1303276]
1.44126	1.4011	1.80018	0.0908835	0.999831	-4.55763	ENSRNOG00000027590	Jakmip3	janus kinase and microtubule interacting protein 3 [Source:RGD Symbol;Acc:1307177]
1.43518	0.971742	0.489672	0.63107	0.999831	-4.60066	ENSRNOG00000020950	Syvn1	synoviolin 1 [Source:RGD Symbol;Acc:1310488]
1.43484	-0.415968	0.705576	0.490687	0.999831	-4.59845	ENSRNOG00000046947	Ak5	adenylate kinase 5 [Source:RGD Symbol;Acc:1590818]
1.43423	4.18669	2.14056	0.0482032	0.999831	-4.32672	ENSRNOG00000018367	Taldo1	transaldolase 1 [Source:RGD Symbol;Acc:620674]
1.41385	0.753402	2.10651	0.0514472	0.999831	-4.55426	ENSRNOG00000020083	Scly	selenocysteine lyase [Source:RGD Symbol;Acc:1359514]
1.39616	3.64817	1.60725	0.127724	0.999831	-4.52976	ENSRNOG00000045931	Sik3	SIK family kinase 3 [Source:RGD Symbol;Acc:1593938]
1.38885	1.47508	0.975137	0.344134	0.999831	-4.59578	ENSRNOG00000027240	Kndc1	kinase non-catalytic C-lobe domain containing 1 [Source:RGD Symbol;Acc:1565261]
1.38852	1.18355	1.40594	0.179031	0.999831	-4.53883	ENSRNOG00000056297	Fmnl3	formin-like 3 [Source:RGD Symbol;Acc:1583854]
1.37673	1.54084	2.07991	0.0541202	0.999831	-4.52173	ENSRNOG00000047682	LOC103690152	disintegrin and metalloproteinase domain-containing protein 21-like [Source:RGD Symbol;Acc:9083574]
1.37241	3.25878	1.1754	0.257183	0.999831	-4.58175	ENSRNOG00000011060	Unc119	unc-119 lipid binding chaperone [Source:RGD Symbol;Acc:3942]
1.36956	0.240174	0.743006	0.468343	0.999831	-4.59721	ENSRNOG00000005108	Wfs1	wolframin ER transmembrane glycoprotein [Source:RGD Symbol;Acc:68954]
1.35685	2.6219	1.45504	0.165168	0.999831	-4.55453	ENSRNOG00000006763	Rbm18	RNA binding motif protein 18 [Source:RGD Symbol;Acc:1307411]
1.33928	0.928841	0.816335	0.426402	0.999831	-4.59898	ENSRNOG00000004032	Tmem94	transmembrane protein 94 [Source:RGD Symbol;Acc:7685108]
1.33006	2.72236	0.389072	0.702398	0.999831	-4.60686	ENSRNOG00000022485	Chuk	component of inhibitor of nuclear factor kappa B kinase complex [Source:RGD Symbol;Acc:1306661]
1.32918	0.870164	1.25717	0.226892	0.999831	-4.58126	ENSRNOG00000001880	Dgcr6	DiGeorge syndrome critical region gene 6 [Source:RGD Symbol;Acc:1309390]
1.32731	2.47361	0.545978	0.59268	0.999831	-4.59975	ENSRNOG00000005483	Rpap1	RNA polymerase II associated protein 1 [Source:RGD Symbol;Acc:1590891]
1.32629	-0.847593	0.979457	0.342061	0.999831	-4.59565	ENSRNOG00000011654	Plk4	polo-like kinase 4 [Source:RGD Symbol;Acc:1305390]
1.31146	-0.00119297	1.26198	0.225202	0.999831	-4.58853	ENSRNOG00000045569	NA	NA
1.311	1.80159	1.21746	0.241237	0.999831	-4.57831	ENSRNOG00000008039	Cul5	cullin 5 [Source:RGD Symbol;Acc:621742]
1.31001	-1.05775	0.540347	0.596466	0.999831	-4.59958	ENSRNOG00000010720	NA	NA
1.30474	0.00130171	0.903699	0.379679	0.999831	-4.59669	ENSRNOG00000054080	Cgnl1	cingulin-like 1 [Source:RGD Symbol;Acc:1304623]
1.30387	3.41092	1.58851	0.131908	0.999831	-4.50388	ENSRNOG00000054890	Flna	filamin A [Source:RGD Symbol;Acc:1560614]
1.29496	1.48804	1.08325	0.294892	0.999831	-4.5919	ENSRNOG00000020812	Gys1	glycogen synthase 1 [Source:RGD Symbol;Acc:1589798]
1.2821	-0.49216	0.558325	0.58442	0.999831	-4.60205	ENSRNOG00000009596	NA	NA
1.27467	0.252414	1.16629	0.260739	0.999831	-4.59007	ENSRNOG00000052256	Dact3	dishevelled-binding antagonist of beta-catenin 3 [Source:RGD Symbol;Acc:1563892]
1.27379	1.79312	2.00835	0.0619517	0.999831	-4.51827	ENSRNOG00000011777	Spag5	sperm associated antigen 5 [Source:RGD Symbol;Acc:620152]
1.26968	4.20234	0.775459	0.449479	0.999831	-4.66616	ENSRNOG00000018167	Tmem221	transmembrane protein 221 [Source:RGD Symbol;Acc:2319149]
1.25035	0.456189	1.36372	0.191701	0.999831	-4.5688	ENSRNOG00000040205	Zcchc24	zinc finger CCHC-type containing 24 [Source:RGD Symbol;Acc:1306164]
1.24694	5.32979	2.42129	0.0278372	0.999831	-3.76615	ENSRNOG00000007671	Smu1	SMU1, DNA replication regulator and spliceosomal factor [Source:RGD Symbol;Acc:620694]
1.24512	1.62072	1.58968	0.131641	0.999831	-4.55095	ENSRNOG00000025808	Aars2	alanyl-tRNA synthetase 2, mitochondrial [Source:RGD Symbol;Acc:1310617]
1.22077	3.43533	1.22447	0.238653	0.999831	-4.56995	ENSRNOG00000021068	Pip5k1a	phosphatidylinositol-4-phosphate 5-kinase, type 1, alpha [Source:RGD Symbol;Acc:1306127]
1.20868	0.846824	1.41137	0.177455	0.999831	-4.57891	ENSRNOG00000022421	Crtc1	CREB regulated transcription coactivator 1 [Source:RGD Symbol;Acc:1589158]
1.20268	-0.150323	0.515687	0.613188	0.999831	-4.59958	ENSRNOG00000016574	Fiz1	FLT3-interacting zinc finger 1 [Source:RGD Symbol;Acc:1306359]
1.20191	0.992473	0.854449	0.40558	0.999831	-4.5972	ENSRNOG00000003541	Pggt1b	protein geranylgeranyltransferase type I subunit beta [Source:RGD Symbol;Acc:621754]
1.18608	1.30685	1.5157	0.149272	0.999831	-4.5611	ENSRNOG00000020201	Yif1a	Yip1 interacting factor homolog A, membrane trafficking protein [Source:RGD Symbol;Acc:628749]
1.17833	-0.00119735	0.835313	0.41595	0.999831	-4.59671	ENSRNOG00000048553	Iqcc	IQ motif containing C [Source:RGD Symbol;Acc:1583461]
1.17759	2.41081	0.578465	0.571075	0.999831	-4.60034	ENSRNOG00000015816	Bbs7	Bardet-Biedl syndrome 7 [Source:RGD Symbol;Acc:1309264]
1.16699	1.59485	1.95099	0.0689555	0.999831	-4.49825	ENSRNOG00000002881	Ddr2	discoidin domain receptor tyrosine kinase 2 [Source:RGD Symbol;Acc:619855]
1.15465	-0.317132	0.854994	0.405287	0.999831	-4.59676	ENSRNOG00000017839	Ercc1	ERCC excision repair 1, endonuclease non-catalytic subunit [Source:RGD Symbol;Acc:1306992]
1.15362	2.77121	1.60218	0.128845	0.999831	-4.52235	ENSRNOG00000019630	Hacl1	2-hydroxyacyl-CoA lyase 1 [Source:RGD Symbol;Acc:619849]
1.14852	2.69833	1.20421	0.246176	0.999831	-4.57952	ENSRNOG00000017817	Cox4i1	cytochrome c oxidase subunit 4i1 [Source:RGD Symbol;Acc:68374]
1.14275	1.77951	1.73239	0.102605	0.999831	-4.55138	ENSRNOG00000026572	Zfp473	zinc finger protein 473 [Source:RGD Symbol;Acc:1305084]
1.13938	3.02985	1.8036	0.0903239	0.999831	-4.51651	ENSRNOG00000003239	Cant1	calcium activated nucleotidase 1 [Source:RGD Symbol;Acc:628743]
1.13616	0.722775	1.05645	0.306593	0.999831	-4.5936	ENSRNOG00000016414	Slc22a17	solute carrier family 22, member 17 [Source:RGD Symbol;Acc:631405]
1.13297	2.05603	1.00013	0.332265	0.999831	-4.59542	ENSRNOG00000004283	Camta2	calmodulin binding transcription activator 2 [Source:RGD Symbol;Acc:1311296]
1.13028	3.06141	1.18502	0.253465	0.999831	-4.57876	ENSRNOG00000006028	Tubgcp6	tubulin, gamma complex associated protein 6 [Source:RGD Symbol;Acc:1307743]
1.12611	-0.106945	0.68417	0.503744	0.999831	-4.5978	ENSRNOG00000019643	Pcyox1l	prenylcysteine oxidase 1 like [Source:RGD Symbol;Acc:1563290]
1.11673	2.48201	1.94938	0.069163	0.999831	-4.45543	ENSRNOG00000010846	Ccdc22	coiled-coil domain containing 22 [Source:RGD Symbol;Acc:1560910]
1.11486	1.84368	1.13937	0.271467	0.999831	-4.5889	ENSRNOG00000043212	Dip2a	disco-interacting protein 2 homolog A [Source:RGD Symbol;Acc:1582897]
1.11358	1.79179	1.21214	0.243209	0.999831	-4.58511	ENSRNOG00000001035	Gtf2h3	general transcription factor IIH subunit 3 [Source:RGD Symbol;Acc:1305494]
1.09994	1.79257	1.66108	0.116336	0.999831	-4.53536	ENSRNOG00000046660	Gpc6	glypican 6 [Source:RGD Symbol;Acc:1593308]
1.09725	1.1092	1.29074	0.215295	0.999831	-4.5843	ENSRNOG00000004793	Ncln	nicalin [Source:RGD Symbol;Acc:1309355]
1.0967	3.98364	3.3043	0.00452309	0.999831	-3.33471	ENSRNOG00000017737	Dgkz	diacylglycerol kinase zeta [Source:RGD Symbol;Acc:70929]
1.09342	-0.171961	0.802891	0.433907	0.999831	-4.59665	ENSRNOG00000018271	Scamp4	secretory carrier membrane protein 4 [Source:RGD Symbol;Acc:68354]
1.0902	-0.0295031	0.807631	0.431252	0.999831	-4.60309	ENSRNOG00000007046	Cfap70	cilia and flagella associated protein 70 [Source:RGD Symbol;Acc:1307577]
1.08924	2.17621	1.35377	0.19479	0.999831	-4.55523	ENSRNOG00000015029	Dbt	dihydrolipoamide branched chain transacylase E2 [Source:RGD Symbol;Acc:68403]
1.08325	2.3471	0.967808	0.34767	0.999831	-4.59753	ENSRNOG00000020206	Ctsd	cathepsin D [Source:RGD Symbol;Acc:621511]
1.07705	1.70733	1.30172	0.211604	0.999831	-4.56321	ENSRNOG00000005391	Prex2	phosphatidylinositol-3,4,5-trisphosphate-dependent Rac exchange factor 2 [Source:RGD Symbol;Acc:1307865]
1.07645	0.257893	0.864731	0.400079	0.999831	-4.59838	ENSRNOG00000021891	Zdhhc8	zinc finger DHHC-type palmitoyltransferase 8 [Source:RGD Symbol;Acc:1308875]
1.06919	0.897377	0.648704	0.525813	0.999831	-4.60808	ENSRNOG00000002914	Trmt1	tRNA methyltransferase 1 [Source:RGD Symbol;Acc:1305992]
1.05747	0.666761	1.76004	0.097672	0.999831	-4.54881	ENSRNOG00000016575	Tnfrsf1b	TNF receptor superfamily member 1B [Source:RGD Symbol;Acc:621238]
1.05709	0.917544	1.256	0.227307	0.999831	-4.58829	ENSRNOG00000019721	Ypel3	yippee-like 3 [Source:RGD Symbol;Acc:1564579]
1.05462	3.59913	1.4723	0.160509	0.999831	-4.54261	ENSRNOG00000011439	Grk5	G protein-coupled receptor kinase 5 [Source:RGD Symbol;Acc:61985]
1.04479	1.18672	1.55115	0.140591	0.999831	-4.55475	ENSRNOG00000016265	Acsl5	acyl-CoA synthetase long-chain family member 5 [Source:RGD Symbol;Acc:69402]
1.04123	1.41277	1.26466	0.224262	0.999831	-4.58489	ENSRNOG00000017571	Ndufa2	NADH:ubiquinone oxidoreductase subunit A2 [Source:RGD Symbol;Acc:1309997]
1.03977	-1.03003	0.412128	0.685763	0.999831	-4.59794	ENSRNOG00000020474	Pin1	peptidylprolyl cis/trans isomerase, NIMA-interacting 1 [Source:RGD Symbol;Acc:1310299]
1.02608	0.956126	1.1205	0.279182	0.999831	-4.58826	ENSRNOG00000013911	Nagk	N-acetylglucosamine kinase [Source:RGD Symbol;Acc:1305057]
1.02434	2.9224	1.71691	0.105459	0.999831	-4.5123	ENSRNOG00000036667	Hexd	hexosaminidase D [Source:RGD Symbol;Acc:2302323]
1.01985	0.944172	1.37553	0.188086	0.999831	-4.58496	ENSRNOG00000023746	Tmem39b	transmembrane protein 39b [Source:RGD Symbol;Acc:1359450]
1.0183	-0.927448	0.604744	0.553904	0.999831	-4.59881	ENSRNOG00000019651	Slc12a4	solute carrier family 12 member 4 [Source:RGD Symbol;Acc:3687]
1.01362	1.08416	1.28381	0.21765	0.999831	-4.58153	ENSRNOG00000004276	Itga3	integrin subunit alpha 3 [Source:RGD Symbol;Acc:1310333]
1.01247	0.699199	0.629302	0.538113	0.999831	-4.61032	ENSRNOG00000060430	Y_RNA	Y RNA [Source:RGD Symbol;Acc:15013317]
1.00868	-0.647021	0.54796	0.59135	0.999831	-4.59809	ENSRNOG00000001402	Lrch4	leucine rich repeats and calponin homology domain containing 4 [Source:RGD Symbol;Acc:1306145]
1.00456	3.15727	1.02801	0.319371	0.999831	-4.59536	ENSRNOG00000050057	Abca3	ATP binding cassette subfamily A member 3 [Source:RGD Symbol;Acc:1307174]
1.00354	-0.263313	0.379318	0.709483	0.999831	-4.59967	ENSRNOG00000059408	Prr12	proline rich 12 [Source:RGD Symbol;Acc:1309896]
0.992651	1.48482	1.17125	0.258798	0.999831	-4.58161	ENSRNOG00000014275	AABR07026291.1	hook microtubule-tethering protein 3 [Source:RGD Symbol;Acc:1560960]
0.991722	1.36578	1.26202	0.225188	0.999831	-4.58671	ENSRNOG00000060337	Exosc7	exosome component 7 [Source:RGD Symbol;Acc:1309758]
0.989376	2.77965	1.31735	0.206438	0.999831	-4.56283	ENSRNOG00000006828	Baz1a	bromodomain adjacent to zinc finger domain, 1A [Source:RGD Symbol;Acc:1306199]
0.983259	0.823427	1.81201	0.0889628	0.999831	-4.57385	ENSRNOG00000013433	Gnrh1	gonadotropin releasing hormone 1 [Source:RGD Symbol;Acc:2720]
0.978164	-0.014453	0.851127	0.407368	0.999831	-4.59886	ENSRNOG00000059857	Rnd1	Rho family GTPase 1 [Source:RGD Symbol;Acc:1306338]
0.975509	-0.392956	0.641558	0.530324	0.999831	-4.59989	ENSRNOG00000008678	Antxr1	ANTXR cell adhesion molecule 1 [Source:RGD Symbol;Acc:1307144]
0.973698	2.64985	1.93848	0.0705761	0.999831	-4.32196	ENSRNOG00000007830	Apold1	apolipoprotein L domain containing 1 [Source:RGD Symbol;Acc:1303123]
0.97218	-0.207759	0.724943	0.479048	0.999831	-4.59817	ENSRNOG00000013201	Tex264	testis expressed 264 [Source:RGD Symbol;Acc:1359353]
0.968144	-1.65829	0.14568	0.88601	0.999831	-4.5982	ENSRNOG00000005958	Rrbp1	ribosome binding protein 1 [Source:RGD Symbol;Acc:1306536]
0.967743	4.04284	1.21059	0.243789	0.999831	-4.56125	ENSRNOG00000022305	Abcc1	ATP binding cassette subfamily C member 1 [Source:RGD Symbol;Acc:3112]
0.961935	1.97286	1.32031	0.205471	0.999831	-4.56299	ENSRNOG00000015589	Smyd5	SMYD family member 5 [Source:RGD Symbol;Acc:1309153]
0.959207	1.38993	1.18806	0.252299	0.999831	-4.58772	ENSRNOG00000002697	Mtmr1	myotubularin related protein 1 [Source:RGD Symbol;Acc:1306569]
0.956779	-0.64308	0.428242	0.674234	0.999831	-4.59879	ENSRNOG00000002176	Nectin3	nectin cell adhesion molecule 3 [Source:RGD Symbol;Acc:1309516]
0.953231	1.62257	1.87853	0.078819	0.999831	-4.54257	ENSRNOG00000004509	Eapp	E2F-associated phosphoprotein [Source:RGD Symbol;Acc:1309624]
0.949593	1.21551	0.190979	0.850965	0.999831	-4.60356	ENSRNOG00000002343	Uchl1	ubiquitin C-terminal hydrolase L1 [Source:RGD Symbol;Acc:3928]
0.949556	2.87756	3.29704	0.00459261	0.999831	-3.74651	ENSRNOG00000012058	Egflam	EGF-like, fibronectin type III and laminin G domains [Source:RGD Symbol;Acc:1306592]
0.942934	1.49032	0.45192	0.657447	0.999831	-4.6058	ENSRNOG00000005504	Pkp4	plakophilin 4 [Source:RGD Symbol;Acc:1307840]
0.930795	2.03488	1.18129	0.254901	0.999831	-4.5779	ENSRNOG00000002452	Txndc11	thioredoxin domain containing 11 [Source:RGD Symbol;Acc:1307538]
0.904844	0.289511	0.428682	0.673921	0.999831	-4.59971	ENSRNOG00000003724	Mrpl27	mitochondrial ribosomal protein L27 [Source:RGD Symbol;Acc:1309090]
0.896907	0.933955	0.747219	0.465867	0.999831	-4.59907	ENSRNOG00000000507	Tulp1	TUB like protein 1 [Source:RGD Symbol;Acc:1311062]
0.896299	2.04644	1.24513	0.23117	0.999831	-4.57655	ENSRNOG00000057880	Myh11	myosin heavy chain 11 [Source:RGD Symbol;Acc:3136]
0.888856	0.846984	0.691051	0.499525	0.999831	-4.60516	ENSRNOG00000018019	Hspa12a	heat shock protein family A (Hsp70) member 12A [Source:RGD Symbol;Acc:1305531]
0.888661	0.393578	0.881906	0.391	0.999831	-4.5974	ENSRNOG00000061684	Ndufa9	NADH:ubiquinone oxidoreductase subunit A9 [Source:RGD Symbol;Acc:1307307]
0.888559	0.229976	0.40612	0.690082	0.999831	-4.60027	ENSRNOG00000016434	Prkd2	protein kinase D2 [Source:RGD Symbol;Acc:1308054]
0.882911	2.14333	1.32454	0.204095	0.999831	-4.56307	ENSRNOG00000009513	Akr1b1	aldo-keto reductase family 1 member B1 [Source:RGD Symbol;Acc:2092]
0.879543	1.17146	0.923799	0.369434	0.999831	-4.59784	ENSRNOG00000013828	Sirt3	sirtuin 3 [Source:RGD Symbol;Acc:1308374]
0.875201	0.958208	1.74177	0.100906	0.999831	-4.54469	ENSRNOG00000037815	Aldh2	aldehyde dehydrogenase 2 family member [Source:RGD Symbol;Acc:69219]
0.874162	1.60659	0.891619	0.385926	0.999831	-4.5995	ENSRNOG00000050381	Dus3l	dihydrouridine synthase 3-like [Source:RGD Symbol;Acc:1563228]
0.86884	0.809731	1.20187	0.247054	0.999831	-4.58914	ENSRNOG00000023830	Dnase2	deoxyribonuclease 2, lysosomal [Source:RGD Symbol;Acc:621457]
0.861979	3.89284	0.935207	0.363705	0.999831	-4.62995	ENSRNOG00000036592	Zfp518a	zinc finger protein 518A [Source:RGD Symbol;Acc:1305314]
0.858228	-0.564057	0.50486	0.6206	0.999831	-4.60019	ENSRNOG00000011202	Chrna4	cholinergic receptor nicotinic alpha 4 subunit [Source:RGD Symbol;Acc:2346]
0.856716	3.36473	3.04846	0.0077251	0.999831	-3.6955	ENSRNOG00000021553	Nckap5	NCK-associated protein 5 [Source:RGD Symbol;Acc:1564507]
0.85174	2.6617	1.45433	0.165362	0.999831	-4.55432	ENSRNOG00000018483	Smad1	SMAD family member 1 [Source:RGD Symbol;Acc:3030]
0.844486	2.62121	1.08632	0.293574	0.999831	-4.58874	ENSRNOG00000011684	Auh	AU RNA binding methylglutaconyl-CoA hydratase [Source:RGD Symbol;Acc:1306087]
0.842285	2.62507	2.21379	0.0418536	0.999831	-4.38377	ENSRNOG00000008720	Wbp1	WW domain binding protein 1 [Source:RGD Symbol;Acc:1304961]
0.840254	1.55416	0.483831	0.635119	0.999831	-4.6039	ENSRNOG00000008392	Sbf1	SET binding factor 1 [Source:RGD Symbol;Acc:1307090]
0.837741	1.13155	1.10524	0.285544	0.999831	-4.58825	ENSRNOG00000032780	Mrpl58	mitochondrial ribosomal protein L58 [Source:RGD Symbol;Acc:1307942]
0.832003	3.60066	3.10907	0.0068077	0.999831	-3.86724	ENSRNOG00000013631	Slc31a2	solute carrier family 31 member 2 [Source:RGD Symbol;Acc:1307963]
0.824618	-0.0252869	0.660982	0.518112	0.999831	-4.60486	ENSRNOG00000014090	Retsat	retinol saturase [Source:RGD Symbol;Acc:628802]
0.822932	3.05743	2.79248	0.013125	0.999831	-3.94503	ENSRNOG00000007607	Nr4a1	nuclear receptor subfamily 4, group A, member 1 [Source:RGD Symbol;Acc:620029]
0.820075	0.834961	0.855129	0.405215	0.999831	-4.60305	ENSRNOG00000020797	She	Src homology 2 domain containing E [Source:RGD Symbol;Acc:1583215]
0.807792	-0.480982	0.560489	0.582978	0.999831	-4.60037	ENSRNOG00000015177	Sun2	Sad1 and UNC84 domain containing 2 [Source:RGD Symbol;Acc:1563141]
0.796057	2.79229	1.60179	0.12893	0.999831	-4.42671	ENSRNOG00000055340	Ski	Ski proto-oncogene [Source:RGD Symbol;Acc:1565591]
0.791464	-0.43519	0.548921	0.590706	0.999831	-4.59862	ENSRNOG00000009749	Wdr45	WD repeat domain 45 [Source:RGD Symbol;Acc:1359718]
0.787167	2.19672	0.863485	0.400743	0.999831	-4.60125	ENSRNOG00000017165	Akr1e2	aldo-keto reductase family 1, member E2 [Source:RGD Symbol;Acc:1309599]
0.777822	1.75347	1.40678	0.178789	0.999831	-4.54675	ENSRNOG00000012443	Cpt2	carnitine palmitoyltransferase 2 [Source:RGD Symbol;Acc:2398]
0.777205	1.72547	1.76452	0.096894	0.999831	-4.51572	ENSRNOG00000056524	Abcd1	ATP binding cassette subfamily D member 1 [Source:RGD Symbol;Acc:1562128]
0.777053	-0.786611	0.506243	0.619651	0.999831	-4.59784	ENSRNOG00000019082	NA	NA
0.772712	3.48688	1.94246	0.0700561	0.999831	-4.33303	ENSRNOG00000003160	NA	NA
0.768911	2.52903	1.41924	0.175185	0.999831	-4.54193	ENSRNOG00000007131	Paxip1	PAX interacting protein 1 [Source:RGD Symbol;Acc:1307547]
0.76697	1.50165	2.83709	0.0119734	0.999831	-4.42595	ENSRNOG00000059381	Mrps6	mitochondrial ribosomal protein S6 [Source:RGD Symbol;Acc:2322928]
0.765752	0.855743	1.16901	0.259673	0.999831	-4.58904	ENSRNOG00000010227	Gpatch2l	G patch domain containing 2-like [Source:RGD Symbol;Acc:1308907]
0.7654	2.65558	0.93127	0.365676	0.999831	-4.63032	ENSRNOG00000005144	Tmem18	transmembrane protein 18 [Source:RGD Symbol;Acc:1359389]
0.762904	5.08865	1.85714	0.0819622	0.999831	-4.12732	ENSRNOG00000019422	Egr1	early growth response 1 [Source:RGD Symbol;Acc:2544]
0.762165	-0.55559	0.315498	0.756497	0.999831	-4.60037	ENSRNOG00000012016	Npc1	NPC intracellular cholesterol transporter 1 [Source:RGD Symbol;Acc:628693]
0.754475	2.81516	0.87421	0.395051	0.999831	-4.61227	ENSRNOG00000050193	NA	NA
0.746566	0.967395	1.84314	0.0840807	0.999831	-4.53184	ENSRNOG00000049895	NA	NA
0.743424	1.29941	1.25673	0.227048	0.999831	-4.58101	ENSRNOG00000016553	Vwa5b1	von Willebrand factor A domain containing 5B1 [Source:RGD Symbol;Acc:1308559]
0.74212	1.87945	1.04956	0.309654	0.999831	-4.59286	ENSRNOG00000017777	Ahcy	adenosylhomocysteinase [Source:RGD Symbol;Acc:69260]
0.740295	1.06598	0.813827	0.427795	0.999831	-4.60032	ENSRNOG00000050636	Arhgef10l	Rho guanine nucleotide exchange factor 10 like [Source:RGD Symbol;Acc:1585585]
0.737268	0.239842	0.516769	0.612449	0.999831	-4.60361	ENSRNOG00000020093	LOC100360573	ribosomal protein S12-like [Source:RGD Symbol;Acc:2321884]
0.737132	1.00304	1.20254	0.246804	0.999831	-4.5837	ENSRNOG00000020673	Pbxip1	PBX homeobox interacting protein 1 [Source:RGD Symbol;Acc:1305180]
0.736142	3.0575	3.42065	0.00354222	0.999831	-3.74823	ENSRNOG00000015736	Dhrs3	dehydrogenase/reductase 3 [Source:RGD Symbol;Acc:1305584]
0.73389	4.54661	1.7493	0.0995632	0.999831	-4.32639	ENSRNOG00000007551	Patj	PATJ, crumbs cell polarity complex component [Source:RGD Symbol;Acc:1565362]
0.733833	3.24907	1.06044	0.30483	0.999831	-4.59965	ENSRNOG00000010964	Akap13	A-kinase anchoring protein 13 [Source:RGD Symbol;Acc:727893]
0.725643	4.78655	2.92761	0.00993031	0.999831	-3.49436	ENSRNOG00000019506	Dnajb2	DnaJ heat shock protein family (Hsp40) member B2 [Source:RGD Symbol;Acc:1591035]
0.721389	1.28268	0.739255	0.470554	0.999831	-4.60471	ENSRNOG00000016975	Pxmp4	peroxisomal membrane protein 4 [Source:RGD Symbol;Acc:628782]
0.720228	3.47293	1.98329	0.0649287	0.999831	-4.17574	ENSRNOG00000008338	Bsdc1	BSD domain containing 1 [Source:RGD Symbol;Acc:1311622]
0.718021	3.85996	2.00103	0.0628079	0.999831	-4.23865	ENSRNOG00000007763	Plod1	procollagen-lysine, 2-oxoglutarate 5-dioxygenase 1 [Source:RGD Symbol;Acc:621382]
0.716585	-2.67687	0.312	0.759106	0.999831	-4.59804	ENSRNOG00000011595	Senp8	SUMO peptidase family member, NEDD8 specific [Source:RGD Symbol;Acc:1309955]
0.713567	1.96648	1.04332	0.312444	0.999831	-4.59357	ENSRNOG00000013048	Pde7a	phosphodiesterase 7A [Source:RGD Symbol;Acc:68391]
0.712508	3.63991	2.91611	0.0101697	0.999831	-3.85683	ENSRNOG00000011384	Aimp1	aminoacyl tRNA synthetase complex-interacting multifunctional protein 1 [Source:RGD Symbol;Acc:620466]
0.711544	-0.116198	1.20878	0.244462	0.999831	-4.58407	ENSRNOG00000050703	NA	NA
0.709907	1.80755	1.49012	0.155812	0.999831	-4.5529	ENSRNOG00000055082	Maz	MYC associated zinc finger protein [Source:RGD Symbol;Acc:1594632]
0.707815	2.88818	2.27369	0.0372466	0.999831	-4.22631	ENSRNOG00000001559	Mtx2	metaxin 2 [Source:RGD Symbol;Acc:1306473]
0.705671	2.65545	0.791061	0.44058	0.999831	-4.61264	ENSRNOG00000050275	NA	NA
0.704898	1.33579	1.33654	0.200233	0.999831	-4.56598	ENSRNOG00000017021	Galnt18	polypeptide N-acetylgalactosaminyltransferase 18 [Source:RGD Symbol;Acc:1309623]
0.701987	0.188074	0.274995	0.78687	0.999831	-4.60239	ENSRNOG00000001404	Agfg2	ArfGAP with FG repeats 2 [Source:RGD Symbol;Acc:1306590]
0.701361	2.12525	1.57048	0.136039	0.999831	-4.51636	ENSRNOG00000019712	Ints11	integrator complex subunit 11 [Source:RGD Symbol;Acc:1306841]
0.699648	1.58079	1.35506	0.194388	0.999831	-4.5714	ENSRNOG00000018391	Cdk2ap2	cyclin-dependent kinase 2 associated protein 2 [Source:RGD Symbol;Acc:1588883]
0.698241	3.5927	0.920675	0.371014	0.999831	-4.62345	ENSRNOG00000005472	Sp4	Sp4 transcription factor [Source:RGD Symbol;Acc:3741]
0.696496	3.35699	1.27515	0.220623	0.999831	-4.55256	ENSRNOG00000007842	Aup1	AUP1, lipid droplet regulating VLDL assembly factor [Source:RGD Symbol;Acc:1591777]
0.689169	-0.015312	0.534319	0.600532	0.999831	-4.60719	ENSRNOG00000013045	Setd7	SET domain containing 7, histone lysine methyltransferase [Source:RGD Symbol;Acc:1586346]
0.688471	-0.857312	0.383519	0.706428	0.999831	-4.59905	ENSRNOG00000021390	Meis3	Meis homeobox 3 [Source:RGD Symbol;Acc:1308532]
0.688254	0.547488	0.632267	0.536223	0.999831	-4.59961	ENSRNOG00000006025	Lamb3	laminin subunit beta 3 [Source:RGD Symbol;Acc:1562668]
0.685147	1.48536	0.93575	0.363434	0.999831	-4.60128	ENSRNOG00000022929	Mtmr12	myotubularin related protein 12 [Source:RGD Symbol;Acc:1307902]
0.683226	1.11979	1.51337	0.149859	0.999831	-4.56939	ENSRNOG00000000913	Gusb	glucuronidase, beta [Source:RGD Symbol;Acc:2772]
0.682252	2.21959	2.86835	0.0112256	0.999831	-4.07638	ENSRNOG00000033101	Myo18a	myosin XVIIIa [Source:RGD Symbol;Acc:1562698]
0.679413	2.0307	1.30566	0.210294	0.999831	-4.55746	ENSRNOG00000046984	St6galnac6	ST6 N-acetylgalactosaminide alpha-2,6-sialyltransferase 6 [Source:RGD Symbol;Acc:1303196]
0.679158	1.97023	0.452135	0.657295	0.999831	-4.61722	ENSRNOG00000047247	Ptprs	protein tyrosine phosphatase, receptor type, S [Source:RGD Symbol;Acc:3452]
0.678691	-0.448897	0.19048	0.85135	0.999831	-4.60092	ENSRNOG00000022686	Zdhhc2	zinc finger DHHC-type palmitoyltransferase 2 [Source:RGD Symbol;Acc:628681]
0.674876	2.27107	0.99259	0.335815	0.999831	-4.59779	ENSRNOG00000001203	Rrp1	ribosomal RNA processing 1 [Source:RGD Symbol;Acc:1307286]
0.670098	4.1122	1.97307	0.0661786	0.999831	-4.13114	ENSRNOG00000005176	Map7d2	MAP7 domain containing 2 [Source:RGD Symbol;Acc:1564852]
0.668369	2.38686	0.333366	0.743225	0.999831	-4.61277	ENSRNOG00000019383	Tef	TEF transcription factor, PAR bZIP family member [Source:RGD Symbol;Acc:3841]
0.668342	1.68303	0.640352	0.531088	0.999831	-4.60689	ENSRNOG00000014193	Lig1	DNA ligase 1 [Source:RGD Symbol;Acc:621424]
0.668062	4.02034	0.687284	0.501832	0.999831	-4.67122	ENSRNOG00000008716	Nefh	neurofilament heavy chain [Source:RGD Symbol;Acc:3159]
0.66796	4.00711	1.62176	0.124565	0.999831	-4.39769	ENSRNOG00000002516	Mtm1	myotubularin 1 [Source:RGD Symbol;Acc:1304582]
0.666738	-0.108482	0.424622	0.676817	0.999831	-4.60073	ENSRNOG00000028350	Arsl	arylsulfatase L [Source:RGD Symbol;Acc:1304917]
0.665985	6.36122	2.25264	0.0388088	0.999831	-3.7843	ENSRNOG00000016991	Arl2bp	ADP-ribosylation factor like GTPase 2 binding protein [Source:RGD Symbol;Acc:1561471]
0.659368	3.56104	2.25594	0.0385605	0.999831	-3.9521	ENSRNOG00000015602	Cdh2	cadherin 2 [Source:RGD Symbol;Acc:69280]
0.658022	1.4448	0.730129	0.47596	0.999831	-4.62742	ENSRNOG00000009700	Dync1i1	dynein cytoplasmic 1 intermediate chain 1 [Source:RGD Symbol;Acc:2512]
0.653635	1.88845	2.02321	0.0602451	0.999831	-4.44042	ENSRNOG00000017718	Tmco6	transmembrane and coiled-coil domains 6 [Source:RGD Symbol;Acc:1309263]
0.65035	2.71228	0.590761	0.563007	0.999831	-4.64263	ENSRNOG00000013305	Atp2c1	ATPase secretory pathway Ca2+ transporting 1 [Source:RGD Symbol;Acc:621311]
0.646986	3.1343	1.38657	0.184759	0.999831	-4.53085	ENSRNOG00000058133	Ppm1n	protein phosphatase, Mg2+/Mn2+ dependent 1N [Source:RGD Symbol;Acc:1562091]
0.645302	4.21025	1.10174	0.287017	0.999831	-4.62721	ENSRNOG00000004013	Grip1	glutamate receptor interacting protein 1 [Source:RGD Symbol;Acc:621667]
0.639778	1.87693	2.02027	0.0605795	0.999831	-4.51978	ENSRNOG00000053811	Arg2	arginase 2 [Source:RGD Symbol;Acc:2151]
0.63891	-0.129456	0.338783	0.739217	0.999831	-4.6021	ENSRNOG00000021090	Pygm	glycogen phosphorylase, muscle associated [Source:RGD Symbol;Acc:3461]
0.638647	2.26008	1.25249	0.228548	0.999831	-4.56373	ENSRNOG00000018599	Gga2	golgi associated, gamma adaptin ear containing, ARF binding protein 2 [Source:RGD Symbol;Acc:1304800]
0.624665	3.91318	1.71539	0.105743	0.999831	-4.32814	ENSRNOG00000005012	Utp14a	UTP14A small subunit processome component [Source:RGD Symbol;Acc:1359313]
0.622162	2.46523	1.27722	0.219908	0.999831	-4.56136	ENSRNOG00000048848	Inafm1	InaF-motif containing 1 [Source:RGD Symbol;Acc:2301983]
0.619912	1.04993	1.7542	0.0986967	0.999831	-4.53992	ENSRNOG00000008577	Fbf1	Fas binding factor 1 [Source:RGD Symbol;Acc:1310662]
0.619503	3.18785	1.37834	0.187236	0.999831	-4.5197	ENSRNOG00000006199	Crppa	CDP-L-ribitol pyrophosphorylase A [Source:RGD Symbol;Acc:1359368]
0.619449	1.43398	1.70165	0.108341	0.999831	-4.53143	ENSRNOG00000012622	Mmp15	matrix metallopeptidase 15 [Source:RGD Symbol;Acc:1308937]
0.618361	0.894265	1.49594	0.154305	0.999831	-4.53572	ENSRNOG00000001242	Gstt3	glutathione S-transferase, theta 3 [Source:RGD Symbol;Acc:1562732]
0.615149	0.548634	0.272421	0.788814	0.999831	-4.60508	ENSRNOG00000002795	Cog1	component of oligomeric golgi complex 1 [Source:RGD Symbol;Acc:1304594]
0.612767	1.13453	0.789021	0.441737	0.999831	-4.59789	ENSRNOG00000060437	AC239701.1	None
0.61191	2.65143	1.16795	0.260087	0.999831	-4.57453	ENSRNOG00000056617	Zswim8	zinc finger, SWIM-type containing 8 [Source:RGD Symbol;Acc:1309414]
0.610145	4.18974	2.37543	0.0304897	0.999831	-3.85531	ENSRNOG00000046955	Cbx6	chromobox 6 [Source:RGD Symbol;Acc:1307314]
0.605899	0.865104	1.15789	0.264053	0.999831	-4.5888	ENSRNOG00000058317	Pnck	pregnancy up-regulated nonubiquitous CaM kinase [Source:RGD Symbol;Acc:69249]
0.605675	4.59521	1.44341	0.168368	0.999831	-4.44127	ENSRNOG00000010650	Plekhh1	pleckstrin homology, MyTH4 and FERM domain containing H1 [Source:RGD Symbol;Acc:1308362]
0.602599	1.57526	1.23676	0.234178	0.999831	-4.57935	ENSRNOG00000023837	Mtx3	metaxin 3 [Source:RGD Symbol;Acc:1583002]
0.602359	1.29903	1.00953	0.327876	0.999831	-4.59544	ENSRNOG00000054515	Fgd6	FYVE, RhoGEF and PH domain containing 6 [Source:RGD Symbol;Acc:1565609]
0.599495	3.20273	2.28053	0.0367518	0.999831	-4.07742	ENSRNOG00000051952	Tes	testin LIM domain protein [Source:RGD Symbol;Acc:1566346]
0.594804	4.23194	2.05987	0.0562168	0.999831	-4.15486	ENSRNOG00000014429	Arfgap2	ADP-ribosylation factor GTPase activating protein 2 [Source:RGD Symbol;Acc:1306177]
0.593571	1.70297	1.01602	0.324871	0.999831	-4.59526	ENSRNOG00000012954	Eefsec	eukaryotic elongation factor, selenocysteine-tRNA-specific [Source:RGD Symbol;Acc:1560552]
0.593075	2.81677	1.10619	0.285145	0.999831	-4.58508	ENSRNOG00000045747	NA	NA
0.592353	2.63534	1.68887	0.110807	0.999831	-4.45972	ENSRNOG00000029134	Adgrl1	adhesion G protein-coupled receptor L1 [Source:RGD Symbol;Acc:620768]
0.591053	2.52693	0.85823	0.403551	0.999831	-4.61704	ENSRNOG00000003719	Atpaf2	ATP synthase mitochondrial F1 complex assembly factor 2 [Source:RGD Symbol;Acc:1305161]
0.590884	5.55302	2.47343	0.0250858	0.999831	-3.61152	ENSRNOG00000003117	Psmd12	proteasome 26S subunit, non-ATPase 12 [Source:RGD Symbol;Acc:1359305]
0.590607	2.60132	2.54461	0.0217442	0.999831	-4.17611	ENSRNOG00000011992	Slc18a1	solute carrier family 18 member A1 [Source:RGD Symbol;Acc:3693]
0.589186	1.85873	1.56928	0.136318	0.999831	-4.53293	ENSRNOG00000025818	Zxdc	ZXD family zinc finger C [Source:RGD Symbol;Acc:1561296]
0.588491	1.12997	0.868928	0.397847	0.999831	-4.60067	ENSRNOG00000020238	Plekhh3	pleckstrin homology, MyTH4 and FERM domain containing H3 [Source:RGD Symbol;Acc:1304854]
0.586386	1.44387	0.726339	0.478215	0.999831	-4.60214	ENSRNOG00000050181	NA	NA
0.584303	2.2829	1.76429	0.0969337	0.999831	-4.41009	ENSRNOG00000001817	Tm7sf3	transmembrane 7 superfamily member 3 [Source:RGD Symbol;Acc:1306752]
0.583966	2.55966	1.58943	0.131698	0.999831	-4.5005	ENSRNOG00000024998	Trps1	transcriptional repressor GATA binding 1 [Source:RGD Symbol;Acc:1311883]
0.583916	5.0679	1.149	0.26759	0.999831	-4.59259	ENSRNOG00000000532	Cmtr1	cap methyltransferase 1 [Source:RGD Symbol;Acc:1307801]
0.583502	0.270114	0.482036	0.636366	0.999831	-4.6	ENSRNOG00000020704	Tkfc	triokinase and FMN cyclase [Source:RGD Symbol;Acc:1311026]
0.582772	6.42306	1.83378	0.0855228	0.999831	-4.14514	ENSRNOG00000014616	Iars1	isoleucyl-tRNA synthetase 1 [Source:RGD Symbol;Acc:621022]
0.582737	1.39182	1.28475	0.217329	0.999831	-4.56199	ENSRNOG00000014029	Klhl13	kelch-like family member 13 [Source:RGD Symbol;Acc:1559646]
0.579927	6.13098	1.912	0.0741168	0.999831	-4.07627	ENSRNOG00000016427	Letm1	leucine zipper and EF-hand containing transmembrane protein 1 [Source:RGD Symbol;Acc:1359678]
0.578508	3.39221	2.09448	0.0526405	0.999831	-4.10105	ENSRNOG00000007267	Mnat1	MNAT1 component of CDK activating kinase [Source:RGD Symbol;Acc:628874]
0.576533	1.44701	1.24302	0.231927	0.999831	-4.58013	ENSRNOG00000009595	Zbtb48	zinc finger and BTB domain containing 48 [Source:RGD Symbol;Acc:1311581]
0.575952	1.52304	1.5756	0.134855	0.999831	-4.52704	ENSRNOG00000014879	Ttc7a	tetratricopeptide repeat domain 7A [Source:RGD Symbol;Acc:1306211]
0.574298	4.30089	1.45954	0.163943	0.999831	-4.44214	ENSRNOG00000030704	Eif4g1-ps1	eukaryotic translation initiation factor 4 gamma 1, pseudogene 1 [Source:RGD Symbol;Acc:1583489]
0.574082	3.7649	1.976	0.0658185	0.999831	-4.21001	ENSRNOG00000021233	Itpa	inosine triphosphatase [Source:RGD Symbol;Acc:1589751]
0.572199	0.324712	0.511181	0.616268	0.999831	-4.60413	ENSRNOG00000018536	Pck2	phosphoenolpyruvate carboxykinase 2 (mitochondrial) [Source:RGD Symbol;Acc:1311112]
0.571155	2.96044	2.12979	0.049208	0.999831	-4.22094	ENSRNOG00000012651	Cwc22	CWC22 spliceosome associated protein [Source:RGD Symbol;Acc:1565385]
0.569517	-0.590636	0.300249	0.767887	0.999831	-4.59932	ENSRNOG00000018468	Ldb1	LIM domain binding 1 [Source:RGD Symbol;Acc:1310359]
0.569295	4.45133	1.00888	0.328178	0.999831	-4.65446	ENSRNOG00000013837	Tp53bp1	tumor protein p53 binding protein 1 [Source:RGD Symbol;Acc:1308039]
0.568372	0.446029	0.288794	0.77648	0.999831	-4.61697	ENSRNOG00000061050	Mboat2	membrane bound O-acyltransferase domain containing 2 [Source:RGD Symbol;Acc:1305798]
0.567416	5.24789	2.01045	0.0617075	0.999831	-4.05164	ENSRNOG00000023210	Trappc10	trafficking protein particle complex subunit 10 [Source:RGD Symbol;Acc:1311263]
0.565615	2.54345	1.7367	0.101822	0.999831	-4.41032	ENSRNOG00000053687	Znf660	zinc finger protein 660 [Source:RGD Symbol;Acc:11394460]
0.564462	2.03445	0.477356	0.639621	0.999831	-4.60758	ENSRNOG00000057194	Tars2	threonyl-tRNA synthetase 2, mitochondrial [Source:RGD Symbol;Acc:1308283]
0.563239	2.69907	0.850788	0.40755	0.999831	-4.64076	ENSRNOG00000007018	Mapkbp1	mitogen activated protein kinase binding protein 1 [Source:RGD Symbol;Acc:1307578]
0.563181	4.92335	1.76926	0.0960751	0.999831	-4.23322	ENSRNOG00000008431	Gabbr2	gamma-aminobutyric acid type B receptor subunit 2 [Source:RGD Symbol;Acc:619864]
0.56267	3.43642	3.1435	0.00633513	0.999831	-3.69216	ENSRNOG00000017714	Usp3	ubiquitin specific peptidase 3 [Source:RGD Symbol;Acc:1308852]
0.561706	1.56809	1.31801	0.206224	0.999831	-4.57194	ENSRNOG00000000974	Zfp358	zinc finger protein 358 [Source:RGD Symbol;Acc:1310416]
0.55935	1.83369	0.709309	0.488431	0.999831	-4.61521	ENSRNOG00000009355	Ogfr	opioid growth factor receptor [Source:RGD Symbol;Acc:69324]
0.558527	0.614549	1.46516	0.162423	0.999831	-4.56466	ENSRNOG00000007422	Vav2	vav guanine nucleotide exchange factor 2 [Source:RGD Symbol;Acc:1306285]
0.558508	1.67293	1.31703	0.206544	0.999831	-4.57568	ENSRNOG00000017927	Drd4	dopamine receptor D4 [Source:RGD Symbol;Acc:2522]
0.556906	2.20052	0.949943	0.356395	0.999831	-4.61456	ENSRNOG00000022609	Mrps10	mitochondrial ribosomal protein S10 [Source:RGD Symbol;Acc:1311516]
0.554652	2.51508	1.53927	0.143452	0.999831	-4.50367	ENSRNOG00000020792	Etv4	ETS variant transcription factor 4 [Source:RGD Symbol;Acc:1306524]
0.554532	2.49489	1.77458	0.0951639	0.999831	-4.44887	ENSRNOG00000018736	NA	NA
0.553765	2.23246	1.81458	0.0885503	0.999831	-4.46574	ENSRNOG00000028017	Tmem109	transmembrane protein 109 [Source:RGD Symbol;Acc:1359538]
0.553354	1.30003	1.38608	0.184904	0.999831	-4.56736	ENSRNOG00000037720	Rita1	RBPJ interacting and tubulin associated 1 [Source:RGD Symbol;Acc:1306772]
0.5533	2.21618	0.884219	0.389787	0.999831	-4.60438	ENSRNOG00000010125	Mtrex	Mtr4 exosome RNA helicase [Source:RGD Symbol;Acc:1305984]
0.552737	2.25276	1.08803	0.292843	0.999831	-4.58845	ENSRNOG00000028505	NA	NA
0.552599	6.12627	1.26308	0.224816	0.999831	-4.54301	ENSRNOG00000052051	Slc24a1	solute carrier family 24 member 1 [Source:RGD Symbol;Acc:620080]
0.551649	3.5599	2.49172	0.0241834	0.999831	-4.02996	ENSRNOG00000053979	Egf	epidermal growth factor [Source:RGD Symbol;Acc:2542]
0.551471	3.00925	1.9882	0.0643345	0.999831	-4.17159	ENSRNOG00000017210	Slc22a23	solute carrier family 22, member 23 [Source:RGD Symbol;Acc:620302]
0.547117	6.61211	0.855001	0.405283	0.999831	-4.77286	ENSRNOG00000007894	Mpdz	multiple PDZ domain crumbs cell polarity complex component [Source:RGD Symbol;Acc:3105]
0.546506	5.17414	0.907529	0.377712	0.999831	-4.7422	ENSRNOG00000018194	Srrm1	serine and arginine repetitive matrix 1 [Source:RGD Symbol;Acc:1311258]
0.546469	0.513481	0.469149	0.645349	0.999831	-4.60098	ENSRNOG00000016411	Rps12	ribosomal protein S12 [Source:RGD Symbol;Acc:62024]
0.546137	1.26606	1.48655	0.156743	0.999831	-4.54577	ENSRNOG00000036683	Sirt7	sirtuin 7 [Source:RGD Symbol;Acc:1305876]
0.545489	1.46306	1.1272	0.276425	0.999831	-4.58475	ENSRNOG00000053557	NA	NA
0.545452	0.933946	1.01103	0.32718	0.999831	-4.59527	ENSRNOG00000020061	Tmem198	transmembrane protein 198 [Source:RGD Symbol;Acc:2319152]
0.54144	5.10301	2.51757	0.0229607	0.999831	-3.60394	ENSRNOG00000025285	Gfm2	GTP dependent ribosome recycling factor mitochondrial 2 [Source:RGD Symbol;Acc:1309854]
0.541292	1.16962	1.3133	0.207769	0.999831	-4.57526	ENSRNOG00000019629	Lamp1	lysosomal-associated membrane protein 1 [Source:RGD Symbol;Acc:2989]
0.538836	1.40029	1.28042	0.218811	0.999831	-4.57682	ENSRNOG00000037437	Golga3	golgin A3 [Source:RGD Symbol;Acc:1305262]
0.537745	3.57416	1.77719	0.0947196	0.999831	-4.31473	ENSRNOG00000056756	Actn1	actinin, alpha 1 [Source:RGD Symbol;Acc:70907]
0.537337	1.6407	1.46153	0.163403	0.999831	-4.51026	ENSRNOG00000006118	Klf10	KLF transcription factor 10 [Source:RGD Symbol;Acc:621652]
0.534842	1.16164	1.198	0.248516	0.999831	-4.58522	ENSRNOG00000007439	Unc13d	unc-13 homolog D [Source:RGD Symbol;Acc:628593]
0.533598	1.73368	1.16353	0.261825	0.999831	-4.58126	ENSRNOG00000020531	Fen1	flap structure-specific endonuclease 1 [Source:RGD Symbol;Acc:621821]
0.532419	1.02734	1.18263	0.254385	0.999831	-4.58529	ENSRNOG00000001232	Slc19a1	solute carrier family 19 member 1 [Source:RGD Symbol;Acc:3695]
0.531932	4.18145	2.3869	0.0298053	0.999831	-3.85204	ENSRNOG00000011151	Tenm4	teneurin transmembrane protein 4 [Source:RGD Symbol;Acc:1304658]
0.529228	1.19344	1.12159	0.278735	0.999831	-4.58971	ENSRNOG00000047796	NA	NA
0.52854	1.03108	0.32696	0.747974	0.999831	-4.60312	ENSRNOG00000018117	Ndufv1	NADH:ubiquinone oxidoreductase core subunit V1 [Source:RGD Symbol;Acc:1359247]
0.528424	0.86339	1.35057	0.195791	0.999831	-4.57728	ENSRNOG00000048580	Trip6	thyroid hormone receptor interactor 6 [Source:RGD Symbol;Acc:1583180]
0.525145	2.44617	2.43306	0.0271921	0.999831	-4.27556	ENSRNOG00000008966	Slco5a1	solute carrier organic anion transporter family, member 5A1 [Source:RGD Symbol;Acc:1307132]
0.524739	2.70578	2.20893	0.0422497	0.999831	-4.35597	ENSRNOG00000030091	Dusp14	dual specificity phosphatase 14 [Source:RGD Symbol;Acc:1307415]
0.523917	0.80458	1.0141	0.32576	0.999831	-4.59501	ENSRNOG00000051319	AABR07038863.2	None
0.520222	2.31481	1.63154	0.122472	0.999831	-4.50698	ENSRNOG00000008270	Cntrob	centrobin, centriole duplication and spindle assembly protein [Source:RGD Symbol;Acc:1307488]
0.519952	6.19873	2.13786	0.0484534	0.999831	-3.89987	ENSRNOG00000048226	Hmgn1	high mobility group nucleosome binding domain 1 [Source:RGD Symbol;Acc:1307761]
0.518283	1.28298	1.25025	0.229342	0.999831	-4.57824	ENSRNOG00000026985	Phldb1	pleckstrin homology-like domain, family B, member 1 [Source:RGD Symbol;Acc:620878]
0.513657	-0.0930732	0.177507	0.861358	0.999831	-4.60072	ENSRNOG00000015295	Ctdsp1	CTD small phosphatase 1 [Source:RGD Symbol;Acc:1305629]
0.512022	4.40554	1.45564	0.165003	0.999831	-4.43944	ENSRNOG00000025000	Cep104	centrosomal protein 104 [Source:RGD Symbol;Acc:708505]
0.51164	4.82806	3.30805	0.0044877	0.999831	-3.12624	ENSRNOG00000001681	Vps26c	VPS26 endosomal protein sorting factor C [Source:RGD Symbol;Acc:1306879]
0.511433	3.32177	1.25706	0.226931	0.999831	-4.53938	ENSRNOG00000014997	Igf2r	insulin-like growth factor 2 receptor [Source:RGD Symbol;Acc:2871]
0.510784	2.9826	2.33011	0.0333437	0.999831	-4.1765	ENSRNOG00000037871	Sfxn5	sideroflexin 5 [Source:RGD Symbol;Acc:628706]
0.509093	3.19928	1.51413	0.149667	0.999831	-4.47637	ENSRNOG00000030404	Arrb1	arrestin, beta 1 [Source:RGD Symbol;Acc:2156]
0.50905	5.44966	1.38857	0.184162	0.999831	-4.47206	ENSRNOG00000019333	Hipk1	homeodomain interacting protein kinase 1 [Source:RGD Symbol;Acc:1304941]
0.504646	0.664359	0.634062	0.53508	0.999831	-4.60923	ENSRNOG00000047061	Zfp773-ps1	zinc finger protein 773, pseudogene 1 [Source:RGD Symbol;Acc:1563793]
0.503967	3.21682	2.17968	0.0447083	0.999831	-4.15828	ENSRNOG00000004090	LOC100361025	protein arginine methyltransferase 1-like [Source:RGD Symbol;Acc:2320935]
0.503881	-0.172909	0.364386	0.720383	0.999831	-4.60116	ENSRNOG00000019459	Oaz1	ornithine decarboxylase antizyme 1 [Source:RGD Symbol;Acc:3219]
0.501266	1.78977	0.871944	0.396249	0.999831	-4.60774	ENSRNOG00000016145	Strn4	striatin 4 [Source:RGD Symbol;Acc:1307030]
0.500821	-1.45752	0.143929	0.887369	0.999831	-4.59915	ENSRNOG00000017253	Ccdc107	coiled-coil domain containing 107 [Source:RGD Symbol;Acc:1560252]
0.498977	0.972065	0.805208	0.432607	0.999831	-4.60345	ENSRNOG00000000566	Pcbd1	pterin-4 alpha-carbinolamine dehydratase 1 [Source:RGD Symbol;Acc:3263]
0.498955	0.537852	0.172107	0.86553	0.999831	-4.59745	ENSRNOG00000060617	Uty	ubiquitously transcribed tetratricopeptide repeat containing, Y-linked [Source:RGD Symbol;Acc:1565481]
0.498592	1.49531	0.901577	0.380771	0.999831	-4.60653	ENSRNOG00000028404	Ppp1r1b	protein phosphatase 1, regulatory (inhibitor) subunit 1B [Source:RGD Symbol;Acc:621859]
0.497632	1.88454	0.695083	0.497063	0.999831	-4.62002	ENSRNOG00000000490	Rps10l1	ribosomal protein S10-like 1 [Source:RGD Symbol;Acc:2323006]
0.496728	1.50581	1.01953	0.323252	0.999831	-4.59614	ENSRNOG00000000431	Atf6b	activating transcription factor 6 beta [Source:RGD Symbol;Acc:1303317]
0.494269	2.51095	1.70405	0.107883	0.999831	-4.46984	ENSRNOG00000019710	Tm9sf1	transmembrane 9 superfamily member 1 [Source:RGD Symbol;Acc:1307085]
0.494141	3.64065	1.87226	0.079729	0.999831	-4.22333	ENSRNOG00000008859	Tank	TRAF family member-associated NFKB activator [Source:RGD Symbol;Acc:628859]
0.492747	2.94831	1.95473	0.0684782	0.999831	-4.34338	ENSRNOG00000024061	Rarb	retinoic acid receptor, beta [Source:RGD Symbol;Acc:3535]
0.491989	5.18418	2.18831	0.0439692	0.999831	-3.86617	ENSRNOG00000000048	Gak	cyclin G associated kinase [Source:RGD Symbol;Acc:621589]
0.491987	5.5545	3.77851	0.00166867	0.999831	-2.49094	ENSRNOG00000024934	Npat	nuclear protein, co-activator of histone transcription [Source:RGD Symbol;Acc:1311947]
0.491928	2.10546	0.938101	0.362262	0.999831	-4.60686	ENSRNOG00000036688	Arhgdia	Rho GDP dissociation inhibitor alpha [Source:RGD Symbol;Acc:1359547]
0.491889	2.09183	1.09984	0.287818	0.999831	-4.58616	ENSRNOG00000016327	Mcee	methylmalonyl CoA epimerase [Source:RGD Symbol;Acc:1309966]
0.489342	4.87988	2.81969	0.0124105	0.999831	-3.46677	ENSRNOG00000009039	Trappc12	trafficking protein particle complex subunit 12 [Source:RGD Symbol;Acc:1566054]
0.488853	3.07489	1.84441	0.0838863	0.999831	-4.30828	ENSRNOG00000051706	Tep1	telomerase associated protein 1 [Source:RGD Symbol;Acc:3869]
0.487093	0.194802	0.899334	0.381928	0.999831	-4.59844	ENSRNOG00000019163	Syt6	synaptotagmin 6 [Source:RGD Symbol;Acc:62012]
0.485839	2.42399	3.25161	0.0050518	0.999831	-4.10168	ENSRNOG00000008086	Dpf3	double PHD fingers 3 [Source:RGD Symbol;Acc:1309052]
0.485671	1.41828	1.16323	0.261941	0.999831	-4.57641	ENSRNOG00000006952	Prex1	phosphatidylinositol-3,4,5-trisphosphate-dependent Rac exchange factor 1 [Source:RGD Symbol;Acc:1306534]
0.485058	2.01189	0.927681	0.367478	0.999831	-4.60461	ENSRNOG00000014690	Pigt	phosphatidylinositol glycan anchor biosynthesis, class T [Source:RGD Symbol;Acc:1307156]
0.484696	2.19936	1.55234	0.140307	0.999831	-4.50801	ENSRNOG00000006612	NA	NA
0.480954	5.39167	1.54013	0.143244	0.999831	-4.37293	ENSRNOG00000000657	Nek7	NIMA-related kinase 7 [Source:RGD Symbol;Acc:1311160]
0.480788	0.781848	0.791721	0.440206	0.999831	-4.60127	ENSRNOG00000016913	Stk36	serine/threonine kinase 36 [Source:RGD Symbol;Acc:1307318]
0.47966	1.03945	0.956501	0.353175	0.999831	-4.59823	ENSRNOG00000014302	Dlgap3	DLG associated protein 3 [Source:RGD Symbol;Acc:708349]
0.479656	3.07579	0.973275	0.34503	0.999831	-4.61627	ENSRNOG00000060707	Atg2a	autophagy related 2A [Source:RGD Symbol;Acc:1589890]
0.477422	2.06536	1.11147	0.282935	0.999831	-4.58522	ENSRNOG00000007684	Zc3h3	zinc finger CCCH type containing 3 [Source:RGD Symbol;Acc:1307276]
0.475107	1.5744	1.49506	0.154532	0.999831	-4.53929	ENSRNOG00000037340	Epha10	EPH receptor A10 [Source:RGD Symbol;Acc:1562679]
0.474949	2.90338	1.50047	0.153139	0.999831	-4.43826	ENSRNOG00000058664	Usp9y	ubiquitin specific peptidase 9, Y-linked [Source:RGD Symbol;Acc:9087771]
0.473476	1.07487	0.340993	0.737585	0.999831	-4.60804	ENSRNOG00000021149	Ush1c	USH1 protein network component harmonin [Source:RGD Symbol;Acc:1303329]
0.472173	1.80715	1.40121	0.180417	0.999831	-4.54633	ENSRNOG00000011781	Oplah	5-oxoprolinase (ATP-hydrolysing) [Source:RGD Symbol;Acc:620956]
0.470067	1.17725	1.48546	0.15703	0.999831	-4.55776	ENSRNOG00000037957	Aifm3	apoptosis inducing factor, mitochondria associated 3 [Source:RGD Symbol;Acc:1306028]
0.469879	2.5306	0.765425	0.45526	0.999831	-4.63246	ENSRNOG00000036663	Foxk2	forkhead box K2 [Source:RGD Symbol;Acc:1305408]
0.469824	3.02192	1.40018	0.18072	0.999831	-4.493	ENSRNOG00000000221	Abhd5	abhydrolase domain containing 5, lysophosphatidic acid acyltransferase [Source:RGD Symbol;Acc:1303237]
0.467382	2.50101	1.24668	0.230616	0.999831	-4.54776	ENSRNOG00000051720	Nudc	nuclear distribution C, dynein complex regulator [Source:RGD Symbol;Acc:3215]
0.467334	7.03534	0.89935	0.38192	0.999831	-4.77661	ENSRNOG00000052968	Hnrnpa3	heterogeneous nuclear ribonucleoprotein A3 [Source:RGD Symbol;Acc:727807]
0.464946	1.0371	0.942743	0.359954	0.999831	-4.5988	ENSRNOG00000019215	NA	NA
0.464637	0.788626	0.220584	0.828231	0.999831	-4.59976	ENSRNOG00000008619	Agtrap	angiotensin II receptor-associated protein [Source:RGD Symbol;Acc:1359346]
0.46425	4.6423	1.81777	0.0880403	0.999831	-4.2172	ENSRNOG00000007387	Per1	period circadian regulator 1 [Source:RGD Symbol;Acc:727863]
0.464232	4.35364	1.42929	0.172323	0.999831	-4.45336	ENSRNOG00000018898	Mpi	mannose phosphate isomerase [Source:RGD Symbol;Acc:3107]
0.464216	2.80858	1.51228	0.150133	0.999831	-4.49204	ENSRNOG00000000474	Rgl2	ral guanine nucleotide dissociation stimulator-like 2 [Source:RGD Symbol;Acc:1302985]
0.463133	3.35707	1.84845	0.083272	0.999831	-4.24402	ENSRNOG00000046469	Zfp300	zinc finger protein 300 [Source:RGD Symbol;Acc:2321626]
0.461298	3.56552	1.70736	0.107254	0.999831	-4.35063	ENSRNOG00000003849	Stx8	syntaxin 8 [Source:RGD Symbol;Acc:61917]
0.460027	4.02663	1.47794	0.15901	0.999831	-4.45597	ENSRNOG00000021051	Cyth2	cytohesin 2 [Source:RGD Symbol;Acc:620398]
0.457662	1.12964	0.865839	0.399488	0.999831	-4.60225	ENSRNOG00000018101	Klc3	kinesin light chain 3 [Source:RGD Symbol;Acc:621432]
0.456264	2.21967	0.769004	0.453193	0.999831	-4.62227	ENSRNOG00000009333	Osgep	O-sialoglycoprotein endopeptidase [Source:RGD Symbol;Acc:1308578]
0.45596	1.93512	2.05347	0.0569021	0.999831	-4.32321	ENSRNOG00000013770	Folh1	folate hydrolase 1 [Source:RGD Symbol;Acc:70963]
0.455233	1.80101	1.00631	0.329374	0.999831	-4.5968	ENSRNOG00000019438	Rnf31	ring finger protein 31 [Source:RGD Symbol;Acc:1305513]
0.45487	0.739824	0.955419	0.353705	0.999831	-4.5999	ENSRNOG00000001888	Arvcf	ARVCF, delta catenin family member [Source:RGD Symbol;Acc:1306655]
0.454777	5.59256	3.44819	0.00334291	0.999831	-2.7811	ENSRNOG00000022372	Kdm1a	lysine demethylase 1A [Source:RGD Symbol;Acc:1562975]
0.454704	3.05103	1.74381	0.100542	0.999831	-4.37057	ENSRNOG00000004104	Zkscan7	zinc finger with KRAB and SCAN domains 7 [Source:RGD Symbol;Acc:1305242]
0.454135	2.81287	1.96724	0.0669019	0.999831	-4.34598	ENSRNOG00000011211	Pex5l	peroxisomal biogenesis factor 5-like [Source:RGD Symbol;Acc:708407]
0.453993	2.68402	1.0259	0.320334	0.999831	-4.5961	ENSRNOG00000017408	Fhip1b	FHF complex subunit HOOK interacting protein 1B [Source:RGD Symbol;Acc:1359585]
0.453925	2.26357	2.22195	0.0411962	0.999831	-4.27136	ENSRNOG00000024945	Dusp18	dual specificity phosphatase 18 [Source:RGD Symbol;Acc:1306929]
0.453684	4.32718	2.06126	0.0560687	0.999831	-4.0361	ENSRNOG00000007302	Fbn1	fibrillin 1 [Source:RGD Symbol;Acc:620908]
0.453234	2.34268	0.948389	0.357161	0.999831	-4.60662	ENSRNOG00000020357	Msto1	misato mitochondrial distribution and morphology regulator 1 [Source:RGD Symbol;Acc:1306110]
0.453	5.08667	1.1323	0.27434	0.999831	-4.63473	ENSRNOG00000014066	Jade1	jade family PHD finger 1 [Source:RGD Symbol;Acc:1306920]
0.452361	2.68812	1.4824	0.157833	0.999831	-4.50147	ENSRNOG00000014338	Slc25a25	solute carrier family 25 member 25 [Source:RGD Symbol;Acc:628666]
0.452252	5.28085	1.88913	0.0773017	0.999831	-4.10636	ENSRNOG00000003553	Efemp1	EGF containing fibulin extracellular matrix protein 1 [Source:RGD Symbol;Acc:1308528]
0.449674	1.45706	0.800424	0.435293	0.999831	-4.61242	ENSRNOG00000048394	Zfp560	zinc finger protein 560 [Source:RGD Symbol;Acc:2323078]
0.449248	2.10457	1.55805	0.138952	0.999831	-4.47953	ENSRNOG00000024352	Tyw1	tRNA-yW synthesizing protein 1 homolog [Source:RGD Symbol;Acc:1310420]
0.448532	0.926367	0.940271	0.361182	0.999831	-4.59851	ENSRNOG00000020773	Map3k11	mitogen-activated protein kinase kinase kinase 11 [Source:RGD Symbol;Acc:1359261]
0.447799	2.18967	1.01821	0.32386	0.999831	-4.59733	ENSRNOG00000013895	NA	NA
0.44779	3.37612	1.28505	0.217229	0.999831	-4.53525	ENSRNOG00000031965	Impdh2	inosine monophosphate dehydrogenase 2 [Source:RGD Symbol;Acc:735092]
0.446997	0.406557	0.583375	0.567846	0.999831	-4.60478	ENSRNOG00000017283	Kcnt1	potassium sodium-activated channel subfamily T member 1 [Source:RGD Symbol;Acc:621106]
0.446304	3.06238	0.352945	0.728777	0.999831	-4.61948	ENSRNOG00000014637	Atxn10	ataxin 10 [Source:RGD Symbol;Acc:621813]
0.446065	0.493341	0.772261	0.451316	0.999831	-4.60291	ENSRNOG00000001325	Il3ra	interleukin 3 receptor subunit alpha [Source:RGD Symbol;Acc:628728]
0.446064	3.28394	1.6339	0.121973	0.999831	-4.4106	ENSRNOG00000049862	Rnf157	ring finger protein 157 [Source:RGD Symbol;Acc:1591154]
0.444195	1.77522	2.02483	0.0600612	0.999831	-4.42806	ENSRNOG00000010158	Magel2	MAGE family member L2 [Source:RGD Symbol;Acc:1583615]
0.443984	0.550663	0.898609	0.382303	0.999831	-4.60063	ENSRNOG00000020864	Kirrel2	kirre like nephrin family adhesion molecule 2 [Source:RGD Symbol;Acc:1308456]
0.442265	4.04823	1.60123	0.129056	0.999831	-4.38865	ENSRNOG00000012357	Unc45a	unc-45 myosin chaperone A [Source:RGD Symbol;Acc:1305357]
0.441671	2.53954	1.44931	0.166739	0.999831	-4.51125	ENSRNOG00000000421	Skic2	SKI2 subunit of superkiller complex [Source:RGD Symbol;Acc:1303059]
0.440584	4.66004	0.911709	0.375573	0.999831	-4.6984	ENSRNOG00000015288	Dip2c	disco-interacting protein 2 homolog C [Source:RGD Symbol;Acc:1560155]
0.440374	0.670631	1.02921	0.318824	0.999831	-4.59433	ENSRNOG00000002890	Slc9c2	solute carrier family 9, member C2 (putative) [Source:RGD Symbol;Acc:1565820]
0.43994	2.53649	0.739544	0.470384	0.999831	-4.64038	ENSRNOG00000018840	Rnf40	ring finger protein 40 [Source:RGD Symbol;Acc:628638]
0.438001	3.03347	0.805034	0.432705	0.999831	-4.62732	ENSRNOG00000016794	Phyhd1	phytanoyl-CoA dioxygenase domain containing 1 [Source:RGD Symbol;Acc:1310377]
0.43656	0.998159	0.332849	0.743608	0.999831	-4.60573	ENSRNOG00000011553	Actl6a	actin-like 6A [Source:RGD Symbol;Acc:1307747]
0.43605	4.37074	2.2274	0.040763	0.999831	-3.90878	ENSRNOG00000008671	Dct	dopachrome tautomerase [Source:RGD Symbol;Acc:1564975]
0.436025	3.63892	1.00896	0.32814	0.999831	-4.66849	ENSRNOG00000024114	Zdbf2	zinc finger, DBF-type containing 2 [Source:RGD Symbol;Acc:1560005]
0.43574	2.07185	1.22281	0.239263	0.999831	-4.56496	ENSRNOG00000003455	Zfp13	zinc finger protein 13 [Source:RGD Symbol;Acc:1304577]
0.435234	2.63827	0.92209	0.370298	0.999831	-4.60806	ENSRNOG00000031789	Rangap1	RAN GTPase activating protein 1 [Source:RGD Symbol;Acc:1310380]
0.435038	1.41159	1.04351	0.312361	0.999831	-4.5934	ENSRNOG00000024867	Eme2	essential meiotic structure-specific endonuclease subunit 2 [Source:RGD Symbol;Acc:1304924]
0.434064	-0.439624	0.199682	0.844267	0.999831	-4.60074	ENSRNOG00000020247	Cnih2	cornichon family AMPA receptor auxiliary protein 2 [Source:RGD Symbol;Acc:1304930]
0.433727	4.9424	1.8434	0.0840399	0.999831	-4.16495	ENSRNOG00000016388	Sphkap	SPHK1 interactor, AKAP domain containing [Source:RGD Symbol;Acc:1311951]
0.433069	-0.843588	0.203201	0.841562	0.999831	-4.60071	ENSRNOG00000010196	Glb1	galactosidase, beta 1 [Source:RGD Symbol;Acc:1597145]
0.432762	6.50382	1.22066	0.240056	0.999831	-4.57641	ENSRNOG00000033262	Reep6	receptor accessory protein 6 [Source:RGD Symbol;Acc:1309508]
0.430431	1.16832	1.02168	0.322266	0.999831	-4.59479	ENSRNOG00000028837	LOC120093525	myosin light chain 6B [Source:RGD Symbol;Acc:41207417]
0.429755	1.40723	0.94195	0.360348	0.999831	-4.60054	ENSRNOG00000019575	Rell2	RELT-like 2 [Source:RGD Symbol;Acc:1305276]
0.429569	2.13259	0.97739	0.343052	0.999831	-4.61665	ENSRNOG00000004040	Abca8	ATP binding cassette subfamily A member 8 [Source:RGD Symbol;Acc:1307069]
0.42905	1.72437	1.52601	0.146702	0.999831	-4.53242	ENSRNOG00000007752	Zmynd19	zinc finger, MYND-type containing 19 [Source:RGD Symbol;Acc:735079]
0.428472	1.53018	0.65053	0.524664	0.999831	-4.61211	ENSRNOG00000047578	Ccdc28b	coiled coil domain containing 28B [Source:RGD Symbol;Acc:1583447]
0.428387	5.8946	1.59761	0.129861	0.999831	-4.3246	ENSRNOG00000046950	NA	NA
0.42688	3.11541	1.96809	0.0667964	0.999831	-4.22135	ENSRNOG00000006841	Ano4	anoctamin 4 [Source:RGD Symbol;Acc:1310252]
0.42685	6.87968	2.23155	0.0404352	0.999831	-3.77593	ENSRNOG00000037483	Ep400	E1A binding protein p400 [Source:RGD Symbol;Acc:1304733]
0.426802	0.985976	0.856991	0.404215	0.999831	-4.61042	ENSRNOG00000014350	Ccn1	cellular communication network factor 1 [Source:RGD Symbol;Acc:620763]
0.42673	1.94086	2.11742	0.0503862	0.999831	-4.39453	ENSRNOG00000013945	Itpkc	inositol-trisphosphate 3-kinase C [Source:RGD Symbol;Acc:631336]
0.426561	2.21149	2.98599	0.00879746	0.999831	-4.09286	ENSRNOG00000007943	Gsdma	gasdermin A [Source:RGD Symbol;Acc:1592062]
0.425895	3.70151	1.29805	0.212832	0.999831	-4.5208	ENSRNOG00000016137	Rad23b	RAD23 homolog B, nucleotide excision repair protein [Source:RGD Symbol;Acc:1562958]
0.425891	3.20951	0.814966	0.427162	0.999831	-4.64751	ENSRNOG00000018454	Apoe	apolipoprotein E [Source:RGD Symbol;Acc:2138]
0.425314	0.658425	0.248952	0.806593	0.999831	-4.60233	ENSRNOG00000049944	Slc25a22	solute carrier family 25 member 22 [Source:RGD Symbol;Acc:1307826]
0.424796	5.08071	1.61924	0.125109	0.999831	-4.32607	ENSRNOG00000054557	Lsm14b	LSM family member 14B [Source:RGD Symbol;Acc:1563798]
0.42362	5.30419	1.79302	0.0920626	0.999831	-4.18413	ENSRNOG00000007100	Ccdc136	coiled-coil domain containing 136 [Source:RGD Symbol;Acc:1564459]
0.422616	2.94495	1.28354	0.217743	0.999831	-4.53736	ENSRNOG00000045843	Rusc2	RUN and SH3 domain containing 2 [Source:RGD Symbol;Acc:1592688]
0.422379	-0.289078	0.240218	0.813239	0.999831	-4.60392	ENSRNOG00000024322	Shroom2	shroom family member 2 [Source:RGD Symbol;Acc:1565163]
0.422264	3.62083	2.31547	0.034318	0.999831	-4.00364	ENSRNOG00000037556	Zfp420	zinc finger protein 420 [Source:RGD Symbol;Acc:2323829]
0.421563	1.25701	0.798375	0.436447	0.999831	-4.60511	ENSRNOG00000025497	Tmem249	transmembrane protein 249 [Source:RGD Symbol;Acc:6496784]
0.421311	3.02826	1.6726	0.114015	0.999831	-4.43957	ENSRNOG00000004668	Slc25a35	solute carrier family 25, member 35 [Source:RGD Symbol;Acc:1598229]
0.420817	5.96746	3.12029	0.00664996	0.999831	-2.98821	ENSRNOG00000006663	Usp2	ubiquitin specific peptidase 2 [Source:RGD Symbol;Acc:621073]
0.420803	1.44712	1.41661	0.17594	0.999831	-4.55546	ENSRNOG00000015051	Golga7b	golgin A7 family, member B [Source:RGD Symbol;Acc:1583839]
0.420684	1.90978	1.07504	0.298441	0.999831	-4.59033	ENSRNOG00000016161	Lman2	lectin, mannose-binding 2 [Source:RGD Symbol;Acc:1308965]
0.420041	2.65877	2.04304	0.0580345	0.999831	-4.27034	ENSRNOG00000028677	LOC361346	similar to chromosome 18 open reading frame 54 [Source:RGD Symbol;Acc:1563837]
0.419617	2.30063	1.17398	0.257733	0.999831	-4.57597	ENSRNOG00000021899	Tmem115	transmembrane protein 115 [Source:RGD Symbol;Acc:1310540]
0.419371	3.48464	3.47576	0.00315459	0.999831	-3.33649	ENSRNOG00000003537	Spta1	spectrin, alpha, erythrocytic 1 [Source:RGD Symbol;Acc:1305194]
0.418649	1.51903	2.15579	0.0468132	0.999831	-4.41197	ENSRNOG00000038427	C14h4orf50	similar to human chromosome 4 open reading frame 50 [Source:RGD Symbol;Acc:7596857]
0.418588	3.68795	1.51102	0.150454	0.999831	-4.43063	ENSRNOG00000005987	Suox	sulfite oxidase [Source:RGD Symbol;Acc:619994]
0.418359	2.54179	1.52512	0.146923	0.999831	-4.4917	ENSRNOG00000059507	Lamc3	laminin subunit gamma 3 [Source:RGD Symbol;Acc:1309399]
0.418104	4.54789	1.36083	0.192594	0.999831	-4.48789	ENSRNOG00000049128	Nktr	natural killer cell triggering receptor [Source:RGD Symbol;Acc:2321593]
0.418097	4.16496	2.61507	0.0188572	0.999831	-3.75001	ENSRNOG00000003673	Nup85	nucleoporin 85 [Source:RGD Symbol;Acc:1311942]
0.417236	2.8313	1.40261	0.180006	0.999831	-4.51242	ENSRNOG00000017917	Cdhr2	cadherin-related family member 2 [Source:RGD Symbol;Acc:1560576]
0.415523	4.17009	1.68016	0.112514	0.999831	-4.30573	ENSRNOG00000005865	Itprid2	ITPR interacting domain containing 2 [Source:RGD Symbol;Acc:1310767]
0.415257	0.953187	0.613122	0.548489	0.999831	-4.60808	ENSRNOG00000006589	Mif	macrophage migration inhibitory factor [Source:RGD Symbol;Acc:621163]
0.414875	4.77807	1.1131	0.282253	0.999831	-4.61255	ENSRNOG00000001448	Hip1	huntingtin interacting protein 1 [Source:RGD Symbol;Acc:620305]
0.414145	4.63985	1.60304	0.128654	0.999831	-4.3508	ENSRNOG00000004588	Zbed4	zinc finger, BED-type containing 4 [Source:RGD Symbol;Acc:1305949]
0.413936	3.70178	2.05061	0.0572108	0.999831	-4.16264	ENSRNOG00000023107	Yeats2	YEATS domain containing 2 [Source:RGD Symbol;Acc:1566176]
0.413875	4.35866	1.70849	0.107042	0.999831	-4.30282	ENSRNOG00000012121	Sdf2	stromal cell derived factor 2 [Source:RGD Symbol;Acc:1307274]
0.412359	4.80491	0.843275	0.411614	0.999831	-4.69371	ENSRNOG00000016505	Fam169a	family with sequence similarity 169, member A [Source:RGD Symbol;Acc:1590893]
0.410971	3.56575	1.68946	0.110692	0.999831	-4.31711	ENSRNOG00000008015	Fos	Fos proto-oncogene, AP-1 transcription factor subunit [Source:RGD Symbol;Acc:2626]
0.410366	4.39424	0.977827	0.342842	0.999831	-4.66457	ENSRNOG00000019832	Bbs1	Bardet-Biedl syndrome 1 [Source:RGD Symbol;Acc:1307581]
0.410025	5.94585	1.70613	0.107487	0.999831	-4.24552	ENSRNOG00000025459	Mars1	methionyl-tRNA synthetase 1 [Source:RGD Symbol;Acc:1305321]
0.409869	3.04608	1.93728	0.0707321	0.999831	-4.32032	ENSRNOG00000003504	Thsd8	thrombospondin type 1 domain containing 8 [Source:RGD Symbol;Acc:41288257]
0.408647	2.27952	2.51377	0.0231368	0.999831	-4.2104	ENSRNOG00000010065	Dgkh	diacylglycerol kinase, eta [Source:RGD Symbol;Acc:1561955]
0.408451	2.55986	0.753557	0.462158	0.999831	-4.63866	ENSRNOG00000058359	Fkbp8	FKBP prolyl isomerase 8 [Source:RGD Symbol;Acc:1308670]
0.407862	2.68398	1.3608	0.192604	0.999831	-4.52531	ENSRNOG00000015675	Nell1	neural EGFL like 1 [Source:RGD Symbol;Acc:620998]
0.406982	2.60399	1.47372	0.160129	0.999831	-4.48687	ENSRNOG00000024677	Arhgap33	Rho GTPase activating protein 33 [Source:RGD Symbol;Acc:2318374]
0.406592	4.04921	1.18042	0.255238	0.999831	-4.57192	ENSRNOG00000024657	Mfsd4a	major facilitator superfamily domain containing 4A [Source:RGD Symbol;Acc:1566090]
0.405982	0.72951	1.04637	0.311077	0.999831	-4.59323	ENSRNOG00000054765	Renbp	renin binding protein [Source:RGD Symbol;Acc:621688]
0.40596	2.73657	1.77358	0.0953347	0.999831	-4.41646	ENSRNOG00000022742	Zfp954	zinc finger protein 954 [Source:RGD Symbol;Acc:1561308]
0.405918	2.72266	0.901967	0.38057	0.999831	-4.61422	ENSRNOG00000004834	Llgl2	LLGL scribble cell polarity complex component 2 [Source:RGD Symbol;Acc:1560307]
0.405685	3.49641	1.29483	0.213913	0.999831	-4.52282	ENSRNOG00000028521	Plekhm1	pleckstrin homology and RUN domain containing M1 [Source:RGD Symbol;Acc:1308010]
0.404603	1.26944	0.728131	0.477148	0.999831	-4.61198	ENSRNOG00000061376	Psca	prostate stem cell antigen [Source:RGD Symbol;Acc:1594221]
0.404065	1.52674	0.976317	0.343567	0.999831	-4.59808	ENSRNOG00000023348	Tbc1d2	TBC1 domain family, member 2 [Source:RGD Symbol;Acc:1306860]
0.404033	3.15466	0.898616	0.382299	0.999831	-4.62718	ENSRNOG00000039807	Fam193b	family with sequence similarity 193, member B [Source:RGD Symbol;Acc:1562335]
0.403705	4.90368	1.61645	0.125712	0.999831	-4.33113	ENSRNOG00000018242	Camkk1	calcium/calmodulin-dependent protein kinase kinase 1 [Source:RGD Symbol;Acc:62023]
0.403702	0.972146	0.348833	0.731803	0.999831	-4.60513	ENSRNOG00000033024	LOC100910017	60S ribosomal protein L31-like [Source:RGD Symbol;Acc:6500827]
0.402964	2.70486	1.22145	0.239763	0.999831	-4.56589	ENSRNOG00000027331	Ppef1	protein phosphatase with EF-hand domain 1 [Source:RGD Symbol;Acc:1562772]
0.401331	2.26807	0.950399	0.356171	0.999831	-4.60393	ENSRNOG00000060530	Cdc34	cell division cycle 34, ubiqiutin conjugating enzyme [Source:RGD Symbol;Acc:1305411]
0.401103	4.56666	1.1437	0.26972	0.999831	-4.59596	ENSRNOG00000059880	Rubcn	rubicon autophagy regulator [Source:RGD Symbol;Acc:1305422]
0.399888	2.82358	1.09277	0.29082	0.999831	-4.58755	ENSRNOG00000038347	Usp21	ubiquitin specific peptidase 21 [Source:RGD Symbol;Acc:1588822]
0.399019	1.75434	1.73522	0.10209	0.999831	-4.4908	ENSRNOG00000002117	Barhl2	BarH-like homeobox 2 [Source:RGD Symbol;Acc:620726]
0.39897	1.58738	2.18548	0.0442109	0.999831	-4.36188	ENSRNOG00000046468	Ptgfr	prostaglandin F receptor [Source:RGD Symbol;Acc:3436]
0.398767	7.16764	2.68371	0.0163997	0.999831	-3.32974	ENSRNOG00000021317	Cct2	chaperonin containing TCP1 subunit 2 [Source:RGD Symbol;Acc:1359143]
0.398468	3.33468	1.38042	0.186606	0.999831	-4.50588	ENSRNOG00000045524	Slc39a3	solute carrier family 39 member 3 [Source:RGD Symbol;Acc:1310863]
0.398414	1.89408	1.32515	0.203898	0.999831	-4.55069	ENSRNOG00000050655	P4ha1	prolyl 4-hydroxylase subunit alpha 1 [Source:RGD Symbol;Acc:621000]
0.397305	3.44642	1.56303	0.13778	0.999831	-4.43099	ENSRNOG00000027569	Trappc9	trafficking protein particle complex subunit 9 [Source:RGD Symbol;Acc:1309461]
0.39718	0.788418	0.471384	0.643786	0.999831	-4.60199	ENSRNOG00000012528	Zfyve19	zinc finger FYVE-type containing 19 [Source:RGD Symbol;Acc:1561576]
0.396389	2.7815	2.16718	0.0457983	0.999831	-4.28462	ENSRNOG00000000466	Hsd17b8	hydroxysteroid (17-beta) dehydrogenase 8 [Source:RGD Symbol;Acc:1303158]
0.395475	1.94546	0.581204	0.569273	0.999831	-4.62743	ENSRNOG00000024603	Rps15	ribosomal protein S15 [Source:RGD Symbol;Acc:62026]
0.39542	3.11928	2.6245	0.0184997	0.999831	-4.00431	ENSRNOG00000021245	RGD1311739	similar to RIKEN cDNA 1700037H04 [Source:RGD Symbol;Acc:1311739]
0.395181	0.804899	0.819134	0.42485	0.999831	-4.60267	ENSRNOG00000018212	Abhd17a	abhydrolase domain containing 17A, depalmitoylase [Source:RGD Symbol;Acc:1359682]
0.39447	1.43419	1.00724	0.328944	0.999831	-4.5973	ENSRNOG00000059166	Ldb3	LIM domain binding 3 [Source:RGD Symbol;Acc:1564875]
0.394102	2.82244	1.44929	0.166743	0.999831	-4.51389	ENSRNOG00000046333	AABR07007032.1	actin-binding LIM protein 1 [Source:RGD Symbol;Acc:1565768]
0.393829	1.79886	1.09906	0.288149	0.999831	-4.5881	ENSRNOG00000046112	Dedd2	death effector domain containing 2 [Source:RGD Symbol;Acc:1588968]
0.393797	4.29893	2.00504	0.0623378	0.999831	-4.10107	ENSRNOG00000021173	Vps45	vacuolar protein sorting 45 homolog [Source:RGD Symbol;Acc:621267]
0.393736	2.34238	0.526122	0.606084	0.999831	-4.63391	ENSRNOG00000059894	Hmmr	hyaluronan-mediated motility receptor [Source:RGD Symbol;Acc:2805]
0.3931	1.83077	0.857031	0.404194	0.999831	-4.61593	ENSRNOG00000007090	Cacna1c	calcium voltage-gated channel subunit alpha1 C [Source:RGD Symbol;Acc:2245]
0.392029	0.945227	1.35825	0.193395	0.999831	-4.57239	ENSRNOG00000024954	Mgat5b	alpha-1,6-mannosylglycoprotein 6-beta-N-acetylglucosaminyltransferase B [Source:RGD Symbol;Acc:1305188]
0.391503	4.81034	2.38035	0.0301941	0.999831	-3.77108	ENSRNOG00000004155	Samd14	sterile alpha motif domain containing 14 [Source:RGD Symbol;Acc:1306138]
0.390264	6.56081	1.04356	0.312339	0.999831	-4.68691	ENSRNOG00000014623	Smurf2	SMAD specific E3 ubiquitin protein ligase 2 [Source:RGD Symbol;Acc:1310067]
0.390183	0.0928838	0.395553	0.697705	0.999831	-4.60095	ENSRNOG00000008415	Nab2	Ngfi-A binding protein 2 [Source:RGD Symbol;Acc:1311712]
0.389853	5.69297	1.24051	0.232827	0.999831	-4.56921	ENSRNOG00000058790	Fam120b	family with sequence similarity 120B [Source:RGD Symbol;Acc:1310304]
0.389722	2.0614	2.18091	0.0446023	0.999831	-4.37988	ENSRNOG00000025065	C5h1orf109	similar to human chromosome 1 open reading frame 109 [Source:RGD Symbol;Acc:1560436]
0.389506	1.47865	1.11475	0.281566	0.999831	-4.58794	ENSRNOG00000042702	Nipa1	NIPA magnesium transporter 1 [Source:RGD Symbol;Acc:1305401]
0.388852	0.883479	1.24286	0.231981	0.999831	-4.58296	ENSRNOG00000042607	Rhof	ras homolog family member F, filopodia associated [Source:RGD Symbol;Acc:1584038]
0.38778	1.85431	0.962579	0.350208	0.999831	-4.60378	ENSRNOG00000027742	Adamtsl2	ADAMTS-like 2 [Source:RGD Symbol;Acc:1305459]
0.387524	2.97321	1.00614	0.329455	0.999831	-4.6058	ENSRNOG00000022599	NA	NA
0.387251	6.66358	2.20808	0.0423196	0.999831	-3.79046	ENSRNOG00000048025	Cstf2	cleavage stimulation factor subunit 2 [Source:RGD Symbol;Acc:1596566]
0.386539	4.60668	1.69431	0.10975	0.999831	-4.291	ENSRNOG00000024025	Edc4	enhancer of mRNA decapping 4 [Source:RGD Symbol;Acc:1562009]
0.386411	2.54708	1.04967	0.309603	0.999831	-4.59421	ENSRNOG00000020602	Ndufa13	NADH:ubiquinone oxidoreductase subunit A13 [Source:RGD Symbol;Acc:6492821]
0.38641	2.83096	1.22174	0.239656	0.999831	-4.56147	ENSRNOG00000009422	Hmgcl	3-hydroxy-3-methylglutaryl-CoA lyase [Source:RGD Symbol;Acc:620554]
0.385387	1.65971	1.6902	0.110547	0.999831	-4.4911	ENSRNOG00000026087	Igfn1	immunoglobulin-like and fibronectin type III domain containing 1 [Source:RGD Symbol;Acc:1565384]
0.385254	5.18165	1.17285	0.258175	0.999831	-4.59689	ENSRNOG00000018627	Plekhb1	pleckstrin homology domain containing B1 [Source:RGD Symbol;Acc:621614]
0.384442	4.3222	1.1351	0.273199	0.999831	-4.593	ENSRNOG00000019551	Psmb6	proteasome 20S subunit beta 6 [Source:RGD Symbol;Acc:61881]
0.384401	2.13888	0.803938	0.433319	0.999831	-4.62213	ENSRNOG00000014316	Rapgef1	Rap guanine nucleotide exchange factor 1 [Source:RGD Symbol;Acc:619793]
0.384224	2.66408	1.71503	0.105811	0.999831	-4.4261	ENSRNOG00000020217	NA	NA
0.38224	3.46813	3.16665	0.00603573	0.999831	-3.54085	ENSRNOG00000020952	Cgn	cingulin [Source:RGD Symbol;Acc:1311992]
0.382214	2.77715	2.44269	0.0266754	0.999831	-4.07949	ENSRNOG00000016689	Fanci	FA complementation group I [Source:RGD Symbol;Acc:2321863]
0.381909	6.65303	1.94482	0.06975	0.999831	-4.03483	ENSRNOG00000017032	Atp5f1a	ATP synthase F1 subunit alpha [Source:RGD Symbol;Acc:619993]
0.381584	2.16171	1.30551	0.210343	0.999831	-4.55848	ENSRNOG00000003011	Gadd45gip1	GADD45G interacting protein 1 [Source:RGD Symbol;Acc:1309249]
0.380439	3.61024	2.45154	0.026208	0.999831	-3.94665	ENSRNOG00000016507	LOC687679	similar to small nuclear ribonucleoprotein polypeptide G [Source:RGD Symbol;Acc:1583028]
0.379621	2.23704	0.721478	0.481118	0.999831	-4.63269	ENSRNOG00000011573	Csad	cysteine sulfinic acid decarboxylase [Source:RGD Symbol;Acc:621030]
0.379211	2.43018	1.36462	0.191426	0.999831	-4.53625	ENSRNOG00000012481	Ppm1j	protein phosphatase, Mg2+/Mn2+ dependent, 1J [Source:RGD Symbol;Acc:1359104]
0.378611	2.08538	1.07688	0.297642	0.999831	-4.58983	ENSRNOG00000004245	Mgst3	microsomal glutathione S-transferase 3 [Source:RGD Symbol;Acc:1306373]
0.378607	1.86217	0.999753	0.332442	0.999831	-4.59801	ENSRNOG00000049911	Cbr1l2	carbonyl reductase 1 like 2 [Source:RGD Symbol;Acc:7631561]
0.378555	1.7824	1.43289	0.171309	0.999831	-4.52638	ENSRNOG00000045998	Sema6b	semaphorin 6B [Source:RGD Symbol;Acc:69278]
0.377749	2.43147	1.23124	0.23618	0.999831	-4.5554	ENSRNOG00000000697	Coro1c	coronin 1C [Source:RGD Symbol;Acc:1564490]
0.376797	5.91773	1.89216	0.0768738	0.999831	-4.08991	ENSRNOG00000046969	AABR07034438.1	UBX domain protein 7 [Source:MGI Symbol;Acc:MGI:2146388]
0.376752	3.60979	1.62187	0.124541	0.999831	-4.38181	ENSRNOG00000004316	Llph-ps1	LLP homolog, long-term synaptic facilitation factor, pseudogene 1 [Source:RGD Symbol;Acc:6489824]
0.376531	1.20119	0.617438	0.54571	0.999831	-4.61172	ENSRNOG00000007756	Atg101	autophagy related 101 [Source:RGD Symbol;Acc:1359310]
0.37651	3.73417	1.80317	0.0903943	0.999831	-4.30832	ENSRNOG00000008553	Mthfr	methylenetetrahydrofolate reductase [Source:RGD Symbol;Acc:1309952]
0.376135	1.61884	1.11532	0.281329	0.999831	-4.58712	ENSRNOG00000001265	Mad1l1	mitotic arrest deficient 1 like 1 [Source:RGD Symbol;Acc:1596881]
0.375509	3.51931	0.553552	0.587606	0.999831	-4.70648	ENSRNOG00000017318	Zfp322a	zinc finger protein 322a [Source:RGD Symbol;Acc:1594230]
0.375007	2.0527	1.10394	0.286087	0.999831	-4.58697	ENSRNOG00000009712	Gale	UDP-galactose-4-epimerase [Source:RGD Symbol;Acc:621493]
0.374382	1.74077	0.62853	0.538605	0.999831	-4.62696	ENSRNOG00000007604	Igsf8	immunoglobulin superfamily, member 8 [Source:RGD Symbol;Acc:1311500]
0.3738	1.61064	0.494749	0.627562	0.999831	-4.61436	ENSRNOG00000020032	Impdh1	inosine monophosphate dehydrogenase 1 [Source:RGD Symbol;Acc:1311108]
0.373788	3.06656	2.30942	0.0347284	0.999831	-4.0678	ENSRNOG00000006806	Setmar	SET domain and mariner transposase fusion gene [Source:RGD Symbol;Acc:1565882]
0.373427	1.63907	1.43573	0.170512	0.999831	-4.54556	ENSRNOG00000028168	Ankrd16	ankyrin repeat domain 16 [Source:RGD Symbol;Acc:1311405]
0.372943	2.7582	1.11272	0.282413	0.999831	-4.5837	ENSRNOG00000000175	Mier2	MIER family member 2 [Source:RGD Symbol;Acc:1307278]
0.37154	3.86858	1.89983	0.0757961	0.999831	-4.21778	ENSRNOG00000056647	Ascc1	activating signal cointegrator 1 complex subunit 1 [Source:RGD Symbol;Acc:1359255]
0.370831	3.26414	2.39019	0.029611	0.999831	-3.99419	ENSRNOG00000024798	Bora	bora, aurora kinase A activator [Source:RGD Symbol;Acc:1309522]
0.370359	0.320097	0.24799	0.807325	0.999831	-4.60194	ENSRNOG00000039297	Mrpl52	mitochondrial ribosomal protein L52 [Source:RGD Symbol;Acc:1309297]
0.370039	4.01371	0.997809	0.333355	0.999831	-4.63219	ENSRNOG00000016000	NA	NA
0.368984	3.29433	1.14789	0.268036	0.999831	-4.57695	ENSRNOG00000019977	Ptprf	protein tyrosine phosphatase, receptor type, F [Source:RGD Symbol;Acc:3453]
0.368798	3.34435	1.04815	0.310281	0.999831	-4.61611	ENSRNOG00000004639	Traf6	TNF receptor associated factor 6 [Source:RGD Symbol;Acc:1306853]
0.368531	1.81991	0.948864	0.356927	0.999831	-4.60228	ENSRNOG00000027733	Lair1	leukocyte-associated immunoglobulin-like receptor 1 [Source:RGD Symbol;Acc:1560048]
0.367911	2.36394	1.61761	0.125461	0.999831	-4.47616	ENSRNOG00000000283	Ess2	ess-2 splicing factor homolog [Source:RGD Symbol;Acc:1308218]
0.367802	5.42739	1.81213	0.0889426	0.999831	-4.17049	ENSRNOG00000031641	Rpl35a	ribosomal protein L35A [Source:RGD Symbol;Acc:2323795]
0.367645	4.17543	2.97796	0.00894537	0.999831	-3.46947	ENSRNOG00000042777	Zfp28	zinc finger protein 28 [Source:RGD Symbol;Acc:7679103]
0.36741	1.96807	1.62633	0.123583	0.999831	-4.48532	ENSRNOG00000013969	Ahi1	Abelson helper integration site 1 [Source:RGD Symbol;Acc:1303040]
0.366787	2.26745	1.08123	0.295763	0.999831	-4.58911	ENSRNOG00000023521	Map3k10	mitogen activated protein kinase kinase kinase 10 [Source:RGD Symbol;Acc:1308381]
0.366749	0.974615	0.654973	0.521873	0.999831	-4.60835	ENSRNOG00000003699	Endov	endonuclease V [Source:RGD Symbol;Acc:1562414]
0.365881	4.56021	2.18452	0.0442922	0.999831	-3.9149	ENSRNOG00000006483	Heatr5a	HEAT repeat containing 5A [Source:RGD Symbol;Acc:1561116]
0.364834	0.818787	0.777915	0.448071	0.999831	-4.60624	ENSRNOG00000001344	NA	NA
0.364681	2.09695	1.01922	0.323396	0.999831	-4.59901	ENSRNOG00000008530	Stoml1	stomatin like 1 [Source:RGD Symbol;Acc:1559463]
0.363796	1.65178	0.890462	0.386528	0.999831	-4.60681	ENSRNOG00000005303	Tbc1d25	TBC1 domain family, member 25 [Source:RGD Symbol;Acc:1559711]
0.363452	2.68234	1.30191	0.21154	0.999831	-4.55473	ENSRNOG00000007044	L3mbtl1	L3MBTL histone methyl-lysine binding protein 1 [Source:RGD Symbol;Acc:1307316]
0.362815	2.88605	1.27116	0.222003	0.999831	-4.54867	ENSRNOG00000004158	Hdac9	histone deacetylase 9 [Source:RGD Symbol;Acc:1310748]
0.362677	1.46361	1.59426	0.13061	0.999831	-4.46345	ENSRNOG00000019057	Prkcq	protein kinase C, theta [Source:RGD Symbol;Acc:620968]
0.362622	2.60749	1.44573	0.167727	0.999831	-4.50412	ENSRNOG00000023633	Crabp1	cellular retinoic acid binding protein 1 [Source:RGD Symbol;Acc:2400]
0.362453	5.38911	1.23543	0.23466	0.999831	-4.57631	ENSRNOG00000046867	NA	NA
0.362116	1.71086	1.44376	0.168272	0.999831	-4.54875	ENSRNOG00000039204	NA	NA
0.361881	1.36349	1.01269	0.32641	0.999831	-4.59594	ENSRNOG00000018413	Per3	period circadian regulator 3 [Source:RGD Symbol;Acc:621581]
0.361841	2.24218	1.97487	0.0659578	0.999831	-4.34219	ENSRNOG00000009565	Pdk4	pyruvate dehydrogenase kinase 4 [Source:RGD Symbol;Acc:69061]
0.361555	2.98306	1.05539	0.30706	0.999831	-4.59677	ENSRNOG00000049497	Eif6	eukaryotic translation initiation factor 6 [Source:RGD Symbol;Acc:1305373]
0.361442	3.08711	1.3674	0.19057	0.999831	-4.51636	ENSRNOG00000020067	Rab40c	Rab40c, member RAS oncogene family [Source:RGD Symbol;Acc:727914]
0.361324	2.51176	0.33968	0.738555	0.999831	-4.61861	ENSRNOG00000017644	Usp6nl	USP6 N-terminal like [Source:RGD Symbol;Acc:1311786]
0.360697	2.946	1.15324	0.2659	0.999831	-4.57459	ENSRNOG00000010154	Zc3hc1	zinc finger, C3HC-type containing 1 [Source:RGD Symbol;Acc:1561099]
0.360483	2.13445	1.30205	0.211495	0.999831	-4.55591	ENSRNOG00000001890	Txnrd2	thioredoxin reductase 2 [Source:RGD Symbol;Acc:61960]
0.357826	1.36022	0.649316	0.525428	0.999831	-4.61931	ENSRNOG00000001198	Fam222a	family with sequence similarity 222, member A [Source:RGD Symbol;Acc:1565883]
0.357549	1.40311	0.857238	0.404083	0.999831	-4.60669	ENSRNOG00000015503	Otud7a	OTU deubiquitinase 7A [Source:RGD Symbol;Acc:1563721]
0.357203	4.4963	3.31281	0.00444308	0.999831	-3.03102	ENSRNOG00000056184	Lrp2	LDL receptor related protein 2 [Source:RGD Symbol;Acc:68407]
0.357154	2.77515	1.10805	0.284362	0.999831	-4.58857	ENSRNOG00000009303	Zwilch	zwilch kinetochore protein [Source:RGD Symbol;Acc:1583880]
0.357001	5.21783	2.64166	0.017866	0.999831	-3.47127	ENSRNOG00000015075	Stc1	stanniocalcin 1 [Source:RGD Symbol;Acc:621776]
0.356659	2.49775	0.848747	0.408652	0.999831	-4.61613	ENSRNOG00000020443	Tsks	testis-specific serine kinase substrate [Source:RGD Symbol;Acc:727784]
0.356491	2.01431	1.30174	0.211598	0.999831	-4.55428	ENSRNOG00000009243	Oaf	out at first homolog [Source:RGD Symbol;Acc:1305890]
0.356349	2.23144	0.852901	0.406413	0.999831	-4.61562	ENSRNOG00000020302	Klhl17	kelch-like family member 17 [Source:RGD Symbol;Acc:708444]
0.356315	0.587914	0.300607	0.767619	0.999831	-4.59751	ENSRNOG00000060496	Kdm5d	lysine demethylase 5D [Source:RGD Symbol;Acc:2314436]
0.355138	4.77215	1.05724	0.306241	0.999831	-4.63762	ENSRNOG00000002669	Cluh	clustered mitochondria homolog [Source:RGD Symbol;Acc:1307222]
0.35507	2.26472	1.24291	0.231966	0.999831	-4.56107	ENSRNOG00000012722	Ppdpf	pancreatic progenitor cell differentiation and proliferation factor [Source:RGD Symbol;Acc:1310660]
0.354829	2.96345	1.66868	0.114801	0.999831	-4.39112	ENSRNOG00000008837	Ass1	argininosuccinate synthase 1 [Source:RGD Symbol;Acc:2163]
0.354675	5.30086	1.22892	0.237028	0.999831	-4.56411	ENSRNOG00000055525	Kmt2b	lysine methyltransferase 2B [Source:RGD Symbol;Acc:7678027]
0.354625	3.36951	1.26271	0.224947	0.999831	-4.5365	ENSRNOG00000030877	Htr2c	5-hydroxytryptamine receptor 2C [Source:RGD Symbol;Acc:2848]
0.353831	2.6398	0.851622	0.407101	0.999831	-4.62829	ENSRNOG00000058882	Emd	emerin [Source:RGD Symbol;Acc:2551]
0.353807	3.82502	1.13572	0.272947	0.999831	-4.59935	ENSRNOG00000050220	Nrxn1	neurexin 1 [Source:RGD Symbol;Acc:628659]
0.353744	2.98561	0.946271	0.358207	0.999831	-4.61771	ENSRNOG00000018980	Tjap1	tight junction associated protein 1 [Source:RGD Symbol;Acc:1308708]
0.353576	-0.526977	0.238728	0.814374	0.999831	-4.6034	ENSRNOG00000021150	Plcb3	phospholipase C beta 3 [Source:RGD Symbol;Acc:61993]
0.353508	2.76207	1.20462	0.246023	0.999831	-4.56256	ENSRNOG00000003728	Xylt2	xylosyltransferase 2 [Source:RGD Symbol;Acc:619765]
0.353219	4.02136	1.96684	0.0669527	0.999831	-4.15578	ENSRNOG00000004672	Sec14l2	SEC14-like lipid binding 2 [Source:RGD Symbol;Acc:621779]
0.352809	2.60289	0.84272	0.411916	0.999831	-4.62619	ENSRNOG00000001440	Mdh2	malate dehydrogenase 2 [Source:RGD Symbol;Acc:619719]
0.352614	0.581474	0.482141	0.636292	0.999831	-4.61676	ENSRNOG00000051570	Znf845l-ps1	zinc finger protein 845 like, pseudogene 1 [Source:RGD Symbol;Acc:7732425]
0.351432	6.29974	1.16797	0.260078	0.999831	-4.63169	ENSRNOG00000029042	Mt-nd6	mitochondrially encoded NADH:ubiquinone oxidoreductase core subunit 6 [Source:RGD Symbol;Acc:620561]
0.351366	1.67292	1.13738	0.272275	0.999831	-4.58419	ENSRNOG00000018591	Rabepk	Rab9 effector protein with kelch motifs [Source:RGD Symbol;Acc:1310612]
0.350851	4.13002	3.07432	0.00731971	0.999831	-3.45108	ENSRNOG00000050647	Hspa1b	heat shock protein family A (Hsp70) member 1B [Source:RGD Symbol;Acc:1593284]
0.349554	2.39236	1.1831	0.254202	0.999831	-4.5716	ENSRNOG00000018848	Eif1b	eukaryotic translation initiation factor 1B [Source:RGD Symbol;Acc:1309241]
0.348737	1.33039	1.40691	0.178751	0.999831	-4.55648	ENSRNOG00000020721	Nme6	NME/NM23 nucleoside diphosphate kinase 6 [Source:RGD Symbol;Acc:61896]
0.348688	3.40423	2.37368	0.0305961	0.999831	-3.9196	ENSRNOG00000005335	Galnt13	polypeptide N-acetylgalactosaminyltransferase 13 [Source:RGD Symbol;Acc:735044]
0.348163	3.75263	1.5784	0.13421	0.999831	-4.40507	ENSRNOG00000046227	Tprg1l	tumor protein p63 regulated 1-like [Source:RGD Symbol;Acc:1590079]
0.347774	4.47515	1.74257	0.100764	0.999831	-4.24978	ENSRNOG00000037909	Ppm1f	protein phosphatase, Mg2+/Mn2+ dependent, 1F [Source:RGD Symbol;Acc:631363]
0.347133	2.88318	2.71767	0.0153008	0.999831	-3.98934	ENSRNOG00000019306	Syt12	synaptotagmin 12 [Source:RGD Symbol;Acc:621876]
0.346812	3.29068	1.44985	0.166591	0.999831	-4.45453	ENSRNOG00000060665	Afap1	actin filament associated protein 1 [Source:RGD Symbol;Acc:619959]
0.346741	5.91001	2.2162	0.0416585	0.999831	-3.83156	ENSRNOG00000021359	Mtfr1	mitochondrial fission regulator 1 [Source:RGD Symbol;Acc:1304936]
0.346431	3.66559	1.51207	0.150188	0.999831	-4.43426	ENSRNOG00000013794	Rbp1	retinol binding protein 1 [Source:RGD Symbol;Acc:3543]
0.346317	1.17804	0.245954	0.808873	0.999831	-4.60607	ENSRNOG00000017290	Zfp335	zinc finger protein 335 [Source:RGD Symbol;Acc:628751]
0.34614	2.01712	1.27765	0.219761	0.999831	-4.55188	ENSRNOG00000047786	NA	NA
0.345934	2.90846	1.28684	0.216617	0.999831	-4.54218	ENSRNOG00000019572	Lsm4	LSM4 homolog, U6 small nuclear RNA and mRNA degradation associated [Source:RGD Symbol;Acc:1306808]
0.345458	0.700134	0.715548	0.484674	0.999831	-4.6059	ENSRNOG00000012379	Wdr18	WD repeat domain 18 [Source:RGD Symbol;Acc:1310646]
0.345422	3.96913	1.06338	0.303534	0.999831	-4.61352	ENSRNOG00000002636	Abat	4-aminobutyrate aminotransferase [Source:RGD Symbol;Acc:620948]
0.34465	5.94118	1.11931	0.279677	0.999831	-4.64089	ENSRNOG00000022395	Tnrc6c	trinucleotide repeat containing adaptor 6C [Source:RGD Symbol;Acc:1310027]
0.344594	2.57778	1.02771	0.319506	0.999831	-4.60756	ENSRNOG00000024482	Tnrc18	trinucleotide repeat containing 18 [Source:RGD Symbol;Acc:1307540]
0.34353	2.48766	1.45312	0.165693	0.999831	-4.51322	ENSRNOG00000017250	Gmpr	guanosine monophosphate reductase [Source:RGD Symbol;Acc:70980]
0.343448	4.66591	1.8367	0.0850708	0.999831	-4.18095	ENSRNOG00000002244	Pdgfra	platelet derived growth factor receptor alpha [Source:RGD Symbol;Acc:3284]
0.343294	1.86227	0.890795	0.386355	0.999831	-4.6105	ENSRNOG00000023639	Rpusd1	RNA pseudouridine synthase domain containing 1 [Source:RGD Symbol;Acc:1304934]
0.341933	1.57561	2.08061	0.0540477	0.999831	-4.43302	ENSRNOG00000013962	Magi2	membrane associated guanylate kinase, WW and PDZ domain containing 2 [Source:RGD Symbol;Acc:621855]
0.341904	3.4193	1.17712	0.256514	0.999831	-4.5698	ENSRNOG00000014999	Tnpo1	transportin 1 [Source:RGD Symbol;Acc:1308372]
0.341867	3.88992	1.70241	0.108195	0.999831	-4.30946	ENSRNOG00000008534	Dusp15	dual specificity phosphatase 15 [Source:RGD Symbol;Acc:1305990]
0.34135	5.90635	1.14761	0.268147	0.999831	-4.61744	ENSRNOG00000013533	Acin1	apoptotic chromatin condensation inducer 1 [Source:RGD Symbol;Acc:1311945]
0.340889	1.6771	1.1868	0.252781	0.999831	-4.57654	ENSRNOG00000026994	Afg3l1	AFG3 (ATPase family gene 3)-like 1 [Source:RGD Symbol;Acc:1309722]
0.340803	3.71871	0.573838	0.574126	0.999831	-4.6956	ENSRNOG00000026109	Prmt1	protein arginine methyltransferase 1 [Source:RGD Symbol;Acc:62020]
0.340467	2.9793	1.78688	0.0930846	0.999831	-4.36645	ENSRNOG00000007881	Mtmr14	myotubularin related protein 14 [Source:RGD Symbol;Acc:1304842]
0.339625	2.92291	2.01113	0.0616294	0.999831	-4.17487	ENSRNOG00000016289	Bmpr1b	bone morphogenetic protein receptor type 1B [Source:RGD Symbol;Acc:1595863]
0.339336	1.52477	1.33119	0.201948	0.999831	-4.55049	ENSRNOG00000005522	Sh3yl1	SH3 and SYLF domain containing 1 [Source:RGD Symbol;Acc:1306440]
0.338801	1.34861	1.5376	0.143858	0.999831	-4.52453	ENSRNOG00000031275	Sms-ps2	spermine synthase, pseudogene 2 [Source:RGD Symbol;Acc:1585184]
0.338788	3.14994	0.911233	0.375817	0.999831	-4.62592	ENSRNOG00000017916	Rexo1	RNA exonuclease 1 homolog [Source:RGD Symbol;Acc:1309872]
0.338524	2.9955	0.640943	0.530714	0.999831	-4.6566	ENSRNOG00000019973	Arl3	ADP ribosylation factor like GTPase 3 [Source:RGD Symbol;Acc:69327]
0.338205	3.76192	1.19866	0.248268	0.999831	-4.56211	ENSRNOG00000016888	Pask	PAS domain containing serine/threonine kinase [Source:RGD Symbol;Acc:1306146]
0.337948	2.17153	0.670271	0.512329	0.999831	-4.62613	ENSRNOG00000024278	Rbm42	RNA binding motif protein 42 [Source:RGD Symbol;Acc:1306184]
0.337464	4.55202	1.23079	0.236346	0.999831	-4.56367	ENSRNOG00000026248	Nmt2	N-myristoyltransferase 2 [Source:RGD Symbol;Acc:1303175]
0.337301	2.11723	0.644127	0.5287	0.999831	-4.62073	ENSRNOG00000019349	Sf3a2	splicing factor 3A subunit 2 [Source:RGD Symbol;Acc:1308627]
0.337124	3.46453	1.49639	0.154187	0.999831	-4.44978	ENSRNOG00000014078	Ndufb8	NADH:ubiquinone oxidoreductase subunit B8 [Source:RGD Symbol;Acc:1309129]
0.335582	2.01325	1.30168	0.211619	0.999831	-4.55891	ENSRNOG00000018445	Agt	angiotensinogen [Source:RGD Symbol;Acc:2069]
0.335235	1.84907	0.7568	0.460267	0.999831	-4.61602	ENSRNOG00000016655	Pex6	peroxisomal biogenesis factor 6 [Source:RGD Symbol;Acc:621637]
0.33491	1.22832	0.843858	0.411298	0.999831	-4.60572	ENSRNOG00000055433	Trim46	tripartite motif-containing 46 [Source:RGD Symbol;Acc:1305993]
0.334865	3.93407	1.38637	0.184819	0.999831	-4.47879	ENSRNOG00000004172	Pdk2	pyruvate dehydrogenase kinase 2 [Source:RGD Symbol;Acc:69428]
0.3338	2.68408	1.91178	0.0741462	0.999831	-4.34408	ENSRNOG00000003064	Bst1	bone marrow stromal cell antigen 1 [Source:RGD Symbol;Acc:620344]
0.333244	6.69067	1.39558	0.182076	0.999831	-4.4723	ENSRNOG00000054770	Rdh11	retinol dehydrogenase 11 [Source:RGD Symbol;Acc:1312001]
0.332871	1.94059	1.03286	0.317164	0.999831	-4.59672	ENSRNOG00000057901	Zfp707l1	zinc finger protein 707-like 1 [Source:RGD Symbol;Acc:1562665]
0.332711	0.21722	0.341285	0.737369	0.999831	-4.65386	ENSRNOG00000061832	NA	NA
0.332553	1.77463	1.94312	0.0699706	0.999831	-4.43736	ENSRNOG00000022691	St8sia5	ST8 alpha-N-acetyl-neuraminide alpha-2,8-sialyltransferase 5 [Source:RGD Symbol;Acc:1302934]
0.332352	3.86586	1.29099	0.215209	0.999831	-4.52385	ENSRNOG00000039559	Fam219a	family with sequence similarity 219, member A [Source:RGD Symbol;Acc:1588668]
0.331035	2.00618	1.08328	0.294881	0.999831	-4.58901	ENSRNOG00000014522	Mlycd	malonyl-CoA decarboxylase [Source:RGD Symbol;Acc:620234]
0.330906	-3.82225	0.0803442	0.936969	0.999831	-4.59678	ENSRNOG00000015655	Ptgfrn	prostaglandin F2 receptor inhibitor [Source:RGD Symbol;Acc:3437]
0.330741	4.2351	1.73486	0.102154	0.999831	-4.27045	ENSRNOG00000009063	Dnajc15	DnaJ heat shock protein family (Hsp40) member C15 [Source:RGD Symbol;Acc:1307154]
0.330626	1.07974	1.15444	0.26542	0.999831	-4.58361	ENSRNOG00000013090	Gadd45g	growth arrest and DNA-damage-inducible, gamma [Source:RGD Symbol;Acc:1311796]
0.330606	1.76805	1.03591	0.315781	0.999831	-4.59415	ENSRNOG00000014065	Zfp653	zinc finger protein 653 [Source:RGD Symbol;Acc:1308754]
0.330348	3.51373	2.58378	0.0200909	0.999831	-3.82508	ENSRNOG00000042717	Ciart	circadian associated repressor of transcription [Source:RGD Symbol;Acc:1566380]
0.329953	3.87079	1.51803	0.148688	0.999831	-4.42617	ENSRNOG00000018998	Yipf3	Yip1 domain family, member 3 [Source:RGD Symbol;Acc:1308185]
0.329637	1.3985	0.755938	0.460769	0.999831	-4.61857	ENSRNOG00000011908	Asxl2	ASXL transcriptional regulator 2 [Source:RGD Symbol;Acc:1304710]
0.329528	3.17244	2.71106	0.0155092	0.999831	-3.93939	ENSRNOG00000042691	Armc7	armadillo repeat containing 7 [Source:RGD Symbol;Acc:1310043]
0.329118	3.36731	1.30505	0.210496	0.999831	-4.5239	ENSRNOG00000023021	Msl2	MSL complex subunit 2 [Source:RGD Symbol;Acc:1310355]
0.328953	5.85726	1.33915	0.199402	0.999831	-4.51415	ENSRNOG00000013379	Zfp422	zinc finger protein 422 [Source:RGD Symbol;Acc:620229]
0.328733	1.91041	0.744355	0.46755	0.999831	-4.62549	ENSRNOG00000021048	Lmtk3	lemur tyrosine kinase 3 [Source:RGD Symbol;Acc:1588641]
0.328716	3.088	0.771172	0.451943	0.999831	-4.69299	ENSRNOG00000011448	Eri1	exoribonuclease 1 [Source:RGD Symbol;Acc:1308378]
0.327533	4.61462	1.53686	0.144039	0.999831	-4.39155	ENSRNOG00000012084	Xpnpep1	X-prolyl aminopeptidase 1 [Source:RGD Symbol;Acc:621274]
0.326642	3.32384	1.63189	0.122399	0.999831	-4.40605	ENSRNOG00000004591	Alg12	ALG12, alpha-1,6-mannosyltransferase [Source:RGD Symbol;Acc:1304826]
0.326614	2.53212	1.022	0.322121	0.999831	-4.60023	ENSRNOG00000046245	AABR07057423.1	membrane associated ring-CH-type finger 9 [Source:RGD Symbol;Acc:1590688]
0.326386	2.22975	1.32081	0.205308	0.999831	-4.55188	ENSRNOG00000015974	Tmem208	transmembrane protein 208 [Source:RGD Symbol;Acc:1560953]
0.326018	5.1745	0.592596	0.561807	0.999831	-4.80014	ENSRNOG00000058476	Mast2	microtubule associated serine/threonine kinase 2 [Source:RGD Symbol;Acc:1304573]
0.325682	2.30961	1.04925	0.309793	0.999831	-4.59367	ENSRNOG00000019136	Scamp2	secretory carrier membrane protein 2 [Source:RGD Symbol;Acc:68348]
0.325518	1.20572	1.00746	0.32884	0.999831	-4.5961	ENSRNOG00000011171	Rims3	regulating synaptic membrane exocytosis 3 [Source:RGD Symbol;Acc:628762]
0.325425	1.27157	0.878496	0.392791	0.999831	-4.61009	ENSRNOG00000019718	Galnt15	polypeptide N-acetylgalactosaminyltransferase 15 [Source:RGD Symbol;Acc:2322081]
0.32473	3.44776	0.801532	0.43467	0.999831	-4.66129	ENSRNOG00000018564	Nup93	nucleoporin 93 [Source:RGD Symbol;Acc:1311525]
0.32453	3.5131	1.25181	0.228789	0.999831	-4.54162	ENSRNOG00000028747	Rpl22	ribosomal protein L22 [Source:RGD Symbol;Acc:621189]
0.323966	4.54511	1.68413	0.111734	0.999831	-4.3571	ENSRNOG00000011648	Aqp1	aquaporin 1 [Source:RGD Symbol;Acc:2141]
0.323939	2.56101	1.23186	0.235954	0.999831	-4.56036	ENSRNOG00000021010	Arl2	ADP-ribosylation factor like GTPase 2 [Source:RGD Symbol;Acc:69326]
0.323801	4.79353	1.42616	0.173212	0.999831	-4.44945	ENSRNOG00000055608	LOC102548695	zinc finger protein 45-like [Source:RGD Symbol;Acc:7529325]
0.323769	1.78899	0.776683	0.448777	0.999831	-4.62533	ENSRNOG00000004392	Aatk	apoptosis-associated tyrosine kinase [Source:RGD Symbol;Acc:1590980]
0.323691	1.61182	1.44709	0.16735	0.999831	-4.54612	ENSRNOG00000023603	Amer3	APC membrane recruitment protein 3 [Source:RGD Symbol;Acc:1560420]
0.323599	2.53978	1.06078	0.304681	0.999831	-4.59361	ENSRNOG00000004936	Sdc2	syndecan 2 [Source:RGD Symbol;Acc:3649]
0.323488	2.93414	2.19864	0.0431004	0.999831	-4.1995	ENSRNOG00000019613	Syt9	synaptotagmin 9 [Source:RGD Symbol;Acc:621169]
0.323258	1.8882	1.50528	0.151909	0.999831	-4.52088	ENSRNOG00000022354	Pusl1	pseudouridine synthase like 1 [Source:RGD Symbol;Acc:1559560]
0.322988	1.79387	1.09139	0.291405	0.999831	-4.58891	ENSRNOG00000056962	Nat8b	N-acetyltransferase 8B [Source:RGD Symbol;Acc:621605]
0.322861	2.08253	1.27475	0.22076	0.999831	-4.54976	ENSRNOG00000038212	Socs6	suppressor of cytokine signaling 6 [Source:RGD Symbol;Acc:1304632]
0.320925	2.55493	0.998917	0.332834	0.999831	-4.60595	ENSRNOG00000021181	Sf3b4	splicing factor 3B subunit 4 [Source:RGD Symbol;Acc:1309667]
0.319672	0.997879	0.47628	0.64037	0.999831	-4.61389	ENSRNOG00000021395	LOC100363452	ribosomal protein S8-like [Source:RGD Symbol;Acc:2322993]
0.319035	1.71373	1.13387	0.2737	0.999831	-4.58487	ENSRNOG00000010539	Mcat	malonyl-CoA-acyl carrier protein transacylase [Source:RGD Symbol;Acc:1306698]
0.31835	4.40773	1.87488	0.0793489	0.999831	-4.17977	ENSRNOG00000006895	Vps53	VPS53 subunit of GARP complex [Source:RGD Symbol;Acc:1311391]
0.318293	2.3827	1.75144	0.0991831	0.999831	-4.45062	ENSRNOG00000008898	Trmt44	tRNA methyltransferase 44 [Source:RGD Symbol;Acc:1308380]
0.318237	3.17063	1.18306	0.25422	0.999831	-4.56601	ENSRNOG00000003645	Hnrnpab	heterogeneous nuclear ribonucleoprotein A/B [Source:RGD Symbol;Acc:69255]
0.317634	5.0401	1.24124	0.232566	0.999831	-4.55375	ENSRNOG00000012046	Prmt5	protein arginine methyltransferase 5 [Source:RGD Symbol;Acc:1309053]
0.317245	2.98824	1.19715	0.248839	0.999831	-4.56132	ENSRNOG00000007041	Abcg2	ATP binding cassette subfamily G member 2 [Source:RGD Symbol;Acc:631345]
0.317032	2.51468	1.92428	0.0724556	0.999831	-4.34432	ENSRNOG00000018674	Ntrk3	neurotrophic receptor tyrosine kinase 3 [Source:RGD Symbol;Acc:3214]
0.316941	3.15669	3.23582	0.00522188	0.999831	-3.57215	ENSRNOG00000016752	Crispld2	cysteine-rich secretory protein LCCL domain containing 2 [Source:RGD Symbol;Acc:620860]
0.316582	11.5178	1.35225	0.195265	0.999831	-4.50171	ENSRNOG00000017589	Gnat1	G protein subunit alpha transducin 1 [Source:RGD Symbol;Acc:1304683]
0.316404	0.842059	0.619862	0.544153	0.999831	-4.60899	ENSRNOG00000018932	Ccdc124	coiled-coil domain containing 124 [Source:RGD Symbol;Acc:1310931]
0.3163	3.71109	0.974463	0.344458	0.999831	-4.62466	ENSRNOG00000046502	Lonp1	lon peptidase 1, mitochondrial [Source:RGD Symbol;Acc:621598]
0.316178	1.87903	2.34628	0.032298	0.999831	-4.36323	ENSRNOG00000013318	Ccdc150	coiled-coil domain containing 150 [Source:RGD Symbol;Acc:1304775]
0.316019	1.51035	1.03157	0.317751	0.999831	-4.5949	ENSRNOG00000031643	Dchs1	dachsous cadherin-related 1 [Source:RGD Symbol;Acc:1309878]
0.315342	2.22634	0.73893	0.470746	0.999831	-4.63275	ENSRNOG00000034102	Plk5	polo-like kinase 5 [Source:RGD Symbol;Acc:1305038]
0.315277	2.86909	1.31631	0.206778	0.999831	-4.53367	ENSRNOG00000011093	Ssna1	SS nuclear autoantigen 1 [Source:RGD Symbol;Acc:1310259]
0.315084	2.14688	1.05572	0.306914	0.999831	-4.59234	ENSRNOG00000016062	Snta1	syntrophin, alpha 1 [Source:RGD Symbol;Acc:1307068]
0.313833	1.84107	2.14189	0.0480799	0.999831	-4.33167	ENSRNOG00000002212	Hsd17b13	hydroxysteroid (17-beta) dehydrogenase 13 [Source:RGD Symbol;Acc:1359553]
0.313734	1.65392	1.42545	0.173413	0.999831	-4.54018	ENSRNOG00000008758	Tspan18	tetraspanin 18 [Source:RGD Symbol;Acc:1560411]
0.313404	4.20218	0.737144	0.471801	0.999831	-4.71122	ENSRNOG00000015447	Calcoco1	calcium binding and coiled coil domain 1 [Source:RGD Symbol;Acc:619812]
0.311921	3.19947	0.78505	0.443995	0.999831	-4.65398	ENSRNOG00000028302	Smarcb1	SWI/SNF related, matrix associated, actin dependent regulator of chromatin, subfamily b, member 1 [Source:RGD Symbol;Acc:1308761]
0.31157	2.61727	0.908724	0.3771	0.999831	-4.61299	ENSRNOG00000021602	Zmynd10	zinc finger, MYND-type containing 10 [Source:RGD Symbol;Acc:1303250]
0.311488	1.44887	1.02481	0.320833	0.999831	-4.59522	ENSRNOG00000018576	Rcan3	RCAN family member 3 [Source:RGD Symbol;Acc:1311826]
0.309917	2.48316	1.01004	0.327639	0.999831	-4.60262	ENSRNOG00000049949	Hapln4	hyaluronan and proteoglycan link protein 4 [Source:RGD Symbol;Acc:1308408]
0.309719	2.47459	0.999789	0.332425	0.999831	-4.60191	ENSRNOG00000016603	Rtn2	reticulon 2 [Source:RGD Symbol;Acc:1303245]
0.308909	1.48556	0.778455	0.447761	0.999831	-4.61345	ENSRNOG00000022229	Sdad1	SDA1 domain containing 1 [Source:RGD Symbol;Acc:1359112]
0.308327	2.58593	1.32478	0.20402	0.999831	-4.53897	ENSRNOG00000032630	Mrps28	mitochondrial ribosomal protein S28 [Source:RGD Symbol;Acc:1597461]
0.307798	2.10053	0.778779	0.447576	0.999831	-4.62791	ENSRNOG00000029245	Gpr179	G protein-coupled receptor 179 [Source:RGD Symbol;Acc:1560033]
0.307797	2.61382	1.01652	0.32464	0.999831	-4.60035	ENSRNOG00000016272	Edf1	endothelial differentiation-related factor 1 [Source:RGD Symbol;Acc:1308073]
0.307609	2.00333	0.959194	0.351858	0.999831	-4.60385	ENSRNOG00000016920	Spire2	spire-type actin nucleation factor 2 [Source:RGD Symbol;Acc:1305837]
0.307356	4.634	1.57672	0.134596	0.999831	-4.37198	ENSRNOG00000019649	Cul4a	cullin 4A [Source:RGD Symbol;Acc:1563853]
0.307336	4.03084	1.71717	0.105411	0.999831	-4.32262	ENSRNOG00000050742	Dnmbp	dynamin binding protein [Source:RGD Symbol;Acc:1583840]
0.307239	2.80416	0.489055	0.631498	0.999831	-4.67027	ENSRNOG00000018111	Slc12a5	solute carrier family 12 member 5 [Source:RGD Symbol;Acc:620811]
0.306366	1.89666	1.84396	0.0839542	0.999831	-4.46401	ENSRNOG00000053034	LOC102551788	uncharacterized LOC102551788 [Source:RGD Symbol;Acc:7718778]
0.306146	3.01559	1.73046	0.102956	0.999831	-4.37894	ENSRNOG00000006962	Stk32c	serine/threonine kinase 32C [Source:RGD Symbol;Acc:1305864]
0.305903	1.23447	0.951412	0.355672	0.999831	-4.60692	ENSRNOG00000002734	NA	NA
0.305487	0.945399	0.184266	0.856141	0.999831	-4.61171	ENSRNOG00000028227	Pbrm1	polybromo 1 [Source:RGD Symbol;Acc:1565549]
0.304774	0.59636	0.553372	0.587726	0.999831	-4.60801	ENSRNOG00000018229	Slc45a1	solute carrier family 45, member 1 [Source:RGD Symbol;Acc:708502]
0.304696	2.32929	1.07708	0.297559	0.999831	-4.59011	ENSRNOG00000047517	Oxld1	oxidoreductase-like domain containing 1 [Source:RGD Symbol;Acc:1590060]
0.304507	3.25809	2.27257	0.0373287	0.999831	-4.09845	ENSRNOG00000012879	Fabp3	fatty acid binding protein 3 [Source:RGD Symbol;Acc:69048]
0.304159	1.51019	0.566441	0.579023	0.999831	-4.62175	ENSRNOG00000004169	Fzr1	fizzy and cell division cycle 20 related 1 [Source:RGD Symbol;Acc:1308713]
0.30381	4.12043	1.02377	0.321307	0.999831	-4.63508	ENSRNOG00000017129	Ttll4	tubulin tyrosine ligase like 4 [Source:RGD Symbol;Acc:1594742]
0.303792	1.86034	0.820914	0.423864	0.999831	-4.62349	ENSRNOG00000060629	NA	NA
0.303414	3.16737	1.21684	0.241467	0.999831	-4.55625	ENSRNOG00000015217	Ltv1	LTV1 ribosome biogenesis factor [Source:RGD Symbol;Acc:1311264]
0.302785	4.03833	1.88369	0.0780771	0.999831	-4.20831	ENSRNOG00000010257	Cuedc1	CUE domain containing 1 [Source:RGD Symbol;Acc:1304861]
0.302591	7.12463	1.60535	0.128143	0.999831	-4.31542	ENSRNOG00000009449	Trim35	tripartite motif-containing 35 [Source:RGD Symbol;Acc:1564642]
0.30259	3.24946	1.08033	0.296152	0.999831	-4.5952	ENSRNOG00000004146	Coro7	coronin 7 [Source:RGD Symbol;Acc:621591]
0.302483	4.74011	1.18714	0.25265	0.999831	-4.57957	ENSRNOG00000019704	Resp18	regulated endocrine-specific protein 18 [Source:RGD Symbol;Acc:3555]
0.302209	2.29637	2.62556	0.0184598	0.999831	-4.13649	ENSRNOG00000021670	Frem2	FRAS1 related extracellular matrix 2 [Source:RGD Symbol;Acc:1566012]
0.302081	1.47636	0.683998	0.50385	0.999831	-4.61397	ENSRNOG00000033915	Gpt	glutamic--pyruvic transaminase [Source:RGD Symbol;Acc:621720]
0.302014	2.28372	1.291	0.215207	0.999831	-4.54693	ENSRNOG00000016050	Fgfr1	Fibroblast growth factor receptor 1 [Source:RGD Symbol;Acc:620713]
0.301983	1.81875	0.786936	0.442922	0.999831	-4.64251	ENSRNOG00000057903	NA	NA
0.30161	1.67943	1.44642	0.167535	0.999831	-4.52988	ENSRNOG00000012658	Pdlim3	PDZ and LIM domain 3 [Source:RGD Symbol;Acc:620427]
0.301134	1.82992	1.57334	0.135376	0.999831	-4.526	ENSRNOG00000034107	C7h8orf33	similar to human chromosome 8 open reading frame 33 [Source:RGD Symbol;Acc:1597990]
0.300912	2.06931	1.23839	0.233592	0.999831	-4.57629	ENSRNOG00000011277	Btg4	BTG anti-proliferation factor 4 [Source:RGD Symbol;Acc:1308809]
0.300569	1.14238	0.80873	0.430637	0.999831	-4.6087	ENSRNOG00000011552	Mon1b	MON1 homolog B, secretory trafficking associated [Source:RGD Symbol;Acc:1309977]
0.300134	6.00972	1.38492	0.185252	0.999831	-4.47896	ENSRNOG00000005130	Ogdh	oxoglutarate dehydrogenase [Source:RGD Symbol;Acc:1561359]
0.299264	2.23629	0.924488	0.369087	0.999831	-4.60785	ENSRNOG00000007827	Cox4i2	cytochrome c oxidase subunit 4i2 [Source:RGD Symbol;Acc:69422]
0.299154	2.3424	1.32963	0.20245	0.999831	-4.55073	ENSRNOG00000015749	Nme3	NME/NM23 nucleoside diphosphate kinase 3 [Source:RGD Symbol;Acc:619879]
0.299044	1.929	1.19023	0.25147	0.999831	-4.57455	ENSRNOG00000013223	Fah	fumarylacetoacetate hydrolase [Source:RGD Symbol;Acc:61932]
0.298943	1.84403	1.13739	0.272271	0.999831	-4.58211	ENSRNOG00000050071	Cdc45	cell division cycle 45 [Source:RGD Symbol;Acc:1590928]
0.298858	2.46614	0.967261	0.347935	0.999831	-4.60659	ENSRNOG00000000503	Ppard	peroxisome proliferator-activated receptor delta [Source:RGD Symbol;Acc:3370]
0.298854	2.76529	1.16392	0.261669	0.999831	-4.57195	ENSRNOG00000014204	Pacsin3	protein kinase C and casein kinase substrate in neurons 3 [Source:RGD Symbol;Acc:1307327]
0.298429	2.42414	0.727582	0.477475	0.999831	-4.6288	ENSRNOG00000023162	Car14	carbonic anhydrase 14 [Source:RGD Symbol;Acc:1599277]
0.298405	-0.463607	0.0696186	0.945368	0.999831	-4.59687	ENSRNOG00000019743	Tmem63b	transmembrane protein 63B [Source:RGD Symbol;Acc:1305862]
0.29738	2.14852	0.805224	0.432599	0.999831	-4.64841	ENSRNOG00000049426	Mmab	metabolism of cobalamin associated B [Source:RGD Symbol;Acc:1596242]
0.297184	1.41957	0.778745	0.447595	0.999831	-4.60886	ENSRNOG00000004168	Slc35e4	solute carrier family 35, member E4 [Source:RGD Symbol;Acc:708484]
0.296539	1.7601	1.01243	0.326533	0.999831	-4.59832	ENSRNOG00000018971	Mob3a	MOB kinase activator 3A [Source:RGD Symbol;Acc:1308187]
0.296263	2.58521	1.39845	0.181228	0.999831	-4.51991	ENSRNOG00000020753	Bnip1	BCL2 interacting protein 1 [Source:RGD Symbol;Acc:620799]
0.295945	4.9289	1.56178	0.138074	0.999831	-4.36292	ENSRNOG00000003213	Helz	helicase with zinc finger [Source:RGD Symbol;Acc:1307049]
0.295808	0.982649	0.526211	0.606023	0.999831	-4.60981	ENSRNOG00000020543	Nosip	nitric oxide synthase interacting protein [Source:RGD Symbol;Acc:1309992]
0.29578	0.943083	0.718902	0.482661	0.999831	-4.60856	ENSRNOG00000008287	Nle1	notchless homolog 1 [Source:RGD Symbol;Acc:1308301]
0.295293	5.19749	2.39984	0.0290497	0.999831	-3.78596	ENSRNOG00000019005	Pde8a	phosphodiesterase 8A [Source:RGD Symbol;Acc:735125]
0.294895	1.8668	0.871544	0.396461	0.999831	-4.61257	ENSRNOG00000048487	Slc12a9	solute carrier family 12, member 9 [Source:RGD Symbol;Acc:620747]
0.294733	2.87963	1.64889	0.118835	0.999831	-4.43646	ENSRNOG00000060379	Foxred1	FAD-dependent oxidoreductase domain containing 1 [Source:RGD Symbol;Acc:1311785]
0.294635	2.54836	0.929123	0.366753	0.999831	-4.61888	ENSRNOG00000050854	NA	NA
0.294175	4.16612	1.16128	0.26271	0.999831	-4.58067	ENSRNOG00000000990	Pdap1	PDGFA associated protein 1 [Source:RGD Symbol;Acc:620442]
0.294088	2.81371	2.15879	0.0465442	0.999831	-4.19413	ENSRNOG00000019622	Ackr3	atypical chemokine receptor 3 [Source:RGD Symbol;Acc:620601]
0.293895	5.33553	1.06974	0.30075	0.999831	-4.65197	ENSRNOG00000014665	Dhdds	dehydrodolichyl diphosphate synthase subunit [Source:RGD Symbol;Acc:1311560]
0.293887	3.18733	1.28622	0.21683	0.999831	-4.53125	ENSRNOG00000021137	Kctd15	potassium channel tetramerization domain containing 15 [Source:RGD Symbol;Acc:1583737]
0.293625	3.54773	0.892315	0.385565	0.999831	-4.64898	ENSRNOG00000020982	LOC687780	similar to Finkel-Biskis-Reilly murine sarcoma virusubiquitously expressed [Source:RGD Symbol;Acc:1597505]
0.293559	4.44024	1.75096	0.0992685	0.999831	-4.24184	ENSRNOG00000055471	Ywhah	tyrosine 3-monooxygenase/tryptophan 5-monooxygenase activation protein, eta [Source:RGD Symbol;Acc:3978]
0.293147	3.75231	1.02864	0.319086	0.999831	-4.6226	ENSRNOG00000039350	Gng13	G protein subunit gamma 13 [Source:RGD Symbol;Acc:1593806]
0.293128	2.14795	1.04163	0.313203	0.999831	-4.59443	ENSRNOG00000007083	Gpn2	GPN-loop GTPase 2 [Source:RGD Symbol;Acc:1311749]
0.292727	4.32375	2.15338	0.0470306	0.999831	-3.99499	ENSRNOG00000051256	R3hcc1l	R3H domain and coiled-coil containing 1-like [Source:RGD Symbol;Acc:1307934]
0.292642	8.05439	1.85937	0.0816299	0.999831	-4.09985	ENSRNOG00000036742	Uqcrc2	ubiquinol cytochrome c reductase core protein 2 [Source:RGD Symbol;Acc:1359150]
0.292613	2.12122	0.90568	0.37866	0.999831	-4.6096	ENSRNOG00000025350	Ppp1r13l	protein phosphatase 1, regulatory subunit 13 like [Source:RGD Symbol;Acc:1593681]
0.292397	1.20074	0.858206	0.403564	0.999831	-4.60423	ENSRNOG00000058039	Acta2	actin alpha 2, smooth muscle [Source:RGD Symbol;Acc:621676]
0.292384	4.62762	1.32953	0.202483	0.999831	-4.50571	ENSRNOG00000011789	Cdon	cell adhesion associated, oncogene regulated [Source:RGD Symbol;Acc:708433]
0.292126	1.3485	0.701164	0.493362	0.999831	-4.6055	ENSRNOG00000022331	Ccdc78	coiled-coil domain containing 78 [Source:RGD Symbol;Acc:1560244]
0.291847	1.57111	0.442983	0.663762	0.999831	-4.65122	ENSRNOG00000010915	Ermp1	endoplasmic reticulum metallopeptidase 1 [Source:RGD Symbol;Acc:727831]
0.291843	2.57881	0.999396	0.332609	0.999831	-4.60397	ENSRNOG00000050180	Zfpl1	zinc finger protein-like 1 [Source:RGD Symbol;Acc:1586738]
0.291624	2.04281	0.814121	0.427632	0.999831	-4.65017	ENSRNOG00000010625	Dnmt3b	DNA methyltransferase 3 beta [Source:RGD Symbol;Acc:1303274]
0.29145	1.86883	1.06024	0.304919	0.999831	-4.59318	ENSRNOG00000013679	Sema4d	semaphorin 4D [Source:RGD Symbol;Acc:1310554]
0.291441	1.89507	0.768855	0.453279	0.999831	-4.63617	ENSRNOG00000018985	Grk2	G protein-coupled receptor kinase 2 [Source:RGD Symbol;Acc:2062]
0.29111	1.82217	1.5872	0.132203	0.999831	-4.50485	ENSRNOG00000030775	Adarb2	adenosine deaminase, RNA-specific, B2 [Source:RGD Symbol;Acc:621519]
0.29104	5.68057	3.11827	0.0066781	0.999831	-2.99908	ENSRNOG00000050087	Mphosph6	M phase phosphoprotein 6 [Source:RGD Symbol;Acc:1591222]
0.290805	2.369	1.17223	0.258413	0.999831	-4.57208	ENSRNOG00000018358	Nt5dc2	5'-nucleotidase domain containing 2 [Source:RGD Symbol;Acc:1305524]
0.290315	2.65762	1.1265	0.276713	0.999831	-4.58088	ENSRNOG00000023494	Tti2	TELO2 interacting protein 2 [Source:RGD Symbol;Acc:1310414]
0.290165	1.3746	1.37938	0.186921	0.999831	-4.55279	ENSRNOG00000019982	Ethe1	ETHE1, persulfide dioxygenase [Source:RGD Symbol;Acc:1311034]
0.289851	2.83558	1.22239	0.239418	0.999831	-4.55494	ENSRNOG00000004819	Porcn	porcupine O-acyltransferase [Source:RGD Symbol;Acc:1564947]
0.289626	3.98562	1.20718	0.245063	0.999831	-4.56059	ENSRNOG00000018457	Ptpa	protein phosphatase 2 phosphatase activator [Source:RGD Symbol;Acc:1308354]
0.289206	6.13323	1.47435	0.159963	0.999831	-4.41644	ENSRNOG00000026226	Hook1	hook microtubule-tethering protein 1 [Source:RGD Symbol;Acc:1309987]
0.288997	4.21384	0.980828	0.341405	0.999831	-4.65934	ENSRNOG00000001223	Pttg1ip	PTTG1 interacting protein [Source:RGD Symbol;Acc:1305983]
0.288492	6.33938	1.49568	0.154372	0.999831	-4.40114	ENSRNOG00000007472	Setd5	SET domain containing 5 [Source:RGD Symbol;Acc:1310433]
0.28817	3.20197	0.773701	0.450488	0.999831	-4.65495	ENSRNOG00000020233	Rabac1	Rab acceptor 1 [Source:RGD Symbol;Acc:621002]
0.288041	1.57306	1.03184	0.31763	0.999831	-4.59441	ENSRNOG00000025245	RGD1311946	similar to RIKEN cDNA 1810055G02 [Source:RGD Symbol;Acc:1311946]
0.287222	0.568248	0.48437	0.634745	0.999831	-4.64497	ENSRNOG00000059458	Tbc1d22b	TBC1 domain family, member 22B [Source:RGD Symbol;Acc:1564987]
0.286449	1.92506	1.13043	0.275103	0.999831	-4.58305	ENSRNOG00000021092	Scnm1	sodium channel modifier 1 [Source:RGD Symbol;Acc:1308968]
0.286343	1.75861	0.730373	0.475815	0.999831	-4.62107	ENSRNOG00000058068	Obscn	obscurin, cytoskeletal calmodulin and titin-interacting RhoGEF [Source:RGD Symbol;Acc:631335]
0.286228	3.2826	2.62311	0.018552	0.999831	-3.79881	ENSRNOG00000005770	Sostdc1	sclerostin domain containing 1 [Source:RGD Symbol;Acc:628877]
0.286168	3.97573	0.856944	0.40424	0.999831	-4.68556	ENSRNOG00000001173	Cabp1	calcium binding protein 1 [Source:RGD Symbol;Acc:620385]
0.286017	4.88976	1.63643	0.121439	0.999831	-4.31844	ENSRNOG00000031760	Fmn1	formin 1 [Source:RGD Symbol;Acc:1306349]
0.285864	3.72684	1.35653	0.193928	0.999831	-4.49744	ENSRNOG00000042482	Tatdn2	TatD DNase domain containing 2 [Source:RGD Symbol;Acc:1586017]
0.28581	1.39747	0.467436	0.646547	0.999831	-4.62743	ENSRNOG00000000257	Smpd3	sphingomyelin phosphodiesterase 3 [Source:RGD Symbol;Acc:619754]
0.285287	4.71206	0.679242	0.506778	0.999831	-4.76591	ENSRNOG00000010153	Raf1	Raf-1 proto-oncogene, serine/threonine kinase [Source:RGD Symbol;Acc:3531]
0.284955	3.56733	1.37708	0.187618	0.999831	-4.49585	ENSRNOG00000022039	Zbtb40	zinc finger and BTB domain containing 40 [Source:RGD Symbol;Acc:1309866]
0.284719	1.8602	0.917753	0.372496	0.999831	-4.60626	ENSRNOG00000050424	NA	NA
0.284521	1.57875	0.223429	0.826054	0.999831	-4.63602	ENSRNOG00000031222	RGD1561327	similar to melanoma antigen family A, 10 [Source:RGD Symbol;Acc:1561327]
0.284374	1.57169	1.43819	0.169824	0.999831	-4.54855	ENSRNOG00000007683	Prdm13	PR/SET domain 13 [Source:RGD Symbol;Acc:1589883]
0.284279	3.73379	0.908999	0.376959	0.999831	-4.68471	ENSRNOG00000017919	Nup133	nucleoporin 133 [Source:RGD Symbol;Acc:1307827]
0.284271	2.15442	1.21673	0.241508	0.999831	-4.57297	ENSRNOG00000033520	Wdr97	WD repeat domain 97 [Source:RGD Symbol;Acc:1562063]
0.28405	3.13029	0.806223	0.432039	0.999831	-4.67024	ENSRNOG00000020742	Pcnx3	pecanex 3 [Source:RGD Symbol;Acc:1305529]
0.283582	1.23115	0.747657	0.46561	0.999831	-4.63701	ENSRNOG00000012727	Trpc7	transient receptor potential cation channel, subfamily C, member 7 [Source:RGD Symbol;Acc:628820]
0.282513	2.25981	0.627862	0.539032	0.999831	-4.63607	ENSRNOG00000018788	Btbd2	BTB domain containing 2 [Source:RGD Symbol;Acc:1566094]
0.2824	1.62999	0.777675	0.448208	0.999831	-4.61722	ENSRNOG00000016422	Klhl36	kelch-like family member 36 [Source:RGD Symbol;Acc:1561366]
0.28203	4.87733	0.997596	0.333455	0.999831	-4.65725	ENSRNOG00000021101	Sema6c	semaphorin 6C [Source:RGD Symbol;Acc:3659]
0.281935	3.5841	0.945989	0.358347	0.999831	-4.65057	ENSRNOG00000027204	Map6	microtubule-associated protein 6 [Source:RGD Symbol;Acc:61804]
0.281893	2.29683	0.827559	0.4202	0.999831	-4.62423	ENSRNOG00000001385	Plbd2	phospholipase B domain containing 2 [Source:RGD Symbol;Acc:708461]
0.28187	3.54883	0.984732	0.339543	0.999831	-4.6279	ENSRNOG00000003463	Srebf1	sterol regulatory element binding transcription factor 1 [Source:RGD Symbol;Acc:69423]
0.281526	2.26485	0.934214	0.364202	0.999831	-4.60969	ENSRNOG00000019281	Glmp	glycosylated lysosomal membrane protein [Source:RGD Symbol;Acc:1303130]
0.281474	3.87153	0.681239	0.505547	0.999831	-4.72404	ENSRNOG00000010434	Dync1li1	dynein cytoplasmic 1 light intermediate chain 1 [Source:RGD Symbol;Acc:71072]
0.281056	5.32792	1.26686	0.223496	0.999831	-4.55001	ENSRNOG00000030019	Atp1a1	ATPase Na+/K+ transporting subunit alpha 1 [Source:RGD Symbol;Acc:2167]
0.280984	2.14382	0.890301	0.386612	0.999831	-4.61649	ENSRNOG00000016748	Poll	DNA polymerase lambda [Source:RGD Symbol;Acc:1308053]
0.280318	0.902721	0.673599	0.510266	0.999831	-4.61381	ENSRNOG00000000763	RT1-M3-1	RT1 class Ib, locus M3, gene 1 [Source:RGD Symbol;Acc:3494]
0.280201	1.60763	1.36779	0.190451	0.999831	-4.54988	ENSRNOG00000006350	Tle6	TLE family member 6, subcortical maternal complex member [Source:RGD Symbol;Acc:1561530]
0.280071	2.68295	1.10863	0.284122	0.999831	-4.58451	ENSRNOG00000018118	Atad3a	ATPase family, AAA domain containing 3A [Source:RGD Symbol;Acc:1305964]
0.279421	4.7166	3.29993	0.00456477	0.999831	-3.0166	ENSRNOG00000009411	Chn2	chimerin 2 [Source:RGD Symbol;Acc:620140]
0.279173	1.84069	0.995509	0.334437	0.999831	-4.59947	ENSRNOG00000026604	Cercam	cerebral endothelial cell adhesion molecule [Source:RGD Symbol;Acc:1304778]
0.27865	3.17521	1.84019	0.0845329	0.999831	-4.28243	ENSRNOG00000001627	Abi3bp	ABI family member 3 binding protein [Source:RGD Symbol;Acc:1562717]
0.278586	7.68441	1.14254	0.270189	0.999831	-4.65051	ENSRNOG00000030963	LOC108351137	glyceraldehyde-3-phosphate dehydrogenase [Source:RGD Symbol;Acc:11369796]
0.27853	4.50204	2.48076	0.0247206	0.999831	-3.69839	ENSRNOG00000011000	Rims1	regulating synaptic membrane exocytosis 1 [Source:RGD Symbol;Acc:620000]
0.277582	4.04962	1.50921	0.15091	0.999831	-4.42296	ENSRNOG00000021292	Rbbp4-ps2	RB binding protein 4, chromatin remodeling factor, pseudogene 2 [Source:RGD Symbol;Acc:6489142]
0.277483	1.96232	1.60926	0.127283	0.999831	-4.49307	ENSRNOG00000023496	Entrep2	endosomal transmembrane epsin interactor 2 [Source:RGD Symbol;Acc:1592985]
0.277406	3.79551	1.78987	0.0925853	0.999831	-4.28364	ENSRNOG00000002932	Wdr19	WD repeat domain 19 [Source:RGD Symbol;Acc:1306997]
0.277067	5.29539	2.77643	0.0135651	0.999831	-3.37082	ENSRNOG00000014531	Hbs1l	HBS1-like translational GTPase [Source:RGD Symbol;Acc:1308509]
0.276885	1.02752	0.924896	0.368881	0.999831	-4.6005	ENSRNOG00000007455	Tmem132e	transmembrane protein 132E [Source:RGD Symbol;Acc:1565522]
0.276673	4.97896	1.16817	0.26	0.999831	-4.59414	ENSRNOG00000021871	Gcn1	GCN1 activator of EIF2AK4 [Source:RGD Symbol;Acc:1593434]
0.275978	2.85882	1.03218	0.317473	0.999831	-4.60379	ENSRNOG00000011530	Mindy4	MINDY lysine 48 deubiquitinase 4 [Source:RGD Symbol;Acc:1562590]
0.275795	2.30284	0.771562	0.451718	0.999831	-4.62644	ENSRNOG00000019812	Nr1h2	nuclear receptor subfamily 1, group H, member 2 [Source:RGD Symbol;Acc:61906]
0.275365	2.8593	0.920105	0.371303	0.999831	-4.6331	ENSRNOG00000039017	Naa50	N(alpha)-acetyltransferase 50, NatE catalytic subunit [Source:RGD Symbol;Acc:1310944]
0.275358	5.32177	1.48324	0.157612	0.999831	-4.41	ENSRNOG00000008022	Apaf1	apoptotic peptidase activating factor 1 [Source:RGD Symbol;Acc:620575]
0.275276	1.60774	0.716152	0.484311	0.999831	-4.63119	ENSRNOG00000009910	Swap70	switching B-cell complex subunit SWAP70 [Source:RGD Symbol;Acc:1305579]
0.274891	3.90657	1.52396	0.147211	0.999831	-4.42235	ENSRNOG00000017241	Dpcd	deleted in primary ciliary dyskinesia [Source:RGD Symbol;Acc:1307648]
0.27387	1.74477	0.702284	0.492683	0.999831	-4.61335	ENSRNOG00000048495	Rrp12	ribosomal RNA processing 12 [Source:RGD Symbol;Acc:1591867]
0.273751	2.48532	0.779073	0.447407	0.999831	-4.6409	ENSRNOG00000019804	NA	NA
0.273183	1.20755	1.21055	0.243803	0.999831	-4.57998	ENSRNOG00000008901	Coro2a	coronin 2A [Source:RGD Symbol;Acc:1309719]
0.272753	1.86031	0.178163	0.860851	0.999831	-4.62245	ENSRNOG00000030807	LOC100912427	nuclease-sensitive element-binding protein 1-like [Source:RGD Symbol;Acc:6486912]
0.2726	7.36721	2.06244	0.0559438	0.999831	-3.91503	ENSRNOG00000000397	Ccar1	cell division cycle and apoptosis regulator 1 [Source:RGD Symbol;Acc:1560358]
0.272411	2.10535	1.14368	0.269729	0.999831	-4.58168	ENSRNOG00000024364	Enkd1	enkurin domain containing 1 [Source:RGD Symbol;Acc:1307357]
0.272356	4.13096	0.917559	0.372595	0.999831	-4.67117	ENSRNOG00000017753	Ercc2	ERCC excision repair 2, TFIIH core complex helicase subunit [Source:RGD Symbol;Acc:1309109]
0.271877	3.67642	1.20527	0.245776	0.999831	-4.55847	ENSRNOG00000001113	Mmd2	monocyte to macrophage differentiation-associated 2 [Source:RGD Symbol;Acc:1306506]
0.271759	2.48118	1.58606	0.132463	0.999831	-4.45453	ENSRNOG00000006877	Efnb1	ephrin B1 [Source:RGD Symbol;Acc:2540]
0.271742	0.898088	0.271481	0.789523	0.999831	-4.61102	ENSRNOG00000036693	Slc25a10	solute carrier family 25 member 10 [Source:RGD Symbol;Acc:621430]
0.27121	3.26104	0.684466	0.503562	0.999831	-4.65213	ENSRNOG00000007141	Preb	prolactin regulatory element binding [Source:RGD Symbol;Acc:61929]
0.271183	3.99124	1.98406	0.0648352	0.999831	-4.11893	ENSRNOG00000030149	Adgrl3	adhesion G protein-coupled receptor L3 [Source:RGD Symbol;Acc:620836]
0.271131	1.77316	1.49379	0.154861	0.999831	-4.51245	ENSRNOG00000024577	Gamt	guanidinoacetate N-methyltransferase [Source:RGD Symbol;Acc:2659]
0.270761	5.47216	1.29794	0.212871	0.999831	-4.53126	ENSRNOG00000027791	AABR07015346.1	cytochrome c oxidase subunit 7A2 [Source:RGD Symbol;Acc:68365]
0.270626	2.58367	1.34127	0.198728	0.999831	-4.53768	ENSRNOG00000011094	Efcab6	EF-hand calcium binding domain 6 [Source:RGD Symbol;Acc:1309065]
0.270614	3.94191	1.70643	0.107431	0.999831	-4.31601	ENSRNOG00000019497	Mrpl17	mitochondrial ribosomal protein L17 [Source:RGD Symbol;Acc:70943]
0.270221	7.23758	1.34075	0.198893	0.999831	-4.5132	ENSRNOG00000006116	Hk2	hexokinase 2 [Source:RGD Symbol;Acc:2797]
0.270147	3.81981	1.03637	0.315575	0.999831	-4.62401	ENSRNOG00000016255	Podxl2	podocalyxin-like 2 [Source:RGD Symbol;Acc:1305815]
0.269916	2.00711	1.33319	0.201307	0.999831	-4.54301	ENSRNOG00000018712	Camk2a	calcium/calmodulin-dependent protein kinase II alpha [Source:RGD Symbol;Acc:2261]
0.269887	3.20381	0.990147	0.33697	0.999831	-4.62211	ENSRNOG00000003494	Ppfia4	PTPRF interacting protein alpha 4 [Source:RGD Symbol;Acc:620055]
0.269207	1.9281	0.638576	0.532214	0.999831	-4.62468	ENSRNOG00000001429	Lrwd1	leucine-rich repeats and WD repeat domain containing 1 [Source:RGD Symbol;Acc:1359442]
0.268959	2.52756	0.693212	0.498205	0.999831	-4.66535	ENSRNOG00000048470	NA	NA
0.268581	4.85482	1.32381	0.204332	0.999831	-4.50871	ENSRNOG00000011414	Psmc3	proteasome 26S subunit, ATPase 3 [Source:RGD Symbol;Acc:61905]
0.268234	5.74274	1.53796	0.143772	0.999831	-4.37227	ENSRNOG00000042289	Plcxd2	phosphatidylinositol-specific phospholipase C, X domain containing 2 [Source:RGD Symbol;Acc:1563504]
0.267976	2.41677	1.10348	0.286284	0.999831	-4.58546	ENSRNOG00000046479	Chaf1a	chromatin assembly factor 1 subunit A [Source:RGD Symbol;Acc:1590865]
0.267878	3.45624	0.639004	0.531942	0.999831	-4.71279	ENSRNOG00000042932	Ttc27	tetratricopeptide repeat domain 27 [Source:RGD Symbol;Acc:1305264]
0.267643	11.4553	3.97971	0.00109407	0.999831	-2.3348	ENSRNOG00000049560	Glul	glutamate-ammonia ligase [Source:RGD Symbol;Acc:2710]
0.267632	3.08656	1.34749	0.196762	0.999831	-4.51365	ENSRNOG00000043350	Cap2	cyclase associated actin cytoskeleton regulatory protein 2 [Source:RGD Symbol;Acc:620310]
0.267241	3.23844	2.15238	0.0471213	0.999831	-4.13652	ENSRNOG00000003549	Cnpy2	canopy FGF signaling regulator 2 [Source:RGD Symbol;Acc:1589072]
0.267121	2.76149	1.64874	0.118866	0.999831	-4.42887	ENSRNOG00000028254	Tmem141	transmembrane protein 141 [Source:RGD Symbol;Acc:1561492]
0.2666	4.42453	1.24233	0.232174	0.999831	-4.54933	ENSRNOG00000008831	Hcn2	hyperpolarization activated cyclic nucleotide gated potassium and sodium channel 2 [Source:RGD Symbol;Acc:620689]
0.266527	4.03792	0.587133	0.565381	0.999831	-4.74474	ENSRNOG00000011156	Clstn3	calsyntenin 3 [Source:RGD Symbol;Acc:621153]
0.266316	2.67051	1.88104	0.0784581	0.999831	-4.3414	ENSRNOG00000003088	Arhgap31	Rho GTPase activating protein 31 [Source:RGD Symbol;Acc:1306093]
0.266214	0.858118	0.581855	0.568845	0.999831	-4.61396	ENSRNOG00000029886	Hba-a1	hemoglobin alpha, adult chain 1 [Source:RGD Symbol;Acc:2782]
0.265712	5.29313	1.74677	0.100013	0.999831	-4.2244	ENSRNOG00000014903	Zfyve27	zinc finger FYVE-type containing 27 [Source:RGD Symbol;Acc:735177]
0.264897	2.66717	0.57805	0.571348	0.999831	-4.67411	ENSRNOG00000015191	Phc1	polyhomeotic homolog 1 [Source:RGD Symbol;Acc:1309203]
0.264818	0.952944	0.627192	0.53946	0.999831	-4.61112	ENSRNOG00000021147	Bad	BCL2-associated agonist of cell death [Source:RGD Symbol;Acc:620103]
0.264767	2.16869	1.28354	0.217743	0.999831	-4.55189	ENSRNOG00000002969	Itpkb	inositol-trisphosphate 3-kinase B [Source:RGD Symbol;Acc:2932]
0.264711	5.17486	1.63316	0.122129	0.999831	-4.30299	ENSRNOG00000027770	Trpm3	transient receptor potential cation channel, subfamily M, member 3 [Source:RGD Symbol;Acc:1304888]
0.264469	2.77351	1.0281	0.319328	0.999831	-4.61507	ENSRNOG00000011310	Pde10a	phosphodiesterase 10A [Source:RGD Symbol;Acc:68434]
0.264434	5.48297	1.86147	0.0813181	0.999831	-4.11114	ENSRNOG00000042220	Vsx1	visual system homeobox 1 [Source:RGD Symbol;Acc:1305667]
0.263968	4.51692	1.49411	0.154777	0.999831	-4.40776	ENSRNOG00000004221	Lgr5	leucine rich repeat containing G protein coupled receptor 5 [Source:RGD Symbol;Acc:1307733]
0.263964	2.78362	1.05832	0.305764	0.999831	-4.59631	ENSRNOG00000022289	Aip	aryl-hydrocarbon receptor-interacting protein [Source:RGD Symbol;Acc:628619]
0.263617	1.50579	0.987195	0.338371	0.999831	-4.60774	ENSRNOG00000011980	Lrrc7	leucine rich repeat containing 7 [Source:RGD Symbol;Acc:708527]
0.263601	0.220314	0.137559	0.89232	0.999831	-4.59939	ENSRNOG00000015476	Ubxn11	UBX domain protein 11 [Source:RGD Symbol;Acc:620769]
0.263214	5.77921	1.48816	0.156324	0.999831	-4.40623	ENSRNOG00000002886	Myh10	myosin heavy chain 10 [Source:RGD Symbol;Acc:71000]
0.263124	6.62591	1.96225	0.0675269	0.999831	-4.01173	ENSRNOG00000020361	Ip6k2	inositol hexakisphosphate kinase 2 [Source:RGD Symbol;Acc:620529]
0.263038	3.66212	1.47536	0.159693	0.999831	-4.45081	ENSRNOG00000031233	Mapk12	mitogen-activated protein kinase 12 [Source:RGD Symbol;Acc:70975]
0.262999	2.64719	1.84087	0.0844276	0.999831	-4.34174	ENSRNOG00000053347	Ccdc28a	coiled-coil domain containing 28A [Source:RGD Symbol;Acc:1310326]
0.262827	5.5843	1.25771	0.226701	0.999831	-4.55447	ENSRNOG00000023238	Dgkd	diacylglycerol kinase, delta [Source:RGD Symbol;Acc:1563309]
0.262806	2.53879	1.69562	0.109498	0.999831	-4.41584	ENSRNOG00000056012	Syt16	synaptotagmin 16 [Source:RGD Symbol;Acc:1564654]
0.262698	3.00549	2.37023	0.0308053	0.999831	-4.07928	ENSRNOG00000012593	Mmel1	membrane metallo-endopeptidase-like 1 [Source:RGD Symbol;Acc:1309299]
0.262642	1.35903	0.602939	0.555075	0.999831	-4.61418	ENSRNOG00000028753	B9d2	B9 domain containing 2 [Source:RGD Symbol;Acc:1566122]
0.262544	1.96557	0.850018	0.407966	0.999831	-4.61936	ENSRNOG00000011285	Zdhhc22	zinc finger DHHC-type palmitoyltransferase 22 [Source:RGD Symbol;Acc:1308446]
0.262218	3.27406	0.585124	0.566698	0.999831	-4.6756	ENSRNOG00000003033	Plcd3	phospholipase C, delta 3 [Source:RGD Symbol;Acc:1310903]
0.262175	8.81556	0.798192	0.43655	0.999831	-4.83539	ENSRNOG00000048682	Zwint	ZW10 interacting kinetochore protein [Source:RGD Symbol;Acc:628671]
0.262088	4.79977	1.04753	0.310561	0.999831	-4.66217	ENSRNOG00000026962	Osbpl8	oxysterol binding protein-like 8 [Source:RGD Symbol;Acc:1561474]
0.262035	3.00789	1.23889	0.23341	0.999831	-4.54723	ENSRNOG00000031916	Timeless	timeless circadian regulator [Source:RGD Symbol;Acc:620939]
0.261969	2.10871	1.27837	0.219515	0.999831	-4.55499	ENSRNOG00000007454	Aloxe3	arachidonate lipoxygenase 3 [Source:RGD Symbol;Acc:1306252]
0.261815	4.18691	1.16397	0.261649	0.999831	-4.58299	ENSRNOG00000042915	Mxra7	matrix remodeling associated 7 [Source:RGD Symbol;Acc:1594666]
0.261534	2.57048	0.936582	0.363019	0.999831	-4.61655	ENSRNOG00000000501	Zfp523	zinc finger protein 523 [Source:RGD Symbol;Acc:1306239]
0.261404	2.5249	0.926537	0.368054	0.999831	-4.61693	ENSRNOG00000017108	Syngr1	synaptogyrin 1 [Source:RGD Symbol;Acc:3801]
0.26096	3.23644	0.932802	0.364908	0.999831	-4.63364	ENSRNOG00000012295	Pla2g6	phospholipase A2 group VI [Source:RGD Symbol;Acc:628867]
0.260702	4.46656	0.833836	0.416757	0.999831	-4.71985	ENSRNOG00000032635	Rpl8	ribosomal protein L8 [Source:RGD Symbol;Acc:619827]
0.260699	3.19776	1.82204	0.0873625	0.999831	-4.29316	ENSRNOG00000019036	Ldhd	lactate dehydrogenase D [Source:RGD Symbol;Acc:1308107]
0.260479	4.81453	1.09201	0.29114	0.999831	-4.62988	ENSRNOG00000008725	Slc37a3	solute carrier family 37, member 3 [Source:RGD Symbol;Acc:1310346]
0.260315	6.8173	0.943031	0.359811	0.999831	-4.75849	ENSRNOG00000014254	Cpt1a	carnitine palmitoyltransferase 1A [Source:RGD Symbol;Acc:2396]
0.260149	1.95093	1.09411	0.290247	0.999831	-4.58754	ENSRNOG00000051531	Ctu2	cytosolic thiouridylase subunit 2 [Source:RGD Symbol;Acc:1562594]
0.260117	2.82482	1.32064	0.205365	0.999831	-4.52684	ENSRNOG00000008178	Nxn	nucleoredoxin [Source:RGD Symbol;Acc:1310489]
0.259944	4.13038	2.728	0.0149809	0.999831	-3.59021	ENSRNOG00000000599	Lama4	laminin subunit alpha 4 [Source:RGD Symbol;Acc:1560062]
0.259743	3.31999	0.979066	0.342249	0.999831	-4.6346	ENSRNOG00000001276	Pcnt	pericentrin [Source:RGD Symbol;Acc:1595865]
0.25956	3.68251	2.33098	0.0332868	0.999831	-3.97175	ENSRNOG00000001823	St6gal1	ST6 beta-galactoside alpha-2,6-sialyltransferase 1 [Source:RGD Symbol;Acc:3676]
0.259525	2.8234	0.89559	0.383865	0.999831	-4.65943	ENSRNOG00000004137	Ubtd2	ubiquitin domain containing 2 [Source:RGD Symbol;Acc:1305506]
0.259463	1.99763	0.940429	0.361103	0.999831	-4.60661	ENSRNOG00000042094	Prr13	proline rich 13 [Source:RGD Symbol;Acc:1307129]
0.25914	3.06466	1.58552	0.132585	0.999831	-4.45205	ENSRNOG00000014909	Sh2d5	SH2 domain containing 5 [Source:RGD Symbol;Acc:1305952]
0.258866	3.31577	0.831834	0.417853	0.999831	-4.66951	ENSRNOG00000018847	Stx5	syntaxin 5 [Source:RGD Symbol;Acc:68426]
0.25872	4.85518	1.18767	0.252448	0.999831	-4.58351	ENSRNOG00000025731	LOC100359583	hypothetical protein LOC100359583 [Source:RGD Symbol;Acc:2323611]
0.258568	3.03752	1.45138	0.166168	0.999831	-4.4705	ENSRNOG00000006916	Sardh	sarcosine dehydrogenase [Source:RGD Symbol;Acc:621125]
0.258566	3.87008	0.649266	0.525459	0.999831	-4.75705	ENSRNOG00000003191	Gprasp3	G protein-coupled receptor associated sorting protein family member 3 [Source:RGD Symbol;Acc:1303224]
0.258108	3.38029	0.980053	0.341776	0.999831	-4.63163	ENSRNOG00000049336	Lime1	Lck interacting transmembrane adaptor 1 [Source:RGD Symbol;Acc:1562795]
0.258011	2.68274	1.42397	0.173833	0.999831	-4.50124	ENSRNOG00000014761	Rasd2	RASD family, member 2 [Source:RGD Symbol;Acc:628594]
0.257908	2.58141	1.38787	0.18437	0.999831	-4.50651	ENSRNOG00000014783	Pgghg	protein-glucosylgalactosylhydroxylysine glucosidase [Source:RGD Symbol;Acc:1306015]
0.257343	1.83426	1.17396	0.257741	0.999831	-4.57625	ENSRNOG00000039658	G4	G4 protein [Source:RGD Symbol;Acc:1303038]
0.257108	2.68989	2.21478	0.0417737	0.999831	-4.22116	ENSRNOG00000013596	Dimt1	DIM1 rRNA methyltransferase and ribosome maturation factor [Source:RGD Symbol;Acc:1311752]
0.257089	2.55503	0.743299	0.468171	0.999831	-4.66737	ENSRNOG00000047211	Fzd3	frizzled class receptor 3 [Source:RGD Symbol;Acc:628814]
0.25707	2.94969	1.01701	0.324415	0.999831	-4.60807	ENSRNOG00000011507	Pick1	protein interacting with PRKCA 1 [Source:RGD Symbol;Acc:69437]
0.256769	1.2047	0.453602	0.656261	0.999831	-4.6192	ENSRNOG00000019924	Thop1	thimet oligopeptidase 1 [Source:RGD Symbol;Acc:68330]
0.256368	4.97891	1.20312	0.246584	0.999831	-4.57245	ENSRNOG00000050410	Snrpd3	small nuclear ribonucleoprotein D3 polypeptide [Source:RGD Symbol;Acc:1597573]
0.256356	3.17439	1.27994	0.218973	0.999831	-4.53774	ENSRNOG00000059215	Slc66a2	solute carrier family 66 member 2 [Source:RGD Symbol;Acc:1305223]
0.255954	0.711699	0.187272	0.853822	0.999831	-4.60487	ENSRNOG00000018967	Wdr59	WD repeat domain 59 [Source:RGD Symbol;Acc:1592213]
0.255351	5.86711	2.07355	0.0547775	0.999831	-3.92667	ENSRNOG00000009894	Vps50	VPS50 subunit of EARP/GARPII complex [Source:RGD Symbol;Acc:1304751]
0.255314	2.92567	1.11322	0.282204	0.999831	-4.58654	ENSRNOG00000019772	Dnpep	aspartyl aminopeptidase [Source:RGD Symbol;Acc:1583848]
0.255231	4.27358	0.987662	0.338149	0.999831	-4.6513	ENSRNOG00000037613	Kdm6b	lysine demethylase 6B [Source:RGD Symbol;Acc:1307629]
0.254834	2.82817	0.98928	0.337381	0.999831	-4.61792	ENSRNOG00000048282	Mpnd	MPN domain containing [Source:RGD Symbol;Acc:1589335]
0.254559	9.43929	0.542062	0.595312	0.999831	-4.93695	ENSRNOG00000008195	Ywhaz	tyrosine 3-monooxygenase/tryptophan 5-monooxygenase activation protein, zeta [Source:RGD Symbol;Acc:3980]
0.254463	4.44819	2.18118	0.0445788	0.999831	-3.96064	ENSRNOG00000005561	Brinp1	BMP/retinoic acid inducible neural specific 1 [Source:RGD Symbol;Acc:708519]
0.254424	1.71693	0.687884	0.501465	0.999831	-4.61991	ENSRNOG00000001396	Mospd3	motile sperm domain containing 3 [Source:RGD Symbol;Acc:1304973]
0.254394	1.98101	1.54648	0.141709	0.999831	-4.50201	ENSRNOG00000053353	Snord7	small nucleolar RNA, C/D box 7 [Source:RGD Symbol;Acc:40983522]
0.253816	2.22311	0.996107	0.334156	0.999831	-4.60348	ENSRNOG00000019609	B4galt2	beta-1,4-galactosyltransferase 2 [Source:RGD Symbol;Acc:1305358]
0.253799	2.7906	1.33437	0.200927	0.999831	-4.53604	ENSRNOG00000028047	Mecr	mitochondrial trans-2-enoyl-CoA reductase [Source:RGD Symbol;Acc:3208]
0.253756	4.02339	0.915845	0.373466	0.999831	-4.68407	ENSRNOG00000006999	Dnai4	dynein axonemal intermediate chain 4 [Source:RGD Symbol;Acc:1311027]
0.253592	5.27568	2.45031	0.0262727	0.999831	-3.64655	ENSRNOG00000009740	Slco1c1	solute carrier organic anion transporter family, member 1c1 [Source:RGD Symbol;Acc:628660]
0.25357	3.1208	1.18164	0.254765	0.999831	-4.56794	ENSRNOG00000022178	Dcdc1-ps1	doublecortin domain containing 1, pseudogene 1 [Source:RGD Symbol;Acc:1562221]
0.25287	3.54716	0.79432	0.438735	0.999831	-4.67754	ENSRNOG00000047280	NA	NA
0.252733	5.40636	2.47876	0.0248199	0.999831	-3.61358	ENSRNOG00000010090	Ccdc174	coiled-coil domain containing 174 [Source:RGD Symbol;Acc:1305225]
0.252669	2.83671	3.27946	0.00476516	0.999831	-3.66721	ENSRNOG00000003276	Myo1d	myosin ID [Source:RGD Symbol;Acc:621321]
0.252654	4.70664	1.15836	0.263863	0.999831	-4.59436	ENSRNOG00000017905	Map1lc3b	microtubule-associated protein 1 light chain 3 beta [Source:RGD Symbol;Acc:621315]
0.252488	2.96272	0.840802	0.412958	0.999831	-4.64113	ENSRNOG00000020178	Cope	COPI coat complex subunit epsilon [Source:RGD Symbol;Acc:1306785]
0.252381	3.10935	1.25693	0.226977	0.999831	-4.54249	ENSRNOG00000010219	Ralgds	ral guanine nucleotide dissociation stimulator [Source:RGD Symbol;Acc:3533]
0.252346	4.01904	2.00527	0.0623109	0.999831	-4.11956	ENSRNOG00000047261	NA	NA
0.25233	1.69723	0.707857	0.489308	0.999831	-4.62032	ENSRNOG00000047307	Cntfr	ciliary neurotrophic factor receptor [Source:RGD Symbol;Acc:1303100]
0.252081	2.51801	1.02409	0.32116	0.999831	-4.60039	ENSRNOG00000037476	Galnt9	polypeptide N-acetylgalactosaminyltransferase 9 [Source:RGD Symbol;Acc:1311523]
0.251542	2.14164	0.981418	0.341124	0.999831	-4.6068	ENSRNOG00000028749	Atxn7l2	ataxin 7-like 2 [Source:RGD Symbol;Acc:1307047]
0.251255	6.53293	1.09022	0.291907	0.999831	-4.68521	ENSRNOG00000007998	Ssb	small RNA binding exonuclease protection factor La [Source:RGD Symbol;Acc:620804]
0.251207	3.34523	0.939096	0.361766	0.999831	-4.63245	ENSRNOG00000017513	Miga2	mitoguardin 2 [Source:RGD Symbol;Acc:1310887]
0.250734	5.66217	0.990085	0.337	0.999831	-4.72862	ENSRNOG00000013422	Med23	mediator complex subunit 23 [Source:RGD Symbol;Acc:1307671]
0.250616	1.87448	1.38789	0.184363	0.999831	-4.54236	ENSRNOG00000015049	Scn5a	sodium voltage-gated channel alpha subunit 5 [Source:RGD Symbol;Acc:3637]
0.250353	2.06684	0.767204	0.454232	0.999831	-4.64732	ENSRNOG00000019138	Clec11a	C-type lectin domain containing 11A [Source:RGD Symbol;Acc:3627]
0.250007	2.47822	1.28695	0.216579	0.999831	-4.54812	ENSRNOG00000009134	Mad2l2	mitotic arrest deficient 2 like 2 [Source:RGD Symbol;Acc:1307499]
0.249771	3.57667	1.93098	0.0715623	0.999831	-4.21454	ENSRNOG00000014354	Cep95	centrosomal protein 95 [Source:RGD Symbol;Acc:1309655]
0.249661	2.27368	1.34042	0.198997	0.999831	-4.52657	ENSRNOG00000058652	Akp3	alkaline phosphatase 3, intestine, not Mn requiring [Source:RGD Symbol;Acc:621650]
0.24955	2.06578	1.78618	0.0932019	0.999831	-4.42489	ENSRNOG00000060603	Nhsl1	NHS-like 1 [Source:RGD Symbol;Acc:1308124]
0.249482	4.94358	2.29223	0.0359197	0.999831	-3.81726	ENSRNOG00000017990	Ubap2l	ubiquitin associated protein 2-like [Source:RGD Symbol;Acc:1308707]
0.249276	3.20128	1.96783	0.0668295	0.999831	-4.27403	ENSRNOG00000000432	Fkbpl	FKBP prolyl isomerase like [Source:RGD Symbol;Acc:1303227]
0.249151	5.08895	0.632137	0.536305	0.999831	-4.77422	ENSRNOG00000022373	Dennd4b	DENN domain containing 4B [Source:RGD Symbol;Acc:1560320]
0.248795	3.44537	0.644164	0.528677	0.999831	-4.69941	ENSRNOG00000049575	NA	NA
0.248767	1.75887	1.12597	0.276929	0.999831	-4.58287	ENSRNOG00000022144	LOC100361993	transmembrane protein 14C [Source:RGD Symbol;Acc:2319087]
0.248532	1.59103	0.37188	0.714904	0.999831	-4.61711	ENSRNOG00000019900	Slc35b2	solute carrier family 35 member B2 [Source:RGD Symbol;Acc:1565318]
0.248253	3.88969	1.17337	0.25797	0.999831	-4.576	ENSRNOG00000006874	Opn1sw	opsin 1, short wave sensitive [Source:RGD Symbol;Acc:621033]
0.248141	2.70742	1.7575	0.0981167	0.999831	-4.39699	ENSRNOG00000006311	Ccr9	C-C motif chemokine receptor 9 [Source:RGD Symbol;Acc:628750]
0.248111	2.99419	1.53629	0.144178	0.999831	-4.41593	ENSRNOG00000018509	Cx3cr1	C-X3-C motif chemokine receptor 1 [Source:RGD Symbol;Acc:620137]
0.248045	2.99477	1.71303	0.106186	0.999831	-4.34657	ENSRNOG00000042536	Pde4d	phosphodiesterase 4D [Source:RGD Symbol;Acc:3281]
0.24801	3.20345	1.15508	0.265167	0.999831	-4.58098	ENSRNOG00000009533	Erich3	glutamate-rich 3 [Source:RGD Symbol;Acc:1593279]
0.247222	2.0519	0.708159	0.489125	0.999831	-4.63171	ENSRNOG00000022804	Foxp4	forkhead box P4 [Source:RGD Symbol;Acc:1311386]
0.247166	2.59197	0.643634	0.529012	0.999831	-4.67908	ENSRNOG00000010298	Xbp1	X-box binding protein 1 [Source:RGD Symbol;Acc:1303073]
0.246753	2.85141	0.574069	0.573974	0.999831	-4.67041	ENSRNOG00000025832	Zer1	zyg-11 related, cell cycle regulator [Source:RGD Symbol;Acc:1310284]
0.246671	4.53356	1.10959	0.283717	0.999831	-4.62533	ENSRNOG00000060946	Cask	calcium/calmodulin dependent serine protein kinase [Source:RGD Symbol;Acc:62004]
0.246486	6.25432	2.05365	0.0568819	0.999831	-3.94171	ENSRNOG00000016532	Ino80c	INO80 complex subunit C [Source:RGD Symbol;Acc:1310199]
0.246381	4.45404	1.74097	0.101051	0.999831	-4.2607	ENSRNOG00000009613	Sh3bgrl2	SH3 domain binding glutamate-rich protein like 2 [Source:RGD Symbol;Acc:1591931]
0.246016	2.75839	1.04024	0.313827	0.999831	-4.60204	ENSRNOG00000025370	Zfp385c	zinc finger protein 385C [Source:RGD Symbol;Acc:1563442]
0.245766	4.20914	0.840314	0.413223	0.999831	-4.70687	ENSRNOG00000002203	Lin54	lin-54 DREAM MuvB core complex component [Source:RGD Symbol;Acc:1311361]
0.245666	2.59016	1.32916	0.202601	0.999831	-4.52728	ENSRNOG00000024616	NA	NA
0.245186	3.64159	0.707244	0.489679	0.999831	-4.69024	ENSRNOG00000018168	Klc4	kinesin light chain 4 [Source:RGD Symbol;Acc:1306555]
0.244908	3.52714	0.623584	0.541767	0.999831	-4.75546	ENSRNOG00000001662	Dyrk1a	dual specificity tyrosine phosphorylation regulated kinase 1A [Source:RGD Symbol;Acc:2528]
0.244906	4.08355	2.1019	0.0519013	0.999831	-4.0768	ENSRNOG00000020717	Bod1	biorientation of chromosomes in cell division 1 [Source:RGD Symbol;Acc:1305622]
0.244643	1.57988	0.493341	0.628534	0.999831	-4.64947	ENSRNOG00000010616	Ndor1	NADPH dependent diflavin oxidoreductase 1 [Source:RGD Symbol;Acc:1308479]
0.244608	4.01872	1.40352	0.179739	0.999831	-4.46974	ENSRNOG00000002151	NA	NA
0.243961	1.89094	2.16496	0.0459947	0.999831	-4.31856	ENSRNOG00000027125	Mboat1	membrane bound O-acyltransferase domain containing 1 [Source:RGD Symbol;Acc:1565561]
0.243899	2.90852	0.66473	0.515774	0.999831	-4.67113	ENSRNOG00000020005	Map2k2	mitogen activated protein kinase kinase 2 [Source:RGD Symbol;Acc:61888]
0.243895	2.83544	0.625835	0.540327	0.999831	-4.6694	ENSRNOG00000024349	Cbarp	CACN subunit beta associated regulatory protein [Source:RGD Symbol;Acc:1307185]
0.243722	3.02994	2.13538	0.0486844	0.999831	-4.19457	ENSRNOG00000018812	Rpp25	ribonuclease P and MRP subunit p25 [Source:RGD Symbol;Acc:1305290]
0.243343	2.26189	1.46293	0.163022	0.999831	-4.51277	ENSRNOG00000023020	Fdx2	ferredoxin 2 [Source:RGD Symbol;Acc:1561264]
0.243305	2.22082	0.716849	0.483893	0.999831	-4.65207	ENSRNOG00000025604	Atad2	ATPase family, AAA domain containing 2 [Source:RGD Symbol;Acc:1304849]
0.24298	2.15241	1.9136	0.0738988	0.999831	-4.40165	ENSRNOG00000046445	Rcor3	REST corepressor 3 [Source:RGD Symbol;Acc:1593864]
0.242917	1.32954	0.936273	0.363173	0.999831	-4.60093	ENSRNOG00000003189	Cited1	Cbp/p300-interacting transactivator with Glu/Asp-rich carboxy-terminal domain 1 [Source:RGD Symbol;Acc:620781]
0.242844	4.72629	1.50012	0.153228	0.999831	-4.40375	ENSRNOG00000032391	Esyt2	extended synaptotagmin 2 [Source:RGD Symbol;Acc:1565705]
0.242659	4.76765	2.57596	0.020411	0.999831	-3.63242	ENSRNOG00000042359	Pigk	phosphatidylinositol glycan anchor biosynthesis, class K [Source:RGD Symbol;Acc:1306753]
0.242174	5.9367	1.21037	0.243868	0.999831	-4.59579	ENSRNOG00000017333	Syt4	synaptotagmin 4 [Source:RGD Symbol;Acc:68397]
0.242009	3.79879	1.35061	0.195781	0.999831	-4.50148	ENSRNOG00000049952	Gucd1	guanylyl cyclase domain containing 1 [Source:RGD Symbol;Acc:1597571]
0.241753	6.03206	1.54228	0.142723	0.999831	-4.37001	ENSRNOG00000018528	Nrl	neural retina leucine zipper [Source:RGD Symbol;Acc:1305197]
0.241491	1.56168	0.851271	0.40729	0.999831	-4.61171	ENSRNOG00000008674	Prdm11	PR/SET domain 11 [Source:RGD Symbol;Acc:1597330]
0.241089	2.8152	0.69039	0.49993	0.999831	-4.66513	ENSRNOG00000002963	C1ql1	complement C1q like 1 [Source:RGD Symbol;Acc:1306039]
0.240768	2.34868	0.852536	0.406609	0.999831	-4.61397	ENSRNOG00000015641	Exoc3l1	exocyst complex component 3-like 1 [Source:RGD Symbol;Acc:1311132]
0.240243	1.45407	0.73963	0.470333	0.999831	-4.62372	ENSRNOG00000004063	Sh3pxd2b	SH3 and PX domains 2B [Source:RGD Symbol;Acc:1309926]
0.240119	3.03888	0.731394	0.475208	0.999831	-4.66789	ENSRNOG00000050492	NA	NA
0.240105	1.67864	0.747922	0.465455	0.999831	-4.62039	ENSRNOG00000022153	Tmem134	transmembrane protein 134 [Source:RGD Symbol;Acc:1305824]
0.24009	5.30943	0.882255	0.390816	0.999831	-4.73685	ENSRNOG00000001214	Pfkl	phosphofructokinase, liver type [Source:RGD Symbol;Acc:3311]
0.240073	5.60488	0.881689	0.391113	0.999831	-4.75629	ENSRNOG00000012477	NA	NA
0.239903	2.20455	1.47353	0.16018	0.999831	-4.50546	ENSRNOG00000000478	AA926063	AA926063gene [Source:RGD Symbol;Acc:1303072]
0.23978	4.57919	1.61427	0.126188	0.999831	-4.34095	ENSRNOG00000003026	Rad23a	RAD23 homolog A, nucleotide excision repair protein [Source:RGD Symbol;Acc:1309899]
0.239625	2.29325	0.891558	0.385958	0.999831	-4.61666	ENSRNOG00000042274	Fbxo31	F-box protein 31 [Source:RGD Symbol;Acc:1561069]
0.239586	4.23974	1.30016	0.212127	0.999831	-4.51938	ENSRNOG00000037165	Nipal3	NIPA-like domain containing 3 [Source:RGD Symbol;Acc:1563439]
0.239389	1.23971	0.629256	0.538142	0.999831	-4.61575	ENSRNOG00000025584	Agap2	ArfGAP with GTPase domain, ankyrin repeat and PH domain 2 [Source:RGD Symbol;Acc:628844]
0.239358	3.33397	0.949531	0.356598	0.999831	-4.63339	ENSRNOG00000003542	Hcfc1r1	host cell factor C1 regulator 1 [Source:RGD Symbol;Acc:727975]
0.239221	2.27617	1.08291	0.295041	0.999831	-4.58904	ENSRNOG00000038106	Map1lc3b2	microtubule-associated protein 1 light chain 3 beta 2 [Source:RGD Symbol;Acc:2323116]
0.239143	3.01273	1.02289	0.321711	0.999831	-4.61436	ENSRNOG00000010435	Nup42	nucleoporin 42 [Source:RGD Symbol;Acc:1560934]
0.239023	4.08386	1.26138	0.225411	0.999831	-4.53752	ENSRNOG00000048622	Sin3b	SIN3 transcription regulator family member B [Source:RGD Symbol;Acc:1587989]
0.239021	1.97699	0.660503	0.518411	0.999831	-4.64516	ENSRNOG00000030127	Eml2	EMAP like 2 [Source:RGD Symbol;Acc:621066]
0.238573	3.19937	1.15137	0.266646	0.999831	-4.57546	ENSRNOG00000021102	Scn1b	sodium voltage-gated channel beta subunit 1 [Source:RGD Symbol;Acc:3631]
0.238504	3.3314	0.915965	0.373405	0.999831	-4.64222	ENSRNOG00000009324	Wdr54	WD repeat domain 54 [Source:RGD Symbol;Acc:1561494]
0.238481	2.77202	1.48755	0.156482	0.999831	-4.47569	ENSRNOG00000031912	Rpl7-ps3	ribosomal protein L7, pseudogene 3 [Source:RGD Symbol;Acc:1359341]
0.238459	4.79272	1.73974	0.101273	0.999831	-4.24109	ENSRNOG00000045639	RGD1560883	similar to KIAA0825 protein [Source:RGD Symbol;Acc:1560883]
0.238449	3.19171	0.86487	0.400004	0.999831	-4.65349	ENSRNOG00000019915	Xrcc1	X-ray repair cross complementing 1 [Source:RGD Symbol;Acc:619823]
0.237451	6.62649	0.733401	0.474017	0.999831	-4.85756	ENSRNOG00000009378	Rpl4	ribosomal protein L4 [Source:RGD Symbol;Acc:619824]
0.237426	4.59462	0.927853	0.367392	0.999831	-4.73284	ENSRNOG00000004556	Dcaf5	DDB1 and CUL4 associated factor 5 [Source:RGD Symbol;Acc:1306535]
0.237287	3.45588	0.897603	0.382823	0.999831	-4.64631	ENSRNOG00000003149	Farsa	phenylalanyl-tRNA synthetase subunit alpha [Source:RGD Symbol;Acc:1310314]
0.237274	2.79427	0.895827	0.383742	0.999831	-4.63808	ENSRNOG00000012531	Ephb2	Eph receptor B2 [Source:RGD Symbol;Acc:1564232]
0.237272	1.48597	0.545545	0.59297	0.999831	-4.62567	ENSRNOG00000028261	Tppp	tubulin polymerization promoting protein [Source:RGD Symbol;Acc:1310121]
0.237268	3.89015	1.74438	0.100439	0.999831	-4.29609	ENSRNOG00000012472	Pyroxd1	pyridine nucleotide-disulphide oxidoreductase domain 1 [Source:RGD Symbol;Acc:1303253]
0.237083	3.46671	1.3733	0.188765	0.999831	-4.49562	ENSRNOG00000060561	Gdpd1	glycerophosphodiester phosphodiesterase domain containing 1 [Source:RGD Symbol;Acc:1311813]
0.23705	2.65917	1.03088	0.318064	0.999831	-4.60126	ENSRNOG00000049255	NA	NA
0.236787	6.23359	1.40377	0.179668	0.999831	-4.47014	ENSRNOG00000014456	Coq10b	coenzyme Q10B [Source:RGD Symbol;Acc:1359509]
0.235927	3.71469	1.87916	0.0787281	0.999831	-4.25692	ENSRNOG00000000818	Ppp1r18	protein phosphatase 1, regulatory subunit 18 [Source:RGD Symbol;Acc:1309543]
0.235472	2.84825	0.88325	0.390295	0.999831	-4.62927	ENSRNOG00000007271	Map3k9	mitogen-activated protein kinase kinase kinase 9 [Source:RGD Symbol;Acc:1562149]
0.235332	3.8767	0.595924	0.559636	0.999831	-4.71868	ENSRNOG00000026745	Acsl6	acyl-CoA synthetase long-chain family member 6 [Source:RGD Symbol;Acc:69403]
0.235239	3.97141	0.986027	0.338926	0.999831	-4.68268	ENSRNOG00000049507	Septin10	septin 10 [Source:RGD Symbol;Acc:1359307]
0.235217	4.16452	2.51286	0.0231791	0.999831	-3.83272	ENSRNOG00000018052	Cnksr3	Cnksr family member 3 [Source:RGD Symbol;Acc:1307544]
0.234958	3.50967	0.776751	0.448738	0.999831	-4.70877	ENSRNOG00000049593	NA	NA
0.234883	3.10204	0.835785	0.415692	0.999831	-4.65025	ENSRNOG00000017918	Iglon5	IgLON family member 5 [Source:RGD Symbol;Acc:1305344]
0.234791	3.62224	0.94533	0.358673	0.999831	-4.64921	ENSRNOG00000021611	Clip2	CAP-GLY domain containing linker protein 2 [Source:RGD Symbol;Acc:62019]
0.23431	2.70852	0.626557	0.539865	0.999831	-4.65951	ENSRNOG00000042886	Rps28	ribosomal protein S28 [Source:RGD Symbol;Acc:621046]
0.234294	3.3495	1.28378	0.217661	0.999831	-4.52803	ENSRNOG00000049410	Chrm3	cholinergic receptor, muscarinic 3 [Source:RGD Symbol;Acc:2343]
0.234183	2.9117	0.84899	0.40852	0.999831	-4.64005	ENSRNOG00000017342	Zdhhc7	zinc finger DHHC-type palmitoyltransferase 7 [Source:RGD Symbol;Acc:620205]
0.233983	3.7875	1.2267	0.237838	0.999831	-4.55312	ENSRNOG00000016245	Neto2	neuropilin and tolloid like 2 [Source:RGD Symbol;Acc:1305310]
0.233953	5.80676	0.699915	0.494121	0.999831	-4.82633	ENSRNOG00000052020	NA	NA
0.233586	2.32997	1.54254	0.14266	0.999831	-4.48448	ENSRNOG00000025502	Arhgef37	Rho guanine nucleotide exchange factor 37 [Source:RGD Symbol;Acc:1560471]
0.233493	2.77229	1.10155	0.287095	0.999831	-4.59181	ENSRNOG00000017962	Serpinb6a	serpin family B member 6A [Source:RGD Symbol;Acc:735108]
0.233343	2.44756	1.14064	0.270955	0.999831	-4.578	ENSRNOG00000023411	Vsig10l	V-set and immunoglobulin domain containing 10 like [Source:RGD Symbol;Acc:1564982]
0.233278	6.01749	2.12184	0.0499628	0.999831	-3.88378	ENSRNOG00000005669	Car8	carbonic anhydrase 8 [Source:RGD Symbol;Acc:1304709]
0.233205	2.51087	1.12821	0.276013	0.999831	-4.58042	ENSRNOG00000052564	Gpx3	glutathione peroxidase 3 [Source:RGD Symbol;Acc:69224]
0.233182	4.35152	1.90786	0.0746842	0.999831	-4.14289	ENSRNOG00000048891	Prr14l	proline rich 14-like [Source:RGD Symbol;Acc:1305469]
0.232642	0.471683	0.16773	0.868916	0.999831	-4.6024	ENSRNOG00000002358	Scpep1	serine carboxypeptidase 1 [Source:RGD Symbol;Acc:620067]
0.232404	2.35162	0.651626	0.523975	0.999831	-4.64353	ENSRNOG00000004814	Elob	elongin B [Source:RGD Symbol;Acc:621200]
0.232317	4.04051	1.45249	0.165865	0.999831	-4.44275	ENSRNOG00000031485	Dpp3	dipeptidylpeptidase 3 [Source:RGD Symbol;Acc:621127]
0.232097	3.16571	1.23579	0.234531	0.999831	-4.54803	ENSRNOG00000000036	Klhdc8a	kelch domain containing 8A [Source:RGD Symbol;Acc:1305132]
0.231484	7.63516	1.53427	0.14467	0.999831	-4.37242	ENSRNOG00000033064	Edil3	EGF like repeats and discoidin domains 3 [Source:RGD Symbol;Acc:1588887]
0.231333	2.542	0.912513	0.375163	0.999831	-4.62071	ENSRNOG00000009473	Osbpl7	oxysterol binding protein-like 7 [Source:RGD Symbol;Acc:1309141]
0.230924	3.62517	0.727782	0.477356	0.999831	-4.69835	ENSRNOG00000011751	Ncdn	neurochondrin [Source:RGD Symbol;Acc:621734]
0.230924	2.50713	0.822665	0.422897	0.999831	-4.63279	ENSRNOG00000006238	Traf2	Tnf receptor-associated factor 2 [Source:RGD Symbol;Acc:1310457]
0.23073	3.55193	0.941342	0.360649	0.999831	-4.63741	ENSRNOG00000004280	Tcn2	transcobalamin 2 [Source:RGD Symbol;Acc:620681]
0.23046	3.0238	0.804194	0.433176	0.999831	-4.6495	ENSRNOG00000020159	Dalrd3	DALR anticodon binding domain containing 3 [Source:RGD Symbol;Acc:1359206]
0.23046	4.8211	0.59194	0.562236	0.999831	-4.79227	ENSRNOG00000018373	Tln2	talin 2 [Source:RGD Symbol;Acc:1565416]
0.230351	4.50155	1.48604	0.156877	0.999831	-4.41569	ENSRNOG00000011334	Tmem63c	transmembrane protein 63c [Source:RGD Symbol;Acc:1310207]
0.230301	2.4669	1.003	0.330921	0.999831	-4.60749	ENSRNOG00000019299	Edem2	ER degradation enhancing alpha-mannosidase like protein 2 [Source:RGD Symbol;Acc:1303074]
0.230235	2.86639	0.499999	0.623942	0.999831	-4.7606	ENSRNOG00000024120	Rxfp1	relaxin family peptide receptor 1 [Source:RGD Symbol;Acc:1302973]
0.229939	2.18724	1.7436	0.100579	0.999831	-4.42764	ENSRNOG00000032339	Rasl12	RAS-like, family 12 [Source:RGD Symbol;Acc:1306268]
0.229788	2.36149	0.791905	0.440102	0.999831	-4.63786	ENSRNOG00000016828	Cmtm5	CKLF-like MARVEL transmembrane domain containing 5 [Source:RGD Symbol;Acc:1307045]
0.229593	0.87647	0.509296	0.617558	0.999831	-4.61441	ENSRNOG00000027213	Asphd1	aspartate beta-hydroxylase domain containing 1 [Source:RGD Symbol;Acc:1306636]
0.229451	5.17218	2.18695	0.0440854	0.999831	-3.87956	ENSRNOG00000009350	Sez6	seizure related 6 homolog [Source:RGD Symbol;Acc:619780]
0.229395	3.14486	1.16267	0.26216	0.999831	-4.57175	ENSRNOG00000003567	Ppox	protoporphyrinogen oxidase [Source:RGD Symbol;Acc:1310543]
0.229363	4.55118	1.76458	0.0968826	0.999831	-4.24005	ENSRNOG00000010592	Slc25a27	solute carrier family 25, member 27 [Source:RGD Symbol;Acc:620787]
0.228214	2.29195	0.589331	0.563941	0.999831	-4.65379	ENSRNOG00000002294	Snx29	sorting nexin 29 [Source:RGD Symbol;Acc:1596162]
0.228027	3.07285	0.765338	0.455311	0.999831	-4.65737	ENSRNOG00000001091	Hip1r	huntingtin interacting protein 1 related [Source:RGD Symbol;Acc:621615]
0.227873	1.99216	0.914436	0.374183	0.999831	-4.6123	ENSRNOG00000015068	Il11ra1	interleukin 11 receptor subunit alpha 1 [Source:RGD Symbol;Acc:621332]
0.227654	0.219635	0.176085	0.862456	0.999831	-4.60621	ENSRNOG00000008658	Mitf	melanocyte inducing transcription factor [Source:RGD Symbol;Acc:3092]
0.227376	2.63864	1.24887	0.229835	0.999831	-4.54529	ENSRNOG00000005854	Angpt1	angiopoietin 1 [Source:RGD Symbol;Acc:628896]
0.227275	2.93847	0.910668	0.376105	0.999831	-4.63542	ENSRNOG00000014742	Ankrd13b	ankyrin repeat domain 13B [Source:RGD Symbol;Acc:1564005]
0.226974	2.41505	0.665287	0.515427	0.999831	-4.6397	ENSRNOG00000029512	LOC100361854	ribosomal protein S26-like [Source:RGD Symbol;Acc:2319323]
0.226951	4.55021	0.831768	0.417889	0.999831	-4.72576	ENSRNOG00000001034	Evi5l	ecotropic viral integration site 5-like [Source:RGD Symbol;Acc:1561962]
0.226942	2.15106	1.72515	0.103931	0.999831	-4.44648	ENSRNOG00000023320	Tspan1	tetraspanin 1 [Source:RGD Symbol;Acc:1303308]
0.226779	3.50708	1.00444	0.330248	0.999831	-4.62834	ENSRNOG00000014152	Kcnip3	potassium voltage-gated channel interacting protein 3 [Source:RGD Symbol;Acc:70888]
0.226465	2.42876	0.627748	0.539104	0.999831	-4.63712	ENSRNOG00000020318	Pnkp	polynucleotide kinase 3'-phosphatase [Source:RGD Symbol;Acc:1303331]
0.226383	3.12358	0.727968	0.477245	0.999831	-4.67855	ENSRNOG00000026447	Disp3	dispatched RND transporter family member 3 [Source:RGD Symbol;Acc:1305820]
0.226228	3.06296	2.31108	0.0346155	0.999831	-4.07374	ENSRNOG00000002188	Hpse	heparanase [Source:RGD Symbol;Acc:61969]
0.226207	8.90889	1.25822	0.226522	0.999831	-4.57466	ENSRNOG00000013516	Sf3b1	splicing factor 3b, subunit 1 [Source:RGD Symbol;Acc:620148]
0.226095	1.86112	0.82093	0.423856	0.999831	-4.61849	ENSRNOG00000014405	Aprt	adenine phosphoribosyl transferase [Source:RGD Symbol;Acc:1307758]
0.22609	2.46045	1.59043	0.131472	0.999831	-4.47558	ENSRNOG00000053675	Dhh	desert hedgehog signaling molecule [Source:RGD Symbol;Acc:620711]
0.225926	3.52753	0.970687	0.346278	0.999831	-4.62987	ENSRNOG00000017704	Sema3f	semaphorin 3F [Source:RGD Symbol;Acc:1308514]
0.225895	5.19489	2.38791	0.0297454	0.999831	-3.69218	ENSRNOG00000017149	Fam131b	family with sequence similarity 131, member B [Source:RGD Symbol;Acc:1560653]
0.2258	3.38936	0.758554	0.459246	0.999831	-4.68606	ENSRNOG00000009735	Fibcd1	fibrinogen C domain containing 1 [Source:RGD Symbol;Acc:1309097]
0.225759	3.86088	0.679753	0.506463	0.999831	-4.71768	ENSRNOG00000019974	NA	NA
0.225361	2.01267	1.35576	0.194169	0.999831	-4.51509	ENSRNOG00000016366	Colec12	collectin sub-family member 12 [Source:RGD Symbol;Acc:735039]
0.225164	4.80029	1.78666	0.0931221	0.999831	-4.21827	ENSRNOG00000001449	Pom121	POM121 transmembrane nucleoporin [Source:RGD Symbol;Acc:620680]
0.224788	1.94813	0.86973	0.397421	0.999831	-4.61772	ENSRNOG00000050318	Fsd1	fibronectin type III and SPRY domain containing 1 [Source:RGD Symbol;Acc:1583850]
0.224779	2.39332	1.34052	0.198966	0.999831	-4.52682	ENSRNOG00000011826	Lzts1	leucine zipper tumor suppressor 1 [Source:RGD Symbol;Acc:708565]
0.2247	2.98712	1.25762	0.226734	0.999831	-4.53915	ENSRNOG00000020881	Frmd8	FERM domain containing 8 [Source:RGD Symbol;Acc:1310323]
0.224546	4.94838	0.751505	0.463357	0.999831	-4.76952	ENSRNOG00000012852	Bin1	bridging integrator 1 [Source:RGD Symbol;Acc:621786]
0.224353	3.08665	1.73756	0.101665	0.999831	-4.35958	ENSRNOG00000020088	Klhl26	kelch-like family member 26 [Source:RGD Symbol;Acc:1312034]
0.224278	8.44409	1.54347	0.142435	0.999831	-4.36496	ENSRNOG00000056836	Cav1	caveolin 1 [Source:RGD Symbol;Acc:2280]
0.223958	0.818338	0.486783	0.633072	0.999831	-4.63319	ENSRNOG00000016763	Fgfr4	fibroblast growth factor receptor 4 [Source:RGD Symbol;Acc:2612]
0.223541	4.01647	1.65556	0.117463	0.999831	-4.32803	ENSRNOG00000010320	Efnb3	ephrin B3 [Source:RGD Symbol;Acc:2541]
0.223369	3.22922	1.35403	0.194708	0.999831	-4.50508	ENSRNOG00000011830	Plekha3	pleckstrin homology domain containing A3 [Source:RGD Symbol;Acc:1305244]
0.223276	3.21592	1.68622	0.111324	0.999831	-4.36614	ENSRNOG00000006800	Pgap4	post-GPI attachment to proteins GalNAc transferase 4 [Source:RGD Symbol;Acc:1307218]
0.223245	2.1052	0.652154	0.523643	0.999831	-4.64556	ENSRNOG00000012367	Pcdh7	protocadherin 7 [Source:RGD Symbol;Acc:1303209]
0.223185	1.84357	0.571208	0.575865	0.999831	-4.63335	ENSRNOG00000002983	Nfix	nuclear factor I X [Source:RGD Symbol;Acc:69080]
0.223177	1.82105	0.611428	0.549582	0.999831	-4.62722	ENSRNOG00000014908	Sf3b5	splicing factor 3b, subunit 5 [Source:RGD Symbol;Acc:1586993]
0.222763	2.20735	0.916528	0.373118	0.999831	-4.61548	ENSRNOG00000021032	Sphk2	sphingosine kinase 2 [Source:RGD Symbol;Acc:1307757]
0.22273	2.67647	0.99122	0.336462	0.999831	-4.60807	ENSRNOG00000014352	Smim12	small integral membrane protein 12 [Source:RGD Symbol;Acc:1591379]
0.222579	2.471	1.15444	0.26542	0.999831	-4.57523	ENSRNOG00000013165	Bet1l	Bet1 golgi vesicular membrane trafficking protein-like [Source:RGD Symbol;Acc:71051]
0.222553	5.50938	1.03399	0.316654	0.999831	-4.67207	ENSRNOG00000009845	Acadm	acyl-CoA dehydrogenase medium chain [Source:RGD Symbol;Acc:2012]
0.222271	1.49121	0.556781	0.58545	0.999831	-4.63004	ENSRNOG00000017851	Etfb	electron transfer flavoprotein subunit beta [Source:RGD Symbol;Acc:1303312]
0.221619	6.07342	1.4265	0.173115	0.999831	-4.45205	ENSRNOG00000013271	Ireb2	iron responsive element binding protein 2 [Source:RGD Symbol;Acc:621539]
0.221199	1.9788	1.13782	0.272097	0.999831	-4.57988	ENSRNOG00000013898	Cdca4	cell division cycle associated 4 [Source:RGD Symbol;Acc:1563593]
0.221042	2.91503	0.798735	0.436244	0.999831	-4.65465	ENSRNOG00000026791	Pgbd5	piggyBac transposable element derived 5 [Source:RGD Symbol;Acc:1310825]
0.221006	3.99793	2.42823	0.0274551	0.999831	-3.84876	ENSRNOG00000009892	Adamts15	ADAM metallopeptidase with thrombospondin type 1 motif, 15 [Source:RGD Symbol;Acc:1309770]
0.220984	5.53186	1.0163	0.32474	0.999831	-4.68831	ENSRNOG00000009470	Flnb	filamin B [Source:RGD Symbol;Acc:1311915]
0.220849	4.68947	2.00392	0.062468	0.999831	-4.07194	ENSRNOG00000005515	Rhbdl3	rhomboid like 3 [Source:RGD Symbol;Acc:1311901]
0.22079	1.66142	0.895876	0.383717	0.999831	-4.60904	ENSRNOG00000011488	Sergef	secretion regulating guanine nucleotide exchange factor [Source:RGD Symbol;Acc:1563497]
0.220657	2.2527	1.81897	0.0878501	0.999831	-4.40611	ENSRNOG00000007575	Plppr1	phospholipid phosphatase related 1 [Source:RGD Symbol;Acc:1303116]
0.220649	3.39077	0.933631	0.364493	0.999831	-4.63787	ENSRNOG00000014235	Zgpat	zinc finger CCCH-type and G-patch domain containing [Source:RGD Symbol;Acc:1310801]
0.220567	5.37168	1.44427	0.16813	0.999831	-4.43694	ENSRNOG00000004978	Prkacb	protein kinase cAMP-activated catalytic subunit beta [Source:RGD Symbol;Acc:1310574]
0.220484	4.55158	1.45087	0.16631	0.999831	-4.43565	ENSRNOG00000018237	Gstp1	glutathione S-transferase pi 1 [Source:RGD Symbol;Acc:2758]
0.220461	5.54848	2.47546	0.0249846	0.999831	-3.59001	ENSRNOG00000003031	Atp2b4	ATPase plasma membrane Ca2+ transporting 4 [Source:RGD Symbol;Acc:621305]
0.220093	4.45914	1.23398	0.235186	0.999831	-4.55884	ENSRNOG00000009889	Pgm1	phosphoglucomutase 1 [Source:RGD Symbol;Acc:3316]
0.219981	4.54013	0.644654	0.528367	0.999831	-4.82181	ENSRNOG00000028585	Tceal8	transcription elongation factor A like 8 [Source:RGD Symbol;Acc:1359631]
0.219587	0.0129776	0.182577	0.857443	0.999831	-4.60873	ENSRNOG00000017641	Rnf44	ring finger protein 44 [Source:RGD Symbol;Acc:1307212]
0.219275	2.71713	1.15919	0.263536	0.999831	-4.57327	ENSRNOG00000004078	Eno3	enolase 3 [Source:RGD Symbol;Acc:2555]
0.21926	3.29447	1.18191	0.254662	0.999831	-4.56617	ENSRNOG00000025909	Uqcc2	ubiquinol-cytochrome c reductase complex assembly factor 2 [Source:RGD Symbol;Acc:1306917]
0.219088	2.24583	0.522974	0.608223	0.999831	-4.64369	ENSRNOG00000009184	Foxp1	forkhead box P1 [Source:RGD Symbol;Acc:1308669]
0.219079	2.19224	0.716359	0.484187	0.999831	-4.65343	ENSRNOG00000020117	Brms1	BRMS1, transcriptional repressor and anoikis regulator [Source:RGD Symbol;Acc:1311057]
0.21897	1.63586	1.03702	0.315282	0.999831	-4.59405	ENSRNOG00000054495	Cldn2	claudin 2 [Source:RGD Symbol;Acc:1560247]
0.218827	2.15787	0.713415	0.485956	0.999831	-4.62818	ENSRNOG00000001430	Polr2j	RNA polymerase II subunit J [Source:RGD Symbol;Acc:1310198]
0.218632	4.15485	1.52774	0.146275	0.999831	-4.39941	ENSRNOG00000000463	Col11a2	collagen type XI alpha 2 chain [Source:RGD Symbol;Acc:2373]
0.218531	2.44257	0.643003	0.529411	0.999831	-4.65172	ENSRNOG00000028674	Fbxw5	F-box and WD repeat domain containing 5 [Source:RGD Symbol;Acc:1305661]
0.218149	1.73431	0.489584	0.631131	0.999831	-4.63169	ENSRNOG00000028512	Ilvbl	ilvB acetolactate synthase like [Source:RGD Symbol;Acc:1307988]
0.218098	5.47768	1.56469	0.13739	0.999831	-4.35368	ENSRNOG00000010087	Zfp143	zinc finger protein 143 [Source:RGD Symbol;Acc:1305662]
0.217629	4.24038	1.00533	0.32983	0.999831	-4.65765	ENSRNOG00000008673	Arpc3	actin related protein 2/3 complex, subunit 3 [Source:RGD Symbol;Acc:1311985]
0.217527	2.28495	0.869738	0.397417	0.999831	-4.62173	ENSRNOG00000015844	Snrpd2	small nuclear ribonucleoprotein D2 polypeptide [Source:RGD Symbol;Acc:1593018]
0.217517	1.99117	0.907897	0.377523	0.999831	-4.6137	ENSRNOG00000003497	Thoc6	THO complex subunit 6 [Source:RGD Symbol;Acc:708553]
0.217118	2.17423	0.943718	0.359471	0.999831	-4.61262	ENSRNOG00000027697	Nmnat2	nicotinamide nucleotide adenylyltransferase 2 [Source:RGD Symbol;Acc:1307331]
0.217092	3.38004	1.14303	0.269989	0.999831	-4.57726	ENSRNOG00000027480	Tmem116	transmembrane protein 116 [Source:RGD Symbol;Acc:1596066]
0.216976	1.95989	1.08132	0.295727	0.999831	-4.58942	ENSRNOG00000019434	Adat1	adenosine deaminase, tRNA-specific 1 [Source:RGD Symbol;Acc:1591020]
0.216228	2.51512	0.926838	0.367903	0.999831	-4.62292	ENSRNOG00000052296	Shank3	SH3 and multiple ankyrin repeat domains 3 [Source:RGD Symbol;Acc:69264]
0.216137	4.62716	1.29238	0.214741	0.999831	-4.52444	ENSRNOG00000013878	Hmgxb4	HMG-box containing 4 [Source:RGD Symbol;Acc:1305783]
0.216076	2.30264	1.37403	0.188544	0.999831	-4.52639	ENSRNOG00000004900	Crhr1	corticotropin releasing hormone receptor 1 [Source:RGD Symbol;Acc:61276]
0.215496	3.5185	1.28204	0.218256	0.999831	-4.5321	ENSRNOG00000009902	Lrrc46	leucine rich repeat containing 46 [Source:RGD Symbol;Acc:1303311]
0.21542	2.34954	0.964256	0.349392	0.999831	-4.6152	ENSRNOG00000007905	Itga7	integrin subunit alpha 7 [Source:RGD Symbol;Acc:71022]
0.215362	2.75159	0.851075	0.407396	0.999831	-4.63175	ENSRNOG00000018057	Mrpl2	mitochondrial ribosomal protein L2 [Source:RGD Symbol;Acc:1307147]
0.214852	3.58759	1.21189	0.243303	0.999831	-4.55778	ENSRNOG00000020684	Vat1	vesicle amine transport 1 [Source:RGD Symbol;Acc:1308943]
0.21483	4.36193	1.11712	0.280584	0.999831	-4.60877	ENSRNOG00000021960	Morf4l1-ps4	mortality factor 4 like 1, pseudogene 4 [Source:RGD Symbol;Acc:6496245]
0.214675	5.30724	2.36764	0.0309636	0.999831	-3.69185	ENSRNOG00000045728	Crybg3	crystallin beta-gamma domain containing 3 [Source:RGD Symbol;Acc:1305628]
0.214368	2.21349	0.677348	0.507947	0.999831	-4.64093	ENSRNOG00000020431	Matk	megakaryocyte-associated tyrosine kinase [Source:RGD Symbol;Acc:69058]
0.214366	5.06949	0.896637	0.383322	0.999831	-4.7365	ENSRNOG00000006824	Hdac11	histone deacetylase 11 [Source:RGD Symbol;Acc:1311706]
0.214074	1.95037	0.765092	0.455453	0.999831	-4.62058	ENSRNOG00000014098	Pold2	DNA polymerase delta 2, accessory subunit [Source:RGD Symbol;Acc:1304954]
0.213999	4.52062	1.46808	0.161637	0.999831	-4.42583	ENSRNOG00000014530	Nav2	neuron navigator 2 [Source:RGD Symbol;Acc:619778]
0.213977	7.44467	3.18755	0.00577738	0.999831	-2.82473	ENSRNOG00000017206	Igfbp5	insulin-like growth factor binding protein 5 [Source:RGD Symbol;Acc:2876]
0.213673	1.98168	0.936428	0.363096	0.999831	-4.61674	ENSRNOG00000053339	NA	NA
0.213531	4.1279	1.9598	0.0678362	0.999831	-4.13522	ENSRNOG00000023874	Tmem62	transmembrane protein 62 [Source:RGD Symbol;Acc:1305647]
0.213382	4.04487	1.26664	0.223572	0.999831	-4.53596	ENSRNOG00000018399	Cpne6	copine 6 [Source:RGD Symbol;Acc:1583895]
0.213328	4.06152	1.2901	0.215512	0.999831	-4.52486	ENSRNOG00000031287	Cacna2d3	calcium voltage-gated channel auxiliary subunit alpha2delta 3 [Source:RGD Symbol;Acc:631361]
0.213179	6.00342	1.87304	0.0796157	0.999831	-4.09823	ENSRNOG00000021052	Patl1	PAT1 homolog 1, processing body mRNA decay factor [Source:RGD Symbol;Acc:1305514]
0.213171	3.88521	1.1236	0.277907	0.999831	-4.59447	ENSRNOG00000054400	Sh3bp5l	SH3 binding domain protein 5 like [Source:RGD Symbol;Acc:1590939]
0.212714	3.29367	1.29973	0.21227	0.999831	-4.52293	ENSRNOG00000016622	Ankra2	ankyrin repeat family A member 2 [Source:RGD Symbol;Acc:1303108]
0.21251	2.3913	1.35052	0.19581	0.999831	-4.53849	ENSRNOG00000031494	Armh1	armadillo-like helical domain containing 1 [Source:RGD Symbol;Acc:1563714]
0.212504	5.17612	1.7526	0.0989783	0.999831	-4.21829	ENSRNOG00000001141	Srrm4	serine/arginine repetitive matrix 4 [Source:RGD Symbol;Acc:1560213]
0.212409	4.33084	0.682714	0.504639	0.999831	-4.77749	ENSRNOG00000000043	Idua	alpha-L-iduronidase [Source:RGD Symbol;Acc:1310943]
0.211854	2.96121	1.42566	0.173353	0.999831	-4.48586	ENSRNOG00000005246	Tfap2c	transcription factor AP-2 gamma [Source:RGD Symbol;Acc:1303185]
0.211796	2.48135	0.785601	0.443681	0.999831	-4.63891	ENSRNOG00000015967	Sh3bgrl3	SH3 domain binding glutamate-rich protein like 3 [Source:RGD Symbol;Acc:1308118]
0.211689	2.98338	0.563498	0.580977	0.999831	-4.68073	ENSRNOG00000019555	Arap1	ArfGAP with RhoGAP domain, ankyrin repeat and PH domain 1 [Source:RGD Symbol;Acc:1310385]
0.211652	4.09524	0.926275	0.368186	0.999831	-4.66958	ENSRNOG00000016751	Slc25a28	solute carrier family 25 member 28 [Source:RGD Symbol;Acc:1584155]
0.211619	4.22604	0.924301	0.369181	0.999831	-4.68465	ENSRNOG00000015430	Nlgn2	neuroligin 2 [Source:RGD Symbol;Acc:621118]
0.211566	1.45773	0.911105	0.375882	0.999831	-4.61076	ENSRNOG00000052795	Itpr3	inositol 1,4,5-trisphosphate receptor, type 3 [Source:RGD Symbol;Acc:2934]
0.211514	3.15436	1.55495	0.139686	0.999831	-4.42089	ENSRNOG00000011402	Isg20l2	interferon stimulated exonuclease gene 20-like 2 [Source:RGD Symbol;Acc:1359413]
0.211355	3.33534	1.07997	0.296305	0.999831	-4.59873	ENSRNOG00000049912	Atp5f1e	ATP synthase F1 subunit epsilon [Source:RGD Symbol;Acc:621374]
0.210998	2.95872	1.59341	0.130801	0.999831	-4.40564	ENSRNOG00000004873	Prkch	protein kinase C, eta [Source:RGD Symbol;Acc:621888]
0.210776	3.6627	0.964616	0.349218	0.999831	-4.64016	ENSRNOG00000016778	Cops7a	COP9 signalosome subunit 7A [Source:RGD Symbol;Acc:1310070]
0.210695	3.20177	0.720422	0.48175	0.999831	-4.70908	ENSRNOG00000016688	Ston1	stonin 1 [Source:RGD Symbol;Acc:727878]
0.210547	5.55556	1.24215	0.232239	0.999831	-4.5684	ENSRNOG00000003198	Bmerb1	bMERB domain containing 1 [Source:RGD Symbol;Acc:1305733]
0.210424	5.262	1.02514	0.320679	0.999831	-4.67609	ENSRNOG00000005358	Pmm1	phosphomannomutase 1 [Source:RGD Symbol;Acc:1310897]
0.210288	2.27503	1.584	0.132931	0.999831	-4.46551	ENSRNOG00000030101	Traip	TRAF-interacting protein [Source:RGD Symbol;Acc:1309761]
0.210136	2.32941	0.594843	0.560341	0.999831	-4.64648	ENSRNOG00000003280	Grin2c	glutamate ionotropic receptor NMDA type subunit 2C [Source:RGD Symbol;Acc:2739]
0.209821	3.541	0.781505	0.446017	0.999831	-4.68232	ENSRNOG00000014369	Slc27a4	solute carrier family 27 member 4 [Source:RGD Symbol;Acc:1307383]
0.209462	3.01575	0.886455	0.388618	0.999831	-4.64072	ENSRNOG00000006695	Rbck1	RANBP2-type and C3HC4-type zinc finger containing 1 [Source:RGD Symbol;Acc:708404]
0.209434	2.64531	0.776164	0.449074	0.999831	-4.64395	ENSRNOG00000054033	Adap1	ArfGAP with dual PH domains 1 [Source:RGD Symbol;Acc:621418]
0.209214	3.24264	0.6665	0.514672	0.999831	-4.69548	ENSRNOG00000022248	Fbxl16	F-box and leucine-rich repeat protein 16 [Source:RGD Symbol;Acc:1309127]
0.209126	3.56106	0.923996	0.369335	0.999831	-4.65511	ENSRNOG00000016372	Slc12a7	solute carrier family 12 member 7 [Source:RGD Symbol;Acc:1359672]
0.208893	2.01619	1.073	0.299327	0.999831	-4.59035	ENSRNOG00000003745	Atf3	activating transcription factor 3 [Source:RGD Symbol;Acc:2165]
0.208875	1.62079	0.727489	0.477531	0.999831	-4.62501	ENSRNOG00000014969	Lzts2	leucine zipper tumor suppressor 2 [Source:RGD Symbol;Acc:1359249]
0.208248	3.2453	1.23193	0.23593	0.999831	-4.54895	ENSRNOG00000008048	Plscr1	phospholipid scramblase 1 [Source:RGD Symbol;Acc:620521]
0.20809	4.14276	0.999352	0.33263	0.999831	-4.64106	ENSRNOG00000015229	Zc3h4	zinc finger CCCH-type containing 4 [Source:RGD Symbol;Acc:1596943]
0.208082	2.15927	0.765288	0.45534	0.999831	-4.62759	ENSRNOG00000016631	Zfp276	zinc finger protein (C2H2 type) 276 [Source:RGD Symbol;Acc:1307469]
0.208063	5.94833	2.19376	0.0435089	0.999831	-3.82017	ENSRNOG00000006087	Rnf20	ring finger protein 20 [Source:RGD Symbol;Acc:1311936]
0.207955	3.84157	1.10239	0.286741	0.999831	-4.6019	ENSRNOG00000022171	Dhx37	DEAH-box helicase 37 [Source:RGD Symbol;Acc:1306837]
0.207729	2.90136	0.897005	0.383132	0.999831	-4.64069	ENSRNOG00000050848	Dtx1	deltex E3 ubiquitin ligase 1 [Source:RGD Symbol;Acc:1585380]
0.207554	1.84524	1.14386	0.269655	0.999831	-4.57931	ENSRNOG00000010291	Slc46a1	solute carrier family 46 member 1 [Source:RGD Symbol;Acc:1309472]
0.207417	3.62443	2.9689	0.00911541	0.999831	-3.55355	ENSRNOG00000028207	Colgalt2	collagen beta(1-O)galactosyltransferase 2 [Source:RGD Symbol;Acc:1304702]
0.207335	3.44322	0.164549	0.871378	0.999831	-4.63047	ENSRNOG00000010495	Ttc17	tetratricopeptide repeat domain 17 [Source:RGD Symbol;Acc:1305410]
0.207321	5.56188	1.79989	0.0909301	0.999831	-4.18275	ENSRNOG00000052990	Cers5	ceramide synthase 5 [Source:RGD Symbol;Acc:1311597]
0.207218	1.92713	0.738647	0.470913	0.999831	-4.63232	ENSRNOG00000025689	Abhd1	abhydrolase domain containing 1 [Source:RGD Symbol;Acc:1310988]
0.207162	3.97921	2.55669	0.0212209	0.999831	-3.81348	ENSRNOG00000039024	Spice1	spindle and centriole associated protein 1 [Source:RGD Symbol;Acc:1310729]
0.206845	2.47402	1.91056	0.074313	0.999831	-4.33988	ENSRNOG00000016381	Ust	uronyl-2-sulfotransferase [Source:RGD Symbol;Acc:1304743]
0.206814	2.93904	0.912653	0.375092	0.999831	-4.64236	ENSRNOG00000008447	Tmem132d	transmembrane protein 132D [Source:RGD Symbol;Acc:735062]
0.206696	4.22269	1.31539	0.207082	0.999831	-4.51188	ENSRNOG00000058457	Chtopl1	chromatin target of PRMT1-like 1 [Source:RGD Symbol;Acc:1584868]
0.206647	2.80781	1.14673	0.268502	0.999831	-4.57802	ENSRNOG00000016417	Zfp136	zinc finger protein 136 [Source:RGD Symbol;Acc:1565635]
0.206559	4.1247	1.16108	0.26279	0.999831	-4.5832	ENSRNOG00000052730	Psmb3	proteasome 20S subunit beta 3 [Source:RGD Symbol;Acc:61875]
0.20648	1.21594	0.454745	0.655456	0.999831	-4.61875	ENSRNOG00000004595	Pou6f1	POU class 6 homeobox 1 [Source:RGD Symbol;Acc:620615]
0.206387	2.71752	0.700743	0.493618	0.999831	-4.655	ENSRNOG00000053729	Tesk1	testis associated actin remodelling kinase 1 [Source:RGD Symbol;Acc:62059]
0.206289	6.53329	0.926226	0.368211	0.999831	-4.77128	ENSRNOG00000013451	Drosha	drosha ribonuclease III [Source:RGD Symbol;Acc:1307626]
0.206256	3.77403	0.748392	0.465179	0.999831	-4.71561	ENSRNOG00000020047	Tut1	terminal uridylyl transferase 1, U6 snRNA-specific [Source:RGD Symbol;Acc:1561043]
0.206229	5.51938	1.2307	0.236378	0.999831	-4.58	ENSRNOG00000030520	Sarnp	SAP domain containing ribonucleoprotein [Source:RGD Symbol;Acc:1305692]
0.205939	3.75556	0.822051	0.423236	0.999831	-4.68428	ENSRNOG00000016930	Ube2s	ubiquitin-conjugating enzyme E2S [Source:RGD Symbol;Acc:1564746]
0.205902	2.61236	0.718406	0.482958	0.999831	-4.65125	ENSRNOG00000006551	Dcaf15	DDB1 and CUL4 associated factor 15 [Source:RGD Symbol;Acc:1304881]
0.205774	1.48402	0.759659	0.458603	0.999831	-4.61411	ENSRNOG00000046922	Phactr4	phosphatase and actin regulator 4 [Source:RGD Symbol;Acc:1592823]
0.205766	2.65805	0.704187	0.491529	0.999831	-4.64934	ENSRNOG00000003983	NA	NA
0.205656	6.4636	0.893515	0.384941	0.999831	-4.78934	ENSRNOG00000003065	Glyr1	glyoxylate reductase 1 homolog [Source:RGD Symbol;Acc:1309459]
0.205595	2.46239	0.516664	0.612521	0.999831	-4.64848	ENSRNOG00000028356	Chchd10	coiled-coil-helix-coiled-coil-helix domain containing 10 [Source:RGD Symbol;Acc:1359417]
0.205594	1.7297	0.537254	0.598551	0.999831	-4.63109	ENSRNOG00000020616	NA	NA
0.205443	5.13781	0.700748	0.493615	0.999831	-4.80461	ENSRNOG00000017431	RGD1304884	similar to RIKEN cDNA 6430548M08 [Source:RGD Symbol;Acc:1304884]
0.205395	3.11249	1.01874	0.323618	0.999831	-4.62002	ENSRNOG00000009112	Pon2	paraoxonase 2 [Source:RGD Symbol;Acc:1309954]
0.205274	6.59911	1.26981	0.222471	0.999831	-4.56314	ENSRNOG00000016218	Gtf3c1	general transcription factor IIIC subunit 1 [Source:RGD Symbol;Acc:621048]
0.205109	5.08383	2.16526	0.0459685	0.999831	-3.90543	ENSRNOG00000047876	C14h1orf146	similar to human chromosome 1 open reading frame 146 [Source:RGD Symbol;Acc:1586315]
0.204782	3.81553	1.66091	0.11637	0.999831	-4.34109	ENSRNOG00000005990	Wdsub1	WD repeat, sterile alpha motif and U-box domain containing 1 [Source:RGD Symbol;Acc:1359296]
0.204659	6.77355	1.05342	0.307934	0.999831	-4.70041	ENSRNOG00000017163	Pfkp	phosphofructokinase, platelet [Source:RGD Symbol;Acc:61893]
0.204422	3.71857	1.71401	0.106001	0.999831	-4.28562	ENSRNOG00000040266	Cdkl4	cyclin-dependent kinase-like 4 [Source:RGD Symbol;Acc:1583704]
0.20429	3.83035	1.64456	0.119735	0.999831	-4.34136	ENSRNOG00000007899	Mterf1	mitochondrial transcription termination factor 1 [Source:RGD Symbol;Acc:621318]
0.204096	2.74347	0.975001	0.344199	0.999831	-4.62303	ENSRNOG00000007136	Anxa7	annexin A7 [Source:RGD Symbol;Acc:621173]
0.203913	2.09356	0.593182	0.561425	0.999831	-4.65993	ENSRNOG00000037951	Nhsl2	NHS-like 2 [Source:RGD Symbol;Acc:1564117]
0.203769	1.11801	0.698608	0.494916	0.999831	-4.61391	ENSRNOG00000018765	Pold4	DNA polymerase delta 4, accessory subunit [Source:RGD Symbol;Acc:1308519]
0.203759	1.7676	0.416597	0.682558	0.999831	-4.62888	ENSRNOG00000019596	Smg9	SMG9 nonsense mediated mRNA decay factor [Source:RGD Symbol;Acc:1309888]
0.203718	2.59894	0.882719	0.390573	0.999831	-4.62736	ENSRNOG00000000420	Nelfe	negative elongation factor complex member E [Source:RGD Symbol;Acc:1303325]
0.203351	0.242926	0.265191	0.794279	0.999831	-4.61126	ENSRNOG00000000699	Selplg	selectin P ligand [Source:RGD Symbol;Acc:1307971]
0.203117	3.56308	1.40537	0.1792	0.999831	-4.47762	ENSRNOG00000020194	Hes6	hes family bHLH transcription factor 6 [Source:RGD Symbol;Acc:1312047]
0.202947	3.66403	1.61257	0.126558	0.999831	-4.38512	ENSRNOG00000048291	Tbcc	tubulin folding cofactor C [Source:RGD Symbol;Acc:1306756]
0.202928	1.94622	0.922042	0.370323	0.999831	-4.60962	ENSRNOG00000026974	Dbndd1	dysbindin domain containing 1 [Source:RGD Symbol;Acc:1310008]
0.202888	2.05319	0.675815	0.508894	0.999831	-4.63472	ENSRNOG00000022368	Ddx49	DEAD-box helicase 49 [Source:RGD Symbol;Acc:1311124]
0.20257	4.72512	0.773899	0.450375	0.999831	-4.75522	ENSRNOG00000020703	Sipa1l3	signal-induced proliferation-associated 1 like 3 [Source:RGD Symbol;Acc:1311432]
0.202297	4.27911	0.833286	0.417058	0.999831	-4.70619	ENSRNOG00000049785	Ranbp3	RAN binding protein 3 [Source:RGD Symbol;Acc:1589604]
0.201981	4.40465	0.649316	0.525428	0.999831	-4.77671	ENSRNOG00000014634	Gtpbp1	GTP binding protein 1 [Source:RGD Symbol;Acc:1306758]
0.201963	2.99595	0.982153	0.340772	0.999831	-4.61295	ENSRNOG00000020640	Zbtb7b	zinc finger and BTB domain containing 7B [Source:RGD Symbol;Acc:1305963]
0.201952	3.12582	0.987896	0.338038	0.999831	-4.62715	ENSRNOG00000013766	Acaa2	acetyl-CoA acyltransferase 2 [Source:RGD Symbol;Acc:620482]
0.201892	2.15516	0.731637	0.475064	0.999831	-4.63366	ENSRNOG00000011865	Ciao2b	cytosolic iron-sulfur assembly component 2B [Source:RGD Symbol;Acc:1585802]
0.201751	2.41528	0.602661	0.555255	0.999831	-4.64013	ENSRNOG00000015206	Alad	aminolevulinate dehydratase [Source:RGD Symbol;Acc:2083]
0.201717	2.41902	0.709016	0.488608	0.999831	-4.65729	ENSRNOG00000008190	Pnpla7	patatin-like phospholipase domain containing 7 [Source:RGD Symbol;Acc:708466]
0.201639	2.22062	0.886248	0.388726	0.999831	-4.61898	ENSRNOG00000050404	Pmepa1	prostate transmembrane protein, androgen induced 1 [Source:RGD Symbol;Acc:1308255]
0.201562	2.2105	1.34649	0.197077	0.999831	-4.53375	ENSRNOG00000019822	Gadd45b	growth arrest and DNA-damage-inducible, beta [Source:RGD Symbol;Acc:1309080]
0.201391	5.5339	0.88331	0.390263	0.999831	-4.76372	ENSRNOG00000020791	Ube2q1	ubiquitin conjugating enzyme E2 Q1 [Source:RGD Symbol;Acc:1305305]
0.201297	2.8413	0.970464	0.346385	0.999831	-4.62079	ENSRNOG00000010653	Mideas	mitotic deacetylase associated SANT domain protein [Source:RGD Symbol;Acc:1306119]
0.201274	2.48966	1.01171	0.326865	0.999831	-4.60353	ENSRNOG00000001044	Aimp2	aminoacyl tRNA synthetase complex-interacting multifunctional protein 2 [Source:RGD Symbol;Acc:1560787]
0.201194	3.69742	0.712967	0.486226	0.999831	-4.71771	ENSRNOG00000008897	Gga1	golgi associated, gamma adaptin ear containing, ARF binding protein 1 [Source:RGD Symbol;Acc:1307770]
0.201038	3.68529	0.968275	0.347444	0.999831	-4.63812	ENSRNOG00000000435	Ppt2	palmitoyl-protein thioesterase 2 [Source:RGD Symbol;Acc:620375]
0.201036	5.55421	0.75558	0.460977	0.999831	-4.81973	ENSRNOG00000002100	LOC108348180	signal recognition particle subunit SRP72-like [Source:RGD Symbol;Acc:11405956]
0.200569	2.62826	0.688214	0.501262	0.999831	-4.69587	ENSRNOG00000026748	Dennd2a	DENN domain containing 2A [Source:RGD Symbol;Acc:1306142]
0.200517	2.90991	0.879525	0.39225	0.999831	-4.63732	ENSRNOG00000013343	Myg1	MYG1 exonuclease [Source:RGD Symbol;Acc:1359237]
0.200351	3.65121	0.775607	0.449394	0.999831	-4.67493	ENSRNOG00000023473	Rnf122	ring finger protein 122 [Source:RGD Symbol;Acc:1561238]
0.200205	2.44516	1.24503	0.231204	0.999831	-4.55227	ENSRNOG00000032261	Cyp2d4	cytochrome P450, family 2, subfamily d, polypeptide 4 [Source:RGD Symbol;Acc:620640]
0.200055	5.71302	1.26388	0.224536	0.999831	-4.55711	ENSRNOG00000019708	Ctsf	cathepsin F [Source:RGD Symbol;Acc:1308181]
0.199963	5.03157	1.15895	0.26363	0.999831	-4.60635	ENSRNOG00000007645	Kcnj9	potassium inwardly-rectifying channel, subfamily J, member 9 [Source:RGD Symbol;Acc:621440]
0.199882	3.69978	1.49139	0.155482	0.999831	-4.42817	ENSRNOG00000018830	Aff3	ALF transcription elongation factor 3 [Source:RGD Symbol;Acc:1308527]
0.199823	5.92628	1.47909	0.158707	0.999831	-4.41341	ENSRNOG00000061337	Mindy2	MINDY lysine 48 deubiquitinase 2 [Source:RGD Symbol;Acc:1311456]
0.19979	4.85056	1.05926	0.305348	0.999831	-4.64598	ENSRNOG00000000693	Svop	SV2 related protein [Source:RGD Symbol;Acc:620277]
0.199679	3.27516	1.01926	0.323378	0.999831	-4.62384	ENSRNOG00000007012	Ly75	lymphocyte antigen 75 [Source:RGD Symbol;Acc:1565962]
0.199638	3.76422	2.54509	0.0217235	0.999831	-3.82733	ENSRNOG00000059443	NA	NA
0.199468	1.2675	0.582993	0.568097	0.999831	-4.62762	ENSRNOG00000053502	Arhgef17	Rho guanine nucleotide exchange factor 17 [Source:RGD Symbol;Acc:1309890]
0.199447	2.78527	0.94817	0.357269	0.999831	-4.63313	ENSRNOG00000058321	NA	NA
0.199398	2.35804	1.06174	0.304257	0.999831	-4.59261	ENSRNOG00000001891	Gnb1l	G protein subunit beta 1 like [Source:RGD Symbol;Acc:1594165]
0.199303	4.75993	0.74368	0.467946	0.999831	-4.76817	ENSRNOG00000000527	Mtch1	mitochondrial carrier 1 [Source:RGD Symbol;Acc:1309262]
0.199141	2.98495	1.00306	0.330892	0.999831	-4.62193	ENSRNOG00000048431	Nynrin	NYN domain and retroviral integrase containing [Source:RGD Symbol;Acc:6486974]
0.199021	1.78599	0.762439	0.456989	0.999831	-4.62984	ENSRNOG00000029810	Tspan4	tetraspanin 4 [Source:RGD Symbol;Acc:1305810]
0.198991	3.43552	0.69732	0.495699	0.999831	-4.74161	ENSRNOG00000060329	Emb	embigin [Source:RGD Symbol;Acc:621067]
0.198959	2.86592	1.47325	0.160256	0.999831	-4.46456	ENSRNOG00000008258	Fnbp1	formin binding protein 1 [Source:RGD Symbol;Acc:621350]
0.198894	2.9688	1.114	0.281878	0.999831	-4.58409	ENSRNOG00000022983	H2ac25	H2A clustered histone 25 [Source:RGD Symbol;Acc:621437]
0.198881	1.58141	0.707783	0.489353	0.999831	-4.62703	ENSRNOG00000011044	Clmn	calmin [Source:RGD Symbol;Acc:1306741]
0.198745	3.96313	1.38697	0.184638	0.999831	-4.47649	ENSRNOG00000016371	Slc18b1	solute carrier family 18 member B1 [Source:RGD Symbol;Acc:1306962]
0.198502	5.16795	1.26574	0.223887	0.999831	-4.54204	ENSRNOG00000017489	Gse1	Gse1 coiled-coil protein [Source:RGD Symbol;Acc:1562686]
0.198352	4.73842	1.03375	0.316763	0.999831	-4.68456	ENSRNOG00000030118	Msn	moesin [Source:RGD Symbol;Acc:621260]
0.198329	4.42945	0.808685	0.430662	0.999831	-4.7321	ENSRNOG00000049056	AABR07051450.1	adenylate kinase 1 [Source:RGD Symbol;Acc:2076]
0.19826	4.8999	2.39526	0.0293146	0.999831	-3.72696	ENSRNOG00000056697	Kcnab1	potassium voltage-gated channel subfamily A regulatory beta subunit 1 [Source:RGD Symbol;Acc:61827]
0.198246	3.04334	1.81829	0.0879574	0.999831	-4.32055	ENSRNOG00000003134	Slc4a4	solute carrier family 4 member 4 [Source:RGD Symbol;Acc:68936]
0.198181	3.60381	0.620078	0.544015	0.999831	-4.7273	ENSRNOG00000021338	Tmem132a	transmembrane protein 132A [Source:RGD Symbol;Acc:727936]
0.198109	2.3693	0.930658	0.365982	0.999831	-4.62245	ENSRNOG00000017448	Exoc3l2	exocyst complex component 3-like 2 [Source:RGD Symbol;Acc:1592539]
0.19804	4.68009	2.9931	0.00866845	0.999831	-3.33755	ENSRNOG00000030416	Zfp870	zinc finger protein 870 [Source:RGD Symbol;Acc:1597136]
0.197966	3.77173	0.995994	0.334209	0.999831	-4.64203	ENSRNOG00000009195	Tnks1bp1	tankyrase 1 binding protein 1 [Source:RGD Symbol;Acc:1312021]
0.197859	4.8126	0.741416	0.469279	0.999831	-4.76646	ENSRNOG00000018450	NA	NA
0.197696	5.01424	0.971493	0.345889	0.999831	-4.70469	ENSRNOG00000009071	Gripap1	GRIP1 associated protein 1 [Source:RGD Symbol;Acc:621249]
0.197675	3.20972	1.26801	0.223097	0.999831	-4.53827	ENSRNOG00000006513	Borcs6	BLOC-1 related complex subunit 6 [Source:RGD Symbol;Acc:1563885]
0.197636	1.66963	1.02391	0.321245	0.999831	-4.5978	ENSRNOG00000017188	Cyp27a1	cytochrome P450, family 27, subfamily a, polypeptide 1 [Source:RGD Symbol;Acc:727915]
0.1976	2.48849	1.63342	0.122075	0.999831	-4.4485	ENSRNOG00000018334	Ctu1	cytosolic thiouridylase subunit 1 [Source:RGD Symbol;Acc:1308740]
0.197539	2.36241	0.916296	0.373236	0.999831	-4.62369	ENSRNOG00000008489	Ppih	peptidylprolyl isomerase H [Source:RGD Symbol;Acc:1564921]
0.197496	3.72141	0.962968	0.350019	0.999831	-4.65515	ENSRNOG00000007869	Wscd1	WSC domain containing 1 [Source:RGD Symbol;Acc:1308212]
0.197285	4.00217	0.914992	0.3739	0.999831	-4.67814	ENSRNOG00000053203	Mical3	microtubule associated monooxygenase, calponin and LIM domain containing 3 [Source:RGD Symbol;Acc:1359504]
0.197221	3.24427	1.23121	0.236193	0.999831	-4.54906	ENSRNOG00000037406	Cfap141	cilia and flagella associated protein 141 [Source:RGD Symbol;Acc:1564171]
0.197176	4.91877	0.718601	0.482841	0.999831	-4.8	ENSRNOG00000005371	Klhl29	kelch-like family member 29 [Source:RGD Symbol;Acc:1311076]
0.196741	2.31069	0.792688	0.439658	0.999831	-4.64025	ENSRNOG00000020097	Inha	inhibin subunit alpha [Source:RGD Symbol;Acc:2912]
0.196644	4.72903	0.808403	0.43082	0.999831	-4.74962	ENSRNOG00000016143	Gpr162	G protein-coupled receptor 162 [Source:RGD Symbol;Acc:1307437]
0.196532	2.95967	0.90905	0.376933	0.999831	-4.63977	ENSRNOG00000028247	Ankrd13d	ankyrin repeat domain 13D [Source:RGD Symbol;Acc:1309156]
0.19652	1.85279	0.686618	0.502241	0.999831	-4.62948	ENSRNOG00000009783	Camk2g	calcium/calmodulin-dependent protein kinase II gamma [Source:RGD Symbol;Acc:621802]
0.196478	3.98018	0.621752	0.542941	0.999831	-4.74525	ENSRNOG00000019228	Pik3r2	phosphoinositide-3-kinase regulatory subunit 2 [Source:RGD Symbol;Acc:68341]
0.196387	3.78745	0.924769	0.368945	0.999831	-4.6558	ENSRNOG00000018211	Urod	uroporphyrinogen decarboxylase [Source:RGD Symbol;Acc:3946]
0.19634	2.04627	0.782424	0.445492	0.999831	-4.62855	ENSRNOG00000017646	RGD1309651	similar to 1190005I06Rik protein [Source:RGD Symbol;Acc:1309651]
0.196309	3.42634	0.807521	0.431313	0.999831	-4.67401	ENSRNOG00000001228	Pofut2	protein O-fucosyltransferase 2 [Source:RGD Symbol;Acc:1307334]
0.195977	3.88473	1.21589	0.241816	0.999831	-4.55601	ENSRNOG00000017843	Polr3k	RNA polymerase III subunit K [Source:RGD Symbol;Acc:1587294]
0.195906	1.46276	0.698979	0.49469	0.999831	-4.6367	ENSRNOG00000000811	Pkib	cAMP-dependent protein kinase inhibitor beta [Source:RGD Symbol;Acc:3335]
0.195739	3.24937	0.804924	0.432766	0.999831	-4.68437	ENSRNOG00000004766	Glis2	GLIS family zinc finger 2 [Source:RGD Symbol;Acc:1309177]
0.195378	3.54162	0.59165	0.562425	0.999831	-4.71723	ENSRNOG00000017127	Rpl28	ribosomal protein L28 [Source:RGD Symbol;Acc:621193]
0.195295	5.58103	1.3653	0.191214	0.999831	-4.49214	ENSRNOG00000016196	Dlgap1	DLG associated protein 1 [Source:RGD Symbol;Acc:620223]
0.195276	3.0628	1.19812	0.248471	0.999831	-4.5609	ENSRNOG00000020776	Dhcr7	7-dehydrocholesterol reductase [Source:RGD Symbol;Acc:621769]
0.195275	3.79248	0.910613	0.376134	0.999831	-4.67552	ENSRNOG00000006003	Ctnna2	catenin alpha 2 [Source:RGD Symbol;Acc:1305060]
0.195262	1.6939	0.774124	0.450245	0.999831	-4.61949	ENSRNOG00000014132	Mypop	Myb-related transcription factor, partner of profilin [Source:RGD Symbol;Acc:1565160]
0.195113	3.24972	0.69795	0.495316	0.999831	-4.68508	ENSRNOG00000020213	Tubg1	tubulin, gamma 1 [Source:RGD Symbol;Acc:628606]
0.195101	3.13509	1.10905	0.283943	0.999831	-4.58818	ENSRNOG00000032788	Dysf	dysferlin [Source:RGD Symbol;Acc:1311023]
0.19429	5.1693	0.667389	0.514119	0.999831	-4.80583	ENSRNOG00000047737	NA	NA
0.194243	5.1541	0.765919	0.454975	0.999831	-4.77802	ENSRNOG00000016849	Ppp2r5d	protein phosphatase 2, regulatory subunit B', delta [Source:RGD Symbol;Acc:1306666]
0.194207	1.40856	0.355902	0.726604	0.999831	-4.67932	ENSRNOG00000007139	Ttpa	alpha tocopherol transfer protein [Source:RGD Symbol;Acc:3915]
0.194156	4.61283	0.701246	0.493312	0.999831	-4.78763	ENSRNOG00000042903	Cox7a2	cytochrome c oxidase subunit 7A2 [Source:RGD Symbol;Acc:68365]
0.194125	2.20077	0.86648	0.399147	0.999831	-4.62651	ENSRNOG00000030476	Rpl9-ps31	ribosomal protein L9, pseudogene 31 [Source:RGD Symbol;Acc:2322107]
0.194037	2.89221	1.67993	0.11256	0.999831	-4.38867	ENSRNOG00000016696	Angpt2	angiopoietin 2 [Source:RGD Symbol;Acc:621861]
0.194027	2.97505	1.0112	0.327102	0.999831	-4.61299	ENSRNOG00000010421	Wdr91	WD repeat domain 91 [Source:RGD Symbol;Acc:1306697]
0.194025	3.18558	1.55069	0.140702	0.999831	-4.42884	ENSRNOG00000043439	NA	NA
0.193846	5.13438	1.12368	0.277871	0.999831	-4.62651	ENSRNOG00000021758	Tnpo3	transportin 3 [Source:RGD Symbol;Acc:1308938]
0.193801	1.45188	0.167316	0.869237	0.999831	-4.6099	ENSRNOG00000032437	Pard3	par-3 family cell polarity regulator [Source:RGD Symbol;Acc:620374]
0.19374	2.38043	0.614938	0.547319	0.999831	-4.65715	ENSRNOG00000018351	Thap4	THAP domain containing 4 [Source:RGD Symbol;Acc:1359473]
0.193722	6.41478	1.07679	0.297684	0.999831	-4.67983	ENSRNOG00000050690	Nr2e3	nuclear receptor subfamily 2, group E, member 3 [Source:RGD Symbol;Acc:2318602]
0.193581	4.67417	1.87494	0.0793395	0.999831	-4.14579	ENSRNOG00000011193	Hmgcll1	3-hydroxymethyl-3-methylglutaryl-CoA lyase-like 1 [Source:RGD Symbol;Acc:1565090]
0.19341	2.08185	0.875385	0.39443	0.999831	-4.6153	ENSRNOG00000016316	Mcm2	minichromosome maintenance complex component 2 [Source:RGD Symbol;Acc:1305577]
0.193203	1.94802	1.03939	0.314213	0.999831	-4.59573	ENSRNOG00000011445	Nkain1	Sodium/potassium transporting ATPase interacting 1 [Source:RGD Symbol;Acc:1561205]
0.192934	2.21258	0.440612	0.665441	0.999831	-4.65304	ENSRNOG00000006217	Wiz	WIZ zinc finger [Source:RGD Symbol;Acc:1307771]
0.192869	4.30887	0.702042	0.492829	0.999831	-4.75497	ENSRNOG00000058006	Sncg	synuclein, gamma [Source:RGD Symbol;Acc:70996]
0.192784	4.30885	0.39423	0.698662	0.999831	-4.83821	ENSRNOG00000052207	Rps15al4	ribosomal protein S15A-like 4 [Source:RGD Symbol;Acc:2319559]
0.192711	2.94928	0.871103	0.396694	0.999831	-4.64995	ENSRNOG00000047768	Lamb2	laminin subunit beta 2 [Source:RGD Symbol;Acc:2988]
0.192684	2.12533	0.684664	0.503441	0.999831	-4.63945	ENSRNOG00000001273	Psmg3	proteasome assembly chaperone 3 [Source:RGD Symbol;Acc:2319950]
0.19254	3.6466	0.633455	0.535467	0.999831	-4.71318	ENSRNOG00000056946	Scaf1	SR-related CTD-associated factor 1 [Source:RGD Symbol;Acc:708405]
0.192452	1.80422	1.04615	0.311175	0.999831	-4.5938	ENSRNOG00000028713	Acvrl1	activin A receptor like type 1 [Source:RGD Symbol;Acc:2029]
0.1924	2.49513	0.444211	0.662892	0.999831	-4.65918	ENSRNOG00000015202	Dnajc5	DnaJ heat shock protein family (Hsp40) member C5 [Source:RGD Symbol;Acc:620516]
0.192251	2.84299	0.631445	0.536746	0.999831	-4.70243	ENSRNOG00000019689	Vwf	von Willebrand factor [Source:RGD Symbol;Acc:621759]
0.191893	7.18196	1.26761	0.223235	0.999831	-4.567	ENSRNOG00000001194	Rrp1b	ribosomal RNA processing 1B [Source:RGD Symbol;Acc:1305633]
0.191869	3.4799	1.49099	0.155586	0.999831	-4.43524	ENSRNOG00000011203	Farp1	FERM, ARH/RhoGEF and pleckstrin domain protein 1 [Source:RGD Symbol;Acc:1305346]
0.191806	1.82429	0.486472	0.633287	0.999831	-4.63433	ENSRNOG00000020464	Mrpl54	mitochondrial ribosomal protein L54 [Source:RGD Symbol;Acc:1305694]
0.191758	4.17862	0.68721	0.501877	0.999831	-4.74416	ENSRNOG00000030714	Bsn	bassoon (presynaptic cytomatrix protein) [Source:RGD Symbol;Acc:2223]
0.191744	4.16534	0.833266	0.417069	0.999831	-4.70717	ENSRNOG00000020905	Hdac5	histone deacetylase 5 [Source:RGD Symbol;Acc:619980]
0.191648	2.52104	0.669876	0.512574	0.999831	-4.65304	ENSRNOG00000000470	Vps52	VPS52 subunit of GARP complex [Source:RGD Symbol;Acc:3618]
0.191618	2.00039	0.562773	0.581459	0.999831	-4.65081	ENSRNOG00000055309	Drg2	developmentally regulated GTP binding protein 2 [Source:RGD Symbol;Acc:1562380]
0.191412	3.21117	0.539335	0.597147	0.999831	-4.71244	ENSRNOG00000018343	Isca1	iron-sulfur cluster assembly 1 [Source:RGD Symbol;Acc:727792]
0.191342	3.21023	0.746342	0.466382	0.999831	-4.67956	ENSRNOG00000025602	Cdk4	cyclin-dependent kinase 4 [Source:RGD Symbol;Acc:621120]
0.191286	1.59291	0.587349	0.565239	0.999831	-4.65486	ENSRNOG00000014753	Tcf7l1	transcription factor 7 like 1 [Source:RGD Symbol;Acc:1311671]
0.191249	3.36438	0.529274	0.603946	0.999831	-4.70172	ENSRNOG00000008564	Tmem222	transmembrane protein 222 [Source:RGD Symbol;Acc:1304793]
0.191183	4.56968	0.955228	0.353798	0.999831	-4.69421	ENSRNOG00000014645	Aldh7a1	aldehyde dehydrogenase 7 family, member A1 [Source:RGD Symbol;Acc:1308614]
0.191047	2.9377	1.09144	0.291385	0.999831	-4.5911	ENSRNOG00000025811	Cfp	complement factor properdin [Source:RGD Symbol;Acc:1594557]
0.191045	3.2706	1.55324	0.140094	0.999831	-4.42007	ENSRNOG00000014461	Galns	galactosamine (N-acetyl)-6-sulfatase [Source:RGD Symbol;Acc:1565391]
0.19101	3.18692	0.990705	0.336707	0.999831	-4.62402	ENSRNOG00000018425	Dym	dymeclin [Source:RGD Symbol;Acc:1309111]
0.190988	3.31119	1.45063	0.166374	0.999831	-4.45897	ENSRNOG00000053795	Snord45a	small nucleolar RNA, C/D box 45A [Source:RGD Symbol;Acc:41349006]
0.190906	1.93182	1.24788	0.230187	0.999831	-4.56311	ENSRNOG00000012720	Irx4	iroquois homeobox 4 [Source:RGD Symbol;Acc:1309309]
0.190859	1.70811	0.335285	0.741805	0.999831	-4.64017	ENSRNOG00000018803	Mrtfa	myocardin related transcription factor A [Source:RGD Symbol;Acc:1304873]
0.190827	5.87406	0.943504	0.359577	0.999831	-4.72795	ENSRNOG00000008323	Pitpnm3	PITPNM family member 3 [Source:RGD Symbol;Acc:1308200]
0.190408	2.97404	0.746372	0.466364	0.999831	-4.69636	ENSRNOG00000010673	Eral1	Era-like 12S mitochondrial rRNA chaperone 1 [Source:RGD Symbol;Acc:1304714]
0.19035	5.21885	1.05745	0.306151	0.999831	-4.66065	ENSRNOG00000006283	LOC100359922	60S ribosomal protein L13-like [Source:RGD Symbol;Acc:2323122]
0.190305	3.94312	2.42553	0.0276031	0.999831	-3.78887	ENSRNOG00000005478	Fkbp9	FKBP prolyl isomerase 9 [Source:RGD Symbol;Acc:1549757]
0.19008	4.35986	1.63224	0.122324	0.999831	-4.33712	ENSRNOG00000053061	Ubl4a	ubiquitin-like 4A [Source:RGD Symbol;Acc:1563983]
0.190056	3.85056	0.702747	0.492402	0.999831	-4.72609	ENSRNOG00000009667	Mlst8	MTOR associated protein, LST8 homolog [Source:RGD Symbol;Acc:69242]
0.189897	1.55079	0.275693	0.786344	0.999831	-4.62401	ENSRNOG00000047598	NA	NA
0.189879	4.52167	1.5707	0.135989	0.999831	-4.3805	ENSRNOG00000038825	Fabp12	fatty acid binding protein 12 [Source:RGD Symbol;Acc:1565000]
0.189596	2.77221	0.96655	0.348279	0.999831	-4.6243	ENSRNOG00000062101	Ace	angiotensin I converting enzyme [Source:RGD Symbol;Acc:2493]
0.189548	2.21278	0.53607	0.59935	0.999831	-4.68291	ENSRNOG00000005963	Rab2a	RAB2A, member RAS oncogene family [Source:RGD Symbol;Acc:68323]
0.189533	3.63256	0.498509	0.624969	0.999831	-4.77815	ENSRNOG00000011562	Slitrk2	SLIT and NTRK-like family, member 2 [Source:RGD Symbol;Acc:1561361]
0.189451	2.85895	1.32298	0.204602	0.999831	-4.52019	ENSRNOG00000010109	Nol9	nucleolar protein 9 [Source:RGD Symbol;Acc:1566167]
0.189328	1.6593	0.758511	0.459271	0.999831	-4.62493	ENSRNOG00000004049	Baiap2	BAR/IMD domain containing adaptor protein 2 [Source:RGD Symbol;Acc:619814]
0.189248	3.8331	0.816464	0.42633	0.999831	-4.69666	ENSRNOG00000046283	Tmem41a	transmembrane protein 41a [Source:RGD Symbol;Acc:1591692]
0.189218	2.03998	0.716385	0.484171	0.999831	-4.63757	ENSRNOG00000014828	Avpi1	arginine vasopressin-induced 1 [Source:RGD Symbol;Acc:621721]
0.189091	5.44144	2.41561	0.0281537	0.999831	-3.64072	ENSRNOG00000015160	Gem	GTP binding protein overexpressed in skeletal muscle [Source:RGD Symbol;Acc:1307386]
0.189058	2.8225	1.2137	0.242628	0.999831	-4.55563	ENSRNOG00000005540	Nin	ninein [Source:RGD Symbol;Acc:1306492]
0.188916	7.1758	1.27248	0.221544	0.999831	-4.56862	ENSRNOG00000002828	Tob1	transducer of ErbB-2.1 [Source:RGD Symbol;Acc:621126]
0.188765	2.97515	1.21911	0.240627	0.999831	-4.55463	ENSRNOG00000023935	Nrsn2	neurensin 2 [Source:RGD Symbol;Acc:1586322]
0.188433	4.36319	1.21566	0.241901	0.999831	-4.56095	ENSRNOG00000000798	Gnl1	G protein nucleolar 1 [Source:RGD Symbol;Acc:1303051]
0.188432	3.71715	1.21421	0.242441	0.999831	-4.55746	ENSRNOG00000061147	Entrep1	endosomal transmembrane epsin interactor 1 [Source:RGD Symbol;Acc:1307524]
0.188039	5.20515	0.952359	0.355206	0.999831	-4.71849	ENSRNOG00000020058	Celsr2	cadherin, EGF LAG seven-pass G-type receptor 2 [Source:RGD Symbol;Acc:69237]
0.187952	3.02038	0.694802	0.497234	0.999831	-4.64363	ENSRNOG00000027911	Stkld1	serine/threonine kinase-like domain containing 1 [Source:RGD Symbol;Acc:1307355]
0.187931	6.75329	1.00685	0.329124	0.999831	-4.73233	ENSRNOG00000021269	Chgb	chromogranin B [Source:RGD Symbol;Acc:2339]
0.187928	6.40279	0.709373	0.488393	0.999831	-4.83905	ENSRNOG00000015402	Guca1a	guanylate cyclase activator 1A [Source:RGD Symbol;Acc:1308712]
0.187799	4.36479	0.773494	0.450607	0.999831	-4.73437	ENSRNOG00000011927	Sdc3	syndecan 3 [Source:RGD Symbol;Acc:621486]
0.18743	4.19184	2.03045	0.0594289	0.999831	-4.08135	ENSRNOG00000007865	Ephb1	Eph receptor B1 [Source:RGD Symbol;Acc:2556]
0.187405	4.19557	0.821948	0.423293	0.999831	-4.71832	ENSRNOG00000001245	Pcbp3	poly(rC) binding protein 3 [Source:RGD Symbol;Acc:1307430]
0.187335	2.66236	1.17423	0.257637	0.999831	-4.56868	ENSRNOG00000061128	Pelo	pelota mRNA surveillance and ribosome rescue factor [Source:RGD Symbol;Acc:1359591]
0.187262	3.22134	0.732713	0.474425	0.999831	-4.70918	ENSRNOG00000003054	NA	NA
0.187223	3.92699	1.03901	0.314383	0.999831	-4.63847	ENSRNOG00000007947	Fam13a	family with sequence similarity 13, member A [Source:RGD Symbol;Acc:1309807]
0.187161	8.23239	1.94714	0.0694511	0.999831	-4.02179	ENSRNOG00000025768	Clk1	CDC-like kinase 1 [Source:RGD Symbol;Acc:1311469]
0.187072	3.62255	1.03952	0.314154	0.999831	-4.62413	ENSRNOG00000001006	Nptx2	neuronal pentraxin 2 [Source:RGD Symbol;Acc:1309447]
0.186894	2.60508	1.08511	0.294093	0.999831	-4.59126	ENSRNOG00000032539	Spag8	sperm associated antigen 8 [Source:RGD Symbol;Acc:1307079]
0.18676	2.73815	1.16332	0.261904	0.999831	-4.57157	ENSRNOG00000043219	Fbn2	fibrillin 2 [Source:RGD Symbol;Acc:620910]
0.18655	5.28975	0.843852	0.411301	0.999831	-4.76037	ENSRNOG00000016015	Dcp1a	decapping mRNA 1A [Source:RGD Symbol;Acc:1561298]
0.18624	3.66972	0.545154	0.593233	0.999831	-4.73574	ENSRNOG00000047656	Gaa	alpha glucosidase [Source:RGD Symbol;Acc:735227]
0.18614	3.47724	0.392087	0.700213	0.999831	-4.75331	ENSRNOG00000010771	Pkd1	polycystin 1, transient receptor potential channel interacting [Source:RGD Symbol;Acc:3333]
0.186078	3.15598	0.781188	0.446198	0.999831	-4.67303	ENSRNOG00000049959	Igsf21	immunoglobin superfamily, member 21 [Source:RGD Symbol;Acc:1310117]
0.185906	3.48306	1.18013	0.255347	0.999831	-4.56802	ENSRNOG00000002908	Slc35a4	solute carrier family 35, member A4 [Source:RGD Symbol;Acc:628792]
0.185729	2.47772	1.32334	0.204486	0.999831	-4.5321	ENSRNOG00000019012	D2hgdh	D-2-hydroxyglutarate dehydrogenase [Source:RGD Symbol;Acc:1307976]
0.185589	2.94288	1.19037	0.251417	0.999831	-4.56367	ENSRNOG00000032942	Neu1	neuraminidase 1 [Source:RGD Symbol;Acc:3163]
0.185517	3.85219	0.69633	0.496302	0.999831	-4.71929	ENSRNOG00000054838	Mcrs1	microspherule protein 1 [Source:RGD Symbol;Acc:1311607]
0.185468	4.76226	0.914424	0.374189	0.999831	-4.70558	ENSRNOG00000011541	Cygb	cytoglobin [Source:RGD Symbol;Acc:69415]
0.185336	1.62636	0.279196	0.783703	0.999831	-4.63778	ENSRNOG00000060623	Fam3a	FAM3 metabolism regulating signaling molecule A [Source:RGD Symbol;Acc:1562076]
0.18504	3.2381	0.797551	0.436911	0.999831	-4.68828	ENSRNOG00000009772	Kirrel3	kirre like nephrin family adhesion molecule 3 [Source:RGD Symbol;Acc:1311382]
0.184938	5.87603	0.933924	0.364347	0.999831	-4.74493	ENSRNOG00000013604	Gpx4	glutathione peroxidase 4 [Source:RGD Symbol;Acc:69226]
0.18483	3.03294	0.936707	0.362956	0.999831	-4.63379	ENSRNOG00000022448	Htra2	HtrA serine peptidase 2 [Source:RGD Symbol;Acc:1308906]
0.184508	3.55912	0.87939	0.392321	0.999831	-4.66305	ENSRNOG00000020675	Ccdc97	coiled-coil domain containing 97 [Source:RGD Symbol;Acc:1309393]
0.184355	2.18215	1.36373	0.1917	0.999831	-4.52421	ENSRNOG00000027489	Mn1	MN1 proto-oncogene, transcriptional regulator [Source:RGD Symbol;Acc:1565571]
0.184338	0.05272	0.110153	0.91367	0.999831	-4.60138	ENSRNOG00000004319	Lamtor1	late endosomal/lysosomal adaptor, MAPK and MTOR activator 1 [Source:RGD Symbol;Acc:735078]
0.184329	3.22618	0.833333	0.417032	0.999831	-4.66212	ENSRNOG00000042044	Stard3	StAR-related lipid transfer domain containing 3 [Source:RGD Symbol;Acc:1549768]
0.184317	1.87311	1.01431	0.325661	0.999831	-4.60079	ENSRNOG00000037795	Ldlrad1	low density lipoprotein receptor class A domain containing 1 [Source:RGD Symbol;Acc:1597398]
0.184308	3.63998	1.08939	0.292259	0.999831	-4.60171	ENSRNOG00000010005	Ndufb2	NADH:ubiquinone oxidoreductase subunit B2 [Source:RGD Symbol;Acc:1308130]
0.184279	4.53306	2.46798	0.0253613	0.999831	-3.69806	ENSRNOG00000009372	Tacr3	tachykinin receptor 3 [Source:RGD Symbol;Acc:3810]
0.184163	3.84929	0.805201	0.432611	0.999831	-4.71918	ENSRNOG00000007726	Mcam	melanoma cell adhesion molecule [Source:RGD Symbol;Acc:620463]
0.184159	6.31302	1.04227	0.312915	0.999831	-4.70963	ENSRNOG00000005389	Ppp2ca	protein phosphatase 2 catalytic subunit alpha [Source:RGD Symbol;Acc:3380]
0.184154	1.07462	0.5002	0.623804	0.999831	-4.61859	ENSRNOG00000021128	Kcnj11	potassium inwardly-rectifying channel, subfamily J, member 11 [Source:RGD Symbol;Acc:69247]
0.184138	3.36792	1.47811	0.158965	0.999831	-4.45579	ENSRNOG00000004968	Ncapg2	non-SMC condensin II complex, subunit G2 [Source:RGD Symbol;Acc:1308406]
0.184065	3.54905	1.12964	0.275424	0.999831	-4.58612	ENSRNOG00000005766	Tbc1d20	TBC1 domain family, member 20 [Source:RGD Symbol;Acc:1303293]
0.184036	1.43678	0.982835	0.340447	0.999831	-4.60062	ENSRNOG00000054625	Fhod1	formin homology 2 domain containing 1 [Source:RGD Symbol;Acc:1589776]
0.184012	8.46442	2.63697	0.018037	0.999831	-3.36972	ENSRNOG00000017930	Lpcat1	lysophosphatidylcholine acyltransferase 1 [Source:RGD Symbol;Acc:1311599]
0.183865	4.28193	1.29432	0.214087	0.999831	-4.52255	ENSRNOG00000003551	B4galt3	beta-1,4-galactosyltransferase 3 [Source:RGD Symbol;Acc:1359221]
0.18369	2.46174	1.26394	0.224514	0.999831	-4.54726	ENSRNOG00000047545	Adra2a	adrenoceptor alpha 2A [Source:RGD Symbol;Acc:2056]
0.183645	4.2064	0.698079	0.495237	0.999831	-4.74499	ENSRNOG00000014353	Sympk	symplekin scaffold protein [Source:RGD Symbol;Acc:1306735]
0.183472	2.93516	0.90324	0.379915	0.999831	-4.63309	ENSRNOG00000001225	Slx9	SLX9 ribosome biogenesis factor [Source:RGD Symbol;Acc:1311257]
0.183379	3.73625	0.660857	0.51819	0.999831	-4.7227	ENSRNOG00000047134	Gtf2f1	general transcription factor IIF subunit 1 [Source:RGD Symbol;Acc:1359646]
0.183332	1.90198	0.937917	0.362353	0.999831	-4.6115	ENSRNOG00000025059	Nxph4	neurexophilin 4 [Source:RGD Symbol;Acc:628723]
0.183186	6.01298	1.71144	0.106484	0.999831	-4.23194	ENSRNOG00000016122	Hmgcr	3-hydroxy-3-methylglutaryl-CoA reductase [Source:RGD Symbol;Acc:2803]
0.183131	5.22863	0.717895	0.483265	0.999831	-4.79812	ENSRNOG00000061108	Arcn1	archain 1 [Source:RGD Symbol;Acc:1359110]
0.183125	0.992983	0.372943	0.714129	0.999831	-4.61911	ENSRNOG00000019681	Pold1	DNA polymerase delta 1, catalytic subunit [Source:RGD Symbol;Acc:621839]
0.183086	2.06407	0.570925	0.576052	0.999831	-4.63945	ENSRNOG00000017780	Akr7a2	aldo-keto reductase family 7, member A2 [Source:RGD Symbol;Acc:620311]
0.182911	2.9394	1.34515	0.1975	0.999831	-4.51591	ENSRNOG00000018106	Neu3	neuraminidase 3 [Source:RGD Symbol;Acc:619881]
0.182835	3.18065	0.760635	0.458036	0.999831	-4.67905	ENSRNOG00000018047	Gorasp1	golgi reassembly stacking protein 1 [Source:RGD Symbol;Acc:621122]
0.182801	2.57494	0.979412	0.342083	0.999831	-4.62455	ENSRNOG00000016055	Fkrp	fukutin related protein [Source:RGD Symbol;Acc:1305852]
0.182711	6.44332	2.69433	0.0160484	0.999831	-3.33287	ENSRNOG00000017702	Gpld1	glycosylphosphatidylinositol specific phospholipase D1 [Source:RGD Symbol;Acc:631371]
0.182595	3.14955	0.45471	0.655481	0.999831	-4.73858	ENSRNOG00000011254	Fam76a	family with sequence similarity 76, member A [Source:RGD Symbol;Acc:1305162]
0.182592	4.39015	1.29838	0.212723	0.999831	-4.52052	ENSRNOG00000001443	Rhbdd2	rhomboid domain containing 2 [Source:RGD Symbol;Acc:1308231]
0.182573	1.26731	0.204218	0.840781	0.999831	-4.61791	ENSRNOG00000010259	Esrrb	estrogen-related receptor beta [Source:RGD Symbol;Acc:1359557]
0.182561	2.78001	0.899731	0.381723	0.999831	-4.63283	ENSRNOG00000013992	Arfrp1	ADP-ribosylation factor related protein 1 [Source:RGD Symbol;Acc:621683]
0.18251	4.60311	1.08682	0.293361	0.999831	-4.63201	ENSRNOG00000030238	Fndc5	fibronectin type III domain containing 5 [Source:RGD Symbol;Acc:708525]
0.182361	2.10501	0.562317	0.581762	0.999831	-4.64306	ENSRNOG00000024139	Miip	migration and invasion inhibitory protein [Source:RGD Symbol;Acc:1587376]
0.18236	2.72558	1.04335	0.31243	0.999831	-4.60145	ENSRNOG00000025310	Pop7	POP7 homolog, ribonuclease P/MRP subunit [Source:RGD Symbol;Acc:1306413]
0.182344	3.48282	0.829305	0.41924	0.999831	-4.67111	ENSRNOG00000014050	Ptges2	prostaglandin E synthase 2 [Source:RGD Symbol;Acc:1310836]
0.182261	3.93964	1.44732	0.167285	0.999831	-4.44722	ENSRNOG00000019416	Zfp94	zinc finger protein 94 [Source:RGD Symbol;Acc:1560430]
0.182146	4.12943	1.65711	0.117145	0.999831	-4.33338	ENSRNOG00000051529	Opn1mw	opsin 1, medium wave sensitive [Source:RGD Symbol;Acc:620978]
0.18193	4.02235	0.991359	0.336397	0.999831	-4.65116	ENSRNOG00000002753	Adam11	ADAM metallopeptidase domain 11 [Source:RGD Symbol;Acc:1307515]
0.181907	2.45228	0.512203	0.615568	0.999831	-4.65902	ENSRNOG00000020295	Plekhn1	pleckstrin homology domain containing N1 [Source:RGD Symbol;Acc:1311019]
0.181802	1.69931	0.292588	0.77363	0.999831	-4.63911	ENSRNOG00000013987	Sbno2	strawberry notch homolog 2 [Source:RGD Symbol;Acc:1307194]
0.181558	4.3592	0.786449	0.443199	0.999831	-4.72597	ENSRNOG00000020249	P4htm	prolyl 4-hydroxylase, transmembrane [Source:RGD Symbol;Acc:1311848]
0.181493	4.05573	0.694702	0.497295	0.999831	-4.76564	ENSRNOG00000001090	Stard13	StAR-related lipid transfer domain containing 13 [Source:RGD Symbol;Acc:1564816]
0.181144	9.63858	2.06336	0.0558466	0.999831	-3.92988	ENSRNOG00000009629	Car2	carbonic anhydrase 2 [Source:RGD Symbol;Acc:2240]
0.180996	5.9328	3.0107	0.00835692	0.999831	-3.08682	ENSRNOG00000011921	Dusp4	dual specificity phosphatase 4 [Source:RGD Symbol;Acc:620625]
0.18097	1.86215	0.690568	0.499821	0.999831	-4.62602	ENSRNOG00000043267	Mrm2	mitochondrial rRNA methyltransferase 2 [Source:RGD Symbol;Acc:1305944]
0.180775	4.75349	1.53735	0.14392	0.999831	-4.3776	ENSRNOG00000003936	Pwwp2a	PWWP domain containing 2A [Source:RGD Symbol;Acc:1305891]
0.180715	5.40096	0.900251	0.381455	0.999831	-4.75062	ENSRNOG00000054140	Myl6	myosin light chain 6 [Source:RGD Symbol;Acc:1589019]
0.180633	3.09048	1.37989	0.186766	0.999831	-4.49666	ENSRNOG00000011639	Mrpl47	mitochondrial ribosomal protein L47 [Source:RGD Symbol;Acc:1307531]
0.180408	4.47433	0.917547	0.372601	0.999831	-4.6864	ENSRNOG00000020938	Ppp1r15a	protein phosphatase 1, regulatory subunit 15A [Source:RGD Symbol;Acc:621526]
0.180327	4.13284	1.04059	0.313672	0.999831	-4.63271	ENSRNOG00000013947	Rabl2	RAB, member of RAS oncogene family like 2 [Source:RGD Symbol;Acc:1306749]
0.180316	5.91895	1.7648	0.0968448	0.999831	-4.19387	ENSRNOG00000022860	Swi5	SWI5 homologous recombination repair protein [Source:RGD Symbol;Acc:1559966]
0.180306	1.75295	0.54367	0.59423	0.999831	-4.6431	ENSRNOG00000018336	Eps8l2	EPS8-like 2 [Source:RGD Symbol;Acc:1310912]
0.180243	2.2316	0.781988	0.445741	0.999831	-4.62399	ENSRNOG00000032929	Incenp	inner centromere protein [Source:RGD Symbol;Acc:1305292]
0.180237	8.7996	0.897796	0.382723	0.999831	-4.79223	ENSRNOG00000020715	Ddb1	damage-specific DNA binding protein 1 [Source:RGD Symbol;Acc:621889]
0.179721	5.2963	1.71765	0.105321	0.999831	-4.24068	ENSRNOG00000002722	Sec14l1	SEC14-like lipid binding 1 [Source:RGD Symbol;Acc:1563123]
0.179636	2.6387	0.869372	0.397612	0.999831	-4.64018	ENSRNOG00000015625	Matcap1	microtubule associated tyrosine carboxypeptidase 1 [Source:RGD Symbol;Acc:1585272]
0.179589	4.64193	1.0796	0.296466	0.999831	-4.63748	ENSRNOG00000046366	Dmd	dystrophin [Source:RGD Symbol;Acc:2507]
0.179576	3.69836	0.713593	0.485849	0.999831	-4.72129	ENSRNOG00000019985	Asic4	acid sensing ion channel subunit family member 4 [Source:RGD Symbol;Acc:621068]
0.179402	6.87788	1.26605	0.223778	0.999831	-4.57213	ENSRNOG00000001269	Ppp1cc	protein phosphatase 1 catalytic subunit gamma [Source:RGD Symbol;Acc:3377]
0.179341	2.39761	0.535542	0.599706	0.999831	-4.65523	ENSRNOG00000018745	Sgsm3	small G protein signaling modulator 3 [Source:RGD Symbol;Acc:735113]
0.179316	2.49524	1.2279	0.2374	0.999831	-4.55673	ENSRNOG00000037238	Mrm3	mitochondrial rRNA methyltransferase 3 [Source:RGD Symbol;Acc:1309077]
0.17927	3.75362	0.699589	0.494319	0.999831	-4.72326	ENSRNOG00000020191	Tbc1d17	TBC1 domain family, member 17 [Source:RGD Symbol;Acc:1309686]
0.179168	4.88424	1.10296	0.286502	0.999831	-4.63327	ENSRNOG00000005868	Ttc21b	tetratricopeptide repeat domain 21B [Source:RGD Symbol;Acc:1565122]
0.178818	1.78986	0.579423	0.570444	0.999831	-4.66349	ENSRNOG00000016566	Arhgap39	Rho GTPase activating protein 39 [Source:RGD Symbol;Acc:1593158]
0.178729	3.45426	1.11214	0.282655	0.999831	-4.59234	ENSRNOG00000014208	Dctn3	dynactin subunit 3 [Source:RGD Symbol;Acc:1309547]
0.178627	4.87184	1.23852	0.233544	0.999831	-4.55266	ENSRNOG00000009881	Fam161a	FAM161 centrosomal protein A [Source:RGD Symbol;Acc:1304999]
0.178307	2.08316	0.531473	0.602457	0.999831	-4.64035	ENSRNOG00000020608	Ppan	peter pan homolog [Source:RGD Symbol;Acc:1306325]
0.178301	3.05655	0.900927	0.381106	0.999831	-4.64416	ENSRNOG00000008790	Gdap1l1	ganglioside-induced differentiation-associated protein 1-like 1 [Source:RGD Symbol;Acc:1304960]
0.178181	2.40716	0.804625	0.432934	0.999831	-4.6369	ENSRNOG00000019946	Gmppa	GDP-mannose pyrophosphorylase A [Source:RGD Symbol;Acc:1560644]
0.178059	1.83975	1.19152	0.250976	0.999831	-4.57264	ENSRNOG00000014166	Smoc2	SPARC related modular calcium binding 2 [Source:RGD Symbol;Acc:1306681]
0.177952	4.30274	1.19603	0.249263	0.999831	-4.57347	ENSRNOG00000001304	Bcr	BCR activator of RhoGEF and GTPase [Source:RGD Symbol;Acc:1307993]
0.177824	5.4337	1.35823	0.193402	0.999831	-4.49259	ENSRNOG00000003163	Sdhc	succinate dehydrogenase complex subunit C [Source:RGD Symbol;Acc:1359454]
0.177765	2.41169	0.890268	0.386629	0.999831	-4.62706	ENSRNOG00000024641	Nyap1	neuronal tyrosine-phosphorylated phosphoinositide-3-kinase adaptor 1 [Source:RGD Symbol;Acc:1310964]
0.177554	4.85599	1.28098	0.218618	0.999831	-4.53515	ENSRNOG00000003812	Nlgn3	neuroligin 3 [Source:RGD Symbol;Acc:621119]
0.177374	3.82328	1.00071	0.331993	0.999831	-4.64338	ENSRNOG00000047028	Mmp24	matrix metallopeptidase 24 [Source:RGD Symbol;Acc:620202]
0.177114	4.86998	1.77609	0.0949052	0.999831	-4.22083	ENSRNOG00000032152	Rab11fip3	RAB11 family interacting protein 3 [Source:RGD Symbol;Acc:1308952]
0.177067	4.50806	1.42862	0.172514	0.999831	-4.45031	ENSRNOG00000012162	Mpdu1	mannose-P-dolichol utilization defect 1 [Source:RGD Symbol;Acc:1307699]
0.177065	3.86219	0.71907	0.48256	0.999831	-4.72455	ENSRNOG00000052141	NA	NA
0.177006	3.48428	1.51386	0.149735	0.999831	-4.42666	ENSRNOG00000013783	Efhd2	EF-hand domain family, member D2 [Source:RGD Symbol;Acc:1307585]
0.176961	4.03512	0.93529	0.363664	0.999831	-4.67263	ENSRNOG00000014595	Brf1	BRF1, RNA polymerase III transcription initiation factor subunit [Source:RGD Symbol;Acc:1311158]
0.176958	1.49262	0.487277	0.632729	0.999831	-4.63477	ENSRNOG00000016135	Fars2	phenylalanyl-tRNA synthetase 2, mitochondrial [Source:RGD Symbol;Acc:1309416]
0.176911	3.58661	1.27359	0.221161	0.999831	-4.53201	ENSRNOG00000018023	Bin3	bridging integrator 3 [Source:RGD Symbol;Acc:1308253]
0.176887	0.498756	0.103892	0.918557	0.999831	-4.60406	ENSRNOG00000012014	Fhip2b	FHF complex subunit HOOK interacting protein 2B [Source:RGD Symbol;Acc:1308870]
0.176883	2.59461	1.04195	0.313061	0.999831	-4.60082	ENSRNOG00000017690	Ccsap	centriole, cilia and spindle-associated protein [Source:RGD Symbol;Acc:1563235]
0.176848	3.40368	0.976558	0.343451	0.999831	-4.63166	ENSRNOG00000001500	Rab4b	RAB4B, member RAS oncogene family [Source:RGD Symbol;Acc:620931]
0.176836	2.29462	0.812639	0.428457	0.999831	-4.62951	ENSRNOG00000020626	Snrnp25	small nuclear ribonucleoprotein U11/U12 subunit 25 [Source:RGD Symbol;Acc:1310922]
0.176754	5.02364	0.727685	0.477414	0.999831	-4.79658	ENSRNOG00000005804	Eif3d	eukaryotic translation initiation factor 3, subunit D [Source:RGD Symbol;Acc:1303255]
0.176696	6.8497	0.928503	0.367065	0.999831	-4.7652	ENSRNOG00000017883	Camsap1	calmodulin regulated spectrin-associated protein 1 [Source:RGD Symbol;Acc:1565022]
0.176688	4.4468	0.993172	0.33554	0.999831	-4.66159	ENSRNOG00000012394	Bcl2l13	Bcl2-like 13 [Source:RGD Symbol;Acc:1306985]
0.176627	7.16241	0.556955	0.585334	0.999831	-4.94199	ENSRNOG00000016474	Tspan3	tetraspanin 3 [Source:RGD Symbol;Acc:1359444]
0.176624	3.57275	0.508468	0.618126	0.999831	-4.73955	ENSRNOG00000020358	Ptov1	PTOV1, extended AT-hook containing adaptor protein [Source:RGD Symbol;Acc:1306977]
0.176621	2.75281	0.196888	0.846416	0.999831	-4.67219	ENSRNOG00000033568	Mapk8ip3	mitogen-activated protein kinase 8 interacting protein 3 [Source:RGD Symbol;Acc:1563691]
0.176545	2.63121	0.472774	0.642816	0.999831	-4.70312	ENSRNOG00000016046	Hecw1	HECT, C2 and WW domain containing E3 ubiquitin protein ligase 1 [Source:RGD Symbol;Acc:1561038]
0.176534	3.60434	1.25734	0.226833	0.999831	-4.53863	ENSRNOG00000004623	Rag2	recombination activating 2 [Source:RGD Symbol;Acc:1305588]
0.176492	2.49728	1.88137	0.0784101	0.999831	-4.33883	ENSRNOG00000054953	Pcdhb6	protocadherin beta 6 [Source:RGD Symbol;Acc:1306123]
0.176441	3.19411	0.574727	0.57354	0.999831	-4.69879	ENSRNOG00000014626	Katnb1	katanin regulatory subunit B1 [Source:RGD Symbol;Acc:1311256]
0.176364	2.55366	1.31305	0.20785	0.999831	-4.53095	ENSRNOG00000007441	Klhl32	kelch-like family member 32 [Source:RGD Symbol;Acc:1310364]
0.176196	3.8179	1.12182	0.278638	0.999831	-4.59875	ENSRNOG00000030328	Fam98a	family with sequence similarity 98, member A [Source:RGD Symbol;Acc:1305486]
0.176094	3.65728	1.1907	0.251292	0.999831	-4.56448	ENSRNOG00000045775	Rnpepl1	arginyl aminopeptidase like 1 [Source:RGD Symbol;Acc:1595210]
0.176073	6.25017	2.24148	0.0396617	0.999831	-3.76074	ENSRNOG00000009550	Sqle	squalene epoxidase [Source:RGD Symbol;Acc:3755]
0.175987	0.899719	0.342763	0.736278	0.999831	-4.61589	ENSRNOG00000049937	Pdxk	pyridoxal kinase [Source:RGD Symbol;Acc:621324]
0.175962	2.86517	0.37244	0.714496	0.999831	-4.7482	ENSRNOG00000049236	Myh9	myosin, heavy chain 9 [Source:RGD Symbol;Acc:3140]
0.175836	3.06713	1.11674	0.280741	0.999831	-4.58684	ENSRNOG00000038066	Nalf2	NALCN channel auxiliary factor 2 [Source:RGD Symbol;Acc:1584125]
0.17579	2.76557	1.16321	0.26195	0.999831	-4.57161	ENSRNOG00000009972	Rara	retinoic acid receptor, alpha [Source:RGD Symbol;Acc:3534]
0.175696	2.395	0.707741	0.489378	0.999831	-4.64761	ENSRNOG00000032487	Sts	steroid sulfatase [Source:RGD Symbol;Acc:3783]
0.175423	1.15521	0.796915	0.43727	0.999831	-4.63644	ENSRNOG00000010806	Npvf	neuropeptide VF precursor [Source:RGD Symbol;Acc:61815]
0.175325	3.86285	1.96599	0.0670583	0.999831	-4.15673	ENSRNOG00000014801	Exog	exo/endonuclease G [Source:RGD Symbol;Acc:1304628]
0.175322	5.82231	1.25728	0.226853	0.999831	-4.56498	ENSRNOG00000004520	Dync2i1	dynein 2 intermediate chain 1 [Source:RGD Symbol;Acc:1306493]
0.175214	4.26956	2.52138	0.0227856	0.999831	-3.72824	ENSRNOG00000042519	Peak1	pseudopodium-enriched atypical kinase 1 [Source:RGD Symbol;Acc:1312026]
0.17505	2.20887	1.08802	0.292846	0.999831	-4.5881	ENSRNOG00000049326	Tmem234	transmembrane protein 234 [Source:RGD Symbol;Acc:1583487]
0.174876	2.51013	1.01165	0.326892	0.999831	-4.61149	ENSRNOG00000013636	Ppil3	peptidylprolyl isomerase like 3 [Source:RGD Symbol;Acc:631415]
0.174808	3.17571	0.584278	0.567253	0.999831	-4.69579	ENSRNOG00000019407	Dmap1	DNA methyltransferase 1-associated protein 1 [Source:RGD Symbol;Acc:1311295]
0.174747	5.64254	0.417199	0.682126	0.999831	-4.94655	ENSRNOG00000010737	Mbnl2	muscleblind-like splicing regulator 2 [Source:RGD Symbol;Acc:1591755]
0.1747	3.38197	0.580637	0.569646	0.999831	-4.72078	ENSRNOG00000018390	Pld3	phospholipase D family, member 3 [Source:RGD Symbol;Acc:1308248]
0.17455	2.79735	1.39034	0.183631	0.999831	-4.49974	ENSRNOG00000023951	Tbc1d30	TBC1 domain family, member 30 [Source:RGD Symbol;Acc:1305255]
0.174282	5.16899	0.513286	0.614828	0.999831	-4.88126	ENSRNOG00000032058	Pogk	pogo transposable element derived with KRAB domain [Source:RGD Symbol;Acc:1308951]
0.174279	2.64963	1.04391	0.312178	0.999831	-4.59802	ENSRNOG00000058430	Bcdin3d	BCDIN3 domain containing RNA methyltransferase [Source:RGD Symbol;Acc:1306433]
0.174131	1.74639	1.04813	0.310292	0.999831	-4.59353	ENSRNOG00000050137	Ajap1	adherens junctions associated protein 1 [Source:RGD Symbol;Acc:1590138]
0.173957	2.27208	1.63816	0.121073	0.999831	-4.44048	ENSRNOG00000007654	Lrig3	leucine-rich repeats and immunoglobulin-like domains 3 [Source:RGD Symbol;Acc:1561255]
0.173949	1.99943	0.940195	0.361219	0.999831	-4.61402	ENSRNOG00000009206	Fezf2	Fez family zinc finger 2 [Source:RGD Symbol;Acc:1311068]
0.173888	5.71335	1.26717	0.223388	0.999831	-4.55697	ENSRNOG00000000105	Cplx2	complexin 2 [Source:RGD Symbol;Acc:70945]
0.173822	2.91104	0.663458	0.516567	0.999831	-4.68589	ENSRNOG00000016653	Ngef	neuronal guanine nucleotide exchange factor [Source:RGD Symbol;Acc:1309055]
0.173734	4.35882	0.829311	0.419237	0.999831	-4.71679	ENSRNOG00000008812	Tmem214	transmembrane protein 214 [Source:RGD Symbol;Acc:1311324]
0.173703	2.83027	0.705958	0.490456	0.999831	-4.66996	ENSRNOG00000001126	Fbxw8	F-box and WD repeat domain containing 8 [Source:RGD Symbol;Acc:1306032]
0.173678	3.39506	0.813411	0.428027	0.999831	-4.67667	ENSRNOG00000019935	Armc5	armadillo repeat containing 5 [Source:RGD Symbol;Acc:1306553]
0.173601	2.45479	0.551087	0.589255	0.999831	-4.83341	ENSRNOG00000007457	Serping1	serpin family G member 1 [Source:RGD Symbol;Acc:735225]
0.173508	5.60974	1.04067	0.313634	0.999831	-4.68493	ENSRNOG00000052687	Megf8	multiple EGF-like-domains 8 [Source:RGD Symbol;Acc:621190]
0.173464	1.71832	0.478883	0.638558	0.999831	-4.63772	ENSRNOG00000020038	Chpf	chondroitin polymerizing factor [Source:RGD Symbol;Acc:1359458]
0.173418	3.2973	0.733826	0.473766	0.999831	-4.68633	ENSRNOG00000004956	Jade2	jade family PHD finger 2 [Source:RGD Symbol;Acc:1309152]
0.173411	2.92484	0.63035	0.537444	0.999831	-4.68515	ENSRNOG00000003243	Wdr81	WD repeat domain 81 [Source:RGD Symbol;Acc:1311334]
0.173296	6.00423	0.705843	0.490526	0.999831	-4.84818	ENSRNOG00000002369	Rgs8	regulator of G-protein signaling 8 [Source:RGD Symbol;Acc:3571]
0.173072	0.958568	0.321959	0.751689	0.999831	-4.62931	ENSRNOG00000049989	Wdcp	WD repeat and coiled coil containing [Source:RGD Symbol;Acc:1563701]
0.173012	4.31011	0.804913	0.432773	0.999831	-4.72689	ENSRNOG00000007710	Usp20	ubiquitin specific peptidase 20 [Source:RGD Symbol;Acc:1305621]
0.172983	3.63162	0.527467	0.605172	0.999831	-4.75029	ENSRNOG00000019322	Notch1	notch receptor 1 [Source:RGD Symbol;Acc:3187]
0.172894	3.88999	0.944053	0.359305	0.999831	-4.66472	ENSRNOG00000001143	Cit	citron rho-interacting serine/threonine kinase [Source:RGD Symbol;Acc:70878]
0.172874	2.04091	0.772272	0.45131	0.999831	-4.62074	ENSRNOG00000007849	Zmat5	zinc finger, matrin type 5 [Source:RGD Symbol;Acc:1559774]
0.172808	3.19671	0.610874	0.549939	0.999831	-4.69311	ENSRNOG00000010067	Lypla2	lysophospholipase 2 [Source:RGD Symbol;Acc:620210]
0.172575	6.01266	1.50899	0.150965	0.999831	-4.39126	ENSRNOG00000016357	Golm2	golgi membrane protein 2 [Source:RGD Symbol;Acc:1305985]
0.172452	4.87556	2.4758	0.0249674	0.999831	-3.68807	ENSRNOG00000048288	Taf12	TATA-box binding protein associated factor 12 [Source:RGD Symbol;Acc:1592841]
0.172374	2.59133	1.54837	0.141256	0.999831	-4.4411	ENSRNOG00000009522	Adra1a	adrenoceptor alpha 1A [Source:RGD Symbol;Acc:2055]
0.172303	1.81611	1.3344	0.200917	0.999831	-4.54206	ENSRNOG00000013717	Bmp6	bone morphogenetic protein 6 [Source:RGD Symbol;Acc:2214]
0.172127	3.00184	0.798888	0.436158	0.999831	-4.65953	ENSRNOG00000018110	Svil	supervillin [Source:RGD Symbol;Acc:1306354]
0.171783	4.09278	1.47093	0.160875	0.999831	-4.43359	ENSRNOG00000018647	Mrpl20	mitochondrial ribosomal protein L20 [Source:RGD Symbol;Acc:1588219]
0.171708	2.83855	0.326944	0.747986	0.999831	-4.69519	ENSRNOG00000019075	Stat5b	signal transducer and activator of transcription 5B [Source:RGD Symbol;Acc:3774]
0.17163	2.52994	0.591139	0.562759	0.999831	-4.67055	ENSRNOG00000055314	Msrb1	methionine sulfoxide reductase B1 [Source:RGD Symbol;Acc:1583243]
0.171481	5.78362	2.03976	0.0583949	0.999831	-3.95996	ENSRNOG00000003300	Btg2	BTG anti-proliferation factor 2 [Source:RGD Symbol;Acc:2225]
0.171362	4.46682	1.15826	0.263904	0.999831	-4.59367	ENSRNOG00000013128	Tmem179	transmembrane protein 179 [Source:RGD Symbol;Acc:1310269]
0.171228	4.174	1.47992	0.158486	0.999831	-4.41994	ENSRNOG00000005641	Fbxl4	F-box and leucine-rich repeat protein 4 [Source:RGD Symbol;Acc:1305724]
0.171212	2.47729	0.787645	0.442519	0.999831	-4.64676	ENSRNOG00000008857	Adamts10	ADAM metallopeptidase with thrombospondin type 1 motif, 10 [Source:RGD Symbol;Acc:1598320]
0.171014	3.89625	1.33433	0.200939	0.999831	-4.50448	ENSRNOG00000000962	Slc15a4	solute carrier family 15 member 4 [Source:RGD Symbol;Acc:708469]
0.170848	9.53082	1.43948	0.169462	0.999831	-4.44382	ENSRNOG00000013009	Ldha	lactate dehydrogenase A [Source:RGD Symbol;Acc:2996]
0.170821	4.0204	1.71763	0.105326	0.999831	-4.30096	ENSRNOG00000015735	Zswim1	zinc finger, SWIM-type containing 1 [Source:RGD Symbol;Acc:1305715]
0.170679	1.8197	0.740487	0.469827	0.999831	-4.63333	ENSRNOG00000008065	Wwc1	WW and C2 domain containing 1 [Source:RGD Symbol;Acc:1308329]
0.170557	4.53573	0.787301	0.442714	0.999831	-4.7395	ENSRNOG00000022896	Rrp7a	ribosomal RNA processing 7 homolog A [Source:RGD Symbol;Acc:1311547]
0.170546	1.61847	0.664408	0.515975	0.999831	-4.62865	ENSRNOG00000011503	Shb	SH2 domain containing adaptor protein B [Source:RGD Symbol;Acc:1565350]
0.170487	5.40562	0.937392	0.362615	0.999831	-4.73085	ENSRNOG00000009252	Poldip2	DNA polymerase delta interacting protein 2 [Source:RGD Symbol;Acc:1307022]
0.170432	3.5259	0.918647	0.372042	0.999831	-4.65394	ENSRNOG00000010849	Adprs	ADP-ribosylserine hydrolase [Source:RGD Symbol;Acc:1309068]
0.170379	3.76217	0.559996	0.583307	0.999831	-4.7363	ENSRNOG00000029866	Dennd6b	DENN domain containing 6B [Source:RGD Symbol;Acc:1308012]
0.170357	1.63594	0.666692	0.514552	0.999831	-4.63548	ENSRNOG00000008907	Fggy	FGGY carbohydrate kinase domain containing [Source:RGD Symbol;Acc:1359429]
0.170331	3.3857	1.37879	0.187098	0.999831	-4.48849	ENSRNOG00000042860	Pappa2	pappalysin 2 [Source:RGD Symbol;Acc:1591785]
0.170266	1.00777	0.40456	0.691205	0.999831	-4.63747	ENSRNOG00000015807	Pyroxd2	pyridine nucleotide-disulphide oxidoreductase domain 2 [Source:RGD Symbol;Acc:1303232]
0.170213	3.92268	1.46762	0.161762	0.999831	-4.43314	ENSRNOG00000004589	Galnt16	polypeptide N-acetylgalactosaminyltransferase 16 [Source:RGD Symbol;Acc:1310202]
0.170054	2.7204	0.719824	0.482109	0.999831	-4.69251	ENSRNOG00000006174	Grid2	glutamate ionotropic receptor delta type subunit 2 [Source:RGD Symbol;Acc:68368]
0.170048	2.86793	0.813843	0.427787	0.999831	-4.64492	ENSRNOG00000005059	Med22	mediator complex subunit 22 [Source:RGD Symbol;Acc:1564893]
0.17001	7.60219	0.958925	0.35199	0.999831	-4.76435	ENSRNOG00000014162	Plekhb2	pleckstrin homology domain containing B2 [Source:RGD Symbol;Acc:1310954]
0.169937	4.83998	1.61203	0.126677	0.999831	-4.33034	ENSRNOG00000012219	Snrnp40	small nuclear ribonucleoprotein U5 subunit 40 [Source:RGD Symbol;Acc:1309198]
0.16981	6.90745	0.596022	0.559573	0.999831	-4.92419	ENSRNOG00000061544	Spock2	SPARC/osteonectin, cwcv and kazal like domains proteoglycan 2 [Source:RGD Symbol;Acc:1308568]
0.169737	6.2677	0.64757	0.526528	0.999831	-4.86475	ENSRNOG00000019930	Rhot2	ras homolog family member T2 [Source:RGD Symbol;Acc:727970]
0.169655	3.4752	1.67379	0.113778	0.999831	-4.33139	ENSRNOG00000058111	Itga2	integrin subunit alpha 2 [Source:RGD Symbol;Acc:621632]
0.169642	3.2744	1.23822	0.233652	0.999831	-4.54653	ENSRNOG00000012442	Cemip	cell migration inducing hyaluronidase 1 [Source:RGD Symbol;Acc:1305254]
0.169544	4.04624	1.25846	0.22644	0.999831	-4.54017	ENSRNOG00000017907	Ube2i	ubiquitin-conjugating enzyme E2I [Source:RGD Symbol;Acc:3926]
0.169487	5.96255	0.767562	0.454025	0.999831	-4.82537	ENSRNOG00000020897	Prpf19	pre-mRNA processing factor 19 [Source:RGD Symbol;Acc:708496]
0.169353	4.24836	0.803069	0.433807	0.999831	-4.7274	ENSRNOG00000015970	Tbc1d13	TBC1 domain family, member 13 [Source:RGD Symbol;Acc:1591937]
0.169331	3.15819	1.09585	0.289508	0.999831	-4.59481	ENSRNOG00000020010	Kctd13	potassium channel tetramerization domain containing 13 [Source:RGD Symbol;Acc:735189]
0.169092	6.30699	1.56664	0.136934	0.999831	-4.34662	ENSRNOG00000011363	Napepld	N-acyl phosphatidylethanolamine phospholipase D [Source:RGD Symbol;Acc:735197]
0.169048	5.37353	0.861379	0.401867	0.999831	-4.75683	ENSRNOG00000043150	Arfgap1	ADP-ribosylation factor GTPase activating protein 1 [Source:RGD Symbol;Acc:708452]
0.168958	2.71975	0.889077	0.38725	0.999831	-4.63298	ENSRNOG00000017372	Higd2a	HIG1 hypoxia inducible domain family, member 2A [Source:RGD Symbol;Acc:1309691]
0.168789	1.91167	0.446754	0.661093	0.999831	-4.63401	ENSRNOG00000017897	Adam8	ADAM metallopeptidase domain 8 [Source:RGD Symbol;Acc:1566394]
0.168706	3.37475	1.25622	0.227229	0.999831	-4.54057	ENSRNOG00000021548	Rassf1	Ras association domain family member 1 [Source:RGD Symbol;Acc:1359383]
0.168679	-0.65882	0.112871	0.911549	0.999831	-4.60469	ENSRNOG00000018639	Zfand2b	zinc finger AN1-type containing 2B [Source:RGD Symbol;Acc:1306260]
0.168674	5.99911	1.06169	0.304278	0.999831	-4.68416	ENSRNOG00000048194	NA	NA
0.16856	1.89965	0.70429	0.491466	0.999831	-4.63612	ENSRNOG00000018910	Abhd11	abhydrolase domain containing 11 [Source:RGD Symbol;Acc:1304681]
0.168535	3.20671	0.879269	0.392384	0.999831	-4.67434	ENSRNOG00000018770	Pmaip1	phorbol-12-myristate-13-acetate-induced protein 1 [Source:RGD Symbol;Acc:1359266]
0.168462	3.55978	0.627137	0.539494	0.999831	-4.70643	ENSRNOG00000019491	Stard10	StAR-related lipid transfer domain containing 10 [Source:RGD Symbol;Acc:1306548]
0.168441	3.07605	1.14627	0.268687	0.999831	-4.57821	ENSRNOG00000020867	Numbl	NUMB-like, endocytic adaptor protein [Source:RGD Symbol;Acc:1307579]
0.168302	2.57501	1.47661	0.159362	0.999831	-4.48831	ENSRNOG00000017037	Otud3	OTU deubiquitinase 3 [Source:RGD Symbol;Acc:1560468]
0.168185	3.96348	0.82612	0.420992	0.999831	-4.7011	ENSRNOG00000001420	Fis1	fission, mitochondrial 1 [Source:RGD Symbol;Acc:1306668]
0.168172	2.94464	0.741489	0.469236	0.999831	-4.66805	ENSRNOG00000018122	Tspan17	tetraspanin 17 [Source:RGD Symbol;Acc:1311167]
0.167852	2.91305	2.1605	0.0463913	0.999831	-4.15516	ENSRNOG00000020514	Sox6	SRY-box transcription factor 6 [Source:RGD Symbol;Acc:1309000]
0.167814	1.72555	0.709929	0.488057	0.999831	-4.63633	ENSRNOG00000006450	Erbb2	erb-b2 receptor tyrosine kinase 2 [Source:RGD Symbol;Acc:2561]
0.167739	4.43461	0.991885	0.336148	0.999831	-4.6828	ENSRNOG00000008555	Rps20-ps10	ribosomal protein S20, pseudogene 10 [Source:RGD Symbol;Acc:2318734]
0.167679	5.55328	1.24609	0.230826	0.999831	-4.57463	ENSRNOG00000014509	Sacs	sacsin molecular chaperone [Source:RGD Symbol;Acc:1307281]
0.167663	3.17624	0.646115	0.527445	0.999831	-4.6945	ENSRNOG00000001210	Pwp2	PWP2, small subunit processome component [Source:RGD Symbol;Acc:1582817]
0.167585	4.85389	1.47858	0.158841	0.999831	-4.41408	ENSRNOG00000050792	Tnfaip6	TNF alpha induced protein 6 [Source:RGD Symbol;Acc:621359]
0.167469	2.56134	1.40617	0.178966	0.999831	-4.50627	ENSRNOG00000020441	Vps25	vacuolar protein sorting 25 homolog [Source:RGD Symbol;Acc:1584685]
0.167261	3.64017	1.63321	0.122119	0.999831	-4.3539	ENSRNOG00000016483	Myo16	myosin XVI [Source:RGD Symbol;Acc:621561]
0.167158	1.12059	0.456186	0.654441	0.999831	-4.62185	ENSRNOG00000014367	Ephb6	Eph receptor B6 [Source:RGD Symbol;Acc:1306163]
0.167133	3.1763	0.922867	0.369906	0.999831	-4.65434	ENSRNOG00000020450	Slc26a6	solute carrier family 26 member 6 [Source:RGD Symbol;Acc:1310197]
0.167078	3.6844	1.56164	0.138105	0.999831	-4.39987	ENSRNOG00000011112	Fam161b	FAM161 centrosomal protein B [Source:RGD Symbol;Acc:1309058]
0.16705	2.9492	1.2408	0.232725	0.999831	-4.55208	ENSRNOG00000019022	Fam89a	family with sequence similarity 89, member A [Source:RGD Symbol;Acc:1309879]
0.167038	4.91762	0.91561	0.373585	0.999831	-4.72785	ENSRNOG00000010533	Arfip1	ADP-ribosylation factor interacting protein 1 [Source:RGD Symbol;Acc:708401]
0.166913	1.43917	0.833602	0.416885	0.999831	-4.61849	ENSRNOG00000059015	Triobp	TRIO and F-actin binding protein [Source:RGD Symbol;Acc:1308485]
0.166882	6.04929	1.40047	0.180633	0.999831	-4.47255	ENSRNOG00000014368	Eif4g3	eukaryotic translation initiation factor 4 gamma, 3 [Source:RGD Symbol;Acc:1311370]
0.166802	4.04129	1.79799	0.0912419	0.999831	-4.24607	ENSRNOG00000023764	Kctd2	potassium channel tetramerization domain containing 2 [Source:RGD Symbol;Acc:1566063]
0.166603	5.54504	1.63933	0.120828	0.999831	-4.2955	ENSRNOG00000011394	Kif3c	kinesin family member 3C [Source:RGD Symbol;Acc:621538]
0.166528	6.71751	1.06827	0.301391	0.999831	-4.6857	ENSRNOG00000007687	Sema7a	semaphorin 7A (John Milton Hagen blood group) [Source:RGD Symbol;Acc:1305192]
0.166353	6.54846	0.316305	0.755896	0.999831	-4.93072	ENSRNOG00000001156	Msi1	musashi RNA-binding protein 1 [Source:RGD Symbol;Acc:628778]
0.166331	3.64926	1.09135	0.291422	0.999831	-4.59975	ENSRNOG00000023700	C16h19orf44	similar to human chromosome 19 open reading frame 44 [Source:RGD Symbol;Acc:1311847]
0.166251	6.16448	1.02112	0.322524	0.999831	-4.71116	ENSRNOG00000008237	Unc13b	unc-13 homolog B [Source:RGD Symbol;Acc:619723]
0.166211	3.45717	1.57742	0.134437	0.999831	-4.40179	ENSRNOG00000017396	Marchf5	membrane associated ring-CH-type finger 5 [Source:RGD Symbol;Acc:1305617]
0.166102	4.064	1.02773	0.319499	0.999831	-4.63875	ENSRNOG00000017657	Phf23	PHD finger protein 23 [Source:RGD Symbol;Acc:1302969]
0.166009	6.71954	0.457798	0.653308	0.999831	-4.95696	ENSRNOG00000050282	Srcap	Snf2-related CREBBP activator protein [Source:RGD Symbol;Acc:1565642]
0.166004	2.47146	0.814212	0.427581	0.999831	-4.64212	ENSRNOG00000011037	Irx6	iroquois homeobox 6 [Source:RGD Symbol;Acc:1564830]
0.165999	5.78816	0.860904	0.402121	0.999831	-4.78162	ENSRNOG00000005697	Slc6a11	solute carrier family 6 member 11 [Source:RGD Symbol;Acc:628737]
0.16584	4.93985	0.503545	0.621503	0.999831	-4.83944	ENSRNOG00000009329	Nr1d1	nuclear receptor subfamily 1, group D, member 1 [Source:RGD Symbol;Acc:628827]
0.165615	3.819	1.38313	0.185791	0.999831	-4.47931	ENSRNOG00000013588	Glra1	glycine receptor, alpha 1 [Source:RGD Symbol;Acc:2704]
0.165527	3.35642	0.738461	0.471023	0.999831	-4.68138	ENSRNOG00000047625	Atg4d	autophagy related 4D, cysteine peptidase [Source:RGD Symbol;Acc:1596392]
0.165478	3.12445	0.688248	0.501241	0.999831	-4.68997	ENSRNOG00000046211	Fbxw4	F-box and WD repeat domain containing 4 [Source:RGD Symbol;Acc:1306518]
0.165456	1.3667	0.450044	0.65877	0.999831	-4.62615	ENSRNOG00000008378	Pram1	PML-RARA regulated adaptor molecule 1 [Source:RGD Symbol;Acc:1564330]
0.165435	2.87622	0.912097	0.375376	0.999831	-4.63283	ENSRNOG00000015479	Mrps34	mitochondrial ribosomal protein S34 [Source:RGD Symbol;Acc:1305623]
0.165419	4.45601	0.693714	0.497898	0.999831	-4.76439	ENSRNOG00000029572	Apeh	acylaminoacyl-peptide hydrolase [Source:RGD Symbol;Acc:2125]
0.165416	5.62085	2.13739	0.0484966	0.999831	-3.88321	ENSRNOG00000014135	Rab11fip4	RAB11 family interacting protein 4 [Source:RGD Symbol;Acc:1305063]
0.165312	2.85168	0.594283	0.560706	0.999831	-4.68296	ENSRNOG00000018529	Csnk1g2	casein kinase 1, gamma 2 [Source:RGD Symbol;Acc:621407]
0.165275	2.18083	0.559544	0.583608	0.999831	-4.63996	ENSRNOG00000049020	Tceal6	transcription elongation factor A like 6 [Source:RGD Symbol;Acc:1598096]
0.165101	3.97696	0.556401	0.585703	0.999831	-4.80324	ENSRNOG00000003840	Slit2	slit guidance ligand 2 [Source:RGD Symbol;Acc:69310]
0.16495	4.64406	1.08697	0.293297	0.999831	-4.63211	ENSRNOG00000001492	Slc8a2	solute carrier family 8 member A2 [Source:RGD Symbol;Acc:620194]
0.164853	1.32736	0.541992	0.595359	0.999831	-4.62388	ENSRNOG00000026840	Thap3	THAP domain containing 3 [Source:RGD Symbol;Acc:1308109]
0.164691	8.93152	1.7512	0.0992267	0.999831	-4.19536	ENSRNOG00000011923	Mgarp	mitochondria-localized glutamic acid-rich protein [Source:RGD Symbol;Acc:1586369]
0.164689	4.53107	1.24513	0.231169	0.999831	-4.55079	ENSRNOG00000014293	Nkd1	NKD inhibitor of WNT signaling pathway 1 [Source:RGD Symbol;Acc:1308491]
0.164645	4.72851	1.19356	0.2502	0.999831	-4.58004	ENSRNOG00000012985	Pfdn5	prefoldin subunit 5 [Source:RGD Symbol;Acc:1311436]
0.1646	1.94143	0.799189	0.435988	0.999831	-4.63891	ENSRNOG00000014758	Lgi1	leucine-rich, glioma inactivated 1 [Source:RGD Symbol;Acc:628742]
0.164558	4.58155	1.24702	0.230496	0.999831	-4.55011	ENSRNOG00000002546	Rchy1	ring finger and CHY zinc finger domain containing 1 [Source:RGD Symbol;Acc:1359180]
0.164338	1.11653	0.289228	0.776154	0.999831	-4.61601	ENSRNOG00000019271	Ulk4	unc-51 like kinase 4 [Source:RGD Symbol;Acc:1565726]
0.164126	3.47939	1.18179	0.25471	0.999831	-4.56854	ENSRNOG00000025156	NA	NA
0.164037	3.71095	1.54814	0.141313	0.999831	-4.41063	ENSRNOG00000023548	Sned1	sushi, nidogen and EGF-like domains 1 [Source:RGD Symbol;Acc:1566079]
0.16394	3.29247	0.740836	0.469621	0.999831	-4.69033	ENSRNOG00000029028	Mknk2	MAPK interacting serine/threonine kinase 2 [Source:RGD Symbol;Acc:1305728]
0.163911	2.42842	0.61526	0.547112	0.999831	-4.65664	ENSRNOG00000020372	Hdac4	histone deacetylase 4 [Source:RGD Symbol;Acc:619979]
0.163888	1.75625	0.342656	0.736357	0.999831	-4.63962	ENSRNOG00000019308	Arrb2	arrestin, beta 2 [Source:RGD Symbol;Acc:2157]
0.163817	3.63881	0.490621	0.630414	0.999831	-4.77538	ENSRNOG00000000522	Cpne5	copine 5 [Source:RGD Symbol;Acc:1308021]
0.163797	4.30112	1.39943	0.18094	0.999831	-4.46714	ENSRNOG00000014119	Farsb	phenylalanyl-tRNA synthetase subunit beta [Source:RGD Symbol;Acc:1303210]
0.163759	2.35623	0.975687	0.343869	0.999831	-4.61363	ENSRNOG00000010312	Bhlhe23	basic helix-loop-helix family, member e23 [Source:RGD Symbol;Acc:1559760]
0.163744	4.76324	0.911415	0.375724	0.999831	-4.70822	ENSRNOG00000000480	Phf1	PHD finger protein 1 [Source:RGD Symbol;Acc:1303205]
0.16367	3.58492	0.772849	0.450978	0.999831	-4.69299	ENSRNOG00000019918	Coasy	Coenzyme A synthase [Source:RGD Symbol;Acc:1549767]
0.163563	6.56455	1.442	0.16876	0.999831	-4.44193	ENSRNOG00000003626	Atp5pd	ATP synthase peripheral stalk subunit d [Source:RGD Symbol;Acc:620083]
0.163431	4.45106	0.668849	0.513212	0.999831	-4.76809	ENSRNOG00000018795	Rpl18a	ribosomal protein L18A [Source:RGD Symbol;Acc:1302976]
0.163395	5.58099	1.06023	0.304922	0.999831	-4.67187	ENSRNOG00000043377	Fdps	farnesyl diphosphate synthase [Source:RGD Symbol;Acc:68953]
0.163365	4.43868	1.10548	0.285442	0.999831	-4.6137	ENSRNOG00000031269	RGD1304694	similar to CG9646-PA [Source:RGD Symbol;Acc:1304694]
0.1632	4.19529	0.63538	0.534242	0.999831	-4.75772	ENSRNOG00000011427	Hr	HR, lysine demethylase and nuclear receptor corepressor [Source:RGD Symbol;Acc:620634]
0.163117	2.89858	0.5219	0.608953	0.999831	-4.67688	ENSRNOG00000020495	Eif3k	eukaryotic translation initiation factor 3, subunit K [Source:RGD Symbol;Acc:1309221]
0.163108	3.49381	2.10795	0.0513057	0.999831	-4.11561	ENSRNOG00000011296	Cenpn	centromere protein N [Source:RGD Symbol;Acc:1310953]
0.163078	3.07862	1.05652	0.30656	0.999831	-4.60992	ENSRNOG00000016302	Cnnm1	cyclin and CBS domain divalent metal cation transport mediator 1 [Source:RGD Symbol;Acc:1308728]
0.162991	4.73284	0.82105	0.42379	0.999831	-4.77181	ENSRNOG00000006717	Ankrd26	ankyrin repeat domain containing 26 [Source:RGD Symbol;Acc:1310736]
0.162965	2.70185	0.705873	0.490507	0.999831	-4.67589	ENSRNOG00000019656	Btd	biotinidase [Source:RGD Symbol;Acc:1305316]
0.162938	2.62722	0.432865	0.670942	0.999831	-4.68146	ENSRNOG00000012163	Plekhm2	pleckstrin homology and RUN domain containing M2 [Source:RGD Symbol;Acc:1307005]
0.16282	4.36496	0.783176	0.445063	0.999831	-4.73679	ENSRNOG00000000437	Agpat1	1-acylglycerol-3-phosphate O-acyltransferase 1 [Source:RGD Symbol;Acc:1303287]
0.162745	4.25071	1.15999	0.263219	0.999831	-4.59765	ENSRNOG00000022730	Zfp57	zinc finger protein 57 [Source:RGD Symbol;Acc:1302981]
0.16271	2.81591	0.522868	0.608295	0.999831	-4.71159	ENSRNOG00000030345	Rps20-ps11	ribosomal protein S20, pseudogene 11 [Source:RGD Symbol;Acc:2324274]
0.162693	2.75363	0.807438	0.431359	0.999831	-4.64877	ENSRNOG00000023989	Actr5	actin related protein 5 [Source:RGD Symbol;Acc:1307958]
0.162683	2.48014	0.648134	0.526172	0.999831	-4.66578	ENSRNOG00000004310	Caskin2	cask-interacting protein 2 [Source:RGD Symbol;Acc:1309738]
0.162602	6.10162	1.18026	0.255299	0.999831	-4.60423	ENSRNOG00000005957	Slc4a7	solute carrier family 4 member 7 [Source:RGD Symbol;Acc:621208]
0.162424	1.89259	0.595071	0.560192	0.999831	-4.63573	ENSRNOG00000027645	Syndig1l	synapse differentiation inducing 1-like [Source:RGD Symbol;Acc:1589004]
0.162293	4.02951	0.742219	0.468807	0.999831	-4.74105	ENSRNOG00000027194	Sgsm2	small G protein signaling modulator 2 [Source:RGD Symbol;Acc:1306957]
0.162236	2.07604	0.309476	0.760989	0.999831	-4.68629	ENSRNOG00000012799	Prkaa1	protein kinase AMP-activated catalytic subunit alpha 1 [Source:RGD Symbol;Acc:3387]
0.162212	3.04027	0.652603	0.52336	0.999831	-4.68171	ENSRNOG00000001313	Gnaz	G protein subunit alpha z [Source:RGD Symbol;Acc:2717]
0.162118	3.06488	0.818193	0.425371	0.999831	-4.6705	ENSRNOG00000002364	Rnf112	ring finger protein 112 [Source:RGD Symbol;Acc:3986]
0.162044	2.84694	0.511923	0.61576	0.999831	-4.68703	ENSRNOG00000014582	Mrpl18	mitochondrial ribosomal protein L18 [Source:RGD Symbol;Acc:1306387]
0.161975	3.38163	0.689975	0.500183	0.999831	-4.69019	ENSRNOG00000024266	Haus5	HAUS augmin-like complex, subunit 5 [Source:RGD Symbol;Acc:2318093]
0.161969	4.47237	0.904708	0.37916	0.999831	-4.70289	ENSRNOG00000025991	Pex1	peroxisomal biogenesis factor 1 [Source:RGD Symbol;Acc:1559939]
0.161963	6.33783	1.34196	0.198508	0.999831	-4.51703	ENSRNOG00000038004	Zfp804a	zinc finger protein 804A [Source:RGD Symbol;Acc:1305239]
0.161865	1.50981	0.423561	0.677575	0.999831	-4.64648	ENSRNOG00000023226	S100a10	S100 calcium binding protein A10 [Source:RGD Symbol;Acc:628655]
0.161833	4.27106	0.885122	0.389315	0.999831	-4.71102	ENSRNOG00000006027	Eif2ak4	eukaryotic translation initiation factor 2 alpha kinase 4 [Source:RGD Symbol;Acc:1311439]
0.161825	4.44557	1.21099	0.243639	0.999831	-4.55906	ENSRNOG00000013728	Polg2	DNA polymerase gamma 2, accessory subunit [Source:RGD Symbol;Acc:1305128]
0.161737	3.81746	1.36718	0.190638	0.999831	-4.48799	ENSRNOG00000007364	Rab15	RAB15, member RAS oncogene family [Source:RGD Symbol;Acc:735172]
0.161539	3.36549	1.79681	0.0914371	0.999831	-4.28357	ENSRNOG00000028991	AC125757.1	potassium voltage-gated channel subfamily B member 2 [Source:RGD Symbol;Acc:621349]
0.161486	2.77773	0.593501	0.561216	0.999831	-4.68748	ENSRNOG00000050258	Ccnd3	cyclin D3 [Source:RGD Symbol;Acc:2293]
0.161438	3.68587	1.33154	0.201836	0.999831	-4.50495	ENSRNOG00000047605	Ptprk	protein tyrosine phosphatase, receptor type, K [Source:RGD Symbol;Acc:619706]
0.161403	2.24863	0.707946	0.489255	0.999831	-4.66769	ENSRNOG00000011251	Hcrtr2	hypocretin receptor 2 [Source:RGD Symbol;Acc:2788]
0.161391	2.61419	1.24686	0.230552	0.999831	-4.55284	ENSRNOG00000026114	Ap5b1	adaptor related protein complex 5 subunit beta 1 [Source:RGD Symbol;Acc:1562657]
0.161354	2.8692	1.20243	0.246843	0.999831	-4.56057	ENSRNOG00000043060	Dnajc4	DnaJ heat shock protein family (Hsp40) member C4 [Source:RGD Symbol;Acc:1308693]
0.161351	3.90278	1.04255	0.31279	0.999831	-4.63058	ENSRNOG00000055295	Pecr	peroxisomal trans-2-enoyl-CoA reductase [Source:RGD Symbol;Acc:70925]
0.16128	5.64384	1.05398	0.307688	0.999831	-4.6759	ENSRNOG00000017977	Smpd1	sphingomyelin phosphodiesterase 1 [Source:RGD Symbol;Acc:1549719]
0.16125	5.08674	0.778727	0.447606	0.999831	-4.77845	ENSRNOG00000004159	Flii	FLII, actin remodeling protein [Source:RGD Symbol;Acc:1307590]
0.161103	2.55914	1.11647	0.280851	0.999831	-4.58335	ENSRNOG00000012962	Nudt16	nudix hydrolase 16 [Source:RGD Symbol;Acc:1311387]
0.16104	4.68974	2.30146	0.0352751	0.999831	-3.81139	ENSRNOG00000009267	B3gnt2	UDP-GlcNAc:betaGal beta-1,3-N-acetylglucosaminyltransferase 2 [Source:RGD Symbol;Acc:1310077]
0.160932	4.15526	0.953481	0.354655	0.999831	-4.67268	ENSRNOG00000017506	Cltb	clathrin, light chain B [Source:RGD Symbol;Acc:621353]
0.160845	3.68922	0.758123	0.459496	0.999831	-4.78048	ENSRNOG00000018126	Abca1	ATP binding cassette subfamily A member 1 [Source:RGD Symbol;Acc:631344]
0.160751	4.40116	0.592297	0.562002	0.999831	-4.78336	ENSRNOG00000020526	Mau2	MAU2 sister chromatid cohesion factor [Source:RGD Symbol;Acc:1308759]
0.160737	2.6958	1.1105	0.28334	0.999831	-4.58689	ENSRNOG00000015448	Dipk1c	divergent protein kinase domain 1C [Source:RGD Symbol;Acc:1559694]
0.160578	2.23603	0.888133	0.387742	0.999831	-4.62395	ENSRNOG00000021287	Hexim2	HEXIM P-TEFb complex subunit 2 [Source:RGD Symbol;Acc:1311635]
0.160547	2.92571	0.980725	0.341455	0.999831	-4.61847	ENSRNOG00000025512	Mettl17	methyltransferase like 17 [Source:RGD Symbol;Acc:1559895]
0.160528	2.93868	0.968883	0.34715	0.999831	-4.62731	ENSRNOG00000010868	Rims4	regulating synaptic membrane exocytosis 4 [Source:RGD Symbol;Acc:628695]
0.160503	2.00647	0.643017	0.529402	0.999831	-4.63849	ENSRNOG00000050780	Fpgs	folylpolyglutamate synthase [Source:RGD Symbol;Acc:1587713]
0.160495	7.56208	1.17349	0.257924	0.999831	-4.63514	ENSRNOG00000010784	Scg3	secretogranin III [Source:RGD Symbol;Acc:621209]
0.160477	0.707486	0.307422	0.762522	0.999831	-4.61916	ENSRNOG00000019684	Antkmt	adenine nucleotide translocase lysine methyltransferase [Source:RGD Symbol;Acc:1306126]
0.160426	2.74093	1.03679	0.315385	0.999831	-4.60108	ENSRNOG00000019463	Mad2l1bp	MAD2L1 binding protein [Source:RGD Symbol;Acc:1309175]
0.160393	2.07671	0.996376	0.334029	0.999831	-4.60366	ENSRNOG00000014904	Ppp1r3e	protein phosphatase 1, regulatory subunit 3E [Source:RGD Symbol;Acc:1583926]
0.160251	1.71181	0.694702	0.497295	0.999831	-4.62526	ENSRNOG00000058288	Tcf19	transcription factor 19 [Source:RGD Symbol;Acc:1302974]
0.160219	2.04309	0.820335	0.424185	0.999831	-4.62918	ENSRNOG00000020878	Keap1	Kelch-like ECH-associated protein 1 [Source:RGD Symbol;Acc:621619]
0.160183	5.69019	0.805757	0.4323	0.999831	-4.80025	ENSRNOG00000015128	Sae1	SUMO1 activating enzyme subunit 1 [Source:RGD Symbol;Acc:1306098]
0.160145	3.10714	0.708347	0.489012	0.999831	-4.67838	ENSRNOG00000008399	Dcaf4	DDB1 and CUL4 associated factor 4 [Source:RGD Symbol;Acc:1306241]
0.160021	3.9285	0.646663	0.5271	0.999831	-4.74966	ENSRNOG00000046000	Clasrp	CLK4-associating serine/arginine rich protein [Source:RGD Symbol;Acc:1563538]
0.159973	2.58584	1.01131	0.327049	0.999831	-4.60682	ENSRNOG00000050741	Rbm4	RNA binding motif protein 4 [Source:RGD Symbol;Acc:1306891]
0.159831	5.64862	0.983403	0.340176	0.999831	-4.71937	ENSRNOG00000020269	Sugp2	SURP and G patch domain containing 2 [Source:RGD Symbol;Acc:1306042]
0.159739	5.0665	1.42094	0.1747	0.999831	-4.45171	ENSRNOG00000030245	Tango2	transport and golgi organization 2 homolog [Source:RGD Symbol;Acc:1310348]
0.159672	7.1113	0.72674	0.477977	0.999831	-4.88237	ENSRNOG00000014501	Zfp638	zinc finger protein 638 [Source:RGD Symbol;Acc:1309746]
0.15961	4.0019	0.774034	0.450297	0.999831	-4.73357	ENSRNOG00000003424	Elac2	elaC ribonuclease Z 2 [Source:RGD Symbol;Acc:628882]
0.159583	5.54444	1.76172	0.0973803	0.999831	-4.20455	ENSRNOG00000019325	Rnf185	ring finger protein 185 [Source:RGD Symbol;Acc:1564777]
0.159578	4.70797	0.848689	0.408683	0.999831	-4.73746	ENSRNOG00000011295	Anapc2	anaphase promoting complex subunit 2 [Source:RGD Symbol;Acc:1305546]
0.159465	3.52223	1.52749	0.146338	0.999831	-4.42328	ENSRNOG00000018040	Gins4	GINS complex subunit 4 [Source:RGD Symbol;Acc:1307397]
0.15941	1.84927	0.941807	0.360418	0.999831	-4.61348	ENSRNOG00000003807	Wnt9b	Wnt family member 9B [Source:RGD Symbol;Acc:1309574]
0.159381	3.98882	2.18661	0.0441142	0.999831	-4.00399	ENSRNOG00000011300	Lama3	laminin subunit alpha 3 [Source:RGD Symbol;Acc:628776]
0.159374	1.58915	0.784852	0.444108	0.999831	-4.61884	ENSRNOG00000023643	Mmp17	matrix metallopeptidase 17 [Source:RGD Symbol;Acc:1311541]
0.159352	3.5822	0.5502	0.589849	0.999831	-4.73357	ENSRNOG00000030597	Ankrd52	ankyrin repeat domain 52 [Source:RGD Symbol;Acc:1307124]
0.159291	2.10715	0.559759	0.583465	0.999831	-4.64646	ENSRNOG00000016889	Fancc	FA complementation group C [Source:RGD Symbol;Acc:2593]
0.159288	2.14404	0.377883	0.710528	0.999831	-4.64674	ENSRNOG00000039417	Dda1	DET1 and DDB1 associated 1 [Source:RGD Symbol;Acc:1584153]
0.159071	4.36381	0.794498	0.438635	0.999831	-4.73804	ENSRNOG00000009377	Nelfb	negative elongation factor complex member B [Source:RGD Symbol;Acc:1307832]
0.159009	1.51824	0.601677	0.555894	0.999831	-4.64854	ENSRNOG00000028089	Apobec4	apolipoprotein B mRNA editing enzyme catalytic polypeptide like 4 [Source:RGD Symbol;Acc:1560256]
0.158991	3.92713	1.15073	0.266899	0.999831	-4.58844	ENSRNOG00000019850	Speg	striated muscle enriched protein kinase [Source:RGD Symbol;Acc:2124]
0.158737	2.16675	0.858372	0.403475	0.999831	-4.62668	ENSRNOG00000016484	Gstk1	glutathione S-transferase kappa 1 [Source:RGD Symbol;Acc:735188]
0.158737	3.43989	0.775025	0.449728	0.999831	-4.68157	ENSRNOG00000000661	Hps4	HPS4, biogenesis of lysosomal organelles complex 3 subunit 2 [Source:RGD Symbol;Acc:1308070]
0.158646	5.47924	1.42623	0.173193	0.999831	-4.44886	ENSRNOG00000028292	Gart	phosphoribosylglycinamide formyltransferase, phosphoribosylglycinamide synthetase, phosphoribosylaminoimidazole synthetase [Source:RGD Symbol;Acc:1308717]
0.158231	3.87314	0.808416	0.430812	0.999831	-4.71157	ENSRNOG00000021103	Nrxn2	neurexin 2 [Source:RGD Symbol;Acc:620211]
0.158189	2.36099	0.692455	0.498667	0.999831	-4.65419	ENSRNOG00000021380	Fads6	fatty acid desaturase 6 [Source:RGD Symbol;Acc:1311950]
0.157965	4.00246	1.87916	0.0787283	0.999831	-4.19156	ENSRNOG00000002778	Aatf	apoptosis antagonizing transcription factor [Source:RGD Symbol;Acc:620685]
0.157814	4.25865	1.49276	0.155126	0.999831	-4.40907	ENSRNOG00000009795	Nfib	nuclear factor I/B [Source:RGD Symbol;Acc:62015]
0.157754	1.3832	0.503067	0.621832	0.999831	-4.64662	ENSRNOG00000009886	Fkbp14	FKBP prolyl isomerase 14 [Source:RGD Symbol;Acc:1311705]
0.157728	5.0074	1.40692	0.178748	0.999831	-4.46118	ENSRNOG00000008421	Klhl5	kelch-like family member 5 [Source:RGD Symbol;Acc:1309661]
0.157686	3.82931	0.629652	0.537889	0.999831	-4.75847	ENSRNOG00000045605	Uxs1	UDP-glucuronate decarboxylase 1 [Source:RGD Symbol;Acc:628680]
0.157681	5.25359	0.651243	0.524215	0.999831	-4.84038	ENSRNOG00000061845	Cttnbp2	cortactin binding protein 2 [Source:RGD Symbol;Acc:628691]
0.157574	2.29621	1.13652	0.272624	0.999831	-4.57858	ENSRNOG00000025353	Ears2	glutamyl-tRNA synthetase 2, mitochondrial [Source:RGD Symbol;Acc:1307904]
0.157529	3.28448	1.51915	0.148408	0.999831	-4.4199	ENSRNOG00000006956	Adamtsl1	ADAMTS-like 1 [Source:RGD Symbol;Acc:1306439]
0.157496	0.695211	0.0764044	0.940053	0.999831	-4.60815	ENSRNOG00000014375	Adgrb2	adhesion G protein-coupled receptor B2 [Source:RGD Symbol;Acc:1309431]
0.157459	1.35432	0.425527	0.676171	0.999831	-4.62664	ENSRNOG00000019361	Inpp5j	inositol polyphosphate-5-phosphatase J [Source:RGD Symbol;Acc:620541]
0.157235	3.17939	0.820354	0.424174	0.999831	-4.66954	ENSRNOG00000048747	Cdk5rap3	CDK5 regulatory subunit associated protein 3 [Source:RGD Symbol;Acc:620002]
0.157089	3.49948	1.36584	0.19105	0.999831	-4.49038	ENSRNOG00000027944	Pnma8a	PNMA family member 8A [Source:RGD Symbol;Acc:1310803]
0.157079	8.55985	0.721206	0.481281	0.999831	-4.87686	ENSRNOG00000011452	Aldoc	aldolase, fructose-bisphosphate C [Source:RGD Symbol;Acc:2091]
0.157069	3.02528	0.683556	0.504122	0.999831	-4.69112	ENSRNOG00000001297	Prmt2	protein arginine methyltransferase 2 [Source:RGD Symbol;Acc:1565519]
0.157043	5.07957	1.10523	0.285549	0.999831	-4.63767	ENSRNOG00000050061	NA	NA
0.156913	5.37094	2.29563	0.0356806	0.999831	-3.75733	ENSRNOG00000012325	Adk	adenosine kinase [Source:RGD Symbol;Acc:2046]
0.156824	2.66712	0.693879	0.497797	0.999831	-4.68499	ENSRNOG00000050413	Samd15	sterile alpha motif domain containing 15 [Source:RGD Symbol;Acc:1589368]
0.156784	4.4273	0.803395	0.433624	0.999831	-4.74485	ENSRNOG00000005257	Prkaca	protein kinase cAMP-activated catalytic subunit alpha [Source:RGD Symbol;Acc:3389]
0.156432	2.88755	0.525051	0.606811	0.999831	-4.6893	ENSRNOG00000011315	Med16	mediator complex subunit 16 [Source:RGD Symbol;Acc:1308001]
0.156376	1.88879	0.941416	0.360613	0.999831	-4.60898	ENSRNOG00000013795	Asb7	ankyrin repeat and SOCS box-containing 7 [Source:RGD Symbol;Acc:1305154]
0.156342	6.06085	1.49323	0.155005	0.999831	-4.40266	ENSRNOG00000018518	Prr14	proline rich 14 [Source:RGD Symbol;Acc:1594592]
0.156184	2.61834	0.708378	0.488993	0.999831	-4.65466	ENSRNOG00000018531	Mrps11	mitochondrial ribosomal protein S11 [Source:RGD Symbol;Acc:1559901]
0.156183	4.24657	0.694795	0.497238	0.999831	-4.75242	ENSRNOG00000019294	Stk16	serine/threonine kinase 16 [Source:RGD Symbol;Acc:629474]
0.15612	3.41304	0.911134	0.375867	0.999831	-4.64476	ENSRNOG00000006049	Rfx1	regulatory factor X1 [Source:RGD Symbol;Acc:1306574]
0.156109	4.12353	0.996908	0.333779	0.999831	-4.65059	ENSRNOG00000021054	Men1	menin 1 [Source:RGD Symbol;Acc:3078]
0.156106	4.20325	1.00624	0.329406	0.999831	-4.65415	ENSRNOG00000012634	Fbxo10	F-box protein 10 [Source:RGD Symbol;Acc:1305465]
0.156093	4.58818	1.90365	0.0752653	0.999831	-4.14463	ENSRNOG00000009302	Zfp623	zinc finger protein 623 [Source:RGD Symbol;Acc:7635192]
0.156089	3.64631	1.45735	0.164536	0.999831	-4.44758	ENSRNOG00000012185	Zfyve21	zinc finger FYVE-type containing 21 [Source:RGD Symbol;Acc:1311036]
0.15606	3.20605	1.0927	0.290849	0.999831	-4.59354	ENSRNOG00000005479	Slc1a2	solute carrier family 1 member 2 [Source:RGD Symbol;Acc:3697]
0.155948	5.8528	1.61218	0.126644	0.999831	-4.31435	ENSRNOG00000021824	Dnajb1	DnaJ heat shock protein family (Hsp40) member B1 [Source:RGD Symbol;Acc:1304725]
0.155813	2.48842	0.725402	0.478774	0.999831	-4.66753	ENSRNOG00000050550	Nr2e1	nuclear receptor subfamily 2, group E, member 1 [Source:RGD Symbol;Acc:1595162]
0.155808	2.53552	0.636414	0.533585	0.999831	-4.66172	ENSRNOG00000013456	Ighmbp2	immunoglobulin mu DNA binding protein 2 [Source:RGD Symbol;Acc:68325]
0.15572	3.80803	0.656069	0.521186	0.999831	-4.7594	ENSRNOG00000020590	Adam15	ADAM metallopeptidase domain 15 [Source:RGD Symbol;Acc:620402]
0.155632	2.76479	0.559204	0.583834	0.999831	-4.6764	ENSRNOG00000020457	Tacc2	transforming, acidic coiled-coil containing protein 2 [Source:RGD Symbol;Acc:1303004]
0.15551	6.1975	0.518751	0.611097	0.999831	-4.9041	ENSRNOG00000036833	Zfp385a	zinc finger protein 385A [Source:RGD Symbol;Acc:1593784]
0.155156	2.80017	0.901287	0.38092	0.999831	-4.63645	ENSRNOG00000021615	Mettl26	methyltransferase like 26 [Source:RGD Symbol;Acc:1307155]
0.155075	4.27721	0.994475	0.334925	0.999831	-4.68623	ENSRNOG00000014658	Zfp423	zinc finger protein 423 [Source:RGD Symbol;Acc:621664]
0.155069	2.21693	0.820324	0.424191	0.999831	-4.62454	ENSRNOG00000005634	Lingo2	leucine rich repeat and Ig domain containing 2 [Source:RGD Symbol;Acc:1310773]
0.154973	2.64339	0.410073	0.687239	0.999831	-4.69037	ENSRNOG00000012396	Rgr	retinal G protein coupled receptor [Source:RGD Symbol;Acc:1309174]
0.154715	5.45523	1.3276	0.203107	0.999831	-4.51461	ENSRNOG00000058842	Sptbn2	spectrin, beta, non-erythrocytic 2 [Source:RGD Symbol;Acc:3751]
0.15468	5.51306	0.708463	0.488942	0.999831	-4.82842	ENSRNOG00000013825	Rap1gap	Rap1 GTPase-activating protein [Source:RGD Symbol;Acc:1309908]
0.154578	3.80161	0.51922	0.610778	0.999831	-4.72111	ENSRNOG00000000857	Msh5	mutS homolog 5 [Source:RGD Symbol;Acc:1303008]
0.154559	2.78886	0.795162	0.438259	0.999831	-4.67659	ENSRNOG00000015418	Klhl14	kelch-like family member 14 [Source:RGD Symbol;Acc:1566178]
0.154342	1.374	0.390586	0.701301	0.999831	-4.62722	ENSRNOG00000001222	Ube2g2	ubiquitin-conjugating enzyme E2G 2 [Source:RGD Symbol;Acc:1304860]
0.154243	2.57639	1.38994	0.183751	0.999831	-4.50943	ENSRNOG00000002052	Ccdc80	coiled-coil domain containing 80 [Source:RGD Symbol;Acc:69421]
0.154239	5.09914	0.953497	0.354648	0.999831	-4.70511	ENSRNOG00000018746	Slc30a5	solute carrier family 30 member 5 [Source:RGD Symbol;Acc:1306931]
0.154207	5.05325	0.82203	0.423248	0.999831	-4.77013	ENSRNOG00000059116	NA	NA
0.154141	2.51697	0.472289	0.643154	0.999831	-4.6833	ENSRNOG00000016177	Scara3	scavenger receptor class A, member 3 [Source:RGD Symbol;Acc:1309269]
0.153975	1.32856	0.409197	0.687868	0.999831	-4.62548	ENSRNOG00000007622	Arrdc1	arrestin domain containing 1 [Source:RGD Symbol;Acc:1309961]
0.153964	2.5504	0.794402	0.438689	0.999831	-4.64581	ENSRNOG00000054734	LOC108351043	uncharacterized LOC108351043 [Source:RGD Symbol;Acc:11378091]
0.153923	4.13464	0.665584	0.515242	0.999831	-4.76059	ENSRNOG00000007901	Tmed10	transmembrane p24 trafficking protein 10 [Source:RGD Symbol;Acc:620970]
0.153861	7.23221	1.91188	0.0741332	0.999831	-4.05262	ENSRNOG00000013491	Setx	senataxin [Source:RGD Symbol;Acc:1565575]
0.153771	4.054	0.975563	0.343929	0.999831	-4.65779	ENSRNOG00000027628	Elp5	elongator acetyltransferase complex subunit 5 [Source:RGD Symbol;Acc:1303303]
0.153644	3.02825	0.820868	0.42389	0.999831	-4.66366	ENSRNOG00000056092	Hephl1	hephaestin-like 1 [Source:RGD Symbol;Acc:1564835]
0.153568	5.243	0.903103	0.379985	0.999831	-4.7392	ENSRNOG00000059344	Tpcn1	two pore segment channel 1 [Source:RGD Symbol;Acc:708494]
0.153503	1.43291	0.252073	0.804223	0.999831	-4.62512	ENSRNOG00000016275	Ttr	transthyretin [Source:RGD Symbol;Acc:3916]
0.153491	4.95987	0.941513	0.360564	0.999831	-4.70103	ENSRNOG00000019677	Arid3b	AT-rich interaction domain 3B [Source:RGD Symbol;Acc:1306335]
0.153483	3.80546	0.979574	0.342005	0.999831	-4.64846	ENSRNOG00000060853	Iah1	isoamyl acetate hydrolyzing esterase 1 [Source:RGD Symbol;Acc:727866]
0.153389	1.82424	0.473865	0.642055	0.999831	-4.63387	ENSRNOG00000004229	Tac3	tachykinin precursor 3 [Source:RGD Symbol;Acc:3809]
0.153106	4.14106	2.02713	0.0598022	0.999831	-4.06946	ENSRNOG00000013257	Hecw2	HECT, C2 and WW domain containing E3 ubiquitin protein ligase 2 [Source:RGD Symbol;Acc:1593244]
0.153084	4.01281	0.963749	0.349639	0.999831	-4.65932	ENSRNOG00000023363	Ing4	inhibitor of growth family, member 4 [Source:RGD Symbol;Acc:1309407]
0.153061	4.58247	1.13727	0.272318	0.999831	-4.60476	ENSRNOG00000008944	Ext2	exostosin glycosyltransferase 2 [Source:RGD Symbol;Acc:1307707]
0.152901	4.96172	1.39993	0.180793	0.999831	-4.46594	ENSRNOG00000001854	Tmtc1	transmembrane O-mannosyltransferase targeting cadherins 1 [Source:RGD Symbol;Acc:1564868]
0.152688	3.64468	0.831288	0.418152	0.999831	-4.68852	ENSRNOG00000028097	Slc7a14	solute carrier family 7, member 14 [Source:RGD Symbol;Acc:1594375]
0.152626	2.24739	0.945933	0.358374	0.999831	-4.61416	ENSRNOG00000045889	LOC688282	RIKEN cDNA 6030468B19 gene [Source:MGI Symbol;Acc:MGI:1924977]
0.152395	2.36073	0.862203	0.401427	0.999831	-4.6369	ENSRNOG00000011321	Rftn1	raftlin lipid raft linker 1 [Source:RGD Symbol;Acc:1563347]
0.152383	5.57946	0.402457	0.692721	0.999831	-4.88666	ENSRNOG00000006766	Laptm4b	lysosomal protein transmembrane 4 beta [Source:RGD Symbol;Acc:1311853]
0.152254	3.15287	0.950034	0.35635	0.999831	-4.62931	ENSRNOG00000061039	Prpf31	pre-mRNA processing factor 31 [Source:RGD Symbol;Acc:1305832]
0.152017	7.11489	1.72605	0.103765	0.999831	-4.21683	ENSRNOG00000017022	Cerk	ceramide kinase [Source:RGD Symbol;Acc:1305019]
0.15198	2.54895	0.6477	0.526446	0.999831	-4.6733	ENSRNOG00000004763	Sirpa	signal-regulatory protein alpha [Source:RGD Symbol;Acc:3449]
0.151861	5.6351	0.743882	0.467828	0.999831	-4.82651	ENSRNOG00000009066	Thra	thyroid hormone receptor alpha [Source:RGD Symbol;Acc:3857]
0.151795	5.44087	1.16117	0.262755	0.999831	-4.61883	ENSRNOG00000015576	Hsdl1	hydroxysteroid dehydrogenase like 1 [Source:RGD Symbol;Acc:1308433]
0.15162	3.36605	0.532303	0.601895	0.999831	-4.72783	ENSRNOG00000006747	Cc2d1a	coiled-coil and C2 domain containing 1A [Source:RGD Symbol;Acc:1306108]
0.151335	2.51144	0.38559	0.704923	0.999831	-4.69283	ENSRNOG00000017631	Cyp20a1	cytochrome P450, family 20, subfamily a, polypeptide 1 [Source:RGD Symbol;Acc:735221]
0.151298	3.62081	0.392459	0.699944	0.999831	-4.79913	ENSRNOG00000002215	Mylk	myosin light chain kinase [Source:RGD Symbol;Acc:1310915]
0.151266	5.10784	1.08889	0.292473	0.999831	-4.65858	ENSRNOG00000004918	Kcna4	potassium voltage-gated channel subfamily A member 4 [Source:RGD Symbol;Acc:2952]
0.151219	2.97892	1.3176	0.206356	0.999831	-4.52088	ENSRNOG00000010071	C2h4orf46	similar to human chromosome 4 open reading frame 46 [Source:RGD Symbol;Acc:1560010]
0.151185	1.77277	0.313614	0.757902	0.999831	-4.6321	ENSRNOG00000048320	Ndufa11	NADH:ubiquinone oxidoreductase subunit A11 [Source:RGD Symbol;Acc:1303292]
0.151025	2.37647	1.31373	0.207626	0.999831	-4.52267	ENSRNOG00000025115	Exph5	exophilin 5 [Source:RGD Symbol;Acc:1560308]
0.151004	4.16593	0.793128	0.43941	0.999831	-4.72433	ENSRNOG00000020527	Drap1	Dr1 associated protein 1 [Source:RGD Symbol;Acc:1308477]
0.150973	6.11493	1.00278	0.331022	0.999831	-4.72063	ENSRNOG00000000957	Rpl21	ribosomal protein L21 [Source:RGD Symbol;Acc:68390]
0.150921	2.87722	1.6783	0.112883	0.999831	-4.39126	ENSRNOG00000037204	Lyrm9	LYR motif containing 9 [Source:RGD Symbol;Acc:1562012]
0.150917	4.28231	1.98471	0.0647558	0.999831	-4.1079	ENSRNOG00000017600	Ptpn9	protein tyrosine phosphatase, non-receptor type 9 [Source:RGD Symbol;Acc:628726]
0.150811	2.17564	0.667613	0.51398	0.999831	-4.64997	ENSRNOG00000018557	Cdh22	cadherin 22 [Source:RGD Symbol;Acc:2321]
0.150752	2.81373	1.02057	0.322776	0.999831	-4.60645	ENSRNOG00000042786	Vti1a	vesicle transport through interaction with t-SNAREs 1A [Source:RGD Symbol;Acc:621490]
0.150606	3.72806	0.68931	0.500591	0.999831	-4.72975	ENSRNOG00000045926	Lrrc45	leucine rich repeat containing 45 [Source:RGD Symbol;Acc:1590053]
0.15055	4.33023	1.55111	0.140602	0.999831	-4.39355	ENSRNOG00000025946	Igf2bp2	insulin-like growth factor 2 mRNA binding protein 2 [Source:RGD Symbol;Acc:1305614]
0.150423	2.75688	0.497614	0.625585	0.999831	-4.67675	ENSRNOG00000020946	Ccdc12	coiled-coil domain containing 12 [Source:RGD Symbol;Acc:1306081]
0.150412	0.355796	0.117165	0.908201	0.999831	-4.6041	ENSRNOG00000030747	Rpl38-ps8	ribosomal protein L38, pseudogene 8 [Source:RGD Symbol;Acc:1596041]
0.150412	0.355796	0.117165	0.908201	0.999831	-4.6041	ENSRNOG00000033686	Rpl38	ribosomal protein L38 [Source:RGD Symbol;Acc:1305573]
0.150412	0.355796	0.117165	0.908201	0.999831	-4.6041	ENSRNOG00000049047	Rpl38-ps9	ribosomal protein L38, pseudogene 9 [Source:RGD Symbol;Acc:1587812]
0.150248	5.65362	1.84672	0.0835339	0.999831	-4.12831	ENSRNOG00000008428	Drd2	dopamine receptor D2 [Source:RGD Symbol;Acc:2520]
0.150199	7.82922	1.0418	0.313128	0.999831	-4.71737	ENSRNOG00000001628	Pcp4	Purkinje cell protein 4 [Source:RGD Symbol;Acc:3271]
0.150158	2.74105	1.22094	0.23995	0.999831	-4.55375	ENSRNOG00000000869	Arhgef6	Rac/Cdc42 guanine nucleotide exchange factor 6 [Source:RGD Symbol;Acc:1359674]
0.15009	1.84461	0.588409	0.564545	0.999831	-4.65493	ENSRNOG00000050697	Ctsz	cathepsin Z [Source:RGD Symbol;Acc:708479]
0.150085	4.46372	1.43508	0.170695	0.999831	-4.44634	ENSRNOG00000026799	Zbtb9	zinc finger and BTB domain containing 9 [Source:RGD Symbol;Acc:1303050]
0.149861	3.88408	0.544091	0.593947	0.999831	-4.76981	ENSRNOG00000018337	Caly	calcyon neuron-specific vesicular protein [Source:RGD Symbol;Acc:621719]
0.149815	3.24626	0.46413	0.648862	0.999831	-4.81077	ENSRNOG00000047581	LOC100360856	hypothetical protein LOC100360856 [Source:RGD Symbol;Acc:2321302]
0.149798	5.39655	1.19502	0.249645	0.999831	-4.60184	ENSRNOG00000023601	Elavl4	ELAV like RNA binding protein 4 [Source:RGD Symbol;Acc:1560027]
0.149694	2.58876	0.524852	0.606946	0.999831	-4.70678	ENSRNOG00000046133	NA	NA
0.149658	5.25665	1.20849	0.244572	0.999831	-4.58326	ENSRNOG00000015591	Cndp2	carnosine dipeptidase 2 [Source:RGD Symbol;Acc:1305827]
0.149625	6.69181	0.584496	0.56711	0.999831	-4.90315	ENSRNOG00000043215	Rtbdn	retbindin [Source:RGD Symbol;Acc:1308534]
0.149566	4.36952	0.931752	0.365434	0.999831	-4.69113	ENSRNOG00000001348	Erp29	endoplasmic reticulum protein 29 [Source:RGD Symbol;Acc:619781]
0.149525	7.19561	1.40833	0.178335	0.999831	-4.46981	ENSRNOG00000014215	Klf9	KLF transcription factor 9 [Source:RGD Symbol;Acc:70934]
0.149487	2.30737	1.02251	0.321887	0.999831	-4.60112	ENSRNOG00000004487	Nek2l1	NIMA (never in mitosis gene a)-related kinase 2-like 1 [Source:RGD Symbol;Acc:1582899]
0.149444	2.45075	0.497788	0.625465	0.999831	-4.69817	ENSRNOG00000054581	Tmem101	transmembrane protein 101 [Source:RGD Symbol;Acc:1306490]
0.149392	6.15325	0.718479	0.482915	0.999831	-4.85092	ENSRNOG00000045636	Fasn	fatty acid synthase [Source:RGD Symbol;Acc:620665]
0.149372	5.30303	0.664605	0.515852	0.999831	-4.81701	ENSRNOG00000008862	Abcg4	ATP binding cassette subfamily G member 4 [Source:RGD Symbol;Acc:1305840]
0.149226	2.77363	0.979485	0.342048	0.999831	-4.67469	ENSRNOG00000010319	Lcp1	lymphocyte cytosolic protein 1 [Source:RGD Symbol;Acc:1308288]
0.149191	2.46539	0.629373	0.538067	0.999831	-4.6692	ENSRNOG00000020876	Bax	BCL2 associated X, apoptosis regulator [Source:RGD Symbol;Acc:2192]
0.149186	2.23266	0.547149	0.591893	0.999831	-4.6767	ENSRNOG00000005882	Tle1	TLE family member 1, transcriptional corepressor [Source:RGD Symbol;Acc:1309237]
0.148898	3.62154	0.906527	0.378226	0.999831	-4.66815	ENSRNOG00000027264	Dagla	diacylglycerol lipase, alpha [Source:RGD Symbol;Acc:1359461]
0.14884	7.57877	0.575806	0.572828	0.999831	-4.9334	ENSRNOG00000020266	Eef2	eukaryotic translation elongation factor 2 [Source:RGD Symbol;Acc:61979]
0.148756	5.95066	1.58878	0.131846	0.999831	-4.33086	ENSRNOG00000048981	Ahsa1	activator of Hsp90 ATPase activity 1 [Source:RGD Symbol;Acc:1589285]
0.148562	0.387644	0.146275	0.885547	0.999831	-4.6101	ENSRNOG00000054603	Pacsin1	protein kinase C and casein kinase substrate in neurons 1 [Source:RGD Symbol;Acc:3247]
0.148211	5.36284	0.753747	0.462047	0.999831	-4.80244	ENSRNOG00000006004	Phc2	polyhomeotic homolog 2 [Source:RGD Symbol;Acc:1307912]
0.148201	2.07366	0.896508	0.38339	0.999831	-4.62194	ENSRNOG00000022511	Tgap1	GTPase activating protein testicular GAP1 [Source:RGD Symbol;Acc:1359558]
0.148075	4.90166	0.726977	0.477836	0.999831	-4.78705	ENSRNOG00000017871	Sidt2	SID1 transmembrane family, member 2 [Source:RGD Symbol;Acc:1308311]
0.148059	1.45919	0.540106	0.596628	0.999831	-4.63207	ENSRNOG00000005185	Nxph3	neurexophilin 3 [Source:RGD Symbol;Acc:620693]
0.148024	2.90167	0.646214	0.527382	0.999831	-4.65359	ENSRNOG00000016525	Susd3	sushi domain containing 3 [Source:RGD Symbol;Acc:1310933]
0.147949	3.69475	0.550488	0.589656	0.999831	-4.74308	ENSRNOG00000025443	Map1lc3a	microtubule-associated protein 1 light chain 3 alpha [Source:RGD Symbol;Acc:735183]
0.147917	6.09579	1.68709	0.111154	0.999831	-4.25183	ENSRNOG00000008728	Unc79	unc-79 homolog, NALCN channel complex subunit [Source:RGD Symbol;Acc:1311117]
0.147586	2.86645	0.72151	0.481099	0.999831	-4.66764	ENSRNOG00000019351	NA	NA
0.147548	1.34552	0.579037	0.570698	0.999831	-4.62744	ENSRNOG00000001249	Col6a1	collagen type VI alpha 1 chain [Source:RGD Symbol;Acc:1565398]
0.147398	4.55539	1.47463	0.159889	0.999831	-4.42009	ENSRNOG00000017225	Fhip2a	FHF complex subunit HOOK interacting protein 2A [Source:RGD Symbol;Acc:1306116]
0.147324	1.91551	0.478748	0.638652	0.999831	-4.632	ENSRNOG00000025378	Kash5	KASH domain containing 5 [Source:RGD Symbol;Acc:1561972]
0.147295	4.31088	1.43115	0.171798	0.999831	-4.44912	ENSRNOG00000008480	Kcnab3	potassium voltage-gated channel subfamily A regulatory beta subunit 3 [Source:RGD Symbol;Acc:61830]
0.147143	5.24123	0.971847	0.345718	0.999831	-4.70938	ENSRNOG00000017349	Tbc1d10b	TBC1 domain family, member 10b [Source:RGD Symbol;Acc:1309191]
0.147101	3.86872	1.12556	0.2771	0.999831	-4.59687	ENSRNOG00000055236	Gemin4	gem (nuclear organelle) associated protein 4 [Source:RGD Symbol;Acc:1563715]
0.147028	1.60466	0.623602	0.541755	0.999831	-4.67998	ENSRNOG00000011132	LOC100362814	RIKEN cDNA D430041D05 gene [Source:MGI Symbol;Acc:MGI:2181743]
0.146819	3.9721	1.11026	0.283438	0.999831	-4.60739	ENSRNOG00000034007	Nr3c2	nuclear receptor subfamily 3, group C, member 2 [Source:RGD Symbol;Acc:3094]
0.146806	4.74403	0.98537	0.339239	0.999831	-4.68904	ENSRNOG00000017078	Selenon	selenoprotein N [Source:RGD Symbol;Acc:1304574]
0.146581	4.87932	0.651489	0.524061	0.999831	-4.83059	ENSRNOG00000060869	Irak1	interleukin-1 receptor-associated kinase 1 [Source:RGD Symbol;Acc:1563841]
0.146475	6.28276	2.15601	0.046794	0.999831	-3.83797	ENSRNOG00000016628	Scgn	secretagogin, EF-hand calcium binding protein [Source:RGD Symbol;Acc:1303281]
0.146456	2.18894	0.534837	0.600182	0.999831	-4.64898	ENSRNOG00000007582	Zswim4	zinc finger, SWIM-type containing 4 [Source:RGD Symbol;Acc:1308020]
0.146452	3.30966	0.796676	0.437405	0.999831	-4.67509	ENSRNOG00000036649	Pwwp2b	PWWP domain containing 2B [Source:RGD Symbol;Acc:1307108]
0.14639	4.20846	0.996687	0.333883	0.999831	-4.66462	ENSRNOG00000047466	Bdnf	brain-derived neurotrophic factor [Source:RGD Symbol;Acc:2202]
0.14638	4.38643	1.6674	0.115058	0.999831	-4.31262	ENSRNOG00000049203	Pex5	peroxisomal biogenesis factor 5 [Source:RGD Symbol;Acc:1307612]
0.146374	7.17579	0.718649	0.482813	0.999831	-4.8731	ENSRNOG00000018526	Dlg4	discs large MAGUK scaffold protein 4 [Source:RGD Symbol;Acc:68424]
0.14637	6.46947	1.11747	0.280436	0.999831	-4.66332	ENSRNOG00000019193	Stx1b	syntaxin 1B [Source:RGD Symbol;Acc:3784]
0.146294	2.30833	0.585926	0.566172	0.999831	-4.66813	ENSRNOG00000049045	Hkdc1	hexokinase domain containing 1 [Source:RGD Symbol;Acc:2321830]
0.146242	4.72478	1.10805	0.284362	0.999831	-4.62063	ENSRNOG00000012933	Prcc	proline rich mitotic checkpoint control factor [Source:RGD Symbol;Acc:1309037]
0.146193	5.31384	1.15191	0.266429	0.999831	-4.61634	ENSRNOG00000009948	Pip4p1	phosphatidylinositol-4,5-bisphosphate 4-phosphatase 1 [Source:RGD Symbol;Acc:1307475]
0.14615	2.98452	0.803215	0.433725	0.999831	-4.65413	ENSRNOG00000007436	Tedc2	tubulin epsilon and delta complex 2 [Source:RGD Symbol;Acc:2293499]
0.146137	8.41109	3.0327	0.00798295	0.999831	-2.98641	ENSRNOG00000016897	Rlbp1	retinaldehyde binding protein 1 [Source:RGD Symbol;Acc:1309649]
0.146113	3.09194	0.60215	0.555587	0.999831	-4.70047	ENSRNOG00000019511	Mrps18a	mitochondrial ribosomal protein S18A [Source:RGD Symbol;Acc:735229]
0.14593	3.59629	0.609383	0.550902	0.999831	-4.7308	ENSRNOG00000019254	Dyrk1b	dual specificity tyrosine phosphorylation regulated kinase 1B [Source:RGD Symbol;Acc:1307223]
0.145924	2.73803	0.640629	0.530913	0.999831	-4.70209	ENSRNOG00000007329	Frmd6	FERM domain containing 6 [Source:RGD Symbol;Acc:727810]
0.145874	4.96797	0.938037	0.362293	0.999831	-4.71192	ENSRNOG00000012937	Wwp2	WW domain containing E3 ubiquitin protein ligase 2 [Source:RGD Symbol;Acc:1310091]
0.14581	2.31245	0.472702	0.642866	0.999831	-4.65899	ENSRNOG00000019419	Taf6l	TATA-box binding protein associated factor 6 like [Source:RGD Symbol;Acc:1310123]
0.145675	4.6911	0.657637	0.520204	0.999831	-4.77925	ENSRNOG00000002488	Galnt10	polypeptide N-acetylgalactosaminyltransferase 10 [Source:RGD Symbol;Acc:69409]
0.145625	2.82152	0.645063	0.528109	0.999831	-4.77415	ENSRNOG00000010897	Nek6	NIMA-related kinase 6 [Source:RGD Symbol;Acc:727779]
0.145616	6.66241	1.05401	0.307671	0.999831	-4.70438	ENSRNOG00000059683	Mpp2	MAGUK p55 scaffold protein 2 [Source:RGD Symbol;Acc:620014]
0.145547	2.89105	0.476638	0.640121	0.999831	-4.69742	ENSRNOG00000025167	Sema4b	semaphorin 4B [Source:RGD Symbol;Acc:1307872]
0.145253	2.41061	0.649559	0.525275	0.999831	-4.66115	ENSRNOG00000061231	Selenom	selenoprotein M [Source:RGD Symbol;Acc:1565037]
0.145185	2.40765	0.535435	0.599778	0.999831	-4.66943	ENSRNOG00000001623	Zbtb21	zinc finger and BTB domain containing 21 [Source:RGD Symbol;Acc:1310841]
0.145113	3.3856	0.60798	0.551809	0.999831	-4.70126	ENSRNOG00000023152	Tmem201	transmembrane protein 201 [Source:RGD Symbol;Acc:1583947]
0.145087	2.24512	0.930317	0.366154	0.999831	-4.61677	ENSRNOG00000000922	Sumf2	sulfatase modifying factor 2 [Source:RGD Symbol;Acc:1563253]
0.14503	-1.45365	0.0598233	0.953044	0.999831	-4.60125	ENSRNOG00000000476	Zbtb22	zinc finger and BTB domain containing 22 [Source:RGD Symbol;Acc:1359627]
0.145028	0.81886	0.237552	0.815271	0.999831	-4.61863	ENSRNOG00000006539	Pex16	peroxisomal biogenesis factor 16 [Source:RGD Symbol;Acc:1311372]
0.14484	3.8436	1.1827	0.254359	0.999831	-4.57137	ENSRNOG00000022239	Trarg1	trafficking regulator of GLUT4 (SLC2A4) 1 [Source:RGD Symbol;Acc:1307639]
0.144836	3.27375	1.24336	0.231804	0.999831	-4.54451	ENSRNOG00000015357	Bmper	BMP-binding endothelial regulator [Source:RGD Symbol;Acc:1563373]
0.14478	5.22804	1.67908	0.112727	0.999831	-4.2748	ENSRNOG00000000909	Uspl1	ubiquitin specific peptidase like 1 [Source:RGD Symbol;Acc:1310835]
0.144737	1.50764	0.596455	0.55929	0.999831	-4.62433	ENSRNOG00000047401	Gfy	golgi-associated, olfactory signaling regulator [Source:RGD Symbol;Acc:6500406]
0.144712	6.16653	0.751655	0.463269	0.999831	-4.84383	ENSRNOG00000049219	Rnf187	ring finger protein 187 [Source:RGD Symbol;Acc:1308636]
0.14471	2.31599	0.787088	0.442835	0.999831	-4.64589	ENSRNOG00000017577	Bphl	biphenyl hydrolase like [Source:RGD Symbol;Acc:1307572]
0.144646	3.60198	0.774931	0.449782	0.999831	-4.69839	ENSRNOG00000032027	Tmem42	transmembrane protein 42 [Source:RGD Symbol;Acc:1307118]
0.144634	3.82616	1.17371	0.257838	0.999831	-4.58018	ENSRNOG00000029876	Gucy1a2	guanylate cyclase 1 soluble subunit alpha 2 [Source:RGD Symbol;Acc:621655]
0.144566	2.62709	0.578046	0.571351	0.999831	-4.69316	ENSRNOG00000019639	Pgpep1	pyroglutamyl-peptidase I [Source:RGD Symbol;Acc:1303133]
0.144511	6.7196	0.682662	0.504671	0.999831	-4.88316	ENSRNOG00000001351	Trafd1	TRAF type zinc finger domain containing 1 [Source:RGD Symbol;Acc:620171]
0.144379	4.08387	1.83452	0.0854083	0.999831	-4.21546	ENSRNOG00000055499	Grid1	glutamate ionotropic receptor delta type subunit 1 [Source:RGD Symbol;Acc:68366]
0.144353	1.69707	0.841465	0.412597	0.999831	-4.62145	ENSRNOG00000008766	Grin2b	glutamate ionotropic receptor NMDA type subunit 2B [Source:RGD Symbol;Acc:2738]
0.144316	3.02493	1.67236	0.114063	0.999831	-4.36747	ENSRNOG00000016346	Prkcd	protein kinase C, delta [Source:RGD Symbol;Acc:67383]
0.144247	2.60306	0.770867	0.452119	0.999831	-4.66723	ENSRNOG00000025895	Cavin2	caveolae associated protein 2 [Source:RGD Symbol;Acc:1359345]
0.144203	4.5312	0.960527	0.351208	0.999831	-4.68217	ENSRNOG00000016539	Mxd3	Max dimerization protein 3 [Source:RGD Symbol;Acc:628624]
0.1441	0.771871	0.425046	0.676515	0.999831	-4.607	ENSRNOG00000048264	H4f3	H1.3 linker histone, cluster member [Source:RGD Symbol;Acc:1585568]
0.144006	3.28899	0.334821	0.742148	0.999831	-4.718	ENSRNOG00000055579	Tmbim6	transmembrane BAX inhibitor motif containing 6 [Source:RGD Symbol;Acc:3842]
0.143773	1.67432	0.46899	0.645459	0.999831	-4.63431	ENSRNOG00000006394	Tbc1d10a	TBC1 domain family, member 10a [Source:RGD Symbol;Acc:1311641]
0.143771	2.14605	0.713359	0.48599	0.999831	-4.64295	ENSRNOG00000024170	Phf5a	PHD finger protein 5A [Source:RGD Symbol;Acc:621555]
0.143649	4.72415	1.85507	0.0822737	0.999831	-4.16075	ENSRNOG00000007331	Rragd	Ras-related GTP binding D [Source:RGD Symbol;Acc:1310007]
0.143588	6.99908	1.03281	0.317187	0.999831	-4.72327	ENSRNOG00000010488	Zmiz1	zinc finger, MIZ-type containing 1 [Source:RGD Symbol;Acc:1311620]
0.143541	3.57957	0.63481	0.534605	0.999831	-4.70248	ENSRNOG00000049733	Ankrd33	ankyrin repeat domain 33 [Source:RGD Symbol;Acc:1586880]
0.143541	3.77362	1.48679	0.156681	0.999831	-4.42787	ENSRNOG00000053753	Thsd4	thrombospondin type 1 domain containing 4 [Source:RGD Symbol;Acc:1566296]
0.143446	4.55005	0.753264	0.462329	0.999831	-4.75062	ENSRNOG00000057078	Ddit4	DNA-damage-inducible transcript 4 [Source:RGD Symbol;Acc:621731]
0.143229	3.39677	0.862318	0.401365	0.999831	-4.66774	ENSRNOG00000007147	Cyp46a1	cytochrome P450, family 46, subfamily a, polypeptide 1 [Source:RGD Symbol;Acc:1306605]
0.143215	7.03404	2.17912	0.044757	0.999831	-3.81035	ENSRNOG00000012146	Pomt2	protein-O-mannosyltransferase 2 [Source:RGD Symbol;Acc:1586427]
0.143129	2.8172	0.62897	0.538324	0.999831	-4.667	ENSRNOG00000007628	Ptp4a3	protein tyrosine phosphatase 4A3 [Source:RGD Symbol;Acc:1308687]
0.142957	4.74732	0.742343	0.468733	0.999831	-4.78154	ENSRNOG00000009495	Src	SRC proto-oncogene, non-receptor tyrosine kinase [Source:RGD Symbol;Acc:620795]
0.14292	4.78929	0.884481	0.38965	0.999831	-4.729	ENSRNOG00000057620	Slc6a8	solute carrier family 6 member 8 [Source:RGD Symbol;Acc:619711]
0.142887	4.54686	0.57734	0.571816	0.999831	-4.83601	ENSRNOG00000004139	Ndel1	nudE neurodevelopment protein 1-like 1 [Source:RGD Symbol;Acc:621235]
0.142857	2.58667	0.674746	0.509556	0.999831	-4.65966	ENSRNOG00000036695	Mrpl12	mitochondrial ribosomal protein L12 [Source:RGD Symbol;Acc:1588559]
0.142655	3.58926	1.17023	0.259193	0.999831	-4.57679	ENSRNOG00000017550	Fbln7	fibulin 7 [Source:RGD Symbol;Acc:1310131]
0.142654	3.92752	0.780638	0.446512	0.999831	-4.72362	ENSRNOG00000000816	NA	NA
0.14264	3.51956	1.04246	0.312832	0.999831	-4.61665	ENSRNOG00000017836	Rrp36	ribosomal RNA processing 36 [Source:RGD Symbol;Acc:2321693]
0.142623	4.50337	0.703215	0.492118	0.999831	-4.7757	ENSRNOG00000030157	Dhx16	DEAH-box helicase 16 [Source:RGD Symbol;Acc:1302963]
0.142614	4.27301	1.02841	0.31919	0.999831	-4.64498	ENSRNOG00000047171	Rnf8	ring finger protein 8 [Source:RGD Symbol;Acc:1308035]
0.142605	5.12003	0.453358	0.656433	0.999831	-4.87817	ENSRNOG00000053943	Cops3	COP9 signalosome subunit 3 [Source:RGD Symbol;Acc:1303002]
0.142598	1.6112	0.597197	0.558807	0.999831	-4.63024	ENSRNOG00000016708	E2f1	E2F transcription factor 1 [Source:RGD Symbol;Acc:728892]
0.14258	2.60335	0.520598	0.609839	0.999831	-4.67901	ENSRNOG00000021773	Bop1	BOP1 ribosomal biogenesis factor [Source:RGD Symbol;Acc:1310589]
0.142514	2.5549	0.479485	0.638139	0.999831	-4.67627	ENSRNOG00000018997	Myh7b	myosin heavy chain 7B [Source:RGD Symbol;Acc:1307994]
0.142352	2.73637	1.34792	0.196624	0.999831	-4.51917	ENSRNOG00000048824	Rnf165	ring finger protein 165 [Source:RGD Symbol;Acc:1560744]
0.142264	2.34827	0.672484	0.510956	0.999831	-4.6515	ENSRNOG00000013647	Polm	DNA polymerase mu [Source:RGD Symbol;Acc:1308247]
0.142259	4.30967	0.877382	0.393378	0.999831	-4.69927	ENSRNOG00000013712	Tex261	testis expressed 261 [Source:RGD Symbol;Acc:1305851]
0.142171	4.96016	0.983352	0.3402	0.999831	-4.69102	ENSRNOG00000014621	Rab8a	RAB8A, member RAS oncogene family [Source:RGD Symbol;Acc:621144]
0.142155	1.63881	0.763336	0.45647	0.999831	-4.63384	ENSRNOG00000058586	Tyro3	TYRO3 protein tyrosine kinase [Source:RGD Symbol;Acc:3923]
0.142147	4.92148	1.21223	0.243175	0.999831	-4.57292	ENSRNOG00000006593	Grpel1	GrpE-like 1, mitochondrial [Source:RGD Symbol;Acc:70947]
0.141956	2.11266	0.327333	0.747697	0.999831	-4.64794	ENSRNOG00000003108	Acbd4	acyl-CoA binding domain containing 4 [Source:RGD Symbol;Acc:1308404]
0.141865	2.20833	0.924391	0.369136	0.999831	-4.62693	ENSRNOG00000019305	Sh3tc2	SH3 domain and tetratricopeptide repeats 2 [Source:RGD Symbol;Acc:1309038]
0.141817	1.50161	0.48619	0.633482	0.999831	-4.63337	ENSRNOG00000012534	Mfsd10	major facilitator superfamily domain containing 10 [Source:RGD Symbol;Acc:1311900]
0.141808	4.72594	0.733803	0.473779	0.999831	-4.78011	ENSRNOG00000010474	Hmces	5-hydroxymethylcytosine binding, ES cell specific [Source:RGD Symbol;Acc:1559800]
0.141687	5.67175	1.19038	0.251413	0.999831	-4.60282	ENSRNOG00000008943	Penk	proenkephalin [Source:RGD Symbol;Acc:68946]
0.141682	3.62346	1.37215	0.189117	0.999831	-4.49262	ENSRNOG00000022155	C4h3orf20	similar to human chromosome 3 open reading frame 20 [Source:RGD Symbol;Acc:1560289]
0.141622	2.14603	0.623507	0.541816	0.999831	-4.66288	ENSRNOG00000007528	Kcnh7	potassium voltage-gated channel subfamily H member 7 [Source:RGD Symbol;Acc:621112]
0.141562	4.80312	0.888961	0.38731	0.999831	-4.71904	ENSRNOG00000017824	Ncoa5	nuclear receptor coactivator 5 [Source:RGD Symbol;Acc:1307702]
0.141519	1.9461	0.314302	0.757389	0.999831	-4.65447	ENSRNOG00000025757	Myh6	myosin heavy chain 6 [Source:RGD Symbol;Acc:62029]
0.141488	4.02545	0.7455	0.466877	0.999831	-4.73266	ENSRNOG00000018232	Srf	serum response factor [Source:RGD Symbol;Acc:1559787]
0.141434	4.68692	1.77625	0.0948789	0.999831	-4.23085	ENSRNOG00000022455	Cptp	ceramide-1-phosphate transfer protein [Source:RGD Symbol;Acc:1359656]
0.141418	3.42882	0.509717	0.61727	0.999831	-4.7052	ENSRNOG00000053893	Opn4	opsin 4 [Source:RGD Symbol;Acc:621701]
0.141316	2.04656	0.7743	0.450144	0.999831	-4.62951	ENSRNOG00000005633	Zbtb49	zinc finger and BTB domain containing 49 [Source:RGD Symbol;Acc:1306733]
0.141315	7.37334	1.35525	0.194329	0.999831	-4.50839	ENSRNOG00000003365	Cadm3	cell adhesion molecule 3 [Source:RGD Symbol;Acc:1307035]
0.141272	4.60427	0.507527	0.61877	0.999831	-4.80997	ENSRNOG00000001700	Whrn	whirlin [Source:RGD Symbol;Acc:631330]
0.141242	3.51062	1.07177	0.299862	0.999831	-4.62376	ENSRNOG00000046414	NA	NA
0.141215	4.39944	1.13654	0.272613	0.999831	-4.60342	ENSRNOG00000056009	Rab11fip5	RAB11 family interacting protein 5 [Source:RGD Symbol;Acc:1592069]
0.141162	8.32001	2.26589	0.0378187	0.999831	-3.72548	ENSRNOG00000016928	Cplx4	complexin 4 [Source:RGD Symbol;Acc:1307643]
0.140837	2.57746	1.09204	0.291128	0.999831	-4.58958	ENSRNOG00000015340	Dnajc25	DnaJ heat shock protein family (Hsp40) member C25 [Source:RGD Symbol;Acc:1561488]
0.140829	2.27679	0.64301	0.529406	0.999831	-4.64859	ENSRNOG00000001554	RGD1563888	similar to DNA segment, Chr 16, ERATO Doi 472, expressed [Source:RGD Symbol;Acc:1563888]
0.140754	1.50597	0.615483	0.546968	0.999831	-4.62673	ENSRNOG00000042086	Rab26	RAB26, member RAS oncogene family [Source:RGD Symbol;Acc:620890]
0.140685	4.94732	0.26135	0.797186	0.999831	-4.81676	ENSRNOG00000014179	Rps2	ribosomal protein S2 [Source:RGD Symbol;Acc:619887]
0.1406	3.02501	0.74049	0.469825	0.999831	-4.68093	ENSRNOG00000049758	Tbc1d16	TBC1 domain family, member 16 [Source:RGD Symbol;Acc:1588560]
0.14039	5.25346	1.09688	0.289071	0.999831	-4.64847	ENSRNOG00000003562	Susd4	sushi domain containing 4 [Source:RGD Symbol;Acc:1564043]
0.140183	4.49125	0.995695	0.33435	0.999831	-4.68052	ENSRNOG00000049962	NA	NA
0.140106	2.28098	0.993165	0.335543	0.999831	-4.60883	ENSRNOG00000018838	Paox	polyamine oxidase [Source:RGD Symbol;Acc:1561125]
0.140037	1.73168	0.377842	0.710558	0.999831	-4.65169	ENSRNOG00000020587	Efemp2	EGF containing fibulin extracellular matrix protein 2 [Source:RGD Symbol;Acc:1359496]
0.140018	4.84768	0.940019	0.361307	0.999831	-4.71257	ENSRNOG00000004805	Stac2	SH3 and cysteine rich domain 2 [Source:RGD Symbol;Acc:1305548]
0.139988	5.83467	0.513472	0.614701	0.999831	-4.9092	ENSRNOG00000025053	Lrp1	LDL receptor related protein 1 [Source:RGD Symbol;Acc:1307535]
0.139849	2.36667	1.09909	0.288134	0.999831	-4.58699	ENSRNOG00000002539	Prm2	protamine 2 [Source:RGD Symbol;Acc:3409]
0.139832	3.76017	1.12169	0.278693	0.999831	-4.59886	ENSRNOG00000003288	Cacng5	calcium voltage-gated channel auxiliary subunit gamma 5 [Source:RGD Symbol;Acc:628805]
0.139761	3.54569	0.603823	0.554501	0.999831	-4.73139	ENSRNOG00000003398	Tomm40l	translocase of outer mitochondrial membrane 40 like [Source:RGD Symbol;Acc:1562006]
0.139745	7.02609	0.97107	0.346093	0.999831	-4.75937	ENSRNOG00000047692	Hells	helicase, lymphoid specific [Source:RGD Symbol;Acc:1309820]
0.139607	5.29485	1.01273	0.326393	0.999831	-4.69417	ENSRNOG00000016156	Nptxr	neuronal pentraxin receptor [Source:RGD Symbol;Acc:628898]
0.139563	5.7744	0.449646	0.659051	0.999831	-4.8987	ENSRNOG00000018387	Wdr7	WD repeat domain 7 [Source:RGD Symbol;Acc:619836]
0.139503	2.6267	1.37952	0.186877	0.999831	-4.50077	ENSRNOG00000020705	Rnls	renalase, FAD-dependent amine oxidase [Source:RGD Symbol;Acc:1309804]
0.13945	2.47467	0.57552	0.573017	0.999831	-4.69005	ENSRNOG00000000635	Arid5b	AT-rich interaction domain 5B [Source:RGD Symbol;Acc:1311735]
0.139358	6.23061	1.29003	0.215536	0.999831	-4.54652	ENSRNOG00000020433	Actn4	actinin alpha 4 [Source:RGD Symbol;Acc:61816]
0.139343	3.48329	1.94454	0.0697868	0.999831	-4.19338	ENSRNOG00000047473	LOC100909434	protocadherin-16-like [Source:RGD Symbol;Acc:6503563]
0.139327	5.06494	0.749322	0.464635	0.999831	-4.77685	ENSRNOG00000019553	Ipo4	importin 4 [Source:RGD Symbol;Acc:1305206]
[truncated: 8,727 more rows]

## Sheet: female only
logFC	AveExpr	t	P.Value	adj.P.Val	B	ENSEMBL	name	description
-1.57852	5.37744	-8.17622	4.44703e-07	0.00476988	6.69897	ENSRNOG00000053272	Chi3l1	chitinase 3 like 1 [Source:RGD Symbol;Acc:620874]
-1.31973	5.1168	-7.64405	1.05411e-06	0.00565321	5.83966	ENSRNOG00000050469	Gng11	G protein subunit gamma 11 [Source:RGD Symbol;Acc:621515]
3.17532	4.47626	6.5406	7.10727e-06	0.00577317	3.63941	ENSRNOG00000031706	RGD1563601	similar to Tpi1 protein [Source:RGD Symbol;Acc:1563601]
2.59895	4.20218	4.27136	0.000595495	0.00577317	-0.109127	ENSRNOG00000015447	Calcoco1	calcium binding and coiled coil domain 1 [Source:RGD Symbol;Acc:619812]
2.31126	6.50382	4.38538	0.000470203	0.00577317	0.0340267	ENSRNOG00000033262	Reep6	receptor accessory protein 6 [Source:RGD Symbol;Acc:1309508]
2.30044	3.71109	4.74538	0.000224696	0.00577317	0.701427	ENSRNOG00000046502	Lonp1	lon peptidase 1, mitochondrial [Source:RGD Symbol;Acc:621598]
2.26407	5.24789	5.34727	6.74213e-05	0.00577317	1.89987	ENSRNOG00000023210	Trappc10	trafficking protein particle complex subunit 10 [Source:RGD Symbol;Acc:1311263]
2.25929	3.96913	4.66353	0.000265482	0.00577317	0.622212	ENSRNOG00000002636	Abat	4-aminobutyrate aminotransferase [Source:RGD Symbol;Acc:620948]
2.24423	2.51697	4.2265	0.000653664	0.00577317	-0.412886	ENSRNOG00000016177	Scara3	scavenger receptor class A, member 3 [Source:RGD Symbol;Acc:1309269]
2.2296	2.021	4.77545	0.000211376	0.00577317	0.242489	ENSRNOG00000026527	Snx32	sorting nexin 32 [Source:RGD Symbol;Acc:1560591]
2.22954	4.78655	5.73072	3.20487e-05	0.00577317	2.56403	ENSRNOG00000019506	Dnajb2	DnaJ heat shock protein family (Hsp40) member B2 [Source:RGD Symbol;Acc:1591035]
2.19012	1.50165	4.57035	0.000321259	0.00577317	-1.33399	ENSRNOG00000059381	Mrps6	mitochondrial ribosomal protein S6 [Source:RGD Symbol;Acc:2322928]
2.13723	5.80676	4.4932	0.000376438	0.00577317	0.230548	ENSRNOG00000052020	NA	NA
2.09795	4.02663	4.30725	0.000552759	0.00577317	-0.0584684	ENSRNOG00000021051	Cyth2	cytohesin 2 [Source:RGD Symbol;Acc:620398]
2.09314	2.84299	4.45546	0.00040687	0.00577317	0.181505	ENSRNOG00000019689	Vwf	von Willebrand factor [Source:RGD Symbol;Acc:621759]
2.09144	3.97573	4.3179	0.000540683	0.00577317	-0.0226707	ENSRNOG00000001173	Cabp1	calcium binding protein 1 [Source:RGD Symbol;Acc:620385]
2.0808	4.92335	4.30718	0.000552838	0.00577317	-0.0760773	ENSRNOG00000008431	Gabbr2	gamma-aminobutyric acid type B receptor subunit 2 [Source:RGD Symbol;Acc:619864]
2.07361	2.82244	4.70966	0.000241641	0.00577317	0.269152	ENSRNOG00000046333	AABR07007032.1	actin-binding LIM protein 1 [Source:RGD Symbol;Acc:1565768]
2.06477	3.72934	4.80432	0.000199351	0.00577317	0.796373	ENSRNOG00000005447	Ypel2	yippee-like 2 [Source:RGD Symbol;Acc:1311564]
2.06385	4.23194	4.35969	0.000495861	0.00577317	0.0472383	ENSRNOG00000014429	Arfgap2	ADP-ribosylation factor GTPase activating protein 2 [Source:RGD Symbol;Acc:1306177]
2.06202	5.7744	4.75855	0.00021876	0.00577317	0.748638	ENSRNOG00000018387	Wdr7	WD repeat domain 7 [Source:RGD Symbol;Acc:619836]
2.06182	6.42306	4.42762	0.000430915	0.00577317	0.0883533	ENSRNOG00000014616	Iars1	isoleucyl-tRNA synthetase 1 [Source:RGD Symbol;Acc:621022]
2.0539	2.10457	4.51612	0.000359104	0.00577317	0.0844262	ENSRNOG00000024352	Tyw1	tRNA-yW synthesizing protein 1 homolog [Source:RGD Symbol;Acc:1310420]
2.03825	3.57416	4.43215	0.000426905	0.00577317	0.185908	ENSRNOG00000056756	Actn1	actinin, alpha 1 [Source:RGD Symbol;Acc:70907]
2.0292	8.81556	4.50186	0.000369791	0.00577317	0.165321	ENSRNOG00000048682	Zwint	ZW10 interacting kinetochore protein [Source:RGD Symbol;Acc:628671]
2.01248	4.93985	4.29414	0.00056799	0.00577317	-0.114857	ENSRNOG00000009329	Nr1d1	nuclear receptor subfamily 1, group D, member 1 [Source:RGD Symbol;Acc:628827]
1.99242	4.94838	4.68107	0.000256146	0.00577317	0.637354	ENSRNOG00000012852	Bin1	bridging integrator 1 [Source:RGD Symbol;Acc:621786]
1.96254	7.68441	5.79752	2.82098e-05	0.00577317	2.68199	ENSRNOG00000030963	LOC108351137	glyceraldehyde-3-phosphate dehydrogenase [Source:RGD Symbol;Acc:11369796]
1.95166	5.90635	4.47688	0.000389302	0.00577317	0.211068	ENSRNOG00000013533	Acin1	apoptotic chromatin condensation inducer 1 [Source:RGD Symbol;Acc:1311945]
1.94564	3.75231	4.63977	0.000278687	0.00577317	0.575615	ENSRNOG00000039350	Gng13	G protein subunit gamma 13 [Source:RGD Symbol;Acc:1593806]
1.93096	6.36122	4.46174	0.000401632	0.00577317	0.146095	ENSRNOG00000016991	Arl2bp	ADP-ribosylation factor like GTPase 2 binding protein [Source:RGD Symbol;Acc:1561471]
1.8675	4.13096	4.32754	0.000529997	0.00577317	-0.0068288	ENSRNOG00000017753	Ercc2	ERCC excision repair 2, TFIIH core complex helicase subunit [Source:RGD Symbol;Acc:1309109]
1.85546	3.28394	4.22663	0.000653483	0.00577317	-0.240155	ENSRNOG00000049862	Rnf157	ring finger protein 157 [Source:RGD Symbol;Acc:1591154]
1.85399	4.04823	4.42807	0.000430516	0.00577317	0.183049	ENSRNOG00000012357	Unc45a	unc-45 myosin chaperone A [Source:RGD Symbol;Acc:1305357]
1.84223	6.1975	4.31203	0.000547312	0.00577317	-0.14979	ENSRNOG00000036833	Zfp385a	zinc finger protein 385A [Source:RGD Symbol;Acc:1593784]
1.83909	5.60488	4.74333	0.000225636	0.00577317	0.717855	ENSRNOG00000012477	NA	NA
1.83413	5.13781	4.42544	0.000432862	0.00577317	0.118048	ENSRNOG00000017431	RGD1304884	similar to RIKEN cDNA 6430548M08 [Source:RGD Symbol;Acc:1304884]
1.82938	3.00925	4.72977	0.000231949	0.00577317	0.752223	ENSRNOG00000017210	Slc22a23	solute carrier family 22, member 23 [Source:RGD Symbol;Acc:620302]
1.82316	4.30887	4.55615	0.000330753	0.00577317	0.421541	ENSRNOG00000058006	Sncg	synuclein, gamma [Source:RGD Symbol;Acc:70996]
1.81988	6.69067	5.35163	6.68476e-05	0.00577317	1.86892	ENSRNOG00000054770	Rdh11	retinol dehydrogenase 11 [Source:RGD Symbol;Acc:1312001]
1.80807	3.67642	5.58695	4.22614e-05	0.00577317	2.22211	ENSRNOG00000001113	Mmd2	monocyte to macrophage differentiation-associated 2 [Source:RGD Symbol;Acc:1306506]
1.80705	11.5178	5.66461	3.63837e-05	0.00577317	2.44722	ENSRNOG00000017589	Gnat1	G protein subunit alpha transducin 1 [Source:RGD Symbol;Acc:1304683]
1.79721	3.75263	5.27009	7.84874e-05	0.00577317	1.67474	ENSRNOG00000046227	Tprg1l	tumor protein p63 regulated 1-like [Source:RGD Symbol;Acc:1590079]
1.78797	4.634	6.23201	1.2484e-05	0.00577317	3.44251	ENSRNOG00000019649	Cul4a	cullin 4A [Source:RGD Symbol;Acc:1563853]
1.78032	3.63991	4.35531	0.000500379	0.00577317	-0.0210318	ENSRNOG00000011384	Aimp1	aminoacyl tRNA synthetase complex-interacting multifunctional protein 1 [Source:RGD Symbol;Acc:620466]
1.77712	5.1693	4.28242	0.000581979	0.00577317	-0.149747	ENSRNOG00000047737	NA	NA
1.76693	4.87733	4.34191	0.000514454	0.00577317	0.00229453	ENSRNOG00000021101	Sema6c	semaphorin 6C [Source:RGD Symbol;Acc:3659]
1.76476	7.57877	4.93649	0.000152633	0.00577317	1.02649	ENSRNOG00000020266	Eef2	eukaryotic translation elongation factor 2 [Source:RGD Symbol;Acc:61979]
1.7625	5.83467	4.59812	0.000303486	0.00577317	0.409907	ENSRNOG00000025053	Lrp1	LDL receptor related protein 1 [Source:RGD Symbol;Acc:1307535]
1.75513	5.0401	4.65016	0.000272832	0.00577317	0.583441	ENSRNOG00000012046	Prmt5	protein arginine methyltransferase 5 [Source:RGD Symbol;Acc:1309053]
1.75066	5.30943	4.50234	0.000369426	0.00577317	0.270516	ENSRNOG00000001214	Pfkl	phosphofructokinase, liver type [Source:RGD Symbol;Acc:3311]
1.74755	2.9826	4.81294	0.000195897	0.00577317	0.677682	ENSRNOG00000037871	Sfxn5	sideroflexin 5 [Source:RGD Symbol;Acc:628706]
1.74292	3.81981	4.52869	0.000349944	0.00577317	0.374034	ENSRNOG00000016255	Podxl2	podocalyxin-like 2 [Source:RGD Symbol;Acc:1305815]
1.72613	4.35866	4.82676	0.000190491	0.00577317	0.933965	ENSRNOG00000012121	Sdf2	stromal cell derived factor 2 [Source:RGD Symbol;Acc:1307274]
1.71636	3.44642	4.26843	0.000599125	0.00577317	-0.147125	ENSRNOG00000027569	Trappc9	trafficking protein particle complex subunit 9 [Source:RGD Symbol;Acc:1309461]
1.71313	3.45588	4.35037	0.000505514	0.00577317	0.0127832	ENSRNOG00000003149	Farsa	phenylalanyl-tRNA synthetase subunit alpha [Source:RGD Symbol;Acc:1310314]
1.70004	6.40279	4.51396	0.000360701	0.00577317	0.252419	ENSRNOG00000015402	Guca1a	guanylate cyclase activator 1A [Source:RGD Symbol;Acc:1308712]
1.69958	4.75993	4.4306	0.000428274	0.00577317	0.155772	ENSRNOG00000000527	Mtch1	mitochondrial carrier 1 [Source:RGD Symbol;Acc:1309262]
1.68637	3.08711	4.26468	0.000603813	0.00577317	-0.193722	ENSRNOG00000020067	Rab40c	Rab40c, member RAS oncogene family [Source:RGD Symbol;Acc:727914]
1.68012	4.72903	4.85722	0.000179102	0.00577317	0.975485	ENSRNOG00000016143	Gpr162	G protein-coupled receptor 162 [Source:RGD Symbol;Acc:1307437]
1.67501	6.87968	6.21744	1.28247e-05	0.00577317	3.45784	ENSRNOG00000037483	Ep400	E1A binding protein p400 [Source:RGD Symbol;Acc:1304733]
1.66668	4.72512	4.48169	0.000385464	0.00577317	0.255616	ENSRNOG00000020703	Sipa1l3	signal-induced proliferation-associated 1 like 3 [Source:RGD Symbol;Acc:1311432]
1.6539	2.66408	4.84809	0.000182442	0.00577317	0.713043	ENSRNOG00000020217	NA	NA
1.6457	4.16612	4.21006	0.000676395	0.00577317	-0.226421	ENSRNOG00000000990	Pdap1	PDGFA associated protein 1 [Source:RGD Symbol;Acc:620442]
1.61906	6.00423	4.67774	0.000257894	0.00577317	0.564262	ENSRNOG00000002369	Rgs8	regulator of G-protein signaling 8 [Source:RGD Symbol;Acc:3571]
1.61293	8.40967	4.67254	0.000260643	0.00577317	0.497703	ENSRNOG00000052802	Aldoa	aldolase, fructose-bisphosphate A [Source:RGD Symbol;Acc:2089]
1.59948	3.33397	4.26467	0.000603825	0.00577317	-0.140157	ENSRNOG00000003542	Hcfc1r1	host cell factor C1 regulator 1 [Source:RGD Symbol;Acc:727975]
1.59517	4.42945	4.53104	0.00034826	0.00577317	0.363891	ENSRNOG00000049056	AABR07051450.1	adenylate kinase 1 [Source:RGD Symbol;Acc:2076]
1.58267	3.87079	4.83984	0.000185512	0.00577317	0.940773	ENSRNOG00000018998	Yipf3	Yip1 domain family, member 3 [Source:RGD Symbol;Acc:1308185]
1.57887	4.61462	5.03	0.000126506	0.00577317	1.31323	ENSRNOG00000012084	Xpnpep1	X-prolyl aminopeptidase 1 [Source:RGD Symbol;Acc:621274]
1.57438	3.93407	4.4148	0.000442469	0.00577317	0.158058	ENSRNOG00000004172	Pdk2	pyruvate dehydrogenase kinase 2 [Source:RGD Symbol;Acc:69428]
1.57068	4.97896	4.57403	0.000318845	0.00577317	0.426273	ENSRNOG00000021871	Gcn1	GCN1 activator of EIF2AK4 [Source:RGD Symbol;Acc:1593434]
1.57054	3.55193	4.24023	0.000635268	0.00577317	-0.183801	ENSRNOG00000004280	Tcn2	transcobalamin 2 [Source:RGD Symbol;Acc:620681]
1.56851	4.6423	4.37998	0.000475482	0.00577317	0.057171	ENSRNOG00000007387	Per1	period circadian regulator 1 [Source:RGD Symbol;Acc:727863]
1.56087	4.27911	4.54179	0.000340651	0.00577317	0.394495	ENSRNOG00000049785	Ranbp3	RAN binding protein 3 [Source:RGD Symbol;Acc:1589604]
1.55208	8.01491	4.42421	0.000433961	0.00577317	0.00485955	ENSRNOG00000019858	Rom1	retinal outer segment membrane protein 1 [Source:RGD Symbol;Acc:1306070]
1.54982	6.2677	4.20422	0.00068467	0.00577317	-0.375959	ENSRNOG00000019930	Rhot2	ras homolog family member T2 [Source:RGD Symbol;Acc:727970]
1.54933	3.98562	4.33798	0.000518657	0.00577317	0.0142789	ENSRNOG00000018457	Ptpa	protein phosphatase 2 phosphatase activator [Source:RGD Symbol;Acc:1308354]
1.54492	5.1541	4.29957	0.00056163	0.00577317	-0.125899	ENSRNOG00000016849	Ppp2r5d	protein phosphatase 2, regulatory subunit B', delta [Source:RGD Symbol;Acc:1306666]
1.53856	4.9424	4.5306	0.00034857	0.00577317	0.325245	ENSRNOG00000016388	Sphkap	SPHK1 interactor, AKAP domain containing [Source:RGD Symbol;Acc:1311951]
1.53727	4.19529	4.30706	0.000552973	0.00577317	-0.055032	ENSRNOG00000011427	Hr	HR, lysine demethylase and nuclear receptor corepressor [Source:RGD Symbol;Acc:620634]
1.53452	3.69836	4.26294	0.000605988	0.00577317	-0.126215	ENSRNOG00000019985	Asic4	acid sensing ion channel subunit family member 4 [Source:RGD Symbol;Acc:621068]
1.53152	3.66559	4.44006	0.000419993	0.00577317	0.202389	ENSRNOG00000013794	Rbp1	retinol binding protein 1 [Source:RGD Symbol;Acc:3543]
1.53104	4.45106	4.38455	0.000471007	0.00577317	0.0864621	ENSRNOG00000018795	Rpl18a	ribosomal protein L18A [Source:RGD Symbol;Acc:1302976]
1.52142	5.50938	4.88498	0.000169332	0.00577317	1.01305	ENSRNOG00000009845	Acadm	acyl-CoA dehydrogenase medium chain [Source:RGD Symbol;Acc:2012]
1.52129	3.04608	4.67071	0.00026162	0.00577317	0.51172	ENSRNOG00000003504	Thsd8	thrombospondin type 1 domain containing 8 [Source:RGD Symbol;Acc:41288257]
1.5205	3.0575	4.28105	0.000583634	0.00577317	-0.186199	ENSRNOG00000015736	Dhrs3	dehydrogenase/reductase 3 [Source:RGD Symbol;Acc:1305584]
1.51704	5.06949	4.45346	0.00040855	0.00577317	0.164951	ENSRNOG00000006824	Hdac11	histone deacetylase 11 [Source:RGD Symbol;Acc:1311706]
1.50412	3.18733	4.28985	0.000573075	0.00577317	-0.0961235	ENSRNOG00000021137	Kctd15	potassium channel tetramerization domain containing 15 [Source:RGD Symbol;Acc:1583737]
1.49763	5.08636	5.55647	4.48295e-05	0.00577317	2.28375	ENSRNOG00000001216	Trpm2	transient receptor potential cation channel, subfamily M, member 2 [Source:RGD Symbol;Acc:1311889]
1.49139	3.56106	4.56242	0.000326529	0.00577317	0.434304	ENSRNOG00000016372	Slc12a7	solute carrier family 12 member 7 [Source:RGD Symbol;Acc:1359672]
1.48956	4.22604	4.52795	0.000350479	0.00577317	0.36263	ENSRNOG00000015430	Nlgn2	neuroligin 2 [Source:RGD Symbol;Acc:621118]
1.4854	4.36479	4.23561	0.000641395	0.00577317	-0.197567	ENSRNOG00000011927	Sdc3	syndecan 3 [Source:RGD Symbol;Acc:621486]
1.48473	4.42453	4.86313	0.000176977	0.00577317	0.995463	ENSRNOG00000008831	Hcn2	hyperpolarization activated cyclic nucleotide gated potassium and sodium channel 2 [Source:RGD Symbol;Acc:620689]
1.4836	4.76226	5.12917	0.00010378	0.00577317	1.49356	ENSRNOG00000011541	Cygb	cytoglobin [Source:RGD Symbol;Acc:69415]
1.4815	3.90657	5.55094	4.53118e-05	0.00577317	2.20785	ENSRNOG00000017241	Dpcd	deleted in primary ciliary dyskinesia [Source:RGD Symbol;Acc:1307648]
1.48128	8.51042	4.6964	0.000248263	0.00577317	0.545866	ENSRNOG00000020263	Atp1a3	ATPase Na+/K+ transporting subunit alpha 3 [Source:RGD Symbol;Acc:2169]
1.47756	4.87988	5.6538	3.71483e-05	0.00577317	2.45866	ENSRNOG00000009039	Trappc12	trafficking protein particle complex subunit 12 [Source:RGD Symbol;Acc:1566054]
1.46679	5.94585	4.24685	0.000626586	0.00577317	-0.281251	ENSRNOG00000025459	Mars1	methionyl-tRNA synthetase 1 [Source:RGD Symbol;Acc:1305321]
1.46659	9.42443	4.30359	0.000556967	0.00577317	-0.233027	ENSRNOG00000018630	LOC108351137	glyceraldehyde-3-phosphate dehydrogenase [Source:RGD Symbol;Acc:11369796]
1.46482	2.96345	4.69401	0.000249475	0.00577317	0.638891	ENSRNOG00000008837	Ass1	argininosuccinate synthase 1 [Source:RGD Symbol;Acc:2163]
1.45962	4.97891	4.64432	0.000276109	0.00577317	0.57551	ENSRNOG00000050410	Snrpd3	small nuclear ribonucleoprotein D3 polypeptide [Source:RGD Symbol;Acc:1597573]
1.45129	8.55985	4.84993	0.000181763	0.00577317	0.851954	ENSRNOG00000011452	Aldoc	aldolase, fructose-bisphosphate C [Source:RGD Symbol;Acc:2091]
1.45047	3.8331	4.44482	0.000415889	0.00577317	0.216218	ENSRNOG00000046283	Tmem41a	transmembrane protein 41a [Source:RGD Symbol;Acc:1591692]
1.44809	4.53573	4.70424	0.000244328	0.00577317	0.69457	ENSRNOG00000022896	Rrp7a	ribosomal RNA processing 7 homolog A [Source:RGD Symbol;Acc:1311547]
1.44759	5.20854	4.26745	0.000600349	0.00577317	-0.194108	ENSRNOG00000017418	Rps3	ribosomal protein S3 [Source:RGD Symbol;Acc:619888]
1.44581	3.50708	4.391	0.000464774	0.00577317	0.114187	ENSRNOG00000014152	Kcnip3	potassium voltage-gated channel interacting protein 3 [Source:RGD Symbol;Acc:70888]
1.44409	4.80619	4.64862	0.000273695	0.00577317	0.572788	ENSRNOG00000058909	Rps9	ribosomal protein S9 [Source:RGD Symbol;Acc:619889]
1.44187	3.69868	4.21234	0.000673203	0.00577317	-0.227016	ENSRNOG00000011026	Irf2bpl	interferon regulatory factor 2 binding protein-like [Source:RGD Symbol;Acc:1310994]
1.44051	4.18691	4.40702	0.000449636	0.00577317	0.134931	ENSRNOG00000042915	Mxra7	matrix remodeling associated 7 [Source:RGD Symbol;Acc:1594666]
1.42857	6.24911	4.3513	0.000504549	0.00577317	-0.105097	ENSRNOG00000018823	Nisch	nischarin [Source:RGD Symbol;Acc:1306950]
1.42801	5.98676	4.21101	0.000675071	0.00577317	-0.353863	ENSRNOG00000008471	Kif21b	kinesin family member 21B [Source:RGD Symbol;Acc:1306206]
1.42768	4.3592	4.33858	0.000518012	0.00577317	0.00237584	ENSRNOG00000020249	P4htm	prolyl 4-hydroxylase, transmembrane [Source:RGD Symbol;Acc:1311848]
1.4272	2.7815	4.99488	0.000135731	0.00577317	0.923895	ENSRNOG00000000466	Hsd17b8	hydroxysteroid (17-beta) dehydrogenase 8 [Source:RGD Symbol;Acc:1303158]
1.42292	4.70664	4.53998	0.000341922	0.00577317	0.368728	ENSRNOG00000017905	Map1lc3b	microtubule-associated protein 1 light chain 3 beta [Source:RGD Symbol;Acc:621315]
1.42077	6.00972	4.59706	0.000304146	0.00577317	0.403855	ENSRNOG00000005130	Ogdh	oxoglutarate dehydrogenase [Source:RGD Symbol;Acc:1561359]
1.41498	3.56733	4.59787	0.00030364	0.00577317	0.480815	ENSRNOG00000022039	Zbtb40	zinc finger and BTB domain containing 40 [Source:RGD Symbol;Acc:1309866]
1.41496	2.34954	4.2084	0.000678745	0.00577317	-0.337138	ENSRNOG00000007905	Itga7	integrin subunit alpha 7 [Source:RGD Symbol;Acc:71022]
1.41155	4.62594	4.34734	0.000508704	0.00577317	-0.00595845	ENSRNOG00000002864	Nacc1	nucleus accumbens associated 1 [Source:RGD Symbol;Acc:621003]
1.41107	2.93904	4.25401	0.000617335	0.00577317	-0.156726	ENSRNOG00000008447	Tmem132d	transmembrane protein 132D [Source:RGD Symbol;Acc:735062]
1.40544	4.85482	4.80389	0.000199526	0.00577317	0.873483	ENSRNOG00000011414	Psmc3	proteasome 26S subunit, ATPase 3 [Source:RGD Symbol;Acc:61905]
1.4029	3.19937	4.51156	0.000362488	0.00577317	0.296436	ENSRNOG00000021102	Scn1b	sodium voltage-gated channel beta subunit 1 [Source:RGD Symbol;Acc:3631]
1.39996	3.6627	4.39099	0.000464781	0.00577317	0.113514	ENSRNOG00000016778	Cops7a	COP9 signalosome subunit 7A [Source:RGD Symbol;Acc:1310070]
1.3989	6.77355	5.15646	9.82963e-05	0.00577317	1.47065	ENSRNOG00000017163	Pfkp	phosphofructokinase, platelet [Source:RGD Symbol;Acc:61893]
1.39041	4.14276	4.59599	0.000304812	0.00577317	0.501378	ENSRNOG00000015229	Zc3h4	zinc finger CCCH-type containing 4 [Source:RGD Symbol;Acc:1596943]
1.38919	3.84929	4.2148	0.000669768	0.00577317	-0.233651	ENSRNOG00000007726	Mcam	melanoma cell adhesion molecule [Source:RGD Symbol;Acc:620463]
1.38762	5.33077	4.65778	0.000268622	0.00577317	0.562268	ENSRNOG00000000851	Bag6	BAG cochaperone 6 [Source:RGD Symbol;Acc:71064]
1.38758	6.65303	5.00554	0.000132859	0.00577317	1.18381	ENSRNOG00000017032	Atp5f1a	ATP synthase F1 subunit alpha [Source:RGD Symbol;Acc:619993]
1.38403	3.68529	4.61632	0.000292384	0.00577317	0.529406	ENSRNOG00000000435	Ppt2	palmitoyl-protein thioesterase 2 [Source:RGD Symbol;Acc:620375]
1.38253	3.24866	4.5575	0.000329838	0.00577317	0.389156	ENSRNOG00000016001	Chmp1a	charged multivesicular body protein 1A [Source:RGD Symbol;Acc:1311083]
1.38183	4.81034	5.75563	3.05577e-05	0.00577317	2.64576	ENSRNOG00000004155	Samd14	sterile alpha motif domain containing 14 [Source:RGD Symbol;Acc:1306138]
1.38052	2.94928	4.30241	0.000558331	0.00577317	-0.0726684	ENSRNOG00000047768	Lamb2	laminin subunit beta 2 [Source:RGD Symbol;Acc:2988]
1.37699	5.01483	4.31062	0.000548914	0.00577317	-0.104748	ENSRNOG00000050979	Ubap1l	ubiquitin associated protein 1-like [Source:RGD Symbol;Acc:1582742]
1.37367	3.55912	4.52413	0.000353241	0.00577317	0.358248	ENSRNOG00000020675	Ccdc97	coiled-coil domain containing 97 [Source:RGD Symbol;Acc:1309393]
1.37246	3.01559	5.08906	0.000112417	0.00577317	1.26738	ENSRNOG00000006962	Stk32c	serine/threonine kinase 32C [Source:RGD Symbol;Acc:1305864]
1.37083	6.60899	4.5676	0.000323074	0.00577317	0.306732	ENSRNOG00000052080	Camk2b	calcium/calmodulin-dependent protein kinase II beta [Source:RGD Symbol;Acc:2262]
1.35883	2.9793	4.94052	0.0001514	0.00577317	1.03707	ENSRNOG00000007881	Mtmr14	myotubularin related protein 14 [Source:RGD Symbol;Acc:1304842]
1.35638	3.10935	4.52365	0.000353587	0.00577317	0.318286	ENSRNOG00000010219	Ralgds	ral guanine nucleotide dissociation stimulator [Source:RGD Symbol;Acc:3533]
1.35483	4.78995	4.22857	0.000650853	0.00577317	-0.248727	ENSRNOG00000012457	Cyc1	cytochrome c-1 [Source:RGD Symbol;Acc:1306597]
1.35329	1.57169	4.43529	0.000424149	0.00577317	-0.631335	ENSRNOG00000007683	Prdm13	PR/SET domain 13 [Source:RGD Symbol;Acc:1589883]
1.35167	5.87603	4.87905	0.000171373	0.00577317	0.958988	ENSRNOG00000013604	Gpx4	glutathione peroxidase 4 [Source:RGD Symbol;Acc:69226]
1.34399	7.23758	4.69977	0.000246562	0.00577317	0.586703	ENSRNOG00000006116	Hk2	hexokinase 2 [Source:RGD Symbol;Acc:2797]
1.34378	7.38957	4.38095	0.000474528	0.00577317	-0.0803961	ENSRNOG00000016827	Slc38a3	solute carrier family 38, member 3 [Source:RGD Symbol;Acc:628620]
1.34237	4.24038	4.3111	0.000548365	0.00577317	-0.0632525	ENSRNOG00000008673	Arpc3	actin related protein 2/3 complex, subunit 3 [Source:RGD Symbol;Acc:1311985]
1.33903	6.15325	4.59501	0.000305425	0.00577317	0.388107	ENSRNOG00000045636	Fasn	fatty acid synthase [Source:RGD Symbol;Acc:620665]
1.32864	9.29134	4.53185	0.000347678	0.00577317	0.222683	ENSRNOG00000011329	Pkm	pyruvate kinase M1/2 [Source:RGD Symbol;Acc:3337]
1.32289	6.09413	4.29004	0.00057285	0.00577317	-0.22318	ENSRNOG00000003520	Prdx2	peroxiredoxin 2 [Source:RGD Symbol;Acc:3838]
1.32068	6.62148	4.27959	0.0005854	0.00577317	-0.260764	ENSRNOG00000012055	Man2a2	mannosidase, alpha, class 2A, member 2 [Source:RGD Symbol;Acc:1310238]
1.32063	4.24704	4.35127	0.000504579	0.00577317	0.0207589	ENSRNOG00000016781	Ppib	peptidylprolyl isomerase B [Source:RGD Symbol;Acc:620312]
1.31716	5.53186	4.27314	0.000593296	0.00577317	-0.210264	ENSRNOG00000009470	Flnb	filamin B [Source:RGD Symbol;Acc:1311915]
1.31667	5.96255	4.23752	0.000638854	0.00577317	-0.318841	ENSRNOG00000020897	Prpf19	pre-mRNA processing factor 19 [Source:RGD Symbol;Acc:708496]
1.31618	5.51306	4.31036	0.000549201	0.00577317	-0.147913	ENSRNOG00000013825	Rap1gap	Rap1 GTPase-activating protein [Source:RGD Symbol;Acc:1309908]
1.31531	3.96348	4.50584	0.000366772	0.00577317	0.330693	ENSRNOG00000001420	Fis1	fission, mitochondrial 1 [Source:RGD Symbol;Acc:1306668]
1.31107	3.4607	5.07363	0.000115935	0.00577317	1.34981	ENSRNOG00000001408	Actl6b	actin-like 6B [Source:RGD Symbol;Acc:1307763]
1.31099	4.36496	4.4644	0.000399437	0.00577317	0.234956	ENSRNOG00000000437	Agpat1	1-acylglycerol-3-phosphate O-acyltransferase 1 [Source:RGD Symbol;Acc:1303287]
1.31087	4.4062	4.64537	0.000275519	0.00577317	0.577509	ENSRNOG00000050841	Ache	acetylcholinesterase [Source:RGD Symbol;Acc:69313]
1.30992	7.17579	4.61259	0.000294623	0.00577317	0.393193	ENSRNOG00000018526	Dlg4	discs large MAGUK scaffold protein 4 [Source:RGD Symbol;Acc:68424]
1.30771	3.88074	4.58882	0.00030932	0.00577317	0.485023	ENSRNOG00000021031	Grn	granulin precursor [Source:RGD Symbol;Acc:61983]
1.30685	4.23974	4.92411	0.000156486	0.00577317	1.11533	ENSRNOG00000037165	Nipal3	NIPA-like domain containing 3 [Source:RGD Symbol;Acc:1563439]
1.30453	5.06494	4.95749	0.000146318	0.00577317	1.16229	ENSRNOG00000019553	Ipo4	importin 4 [Source:RGD Symbol;Acc:1305206]
1.30363	5.54584	4.25757	0.000612785	0.00577317	-0.267351	ENSRNOG00000003349	Col23a1	collagen type XXIII alpha 1 chain [Source:RGD Symbol;Acc:727898]
1.30224	6.26923	4.60087	0.000301776	0.00577317	0.39773	ENSRNOG00000017510	Mfge8	milk fat globule EGF and factor V/VIII domain containing [Source:RGD Symbol;Acc:3083]
1.29898	3.93656	4.34152	0.000514869	0.00577317	-0.00330876	ENSRNOG00000005041	Crip2	cysteine-rich protein 2 [Source:RGD Symbol;Acc:1302959]
1.29658	4.87931	4.31175	0.000547623	0.00577317	-0.0925734	ENSRNOG00000030705	Cpsf1	cleavage and polyadenylation specific factor 1 [Source:RGD Symbol;Acc:1306406]
1.29559	2.82482	4.35761	0.000498001	0.00577317	-0.0161337	ENSRNOG00000008178	Nxn	nucleoredoxin [Source:RGD Symbol;Acc:1310489]
1.29274	3.75113	4.25097	0.000621245	0.00577317	-0.147513	ENSRNOG00000020642	Flad1	flavin adenine dinucleotide synthetase 1 [Source:RGD Symbol;Acc:1593292]
1.29186	5.6351	4.4962	0.000374126	0.00577317	0.210875	ENSRNOG00000009066	Thra	thyroid hormone receptor alpha [Source:RGD Symbol;Acc:3857]
1.29151	8.94205	4.56391	0.000325531	0.00577317	0.283721	ENSRNOG00000017895	Eno1	enolase 1 [Source:RGD Symbol;Acc:2553]
1.28841	5.20515	4.62062	0.000289819	0.00577317	0.479826	ENSRNOG00000020058	Celsr2	cadherin, EGF LAG seven-pass G-type receptor 2 [Source:RGD Symbol;Acc:69237]
1.28527	4.11321	4.20833	0.000678839	0.00577317	-0.249121	ENSRNOG00000018364	Kat2a	lysine acetyltransferase 2A [Source:RGD Symbol;Acc:1307242]
1.2821	2.39641	4.37473	0.000480667	0.00577317	0.0049323	ENSRNOG00000028641	Brpf3	bromodomain and PHD finger containing, 3 [Source:RGD Symbol;Acc:1306868]
1.27634	5.78816	4.70537	0.000243765	0.00577317	0.617831	ENSRNOG00000005697	Slc6a11	solute carrier family 6 member 11 [Source:RGD Symbol;Acc:628737]
1.27502	5.74274	5.12538	0.000104567	0.00577317	1.45648	ENSRNOG00000042289	Plcxd2	phosphatidylinositol-specific phospholipase C, X domain containing 2 [Source:RGD Symbol;Acc:1563504]
1.27367	4.08386	4.65685	0.000269132	0.00577317	0.613535	ENSRNOG00000048622	Sin3b	SIN3 transcription regulator family member B [Source:RGD Symbol;Acc:1587989]
1.26782	3.77173	4.36101	0.000494507	0.00577317	0.058315	ENSRNOG00000009195	Tnks1bp1	tankyrase 1 binding protein 1 [Source:RGD Symbol;Acc:1312021]
1.26656	5.262	4.37914	0.000476308	0.00577317	0.0130729	ENSRNOG00000005358	Pmm1	phosphomannomutase 1 [Source:RGD Symbol;Acc:1310897]
1.26286	5.08674	4.33091	0.000526304	0.00577317	-0.073275	ENSRNOG00000004159	Flii	FLII, actin remodeling protein [Source:RGD Symbol;Acc:1307590]
1.26195	6.32723	4.29237	0.000570077	0.00577317	-0.240258	ENSRNOG00000010872	Ckb	creatine kinase B [Source:RGD Symbol;Acc:2357]
1.26092	4.04051	5.42955	5.73855e-05	0.00577317	2.04264	ENSRNOG00000031485	Dpp3	dipeptidylpeptidase 3 [Source:RGD Symbol;Acc:621127]
1.26084	2.58141	4.48298	0.00038444	0.00577317	0.20024	ENSRNOG00000014783	Pgghg	protein-glucosylgalactosylhydroxylysine glucosidase [Source:RGD Symbol;Acc:1306015]
1.2588	6.74619	4.88473	0.000169421	0.00577317	0.93237	ENSRNOG00000017359	Itm2c	integral membrane protein 2C [Source:RGD Symbol;Acc:1309503]
1.25753	2.68274	4.58699	0.000310487	0.00577317	0.342049	ENSRNOG00000014761	Rasd2	RASD family, member 2 [Source:RGD Symbol;Acc:628594]
1.25671	6.40068	4.70472	0.000244089	0.00577317	0.588933	ENSRNOG00000019249	Ap3b2	adaptor related protein complex 3 subunit beta 2 [Source:RGD Symbol;Acc:1308950]
1.25557	4.94431	4.25134	0.000620772	0.00577317	-0.209371	ENSRNOG00000010409	Nol6	nucleolar protein 6 [Source:RGD Symbol;Acc:1308033]
1.25084	2.97505	4.31145	0.000547961	0.00577317	-0.0808819	ENSRNOG00000010421	Wdr91	WD repeat domain 91 [Source:RGD Symbol;Acc:1306697]
1.25028	3.72141	4.29112	0.000571563	0.00577317	-0.0793173	ENSRNOG00000007869	Wscd1	WSC domain containing 1 [Source:RGD Symbol;Acc:1308212]
1.24938	6.59911	5.52423	4.77219e-05	0.00577317	2.17798	ENSRNOG00000016218	Gtf3c1	general transcription factor IIIC subunit 1 [Source:RGD Symbol;Acc:621048]
1.24792	4.16582	4.32264	0.000535407	0.00577317	-0.0334416	ENSRNOG00000012764	Agap3	ArfGAP with GTPase domain, ankyrin repeat and PH domain 3 [Source:RGD Symbol;Acc:1310751]
1.24575	4.85056	4.66795	0.000263097	0.00577317	0.606086	ENSRNOG00000000693	Svop	SV2 related protein [Source:RGD Symbol;Acc:620277]
1.2419	5.05532	4.30444	0.000555984	0.00577317	-0.125242	ENSRNOG00000033688	Cep170b	centrosomal protein 170B [Source:RGD Symbol;Acc:1595689]
1.23773	3.26109	4.58863	0.000309441	0.00577317	0.454861	ENSRNOG00000009285	Eipr1	EARP complex and GARP complex interacting protein 1 [Source:RGD Symbol;Acc:1305817]
1.23532	4.93402	4.44246	0.000417919	0.00577317	0.159674	ENSRNOG00000014399	Aamp	angio-associated, migratory cell protein [Source:RGD Symbol;Acc:1306281]
1.23523	3.05655	4.22022	0.000662256	0.00577317	-0.223143	ENSRNOG00000008790	Gdap1l1	ganglioside-induced differentiation-associated protein 1-like 1 [Source:RGD Symbol;Acc:1304960]
1.23349	3.81061	4.47224	0.000393043	0.00577317	0.262938	ENSRNOG00000003583	Smyd2	SET and MYND domain containing 2 [Source:RGD Symbol;Acc:727785]
1.23082	1.82992	4.31761	0.000541008	0.00577317	-0.629763	ENSRNOG00000034107	C7h8orf33	similar to human chromosome 8 open reading frame 33 [Source:RGD Symbol;Acc:1597990]
1.22789	3.62255	4.84809	0.000182439	0.00577317	0.972089	ENSRNOG00000001006	Nptx2	neuronal pentraxin 2 [Source:RGD Symbol;Acc:1309447]
1.22534	4.02235	4.71935	0.00023692	0.00577317	0.731136	ENSRNOG00000002753	Adam11	ADAM metallopeptidase domain 11 [Source:RGD Symbol;Acc:1307515]
1.22459	3.83657	5.07054	0.000116652	0.00577317	1.38856	ENSRNOG00000014963	Adgrg1	adhesion G protein-coupled receptor G1 [Source:RGD Symbol;Acc:628617]
1.21981	5.71272	4.54945	0.000335333	0.00577317	0.308205	ENSRNOG00000020277	Cntnap1	contactin associated protein 1 [Source:RGD Symbol;Acc:70902]
1.21339	6.84437	4.69345	0.000249761	0.00577317	0.548115	ENSRNOG00000019484	Slc6a9	solute carrier family 6 member 9 [Source:RGD Symbol;Acc:621243]
1.21271	8.7996	4.40443	0.000452045	0.00577317	-0.0400434	ENSRNOG00000020715	Ddb1	damage-specific DNA binding protein 1 [Source:RGD Symbol;Acc:621889]
1.20942	4.01872	4.7285	0.000232549	0.00577317	0.749959	ENSRNOG00000002151	NA	NA
1.20586	6.16653	4.48721	0.000381107	0.00577317	0.162221	ENSRNOG00000049219	Rnf187	ring finger protein 187 [Source:RGD Symbol;Acc:1308636]
1.20011	2.71975	4.50848	0.000364791	0.00577317	0.249826	ENSRNOG00000017372	Higd2a	HIG1 hypoxia inducible domain family, member 2A [Source:RGD Symbol;Acc:1309691]
1.19892	4.70797	4.49767	0.000372989	0.00577317	0.275121	ENSRNOG00000011295	Anapc2	anaphase promoting complex subunit 2 [Source:RGD Symbol;Acc:1305546]
1.19799	4.93459	4.21347	0.000671625	0.00577317	-0.299046	ENSRNOG00000021017	Car11	carbonic anhydrase 11 [Source:RGD Symbol;Acc:735155]
1.19463	5.37353	4.30469	0.000555697	0.00577317	-0.140624	ENSRNOG00000043150	Arfgap1	ADP-ribosylation factor GTPase activating protein 1 [Source:RGD Symbol;Acc:708452]
1.19247	3.83321	4.37834	0.000477097	0.00577317	0.090344	ENSRNOG00000001237	Cabin1	calcineurin binding protein 1 [Source:RGD Symbol;Acc:620263]
1.18882	5.36284	4.3141	0.000544967	0.00577317	-0.127978	ENSRNOG00000006004	Phc2	polyhomeotic homolog 2 [Source:RGD Symbol;Acc:1307912]
1.1851	6.10114	5.48232	5.1773e-05	0.00577317	2.11192	ENSRNOG00000018824	Slc7a5	solute carrier family 7 member 5 [Source:RGD Symbol;Acc:620639]
1.18421	5.32061	4.42831	0.000430302	0.00577317	0.0928752	ENSRNOG00000029912	Septin5	septin 5 [Source:RGD Symbol;Acc:621763]
1.18263	5.59256	6.26162	1.18204e-05	0.00577317	3.54771	ENSRNOG00000022372	Kdm1a	lysine demethylase 1A [Source:RGD Symbol;Acc:1562975]
1.18059	4.15526	4.96194	0.000145014	0.00577317	1.18542	ENSRNOG00000017506	Cltb	clathrin, light chain B [Source:RGD Symbol;Acc:621353]
1.1799	5.16795	5.24135	8.3072e-05	0.00577317	1.69996	ENSRNOG00000017489	Gse1	Gse1 coiled-coil protein [Source:RGD Symbol;Acc:1562686]
1.17285	2.9688	4.41123	0.000445743	0.00577317	0.0559684	ENSRNOG00000022983	H2ac25	H2A clustered histone 25 [Source:RGD Symbol;Acc:621437]
1.16897	7.92205	4.7047	0.000244096	0.00577317	0.558562	ENSRNOG00000023150	Gpi	glucose-6-phosphate isomerase [Source:RGD Symbol;Acc:2727]
1.16361	5.60974	4.93072	0.000154417	0.00577317	1.07124	ENSRNOG00000052687	Megf8	multiple EGF-like-domains 8 [Source:RGD Symbol;Acc:621190]
1.16294	6.38009	4.48314	0.000384314	0.00577317	0.147372	ENSRNOG00000027487	Trim28	tripartite motif-containing 28 [Source:RGD Symbol;Acc:620289]
1.16226	3.64468	4.42833	0.000430281	0.00577317	0.186388	ENSRNOG00000028097	Slc7a14	solute carrier family 7, member 14 [Source:RGD Symbol;Acc:1594375]
1.16174	5.33485	4.50667	0.000366153	0.00577317	0.26046	ENSRNOG00000019729	Jmjd8	jumonji domain containing 8 [Source:RGD Symbol;Acc:1307381]
1.16161	4.1247	4.5548	0.000331675	0.00577317	0.418127	ENSRNOG00000052730	Psmb3	proteasome 20S subunit beta 3 [Source:RGD Symbol;Acc:61875]
1.15729	4.96931	4.61541	0.000292926	0.00577317	0.492098	ENSRNOG00000017495	Klhdc3	kelch domain containing 3 [Source:RGD Symbol;Acc:1307105]
1.15436	4.04962	4.28103	0.000583657	0.00577317	-0.093685	ENSRNOG00000021292	Rbbp4-ps2	RB binding protein 4, chromatin remodeling factor, pseudogene 2 [Source:RGD Symbol;Acc:6489142]
1.15215	3.58759	4.48513	0.000382742	0.00577317	0.292775	ENSRNOG00000020684	Vat1	vesicle amine transport 1 [Source:RGD Symbol;Acc:1308943]
1.15187	4.74732	4.25096	0.000621255	0.00577317	-0.218571	ENSRNOG00000009495	Src	SRC proto-oncogene, non-receptor tyrosine kinase [Source:RGD Symbol;Acc:620795]
1.1484	2.32997	4.99891	0.000134638	0.00577317	0.881914	ENSRNOG00000025502	Arhgef37	Rho guanine nucleotide exchange factor 37 [Source:RGD Symbol;Acc:1560471]
1.147	5.32568	4.31308	0.000546115	0.00577317	-0.128849	ENSRNOG00000004333	Flywch1	FLYWCH-type zinc finger 1 [Source:RGD Symbol;Acc:1309385]
1.14464	4.66591	4.23683	0.000639772	0.00577317	-0.239637	ENSRNOG00000002244	Pdgfra	platelet derived growth factor receptor alpha [Source:RGD Symbol;Acc:3284]
1.14102	5.64252	4.74433	0.000225176	0.00577317	0.700477	ENSRNOG00000049484	Atp9a	ATPase phospholipid transporting 9A (putative) [Source:RGD Symbol;Acc:621421]
1.13852	3.88473	4.87071	0.000174286	0.00577317	1.01186	ENSRNOG00000017843	Polr3k	RNA polymerase III subunit K [Source:RGD Symbol;Acc:1587294]
1.1347	6.4326	4.31489	0.000544072	0.00577317	-0.192175	ENSRNOG00000018255	Clptm1	CLPTM1 regulator of GABA type A receptor forward trafficking [Source:RGD Symbol;Acc:1310959]
1.12976	3.61024	4.89646	0.000165457	0.00577317	1.04769	ENSRNOG00000016507	LOC687679	similar to small nuclear ribonucleoprotein polypeptide G [Source:RGD Symbol;Acc:1583028]
1.12965	2.67051	5.37692	6.36109e-05	0.00577317	1.7113	ENSRNOG00000003088	Arhgap31	Rho GTPase activating protein 31 [Source:RGD Symbol;Acc:1306093]
1.12784	2.27668	4.34164	0.000514738	0.00577317	0.00541985	ENSRNOG00000004518	Cacnb1	calcium voltage-gated channel auxiliary subunit beta 1 [Source:RGD Symbol;Acc:68382]
1.12318	4.88976	4.49083	0.000378283	0.00577317	0.26075	ENSRNOG00000031760	Fmn1	formin 1 [Source:RGD Symbol;Acc:1306349]
1.12052	3.82328	4.43624	0.000423315	0.00577317	0.196769	ENSRNOG00000047028	Mmp24	matrix metallopeptidase 24 [Source:RGD Symbol;Acc:620202]
1.12038	6.03892	4.74629	0.000224282	0.00577317	0.697392	ENSRNOG00000016356	Got1	glutamic-oxaloacetic transaminase 1 [Source:RGD Symbol;Acc:2721]
1.11933	3.62154	4.77748	0.000210506	0.00577317	0.839108	ENSRNOG00000027264	Dagla	diacylglycerol lipase, alpha [Source:RGD Symbol;Acc:1359461]
1.11673	5.60925	4.51	0.00036365	0.00577317	0.230369	ENSRNOG00000051620	Tspan9	tetraspanin 9 [Source:RGD Symbol;Acc:1304740]
1.11199	3.79285	4.47718	0.000389059	0.00577317	0.263726	ENSRNOG00000042785	Sesn2	sestrin 2 [Source:RGD Symbol;Acc:1566319]
1.11096	4.03084	4.26825	0.000599352	0.00577317	-0.117291	ENSRNOG00000050742	Dnmbp	dynamin binding protein [Source:RGD Symbol;Acc:1583840]
1.10872	4.16496	4.73459	0.000229682	0.00577317	0.760787	ENSRNOG00000003673	Nup85	nucleoporin 85 [Source:RGD Symbol;Acc:1311942]
1.1067	6.03206	4.89237	0.000166828	0.00577317	1.01464	ENSRNOG00000018528	Nrl	neural retina leucine zipper [Source:RGD Symbol;Acc:1305197]
1.10582	3.91317	4.45655	0.000405956	0.00577317	0.231345	ENSRNOG00000002229	Adcy5	adenylate cyclase 5 [Source:RGD Symbol;Acc:71014]
1.10534	5.91001	4.94202	0.000150942	0.00577317	1.09344	ENSRNOG00000021359	Mtfr1	mitochondrial fission regulator 1 [Source:RGD Symbol;Acc:1304936]
1.10439	3.19198	4.26607	0.000602065	0.00577317	-0.12903	ENSRNOG00000046002	Micos13	mitochondrial contact site and cristae organizing system subunit 13 [Source:RGD Symbol;Acc:1588578]
1.10404	4.52773	4.93174	0.000154101	0.00577317	1.1164	ENSRNOG00000010718	Gpr153	G protein-coupled receptor 153 [Source:RGD Symbol;Acc:1564170]
1.10276	4.12905	4.66015	0.000267323	0.00577317	0.613958	ENSRNOG00000006327	Rcc2	regulator of chromosome condensation 2 [Source:RGD Symbol;Acc:1309986]
1.0997	6.47238	4.63316	0.000282479	0.00577317	0.441213	ENSRNOG00000018977	Ap3d1	adaptor related protein complex 3 subunit delta 1 [Source:RGD Symbol;Acc:1308659]
1.09917	3.56423	5.10537	0.00010882	0.00577317	1.43124	ENSRNOG00000019374	Csk	C-terminal Src kinase [Source:RGD Symbol;Acc:1308800]
1.09889	6.01932	4.48691	0.000381344	0.00577317	0.170481	ENSRNOG00000009271	Smarca4	SWI/SNF related, matrix associated, actin dependent regulator of chromatin, subfamily a, member 4 [Source:RGD Symbol;Acc:621728]
1.09829	6.33414	4.32594	0.000531749	0.00577317	-0.167636	ENSRNOG00000052620	Rack1	receptor for activated C kinase 1 [Source:RGD Symbol;Acc:69229]
1.09607	4.84768	5.2153	8.74661e-05	0.00577317	1.64252	ENSRNOG00000004805	Stac2	SH3 and cysteine rich domain 2 [Source:RGD Symbol;Acc:1305548]
1.09066	4.46645	4.32616	0.000531513	0.00577317	-0.0433727	ENSRNOG00000011375	Tsc2	TSC complex subunit 2 [Source:RGD Symbol;Acc:3908]
1.09004	2.76149	4.42368	0.000434433	0.00577317	0.0768705	ENSRNOG00000028254	Tmem141	transmembrane protein 141 [Source:RGD Symbol;Acc:1561492]
1.08749	5.33211	4.35649	0.000499159	0.00577317	-0.0442637	ENSRNOG00000009598	Ncaph2	non-SMC condensin II complex, subunit H2 [Source:RGD Symbol;Acc:1565937]
1.08598	3.81201	4.24954	0.0006231	0.00577317	-0.154753	ENSRNOG00000000663	Tfip11	tuftelin interacting protein 11 [Source:RGD Symbol;Acc:1311449]
1.08429	6.19666	4.53164	0.000347831	0.00577317	0.243927	ENSRNOG00000006403	Nectin1	nectin cell adhesion molecule 1 [Source:RGD Symbol;Acc:620791]
1.0822	5.16525	4.39771	0.000458373	0.00577317	0.0468785	ENSRNOG00000003975	Pfn1	profilin 1 [Source:RGD Symbol;Acc:621825]
1.08208	5.03157	4.45631	0.000406154	0.00577317	0.1654	ENSRNOG00000007645	Kcnj9	potassium inwardly-rectifying channel, subfamily J, member 9 [Source:RGD Symbol;Acc:621440]
1.08176	3.86033	4.40911	0.000447697	0.00577317	0.146073	ENSRNOG00000020778	Chrnb2	cholinergic receptor nicotinic beta 2 subunit [Source:RGD Symbol;Acc:2350]
1.08004	5.77921	4.28966	0.000573296	0.00577317	-0.207728	ENSRNOG00000002886	Myh10	myosin heavy chain 10 [Source:RGD Symbol;Acc:71000]
1.07781	4.04487	4.51827	0.000357519	0.00577317	0.339972	ENSRNOG00000018399	Cpne6	copine 6 [Source:RGD Symbol;Acc:1583895]
1.07439	6.87649	4.43438	0.000424942	0.00577317	0.0284085	ENSRNOG00000006604	Thy1	Thy-1 cell surface antigen [Source:RGD Symbol;Acc:3860]
1.072	5.66367	4.2464	0.00062718	0.00577317	-0.288037	ENSRNOG00000010793	Spryd3	SPRY domain containing 3 [Source:RGD Symbol;Acc:1561500]
1.07129	5.4337	5.73612	3.17192e-05	0.00577317	2.60517	ENSRNOG00000003163	Sdhc	succinate dehydrogenase complex subunit C [Source:RGD Symbol;Acc:1359454]
1.07048	4.85599	5.45996	5.40787e-05	0.00577317	2.10292	ENSRNOG00000003812	Nlgn3	neuroligin 3 [Source:RGD Symbol;Acc:621119]
1.06773	4.50155	4.84155	0.000184869	0.00577317	0.947191	ENSRNOG00000011334	Tmem63c	transmembrane protein 63c [Source:RGD Symbol;Acc:1310207]
1.06622	2.27253	4.5219	0.00035486	0.00577317	0.166469	ENSRNOG00000014322	Kazn	kazrin, periplakin interacting protein [Source:RGD Symbol;Acc:1359147]
1.06477	5.50726	4.49178	0.000377544	0.00577317	0.200376	ENSRNOG00000057817	Epb41l1	erythrocyte membrane protein band 4.1-like 1 [Source:RGD Symbol;Acc:71087]
1.06448	3.44405	5.07884	0.000114735	0.00577317	1.40412	ENSRNOG00000054548	Srpk3	SRSF protein kinase 3 [Source:RGD Symbol;Acc:727856]
1.06409	5.37762	4.29752	0.000564023	0.00577317	-0.177599	ENSRNOG00000007133	Plxnb2	plexin B2 [Source:RGD Symbol;Acc:1305495]
1.06383	8.3182	4.42353	0.000434566	0.00577317	-0.00696735	ENSRNOG00000051911	Rbp3	retinol binding protein 3 [Source:RGD Symbol;Acc:3545]
1.06362	4.48234	4.46736	0.000397015	0.00577317	0.232642	ENSRNOG00000005083	Rtfdc1	replication termination factor 2 domain containing 1 [Source:RGD Symbol;Acc:1311072]
1.05064	5.28371	4.54128	0.000341007	0.00577317	0.337456	ENSRNOG00000018233	Gas6	growth arrest specific 6 [Source:RGD Symbol;Acc:61913]
1.04918	5.79054	4.39932	0.000456844	0.00577317	0.0043781	ENSRNOG00000021025	Ppp2r5b	protein phosphatase 2, regulatory subunit B', beta [Source:RGD Symbol;Acc:727786]
1.04887	5.56188	6.44342	8.47491e-06	0.00577317	3.86495	ENSRNOG00000052990	Cers5	ceramide synthase 5 [Source:RGD Symbol;Acc:1311597]
1.0485	4.57919	4.90478	0.000162704	0.00577317	1.07286	ENSRNOG00000003026	Rad23a	RAD23 homolog A, nucleotide excision repair protein [Source:RGD Symbol;Acc:1309899]
1.04602	5.49338	4.47998	0.000386821	0.00577317	0.165287	ENSRNOG00000057125	Ddr1	discoidin domain receptor tyrosine kinase 1 [Source:RGD Symbol;Acc:2252]
1.04587	5.88467	4.46828	0.00039626	0.00577317	0.133657	ENSRNOG00000021027	Dbp	D-box binding PAR bZIP transcription factor [Source:RGD Symbol;Acc:2491]
1.04561	6.66358	4.27331	0.000593081	0.00577317	-0.292327	ENSRNOG00000048025	Cstf2	cleavage stimulation factor subunit 2 [Source:RGD Symbol;Acc:1596566]
1.0451	12.4536	4.54485	0.000338519	0.00577317	0.299621	ENSRNOG00000011144	Rho	rhodopsin [Source:RGD Symbol;Acc:3573]
1.04393	7.23348	4.70064	0.000246127	0.00577317	0.553472	ENSRNOG00000047781	Slc25a23	solute carrier family 25 member 23 [Source:RGD Symbol;Acc:1588586]
1.04357	4.30967	4.54802	0.000336322	0.00577317	0.400709	ENSRNOG00000013712	Tex261	testis expressed 261 [Source:RGD Symbol;Acc:1305851]
1.04349	6.26482	4.52406	0.000353291	0.00577317	0.225966	ENSRNOG00000014241	Ece1	endothelin converting enzyme 1 [Source:RGD Symbol;Acc:620293]
1.04329	3.41304	4.20333	0.000685942	0.00577317	-0.243496	ENSRNOG00000006049	Rfx1	regulatory factor X1 [Source:RGD Symbol;Acc:1306574]
1.04201	9.73758	4.35743	0.000498183	0.00577317	-0.117877	ENSRNOG00000004060	Calm1	calmodulin 1 [Source:RGD Symbol;Acc:2257]
1.04118	5.71302	4.71769	0.000237725	0.00577317	0.640242	ENSRNOG00000019708	Ctsf	cathepsin F [Source:RGD Symbol;Acc:1308181]
1.03783	6.26536	4.77001	0.000213726	0.00577317	0.731863	ENSRNOG00000005096	Bzw2	basic leucine zipper and W2 domains 2 [Source:RGD Symbol;Acc:621507]
1.0257	3.92713	5.22317	8.61147e-05	0.00577317	1.67028	ENSRNOG00000019850	Speg	striated muscle enriched protein kinase [Source:RGD Symbol;Acc:2124]
1.02561	2.76557	4.53359	0.000346438	0.00577317	0.298718	ENSRNOG00000009972	Rara	retinoic acid receptor, alpha [Source:RGD Symbol;Acc:3534]
1.02471	4.54568	4.38603	0.00046957	0.00577317	0.0579034	ENSRNOG00000017003	Plxna1	plexin A1 [Source:RGD Symbol;Acc:1560871]
1.02333	3.79551	4.51727	0.000358252	0.00577317	0.353547	ENSRNOG00000002932	Wdr19	WD repeat domain 19 [Source:RGD Symbol;Acc:1306997]
1.02281	4.12353	4.66808	0.00026303	0.00577317	0.631725	ENSRNOG00000021054	Men1	menin 1 [Source:RGD Symbol;Acc:3078]
1.02202	3.47272	4.32353	0.000534413	0.00577317	-0.0110974	ENSRNOG00000061876	Tas1r2	taste 1 receptor member 2 [Source:RGD Symbol;Acc:61894]
1.0215	7.36353	4.41056	0.000446363	0.00577317	-0.0307929	ENSRNOG00000011282	Ppp2r1a	protein phosphatase 2 scaffold subunit A alpha [Source:RGD Symbol;Acc:620907]
1.01876	2.93414	4.38506	0.000470514	0.00577317	0.0338321	ENSRNOG00000019613	Syt9	synaptotagmin 9 [Source:RGD Symbol;Acc:621169]
1.01731	4.36319	4.60138	0.000301462	0.00577317	0.499915	ENSRNOG00000000798	Gnl1	G protein nucleolar 1 [Source:RGD Symbol;Acc:1303051]
1.01679	5.00579	4.45159	0.000410126	0.00577317	0.142756	ENSRNOG00000003148	NA	NA
1.0138	2.79735	5.52465	4.76829e-05	0.00577317	2.02886	ENSRNOG00000023951	Tbc1d30	TBC1 domain family, member 30 [Source:RGD Symbol;Acc:1305255]
1.01241	4.03833	4.36126	0.000494247	0.00577317	0.0499598	ENSRNOG00000010257	Cuedc1	CUE domain containing 1 [Source:RGD Symbol;Acc:1304861]
1.0045	5.243	4.22238	0.000659281	0.00577317	-0.311627	ENSRNOG00000059344	Tpcn1	two pore segment channel 1 [Source:RGD Symbol;Acc:708494]
1.00422	4.95755	4.60898	0.000296809	0.00577317	0.466453	ENSRNOG00000018937	Gstm7	glutathione S-transferase, mu 7 [Source:RGD Symbol;Acc:621287]
1.00372	2.62861	4.48775	0.000380684	0.00577317	0.252368	ENSRNOG00000000219	Ano10	anoctamin 10 [Source:RGD Symbol;Acc:1308260]
1.00206	4.64568	4.26665	0.000601348	0.00577317	-0.183574	ENSRNOG00000007142	B3gat1	beta-1,3-glucuronyltransferase 1 [Source:RGD Symbol;Acc:70880]
0.997253	5.70141	4.33486	0.000522022	0.00577317	-0.126698	ENSRNOG00000011726	Grin1	glutamate ionotropic receptor NMDA type subunit 1 [Source:RGD Symbol;Acc:2736]
0.996513	4.20325	4.54818	0.000336215	0.00577317	0.396039	ENSRNOG00000012634	Fbxo10	F-box protein 10 [Source:RGD Symbol;Acc:1305465]
0.992494	6.46271	4.43018	0.000428643	0.00577317	0.0337508	ENSRNOG00000018586	Retreg2	reticulophagy regulator family member 2 [Source:RGD Symbol;Acc:1306844]
0.989603	3.70903	4.43996	0.000420079	0.00577317	0.208274	ENSRNOG00000056362	Ttll13	tubulin tyrosine ligase like 13 [Source:RGD Symbol;Acc:1310399]
0.988829	3.48306	4.31534	0.000543568	0.00577317	-0.0264236	ENSRNOG00000002908	Slc35a4	solute carrier family 35, member A4 [Source:RGD Symbol;Acc:628792]
0.987934	6.79661	4.7108	0.000241084	0.00577317	0.584622	ENSRNOG00000016727	Akr1a1	aldo-keto reductase family 1 member A1 [Source:RGD Symbol;Acc:68346]
0.987276	5.99911	4.45895	0.000403948	0.00577317	0.112104	ENSRNOG00000048194	NA	NA
0.985762	4.41182	4.48057	0.000386357	0.00577317	0.261368	ENSRNOG00000018453	Nop2	NOP2 nucleolar protein [Source:RGD Symbol;Acc:1304616]
0.985502	7.16764	4.77646	0.000210945	0.00577317	0.709422	ENSRNOG00000021317	Cct2	chaperonin containing TCP1 subunit 2 [Source:RGD Symbol;Acc:1359143]
0.983858	7.29425	4.7586	0.000218738	0.00577317	0.668773	ENSRNOG00000020075	Eef1g	eukaryotic translation elongation factor 1 gamma [Source:RGD Symbol;Acc:1302939]
0.983215	2.30264	4.21512	0.00066932	0.00577317	-0.357227	ENSRNOG00000004900	Crhr1	corticotropin releasing hormone receptor 1 [Source:RGD Symbol;Acc:61276]
0.980526	4.33725	4.2629	0.00060604	0.00577317	-0.164218	ENSRNOG00000006789	Ddit3	DNA-damage inducible transcript 3 [Source:RGD Symbol;Acc:62391]
0.977439	4.22269	4.38421	0.000471335	0.00577317	0.0864777	ENSRNOG00000058457	Chtopl1	chromatin target of PRMT1-like 1 [Source:RGD Symbol;Acc:1584868]
0.976869	5.64384	4.55111	0.000334195	0.00577317	0.3239	ENSRNOG00000017977	Smpd1	sphingomyelin phosphodiesterase 1 [Source:RGD Symbol;Acc:1549719]
0.975948	4.80312	4.4496	0.000411817	0.00577317	0.17361	ENSRNOG00000017824	Ncoa5	nuclear receptor coactivator 5 [Source:RGD Symbol;Acc:1307702]
0.974715	3.62866	4.47507	0.000390755	0.00577317	0.268423	ENSRNOG00000012053	S100a16	S100 calcium binding protein A16 [Source:RGD Symbol;Acc:1306770]
0.972137	5.29313	4.46462	0.000399258	0.00577317	0.174681	ENSRNOG00000014903	Zfyve27	zinc finger FYVE-type containing 27 [Source:RGD Symbol;Acc:735177]
0.967699	4.82806	4.24401	0.000630295	0.00577317	-0.208046	ENSRNOG00000001681	Vps26c	VPS26 endosomal protein sorting factor C [Source:RGD Symbol;Acc:1306879]
0.965903	5.25665	5.51519	4.85666e-05	0.00577317	2.19658	ENSRNOG00000015591	Cndp2	carnosine dipeptidase 2 [Source:RGD Symbol;Acc:1305827]
0.961145	4.48344	5.11402	0.00010696	0.00577317	1.45933	ENSRNOG00000013391	Sorbs2	sorbin and SH3 domain containing 2 [Source:RGD Symbol;Acc:620061]
0.960353	7.18196	4.56335	0.000325905	0.00577317	0.291619	ENSRNOG00000001194	Rrp1b	ribosomal RNA processing 1B [Source:RGD Symbol;Acc:1305633]
0.956941	4.29214	4.50933	0.000364149	0.00577317	0.307699	ENSRNOG00000003517	Tbx2	T-box transcription factor 2 [Source:RGD Symbol;Acc:1311014]
0.955492	7.78703	4.69688	0.000248017	0.00577317	0.541703	ENSRNOG00000018404	Aars1	alanyl-tRNA synthetase 1 [Source:RGD Symbol;Acc:1304832]
0.954483	5.42459	4.88836	0.000168184	0.00577317	0.98978	ENSRNOG00000014744	Pacs2	phosphofurin acidic cluster sorting protein 2 [Source:RGD Symbol;Acc:1597262]
0.951226	3.11928	4.24149	0.000633602	0.00577317	-0.185027	ENSRNOG00000021245	RGD1311739	similar to RIKEN cDNA 1700037H04 [Source:RGD Symbol;Acc:1311739]
0.950769	4.52062	4.62283	0.000288511	0.00577317	0.521624	ENSRNOG00000014530	Nav2	neuron navigator 2 [Source:RGD Symbol;Acc:619778]
0.948424	4.44819	5.72769	3.22354e-05	0.00577317	2.5939	ENSRNOG00000005561	Brinp1	BMP/retinoic acid inducible neural specific 1 [Source:RGD Symbol;Acc:708519]
0.945455	4.46682	4.4677	0.000396736	0.00577317	0.228628	ENSRNOG00000013128	Tmem179	transmembrane protein 179 [Source:RGD Symbol;Acc:1310269]
0.942628	2.96121	4.42337	0.000434712	0.00577317	0.153967	ENSRNOG00000005246	Tfap2c	transcription factor AP-2 gamma [Source:RGD Symbol;Acc:1303185]
0.935408	3.69978	4.87096	0.000174196	0.00577317	1.01623	ENSRNOG00000018830	Aff3	ALF transcription elongation factor 3 [Source:RGD Symbol;Acc:1308527]
0.93422	4.96797	4.23228	0.000645861	0.00577317	-0.265409	ENSRNOG00000012937	Wwp2	WW domain containing E3 ubiquitin protein ligase 2 [Source:RGD Symbol;Acc:1310091]
0.931575	5.58099	4.30556	0.000554703	0.00577317	-0.163967	ENSRNOG00000043377	Fdps	farnesyl diphosphate synthase [Source:RGD Symbol;Acc:68953]
0.930446	4.34564	4.28783	0.000575477	0.00577317	-0.125743	ENSRNOG00000022771	Arhgap23	Rho GTPase activating protein 23 [Source:RGD Symbol;Acc:1309742]
0.930203	7.31353	4.46869	0.000395929	0.00577317	0.0834134	ENSRNOG00000061215	Crym	crystallin, mu [Source:RGD Symbol;Acc:620943]
0.923161	5.71335	4.77156	0.000213051	0.00577317	0.745368	ENSRNOG00000000105	Cplx2	complexin 2 [Source:RGD Symbol;Acc:70945]
0.921568	3.8436	5.27919	7.70904e-05	0.00577317	1.76594	ENSRNOG00000022239	Trarg1	trafficking regulator of GLUT4 (SLC2A4) 1 [Source:RGD Symbol;Acc:1307639]
0.921361	6.71751	4.21737	0.000666198	0.00577317	-0.382061	ENSRNOG00000007687	Sema7a	semaphorin 7A (John Milton Hagen blood group) [Source:RGD Symbol;Acc:1305192]
0.920443	4.93629	4.38499	0.000470585	0.00577317	0.0200444	ENSRNOG00000008425	Nav1	neuron navigator 1 [Source:RGD Symbol;Acc:1590261]
0.919717	6.02882	4.41033	0.000446576	0.00577317	-0.00219766	ENSRNOG00000016592	Gnai2	G protein subunit alpha i2 [Source:RGD Symbol;Acc:620243]
0.91678	4.39015	4.58032	0.00031476	0.00577317	0.457318	ENSRNOG00000001443	Rhbdd2	rhomboid domain containing 2 [Source:RGD Symbol;Acc:1308231]
0.915772	5.89077	4.29963	0.000561564	0.00577317	-0.197546	ENSRNOG00000018295	Ccar2	cell cycle and apoptosis regulator 2 [Source:RGD Symbol;Acc:1309922]
0.915638	5.80345	4.39393	0.000461961	0.00577317	-0.000735602	ENSRNOG00000060154	Ddx23	DEAD-box helicase 23 [Source:RGD Symbol;Acc:1308685]
0.914148	5.86301	5.08692	0.0001129	0.00577317	1.35511	ENSRNOG00000006086	Lynx1	Ly6/neurotoxin 1 [Source:RGD Symbol;Acc:1312017]
0.911287	6.83144	4.61485	0.000293266	0.00577317	0.3867	ENSRNOG00000057988	Pfkm	phosphofructokinase, muscle [Source:RGD Symbol;Acc:68419]
0.906806	4.74991	4.80645	0.00019849	0.00577317	0.869788	ENSRNOG00000023455	Pomgnt1	protein O-linked mannose N-acetylglucosaminyltransferase 1 (beta 1,2-) [Source:RGD Symbol;Acc:1359396]
0.904801	6.66241	4.73107	0.000231336	0.00577317	0.622231	ENSRNOG00000059683	Mpp2	MAGUK p55 scaffold protein 2 [Source:RGD Symbol;Acc:620014]
0.903839	6.23061	5.9899	1.96006e-05	0.00577317	3.04898	ENSRNOG00000020433	Actn4	actinin alpha 4 [Source:RGD Symbol;Acc:61816]
0.903056	4.64727	4.49206	0.000377323	0.00577317	0.26663	ENSRNOG00000007806	Arf5	ADP-ribosylation factor 5 [Source:RGD Symbol;Acc:621278]
0.900731	4.74403	4.31298	0.000546235	0.00577317	-0.108734	ENSRNOG00000017078	Selenon	selenoprotein N [Source:RGD Symbol;Acc:1304574]
0.900208	3.77297	4.79144	0.000204628	0.00577317	0.867825	ENSRNOG00000020440	Fads2	fatty acid desaturase 2 [Source:RGD Symbol;Acc:68339]
0.897533	3.96313	4.40601	0.000450577	0.00577317	0.129908	ENSRNOG00000016371	Slc18b1	solute carrier family 18 member B1 [Source:RGD Symbol;Acc:1306962]
0.897118	5.54772	4.40238	0.000453966	0.00577317	0.02157	ENSRNOG00000013581	Extl3	exostosin-like glycosyltransferase 3 [Source:RGD Symbol;Acc:62065]
0.891897	2.88318	4.75947	0.000218352	0.00577317	0.728479	ENSRNOG00000019306	Syt12	synaptotagmin 12 [Source:RGD Symbol;Acc:621876]
0.891869	5.17218	5.96162	2.06719e-05	0.00577317	3.01476	ENSRNOG00000009350	Sez6	seizure related 6 homolog [Source:RGD Symbol;Acc:619780]
0.889165	4.42045	4.83504	0.000187323	0.00577317	0.941332	ENSRNOG00000004726	Mapkapk2	MAPK activated protein kinase 2 [Source:RGD Symbol;Acc:631362]
0.886034	5.01609	4.5015	0.000370068	0.00577317	0.258899	ENSRNOG00000004515	Pes1	pescadillo ribosomal biogenesis factor 1 [Source:RGD Symbol;Acc:1559814]
0.885028	3.74606	5.80212	2.79638e-05	0.00577317	2.68118	ENSRNOG00000019221	Gstm4	glutathione S-transferase mu 4 [Source:RGD Symbol;Acc:1565825]
0.884784	4.87184	4.35152	0.000504315	0.00577317	-0.000664569	ENSRNOG00000009881	Fam161a	FAM161 centrosomal protein A [Source:RGD Symbol;Acc:1304999]
0.88414	3.20772	4.34417	0.000512053	0.00577317	0.0226791	ENSRNOG00000047396	Rmnd5b	required for meiotic nuclear division 5 homolog B [Source:RGD Symbol;Acc:1559511]
0.883394	5.67175	5.36187	6.55166e-05	0.00577317	1.88775	ENSRNOG00000008943	Penk	proenkephalin [Source:RGD Symbol;Acc:68946]
0.879834	5.29485	4.53254	0.000347186	0.00577317	0.295264	ENSRNOG00000016156	Nptxr	neuronal pentraxin receptor [Source:RGD Symbol;Acc:628898]
0.879146	4.73898	4.80377	0.000199573	0.00577317	0.85854	ENSRNOG00000059765	Asic1	acid sensing ion channel subunit 1 [Source:RGD Symbol;Acc:71062]
0.877884	3.44331	4.45866	0.000404192	0.00577317	0.239738	ENSRNOG00000016754	Bcs1l	BCS1 homolog, ubiquinol-cytochrome c reductase complex chaperone [Source:RGD Symbol;Acc:1359658]
0.874231	7.07109	4.50473	0.000367617	0.00577317	0.159462	ENSRNOG00000016863	Pnma8b	PNMA family member 8B [Source:RGD Symbol;Acc:1560435]
0.873802	5.25346	4.89711	0.00016524	0.00577317	1.00966	ENSRNOG00000003562	Susd4	sushi domain containing 4 [Source:RGD Symbol;Acc:1564043]
0.873141	7.90214	4.5251	0.000352534	0.00577317	0.196659	ENSRNOG00000001709	Ap2m1	adaptor related protein complex 2 subunit mu 1 [Source:RGD Symbol;Acc:620135]
0.873071	5.38594	4.65391	0.000270752	0.00577317	0.531186	ENSRNOG00000001124	Rnft2	ring finger protein, transmembrane 2 [Source:RGD Symbol;Acc:1560195]
0.872242	4.72478	4.71619	0.000238449	0.00577317	0.700128	ENSRNOG00000012933	Prcc	proline rich mitotic checkpoint control factor [Source:RGD Symbol;Acc:1309037]
0.867172	6.14488	4.77359	0.000212179	0.00577317	0.73468	ENSRNOG00000053285	Mllt6	MLLT6, PHD finger containing [Source:RGD Symbol;Acc:1306689]
0.865974	6.46947	4.74633	0.000224264	0.00577317	0.660974	ENSRNOG00000019193	Stx1b	syntaxin 1B [Source:RGD Symbol;Acc:3784]
0.861022	4.86998	6.09983	1.59546e-05	0.00577317	3.25991	ENSRNOG00000032152	Rab11fip3	RAB11 family interacting protein 3 [Source:RGD Symbol;Acc:1308952]
0.86053	4.12741	4.51258	0.000361724	0.00577317	0.333467	ENSRNOG00000001123	Spring1	SREBF pathway regulator in golgi 1 [Source:RGD Symbol;Acc:1562310]
0.850865	3.92927	4.40923	0.000447588	0.00577317	0.139561	ENSRNOG00000018836	C19h1orf198	similar to human chromosome 1 open reading frame 198 [Source:RGD Symbol;Acc:1559896]
0.848364	3.25809	4.30443	0.000555994	0.00577317	-0.0506277	ENSRNOG00000012879	Fabp3	fatty acid binding protein 3 [Source:RGD Symbol;Acc:69048]
0.848247	3.08665	4.41803	0.00043953	0.00577317	0.144827	ENSRNOG00000020088	Klhl26	kelch-like family member 26 [Source:RGD Symbol;Acc:1312034]
0.846818	4.03113	4.55115	0.000334168	0.00577317	0.407256	ENSRNOG00000038297	Plekhd1	pleckstrin homology and coiled-coil domain containing D1 [Source:RGD Symbol;Acc:1566112]
0.844681	3.4799	4.59202	0.000307301	0.00577317	0.493853	ENSRNOG00000011203	Farp1	FERM, ARH/RhoGEF and pleckstrin domain protein 1 [Source:RGD Symbol;Acc:1305346]
0.840986	5.42306	4.60856	0.000297062	0.00577317	0.428955	ENSRNOG00000005332	Csdc2	cold shock domain containing C2 [Source:RGD Symbol;Acc:628780]
0.839672	5.3815	4.70189	0.0002455	0.00577317	0.633868	ENSRNOG00000025890	Opa3	outer mitochondrial membrane lipid metabolism regulator OPA3 [Source:RGD Symbol;Acc:1309147]
0.83791	4.80029	4.65864	0.000268147	0.00577317	0.586622	ENSRNOG00000001449	Pom121	POM121 transmembrane nucleoporin [Source:RGD Symbol;Acc:620680]
0.836899	5.17612	4.89956	0.000164425	0.00577317	1.01928	ENSRNOG00000001141	Srrm4	serine/arginine repetitive matrix 4 [Source:RGD Symbol;Acc:1560213]
0.835294	3.59751	4.29808	0.000563369	0.00577317	-0.0616128	ENSRNOG00000005076	Bcorl1	BCL6 co-repressor-like 1 [Source:RGD Symbol;Acc:1566108]
0.832957	8.96028	4.20357	0.000685592	0.00577317	-0.444933	ENSRNOG00000006178	Dync1h1	dynein cytoplasmic 1 heavy chain 1 [Source:RGD Symbol;Acc:2511]
0.827767	5.16301	4.67804	0.000257733	0.00577317	0.601215	ENSRNOG00000010457	Vash1	vasohibin 1 [Source:RGD Symbol;Acc:1564082]
0.826501	6.10155	4.26467	0.000603818	0.00577317	-0.285704	ENSRNOG00000015221	Eif3f	eukaryotic translation initiation factor 3, subunit F [Source:RGD Symbol;Acc:1306112]
0.823305	3.47629	4.65169	0.000271981	0.00577317	0.599971	ENSRNOG00000000701	Iscu	iron-sulfur cluster assembly enzyme [Source:RGD Symbol;Acc:1309562]
0.823026	5.4994	4.5249	0.000352678	0.00577317	0.265614	ENSRNOG00000046975	Sult4a1	sulfotransferase family 4A, member 1 [Source:RGD Symbol;Acc:69292]
0.820684	3.2744	4.28651	0.000577055	0.00577317	-0.0800004	ENSRNOG00000012442	Cemip	cell migration inducing hyaluronidase 1 [Source:RGD Symbol;Acc:1305254]
0.818088	5.45523	5.03473	0.000125313	0.00577317	1.26705	ENSRNOG00000058842	Sptbn2	spectrin, beta, non-erythrocytic 2 [Source:RGD Symbol;Acc:3751]
0.814634	7.37334	5.67685	3.55376e-05	0.00577317	2.44774	ENSRNOG00000003365	Cadm3	cell adhesion molecule 3 [Source:RGD Symbol;Acc:1307035]
0.81456	3.71469	4.48679	0.000381437	0.00577317	0.295353	ENSRNOG00000000818	Ppp1r18	protein phosphatase 1, regulatory subunit 18 [Source:RGD Symbol;Acc:1309543]
0.813294	3.48428	4.83371	0.000187829	0.00577317	0.940707	ENSRNOG00000013783	Efhd2	EF-hand domain family, member D2 [Source:RGD Symbol;Acc:1307585]
0.813106	5.73846	4.36739	0.000488026	0.00577317	-0.0592108	ENSRNOG00000002989	Nmt1	N-myristoyltransferase 1 [Source:RGD Symbol;Acc:628642]
0.80976	3.63102	4.68135	0.000255999	0.00577317	0.659933	ENSRNOG00000050169	Pet100	PET100 cytochrome c oxidase chaperone [Source:RGD Symbol;Acc:1585222]
0.808579	5.53126	4.20311	0.000686256	0.00577317	-0.376911	ENSRNOG00000021118	Nomo1	Nodal modulator 1 [Source:RGD Symbol;Acc:1305240]
0.807756	7.72123	4.2352	0.000641949	0.00577317	-0.390337	ENSRNOG00000057706	Kdm5c	lysine demethylase 5C [Source:RGD Symbol;Acc:1560601]
0.795417	9.83983	4.63702	0.00028026	0.00577317	0.43845	ENSRNOG00000020650	Slc17a7	solute carrier family 17 member 7 [Source:RGD Symbol;Acc:620101]
0.790104	4.12884	4.3568	0.000498838	0.00577317	0.0309438	ENSRNOG00000019143	Galnt2	polypeptide N-acetylgalactosaminyltransferase 2 [Source:RGD Symbol;Acc:1310692]
0.789857	5.00482	4.38804	0.000467626	0.00577317	0.0251963	ENSRNOG00000012653	Ppp1r13b	protein phosphatase 1, regulatory subunit 13B [Source:RGD Symbol;Acc:1304651]
0.789003	7.27421	5.44005	5.62205e-05	0.00577317	1.9984	ENSRNOG00000019317	Cplx3	complexin 3 [Source:RGD Symbol;Acc:1560104]
0.78818	4.30485	4.7192	0.000236992	0.00577317	0.707453	ENSRNOG00000012480	Pxylp1	2-phosphoxylose phosphatase 1 [Source:RGD Symbol;Acc:1359617]
0.782776	4.39944	4.45171	0.000410025	0.00577317	0.196299	ENSRNOG00000056009	Rab11fip5	RAB11 family interacting protein 5 [Source:RGD Symbol;Acc:1592069]
0.781803	3.35639	4.7248	0.000234307	0.00577317	0.735773	ENSRNOG00000017731	Agpat4	1-acylglycerol-3-phosphate O-acyltransferase 4 [Source:RGD Symbol;Acc:619916]
0.781081	6.81967	4.46782	0.000396638	0.00577317	0.0929403	ENSRNOG00000038372	Ndufs2	NADH:ubiquinone oxidoreductase core subunit S2 [Source:RGD Symbol;Acc:1307109]
0.77376	4.08355	4.65307	0.000271218	0.00577317	0.605338	ENSRNOG00000020717	Bod1	biorientation of chromosomes in cell division 1 [Source:RGD Symbol;Acc:1305622]
0.772478	4.47748	4.87471	0.000172882	0.00577317	1.00195	ENSRNOG00000020060	Atf5	activating transcription factor 5 [Source:RGD Symbol;Acc:628902]
0.772124	3.9698	4.24794	0.000625175	0.00577317	-0.161623	ENSRNOG00000018665	Bud13	BUD13 homolog [Source:RGD Symbol;Acc:1308076]
0.771618	4.37085	4.34102	0.0005154	0.00577317	-0.0287755	ENSRNOG00000000130	Dnajb5	DnaJ heat shock protein family (Hsp40) member B5 [Source:RGD Symbol;Acc:1307453]
0.759598	7.88006	5.12229	0.000105211	0.00577317	1.3823	ENSRNOG00000021182	Sv2a	synaptic vesicle glycoprotein 2a [Source:RGD Symbol;Acc:619715]
0.757101	8.91381	4.21916	0.000663717	0.00577317	-0.412606	ENSRNOG00000015396	Sptan1	spectrin, alpha, non-erythrocytic 1 [Source:RGD Symbol;Acc:621714]
0.754913	4.76765	5.54061	4.62286e-05	0.00577317	2.25483	ENSRNOG00000042359	Pigk	phosphatidylinositol glycan anchor biosynthesis, class K [Source:RGD Symbol;Acc:1306753]
0.753786	3.40811	4.20329	0.000685993	0.00577317	-0.238108	ENSRNOG00000012630	Rhoc	ras homolog family member C [Source:RGD Symbol;Acc:1304965]
0.751377	9.53082	4.61671	0.000292148	0.00577317	0.393898	ENSRNOG00000013009	Ldha	lactate dehydrogenase A [Source:RGD Symbol;Acc:2996]
0.749825	4.50806	4.3025	0.000558233	0.00577317	-0.0959706	ENSRNOG00000012162	Mpdu1	mannose-P-dolichol utilization defect 1 [Source:RGD Symbol;Acc:1307699]
0.7489	6.01664	4.22497	0.000655741	0.00577317	-0.362498	ENSRNOG00000009960	Puf60	poly-U binding splicing factor 60 [Source:RGD Symbol;Acc:621674]
0.746679	4.85673	4.24726	0.00062606	0.00577317	-0.238798	ENSRNOG00000001410	Gigyf1	GRB10 interacting GYF protein 1 [Source:RGD Symbol;Acc:1309933]
0.745422	5.50475	4.34801	0.000507999	0.00577317	-0.0966613	ENSRNOG00000055305	Parvb	parvin, beta [Source:RGD Symbol;Acc:1311485]
0.741737	3.68167	4.30312	0.000557508	0.00577317	-0.0516265	ENSRNOG00000045653	NA	NA
0.736649	6.10014	4.68254	0.000255379	0.00577317	0.545982	ENSRNOG00000020255	Sars1	seryl-tRNA synthetase 1 [Source:RGD Symbol;Acc:628813]
0.73598	6.51371	4.32728	0.000530283	0.00577317	-0.180431	ENSRNOG00000022877	Poldip3	DNA polymerase delta interacting protein 3 [Source:RGD Symbol;Acc:1311073]
0.735877	5.4467	4.54906	0.000335607	0.00577317	0.317209	ENSRNOG00000000780	Ppp1r11	protein phosphatase 1, regulatory (inhibitor) subunit 11 [Source:RGD Symbol;Acc:1303163]
0.734662	4.35437	5.03125	0.000126189	0.00577317	1.30958	ENSRNOG00000012747	Spock1	sparc/osteonectin, cwcv and kazal like domains proteoglycan 1 [Source:RGD Symbol;Acc:1311496]
0.732683	6.47927	4.20938	0.00067736	0.00577317	-0.419556	ENSRNOG00000015417	Kansl3	KAT8 regulatory NSL complex subunit 3 [Source:RGD Symbol;Acc:1309220]
0.732509	5.41854	4.30348	0.0005571	0.00577317	-0.170141	ENSRNOG00000005193	Pfas	phosphoribosylformylglycinamidine synthase [Source:RGD Symbol;Acc:1304926]
0.730891	3.00549	4.53888	0.000342693	0.00577317	0.372959	ENSRNOG00000012593	Mmel1	membrane metallo-endopeptidase-like 1 [Source:RGD Symbol;Acc:1309299]
0.722845	6.56455	4.59097	0.000307959	0.00577317	0.349345	ENSRNOG00000003626	Atp5pd	ATP synthase peripheral stalk subunit d [Source:RGD Symbol;Acc:620083]
0.722555	5.0665	4.54466	0.000338651	0.00577317	0.339082	ENSRNOG00000030245	Tango2	transport and golgi organization 2 homolog [Source:RGD Symbol;Acc:1310348]
0.720991	5.08171	4.20802	0.000679278	0.00577317	-0.357722	ENSRNOG00000029535	Nrbp2	nuclear receptor binding protein 2 [Source:RGD Symbol;Acc:1591749]
0.718322	7.92718	4.72573	0.00023386	0.00577317	0.598187	ENSRNOG00000053362	Gabarapl1	GABA type A receptor associated protein like 1 [Source:RGD Symbol;Acc:1596143]
0.717422	5.23935	5.04102	0.000123746	0.00577317	1.2954	ENSRNOG00000022802	Tmem184b	transmembrane protein 184B [Source:RGD Symbol;Acc:1306591]
0.716329	4.28262	4.66776	0.0002632	0.00577317	0.619834	ENSRNOG00000013642	Lrrc41	leucine rich repeat containing 41 [Source:RGD Symbol;Acc:1311221]
0.710999	3.81746	4.22569	0.000654761	0.00577317	-0.210315	ENSRNOG00000007364	Rab15	RAB15, member RAS oncogene family [Source:RGD Symbol;Acc:735172]
0.709044	6.44198	4.99193	0.000136538	0.00577317	1.14751	ENSRNOG00000005724	Map3k7	mitogen activated protein kinase kinase kinase 7 [Source:RGD Symbol;Acc:1309438]
0.708846	6.30326	4.27746	0.000588001	0.00577317	-0.273117	ENSRNOG00000003597	Tuba4a	tubulin, alpha 4A [Source:RGD Symbol;Acc:1359623]
0.708505	4.13493	4.90817	0.000161595	0.00577317	1.07742	ENSRNOG00000003550	Acbd6	acyl-CoA binding domain containing 6 [Source:RGD Symbol;Acc:1305030]
0.707395	4.4963	4.66962	0.000262205	0.00577317	0.589536	ENSRNOG00000056184	Lrp2	LDL receptor related protein 2 [Source:RGD Symbol;Acc:68407]
0.705323	4.68947	4.47495	0.000390852	0.00577317	0.232533	ENSRNOG00000005515	Rhbdl3	rhomboid like 3 [Source:RGD Symbol;Acc:1311901]
0.704691	6.37522	4.27022	0.000596899	0.00577317	-0.294337	ENSRNOG00000036676	Csnk1d	casein kinase 1, delta [Source:RGD Symbol;Acc:71031]
0.703075	5.54504	4.93291	0.000153738	0.00577317	1.06446	ENSRNOG00000011394	Kif3c	kinesin family member 3C [Source:RGD Symbol;Acc:621538]
0.699671	3.15669	4.98523	0.000138386	0.00577317	1.20967	ENSRNOG00000016752	Crispld2	cysteine-rich secretory protein LCCL domain containing 2 [Source:RGD Symbol;Acc:620860]
0.687135	4.787	4.65093	0.000272405	0.00577317	0.55121	ENSRNOG00000003614	Mgat5	alpha-1,6-mannosylglycoprotein 6-beta-N-acetylglucosaminyltransferase [Source:RGD Symbol;Acc:620100]
0.682274	4.72913	4.25928	0.000610617	0.00577317	-0.206846	ENSRNOG00000007946	Bcl2l1	Bcl2-like 1 [Source:RGD Symbol;Acc:2200]
0.679617	5.91783	4.5439	0.000339182	0.00577317	0.272653	ENSRNOG00000003442	Adora1	adenosine A1 receptor [Source:RGD Symbol;Acc:2048]
0.6752	10.6534	4.68523	0.000253981	0.00577317	0.541016	ENSRNOG00000016638	Gnb1	G protein subunit beta 1 [Source:RGD Symbol;Acc:2718]
0.674761	7.03692	4.25538	0.00061558	0.00577317	-0.342694	ENSRNOG00000056728	G6pd	glucose-6-phosphate dehydrogenase [Source:RGD Symbol;Acc:2645]
0.67023	4.23007	4.28182	0.000582702	0.00577317	-0.128824	ENSRNOG00000009325	Fuca1	alpha-L-fucosidase 1 [Source:RGD Symbol;Acc:2636]
0.66874	4.69017	5.22172	8.6361e-05	0.00577317	1.6543	ENSRNOG00000014453	Anxa5	annexin A5 [Source:RGD Symbol;Acc:2120]
0.667154	6.26264	4.45957	0.000403435	0.00577317	0.0910958	ENSRNOG00000000060	NA	NA
0.660513	5.17424	4.36138	0.000494128	0.00577317	-0.0357591	ENSRNOG00000015153	Ints3	integrator complex subunit 3 [Source:RGD Symbol;Acc:1304593]
0.644309	3.88154	4.35658	0.000499066	0.00577317	0.0350342	ENSRNOG00000014528	Zswim6	zinc finger, SWIM-type containing 6 [Source:RGD Symbol;Acc:1306624]
0.643808	6.00244	4.3142	0.000544846	0.00577317	-0.195171	ENSRNOG00000061230	L1cam	L1 cell adhesion molecule [Source:RGD Symbol;Acc:619777]
0.64187	5.2963	4.36675	0.00048867	0.00577317	-0.0416139	ENSRNOG00000002722	Sec14l1	SEC14-like lipid binding 1 [Source:RGD Symbol;Acc:1563123]
0.638245	4.31088	4.35544	0.000500239	0.00577317	0.0132845	ENSRNOG00000008480	Kcnab3	potassium voltage-gated channel subfamily A regulatory beta subunit 3 [Source:RGD Symbol;Acc:61830]
0.630601	4.99358	6.67382	5.59541e-06	0.00577317	4.26043	ENSRNOG00000011150	Arsb	arylsulfatase B [Source:RGD Symbol;Acc:2158]
0.625477	4.47621	4.38913	0.000466571	0.00577317	0.0570054	ENSRNOG00000016358	Apba2	amyloid beta precursor protein binding family A member 2 [Source:RGD Symbol;Acc:620845]
0.624675	6.14258	5.99888	1.92727e-05	0.00577317	3.05865	ENSRNOG00000004132	Lasp1	LIM and SH3 protein 1 [Source:RGD Symbol;Acc:68408]
0.62233	3.15648	4.2435	0.000630963	0.00577317	-0.160712	ENSRNOG00000001259	Cux2	cut-like homeobox 2 [Source:RGD Symbol;Acc:1305967]
0.621272	6.58713	4.53331	0.000346637	0.00577317	0.225464	ENSRNOG00000020937	Ubtf	upstream binding transcription factor [Source:RGD Symbol;Acc:3927]
0.61981	6.05605	4.41386	0.000443328	0.00577317	0.0122089	ENSRNOG00000001139	Suds3	SDS3 homolog, SIN3A corepressor complex component [Source:RGD Symbol;Acc:1305986]
0.618738	4.7166	5.20317	8.9593e-05	0.00577317	1.61438	ENSRNOG00000009411	Chn2	chimerin 2 [Source:RGD Symbol;Acc:620140]
0.612564	5.0142	4.75177	0.000221797	0.00577317	0.745368	ENSRNOG00000032930	Trim26	tripartite motif-containing 26 [Source:RGD Symbol;Acc:1359126]
0.61165	4.38643	4.99713	0.00013512	0.00577317	1.24615	ENSRNOG00000049203	Pex5	peroxisomal biogenesis factor 5 [Source:RGD Symbol;Acc:1307612]
0.609292	5.96282	4.4127	0.000444391	0.00577317	0.00787693	ENSRNOG00000007213	Yars1	tyrosyl-tRNA synthetase 1 [Source:RGD Symbol;Acc:1307616]
0.601563	5.65339	4.66359	0.000265452	0.00577317	0.525273	ENSRNOG00000006983	Nr2c1	nuclear receptor subfamily 2, group C, member 1 [Source:RGD Symbol;Acc:3200]
0.59984	5.63223	4.48376	0.000383826	0.00577317	0.167333	ENSRNOG00000017974	Gprin1	G protein-regulated inducer of neurite outgrowth 1 [Source:RGD Symbol;Acc:1308762]
0.598288	3.39647	4.59832	0.000303358	0.00577317	0.505398	ENSRNOG00000003999	Adcy3	adenylate cyclase 3 [Source:RGD Symbol;Acc:71009]
0.591372	4.00748	4.92735	0.000155466	0.00577317	1.12023	ENSRNOG00000025023	Stat6	signal transducer and activator of transcription 6 [Source:RGD Symbol;Acc:1309063]
0.590743	5.76852	4.35783	0.000497773	0.00577317	-0.0986807	ENSRNOG00000006235	Nell2	neural EGFL like 2 [Source:RGD Symbol;Acc:620999]
0.588191	5.70854	4.5254	0.00035232	0.00577317	0.252971	ENSRNOG00000001129	Fbxo21	F-box protein 21 [Source:RGD Symbol;Acc:1307346]
0.580473	4.8999	4.97528	0.00014118	0.00577317	1.17533	ENSRNOG00000056697	Kcnab1	potassium voltage-gated channel subfamily A regulatory beta subunit 1 [Source:RGD Symbol;Acc:61827]
0.578296	6.5851	4.25686	0.000613696	0.00577317	-0.329405	ENSRNOG00000038883	Ilrun	inflammation and lipid regulator with UBA-like and NBR1-like domains [Source:RGD Symbol;Acc:1559829]
0.574067	5.4789	4.2577	0.000612618	0.00577317	-0.266923	ENSRNOG00000048309	Uqcc1	ubiquinol-cytochrome c reductase complex assembly factor 1 [Source:RGD Symbol;Acc:1585681]
0.571417	5.08383	4.26882	0.000598643	0.00577317	-0.216355	ENSRNOG00000047876	C14h1orf146	similar to human chromosome 1 open reading frame 146 [Source:RGD Symbol;Acc:1586315]
0.570822	4.20733	4.73884	0.000227704	0.00577317	0.759101	ENSRNOG00000025423	Map3k13	mitogen-activated protein kinase kinase kinase 13 [Source:RGD Symbol;Acc:1561227]
0.562575	6.08574	4.27275	0.000593775	0.00577317	-0.282732	ENSRNOG00000018650	Ap3m2	adaptor related protein complex 3 subunit mu 2 [Source:RGD Symbol;Acc:70969]
0.561188	5.45952	5.16044	9.75224e-05	0.00577317	1.50364	ENSRNOG00000024435	Galnt17	polypeptide N-acetylgalactosaminyltransferase 17 [Source:RGD Symbol;Acc:1563452]
0.552429	4.66133	4.21949	0.000663261	0.00577317	-0.281036	ENSRNOG00000013285	Imp4	IMP U3 small nucleolar ribonucleoprotein 4 [Source:RGD Symbol;Acc:1308463]
0.5488	5.98057	4.57495	0.000318242	0.00577317	0.336295	ENSRNOG00000007485	Arfgef2	ADP ribosylation factor guanine nucleotide exchange factor 2 [Source:RGD Symbol;Acc:631430]
0.546321	5.17986	4.33196	0.000525158	0.00577317	-0.0678495	ENSRNOG00000022726	Lrit2	leucine-rich repeat, Ig-like and transmembrane domains 2 [Source:RGD Symbol;Acc:1564668]
0.544284	6.34647	4.58894	0.000309245	0.00577317	0.342136	ENSRNOG00000018487	Slc3a2	solute carrier family 3 member 2 [Source:RGD Symbol;Acc:3073]
0.540135	5.58397	4.47317	0.000392288	0.00577317	0.154359	ENSRNOG00000020350	Pacs1	phosphofurin acidic cluster sorting protein 1 [Source:RGD Symbol;Acc:620579]
0.539931	4.8949	4.75478	0.000220444	0.00577317	0.755011	ENSRNOG00000004941	Gpn1	GPN-loop GTPase 1 [Source:RGD Symbol;Acc:1589985]
0.539479	6.09114	4.71799	0.000237576	0.00577317	0.614658	ENSRNOG00000004359	Wars1	tryptophanyl-tRNA synthetase 1 [Source:RGD Symbol;Acc:1308278]
0.532989	3.65643	4.23756	0.000638806	0.00577317	-0.178348	ENSRNOG00000020542	Krtcap2	keratinocyte associated protein 2 [Source:RGD Symbol;Acc:1308413]
0.531394	2.83671	4.71198	0.000240504	0.00577317	0.683749	ENSRNOG00000003276	Myo1d	myosin ID [Source:RGD Symbol;Acc:621321]
0.524216	4.4457	4.31097	0.000548508	0.00577317	-0.0685611	ENSRNOG00000022767	Elfn1	extracellular leucine-rich repeat and fibronectin type III domain containing 1 [Source:RGD Symbol;Acc:1308787]
0.52	4.57417	4.28289	0.000581405	0.00577317	-0.144809	ENSRNOG00000019971	Uba52	ubiquitin A-52 residue ribosomal protein fusion product 1 [Source:RGD Symbol;Acc:68344]
0.518595	7.11489	4.25147	0.000620609	0.00577317	-0.343207	ENSRNOG00000017022	Cerk	ceramide kinase [Source:RGD Symbol;Acc:1305019]
0.513108	8.33633	4.74763	0.00022367	0.00577317	0.64393	ENSRNOG00000036814	Atp6v0a1	ATPase H+ transporting V0 subunit a1 [Source:RGD Symbol;Acc:68405]
0.502117	3.46072	4.26772	0.000600004	0.00577317	-0.123514	ENSRNOG00000048433	Tshz2	teashirt zinc finger homeobox 2 [Source:RGD Symbol;Acc:6490867]
0.501965	9.17876	4.80211	0.000200247	0.00577317	0.753945	ENSRNOG00000002142	Cds1	CDP-diacylglycerol synthase 1 [Source:RGD Symbol;Acc:621185]
0.500923	7.39538	4.22445	0.000656452	0.00577317	-0.413279	ENSRNOG00000060045	Pi4ka	phosphatidylinositol 4-kinase alpha [Source:RGD Symbol;Acc:621213]
0.497491	6.18849	5.09384	0.00011135	0.00577317	1.34428	ENSRNOG00000004752	Nalcn	sodium leak channel, non-selective [Source:RGD Symbol;Acc:628710]
0.49011	7.6653	4.39399	0.000461909	0.00577317	-0.0700392	ENSRNOG00000006444	Fkbp4	FKBP prolyl isomerase 4 [Source:RGD Symbol;Acc:628729]
0.486153	5.62085	4.47527	0.000390597	0.00577317	0.150041	ENSRNOG00000014135	Rab11fip4	RAB11 family interacting protein 4 [Source:RGD Symbol;Acc:1305063]
0.475055	7.06502	4.61359	0.000294023	0.00577317	0.377055	ENSRNOG00000024629	Hadha	hydroxyacyl-CoA dehydrogenase trifunctional multienzyme complex subunit alpha [Source:RGD Symbol;Acc:620512]
0.467694	5.78928	4.88699	0.000168647	0.00577317	0.950552	ENSRNOG00000017434	Mgat3	beta-1,4-mannosyl-glycoprotein 4-beta-N-acetylglucosaminyltransferase [Source:RGD Symbol;Acc:3084]
0.458077	6.50603	4.31435	0.000544685	0.00577317	-0.219084	ENSRNOG00000014508	Mgll	monoglyceride lipase [Source:RGD Symbol;Acc:71039]
0.453377	7.48672	4.44028	0.000419806	0.00577317	0.0242763	ENSRNOG00000003970	Tnpo2	transportin 2 [Source:RGD Symbol;Acc:1310356]
0.446744	8.14576	4.49239	0.000377064	0.00577317	0.130975	ENSRNOG00000010217	Prrc2b	proline-rich coiled-coil 2B [Source:RGD Symbol;Acc:1595906]
0.444995	5.57007	5.36711	6.48471e-05	0.00577317	1.89785	ENSRNOG00000019276	Dele1	DAP3 binding cell death enhancer 1 [Source:RGD Symbol;Acc:735029]
0.443044	6.15906	4.65448	0.000270435	0.00577317	0.477937	ENSRNOG00000030547	Dpp6	dipeptidyl peptidase like 6 [Source:RGD Symbol;Acc:68402]
0.436276	5.33971	4.77037	0.000213571	0.00577317	0.763977	ENSRNOG00000008850	Ttc5	tetratricopeptide repeat domain 5 [Source:RGD Symbol;Acc:1311284]
0.426501	7.6047	4.28091	0.000583803	0.00577317	-0.299357	ENSRNOG00000021441	Reln	reelin [Source:RGD Symbol;Acc:3553]
0.423559	9.88126	4.29507	0.000566896	0.00577317	-0.245018	ENSRNOG00000059720	Syp	synaptophysin [Source:RGD Symbol;Acc:3802]
0.417556	5.9773	4.59436	0.000305828	0.00577317	0.378531	ENSRNOG00000053814	Synrg	synergin, gamma [Source:RGD Symbol;Acc:620684]
0.405563	6.53525	4.3466	0.000509479	0.00577317	-0.151363	ENSRNOG00000055939	Zcchc18	zinc finger, CCHC domain containing 18 [Source:RGD Symbol;Acc:1591868]
0.40389	5.68958	4.69515	0.000248897	0.00577317	0.586819	ENSRNOG00000007744	Ehd3	EH-domain containing 3 [Source:RGD Symbol;Acc:621762]
0.400837	5.76422	4.3919	0.000463903	0.00577317	-0.0224619	ENSRNOG00000016509	Usp10	ubiquitin specific peptidase 10 [Source:RGD Symbol;Acc:1561965]
0.396401	8.65483	4.49297	0.000376619	0.00577317	0.13611	ENSRNOG00000006375	Vdac1	voltage-dependent anion channel 1 [Source:RGD Symbol;Acc:621575]
0.360804	5.96493	4.30422	0.00055624	0.00577317	-0.214724	ENSRNOG00000013089	Kif13b	kinesin family member 13B [Source:RGD Symbol;Acc:1303307]
0.355901	5.21918	5.00999	0.000131679	0.00577317	1.22036	ENSRNOG00000014264	Phactr1	phosphatase and actin regulator 1 [Source:RGD Symbol;Acc:1303187]
0.334151	6.20052	4.40833	0.000448422	0.00577317	-0.0252513	ENSRNOG00000000940	Flt1	Fms related receptor tyrosine kinase 1 [Source:RGD Symbol;Acc:2621]
0.32346	9.65004	4.26949	0.000597806	0.00577317	-0.307652	ENSRNOG00000003633	Rcvrn	recoverin [Source:RGD Symbol;Acc:620258]
-0.306821	6.02352	-4.20588	0.000682305	0.00577317	-0.426244	ENSRNOG00000016206	Uvrag	UV radiation resistance associated [Source:RGD Symbol;Acc:1589754]
-0.30887	6.43547	-4.75128	0.000222017	0.00577317	0.656125	ENSRNOG00000016250	Ammecr1l	AMMECR1 like [Source:RGD Symbol;Acc:1307915]
-0.317081	6.52873	-4.39521	0.000460745	0.00577317	-0.059432	ENSRNOG00000012264	Alkbh1	alkB homolog 1, histone H2A dioxygenase [Source:RGD Symbol;Acc:1308327]
-0.32043	6.78737	-4.41761	0.000439908	0.00577317	-0.0204118	ENSRNOG00000010676	Smarce1	SWI/SNF related, matrix associated, actin dependent regulator of chromatin, subfamily e, member 1 [Source:RGD Symbol;Acc:1304726]
-0.331939	7.5986	-4.25783	0.000612457	0.00577317	-0.349044	ENSRNOG00000000236	Zfp207	zinc finger protein 207 [Source:RGD Symbol;Acc:1308121]
-0.342509	6.05443	-4.3911	0.000464669	0.00577317	-0.0547052	ENSRNOG00000051960	Dnajc12	DnaJ heat shock protein family (Hsp40) member C12 [Source:RGD Symbol;Acc:1591898]
-0.350765	6.9227	-4.6696	0.000262212	0.00577317	0.484237	ENSRNOG00000009266	Anp32b	acidic nuclear phosphoprotein 32 family member B [Source:RGD Symbol;Acc:621285]
-0.361176	5.54332	-4.44482	0.000415891	0.00577317	0.0767522	ENSRNOG00000002912	Parn	poly(A)-specific ribonuclease [Source:RGD Symbol;Acc:1565449]
-0.361407	5.39961	-4.38794	0.000467719	0.00577317	-0.0435655	ENSRNOG00000017879	Gab1	GRB2-associated binding protein 1 [Source:RGD Symbol;Acc:1311085]
-0.362084	5.93914	-4.23183	0.000646461	0.00577317	-0.370162	ENSRNOG00000013790	Mfsd1	major facilitator superfamily domain containing 1 [Source:RGD Symbol;Acc:1305751]
-0.364479	5.26141	-4.20684	0.000680953	0.00577317	-0.371657	ENSRNOG00000033176	Zrsr2	zinc finger (CCCH type), RNA binding motif and serine/arginine rich 2 [Source:RGD Symbol;Acc:1559763]
-0.364692	6.83263	-4.54831	0.00033612	0.00577317	0.241614	ENSRNOG00000004252	Eif3h	eukaryotic translation initiation factor 3, subunit H [Source:RGD Symbol;Acc:735178]
-0.364907	6.82712	-4.5369	0.000344093	0.00577317	0.218758	ENSRNOG00000003795	Angel2	angel homolog 2 [Source:RGD Symbol;Acc:1305056]
-0.369452	6.39148	-5.05947	0.000119262	0.00577317	1.26347	ENSRNOG00000014155	Spart	spartin [Source:RGD Symbol;Acc:1305900]
-0.376667	7.86562	-4.22385	0.000657269	0.00577317	-0.417954	ENSRNOG00000002338	Dgke	diacylglycerol kinase epsilon [Source:RGD Symbol;Acc:1560914]
-0.378182	8.00804	-4.39232	0.000463505	0.00577317	-0.0741928	ENSRNOG00000036839	Hnrnpa1	heterogeneous nuclear ribonucleoprotein A1 [Source:RGD Symbol;Acc:69234]
-0.381607	6.93679	-4.47908	0.000387546	0.00577317	0.101668	ENSRNOG00000001773	Senp2	SUMO specific peptidase 2 [Source:RGD Symbol;Acc:708378]
-0.381775	4.88004	-4.52152	0.000355141	0.00577317	0.282473	ENSRNOG00000060931	Rspry1	ring finger and SPRY domain containing 1 [Source:RGD Symbol;Acc:1308847]
-0.386104	6.53181	-4.52118	0.000355386	0.00577317	0.192166	ENSRNOG00000058588	Nfxl1	nuclear transcription factor, X-box binding-like 1 [Source:RGD Symbol;Acc:1359201]
-0.389257	5.70364	-4.29925	0.000562005	0.00577317	-0.220259	ENSRNOG00000002824	NA	NA
-0.390352	6.18026	-4.52216	0.000354668	0.00577317	0.204008	ENSRNOG00000011949	Ndufb5	NADH:ubiquinone oxidoreductase subunit B5 [Source:RGD Symbol;Acc:1305909]
-0.391876	7.94775	-4.86665	0.00017572	0.00577317	0.876739	ENSRNOG00000011653	Washc2c	WASH complex subunit 2C [Source:RGD Symbol;Acc:735230]
-0.392427	7.59835	-4.60856	0.000297064	0.00577317	0.359486	ENSRNOG00000031328	Zfp110	zinc finger protein 110 [Source:RGD Symbol;Acc:1306339]
-0.393702	8.64802	-4.60143	0.000301435	0.00577317	0.352748	ENSRNOG00000011893	Rps3a	ribosomal protein S3a [Source:RGD Symbol;Acc:62078]
-0.393959	6.83793	-5.25888	8.02436e-05	0.00577317	1.64685	ENSRNOG00000012455	Tardbp	TAR DNA binding protein [Source:RGD Symbol;Acc:1310906]
-0.394491	5.03596	-4.4877	0.000380723	0.00577317	0.215833	ENSRNOG00000009664	Ankrd42	ankyrin repeat domain 42 [Source:RGD Symbol;Acc:1310789]
-0.396164	6.0745	-4.4302	0.000428623	0.00577317	0.0213428	ENSRNOG00000000155	Cog3	component of oligomeric golgi complex 3 [Source:RGD Symbol;Acc:1304555]
-0.396185	6.37518	-4.48408	0.000383573	0.00577317	0.122597	ENSRNOG00000012718	Zfp451	zinc finger protein 451 [Source:RGD Symbol;Acc:1305865]
-0.399686	6.99446	-4.45865	0.0004042	0.00577317	0.0588919	ENSRNOG00000014419	Brd7	bromodomain containing 7 [Source:RGD Symbol;Acc:1309891]
-0.399789	4.65165	-4.34725	0.000508796	0.00577317	-0.0378114	ENSRNOG00000026690	Kin	Kin17 DNA and RNA binding protein [Source:RGD Symbol;Acc:1596107]
-0.400943	7.23582	-4.20592	0.000682252	0.00577317	-0.454588	ENSRNOG00000002724	Prpsap2	phosphoribosyl pyrophosphate synthetase-associated protein 2 [Source:RGD Symbol;Acc:620207]
-0.407976	7.73775	-4.52864	0.00034998	0.00577317	0.19979	ENSRNOG00000024470	Lman1	lectin, mannose-binding, 1 [Source:RGD Symbol;Acc:71020]
-0.409772	6.64032	-4.68714	0.000252993	0.00577317	0.524519	ENSRNOG00000020782	Pspc1	paraspeckle component 1 [Source:RGD Symbol;Acc:1310122]
-0.412106	9.43224	-5.0287	0.000126834	0.00577317	1.21366	ENSRNOG00000018651	Agtpbp1	ATP/GTP binding carboxypeptidase 1 [Source:RGD Symbol;Acc:1306307]
-0.414656	5.08406	-5.53553	4.66865e-05	0.00577317	2.23194	ENSRNOG00000010556	Intu	inturned planar cell polarity protein [Source:RGD Symbol;Acc:1309446]
-0.414874	6.65524	-4.21135	0.000674585	0.00577317	-0.43761	ENSRNOG00000060262	Prps1	phosphoribosyl pyrophosphate synthetase 1 [Source:RGD Symbol;Acc:61955]
-0.414946	7.11061	-4.94977	0.000148607	0.00577317	1.03957	ENSRNOG00000016912	Btf3	basic transcription factor 3 [Source:RGD Symbol;Acc:1308095]
-0.417167	5.66865	-5.33251	6.94064e-05	0.00577317	1.81949	ENSRNOG00000013660	Cog6	component of oligomeric golgi complex 6 [Source:RGD Symbol;Acc:1303283]
-0.417359	8.88986	-4.47904	0.000387578	0.00577317	0.104902	ENSRNOG00000046741	Itsn2	intersectin 2 [Source:RGD Symbol;Acc:1590890]
-0.417852	7.62976	-4.31739	0.000541259	0.00577317	-0.228329	ENSRNOG00000050321	Zzz3	zinc finger, ZZ-type containing 3 [Source:RGD Symbol;Acc:1565468]
-0.418417	7.24845	-4.27792	0.00058744	0.00577317	-0.30626	ENSRNOG00000055382	Hcn1	hyperpolarization-activated cyclic nucleotide-gated potassium channel 1 [Source:RGD Symbol;Acc:620688]
-0.420313	5.99116	-4.56337	0.000325893	0.00577317	0.30083	ENSRNOG00000003946	Tor1aip1	torsin 1A interacting protein 1 [Source:RGD Symbol;Acc:628851]
-0.420578	7.81563	-4.82133	0.000192595	0.00577317	0.785054	ENSRNOG00000013061	Tusc3	tumor suppressor candidate 3 [Source:RGD Symbol;Acc:1303318]
-0.420764	6.2719	-4.23038	0.000648405	0.00577317	-0.387658	ENSRNOG00000008244	LOC690035	similar to Protein KIAA0586 [Source:RGD Symbol;Acc:1585176]
-0.425402	5.77959	-4.26831	0.000599274	0.00577317	-0.293708	ENSRNOG00000018046	Lgals8	galectin 8 [Source:RGD Symbol;Acc:621272]
-0.429455	7.03005	-4.90985	0.000161047	0.00577317	0.961312	ENSRNOG00000001032	Ccz1b	CCZ1 homolog B, vacuolar protein trafficking and biogenesis associated [Source:RGD Symbol;Acc:1306410]
-0.429801	4.49461	-4.70124	0.000245827	0.00577317	0.619988	ENSRNOG00000058692	Slc26a4	solute carrier family 26 member 4 [Source:RGD Symbol;Acc:3293]
-0.431837	3.49174	-4.80612	0.000198624	0.00577317	0.890353	ENSRNOG00000053869	Ppp1r3d	protein phosphatase 1, regulatory subunit 3D [Source:RGD Symbol;Acc:1586306]
-0.431893	6.50974	-4.24602	0.000627672	0.00577317	-0.364666	ENSRNOG00000000170	Slc30a4	solute carrier family 30 member 4 [Source:RGD Symbol;Acc:619750]
-0.434761	8.03119	-4.56132	0.000327265	0.00577317	0.266489	ENSRNOG00000006652	Ddx1	DEAD-box helicase 1 [Source:RGD Symbol;Acc:619903]
-0.439252	6.45942	-4.31321	0.000545965	0.00577317	-0.227982	ENSRNOG00000005528	Tbk1	TANK-binding kinase 1 [Source:RGD Symbol;Acc:1588588]
-0.442315	5.55001	-4.44267	0.00041774	0.00577317	0.0887354	ENSRNOG00000037225	Tyms	thymidylate synthetase [Source:RGD Symbol;Acc:3921]
-0.44404	6.26987	-5.37615	6.37071e-05	0.00577317	1.88553	ENSRNOG00000032700	Zbtb34	zinc finger and BTB domain containing 34 [Source:RGD Symbol;Acc:1596130]
-0.44518	5.82911	-4.54778	0.000336491	0.00577317	0.264993	ENSRNOG00000012085	Isca2	iron-sulfur cluster assembly 2 [Source:RGD Symbol;Acc:1563216]
-0.448981	4.77547	-4.25802	0.000612216	0.00577317	-0.214227	ENSRNOG00000009851	Slc38a9	solute carrier family 38, member 9 [Source:RGD Symbol;Acc:1311881]
-0.45307	5.88792	-4.29504	0.000566939	0.00577317	-0.253138	ENSRNOG00000001964	Cd47	Cd47 molecule [Source:RGD Symbol;Acc:2308]
-0.456363	6.22703	-4.23539	0.000641692	0.00577317	-0.380345	ENSRNOG00000014183	Gnaq	G protein subunit alpha q [Source:RGD Symbol;Acc:620770]
-0.457003	7.75673	-4.45536	0.000406949	0.00577317	0.0517628	ENSRNOG00000058393	Taf15	TATA-box binding protein associated factor 15 [Source:RGD Symbol;Acc:1309595]
-0.458989	5.01403	-4.76787	0.000214657	0.00577317	0.758198	ENSRNOG00000061367	Atp7a	ATPase copper transporting alpha [Source:RGD Symbol;Acc:2179]
-0.462644	5.28344	-4.56326	0.000325967	0.00577317	0.340293	ENSRNOG00000011213	Blm	BLM RecQ like helicase [Source:RGD Symbol;Acc:1308810]
-0.464106	7.01617	-4.66879	0.000262649	0.00577317	0.481068	ENSRNOG00000013239	Tle4	TLE family member 4, transcriptional corepressor [Source:RGD Symbol;Acc:3868]
-0.467553	8.04296	-4.21585	0.000668304	0.00577317	-0.432383	ENSRNOG00000029592	Srsf11	serine and arginine rich splicing factor 11 [Source:RGD Symbol;Acc:1559953]
-0.468712	5.64264	-4.39316	0.000462701	0.00577317	-0.0319077	ENSRNOG00000038002	Ccdc62	coiled-coil domain containing 62 [Source:RGD Symbol;Acc:1586391]
-0.470002	5.73738	-4.60457	0.000299501	0.00577317	0.387961	ENSRNOG00000048989	Larp7	La ribonucleoprotein 7, transcriptional regulator [Source:RGD Symbol;Acc:1592474]
-0.472842	5.90851	-4.27183	0.000594904	0.00577317	-0.288317	ENSRNOG00000001274	Vps29	VPS29 retromer complex component [Source:RGD Symbol;Acc:1308332]
-0.474858	6.62839	-4.74467	0.000225021	0.00577317	0.63971	ENSRNOG00000033973	Ccdc177	coiled-coil domain containing 177 [Source:RGD Symbol;Acc:1561115]
-0.475841	7.12056	-4.24415	0.000630111	0.00577317	-0.376992	ENSRNOG00000058053	Ube2n	ubiquitin-conjugating enzyme E2N [Source:RGD Symbol;Acc:621096]
-0.476819	7.44059	-5.56882	4.377e-05	0.00577317	2.23939	ENSRNOG00000002021	Son	SON DNA and RNA binding protein [Source:RGD Symbol;Acc:1309013]
-0.478517	4.71724	-4.792	0.000204394	0.00577317	0.819778	ENSRNOG00000012183	Glrx	glutaredoxin [Source:RGD Symbol;Acc:70951]
-0.478867	5.5438	-4.97045	0.000142555	0.00577317	1.12373	ENSRNOG00000006941	Thumpd3	THUMP domain containing 3 [Source:RGD Symbol;Acc:1560852]
-0.484232	7.74291	-4.23163	0.000646721	0.00577317	-0.401796	ENSRNOG00000000398	Zup1	zinc finger containing ubiquitin peptidase 1 [Source:RGD Symbol;Acc:1307672]
-0.485964	5.13205	-4.45175	0.000409991	0.00577317	0.121256	ENSRNOG00000003291	Creg1	cellular repressor of E1A-stimulated genes 1 [Source:RGD Symbol;Acc:1306804]
-0.486758	6.34726	-4.42394	0.000434198	0.00577317	0.00590514	ENSRNOG00000018657	Scrn3	secernin 3 [Source:RGD Symbol;Acc:1305064]
-0.486972	6.61399	-4.40604	0.000450552	0.00577317	-0.0410147	ENSRNOG00000032297	Msmo1	methylsterol monooxygenase 1 [Source:RGD Symbol;Acc:620281]
-0.48777	5.9257	-4.31523	0.000543686	0.00577317	-0.201529	ENSRNOG00000008108	Ubr7	ubiquitin protein ligase E3 component n-recognin 7 [Source:RGD Symbol;Acc:1359144]
-0.490275	4.81354	-4.56068	0.000327697	0.00577317	0.375624	ENSRNOG00000036980	Zgrf1	zinc finger, GRF-type containing 1 [Source:RGD Symbol;Acc:1305834]
-0.492309	5.89272	-4.44347	0.000417054	0.00577317	0.0567445	ENSRNOG00000018590	Drg1	developmentally regulated GTP binding protein 1 [Source:RGD Symbol;Acc:1304993]
-0.493504	7.27734	-4.6013	0.000301516	0.00577317	0.344941	ENSRNOG00000016187	Tmem67	transmembrane protein 67 [Source:RGD Symbol;Acc:1586167]
-0.494333	7.64718	-4.22548	0.000655053	0.00577317	-0.414449	ENSRNOG00000014670	Zmynd11	zinc finger, MYND-type containing 11 [Source:RGD Symbol;Acc:1303252]
-0.496943	5.9228	-4.47597	0.000390035	0.00577317	0.113931	ENSRNOG00000011195	Prkra	protein activator of interferon induced protein kinase EIF2AK2 [Source:RGD Symbol;Acc:1306707]
-0.497085	3.93409	-4.69429	0.000249335	0.00577317	0.680737	ENSRNOG00000005274	Vrk1	VRK serine/threonine kinase 1 [Source:RGD Symbol;Acc:1306069]
-0.498267	6.24614	-4.28059	0.000584195	0.00577317	-0.289038	ENSRNOG00000005063	Atl1	atlastin GTPase 1 [Source:RGD Symbol;Acc:1359232]
-0.499215	5.46557	-4.46558	0.000398467	0.00577317	0.127205	ENSRNOG00000000613	Tfam	transcription factor A, mitochondrial [Source:RGD Symbol;Acc:620682]
-0.499371	5.55401	-4.32568	0.000532045	0.00577317	-0.15632	ENSRNOG00000004360	Gemin2	gem (nuclear organelle) associated protein 2 [Source:RGD Symbol;Acc:620842]
-0.500079	8.3065	-4.37079	0.000484607	0.00577317	-0.114212	ENSRNOG00000003392	Grsf1	G-rich RNA sequence binding factor 1 [Source:RGD Symbol;Acc:1310858]
-0.50343	4.40434	-4.34115	0.000515265	0.00577317	-0.0457967	ENSRNOG00000004421	Rxylt1	ribitol xylosyltransferase 1 [Source:RGD Symbol;Acc:1309356]
-0.504384	7.95632	-4.88331	0.000169905	0.00577317	0.908192	ENSRNOG00000004201	Rims2	regulating synaptic membrane exocytosis 2 [Source:RGD Symbol;Acc:620001]
-0.505246	7.48052	-4.34542	0.000510722	0.00577317	-0.171832	ENSRNOG00000008156	Tgs1	trimethylguanosine synthase 1 [Source:RGD Symbol;Acc:1309953]
-0.505911	3.67407	-4.24318	0.000631387	0.00577317	-0.180435	ENSRNOG00000025252	Yars2	tyrosyl-tRNA synthetase 2 [Source:RGD Symbol;Acc:1311696]
-0.506061	4.39778	-5.38277	6.28857e-05	0.00577317	1.9583	ENSRNOG00000003704	Fam184b	family with sequence similarity 184, member B [Source:RGD Symbol;Acc:1564950]
-0.510704	6.04121	-4.39784	0.000458249	0.00577317	-0.0404586	ENSRNOG00000014049	Riok1	RIO kinase 1 [Source:RGD Symbol;Acc:1306086]
-0.511382	9.55628	-4.4912	0.000377988	0.00577317	0.146206	ENSRNOG00000016271	Itm2b	integral membrane protein 2B [Source:RGD Symbol;Acc:620727]
-0.5128	2.80877	-4.3405	0.000515951	0.00577317	0.0172054	ENSRNOG00000013092	Lonrf3	LON peptidase N-terminal domain and ring finger 3 [Source:RGD Symbol;Acc:1565451]
-0.513408	6.86485	-4.42781	0.000430744	0.00577317	-0.00296958	ENSRNOG00000021213	Lix1l	limb and CNS expressed 1 like [Source:RGD Symbol;Acc:1593161]
-0.513892	6.45421	-4.51145	0.000362565	0.00577317	0.169102	ENSRNOG00000010146	Ndn	necdin, MAGE family member [Source:RGD Symbol;Acc:1310526]
-0.514187	7.16207	-4.49844	0.0003724	0.00577317	0.138056	ENSRNOG00000011621	LOC100911576	heterogeneous nuclear ribonucleoproteins C1/C2-like [Source:RGD Symbol;Acc:6491888]
-0.514874	6.96445	-4.28483	0.000579072	0.00577317	-0.293155	ENSRNOG00000006485	Topors	TOP1 binding arginine/serine rich protein, E3 ubiquitin ligase [Source:RGD Symbol;Acc:1305270]
-0.516063	6.24664	-4.29048	0.000572324	0.00577317	-0.270475	ENSRNOG00000007981	Klhl23	kelch-like family member 23 [Source:RGD Symbol;Acc:1307166]
-0.516211	6.35256	-4.22608	0.000654235	0.00577317	-0.400336	ENSRNOG00000013714	Snrpd1	small nuclear ribonucleoprotein D1 polypeptide [Source:RGD Symbol;Acc:1306345]
-0.518494	6.66582	-4.26804	0.000599604	0.00577317	-0.325192	ENSRNOG00000024213	Golim4	golgi integral membrane protein 4 [Source:RGD Symbol;Acc:1310948]
-0.521627	5.92182	-4.31789	0.000540695	0.00577317	-0.198006	ENSRNOG00000023322	Ostc	oligosaccharyltransferase complex non-catalytic subunit [Source:RGD Symbol;Acc:1560708]
-0.52183	4.555	-4.59164	0.00030754	0.00577317	0.446002	ENSRNOG00000002713	Zfp672	zinc finger protein 672 [Source:RGD Symbol;Acc:1359094]
-0.523778	5.18805	-5.24281	8.2832e-05	0.00577317	1.66966	ENSRNOG00000003629	Nvl	nuclear VCP-like [Source:RGD Symbol;Acc:1311270]
-0.524524	6.00566	-4.53023	0.000348836	0.00577317	0.238413	ENSRNOG00000007221	Dut	deoxyuridine triphosphatase [Source:RGD Symbol;Acc:620849]
-0.526753	6.85571	-4.53507	0.00034539	0.00577317	0.213468	ENSRNOG00000034237	Rpl39	ribosomal protein L39 [Source:RGD Symbol;Acc:3593]
-0.528542	7.57424	-4.57833	0.000316044	0.00577317	0.298722	ENSRNOG00000007895	Pdhb	pyruvate dehydrogenase E1 subunit beta [Source:RGD Symbol;Acc:1359146]
-0.528976	6.03807	-4.2059	0.000682279	0.00577317	-0.422841	ENSRNOG00000058724	Thap6	THAP domain containing 6 [Source:RGD Symbol;Acc:1310094]
-0.531115	7.20054	-4.43468	0.000424684	0.00577317	0.00891431	ENSRNOG00000028884	Atp5mg	ATP synthase membrane subunit g [Source:RGD Symbol;Acc:1303259]
-0.531531	5.26773	-4.77942	0.000209682	0.00577317	0.765041	ENSRNOG00000043105	Lyrm2	LYR motif containing 2 [Source:RGD Symbol;Acc:1597334]
-0.532681	6.04713	-4.26985	0.000597359	0.00577317	-0.299804	ENSRNOG00000003942	Asdurf	ASNSD1 upstream open reading frame [Source:RGD Symbol;Acc:41174017]
-0.532987	7.13398	-4.35914	0.000496421	0.00577317	-0.142699	ENSRNOG00000008524	Glcci1	glucocorticoid induced 1 [Source:RGD Symbol;Acc:1563612]
-0.533477	8.3341	-4.58052	0.000314626	0.00577317	0.307569	ENSRNOG00000006779	Crot	carnitine O-octanoyltransferase [Source:RGD Symbol;Acc:70908]
-0.537298	9.04213	-5.18575	9.27421e-05	0.00577317	1.51433	ENSRNOG00000011739	Dennd4a	DENN domain containing 4A [Source:RGD Symbol;Acc:1562639]
-0.538056	6.45314	-4.94264	0.000150755	0.00577317	1.03042	ENSRNOG00000014678	Fzd5	frizzled class receptor 5 [Source:RGD Symbol;Acc:631406]
-0.539512	7.4741	-4.53286	0.000346961	0.00577317	0.206898	ENSRNOG00000027921	Rlf	RLF zinc finger [Source:RGD Symbol;Acc:1305297]
-0.540098	7.23273	-5.1935	9.13285e-05	0.00577317	1.51725	ENSRNOG00000013356	Snapin	SNAP-associated protein [Source:RGD Symbol;Acc:1560377]
-0.54202	6.14167	-4.29288	0.000569477	0.00577317	-0.254434	ENSRNOG00000019376	Zfp329	zinc finger protein 329 [Source:RGD Symbol;Acc:1565029]
-0.54346	3.29114	-4.64483	0.000275822	0.00577317	0.593041	ENSRNOG00000010919	Mbd4	methyl-CpG binding domain 4 DNA glycosylase [Source:RGD Symbol;Acc:1585874]
-0.543961	5.72367	-4.84915	0.00018205	0.00577317	0.877403	ENSRNOG00000004288	Ptrh2	peptidyl-tRNA hydrolase 2 [Source:RGD Symbol;Acc:1306819]
-0.544592	5.19177	-4.38189	0.000473602	0.00577317	-0.0120647	ENSRNOG00000012166	Adal	adenosine deaminase-like [Source:RGD Symbol;Acc:1359517]
-0.545183	5.99124	-5.16363	9.69059e-05	0.00577317	1.48046	ENSRNOG00000052787	Rsl24d1	ribosomal L24 domain containing 1 [Source:RGD Symbol;Acc:1309784]
-0.545889	6.92714	-4.23295	0.000644958	0.00577317	-0.398247	ENSRNOG00000016447	RGD1310553	similar to expressed sequence AI597479 [Source:RGD Symbol;Acc:1310553]
-0.546034	5.41715	-4.21857	0.000664538	0.00577317	-0.363875	ENSRNOG00000016719	Zfp161	zinc finger protein 161 [Source:RGD Symbol;Acc:628712]
-0.548168	5.60677	-4.71925	0.00023697	0.00577317	0.625756	ENSRNOG00000016266	Mphosph10	M-phase phosphoprotein 10 [Source:RGD Symbol;Acc:1307633]
-0.548553	7.44526	-4.33931	0.000517226	0.00577317	-0.183798	ENSRNOG00000020384	Fam13b	family with sequence similarity 13, member B [Source:RGD Symbol;Acc:1310484]
-0.549036	6.43449	-4.42338	0.000434703	0.00577317	-0.00519666	ENSRNOG00000011588	Rnf146	ring finger protein 146 [Source:RGD Symbol;Acc:1306482]
-0.550625	6.25094	-4.89437	0.000166157	0.00577317	0.944847	ENSRNOG00000002875	Klhl20	kelch-like family member 20 [Source:RGD Symbol;Acc:1309490]
-0.55108	6.77631	-4.4881	0.000380411	0.00577317	0.122301	ENSRNOG00000014341	Btbd10	BTB domain containing 10 [Source:RGD Symbol;Acc:1306301]
-0.552172	4.7119	-4.39238	0.000463443	0.00577317	0.0289322	ENSRNOG00000055222	LOC500959	triosephosphate isomerase [Source:RGD Symbol;Acc:1560534]
-0.55379	5.80059	-4.55195	0.000333621	0.00577317	0.277363	ENSRNOG00000012911	Erlin1	ER lipid raft associated 1 [Source:RGD Symbol;Acc:1307058]
-0.553989	5.30471	-4.7602	0.000218026	0.00577317	0.712965	ENSRNOG00000011313	Sorcs1	sortilin-related VPS10 domain containing receptor 1 [Source:RGD Symbol;Acc:1305910]
-0.556014	6.26567	-5.18368	9.31245e-05	0.00577317	1.50642	ENSRNOG00000011168	Micu2	mitochondrial calcium uptake 2 [Source:RGD Symbol;Acc:619739]
-0.556925	4.62174	-4.22459	0.000656266	0.00577317	-0.295892	ENSRNOG00000012683	Abhd17c	abhydrolase domain containing 17C, depalmitoylase [Source:RGD Symbol;Acc:1308210]
-0.558287	5.49767	-4.29341	0.000568852	0.00577317	-0.223694	ENSRNOG00000008593	Ryk	receptor-like tyrosine kinase [Source:RGD Symbol;Acc:620549]
-0.558388	6.2661	-4.55905	0.000328793	0.00577317	0.277682	ENSRNOG00000051868	RGD1561277	RGD1561277 [Source:RGD Symbol;Acc:1561277]
-0.558749	5.87126	-5.05523	0.000120276	0.00577317	1.27287	ENSRNOG00000019326	Cfdp1	craniofacial development protein 1 [Source:RGD Symbol;Acc:735080]
-0.559536	7.55707	-4.27013	0.000597016	0.00577317	-0.324581	ENSRNOG00000006859	Insig1	insulin induced gene 1 [Source:RGD Symbol;Acc:708457]
-0.559781	6.33777	-5.13336	0.000102919	0.00577317	1.41129	ENSRNOG00000028215	Nup160	nucleoporin 160 [Source:RGD Symbol;Acc:1311052]
-0.56052	6.66578	-4.74348	0.000225569	0.00577317	0.633518	ENSRNOG00000013381	Tsg101	tumor susceptibility 101 [Source:RGD Symbol;Acc:3909]
-0.561936	7.16409	-4.96383	0.000144466	0.00577317	1.06679	ENSRNOG00000006751	Psmd6	proteasome 26S subunit, non-ATPase 6 [Source:RGD Symbol;Acc:735127]
-0.56214	6.32414	-4.94914	0.000148796	0.00577317	1.04646	ENSRNOG00000012329	Saraf	store-operated calcium entry-associated regulatory factor [Source:RGD Symbol;Acc:1303011]
-0.562305	4.53791	-4.33758	0.000519083	0.00577317	-0.10513	ENSRNOG00000029184	Epha6	Eph receptor A6 [Source:RGD Symbol;Acc:1304614]
-0.563302	4.44187	-4.69506	0.00024894	0.00577317	0.637159	ENSRNOG00000005437	Rida	reactive intermediate imine deaminase A homolog [Source:RGD Symbol;Acc:70940]
-0.564491	7.77885	-4.46399	0.000399776	0.00577317	0.0694386	ENSRNOG00000000938	Ran	RAN, member RAS oncogene family [Source:RGD Symbol;Acc:620367]
-0.565382	4.80192	-5.24612	8.22919e-05	0.00577317	1.68646	ENSRNOG00000008546	Mrpl35	mitochondrial ribosomal protein L35 [Source:RGD Symbol;Acc:1307065]
-0.565522	5.13771	-4.85242	0.00018085	0.00577317	0.918941	ENSRNOG00000010934	Spa17	sperm autoantigenic protein 17 [Source:RGD Symbol;Acc:620154]
-0.565554	9.45064	-4.60648	0.000298335	0.00577317	0.371786	ENSRNOG00000019848	Rbm39	RNA binding motif protein 39 [Source:RGD Symbol;Acc:1310071]
-0.571784	6.34243	-4.31194	0.000547405	0.00577317	-0.222684	ENSRNOG00000016034	Cnot9	CCR4-NOT transcription complex subunit 9 [Source:RGD Symbol;Acc:1311495]
-0.572501	5.70997	-4.62053	0.000289874	0.00577317	0.418058	ENSRNOG00000051564	Rap2a	RAP2A, member of RAS oncogene family [Source:RGD Symbol;Acc:620590]
-0.575742	4.0866	-4.2826	0.000581762	0.00577317	-0.130042	ENSRNOG00000045721	NA	NA
-0.577191	7.00531	-4.25102	0.000621186	0.00577317	-0.362762	ENSRNOG00000013865	Zmym6	zinc finger MYM-type containing 6 [Source:RGD Symbol;Acc:1561833]
-0.57764	5.1616	-5.07456	0.000115719	0.00577317	1.34418	ENSRNOG00000018048	Dctn5	dynactin subunit 5 [Source:RGD Symbol;Acc:1305654]
-0.577744	5.9029	-4.6945	0.000249225	0.00577317	0.564299	ENSRNOG00000010608	Cep162	centrosomal protein 162 [Source:RGD Symbol;Acc:1307365]
-0.581251	5.15235	-4.48907	0.000379651	0.00577317	0.194261	ENSRNOG00000017119	Ciao2a	cytosolic iron-sulfur assembly component 2A [Source:RGD Symbol;Acc:1307481]
-0.582087	7.66696	-4.85929	0.000178355	0.00577317	0.859923	ENSRNOG00000056984	Baz2b	bromodomain adjacent to zinc finger domain, 2B [Source:RGD Symbol;Acc:1309801]
-0.583822	6.98728	-4.56406	0.000325432	0.00577317	0.270076	ENSRNOG00000001730	Acap2	ArfGAP with coiled-coil, ankyrin repeat and PH domains 2 [Source:RGD Symbol;Acc:1562939]
-0.585122	6.80882	-4.62269	0.000288597	0.00577317	0.390722	ENSRNOG00000031203	Scfd1	sec1 family domain containing 1 [Source:RGD Symbol;Acc:619828]
-0.588124	7.58404	-4.3944	0.000461517	0.00577317	-0.0725815	ENSRNOG00000019175	Ercc6l2	ERCC excision repair 6 like 2 [Source:RGD Symbol;Acc:1561537]
-0.589143	6.32648	-4.74206	0.000226221	0.00577317	0.632184	ENSRNOG00000004731	Ano3	anoctamin 3 [Source:RGD Symbol;Acc:1308873]
-0.591186	4.34754	-4.98743	0.000137775	0.00577317	1.21939	ENSRNOG00000006986	RGD1304624	similar to RIKEN cDNA 2700097O09 [Source:RGD Symbol;Acc:1304624]
-0.59374	6.49728	-5.67746	3.54961e-05	0.00577317	2.45061	ENSRNOG00000002342	Aldh3a2	aldehyde dehydrogenase 3 family, member A2 [Source:RGD Symbol;Acc:61866]
-0.594352	3.68246	-5.11883	0.000105939	0.00577317	1.47666	ENSRNOG00000018865	Adamts12	ADAM metallopeptidase with thrombospondin type 1 motif, 12 [Source:RGD Symbol;Acc:1307323]
-0.595001	6.91402	-4.21762	0.000665848	0.00577317	-0.429693	ENSRNOG00000017426	Rragc	Ras-related GTP binding C [Source:RGD Symbol;Acc:1311760]
-0.595177	5.37375	-4.3845	0.000471058	0.00577317	-0.0353037	ENSRNOG00000039850	Pigp	phosphatidylinositol glycan anchor biosynthesis, class P [Source:RGD Symbol;Acc:1307205]
-0.596213	9.20927	-4.21003	0.000676437	0.00577317	-0.429591	ENSRNOG00000020497	Plekha1	pleckstrin homology domain containing A1 [Source:RGD Symbol;Acc:1564153]
-0.598169	5.81861	-4.27288	0.000593612	0.00577317	-0.281565	ENSRNOG00000017222	Abraxas2	abraxas 2, BRISC complex subunit [Source:RGD Symbol;Acc:1308918]
-0.598585	7.99194	-4.2163	0.000667677	0.00577317	-0.431351	ENSRNOG00000003844	Dhx15	DEAH-box helicase 15 [Source:RGD Symbol;Acc:1308072]
-0.599721	3.98175	-5.16885	9.59058e-05	0.00577317	1.57124	ENSRNOG00000029064	Zcchc4	zinc finger CCHC-type containing 4 [Source:RGD Symbol;Acc:1311414]
-0.600182	6.16913	-5.35965	6.58035e-05	0.00577317	1.8531	ENSRNOG00000051258	NA	NA
-0.60076	6.39916	-4.50133	0.000370197	0.00577317	0.158604	ENSRNOG00000005045	Ppp2r5e	protein phosphatase 2 regulatory subunit B', epsilon [Source:RGD Symbol;Acc:1305657]
-0.601993	7.27109	-4.51995	0.000356284	0.00577317	0.180898	ENSRNOG00000023593	Upf2	UPF2, regulator of nonsense mediated mRNA decay [Source:RGD Symbol;Acc:1309178]
-0.602337	5.70186	-4.85999	0.000178102	0.00577317	0.892891	ENSRNOG00000051624	Hspe1	heat shock protein family E (Hsp10) member 1 [Source:RGD Symbol;Acc:2844]
-0.603622	4.69711	-4.49216	0.000377244	0.00577317	0.238095	ENSRNOG00000001490	Pdcd2	programmed cell death 2 [Source:RGD Symbol;Acc:61887]
-0.604778	6.02334	-4.39495	0.000460994	0.00577317	-0.0507543	ENSRNOG00000011519	Orc5	origin recognition complex, subunit 5 [Source:RGD Symbol;Acc:1561088]
-0.605714	6.50073	-4.5372	0.000343877	0.00577317	0.224717	ENSRNOG00000021264	Pcna	proliferating cell nuclear antigen [Source:RGD Symbol;Acc:3269]
-0.608677	5.41857	-5.06096	0.000118907	0.00577317	1.31042	ENSRNOG00000017876	Dnajc21	DnaJ heat shock protein family (Hsp40) member C21 [Source:RGD Symbol;Acc:621729]
-0.609072	5.59462	-4.75552	0.000220112	0.00577317	0.694534	ENSRNOG00000059057	Shld2	shieldin complex subunit 2 [Source:RGD Symbol;Acc:1565067]
-0.611369	5.02632	-5.31168	7.23086e-05	0.00577317	1.80705	ENSRNOG00000003759	Galc	galactosylceramidase [Source:RGD Symbol;Acc:1359384]
-0.612124	4.20264	-5.12381	0.000104894	0.00577317	1.47823	ENSRNOG00000025889	Gnas	GNAS complex locus [Source:RGD Symbol;Acc:2716]
-0.612148	3.56943	-4.89396	0.000166294	0.00577317	1.05953	ENSRNOG00000019189	Acat2	acetyl-CoA acetyltransferase 2 [Source:RGD Symbol;Acc:1359366]
-0.612666	8.23187	-4.70347	0.000244709	0.00577317	0.552959	ENSRNOG00000009781	Dync1i2	dynein cytoplasmic 1 intermediate chain 2 [Source:RGD Symbol;Acc:620174]
-0.613057	4.89437	-4.3727	0.000482688	0.00577317	-0.0178093	ENSRNOG00000023923	Fastkd2	FAST kinase domains 2 [Source:RGD Symbol;Acc:1307883]
-0.613778	5.95412	-4.74417	0.00022525	0.00577317	0.643568	ENSRNOG00000031398	Mab21l2	mab-21 like 2 [Source:RGD Symbol;Acc:1595520]
-0.614303	6.45541	-5.27096	7.83528e-05	0.00577317	1.67431	ENSRNOG00000053229	AABR07007905.2	None
-0.616856	6.17988	-4.7868	0.000206562	0.00577317	0.734894	ENSRNOG00000017712	Cartpt	CART prepropeptide [Source:RGD Symbol;Acc:2272]
-0.617518	7.13273	-4.87237	0.000173702	0.00577317	0.886898	ENSRNOG00000008618	Tex10	testis expressed 10 [Source:RGD Symbol;Acc:1312045]
-0.618588	6.65593	-4.34923	0.000506713	0.00577317	-0.159315	ENSRNOG00000037514	Qser1	glutamine and serine rich 1 [Source:RGD Symbol;Acc:1311804]
-0.619463	6.03389	-4.28666	0.00057688	0.00577317	-0.264694	ENSRNOG00000007246	Atxn7	ataxin 7 [Source:RGD Symbol;Acc:1562692]
-0.61988	5.43285	-4.32278	0.000535246	0.00577317	-0.170185	ENSRNOG00000011063	Dennd1b	DENN domain containing 1B [Source:RGD Symbol;Acc:1308441]
-0.62093	4.61377	-4.45003	0.000411451	0.00577317	0.147516	ENSRNOG00000037567	Iftap	intraflagellar transport associated protein [Source:RGD Symbol;Acc:1309730]
-0.6212	4.1591	-4.36918	0.00048622	0.00577317	0.0126562	ENSRNOG00000017155	Nck2	NCK adaptor protein 2 [Source:RGD Symbol;Acc:1305965]
-0.621995	4.91487	-4.47868	0.000387862	0.00577317	0.149091	ENSRNOG00000033321	Hmgb2l1	high mobility group box 2-like 1 [Source:RGD Symbol;Acc:1564519]
-0.622895	4.99842	-4.4385	0.000421347	0.00577317	0.10532	ENSRNOG00000033624	Zfp426	zinc finger protein 426 [Source:RGD Symbol;Acc:1590942]
-0.623567	6.67067	-4.95656	0.000146593	0.00577317	1.05605	ENSRNOG00000003825	Wdr75	WD repeat domain 75 [Source:RGD Symbol;Acc:1564869]
-0.623811	8.76741	-4.65885	0.000268034	0.00577317	0.46623	ENSRNOG00000002618	Ivns1abp	influenza virus NS1A binding protein [Source:RGD Symbol;Acc:1306290]
-0.624538	7.91343	-4.30414	0.000556336	0.00577317	-0.253508	ENSRNOG00000005067	Zfp36l2	zinc finger protein 36, C3H type-like 2 [Source:RGD Symbol;Acc:1308913]
-0.625117	8.02467	-4.4399	0.000420131	0.00577317	0.0244942	ENSRNOG00000032922	Dclk1	doublecortin-like kinase 1 [Source:RGD Symbol;Acc:68437]
-0.625722	7.55863	-5.05104	0.000121289	0.00577317	1.23869	ENSRNOG00000025028	Prkdc	protein kinase, DNA-activated, catalytic subunit [Source:RGD Symbol;Acc:1308982]
-0.628324	8.0373	-4.71349	0.000239765	0.00577317	0.571541	ENSRNOG00000011910	Hnrnpr	heterogeneous nuclear ribonucleoprotein R [Source:RGD Symbol;Acc:631348]
-0.628503	5.58993	-4.55663	0.000330427	0.00577317	0.291682	ENSRNOG00000059702	Tex9	testis expressed 9 [Source:RGD Symbol;Acc:1304772]
-0.62916	7.61854	-4.21634	0.000667625	0.00577317	-0.433519	ENSRNOG00000026236	Morc3	MORC family CW-type zinc finger 3 [Source:RGD Symbol;Acc:1307924]
-0.629292	6.67142	-5.23702	8.37865e-05	0.00577317	1.60739	ENSRNOG00000021013	Stx3	syntaxin 3 [Source:RGD Symbol;Acc:621005]
-0.629779	3.89137	-4.54296	0.000339832	0.00577317	0.382996	ENSRNOG00000006744	Acyp1	acylphosphatase 1 [Source:RGD Symbol;Acc:1311327]
-0.630631	7.5985	-4.55812	0.00032942	0.00577317	0.258003	ENSRNOG00000020438	Prpf38b	pre-mRNA processing factor 38B [Source:RGD Symbol;Acc:1562940]
-0.63206	7.69683	-4.75355	0.000220997	0.00577317	0.650179	ENSRNOG00000009971	Plekha8	pleckstrin homology domain containing A8 [Source:RGD Symbol;Acc:1563940]
-0.634341	2.39226	-4.23565	0.000641346	0.00577317	-0.188511	ENSRNOG00000005519	Grm3	glutamate metabotropic receptor 3 [Source:RGD Symbol;Acc:2744]
-0.635333	5.37285	-5.22369	8.60251e-05	0.00577317	1.61471	ENSRNOG00000052572	Aff2	ALF transcription elongation factor 2 [Source:RGD Symbol;Acc:1565592]
-0.63594	6.59332	-5.10638	0.0001086	0.00577317	1.35091	ENSRNOG00000014719	Snx19	sorting nexin 19 [Source:RGD Symbol;Acc:1309857]
-0.636134	6.05019	-5.01221	0.000131096	0.00577317	1.18287	ENSRNOG00000023807	Ccnyl1	cyclin Y-like 1 [Source:RGD Symbol;Acc:1310683]
-0.637055	6.17676	-4.42873	0.000429929	0.00577317	0.00812978	ENSRNOG00000025372	Glce	glucuronic acid epimerase [Source:RGD Symbol;Acc:1565253]
-0.637156	4.25378	-4.54523	0.000338254	0.00577317	0.381389	ENSRNOG00000047019	Bbip1	BBSome interacting protein 1 [Source:RGD Symbol;Acc:6498801]
-0.638004	5.67183	-4.49914	0.000371864	0.00577317	0.179044	ENSRNOG00000014917	Nck1	NCK adaptor protein 1 [Source:RGD Symbol;Acc:1310688]
-0.638228	4.86151	-5.08365	0.000113639	0.00577317	1.38372	ENSRNOG00000009297	Chchd1	coiled-coil-helix-coiled-coil-helix domain containing 1 [Source:RGD Symbol;Acc:1307134]
-0.64055	8.54857	-4.24342	0.000631076	0.00577317	-0.372057	ENSRNOG00000014000	Kif2a	kinesin family member 2A [Source:RGD Symbol;Acc:70974]
-0.640856	4.49038	-4.40613	0.00045047	0.00577317	0.0622006	ENSRNOG00000024040	Mb21d2	Mab-21 domain containing 2 [Source:RGD Symbol;Acc:1559643]
-0.641758	6.82579	-4.3597	0.00049585	0.00577317	-0.141218	ENSRNOG00000002094	Atg3	autophagy related 3 [Source:RGD Symbol;Acc:708464]
-0.641806	9.23855	-4.28787	0.000575436	0.00577317	-0.271395	ENSRNOG00000016596	Hspa4	heat shock protein family A (Hsp70) member 4 [Source:RGD Symbol;Acc:628878]
-0.642861	4.96372	-4.76235	0.000217078	0.00577317	0.752412	ENSRNOG00000011461	Ap3m1	adaptor related protein complex 3 subunit mu 1 [Source:RGD Symbol;Acc:620417]
-0.643336	7.75836	-4.36467	0.000490773	0.00577317	-0.131989	ENSRNOG00000005715	Lgr4	leucine-rich repeat-containing G protein-coupled receptor 4 [Source:RGD Symbol;Acc:628615]
-0.644107	6.74148	-4.34015	0.000516331	0.00577317	-0.180585	ENSRNOG00000019465	Gnai3	G protein subunit alpha i3 [Source:RGD Symbol;Acc:2714]
-0.645035	7.30323	-4.39231	0.00046351	0.00577317	-0.0771333	ENSRNOG00000054514	Mkln1	muskelin 1 [Source:RGD Symbol;Acc:620076]
-0.645175	4.77426	-4.71448	0.00023928	0.00577317	0.636169	ENSRNOG00000012460	Cntf	ciliary neurotrophic factor [Source:RGD Symbol;Acc:2370]
-0.645807	5.02468	-4.45523	0.000407062	0.00577317	0.130566	ENSRNOG00000002644	Utp18	UTP18 small subunit processome component [Source:RGD Symbol;Acc:1309957]
-0.648132	6.92547	-5.16849	9.59754e-05	0.00577317	1.46942	ENSRNOG00000001551	Atp5pf	ATP synthase peripheral stalk subunit F6 [Source:RGD Symbol;Acc:621376]
-0.649556	8.90667	-4.29223	0.000570249	0.00577317	-0.269161	ENSRNOG00000002565	Taf1	TATA-box binding protein associated factor 1 [Source:RGD Symbol;Acc:1562050]
-0.649965	5.97336	-4.39594	0.000460052	0.00577317	-0.0407249	ENSRNOG00000015268	Plpp6	phospholipid phosphatase 6 [Source:RGD Symbol;Acc:1566000]
-0.651262	4.65575	-4.62564	0.000286857	0.00577317	0.500535	ENSRNOG00000020087	Zfp90	zinc finger protein 90 [Source:RGD Symbol;Acc:1563077]
-0.651738	6.81701	-4.63838	0.000279481	0.00577317	0.418774	ENSRNOG00000012580	Ccdc141	coiled-coil domain containing 141 [Source:RGD Symbol;Acc:1593250]
-0.652902	6.26699	-4.39986	0.000456339	0.00577317	-0.048701	ENSRNOG00000011158	Ppp2r2a	protein phosphatase 2, regulatory subunit B, alpha [Source:RGD Symbol;Acc:620919]
-0.653319	5.68978	-4.20797	0.000679347	0.00577317	-0.397296	ENSRNOG00000004218	Klhl28	kelch-like family member 28 [Source:RGD Symbol;Acc:1311326]
-0.653477	4.83171	-4.70992	0.000241514	0.00577317	0.638943	ENSRNOG00000017258	Ica1l	islet cell autoantigen 1-like [Source:RGD Symbol;Acc:735110]
-0.653832	7.29785	-4.7938	0.00020365	0.00577317	0.729416	ENSRNOG00000014946	AABR07005588.1	THUMP domain containing 1 [Source:RGD Symbol;Acc:1308854]
-0.654428	2.66742	-4.59773	0.000303725	0.00577317	0.489859	ENSRNOG00000017105	Dpyd	dihydropyrimidine dehydrogenase [Source:RGD Symbol;Acc:621218]
-0.655099	4.97194	-4.59398	0.00030607	0.00577317	0.423262	ENSRNOG00000062108	Tomm5	translocase of outer mitochondrial membrane 5 [Source:RGD Symbol;Acc:1596808]
-0.656316	6.91665	-4.46794	0.000396539	0.00577317	0.0773163	ENSRNOG00000006412	Zhx1	zinc fingers and homeoboxes 1 [Source:RGD Symbol;Acc:620010]
-0.656768	6.46427	-5.23468	8.41744e-05	0.00577317	1.60475	ENSRNOG00000021681	Eea1	early endosome antigen 1 [Source:RGD Symbol;Acc:1310167]
-0.658281	7.52667	-4.92366	0.000156627	0.00577317	0.987379	ENSRNOG00000027860	Ggnbp2	gametogenetin binding protein 2 [Source:RGD Symbol;Acc:1302978]
-0.658726	5.9496	-4.26245	0.000606615	0.00577317	-0.322304	ENSRNOG00000007359	Gca	grancalcin [Source:RGD Symbol;Acc:1306589]
-0.659928	5.34147	-4.40847	0.000448293	0.00577317	0.0184125	ENSRNOG00000002585	Cul4b	cullin 4B [Source:RGD Symbol;Acc:1564494]
-0.660569	4.12189	-5.06611	0.000117688	0.00577317	1.37649	ENSRNOG00000012736	Znrd2	zinc ribbon domain containing 2 [Source:RGD Symbol;Acc:1593467]
-0.661029	7.59116	-4.30364	0.00055691	0.00577317	-0.256076	ENSRNOG00000027151	Lrrc58	leucine rich repeat containing 58 [Source:RGD Symbol;Acc:1307440]
-0.661107	6.66564	-4.43135	0.000427612	0.00577317	0.00699752	ENSRNOG00000003329	Ppm1d	protein phosphatase, Mg2+/Mn2+ dependent, 1D [Source:RGD Symbol;Acc:1305460]
-0.66161	4.86007	-5.80984	2.75554e-05	0.00577317	2.73957	ENSRNOG00000008222	Timm9	translocase of inner mitochondrial membrane 9 [Source:RGD Symbol;Acc:621656]
-0.662379	4.95758	-4.6617	0.000266478	0.00577317	0.552537	ENSRNOG00000043386	Commd2	COMM domain containing 2 [Source:RGD Symbol;Acc:1588810]
-0.66355	2.76782	-4.67906	0.000257201	0.00577317	0.637476	ENSRNOG00000047573	Ttc39a	tetratricopeptide repeat domain 39A [Source:RGD Symbol;Acc:1311126]
-0.665665	6.78991	-4.24775	0.000625414	0.00577317	-0.36843	ENSRNOG00000006298	Cpne3	copine 3 [Source:RGD Symbol;Acc:1310178]
-0.666627	5.81604	-4.6157	0.000292753	0.00577317	0.409859	ENSRNOG00000009451	Prpf38a	pre-mRNA processing factor 38A [Source:RGD Symbol;Acc:1311129]
-0.667181	3.8275	-4.76568	0.000215614	0.00577317	0.816758	ENSRNOG00000042201	Efcab2	EF-hand calcium binding domain 2 [Source:RGD Symbol;Acc:1308593]
-0.667781	7.72055	-4.24075	0.000634586	0.00577317	-0.383596	ENSRNOG00000011785	Xrn2	5'-3' exoribonuclease 2 [Source:RGD Symbol;Acc:1310218]
-0.66791	5.16324	-4.30396	0.000556546	0.00577317	-0.170144	ENSRNOG00000006050	Med19	mediator complex subunit 19 [Source:RGD Symbol;Acc:1311926]
-0.668571	7.91987	-4.20543	0.000682943	0.00577317	-0.44919	ENSRNOG00000017123	B2m	beta-2 microglobulin [Source:RGD Symbol;Acc:2189]
-0.668685	5.17156	-4.4531	0.00040885	0.00577317	0.121408	ENSRNOG00000025596	Ago4	argonaute RISC component 4 [Source:RGD Symbol;Acc:1304583]
-0.66878	5.8212	-4.44218	0.000418163	0.00577317	0.0557052	ENSRNOG00000010160	Ice2	interactor of little elongation complex ELL subunit 2 [Source:RGD Symbol;Acc:1585038]
-0.67085	8.92821	-4.84768	0.000182593	0.00577317	0.847789	ENSRNOG00000056487	Oxr1	oxidation resistance 1 [Source:RGD Symbol;Acc:621857]
-0.671418	5.74997	-4.81731	0.000194172	0.00577317	0.812261	ENSRNOG00000022938	Ap4e1	adaptor related protein complex 4 subunit epsilon 1 [Source:RGD Symbol;Acc:1562199]
-0.671464	7.27362	-4.2641	0.00060454	0.00577317	-0.334785	ENSRNOG00000010780	Dlc1	DLC1 Rho GTPase activating protein [Source:RGD Symbol;Acc:68416]
-0.674327	5.08144	-4.82432	0.000191432	0.00577317	0.844893	ENSRNOG00000030930	Samsn1	SAM domain, SH3 domain and nuclear localization signals, 1 [Source:RGD Symbol;Acc:620926]
-0.674617	5.14375	-4.21882	0.000664186	0.00577317	-0.358692	ENSRNOG00000010100	Tyw5	tRNA-yW synthesizing protein 5 [Source:RGD Symbol;Acc:1311269]
-0.674655	9.93497	-4.30113	0.000559813	0.00577317	-0.232016	ENSRNOG00000011841	Map2	microtubule-associated protein 2 [Source:RGD Symbol;Acc:3044]
-0.676186	6.50693	-4.30646	0.000553667	0.00577317	-0.243481	ENSRNOG00000008314	Orc3	origin recognition complex, subunit 3 [Source:RGD Symbol;Acc:1308457]
-0.676855	3.44608	-4.88302	0.000170005	0.00577317	1.03805	ENSRNOG00000016119	Fzd7	frizzled class receptor 7 [Source:RGD Symbol;Acc:2321905]
-0.678176	6.21848	-5.21514	8.74943e-05	0.00577317	1.57151	ENSRNOG00000016576	Carmil1	capping protein regulator and myosin 1 linker 1 [Source:RGD Symbol;Acc:1306623]
[truncated: 9,945 more rows]

## Sheet: male only
logFC	AveExpr	t	P.Value	adj.P.Val	B	ENSEMBL	name	description
[truncated: 10,726 more rows]
